# Supplementary material for: Semisynthetic biosensors for mapping cellular concentrations of nicotinamide adenine dinucleotides
Source: eLife. 2018 May 29;7:e32638. doi: 10.7554/eLife.32638 (PMC5990361; doi:10.7554/eLife.32638)
Supplement: Appendix 1—figure 1—source data 1 [file elife-32638-app1-fig1-data1.xlsx]

## Sheet: App1_Figure_1a 
Emission spectra of NADP-Snifit without cofactor, with 100 uM NADP+, with 100 uM NADP+ and 1 mM sulfamethoxazole (SMX)
	Intensities (a.u.)			Normalized intensities (isosbestic point: 645 nm)
Wavel. (nm)	no NADP+	100 uM NADP+	1 mM SMX, 100 uM NADP+	no NADP+	100 uM NADP+	1 mM SMX, 100 uM NADP+
540	6091	3986	7128	0.888549	0.553073	1.03907
541	5261	4027	5801	0.767469	0.558762	0.845627
542	4621	3051	4363	0.674106	0.423338	0.636006
543	4383	2508	3778	0.639387	0.347995	0.550729
544	4733	2465	3688	0.690445	0.342029	0.537609
545	4753	2429	3465	0.693363	0.337033	0.505102
546	5314	2285	3636	0.775201	0.317053	0.530029
547	5510	2276	3777	0.803793	0.315804	0.550583
548	5669	2629	3598	0.826988	0.364784	0.52449
549	6855	2776	4331	1	0.385181	0.631341
550	7343	2976	4478	1.07119	0.412932	0.65277
551	7805	3095	5070	1.13858	0.429444	0.739067
552	8929	3318	6126	1.30255	0.460386	0.893003
553	9868	3570	6605	1.43953	0.495352	0.962828
554	10757	4316	7997	1.56922	0.598862	1.16574
555	12258	4474	8485	1.78818	0.620785	1.23688
556	12790	4826	9529	1.86579	0.669627	1.38907
557	14274	5146	11050	2.08228	0.714028	1.61079
558	15829	5589	11898	2.30912	0.775496	1.7344
559	17363	6197	13167	2.5329	0.859858	1.91939
560	18562	6681	14006	2.7078	0.927015	2.04169
561	19926	6727	15592	2.90678	0.933398	2.27289
562	21733	7113	17752	3.17039	0.986957	2.58776
563	23455	7841	18977	3.42159	1.08797	2.76633
564	24159	8137	20009	3.52429	1.12904	2.91676
565	26519	8534	21592	3.86856	1.18413	3.14752
566	27985	9147	23692	4.08242	1.26918	3.45364
567	29243	9568	25098	4.26594	1.3276	3.6586
568	30540	9950	26468	4.45514	1.3806	3.85831
569	32463	10250	27686	4.73567	1.42223	4.03586
570	33102	10651	29047	4.82888	1.47787	4.23426
571	34118	10867	30346	4.9771	1.50784	4.42362
572	35023	11290	31427	5.10912	1.56653	4.5812
573	36413	11288	32361	5.31189	1.56626	4.71735
574	37158	11275	33384	5.42057	1.56445	4.86647
575	38585	11258	34593	5.62874	1.56209	5.04271
576	37512	11641	34163	5.47221	1.61524	4.98003
577	38034	11519	35333	5.54836	1.59831	5.15058
578	38199	11353	34775	5.57243	1.57527	5.06924
579	38142	11540	36191	5.56411	1.60122	5.27566
580	38607	11892	36260	5.63195	1.65006	5.28571
581	37245	10956	34551	5.43326	1.52019	5.03659
582	37414	11316	34703	5.45791	1.57014	5.05875
583	36933	11017	35120	5.38775	1.52865	5.11953
584	36965	11302	34335	5.39241	1.5682	5.0051
585	35231	10542	33614	5.13946	1.46274	4.9
586	35060	10533	32931	5.11451	1.4615	4.80044
587	33907	10081	32219	4.94632	1.39878	4.69665
588	33064	9651	31075	4.82334	1.33911	4.52988
589	32590	9742	30107	4.75419	1.35174	4.38878
590	31650	9300	29617	4.61707	1.29041	4.31735
591	29743	8706	28742	4.33888	1.20799	4.1898
592	29266	8166	27821	4.26929	1.13307	4.05554
593	27933	8140	26630	4.07484	1.12946	3.88192
594	26461	7950	25568	3.8601	1.10309	3.72711
595	25633	7557	24356	3.73931	1.04856	3.55044
596	24758	7521	23929	3.61167	1.04357	3.48819
597	24370	7280	22397	3.55507	1.01013	3.26487
598	22780	6663	21555	3.32312	0.924518	3.14213
599	21906	6389	20487	3.19562	0.886499	2.98644
600	21202	6103	19869	3.09292	0.846816	2.89636
601	20161	5919	18671	2.94106	0.821285	2.72172
602	18731	5637	17733	2.73246	0.782156	2.58499
603	17943	5197	16595	2.61751	0.721104	2.4191
604	17264	5093	15545	2.51845	0.706674	2.26603
605	16806	5014	15745	2.45164	0.695713	2.29519
606	15523	4799	15059	2.26448	0.66588	2.19519
607	15675	4775	14574	2.28665	0.66255	2.12449
608	14861	4470	14346	2.16791	0.62023	2.09125
609	14345	4442	12906	2.09263	0.616345	1.88134
610	13791	4088	13019	2.01182	0.567226	1.89781
611	13290	3994	11991	1.93873	0.554183	1.74796
612	12448	3922	11774	1.8159	0.544193	1.71633
613	12654	3801	11313	1.84595	0.527404	1.64913
614	12125	3706	10327	1.76878	0.514222	1.50539
615	11697	3562	10207	1.70635	0.494242	1.4879
616	10926	3373	10353	1.59387	0.468017	1.50918
617	10994	3251	9860	1.60379	0.451089	1.43732
618	10542	3355	9625	1.53786	0.46552	1.40306
619	10396	3252	10089	1.51656	0.451228	1.4707
620	10593	3351	9853	1.5453	0.464965	1.4363
621	10212	3005	9720	1.48972	0.416956	1.41691
622	9683	3525	8907	1.41255	0.489108	1.2984
623	9742	2965	9631	1.42115	0.411406	1.40394
624	9252	3166	8701	1.34967	0.439295	1.26837
625	9668	3200	8663	1.41036	0.444013	1.26283
626	9153	3295	8834	1.33523	0.457194	1.28776
627	8920	3185	8311	1.30124	0.441931	1.21152
628	8857	3464	9305	1.29205	0.480644	1.35641
629	8506	3326	8231	1.24085	0.461496	1.19985
630	9041	3252	8624	1.31889	0.451228	1.25714
631	8531	3280	8254	1.24449	0.455113	1.20321
632	8301	3575	8090	1.21094	0.496046	1.1793
633	8053	3496	7942	1.17476	0.485084	1.15773
634	8181	3426	7872	1.19344	0.475371	1.14752
635	7820	3714	7567	1.14077	0.515332	1.10306
636	7837	4191	7237	1.14325	0.581518	1.05496
637	7693	4011	7448	1.12225	0.556542	1.08571
638	7601	4110	6938	1.10883	0.570279	1.01137
639	7387	4413	7071	1.07761	0.612321	1.03076
640	7237	4930	7032	1.05573	0.684057	1.02507
641	6996	5321	6541	1.02057	0.73831	0.953499
642	6854	5442	6336	0.999854	0.755099	0.923615
643	7593	5884	6631	1.10766	0.816428	0.966618
644	7263	6354	6631	1.05952	0.881643	0.966618
645	6855	7207	6860	1	1	1
646	7661	7792	6586	1.11758	1.08117	0.960058
647	7320	8479	6792	1.06783	1.1765	0.990087
648	6939	9005	6686	1.01225	1.24948	0.974636
649	7089	9992	6980	1.03414	1.38643	1.01749
650	7387	10741	6759	1.07761	1.49036	0.985277
651	7636	11727	6469	1.11393	1.62717	0.943003
652	7664	12108	6636	1.11802	1.68003	0.967347
653	7114	13485	6820	1.03778	1.8711	0.994169
654	7764	14651	6884	1.1326	2.03288	1.0035
655	7851	15576	7235	1.1453	2.16123	1.05466
656	8072	16260	7170	1.17753	2.25614	1.04519
657	8128	17055	7187	1.1857	2.36645	1.04767
658	8435	18201	7260	1.23049	2.52546	1.05831
659	8142	19367	7226	1.18775	2.68725	1.05335
660	8736	20218	7552	1.2744	2.80533	1.10087
661	8598	20733	7443	1.25427	2.87679	1.08499
662	8492	21146	7711	1.2388	2.93409	1.12405
663	8670	21460	8064	1.26477	2.97766	1.17551
664	8822	22736	7249	1.28694	3.15471	1.05671
665	8601	22715	7331	1.2547	3.1518	1.06866
666	8338	22577	7825	1.21634	3.13265	1.14067
667	8601	23592	7726	1.2547	3.27348	1.12624
668	8072	22753	7077	1.17753	3.15707	1.03163
669	7948	22203	6997	1.15945	3.08075	1.01997
670	8281	23236	7354	1.20802	3.22409	1.07201
671	7710	21994	7009	1.12473	3.05176	1.02172
672	7306	21696	6658	1.06579	3.01041	0.970554
673	7434	21530	6519	1.08446	2.98737	0.950292
674	7015	20869	6381	1.02334	2.89566	0.930175
675	7141	20739	6557	1.04172	2.87762	0.955831
676	6882	20055	5963	1.00394	2.78271	0.869242
677	6469	19066	5348	0.943691	2.64548	0.779592
678	6253	18501	5408	0.912181	2.56709	0.788338
679	6227	17399	5328	0.908388	2.41418	0.776676
680	5766	16519	5743	0.841138	2.29208	0.837172
681	5416	15797	5048	0.79008	2.1919	0.73586
682	4961	14684	4454	0.723705	2.03746	0.649271
683	5002	14279	4594	0.729686	1.98127	0.669679
684	4879	13933	4262	0.711743	1.93326	0.621283
685	4287	13197	3965	0.625383	1.83114	0.577988
686	4238	12429	3678	0.618235	1.72457	0.536152
687	4315	11500	3212	0.629468	1.59567	0.468222
688	3972	10489	3474	0.579431	1.45539	0.506414
689	3660	10208	3537	0.533917	1.4164	0.515598
690	3345	9083	3134	0.487965	1.2603	0.456851
691	3304	8890	3041	0.481984	1.23352	0.443294
692	3140	8088	2850	0.45806	1.12224	0.415452
693	3042	7474	2584	0.443764	1.03705	0.376676
694	2872	7616	2399	0.418964	1.05675	0.349708
695	2752	6532	2554	0.401459	0.906341	0.372303
696	2534	6417	2160	0.369657	0.890384	0.314869
697	2535	5977	1944	0.369803	0.829333	0.283382
698	2575	5688	1998	0.375638	0.789233	0.291254
699	2318	5305	2069	0.338147	0.73609	0.301603
700	2033	5069	1948	0.296572	0.703344	0.283965
701	2130	5069	1681	0.310722	0.703344	0.245044
702	2051	4746	1606	0.299198	0.658526	0.234111
703	1834	4192	1598	0.267542	0.581657	0.232945
704	1759	4376	1517	0.256601	0.607187	0.221137
705	1488	3895	1727	0.217068	0.540447	0.251749
706	1424	3668	1343	0.207732	0.50895	0.195773
707	1508	3565	1412	0.219985	0.494658	0.205831
708	1492	3795	1099	0.217651	0.526571	0.160204
709	1615	3276	1302	0.235594	0.454558	0.189796
710	1325	2954	1393	0.19329	0.409879	0.203061
711	1455	3240	1400	0.212254	0.449563	0.204082
712	1256	3084	1349	0.183224	0.427917	0.196647
713	1435	2948	1072	0.209336	0.409047	0.156268
714	1192	3201	1236	0.173888	0.444152	0.180175
715	1055	2728	1263	0.153902	0.378521	0.184111
716	1154	2653	1038	0.168344	0.368114	0.151312
717	1153	2697	1001	0.168198	0.37422	0.145918
718	945	2641	1175	0.137856	0.366449	0.171283
719	1119	2567	843	0.163239	0.356181	0.122886
720	977	2671	896	0.142524	0.370612	0.130612
721	1069	2538	848	0.155945	0.352158	0.123615
722	1118	2653	930	0.163093	0.368114	0.135569
723	833	2541	804	0.121517	0.352574	0.117201
724	1051	2527	871	0.153319	0.350631	0.126968
725	904	2621	1047	0.131875	0.363674	0.152624
726	1017	2462	761	0.148359	0.341612	0.110933
727	909	2480	1006	0.132604	0.34411	0.146647
728	1110	2502	891	0.161926	0.347162	0.129883
729	988	2551	1037	0.144128	0.353961	0.151166
730	967	2294	839	0.141065	0.318302	0.122303
731	871	2432	989	0.127061	0.33745	0.144169
732	951	2450	1047	0.138731	0.339947	0.152624
733	806	2360	850	0.117578	0.327459	0.123907
734	957	2398	737	0.139606	0.332732	0.107434
735	839	2373	945	0.122392	0.329263	0.137755
736	939	2198	735	0.13698	0.304981	0.107143
737	955	2259	871	0.139314	0.313445	0.126968
738	765	2278	739	0.111597	0.316082	0.107726
739	769	2170	745	0.112181	0.301096	0.108601
740	715	2160	902	0.104303	0.299709	0.131487

## Sheet: App1_Figure_1b
Emission spectra of NADP-Snifit with NADP+, NADPH or no cofactor - NADP-Snifit does not close with NADPH
	Intensities (a.u.)			Normalized intensities (isosbestic point: 645 nm)
Wavel.	100 uM NADP+, 1 mM glucose-6-phosphate (before G6PDH conversion)	100 uM NADPH converted with G6PD pH 7.5	no cofactor	100 uM NADP+, 1 mM glucose-6-phosphate (before G6PDH conversion)	100 uM NADPH converted with G6PD pH 7.5	no cofactor
540	5127	6110	6091	0.589717	0.827465	0.888549
541	3879	4964	5261	0.44617	0.672264	0.767469
542	3254	4509	4621	0.374281	0.610645	0.674106
543	3134	4536	4383	0.360478	0.614301	0.639387
544	2982	4686	4733	0.342995	0.634615	0.690445
545	2838	4583	4753	0.326432	0.620666	0.693363
546	2938	4986	5314	0.337934	0.675244	0.775201
547	2720	5435	5510	0.312859	0.736051	0.803793
548	2950	5922	5669	0.339314	0.802004	0.826988
549	3370	6311	6855	0.387624	0.854686	1
550	3725	7186	7343	0.428456	0.973185	1.07119
551	4033	7868	7805	0.463883	1.06555	1.13858
552	4266	8578	8929	0.490683	1.1617	1.30255
553	4692	9485	9868	0.539683	1.28453	1.43953
554	4923	10685	10757	0.566253	1.44705	1.56922
555	5287	11792	12258	0.608121	1.59697	1.78818
556	6130	13097	12790	0.705084	1.7737	1.86579
557	6661	14337	14274	0.766161	1.94163	2.08228
558	6798	15544	15829	0.781919	2.10509	2.30912
559	7655	16561	17363	0.880492	2.24282	2.5329
560	8047	17754	18562	0.925581	2.40439	2.7078
561	8491	19788	19926	0.976651	2.67985	2.90678
562	9385	21174	21733	1.07948	2.86755	3.17039
563	9654	22594	23455	1.11042	3.05986	3.42159
564	10271	24192	24159	1.18139	3.27627	3.52429
565	11435	25816	26519	1.31527	3.49621	3.86856
566	11781	26810	27985	1.35507	3.63082	4.08242
567	12311	28351	29243	1.41603	3.83952	4.26594
568	12847	30313	30540	1.47769	4.10523	4.45514
569	12693	30919	32463	1.45997	4.1873	4.73567
570	13719	31713	33102	1.57798	4.29483	4.82888
571	14009	33535	34118	1.61134	4.54158	4.9771
572	13988	34083	35023	1.60893	4.61579	5.10912
573	14480	34685	36413	1.66552	4.69732	5.31189
574	14669	35815	37158	1.68726	4.85035	5.42057
575	14756	36022	38585	1.69726	4.87839	5.62874
576	14709	36473	37512	1.69186	4.93946	5.47221
577	14691	36536	38034	1.68979	4.948	5.54836
578	14940	36335	38199	1.71843	4.92077	5.57243
579	14366	36842	38142	1.6524	4.98944	5.56411
580	14999	37096	38607	1.72521	5.02384	5.63195
581	14189	36813	37245	1.63205	4.98551	5.43326
582	14273	35897	37414	1.64171	4.86146	5.45791
583	14653	35024	36933	1.68542	4.74323	5.38775
584	14068	34992	36965	1.61813	4.73889	5.39241
585	13800	34467	35231	1.5873	4.6678	5.13946
586	13355	33737	35060	1.53612	4.56893	5.11451
587	12995	33077	33907	1.49471	4.47955	4.94632
588	12579	31811	33064	1.44686	4.3081	4.82334
589	12507	30593	32590	1.43858	4.14315	4.75419
590	12078	30242	31650	1.38923	4.09561	4.61707
591	11557	28971	29743	1.32931	3.92348	4.33888
592	10557	28087	29266	1.21429	3.80376	4.26929
593	10386	26736	27933	1.19462	3.6208	4.07484
594	10677	26084	26461	1.22809	3.5325	3.8601
595	9864	24618	25633	1.13458	3.33397	3.73931
596	9383	23774	24758	1.07925	3.21966	3.61167
597	9357	22782	24370	1.07626	3.08532	3.55507
598	8818	21707	22780	1.01426	2.93973	3.32312
599	8350	20725	21906	0.960432	2.80674	3.19562
600	8533	19905	21202	0.981481	2.69569	3.09292
601	7370	18776	20161	0.847711	2.5428	2.94106
602	7062	17951	18731	0.812284	2.43107	2.73246
603	7285	17447	17943	0.837934	2.36281	2.61751
604	7038	16977	17264	0.809524	2.29916	2.51845
605	6390	15939	16806	0.73499	2.15859	2.45164
606	6171	15290	15523	0.7098	2.07069	2.26448
607	6159	15057	15675	0.70842	2.03914	2.28665
608	5802	14095	14861	0.667357	1.90886	2.16791
609	5575	13375	14345	0.641247	1.81135	2.09263
610	5414	13341	13791	0.622728	1.80674	2.01182
611	5298	12796	13290	0.609386	1.73294	1.93873
612	5072	12334	12448	0.583391	1.67037	1.8159
613	4881	11738	12654	0.561422	1.58965	1.84595
614	4604	11716	12125	0.529561	1.58667	1.76878
615	4722	11422	11697	0.543133	1.54686	1.70635
616	4640	10795	10926	0.533701	1.46194	1.59387
617	4491	10559	10994	0.516563	1.42998	1.60379
618	4291	10162	10542	0.493559	1.37622	1.53786
619	4380	9966	10396	0.503796	1.34967	1.51656
620	4419	9844	10593	0.508282	1.33315	1.5453
621	4135	9683	10212	0.475615	1.31135	1.48972
622	4273	9683	9683	0.491488	1.31135	1.41255
623	4287	9497	9742	0.493099	1.28616	1.42115
624	4246	9327	9252	0.488383	1.26314	1.34967
625	4307	8708	9668	0.495399	1.17931	1.41036
626	4113	8910	9153	0.473085	1.20666	1.33523
627	4063	8606	8920	0.467334	1.16549	1.30124
628	4274	8352	8857	0.491603	1.13109	1.29205
629	4310	8670	8506	0.495744	1.17416	1.24085
630	4146	8262	9041	0.476881	1.11891	1.31889
631	3956	8292	8531	0.455026	1.12297	1.24449
632	4374	8020	8301	0.503106	1.08613	1.21094
633	4394	7840	8053	0.505406	1.06176	1.17476
634	4491	7770	8181	0.516563	1.05228	1.19344
635	4758	7723	7820	0.547274	1.04591	1.14077
636	4854	7959	7837	0.558316	1.07787	1.14325
637	5244	7651	7693	0.603175	1.03616	1.12225
638	5466	7203	7601	0.628709	0.975488	1.10883
639	5343	7257	7387	0.614562	0.982801	1.07761
640	6025	7336	7237	0.693007	0.993499	1.05573
641	6395	7015	6996	0.735565	0.950027	1.02057
642	7015	7121	6854	0.806878	0.964382	0.999854
643	7289	7173	7593	0.838394	0.971425	1.10766
644	8029	7596	7263	0.92351	1.02871	1.05952
645	8694	7384	6855	1	1	1
646	9342	7278	7661	1.07453	0.985645	1.11758
647	10063	7673	7320	1.15746	1.03914	1.06783
648	11446	7122	6939	1.31654	0.964518	1.01225
649	12004	7600	7089	1.38072	1.02925	1.03414
650	12666	7752	7387	1.45687	1.04984	1.07761
651	14292	7820	7636	1.64389	1.05905	1.11393
652	15084	8010	7664	1.73499	1.08478	1.11802
653	16472	8660	7114	1.89464	1.17281	1.03778
654	17515	8305	7764	2.01461	1.12473	1.1326
655	18111	8921	7851	2.08316	1.20815	1.1453
656	19680	8894	8072	2.26363	1.2045	1.17753
657	20729	8937	8128	2.38429	1.21032	1.1857
658	22001	9316	8435	2.5306	1.26165	1.23049
659	23347	9542	8142	2.68542	1.29225	1.18775
660	23683	9797	8736	2.72406	1.32679	1.2744
661	24851	9804	8598	2.85841	1.32774	1.25427
662	25565	9701	8492	2.94053	1.31379	1.2388
663	25911	9762	8670	2.98033	1.32205	1.26477
664	26389	10257	8822	3.03531	1.38908	1.28694
665	27194	9967	8601	3.1279	1.34981	1.2547
666	26859	10356	8338	3.08937	1.40249	1.21634
667	27370	9814	8601	3.14815	1.32909	1.2547
668	27621	10141	8072	3.17702	1.37337	1.17753
669	27268	9755	7948	3.13642	1.3211	1.15945
670	26271	9258	8281	3.02174	1.25379	1.20802
671	27381	9484	7710	3.14941	1.2844	1.12473
672	26448	9165	7306	3.0421	1.2412	1.06579
673	24347	8645	7434	2.80044	1.17077	1.08446
674	24969	8178	7015	2.87198	1.10753	1.02334
675	24090	8408	7141	2.77088	1.13868	1.04172
676	23126	8107	6882	2.66	1.09791	1.00394
677	23061	7816	6469	2.65252	1.0585	0.943691
678	21874	7383	6253	2.51599	0.999865	0.912181
679	21534	7212	6227	2.47688	0.976706	0.908388
680	19130	6601	5766	2.20037	0.89396	0.841138
681	18526	6466	5416	2.13089	0.875677	0.79008
682	17907	6102	4961	2.0597	0.826381	0.723705
683	16739	5873	5002	1.92535	0.795368	0.729686
684	15927	5423	4879	1.83195	0.734426	0.711743
685	14985	5538	4287	1.7236	0.75	0.625383
686	14771	5468	4238	1.69899	0.74052	0.618235
687	13396	4961	4315	1.54083	0.671858	0.629468
688	13018	4709	3972	1.49735	0.63773	0.579431
689	11803	4336	3660	1.3576	0.587216	0.533917
690	11246	4149	3345	1.29354	0.561891	0.487965
691	10822	3656	3304	1.24477	0.495125	0.481984
692	9943	3740	3140	1.14366	0.506501	0.45806
693	9200	3519	3042	1.0582	0.476571	0.443764
694	8957	3309	2872	1.03025	0.448131	0.418964
695	8076	3092	2752	0.928916	0.418743	0.401459
696	8171	2964	2534	0.939844	0.401408	0.369657
697	7294	2954	2535	0.838969	0.400054	0.369803
698	6415	2394	2575	0.737865	0.324215	0.375638
699	6310	2487	2318	0.725788	0.336809	0.338147
700	6485	2563	2033	0.745917	0.347102	0.296572
701	5715	2374	2130	0.65735	0.321506	0.310722
702	5823	2037	2051	0.669772	0.275867	0.299198
703	5202	2053	1834	0.598344	0.278034	0.267542
704	4562	1973	1759	0.52473	0.267199	0.256601
705	5365	1842	1488	0.617092	0.249458	0.217068
706	4710	1719	1424	0.541753	0.232801	0.207732
707	4333	1618	1508	0.49839	0.219122	0.219985
708	4158	1818	1492	0.478261	0.246208	0.217651
709	4254	1694	1615	0.489303	0.229415	0.235594
710	3931	1642	1325	0.452151	0.222373	0.19329
711	4040	1496	1455	0.464688	0.2026	0.212254
712	3848	1556	1256	0.442604	0.210726	0.183224
713	3742	1520	1435	0.430412	0.20585	0.209336
714	3623	1238	1192	0.416724	0.16766	0.173888
715	3532	1427	1055	0.406257	0.193256	0.153902
716	3265	1475	1154	0.375546	0.199756	0.168344
717	3180	1273	1153	0.365769	0.1724	0.168198
718	3472	1204	945	0.399356	0.163055	0.137856
719	3156	1356	1119	0.363009	0.18364	0.163239
720	3088	1199	977	0.355187	0.162378	0.142524
721	2944	1181	1069	0.338624	0.15994	0.155945
722	2993	1179	1118	0.34426	0.15967	0.163093
723	3175	1094	833	0.365194	0.148158	0.121517
724	3167	1115	1051	0.364274	0.151002	0.153319
725	2748	1031	904	0.31608	0.139626	0.131875
726	2869	1048	1017	0.329998	0.141928	0.148359
727	2865	1052	909	0.329538	0.14247	0.132604
728	3012	1169	1110	0.346446	0.158315	0.161926
729	2778	1144	988	0.319531	0.15493	0.144128
730	2804	1254	967	0.322521	0.169827	0.141065
731	2965	952	871	0.34104	0.128927	0.127061
732	3010	1146	951	0.346216	0.1552	0.138731
733	2648	1001	806	0.304578	0.135563	0.117578
734	2899	1013	957	0.333448	0.137189	0.139606
735	2567	1045	839	0.295261	0.141522	0.122392
736	2911	953	939	0.334829	0.129063	0.13698
737	2726	906	955	0.31355	0.122698	0.139314
738	2937	1001	765	0.337819	0.135563	0.111597
739	2762	999	769	0.31769	0.135293	0.112181
740	2494	943	715	0.286865	0.127709	0.104303
