# Supplementary material for: Semisynthetic biosensors for mapping cellular concentrations of nicotinamide adenine dinucleotides
Source: eLife. 2018 May 29;7:e32638. doi: 10.7554/eLife.32638 (PMC5990361; doi:10.7554/eLife.32638)
Supplement: Appendix 1—figure 1—source data 2. [file elife-32638-app1-fig1-data2.xlsx]

## Sheet: App_Figure_1c
Titrations of NAD-Snifit with NAD+ at different pH
	pH 6.8		pH 7		pH 7.2		pH 7.5		pH 8
[NAD+] (M)	Ratio (TMR/SiR)	SD	Ratio (TMR/SiR)	SD	Ratio (TMR/SiR)	SD	Ratio (TMR/SiR)	SD	Ratio (TMR/SiR)	SD
0.02	0.516989	0.0185089	0.536617	0.0149865	0.560616	0.0121592	0.609735	0.0196046	0.642409	0.0176108
0.002	0.57464	0.00563034	0.598918	0.0176293	0.672549	0.0294067	0.730594	0.00886425	0.802603	0.0131797
0.0004	0.735524	0.0176123	0.836248	0.0356044	0.928714	0.0380152	1.12864	0.0170179	1.22619	0.0320438
8e-05	1.21759	0.0228963	1.41733	0.0709862	1.7172	0.0638124	2.21001	0.0744293	2.2863	0.0376622
1.6e-05	2.40878	0.142768	2.59242	0.141407	3.04052	0.0384353	3.41574	0.0643257	3.69508	0.10751
3.2e-06	3.25179	0.0506325	3.53581	0.0550311	3.84062	0.172204	4.25098	0.152737	4.43275	0.120234
3.2e-07	3.67561	0.13031	3.98477	0.192766	4.21421	0.188648	4.38973	0.191222	4.57801	0.0376447
3.2e-08	3.77157	0.0292534	4.02564	0.18786	4.32685	0.183564	4.65332	0.13816	4.67097	0.165085
Normalization
[NAD+] (M)	Norm. Ratio (TMR/SiR)	SD	Norm. Ratio (TMR/SiR)	SD	Norm. Ratio (TMR/SiR)	SD	Norm. Ratio (TMR/SiR)	SD	Norm. Ratio (TMR/SiR)	SD
0.02	1	0.0358013	1	0.0279278	1	0.0216889	1	0.0321526	1	0.0274137
0.002	1.11151	0.0108906	1.1161	0.0328527	1.19966	0.0524541	1.19822	0.0145379	1.24936	0.0205161
0.0004	1.42271	0.0340671	1.55837	0.0663498	1.65659	0.0678096	1.85103	0.0279103	1.90873	0.0498808
8e-05	2.35516	0.0442878	2.64123	0.132285	3.06305	0.113825	3.62454	0.122068	3.55895	0.0586265
1.6e-05	4.65925	0.276152	4.83105	0.263517	5.42354	0.068559	5.60201	0.105498	5.75192	0.167355
3.2e-06	6.28986	0.0979374	6.58907	0.102552	6.85071	0.307168	6.97186	0.250497	6.9002	0.187161
3.2e-07	7.10966	0.252056	7.42573	0.359224	7.51709	0.336501	7.19942	0.313616	7.12632	0.0585993
3.2e-08	7.29527	0.0565842	7.5019	0.350083	7.71803	0.327433	7.63172	0.22659	7.27103	0.256978

## Sheet: pH 6.8
Titrations of NAD-Snifit with NAD+, pH 6.8, 25°C
Wavel. (nm)	540	541	542	543	544	545	546	547	548	549	550	551	552	553	554	555	556	557	558	559	560	561	562	563	564	565	566	567	568	569	570	571	572	573	574	575	576	577	578	579	580	581	582	583	584	585	586	587	588
A1	5794	4885	3513	2914	2650	1933	2041	2032	2146	2064	2150	2478	2547	2776	3272	3311	3858	4326	4466	4688	5454	5678	6154	6852	7057	7771	8404	8790	9121	9250	9539	10285	10579	10501	11130	11300	11247	11137	11918	11568	11219	11648	11486	11692	11417	11084	11070	10982	9777
A2	6370	4783	3299	2851	2401	2115	1986	2072	2055	2082	2255	2440	2431	2811	3191	3533	3800	4125	4864	5318	5283	5848	6350	6713	7377	7989	8383	9244	9306	9594	10146	10503	10468	11271	11270	11488	11981	11717	11714	11073	12405	11963	11559	11912	11347	11150	11432	11260	10401
A3	5789	4521	3660	3036	2226	2329	1901	1786	2068	2325	2343	2048	2562	2805	3140	3455	4155	4181	4602	5150	5668	6281	6850	6847	7594	7970	8667	9068	9341	9854	10396	10740	10935	11945	11705	11814	11535	12078	12525	12441	12282	11676	12024	12204	11644	11103	11384	10813	10647
B1	6127	4805	3332	2725	2467	2184	1961	1922	1931	2052	2644	2214	2784	3060	3227	3708	4098	4360	5150	5360	5680	6519	7060	7485	7915	8893	8705	9859	9878	10861	11419	11107	12016	12395	12383	12497	13064	13219	13369	12952	12754	12957	12365	12872	12679	12015	12484	11352	11051
B2	6219	4613	3285	2927	2494	2360	2108	1807	2027	2196	2073	2653	2663	2905	3181	3447	4081	4397	4837	5132	5762	6500	7268	7109	8327	8323	8993	10210	10130	10693	10987	11066	12224	11894	12183	12796	12622	12944	13245	13098	12055	13093	13206	12413	12711	12003	11630	11655	11430
B3	6031	4819	3562	2716	2493	2128	2162	2001	2005	2117	2394	2471	2924	3130	3626	3675	4177	4533	5058	5706	5611	6589	7342	7596	7917	8914	9364	10181	10163	10718	11477	11461	11957	12775	12887	12903	13492	13194	13203	13009	13677	12552	12861	12268	12154	11970	11753	12133	11156
C1	6111	4625	3491	2546	2367	2313	2117	1988	2163	2078	2424	2767	2802	3603	3799	4016	4541	5019	5327	6423	6997	7497	8638	8443	9545	9872	10402	11693	11986	12560	12897	13308	14244	14625	14319	14745	14960	14998	15475	15267	15490	15347	14877	14844	14991	14455	14238	13582	12918
C2	6273	4532	3480	2981	2603	2383	2146	2079	1946	2421	2854	2879	3211	3459	3840	4335	4981	5199	5882	6484	6850	7947	8540	8933	9669	10558	11056	12162	11573	12815	13003	13846	14473	14848	15065	15366	15751	15601	16126	15373	15848	15772	15827	15299	14861	14528	14836	14741	13540
C3	6063	4625	3336	2772	2569	2243	2427	2189	2261	2557	2847	2887	3110	3616	3522	4148	4583	5495	5607	6181	6466	7662	8164	8840	9769	10057	10719	11941	11943	12406	13304	14196	14226	14148	15441	15428	15200	15498	16082	15636	15653	15642	15830	15227	14590	14529	14436	13136	13428
D1	6104	5206	3438	2998	2845	2673	2523	2436	2730	2883	3239	3590	3874	5012	5249	5466	6714	6786	8367	8852	9529	10563	11376	12091	13356	14218	15420	15681	16635	17470	18387	19532	19347	20647	20992	21329	22415	21900	22144	22307	22714	21989	21957	22176	21073	20336	20512	19979	19269
D2	6542	4777	3429	3138	2541	2356	2471	2441	2597	2805	3183	3582	4028	4503	5020	5635	6384	6701	7370	8351	9856	9780	11374	12332	13171	13927	15429	15972	16231	16982	18333	19331	19402	19848	20805	21648	21908	21533	22379	22018	22031	22620	22001	21971	20759	20819	20770	20037	18868
D3	6309	4425	3598	3141	2876	2677	2556	2336	2604	3112	3248	3542	4002	4202	5060	5514	6225	6920	7798	8968	8828	10108	10598	12024	12529	14029	15026	15720	16649	17078	18360	19278	18910	20352	20879	21672	21103	21587	22041	21774	21903	21437	21774	20359	21580	20245	19880	19302	18641
E1	6534	5025	3838	3404	2984	2982	2832	3385	3402	3569	4482	4738	5668	5905	6313	7183	8111	8931	10499	12071	12647	13746	14713	15677	17217	19388	19889	22154	22712	23841	26036	25976	26840	28788	28426	28883	30294	29713	31371	31419	30656	30173	30787	30528	29476	28383	28013	28348	26917
E2	6211	4858	3617	3332	3077	2798	3022	2998	3341	3569	4136	4546	5046	5949	6466	7338	8402	9028	10363	11253	12553	13929	15158	16415	17840	18983	20428	21935	23190	24070	25191	26690	26809	28638	29626	29242	29819	30636	31032	30730	31005	30360	30461	29980	29433	28166	29015	28132	26875
E3	6549	4869	3999	3317	3275	2792	3212	3310	3450	3897	4251	4517	5361	5896	6356	7162	8501	8903	10032	11680	12498	14033	15132	16520	18266	19785	20754	21881	22762	24046	26037	27127	27802	29027	29426	29168	30179	31816	30660	30734	31171	30932	30728	30413	30188	29646	27800	28165	27775
F1	6512	5255	3897	3596	2943	3225	3344	3693	3480	4185	4713	5315	5598	6809	7272	8453	9407	10198	11781	12734	14579	15977	17113	18819	20716	22620	23263	25355	26816	28874	29234	29765	32234	32226	33070	33429	34250	35163	34436	35236	34622	35467	34235	34440	33634	33287	33349	32003	29743
F2	6376	4808	3782	3683	3413	3213	3009	3624	3630	4227	4284	5092	5858	7233	7626	8740	9745	10070	11959	12851	14050	15931	17519	18811	20510	21732	23277	24773	25883	27293	28921	30718	31645	31971	33021	33293	34062	34932	34884	35823	35603	34611	35167	34300	33874	33342	33014	31714	30973
F3	6574	5115	4159	3452	3322	3093	3107	3338	3715	4410	4525	5581	5988	7097	7164	8188	9380	10715	11695	13077	14581	15910	17425	18399	19767	22482	23575	25163	25810	27728	29007	29955	31430	32183	33139	34657	34764	34704	34837	36034	34629	35923	35034	34788	33726	33314	33755	31439	31058
G1	6368	4706	4066	3496	3253	3016	3411	3315	3765	4220	4722	5246	5911	7376	7838	8859	9537	10857	12676	13870	14621	16412	17506	19806	21678	22531	24269	26190	27100	28971	29862	31038	33719	33925	33595	35935	36413	36211	36631	36695	36852	35837	37376	36325	34297	34230	33396	33487	32624
G2	6436	4993	3896	3389	3280	3085	3411	3651	3716	4347	4755	5525	6195	7000	7426	8539	9764	10645	12115	12950	15038	16516	17649	19167	21159	23156	24465	25476	26513	28371	30082	31898	31889	33166	34054	35409	35504	36090	36429	37040	37367	36431	36378	35368	34761	34985	33529	32121	33125
G3	6930	4903	3770	3265	3254	2989	3475	3453	3832	4499	4848	5163	5804	6834	7583	8851	9474	11191	12394	12652	14641	16303	17725	19092	21358	22963	23907	25310	27812	28703	30393	30668	32631	33814	34404	34862	35772	35863	36056	38061	36431	35756	36738	35292	34747	34934	34447	32348	31464
H1	6636	4940	4161	3382	3271	3277	3199	3880	4112	4290	4922	5019	6144	7120	8404	9005	10567	11025	12968	13937	14187	16530	17872	19807	20524	23362	24142	25841	27184	29101	30906	31141	32871	33941	35498	35539	36372	36643	36982	37796	37000	36831	36964	35645	35320	35104	34089	33985	32808
H2	6436	4949	4041	3723	3362	3119	3427	3546	4043	4460	4902	5631	6532	7386	7604	9362	9892	11047	12663	14052	14872	16916	17993	19690	21817	22473	24852	26313	28125	29769	30901	32520	33572	34028	35529	36634	37660	37059	39442	37556	37695	37354	37500	35785	35893	35823	35285	34042	32797
H3	6420	5341	4271	3870	3529	3330	3331	3746	3839	4401	4651	5395	5960	7648	7988	8622	10779	11573	12722	14402	15609	16256	18970	20189	22158	24055	25357	27011	27965	29744	31259	32865	33524	35322	36074	36274	37353	37260	38307	37679	37536	37439	37139	37122	37125	35771	36095	33471	32962
															TMR int.	SiR int.	Ratio (TMR/SIR)			[NAD+] (M)	Mean Ratio (TMR/SIR)	SD
														A1	11137	22471	0.495617			0.02	0.516989	0.0185089
														A2	11717	22207	0.527626			0.002	0.57464	0.00563034
														A3	12078	22887	0.527723			0.0004	0.735524	0.0176123
														B1	13219	23267	0.568144			8e-05	1.21759	0.0228963
														B2	12944	22407	0.577677			1.6e-05	2.40878	0.142768
														B3	13194	22823	0.578101			3.2e-06	3.25179	0.0506325
														C1	14998	19845	0.755757			3.2e-07	3.67561	0.13031
														C2	15601	21454	0.727184			3.2e-08	3.77157	0.0292534
														C3	15498	21417	0.723631
														D1	21900	17766	1.23269
														D2	21533	18076	1.19125
														D3	21587	17567	1.22884
														E1	29713	13101	2.26799
														E2	30636	12739	2.4049
														E3	31816	12460	2.55345
														F1	35163	10787	3.25976
														F2	34932	10592	3.29796
														F3	34704	10853	3.19764
														G1	36211	10239	3.53658
														G2	36090	9510	3.79495
														G3	35863	9705	3.69531
														H1	36643	9789	3.74328
														H2	37059	9748	3.8017
														H3	37260	9884	3.76973
[truncated: 152 more columns]

## Sheet: pH 7.0
Titrations of NAD-Snifit with NAD+, pH 7.0, 25°C
Wavel. (nm)	540	541	542	543	544	545	546	547	548	549	550	551	552	553	554	555	556	557	558	559	560	561	562	563	564	565	566	567	568	569	570	571	572	573	574	575	576	577	578	579	580	581	582	583	584	585	586	587	588
A4	6314	4527	3488	3019	2666	2453	1976	2012	2103	2136	2223	2246	2587	2886	3474	3840	4019	4455	4839	5427	5712	6381	6878	7318	7770	8757	8933	9497	10116	10739	10511	11430	11734	11667	12101	12087	12197	12450	13042	12680	12294	12738	12094	11696	11950	11890	11784	11031	11104
A5	6259	4754	3544	2948	2390	2301	2036	2189	2161	2242	2498	2310	2912	3181	3351	3842	3748	4759	4889	5334	5794	6644	6945	7339	8247	8720	9106	9836	10914	11121	11405	11889	11876	12694	12249	12702	12792	12864	13561	13499	12874	12649	12855	12959	12368	12471	12311	11649	11463
A6	6871	4856	3520	2778	2338	2323	2319	2274	2243	2327	2532	2658	2897	2967	3432	3653	4311	4657	5136	5612	5900	6353	6692	7339	8355	8110	9144	9602	10301	10588	11095	11832	11473	12147	11884	12382	12394	12900	13013	12579	12757	13102	13038	12774	12581	11870	11449	11673	11299
B4	6401	4762	3478	3171	2495	1881	2030	2157	1985	2255	2478	2589	2891	3285	3411	3988	4493	4783	5452	5729	6374	6978	7254	7895	8899	9433	9305	10644	10838	11432	12348	12347	12820	13818	14112	14066	13573	13872	13951	14510	14301	14236	14392	13179	13652	13232	12856	12599	12338
B5	6118	4330	3477	2915	2519	2098	2264	2031	2003	2158	2361	2489	2931	2966	3590	4157	4234	5051	5394	5842	6556	6683	7660	8251	8959	9311	10032	10675	11264	11260	11858	12703	12422	12639	13319	13912	14340	14225	14357	14618	13984	13790	14467	14006	13675	13641	12590	12744	11892
B6	6555	4356	3527	2628	2433	2177	1954	2260	2145	2211	2612	2781	2738	3335	3671	4245	4374	4883	5280	5730	6382	6979	7745	8450	8519	9009	10114	10644	10904	11340	12426	12857	13023	13242	13408	14168	13680	13825	14088	14367	13779	14106	14554	14036	13194	13237	13208	12900	11934
C4	6241	4865	3543	2845	2712	2288	2351	2298	2444	2540	2642	3027	3308	3960	4216	4506	4936	5819	6267	6915	7560	7974	9016	9359	10535	11627	11619	13146	13628	14410	14541	14690	15586	16397	16600	16607	17054	17447	18406	17787	17020	17358	16428	16628	16788	16412	16530	15691	14925
C5	6228	4473	3553	2820	2947	2425	2367	2377	2425	2516	2742	2920	3034	3904	3956	4666	5132	5694	6255	6894	7526	8311	8909	9528	10596	11341	12080	12558	13508	13777	15094	15080	16131	15935	16424	16977	17346	17080	16967	17729	17727	17665	17247	16413	16259	16253	16046	15752	14594
C6	6204	4772	3662	3123	2760	2516	2202	2393	2313	2383	2825	3019	3406	3902	4077	4733	5421	5689	6229	6767	7040	8317	9684	9558	10441	11104	11835	12718	13548	13686	14553	14336	15561	16199	16404	16452	16882	17645	17457	17177	16875	16965	17324	17047	15601	16264	15458	16379	14788
D4	6373	5072	3700	3273	2897	2635	2580	2790	3024	3146	3373	3555	4030	4891	5310	6108	7026	7500	8823	9197	10368	10761	12169	12900	14981	15156	15802	17767	18137	19942	19945	20884	21993	22439	22852	22901	23301	24359	23750	24223	24533	23279	24452	23454	23381	22977	22387	22102	21213
D5	6681	4853	3799	3367	3115	2627	2746	2582	2829	3210	3480	3936	4521	5003	5539	6377	7040	7181	8986	9330	10409	11870	12270	13062	14559	16206	16791	17710	18357	19599	21075	20715	21971	22541	23106	23511	23314	24350	25253	24414	24735	24915	24572	23643	23725	22962	22691	22769	21529
D6	6227	4859	3811	2975	2840	2726	2719	2778	2864	3383	3341	3809	4513	4868	5331	6082	7206	7406	8546	9369	10082	11431	12474	13185	14079	14955	16227	17496	18360	19358	20124	20677	21932	22396	23088	22935	23819	23958	23807	24912	24405	24367	24670	23449	22817	22678	22450	21654	21229
E4	6645	4984	4481	3458	3199	2900	3074	3412	3484	3943	4270	4974	5373	6170	6972	7715	8900	9952	11130	12544	13227	14874	15985	17185	18746	21608	22166	23952	24644	25714	27320	28158	29394	30475	30411	32456	32310	31655	32842	33410	33582	33501	33086	32225	31431	31048	30032	28590	29101
E5	6695	5123	3935	3667	3153	2967	3059	3363	3438	3748	4715	4763	5072	6245	7117	8565	9487	9881	10833	12281	13367	15289	16285	17538	19438	21074	22528	23176	24120	25785	27382	28178	29575	31206	31245	31404	31942	32391	33335	33801	32798	33076	33343	32839	31918	31666	30179	29586	29306
E6	7100	5134	4092	3637	3138	3056	3001	3523	3761	3916	4363	4849	5639	6458	7415	8002	9304	9533	10774	12270	13361	14704	16335	17649	19284	21058	21502	24111	23768	25461	26455	28776	29311	30585	30736	31541	31481	32123	32261	32813	33896	33261	32909	32212	32097	31046	31288	29401	29677
F4	6445	5346	3992	3737	3450	3426	3377	3541	4028	4280	4994	5213	5579	6708	7578	8459	9714	10813	11914	14491	14736	16760	18460	19605	21120	22775	24459	25808	27231	28529	30800	31148	32843	33524	35673	35564	35109	36049	36926	36927	36888	37310	35793	36068	35081	35592	35107	32878	31685
F5	6731	4898	4191	3528	3166	3470	3174	3535	3949	4376	4836	5663	6390	6634	7931	9162	10559	10795	12449	13448	15992	16678	17999	19753	21619	24806	24812	26087	27741	29346	30599	32317	33645	34164	34900	36303	36902	37144	37555	38005	36893	36759	37424	37288	36216	35182	34128	32977	32235
F6	6464	4959	3851	3709	3231	3153	3745	3437	4005	4338	4995	5159	6393	7201	8031	8783	9909	11059	12883	13805	14921	17274	18242	19227	22025	24002	25215	26293	28031	28906	30556	31107	33158	33892	35596	35774	36906	37209	37996	37110	38186	37632	36937	36695	37504	34499	34709	33571	33062
G4	6694	4676	3814	3809	3425	3325	3155	3588	3872	4305	4889	5266	6390	7323	7763	9029	10289	11376	12693	14037	14711	17275	17596	20569	21588	23784	25421	26980	28562	30073	31309	32609	34220	35508	35713	36092	36903	37231	37633	37693	38193	38331	38463	36596	36315	36257	35924	34839	32890
G5	6678	4997	4013	3486	3076	3599	3495	3867	3830	4570	4836	5320	6052	7564	8142	9178	10626	11393	12932	13722	15378	17646	19070	19505	21625	23936	24648	26770	27411	30699	30559	32362	34201	35383	36144	36604	36597	37611	37939	38742	37666	37890	37738	37119	36879	35461	35127	34851	32549
G6	6861	5085	4118	3521	3544	3323	3425	3821	3869	4498	5053	5358	6121	7398	7940	9546	10869	11794	12972	14573	15978	17713	18669	20513	22806	24298	25565	26682	29213	30743	31574	33446	34136	35065	35912	37089	37855	37973	38420	38083	38064	37440	38289	37330	36232	36189	35714	34900	34286
H4	6817	4780	4294	3472	3474	3566	3681	3852	3859	4465	5361	5927	6692	7896	8501	9610	11170	11692	13339	14391	16070	18135	19059	20926	23178	24699	26078	27470	29477	32534	32245	34729	35669	36995	37564	38675	38929	39064	39924	39537	40676	39666	39814	38295	38156	38146	37905	36569	35324
H5	6295	4951	4117	3634	3359	3197	3483	3665	4114	4407	5155	5637	6397	7362	8392	9563	10531	11612	13845	13938	15526	17994	18852	21100	22003	24762	26805	27893	29156	31550	32709	34131	35504	36964	36262	37788	39112	39228	39570	38917	39532	39031	39784	39017	37554	38291	36758	36441	34345
H6	6254	4936	4284	3567	3535	3369	3337	3787	4120	4392	5069	5492	6526	7132	7856	9663	10506	11448	12993	13450	15560	16884	18915	19736	21926	24168	25532	26634	28404	30153	31550	33278	34634	35376	35237	37054	37859	38113	38654	37643	38960	38453	37557	36579	36779	36499	34476	34245	33413
															TMR int.	SiR int.	Ratio (TMR/SIR)			[NAD+] (M)	Mean Ratio (TMR/SIR)	SD
														A4	12450	23105	0.538844			0.02	0.536617	0.0149865
														A5	12864	24708	0.520641			0.002	0.598918	0.0176293
														A6	12900	23439	0.550365			0.0004	0.836248	0.0356044
														B4	13872	23619	0.587324			8e-05	1.41733	0.0709862
														B5	14225	24101	0.590224			1.6e-05	2.59242	0.141407
														B6	13825	22327	0.619205			3.2e-06	3.53581	0.0550311
														C4	17447	21213	0.822467			3.2e-07	3.98477	0.192766
														C5	17080	21097	0.809594			3.2e-08	4.02564	0.18786
														C6	17645	20127	0.876683
														D4	24359	16341	1.49067
														D5	24350	18051	1.34896
														D6	23958	16963	1.41237
														E4	31655	12967	2.4412
														E5	32391	12388	2.61471
														E6	32123	11804	2.72137
														F4	36049	10221	3.52695
														F5	37144	10656	3.48574
														F6	37209	10351	3.59473
														G4	37231	9536	3.90426
														G5	37611	9781	3.84531
														G6	37973	9031	4.20474
														H4	39064	10256	3.80889
														H5	39228	9472	4.14147
														H6	38113	9236	4.12657
[truncated: 152 more columns]

## Sheet: pH 7.2
Titrations of NAD-Snifit with NAD+, pH 7.2, 25°C
Wavel. (nm)	540	541	542	543	544	545	546	547	548	549	550	551	552	553	554	555	556	557	558	559	560	561	562	563	564	565	566	567	568	569	570	571	572	573	574	575	576	577	578	579	580	581	582	583	584	585	586	587	588
A7	6244	4916	3447	2971	2370	2167	2022	2294	2229	2263	2520	2543	2898	3345	3418	3911	4634	4422	5012	5896	5904	6485	7359	7524	8049	8725	8804	9743	10430	10564	11092	10957	12289	13047	12477	13215	13055	12858	13185	13352	13157	13354	12614	12343	12976	12716	12288	12151	11541
A8	6293	4804	3486	2695	2442	2395	2365	2100	2324	2284	2527	2482	2538	3146	3354	3886	4612	4459	5467	5629	6423	6666	7169	7533	7921	8707	9526	9877	10734	11067	11314	11577	12586	12307	12603	12842	13118	13174	13231	13438	12926	13242	13161	13168	13136	12317	11864	11994	12054
A9	6703	4705	3602	2888	2477	2380	2113	2230	2280	2418	2501	2509	2865	3113	3498	4072	4463	4646	5331	5591	6179	6651	7124	8038	8433	8593	9091	9801	10379	10657	11055	12088	11713	12282	11884	12513	13239	12727	12914	13178	13561	13096	12771	12572	12396	12021	12202	11951	11386
B7	5806	4403	3414	2833	2468	2403	2123	2095	2090	2374	2626	2447	2863	3343	3535	4041	4557	5257	5647	6046	6264	7379	8585	8462	9228	9637	10190	10914	11572	12112	12692	13133	13725	13717	14725	14204	14435	14834	15202	14986	14719	15013	13983	13931	14443	13423	13705	13297	12443
B8	6534	4390	3236	2696	2244	2253	2053	2170	2353	2389	2544	2679	3073	3414	3547	3803	4794	4564	5691	5929	6736	7450	7754	8287	9115	9865	10094	10924	11073	11924	12584	12269	13643	13531	13970	14513	14069	14754	14292	14083	14797	14986	14452	14560	13858	13497	13269	13231	12314
B9	6293	4825	3501	2979	2335	2116	2172	2208	2080	2206	2395	2954	2965	3286	3617	4120	4363	4904	5570	5984	6529	7297	7830	8109	9234	9858	10383	10784	11261	12093	12184	12532	13457	13487	13641	14866	14619	14387	14711	14566	14751	14930	14472	14399	13894	13806	13912	13087	12988
C7	6186	4674	3635	3204	2508	2404	2272	2446	2640	2650	2833	3102	3647	4017	4456	5005	5877	6037	6751	7585	7636	8958	9780	10593	11863	12026	13104	14233	14500	15369	16378	16689	17114	17820	18233	18194	18805	18696	19071	19041	18551	18400	19312	18552	18034	17339	16884	17036	16294
C8	6229	4550	3510	3179	2736	2519	2328	2310	2457	2821	2868	3296	3496	3941	4273	4689	5195	5909	6780	7481	7529	9175	9355	10178	11104	12149	13517	13518	14377	14818	15708	16613	16474	17793	17472	17969	18611	17493	18676	18857	18842	18309	18070	18012	17360	17259	16873	16869	16020
C9	6254	4436	3712	3247	2776	2441	2241	2165	2304	2652	3090	3383	3600	3903	4417	4819	5146	6380	6825	7864	7658	8993	9817	10728	11438	11787	12581	13670	13582	15167	16206	16157	16389	17679	18038	18670	18394	18306	18609	18421	18632	19330	18349	17681	17827	17458	17584	16646	16047
D7	6530	4745	3568	3237	3024	2607	2553	2712	3181	3064	3776	3921	4831	5536	5870	6491	7494	8421	8840	9966	10863	12334	12769	14847	15996	17546	17606	18789	20072	21205	21697	22982	23884	25134	25069	26201	25480	26424	26399	27622	26734	26783	26789	25576	25462	24968	24163	24332	22734
D8	6638	4698	4037	3160	2797	2756	2735	2954	2943	3584	3708	3952	4672	5345	5592	6504	7361	8217	9228	10462	10635	12133	13040	14787	16727	17600	18649	18935	19454	21553	22696	23070	24276	24751	25603	26192	26171	26799	26398	27218	26444	27030	27036	25896	27221	25416	25009	24077	23492
D9	6206	4850	3703	3322	3116	3033	2919	2903	3360	3246	3677	4062	4737	4914	6148	6388	7369	8528	9093	10307	10881	12652	13192	14495	15380	16591	18825	19532	19585	20714	21679	23803	23281	24592	25328	25342	26218	26495	26515	26574	27702	26819	26814	25595	25256	25831	24822	24416	23755
E7	6824	4912	4325	3711	3343	3192	3420	3483	4045	3948	4594	5140	5866	6614	7258	8346	8989	10241	11619	13275	13570	15897	16472	18264	20182	22607	23346	24694	25452	27230	29571	29941	30795	31346	32848	33191	34353	35003	33786	34816	34083	33990	33871	33106	33167	32483	32718	31642	30398
E8	6475	4927	4184	3288	3217	3314	3105	3423	3558	3991	4577	5240	5767	6431	7412	8603	9122	10732	11517	13240	13663	16033	17228	18354	20508	22008	22966	24634	26148	27803	28903	29635	31218	32446	33187	33256	33694	34526	34746	35016	34751	34857	34972	34476	33414	32541	31615	32343	30347
E9	6493	4948	4219	3361	3158	3129	3118	3668	3833	4171	4505	5351	6003	6187	7386	8181	9674	10692	11323	13091	14302	15819	16915	18188	20379	22094	22809	24878	26132	27800	29418	30239	30655	31751	33032	33339	34904	33779	35075	35499	34394	34971	35136	33851	33806	32711	32910	31090	29868
F7	6543	5292	4248	3715	3371	3122	3595	3826	4011	4305	4919	5471	6344	6790	8126	9210	9939	11615	12988	14282	15325	16534	19426	20686	22421	23784	25359	27251	28810	30600	30869	31644	33195	34383	35885	36484	36465	38155	37747	38191	37753	38212	38050	37633	35897	35594	35546	35236	32356
F8	7140	4827	4015	3558	3580	3257	3343	3604	3661	4322	4961	5520	6200	7213	7977	8990	10325	11210	12532	13677	14806	17205	17749	19238	22314	23256	25297	27044	27921	29867	30624	31611	33890	34802	35170	35751	37232	37279	36456	38009	37441	37452	38023	37096	36035	35235	34439	34961	32159
F9	6729	4805	3999	3520	3372	3055	3264	3295	3863	4377	5075	5413	6232	6891	7631	8834	9883	11569	12320	13643	14563	17374	19094	19202	22164	23421	24545	27262	28172	28748	31449	32918	33372	34615	34666	36424	36825	36478	37947	37829	37668	37595	37950	36985	36345	35145	35863	33799	31974
G7	6270	4780	4131	3615	3322	3451	3582	3704	4198	4405	5271	5611	6284	6780	8032	9425	9951	11112	12551	14339	15402	17634	18867	20681	22925	23894	25874	28077	28610	29985	32217	32624	34074	36056	35939	37279	37654	38359	38158	38742	37372	38582	37808	38319	36739	37398	35307	33919	34172
G8	6755	5171	3952	3743	3457	3442	3240	3749	4073	4453	5396	5844	6461	7467	8037	9413	10842	11353	13554	13593	16640	17901	18584	20661	22281	24118	25286	26904	29231	30436	32027	34126	34390	37087	36443	37282	37420	38413	38574	39098	38639	39980	38191	37369	38672	36514	35441	35374	33632
G9	6394	5093	4348	3553	3290	3605	3220	3817	3844	4671	4841	5404	6116	6890	8274	9239	10883	11439	13709	13713	16080	17381	19342	21395	22494	24814	25567	27687	28703	29519	32265	32671	34072	35159	36168	37367	38322	38653	39466	39770	39575	38552	38769	38440	37218	36448	36104	35670	34705
H7	7124	5038	4174	3756	3455	3444	3299	3612	4174	4346	5127	5561	6852	7288	8197	9190	10636	11554	12927	14544	15958	18064	18797	20932	23306	24456	26356	27276	29450	30854	32181	33815	34235	36776	37222	38121	39032	39130	39482	39957	39376	39685	39410	38149	38149	36906	37844	35285	34466
H8	6949	4999	4330	3630	3359	3383	3590	3697	4121	4480	5037	5870	6659	7725	8155	9381	10780	11961	13147	14635	16540	17677	19956	21259	23212	24627	26938	27935	29195	31818	32685	34111	35846	36891	37207	38451	39855	39583	39155	40192	39470	40655	38819	38919	38103	37813	37193	36265	34611
H9	6965	4890	4260	3513	3619	3303	3611	3880	4195	4504	5002	6182	6558	7776	8417	9459	11132	11895	13918	14422	16551	17611	19318	21647	23580	25337	27106	29657	30019	31828	33567	34219	35983	37029	38428	39375	39235	39398	40691	39983	40362	40454	40409	39426	37844	37690	36186	35070	35938
															TMR int.	SiR int.	Ratio (TMR/SIR)			[NAD+] (M)	Mean Ratio (TMR/SIR)	SD
														A7	12858	23229	0.553532			0.02	0.560616	0.0121592
														A8	13174	22925	0.574656			0.002	0.672549	0.0294067
														A9	12727	22987	0.553661			0.0004	0.928714	0.0380152
														B7	14834	21555	0.688193			8e-05	1.7172	0.0638124
														B8	14754	21357	0.690827			1.6e-05	3.04052	0.0384353
														B9	14387	22528	0.638627			3.2e-06	3.84062	0.172204
														C7	18696	19772	0.94558			3.2e-07	4.21421	0.188648
														C8	17493	19762	0.885184			3.2e-08	4.32685	0.183564
														C9	18306	19161	0.955378
														D7	26424	14882	1.77557
														D8	26799	16251	1.64907
														D9	26495	15342	1.72696
														E7	35003	11624	3.01127
														E8	34526	11195	3.08406
														E9	33779	11162	3.02625
														F7	38155	9504	4.01463
														F8	37279	10157	3.67028
														F9	36478	9507	3.83696
														G7	38359	9170	4.1831
														G8	38413	9501	4.04305
														G9	38653	8752	4.41648
														H7	39130	9492	4.12242
														H8	39583	9036	4.38059
														H9	39398	8799	4.47755
[truncated: 152 more columns]

## Sheet: pH 7.5
Titrations of NAD-Snifit with NAD+, pH 7.5, 25°C
Wavel. (nm)	540	541	542	543	544	545	546	547	548	549	550	551	552	553	554	555	556	557	558	559	560	561	562	563	564	565	566	567	568	569	570	571	572	573	574	575	576	577	578	579	580	581	582	583	584	585	586	587	588
A10	6056	4692	3493	3169	2459	2356	2315	2222	2479	2161	2549	2722	2804	3260	3574	3889	4385	4829	4923	5540	6335	6786	7657	8155	8738	9092	9308	10190	10526	10922	11256	12021	12471	12564	12911	12846	13993	13251	14438	13400	14442	13612	13881	13791	13370	12755	12642	12346	11970
A11	6420	4815	3466	2815	2598	2450	2054	2193	2123	2412	2443	2587	2950	3227	3579	3975	4369	4676	5191	5802	6108	7166	7179	7870	8607	9125	10137	10074	10642	11437	11164	12456	12439	12718	13261	14285	13827	14224	13397	13632	13820	13943	13262	13983	13448	13075	12847	12260	11830
A12	6391	4688	3468	2992	2481	2436	2127	1980	2346	2340	2388	2683	3011	3256	3333	3945	4060	4526	4948	5548	6074	6441	7060	7635	8142	8884	9617	10320	10447	10967	10617	11356	11897	12630	12236	12791	13321	12654	13666	13443	13703	13306	13319	12569	12886	12190	12851	11797	11390
B10	6165	4609	3268	2818	2558	2472	2221	2345	2254	2712	2897	2858	3241	3436	3860	4479	4968	5041	5894	6672	7037	8175	8843	9061	10151	10319	11048	11923	12432	13070	13295	13940	14275	15154	15028	16284	16071	15804	16110	15956	16294	15533	15883	15548	15925	14656	14795	14483	14008
B11	6189	4763	3190	2717	2589	2357	2252	2398	2097	2394	2719	3030	3195	3697	3580	4274	4597	5161	5791	6248	7220	7606	7834	8889	9757	10011	11285	12474	12103	12899	13250	13668	14155	14937	15286	15984	15418	15904	16508	15960	15545	15550	16098	15037	15114	14966	14119	14140	13802
B12	6557	4322	3712	2710	2605	2118	2263	2211	2367	2342	2584	2833	3172	3475	4057	3986	4888	5254	5990	6719	7081	7790	8745	8754	9701	11097	10954	11908	12642	12833	12855	13805	14434	14232	15029	15404	16044	15094	15860	16354	15952	16764	16375	15019	15036	15196	14786	13916	13322
C10	6198	4827	3363	3324	2997	2488	2696	2508	2644	2979	3144	3457	3725	4504	4788	5747	5942	6844	7602	8121	9174	9983	10557	12002	12574	13632	14264	15492	15375	16460	16895	18190	19158	19998	19317	20367	21936	21034	21167	20624	21322	21046	20805	20683	19824	19786	19481	18516	18197
C11	6433	4829	3886	3096	2883	2565	2230	2435	2599	2971	3172	3099	3799	4336	4918	5502	6054	6589	7373	8297	8975	9691	10738	11598	12474	13378	14579	14956	16044	17023	17721	18661	19268	19047	19488	20080	21066	20583	21167	21044	20891	21487	20551	20168	19968	20249	19085	18490	19191
C12	5908	4450	3417	3120	2622	2588	2566	2571	2536	3051	3251	3287	3825	4536	5276	5590	6164	6606	7418	8285	9203	10054	10789	12044	12720	13611	14292	15525	16245	16751	18636	18304	19262	19667	19962	20846	21245	21068	21017	21479	21544	21281	21327	20813	21040	20657	20405	18878	18859
D10	6544	4857	3899	3396	3024	2827	2917	3223	3221	3432	4036	4353	4971	5836	6403	7241	8193	8887	9637	11373	12382	13757	14388	16160	16551	18767	18917	20833	22072	23795	24430	25094	26070	26763	27274	28368	29079	29066	28528	29203	28890	28430	28894	29166	28102	26943	26266	26110	25656
D11	6765	4653	3818	3258	3067	2882	2920	3098	3129	3565	3784	4496	5054	5726	6354	7454	8075	9000	10146	11363	12407	13191	14340	16201	17681	18430	19806	21612	21836	24550	24153	25539	26650	27255	28122	29037	29399	29752	29445	29808	29543	29643	29644	29328	28421	28155	27166	27007	25877
D12	6430	5312	4024	3357	2966	2874	2928	3142	3268	3715	4198	4379	5227	5826	6868	7368	8490	9014	10613	11367	13275	13361	14443	16256	17451	18561	20552	21438	23148	23283	24694	25889	26799	27710	27950	29417	29373	29490	30179	29854	29743	29198	29088	29122	28261	28378	28493	26339	25950
E10	6412	4668	4084	3692	3074	2943	3096	3538	3725	4270	4950	5551	5918	6989	7503	8571	9816	11127	12211	13713	14866	16217	18389	19487	21712	23033	24030	26147	26775	29029	31217	30945	32890	33670	34355	36031	35222	35906	37399	36614	35685	35448	35618	34886	34984	34280	34074	32419	31517
E11	6654	5196	3714	3380	3247	3280	3295	3433	3697	4150	4865	5526	6046	6817	7921	8627	9550	10622	11924	12987	14869	16831	17662	19053	21333	22787	24237	26277	28072	28643	29787	31118	32154	33126	33644	35004	35907	35144	36174	36910	35542	36253	35779	34922	34106	34544	34626	32621	31309
E12	6643	5264	4210	3755	3352	3269	3388	3599	3849	4256	4889	5504	6014	7021	7965	8932	9941	11166	12677	13702	14687	16264	17974	19952	21037	23365	24589	26239	27322	28416	30458	30993	32346	33593	34546	35046	36118	35830	36469	36703	37507	36834	36367	35532	35805	33521	34509	33164	32156
F10	6391	5123	4303	3691	3414	3351	3619	3686	4046	4315	5064	5403	6126	7403	7711	9438	10639	11309	12931	13706	15558	17482	18994	20520	21765	25330	26447	27934	28662	30062	31786	32842	34796	35398	36399	37484	38218	38677	39170	38159	37941	38377	37844	37381	36757	36186	35286	34878	34168
F11	6598	5195	3898	3403	3329	3170	3335	3884	4163	4232	5120	5373	6459	7382	8536	9271	10236	11477	13089	14420	15361	17333	18559	20825	22193	24177	25921	27745	28691	30468	32428	33373	34369	35662	36696	37000	37936	37345	38175	39045	38200	38200	37828	37658	36690	36759	35837	34271	33575
F12	7056	5072	4215	3618	3558	3488	3467	3761	3847	4684	5370	5582	6319	7382	7798	9226	10283	11225	13009	14302	15541	17496	18935	21047	22105	24220	25847	27990	29223	29945	32103	33273	34307	35731	36379	37306	38008	37486	38409	38637	39299	38439	38113	37765	37338	36154	35927	34428	33131
G10	6742	5177	4055	3616	3615	3585	3371	3771	4168	4638	5213	5592	6425	7036	8567	9222	10432	11673	13095	14922	16388	17641	19269	21325	22980	24152	25110	28245	30035	31095	31999	34328	35674	35672	36911	38288	38440	38836	39342	39662	39595	38729	39149	38404	38155	37984	36008	34975	35091
G11	6380	5257	4264	3356	3377	3388	3613	4014	3927	4478	5204	5589	7130	7499	8557	9138	10613	11313	13528	14109	16500	17814	19907	21194	23470	24360	26095	27972	29277	31417	32016	33999	34706	36151	36412	38578	38493	38357	39294	39438	39114	39992	38906	38357	38704	38433	37024	35285	34249
G12	6805	5303	4185	3481	3553	3585	3583	3672	4089	4660	4970	5609	6599	7207	8221	9279	10199	11635	13532	14424	15929	17273	18209	20564	23184	24336	25984	27981	28928	30896	32929	34481	35004	35257	35975	36960	38156	39349	38709	38411	38568	38874	38936	38368	38226	36694	35575	35156	34011
H10	6396	5120	4036	3529	3458	3609	3502	3489	4048	4503	5371	5658	6431	7658	8392	9560	10489	12273	13214	14488	16066	17797	19803	21895	23089	24597	26041	28109	28994	30773	33344	34284	35265	35751	36882	38564	38186	39634	39403	38530	38985	39333	39879	39248	38071	38300	36400	35615	34353
H11	6848	4988	4180	3578	3446	3580	3616	3471	3992	4444	5430	5936	6560	7659	8477	9523	10809	12528	14013	14544	15695	18556	19234	20488	23716	24784	26509	28009	30332	30621	33100	34916	35263	36543	37293	38729	39432	39925	39406	40290	39720	39217	38414	39770	38162	37171	35971	35125	34920
H12	6770	5118	4174	3817	3734	3252	3274	3735	3939	4400	5362	5975	6748	7515	8462	9322	10783	11690	13441	14815	15702	18080	18902	20556	22158	23921	26026	27778	28993	30131	32657	34207	34890	36368	36536	37820	38910	38917	38686	39154	39792	39059	38207	37640	37712	37254	35926	35021	33981
															TMR int.	SiR int.	Ratio (TMR/SIR)			[NAD+] (M)	Mean Ratio (TMR/SIR)	SD
														A10	13251	22053	0.600871			0.02	0.609735	0.0196046
														A11	14224	22499	0.632206			0.002	0.730594	0.00886425
														A12	12654	21227	0.596128			0.0004	1.12864	0.0170179
														B10	15804	21467	0.7362			8e-05	2.21001	0.0744293
														B11	15904	21632	0.735207			1.6e-05	3.41574	0.0643257
														B12	15094	20953	0.720374			3.2e-06	4.25098	0.152737
														C10	21034	18886	1.11374			3.2e-07	4.38973	0.191222
														C11	20583	18296	1.125			3.2e-08	4.65332	0.13816
														C12	21068	18365	1.14718
														D10	29066	13596	2.13783
														D11	29752	13012	2.2865
														D12	29490	13370	2.20568
														E10	35906	10584	3.39248
														E11	35144	10440	3.36628
														E12	35830	10271	3.48846
														F10	38677	8738	4.4263
														F11	37345	9006	4.14668
														F12	37486	8968	4.17997
														G10	38836	8779	4.42374
														G11	38357	9168	4.18379
														G12	39349	8626	4.56167
														H10	39634	8430	4.70154
														H11	39925	8386	4.76091
														H12	38917	8653	4.49752
[truncated: 152 more columns]

## Sheet: pH 8.0
Titrations of NAD-Snifit with NAD+, pH 8.0, 25°C
Wavel. (nm)	540	541	542	543	544	545	546	547	548	549	550	551	552	553	554	555	556	557	558	559	560	561	562	563	564	565	566	567	568	569	570	571	572	573	574	575	576	577	578	579	580	581	582	583	584	585	586	587	588
A10	5720	4848	3808	3170	2711	2272	2360	2095	2327	2192	2411	2664	2837	3014	3153	3633	4355	4267	4943	5097	5984	6312	6919	7582	7971	8233	9485	9571	10439	10599	11037	11733	11859	12270	12334	12640	13022	13221	13165	13727	12706	13730	13253	12896	12696	12275	12791	12252	11615
A11	6765	4638	3429	3083	2430	2108	2421	2003	2217	2303	2523	2538	2939	3260	3332	3722	4155	4773	4507	5134	6141	6577	7060	7514	7543	8139	9310	9590	10443	10361	11151	11236	12348	12191	13036	12772	13155	12413	12616	13068	13024	12798	13085	12829	12875	12382	12257	12001	11223
A12	6730	4915	3374	2887	2602	2271	2153	1975	2158	2062	2287	2521	2571	3087	3215	3682	4012	4243	4532	5443	5634	5814	6758	7202	7848	8032	8370	9439	9257	10117	10316	10639	12007	10932	12114	12475	12748	12400	12467	12144	12127	12468	12309	12684	11360	11724	11806	11277	11266
B10	6261	4889	3492	2721	2703	2089	2169	2212	2125	2283	2480	2588	2827	3321	3688	4062	4686	4862	5853	6062	6392	7480	8189	9056	8926	9971	10377	10979	11890	12563	12888	12968	13413	13865	14134	14772	14551	14874	15339	15204	15213	14916	15379	15256	14719	14087	14011	13751	13206
B11	6710	4765	3098	2967	2323	2325	2195	2072	2109	2325	2394	2868	3028	3203	3660	3929	4500	5156	5388	6038	6611	7544	8238	8878	9368	9584	10354	11371	11385	12466	12809	13128	14222	13734	14560	14661	14949	15918	14910	14895	15886	15430	15025	14875	14942	14247	13453	13503	13028
B12	6338	4704	3337	2863	2420	2156	2162	2076	2226	2173	2474	2552	3159	3269	3613	3958	4580	5062	5540	6003	6246	7428	7433	8244	9266	9745	10523	10457	11310	11797	12819	13638	14004	14042	13773	15036	14885	15016	15189	15574	15266	15064	14940	14423	14553	13981	13971	13586	13465
C10	6647	4885	3654	3071	2711	2317	2531	2459	2506	2845	2965	3579	3688	4231	4289	4980	5646	6303	7340	8022	9063	8976	10326	10875	11840	12474	13473	14854	15321	16063	16771	17252	17836	17869	18277	19069	19802	19441	19630	18898	20524	19586	19783	18936	19187	18644	18323	17385	17018
C11	6533	4652	3558	2940	2631	2788	2210	2394	2560	2762	3001	3033	3617	4227	4560	4792	5766	6236	7025	7989	8171	9130	9906	10784	11410	12185	13286	14197	14926	15681	16366	16798	17146	17641	18778	19708	18504	19359	19596	19654	20557	19397	19559	19556	18775	18060	18750	17055	17112
C12	6488	4701	3656	2895	2657	2675	2210	2326	2502	2453	2978	3295	3844	4165	4378	5411	5668	6343	6996	7692	8441	9397	10365	10857	11948	13416	13768	14313	14884	16168	16685	17241	18279	18309	19157	19151	19519	19820	20526	20316	20119	19760	19676	19892	18999	18327	18364	17635	17349
D10	6783	5156	3955	3451	2935	2907	2891	2723	3391	3489	3950	4153	4787	5496	6101	7002	8085	8509	9241	10955	11365	12849	13192	14760	16441	17535	18901	20183	20752	21864	22786	23417	25613	26759	26476	27029	28104	27704	27381	27402	27439	27695	27615	27275	26423	26369	25759	24939	23739
D11	6372	5419	3913	3441	3244	2618	2866	3189	2933	3646	4017	4336	4715	5362	6073	6707	7582	8728	9300	10598	11589	13016	14022	14551	16610	17355	19491	19936	20772	22145	23067	24168	24532	25788	25634	26344	27746	27721	27969	27693	28144	27760	27237	27411	27123	25484	26101	25314	23544
D12	7190	5193	3683	3391	3182	2539	2828	2910	3407	3307	3938	4059	4752	5596	5723	6841	7551	8948	9622	10645	11061	12759	14233	14881	16342	17176	18754	19912	21118	22405	22746	23939	24992	25080	26260	28297	27285	26937	27634	27883	27951	28374	27826	26829	27018	26250	25342	24545	24313
E10	6866	5085	3642	3509	3379	3141	3179	3403	3623	4127	4282	4792	5623	6151	7022	7753	8608	9824	11094	12153	13372	14745	16042	17644	19333	21170	21738	23412	24461	26783	27549	28248	29115	30425	30491	31028	32824	32905	32097	33220	33632	33579	32695	32752	32330	31559	30376	30414	29915
E11	7069	5134	4104	3623	3247	2888	3218	3259	3495	3932	4700	4871	5573	6258	7047	8010	9134	10050	10926	12347	13068	14722	15895	17568	18980	20425	22406	23230	24783	27039	27264	28392	30569	30613	30192	32193	32435	32475	33949	33209	34245	34101	32949	32703	31778	31838	30354	30703	28674
E12	6805	4955	4013	3549	3274	3215	2999	3595	3553	4067	4518	4896	5859	6992	7222	8293	9150	10397	11512	12781	14353	15530	16349	17637	19640	21408	22595	25116	24207	26268	28037	28169	29561	31121	32002	33044	33390	33644	33646	34641	33932	34067	32981	33555	32358	31818	31043	30217	29545
F10	6878	5430	4213	3494	3466	3296	3256	3526	3726	3894	4418	5117	5957	6673	7456	8517	9534	10044	11689	12487	14000	16105	16783	18501	20073	22122	23193	24295	25118	27369	29750	29775	31054	32269	32435	34719	34163	34857	35335	35153	35164	34761	34996	35053	33377	32834	33064	32052	31356
F11	6911	4998	4351	3307	3178	3221	3321	3636	3711	4317	4788	4885	5695	6657	7464	8604	9365	10089	11687	12751	14226	16028	16776	18622	20303	22482	23514	24310	25444	27753	29843	29145	31505	32235	33534	34021	34423	34549	35195	34630	35267	35601	34281	34166	34424	32593	32240	31393	30337
F12	6756	5065	4106	3557	3639	3200	3376	3485	3586	4092	4460	5062	5671	6784	7343	8471	9251	10847	11807	12814	14283	15354	17260	18031	19880	21432	23061	24071	25093	27181	28614	30091	31011	31648	32105	33423	33857	34075	35580	34282	35449	34389	34718	34376	33030	33363	33187	31442	30636
G10	6476	4965	3947	3948	3348	3297	3326	3701	3885	4046	4616	5233	5721	7139	7414	8560	10037	10644	12413	13243	14565	16366	17116	18748	20209	22732	23512	24853	26396	27669	29795	30196	31460	32846	33560	34605	34282	35084	35003	35363	36116	35967	35140	35777	33281	33976	32429	32815	31330
G11	6929	5129	3872	3567	3678	3020	3370	3639	3832	3869	4750	5474	5871	6908	7573	8654	9928	10786	11838	13208	14453	15982	16957	19350	20600	21969	23411	25188	26719	27418	28890	29838	31464	32680	33634	34243	35205	35425	35444	34923	35308	35840	36178	34560	34107	33682	33219	32914	30929
G12	6606	5446	4104	3575	3316	3443	3393	3412	3828	4357	4602	5113	5713	6916	7426	8004	9388	10541	12257	12206	14271	16456	17392	18855	19922	21902	22648	25258	25689	27582	28593	30090	30810	32031	32598	34032	33563	33920	35038	34987	35604	34891	34379	33208	33577	34094	32297	31146	30546
H10	6542	5080	4063	3634	3544	3176	3390	3432	3729	4554	4974	5489	6070	6914	7643	8629	10342	10876	12137	13445	14664	16272	17423	19216	20511	22010	23666	25295	26345	28304	30189	31073	33690	33669	33609	34783	34030	36163	36347	35993	35742	36248	35176	34865	34144	34005	33403	31871	31013
H11	7024	5026	4255	3725	3543	3364	3276	3319	3674	4204	4652	4897	6092	7280	7314	8407	10025	11015	12883	13194	15214	15842	17320	19047	20835	22438	23891	25008	27620	28605	29554	31652	31398	32950	34212	34788	34941	35841	36347	35814	35534	35751	35688	35130	34091	34438	33785	32408	31336
H12	6996	5514	4138	3448	3460	3459	3375	3230	3632	4292	4618	4986	6352	6805	7654	8345	9472	10807	12026	13265	14142	16132	16775	19426	20138	22259	23055	25200	26527	27190	29568	31008	31849	32348	33786	34516	35309	35522	35395	34467	35485	34802	35438	33498	34172	33500	33784	32242	31359
															TMR int.	SiR int.	Ratio (TMR/SIR)			[NAD+] (M)	Mean Ratio (TMR/SIR)	SD
														A10	13221	20700	0.638696			0.02	0.642409	0.0176108
														A11	12413	19799	0.626951			0.002	0.802603	0.0131797
														A12	12400	18743	0.66158			0.0004	1.22619	0.0320438
														B10	14874	18685	0.79604			8e-05	2.2863	0.0376622
														B11	15918	19465	0.817775			1.6e-05	3.69508	0.10751
														B12	15016	18912	0.793993			3.2e-06	4.43275	0.120234
														C10	19441	16203	1.19984			3.2e-07	4.57801	0.0376447
														C11	19359	15909	1.21686			3.2e-08	4.67097	0.165085
														C12	19820	15707	1.26186
														D10	27704	12235	2.26432
														D11	27721	12240	2.26479
														D12	26937	11562	2.32979
														E10	32905	9208	3.57352
														E11	32475	8697	3.73405
														E12	33644	8906	3.77768
														F10	34857	7625	4.57141
														F11	34549	7907	4.36942
														F12	34075	7820	4.35742
														G10	35084	7737	4.53457
														G11	35425	7704	4.59826
														G12	33920	7372	4.60119
														H10	36163	8015	4.51192
														H11	35841	7692	4.65952
														H12	35522	7337	4.84149
[truncated: 152 more columns]
