# Supplementary material for: Semisynthetic biosensors for mapping cellular concentrations of nicotinamide adenine dinucleotides
Source: eLife. 2018 May 29;7:e32638. doi: 10.7554/eLife.32638 (PMC5990361; doi:10.7554/eLife.32638)
Supplement: Appendix 1—figure 1—source data 3. [file elife-32638-app1-fig1-data3.xlsx]

## Sheet: App1_Figure_1d
	Control		10 mM ATP		1 mM ADP		1 mM GTP		100 uM NMN		100 uM nicotinamide		100 uM NADH		100 uM NADPH		100 uM NADP+		100 uM sepiapterin
[NAD+] (M)	Ratio (TMR/SiR)	SD	Ratio (TMR/SiR)	SD	Ratio (TMR/SiR)	SD	Ratio (TMR/SiR)	SD	Ratio (TMR/SiR)	SD	Ratio (TMR/SiR)	SD	Ratio (TMR/SiR)	SD	Ratio (TMR/SiR)	SD	Ratio (TMR/SiR)	SD	Ratio (TMR/SiR)	SD
0.02	0.703177	0.00975049	0.654131	0.0332046	0.638785	0.0197608	0.64708	0.0117527	0.651602	0.00670561	0.667349	0.0181315	0.62547	0.0181566	0.610593	0.00534578	0.709181	0.0136979	0.832991	0.0143093
0.002	0.83064	0.0473009	0.792255	0.0350891	0.755436	0.0034452	0.751182	0.00949344	0.825955	0.0208009	0.842247	0.0249977	0.780248	0.0150603	0.743764	0.024356	0.844574	0.0188684	0.874571	0.028897
0.0004	1.23764	0.0599714	1.14955	0.016946	0.983503	0.162194	1.09455	0.038797	1.25198	0.0368559	1.26898	0.0407636	1.13542	0.0627664	1.06839	0.0256098	1.27925	0.0370747	1.24789	0.034638
8e-05	2.46113	0.0560444	2.16196	0.0285863	1.98616	0.0349693	1.90259	0.0693316	2.35089	0.0430267	2.39451	0.100471	2.02605	0.101402	1.87819	0.0535635	2.44757	0.0520114	2.27207	0.144726
1.6e-05	3.76251	0.0824097	3.47054	0.112633	3.33506	0.166585	3.30631	0.050083	3.6409	0.156906	3.60065	0.114779	3.30906	0.0677838	3.22938	0.0857543	3.73	0.0246032	3.43823	0.151045
3.2e-06	4.41579	0.0935328	3.85251	0.120679	4.09259	0.185896	4.0818	0.0891054	4.2778	0.198596	4.07619	0.0935196	3.92915	0.171315	3.90513	0.0551665	4.25811	0.101405	4.15428	0.157676
3.2e-07	4.37669	0.272371	4.26497	0.169586	4.26631	0.0716637	4.11184	0.101175	4.48045	0.289371	4.37352	0.140311	4.04649	0.0825567	4.17781	0.074607	4.27569	0.10209	4.34334	0.135159
3.2e-08	4.36973	0.145485	4.39484	0.0964437	4.31506	0.119989	4.17106	0.16063	4.61497	0.208486	4.37083	0.301766	4.12058	0.0683086	4.17819	0.123624	4.46021	0.0370492	4.46383	0.0387981

## Sheet: NAD_control
Titration of NAD-Snifit with NAD+
Wavel. (nm)	540	541	542	543	544	545	546	547	548	549	550	551	552	553	554	555	556	557	558	559	560	561	562	563	564	565	566	567	568	569	570	571	572	573	574	575	576	577	578	579	580	581	582	583	584	585	586	587	588
A1	5771	4934	3493	2798	2532	2296	2346	2255	2283	2523	2774	2857	3005	3275	3739	3968	4616	4997	5469	6111	6860	7517	7979	8695	8849	9426	10375	10146	11253	11888	12138	12326	12650	13305	13746	14082	14029	14293	14642	14480	14379	14469	15019	14208	13845	13756	13756	13338	12962
A2	6154	4955	3629	3275	2911	2545	2255	2243	2546	2681	2535	2920	3196	3605	3857	3979	4951	5154	5697	6216	6933	7443	7789	8716	9415	10081	10452	10650	11695	12075	12312	12616	13629	13691	14459	14206	14652	15232	15211	15088	14784	15524	14964	14549	14233	14701	13775	13761	13345
A3	5996	4870	3605	2833	2726	2618	2289	2352	2324	2418	2716	2816	3382	3773	3939	4174	4510	5017	5863	6245	6975	7331	8046	8591	8775	9906	10548	11160	11180	11779	12850	12661	13189	14156	14476	13960	14149	15163	14669	14307	15098	14745	14344	14375	14144	14408	13775	13341	13575
B1	6359	4106	3451	3031	2586	2371	2247	2580	2217	2676	2656	3162	3214	3563	4274	4111	4919	5721	6374	6995	7345	8193	8507	9340	10299	11053	11815	12389	13117	13247	14342	14917	15405	16522	16060	16178	16787	16913	16723	16838	16703	17203	16080	16674	15969	15995	15882	15502	14623
B2	6858	4327	3739	2928	2858	2418	2313	2409	2341	2564	2712	2823	3297	4107	4191	4214	5020	5465	6184	6639	7306	8310	8612	8879	9993	10945	11855	12348	13124	13787	14896	14798	15739	15992	16007	16610	16619	17097	17307	16761	17436	16690	17141	16876	16381	16003	15337	14771	14744
B3	6980	4758	3930	2842	2588	2411	2088	2458	2364	2485	2833	3007	3419	3539	3942	4329	5037	5721	6232	6575	7834	8163	8863	9476	10560	10894	11936	12350	13661	14050	14609	14940	16033	16443	16793	16581	17174	16963	17161	17683	16460	17185	16669	16370	16812	15935	15582	15737	14737
C1	6852	4627	3553	2972	2632	2227	2404	2435	2937	3076	3050	3628	4067	4314	4778	5447	6351	6741	7601	7910	8792	9893	11311	11513	12837	13394	14559	15497	16012	17155	19071	18554	19029	19623	21660	20974	21133	21771	21594	21483	21600	21374	21073	20743	20885	19888	19199	19438	19914
C2	6934	5021	3664	2896	2775	2689	2609	2635	2633	2948	3176	3436	3917	4321	4936	5167	6245	6577	7696	8262	9065	10223	11447	12206	13458	13555	15565	16148	16584	17191	17974	18779	19416	20485	21178	21100	21343	21279	22023	20800	21682	21773	21495	21440	20563	20871	20380	20265	19310
C3	6871	4758	3735	2756	2559	2456	2473	2583	2737	3008	3329	3292	3969	4529	4883	5662	6106	6557	8191	8331	9929	9697	11190	12636	13257	13692	15145	15777	16580	17803	18324	18651	20012	20470	21468	21445	21649	21789	21989	21997	22270	22278	22527	21574	21505	21056	20537	19436	19414
D1	7256	4915	3937	3239	2866	2874	3001	3063	3168	3749	3872	4268	4789	5610	6496	6981	8291	9285	10402	10890	12690	13761	14838	16458	17897	18425	20337	20783	22535	24592	25349	26139	27362	27797	28847	28905	29101	29867	29224	30786	30385	30404	30102	30261	28717	28098	27694	27062	26182
D2	6692	4889	4141	3430	3357	2910	2862	2791	3554	3632	3937	4381	5152	5650	6474	7205	7699	9026	10073	11501	12831	13584	14400	16957	17306	18357	20179	21488	23163	25017	25048	25159	26579	27863	28418	28606	29407	30866	30205	29745	30590	29510	30258	29234	29088	28543	28377	27178	26777
D3	7146	5031	3866	3224	3418	2893	3049	2896	3182	3981	4021	4707	5290	6056	6560	7122	7967	9592	10195	11137	12598	14276	14819	16274	17380	18765	19924	21448	21985	24042	24672	25764	26888	27197	28274	29081	29083	30136	30725	30057	29814	29592	29682	28776	29933	28942	28303	26395	26180
E1	7067	5184	3941	3384	3382	2877	3251	3596	4020	3923	4386	5474	5583	6821	6706	8658	9735	10388	12028	12719	14657	15624	17143	18631	20935	21767	23625	24673	26818	27563	29144	29806	31337	32542	33602	33649	34908	35877	34614	35733	36521	35487	34568	35200	34453	33823	32837	31699	32159
E2	6707	5137	3780	3497	3193	3095	3109	3450	3810	3912	4633	4920	5735	6302	7980	8164	9256	10153	11752	12737	13984	15512	17148	18463	19861	21853	23182	25117	25949	27839	29059	29648	30621	32011	32660	34374	33862	34748	34993	35241	34823	34684	33653	34026	33603	32313	33405	31151	31441
E3	6970	4941	3749	3631	3333	3054	3097	3318	3675	4123	4538	5022	5646	6543	7161	8100	8932	10779	11898	13433	14801	15569	17123	18772	20556	21614	23665	25290	26032	27635	29329	30559	30900	32303	32686	34749	34299	34757	35775	35728	34947	36172	34169	34950	33308	34662	33982	32137	31020
F1	6937	4808	3988	3360	2990	2770	3316	3272	3889	4036	4658	5312	6231	6793	7264	8653	9583	11061	12621	13364	14729	16171	17762	19213	20633	22377	23825	25799	26845	29065	30191	30754	32785	33450	34754	35573	36292	36678	36287	35614	36264	35811	37106	36598	34507	33008	33247	32187	31785
F2	6562	5147	4358	3443	3305	3152	3327	3491	3770	4383	4305	5525	5899	6981	7574	8562	9967	11059	11874	13250	14868	16702	17998	19235	21209	22301	23979	25209	26884	28454	29732	31543	32970	33568	34500	35179	35600	36975	37819	37397	37317	37032	36109	35535	34638	34949	33782	32143	32936
F3	6862	5076	3998	3328	3167	3352	3364	3458	4010	4253	4742	5324	6244	6872	8151	8640	9767	11128	12663	13249	15439	16983	18112	19821	21972	22336	24464	25900	27838	28935	29680	32676	32799	33462	34769	34699	36130	37755	36753	36976	37550	37505	37490	36719	35790	34262	34465	32939	32947
G1	6752	5015	3969	3454	3185	3105	3169	3726	3822	4475	5000	5747	6321	6933	7964	8352	9634	10409	12524	13242	15480	16702	17807	19665	21821	23127	24499	26358	27182	28929	30450	31187	32928	34403	35375	36382	35727	36117	36818	38120	38380	36523	36515	35764	36378	35593	35087	34073	33217
G2	6898	5098	4382	3246	3146	3086	3216	3743	3960	4575	4595	5814	6114	6763	7865	8442	10191	10980	12323	13429	15394	16393	18434	19935	22617	23112	24379	26436	27457	29378	30740	31602	32925	34764	35468	36172	36480	37458	37433	38508	37563	37902	35871	37427	36340	34852	34646	34395	33262
G3	7223	5030	4139	3578	3230	3080	3308	3602	3785	4531	4427	5537	5967	7381	7751	8815	10032	11374	12916	13551	14999	17619	18220	20449	21964	23483	25031	26254	27866	29821	31295	32647	32869	34743	35649	36634	37291	37514	36615	37628	38080	38246	36826	36807	35622	36109	35147	34157	33840
H1	7343	4909	4267	3505	3279	3291	3669	3731	3991	4387	4706	5446	6539	7237	7875	8702	9372	11621	13019	13700	15050	16657	18097	20239	22471	22672	24748	25961	27445	29709	30341	31716	34457	34505	35449	36785	36310	37502	37409	37254	37853	37920	37539	36409	36394	35330	34380	33828	32817
H2	6413	5196	3918	3671	3389	3352	3349	3618	4146	4502	4902	5323	6447	7346	7912	8691	9998	11385	12720	13817	15252	16625	18956	19969	21638	23633	25064	26764	27818	29767	30130	31936	33265	34662	35427	36668	36115	37285	37598	37183	37898	38495	37829	36453	35889	36455	34569	34496	32687
H3	7047	4767	3605	3577	3019	3189	3270	3381	3761	4390	4986	5281	6187	7462	7954	8610	9803	11005	13000	14299	15293	17359	18736	20327	21805	23349	24954	26223	27906	29746	30650	33155	33214	34969	35517	35839	36719	37812	38225	38130	38035	38074	36580	37191	36080	35199	35599	33792	33395
															TMR int.	SiR int.	Ratio (TMR/SIR)			[NAD+] (M)	Mean Ratio (TMR/SIR)	SD
														A1	14293	20657	0.69192			0.02	0.703177	0.00975049
														A2	15232	21495	0.70863			0.002	0.83064	0.0473009
														A3	15163	21387	0.708982			0.0004	1.23764	0.0599714
														B1	16913	19413	0.87122			8e-05	2.46113	0.0560444
														B2	17097	20305	0.842009			1.6e-05	3.76251	0.0824097
														B3	16963	21784	0.778691			3.2e-06	4.41579	0.0935328
														C1	21771	16769	1.29829			3.2e-07	4.37669	0.272371
														C2	21279	18058	1.17837			3.2e-08	4.36973	0.145485
														C3	21789	17625	1.23626
														D1	29867	12230	2.44211
														D2	30866	12228	2.52421
														D3	30136	12468	2.41707
														E1	35877	9305	3.85567
														E2	34748	9309	3.73273
														E3	34757	9396	3.69913
														F1	36678	8197	4.47456
														F2	36975	8583	4.30793
														F3	37755	8456	4.46488
														G1	36117	8875	4.06952
														G2	37458	8163	4.58875
														G3	37514	8389	4.47181
														H1	37502	8277	4.53087
														H2	37285	8777	4.24803
														H3	37812	8732	4.33028
[truncated: 152 more columns]

## Sheet: ATP
Titration of NAD-Snifit with NAD+ and a fixed concentration of 10 mM ATP
Wavel. (nm)	540	541	542	543	544	545	546	547	548	549	550	551	552	553	554	555	556	557	558	559	560	561	562	563	564	565	566	567	568	569	570	571	572	573	574	575	576	577	578	579	580	581	582	583	584	585	586	587	588
A4	6554	4725	3468	3147	2716	2308	2474	2346	2395	2880	2511	2842	3424	3645	3766	4407	4682	5393	5822	6053	6984	7386	7692	8805	9513	9828	10722	11178	12043	12392	12593	12847	13470	13460	13950	14116	15150	14238	14708	15317	14655	14991	14465	14855	14446	13433	13564	12937	13639
A5	7112	4816	3670	2835	2775	2679	2452	2461	2288	2619	2543	2979	3362	3411	4003	4254	4525	5266	5269	6196	6649	7537	7819	8475	8893	9667	10536	10234	10883	11589	12293	12499	13588	13403	14566	14550	14431	14797	14369	14629	14644	14828	14444	14310	14570	14662	13651	12629	12828
A6	7016	4794	3527	3460	2795	2643	2185	2374	2417	2742	2865	2958	3193	3576	4040	4066	4689	5143	5348	6286	6956	7398	7585	8388	8822	9923	10286	11451	12098	11932	13038	13399	13398	13744	14255	14434	14883	14592	15056	14480	15081	14390	14486	14678	14263	13741	14364	13926	13086
B4	6321	4258	3482	2968	2492	2250	2313	2317	2422	2691	2787	2872	3189	3656	4040	4363	5220	5265	6370	6372	7443	8053	8777	9260	10054	10782	11347	12281	12831	13924	14204	14323	14955	16486	15561	16043	16326	16931	17281	15919	16787	15919	17348	16372	15960	15857	14930	15090	14822
B5	6938	5290	3757	2794	2587	2345	2336	2364	2373	2488	2514	2779	3266	3793	3697	4144	4508	5581	5979	6344	7212	7893	8431	9269	10407	10648	10952	12230	12899	12788	13755	14441	14567	15169	15547	15594	16142	16192	16161	16272	16657	16134	16652	15667	16200	14913	15970	15009	14454
B6	6611	4973	3677	3035	2514	2278	2426	2217	2298	2563	2564	2872	3273	3735	3928	4427	4597	5133	6467	6848	7461	7737	8729	9072	10142	11032	11425	11887	13127	13384	13994	14666	14675	15024	15958	16308	16375	16691	16715	17050	16194	16592	16907	15973	16005	14974	15355	14751	15231
C4	7086	4704	3753	3213	2730	2627	2425	2373	2839	2658	3117	3621	4166	4294	4720	4996	6076	7231	7667	8508	8726	9776	10553	12150	11988	13914	14051	15070	16271	16943	17699	18081	18979	18446	19617	20215	20735	21069	21148	20759	20894	21509	20737	19847	20477	20150	19425	18922	17882
C5	6832	4558	3904	2987	2600	2857	2293	2277	2490	3080	3216	3505	3819	4133	5249	5205	6096	6563	7761	8129	9555	9820	10797	11941	12776	13504	14673	15687	16328	17211	17328	18500	18321	19758	20002	20895	21254	20922	21280	20921	21671	21535	21417	20087	20094	20526	19762	19225	18743
C6	6836	4909	3988	2972	2788	2639	2357	2544	2798	3164	3134	3770	3833	4190	5000	5617	6073	7139	7331	8290	8956	9788	11390	11489	12680	13298	14829	16031	16382	16699	17545	18275	19730	20127	20521	20433	20642	21143	21118	21569	21617	21453	21248	21390	20032	20214	19918	18940	18224
D4	6921	5230	3694	3204	3078	2926	2814	3093	3295	3799	4170	4416	4760	5154	6350	6539	7735	8492	9333	10957	12156	12700	13898	15553	17230	18361	18692	20120	21717	22319	22894	24732	25575	26472	26790	27668	28094	29220	29334	28627	29382	28207	27983	28057	27236	27023	26421	26087	25776
D5	7408	5456	3999	3333	3157	2721	2781	2857	3044	3616	4190	4214	4920	5760	5935	6974	7833	8670	10053	10881	11961	13223	14294	15176	17581	17765	19694	20826	21564	22696	24337	24911	26864	26254	27776	27886	28638	28313	29542	29344	29468	28975	28710	28794	28350	27177	27282	26457	25913
D6	7127	5001	4266	3438	2923	2838	2963	3014	3110	3672	4001	4474	5131	5502	6601	7234	7916	8921	10336	10627	11444	13112	13982	16194	17522	18372	19429	21030	22021	22675	23611	25016	26119	26665	27962	28822	27833	29060	28639	29457	29028	28995	28799	28547	28370	27508	27245	26215	25342
E4	6868	5341	4021	3589	3001	3522	3283	3458	3779	4112	4684	5180	5804	6910	7968	7964	9143	10563	12096	13283	14653	15721	16974	18986	20251	21874	23449	24895	26416	27900	28277	30176	30610	33215	32152	34294	34163	35550	34269	34987	35924	36065	34667	34855	34061	33247	33128	31816	30650
E5	7110	4994	3918	3416	3297	3395	2953	3476	4122	4283	4574	5161	5737	6713	7955	8502	9803	11088	11995	12796	14980	16244	17992	18845	20826	21889	23501	25259	26330	28060	28936	30311	30819	32940	33664	34351	34751	34678	35408	35579	35630	35145	35721	35394	34474	34559	32663	32143	31450
E6	7336	5288	4087	3655	3082	3351	3229	3449	3725	4466	4685	4888	5808	7019	7489	8521	8999	10328	11882	12899	14851	16120	17185	18730	20246	21593	24233	25461	26686	27587	29043	30666	32544	32935	33945	33914	34649	35968	36103	35640	35154	34609	35095	34702	34397	33698	31951	32417	30565
F4	7077	5261	4250	3491	3429	3326	3349	3492	4019	4414	4974	5170	6071	6764	7923	8167	9730	10491	12104	12890	14824	16218	17636	18981	20932	22135	23193	24379	26368	28505	29674	30941	32301	33584	34270	34915	34521	34784	36002	36304	36403	35864	35367	36229	35176	34342	33482	32155	31779
F5	6951	5350	4238	3211	3294	3468	3602	3396	3819	4299	4693	5183	6006	7025	7759	8028	9648	10645	12521	12900	14300	15906	17995	20140	21281	22718	24561	26065	26890	28776	29917	31730	32710	33984	34648	35601	35147	36920	36712	37174	37345	37310	36477	36726	35585	35582	33514	33362	32192
F6	7062	5201	4228	3454	3156	3282	3378	3659	3834	4587	4694	5808	6160	7034	7622	8392	9735	11520	12290	13859	15154	16576	17542	20001	21436	22808	24357	25478	27790	28335	30766	31863	33461	34404	35338	35065	35582	36027	36694	37122	36727	37092	36084	36104	35494	35373	34800	33060	32181
G4	6583	5280	4177	3432	3317	3246	3346	3366	3908	4083	4675	5328	5904	6754	7632	8488	9629	10671	11980	13462	15570	16642	18225	19539	21138	23093	23949	25763	27873	29151	30475	31070	32365	33944	35001	36056	36086	37277	37053	37459	37581	37975	37211	35561	35769	34841	34904	33456	33225
G5	6745	5134	4045	3359	2807	3307	3446	3663	3862	4344	4523	5528	6047	6555	7450	8243	10062	10861	12234	13292	14262	16574	17389	19438	21085	23002	23693	25239	27504	29154	30382	31988	33281	32954	34459	35064	36318	35766	36385	36022	36195	37229	36049	35529	35529	34460	34609	32976	32088
G6	7044	4750	3962	3566	3277	3344	3643	3654	3838	4319	4812	5580	6344	7110	7711	8512	9779	11220	12520	13594	14864	16912	18225	20064	21769	23352	24835	25942	28126	29075	31020	31377	32858	34266	34597	36449	36790	38059	37182	37675	36818	37348	36946	36981	36056	35480	34625	34007	34193
H4	6789	4906	4125	3764	3153	3439	3531	3285	3713	4499	5082	5389	6314	7176	8054	8681	10182	11443	12306	14034	15229	17392	19128	20039	21733	23238	25239	27137	28901	30359	31416	32662	33312	35829	35707	37164	37034	38199	38870	38587	38042	38339	37873	38046	36551	35778	35513	34514	33903
H5	7096	4793	3786	3636	3147	3242	3262	3742	3871	4074	4507	5393	6089	7213	7860	8507	9986	11559	12554	13473	15422	17811	18243	19664	21808	23288	24737	26381	27762	29953	30879	32596	33054	34225	36201	35019	36425	37096	37158	38330	37938	37938	36891	36406	34874	34998	34493	33394	33222
H6	6871	4824	3781	3939	3115	3301	3032	3610	3847	4328	4599	5516	6012	6992	7861	8392	10026	11160	12436	13331	14360	16556	17976	19840	22296	22614	24344	25141	27727	28827	30058	31458	32738	34199	34980	34745	36070	36101	36537	37511	36568	36530	36776	36104	35492	35169	34132	33154	32812
															TMR int.	SiR int.	Ratio (TMR/SIR)			[NAD+] (M)	Mean Ratio (TMR/SIR)	SD
														A4	14238	22987	0.619394			0.02	0.654131	0.0332046
														A5	14797	21584	0.685554			0.002	0.792255	0.0350891
														A6	14592	22195	0.657445			0.0004	1.14955	0.016946
														B4	16931	21200	0.798632			8e-05	2.16196	0.0285863
														B5	16192	21463	0.754415			1.6e-05	3.47054	0.112633
														B6	16691	20263	0.823718			3.2e-06	3.85251	0.120679
														C4	21069	18398	1.14518			3.2e-07	4.26497	0.169586
														C5	20922	18430	1.13521			3.2e-08	4.39484	0.0964437
														C6	21143	18098	1.16825
														D4	29220	13559	2.15503
														D5	28313	13246	2.13748
														D6	29060	13249	2.19337
														E4	35550	10291	3.45447
														E5	34678	10300	3.3668
														E6	35968	10018	3.59034
														F4	34784	9305	3.73821
														F5	36920	9613	3.84063
														F6	36027	9055	3.97869
														G4	37277	8394	4.44091
														G5	35766	8718	4.10255
														G6	38059	8952	4.25145
														H4	38199	8477	4.50619
														H5	37096	8551	4.33821
														H6	36101	8318	4.34011
[truncated: 152 more columns]

## Sheet: ADP
Titration of NAD-Snifit with NAD+ and a fixed concentration of 1 mM ADP
Wavel. (nm)	540	541	542	543	544	545	546	547	548	549	550	551	552	553	554	555	556	557	558	559	560	561	562	563	564	565	566	567	568	569	570	571	572	573	574	575	576	577	578	579	580	581	582	583	584	585	586	587	588
A7	6684	4709	3549	3371	2823	2351	2515	2189	2461	2282	2505	2762	3456	3461	3734	4190	4787	4707	6176	6283	6403	7094	7628	8121	9095	9148	10325	10644	10816	11689	12376	12018	12755	13644	13584	13943	13853	14068	14203	14324	14258	14396	14590	14539	14301	13854	13630	12859	12294
A8	7149	4860	3521	3177	2741	2538	2599	2355	2306	2667	2739	2939	3294	3670	3862	3880	4390	5005	5263	5964	6347	7105	7409	8213	8941	9323	9968	10707	11021	11622	12414	12681	13385	13854	13631	14594	14009	14401	14423	13819	13894	14202	14117	13815	13276	13654	13740	13135	13102
A9	7112	4884	3900	2982	2906	2524	2608	2396	2377	2398	2815	2776	3068	3228	3552	3703	4428	4923	5778	6188	5894	6889	7161	7805	8739	9370	9971	10627	10621	11070	12063	12152	12809	12896	13535	13421	13918	14273	13932	13509	13230	13459	13485	13312	13711	13979	13397	13655	12197
B7	6719	4608	3557	2874	2679	2290	2005	2522	2308	2569	2589	2848	3144	3484	4024	3988	4369	5352	6016	6303	6696	7855	8890	8690	9473	10104	11173	11685	12335	13201	12813	13925	14064	14863	14738	15369	15211	15446	15489	15417	15819	16199	15856	14971	14518	14833	14377	14036	13636
B8	6843	4190	3341	2785	2431	2019	2361	2085	2091	2411	2488	2778	3040	3548	3757	4121	4466	5198	5640	6063	6772	7189	8070	8255	9197	9816	10488	11488	11448	12572	12463	13741	14483	14652	14819	14670	15201	15453	15982	15518	15606	14767	15225	15232	14388	14682	14524	13775	13377
B9	6911	4707	3442	2826	2526	2261	2132	2140	2108	2436	2340	2663	3076	3648	3849	3971	4661	4938	5535	6106	6523	7323	8004	8361	9499	9885	10778	11844	11987	12202	13252	13507	13514	14286	14095	15077	14880	16236	15054	15839	15433	14883	15188	14744	14546	13802	14110	13482	13795
C7	6688	4878	3947	3045	2613	2604	2491	2421	2556	2629	3081	3157	3893	3923	4805	5393	5608	6265	7047	7202	9067	8853	10148	11175	11893	12896	13790	14571	15596	15893	16918	17536	18555	18228	19096	18773	19901	20159	20611	20493	20297	20270	19698	20084	19171	18555	19040	18152	17370
C8	6617	4673	3609	3059	2807	2514	2110	2237	2684	2714	3075	3394	3889	4201	4470	5170	6104	6195	7137	7378	8512	9575	9262	10921	11596	12375	13260	14388	14732	16038	16242	17443	17462	18546	18681	19075	19991	19415	19950	19607	19990	19641	20416	20108	19140	18699	18198	17636	17838
C9	6609	4716	3641	2846	2583	2229	2236	2186	2183	2453	2768	2833	3445	3661	3830	4332	5141	5574	6195	6637	7203	8085	8364	9443	9754	10552	11270	12225	12749	13460	13679	14455	14862	15922	16143	15864	16279	16572	16329	16694	16372	17189	16380	16065	16521	15542	15664	15476	14328
D7	7053	5245	4024	3410	2871	2809	2799	3150	2931	3410	3779	4628	5132	4927	6048	6863	7917	8552	9209	10167	11512	12645	13578	15284	16788	17235	18706	19783	20505	21817	22942	24345	24703	25816	26317	26668	27131	27572	27334	27783	27691	27984	26849	27397	26818	25988	25293	24927	24132
D8	7174	4483	3820	3073	2977	2788	2667	3125	3455	3449	3731	4299	4678	5353	5841	7135	7192	8752	9271	10623	11598	13015	13556	15133	16821	17070	19067	20361	20707	21641	22569	24459	23832	25296	25929	26793	26652	27374	27891	27701	27916	27515	28296	26981	26856	26211	26095	24308	24335
D9	6631	5230	3766	3402	3086	2916	3005	2719	3311	3642	3604	4568	5002	5262	6308	6523	7239	8081	9851	10407	11323	12153	13259	14747	16058	17161	18860	20086	20932	22071	22948	24156	25597	25390	26613	25842	26921	27680	27522	27816	27680	27969	27523	27179	26079	25983	26236	25508	24161
E7	7365	4961	3987	3552	3258	3169	3140	3514	3743	4191	4284	5059	5850	6365	7296	7984	8986	9865	11359	12107	13496	15518	16128	18425	19801	20682	22876	23629	25006	26957	28011	29809	30874	31339	31768	33828	33101	33796	34143	33838	34051	34686	34053	33530	33021	31720	31899	30434	30326
E8	7033	5245	4356	3251	3107	3091	3166	3299	3701	4417	4247	5141	5569	6161	7435	8135	9322	10105	11282	11893	13863	15805	16588	18316	19532	21042	22585	24191	24874	26497	28439	28953	30939	31236	32189	32576	33247	33055	33830	33638	33987	33446	32981	33743	32964	32558	31416	30303	30156
E9	7792	4868	4006	3564	3245	3158	3119	3144	3648	4072	4346	5013	5442	6365	7527	7936	9515	10523	11587	12891	14019	15149	16074	18322	19479	20153	22139	24208	25473	26076	27786	29557	29830	31573	32382	32076	32336	33947	35235	34043	34089	33370	33637	33755	32426	31802	31916	30729	30327
F7	7067	5018	4253	4130	3407	3462	3720	3770	3657	4461	4878	5228	5834	7223	7773	8701	9665	10927	12481	13634	15164	16707	17875	19987	21007	23330	24490	25769	27363	28788	30071	31242	33030	33109	34547	34606	35802	36149	36515	37103	38036	36136	35947	36248	35261	34346	33520	33528	32062
F8	6974	5160	4252	3511	3408	3100	3102	3559	3971	4497	4835	5328	5646	6621	7714	8380	9607	10468	12081	12681	14025	16038	17508	18798	21307	22108	24737	25273	26210	28983	30003	31784	32304	33009	33538	34603	34998	36033	35179	35987	36075	35891	35538	34735	35418	34004	33157	32883	32126
F9	6903	5138	4427	3532	3427	3274	3210	3470	3734	4265	4442	5541	5597	7100	7463	8345	9339	10991	12238	12748	14207	15873	17210	18961	20873	22078	23482	24980	26257	29412	29310	30357	30988	33305	33946	34463	34746	36201	35463	35957	36337	36610	36113	35937	34634	34309	33171	32043	31226
G7	7117	5079	4114	3663	3377	3055	3160	3440	3798	4259	4632	5306	6196	7071	7723	8380	9903	11038	12129	13357	14874	16510	17548	19686	21782	22199	24598	26129	26686	28808	30787	32020	32705	34340	35470	35207	36280	36393	36376	37120	37284	37090	36202	35950	35336	34879	34437	32755	31918
G8	7021	5050	4182	3359	3269	3352	3284	3446	3834	4214	4607	5257	5794	7020	7364	8431	9285	11288	12839	13330	15615	16494	18571	19336	21151	22166	24402	25786	26882	28592	29480	31812	32883	33545	34913	35445	35446	35885	36737	36381	37109	36463	36783	36187	35236	34900	34543	33312	31551
G9	7082	4754	3756	3439	3133	3313	3209	3741	3643	4354	4575	5361	6258	6871	7904	8432	9902	10970	12747	13287	14273	16582	18153	19691	21197	23041	24665	26391	27318	28946	30501	30915	33444	33501	34478	35180	35631	36362	37299	36203	36625	36759	36781	36169	35495	34582	33857	32681	32354
H7	7078	5136	3867	3619	3168	3282	3374	3745	4121	4274	4587	5415	6320	7052	7724	9123	9803	10872	13027	13612	15494	17007	17904	19266	21798	23255	24753	26676	27583	28716	29789	31952	33607	34703	34849	35795	36937	36549	36914	36930	37359	36071	37138	35991	35334	35647	34670	33071	32327
H8	7289	4751	4209	3560	3234	3113	3313	3441	4021	4497	4855	5104	6376	6846	7804	8821	9995	11183	12482	13481	14974	16897	18100	20001	21768	22586	25014	26147	27639	28685	30616	32762	33266	34378	35220	34747	36411	36853	37958	37196	37104	36871	36361	35885	36287	35454	33584	34017	32278
H9	7035	5213	4136	3415	3521	3250	3336	3388	4080	4373	4847	5455	6177	6677	8043	8679	9729	11130	11789	14349	15397	17123	18467	19735	22054	23814	24103	26323	27055	28995	30861	31703	32648	34565	35526	36557	36326	37722	37093	37959	37601	37660	36670	37179	36044	35749	35889	33881	33056
															TMR int.	SiR int.	Ratio (TMR/SIR)			[NAD+] (M)	Mean Ratio (TMR/SIR)	SD
														A7	14068	22834	0.616099			0.02	0.638785	0.0197608
														A8	14401	22079	0.652249			0.002	0.755436	0.0034452
														A9	14273	22026	0.648007			0.0004	0.983503	0.162194
														B7	15446	20554	0.751484			8e-05	1.98616	0.0349693
														B8	15453	20413	0.757018			1.6e-05	3.33506	0.166585
														B9	16236	21425	0.757806			3.2e-06	4.09259	0.185896
														C7	20159	18969	1.06273			3.2e-07	4.26631	0.0716637
														C8	19415	17798	1.09085			3.2e-08	4.31506	0.119989
														C9	16572	20795	0.796922
														D7	27572	13818	1.99537
														D8	27374	13581	2.01561
														D9	27680	14213	1.94751
														E7	33796	9851	3.43072
														E8	33055	10518	3.14271
														E9	33947	9892	3.43176
														F7	36149	9267	3.90083
														F8	36033	8778	4.10492
														F9	36201	8474	4.27201
														G7	36393	8380	4.34284
														G8	35885	8433	4.25531
														G9	36362	8656	4.20079
														H7	36549	8675	4.21314
														H8	36853	8601	4.28473
														H9	37722	8482	4.4473
[truncated: 152 more columns]

## Sheet: GTP
Titration of NAD-Snifit with NAD+ and a fixed concentration of 1 mM GTP
Wavel. (nm)	540	541	542	543	544	545	546	547	548	549	550	551	552	553	554	555	556	557	558	559	560	561	562	563	564	565	566	567	568	569	570	571	572	573	574	575	576	577	578	579	580	581	582	583	584	585	586	587	588
A10	7690	4832	3752	3326	2816	2310	2236	2287	2028	2544	2718	2972	2983	3389	3841	4326	4620	5006	5775	5750	6281	6965	8120	7652	9149	9349	9820	10766	11109	11745	12529	12910	13089	14139	13721	13769	14036	14275	14337	15164	14370	14311	14892	14039	14581	14181	13751	13042	12590
A11	6866	4617	3586	3341	2857	2412	2425	2451	2231	2678	2626	2851	3192	3610	3786	4299	5044	5558	5695	6136	6627	7451	8226	8445	9149	9695	10628	11067	11675	12421	12817	12836	13273	13586	14374	14689	15425	14723	14988	15004	14980	14461	14609	14121	14206	14106	13434	13551	13491
A12	6956	4628	3596	3274	2623	2629	2127	2390	2202	2644	2510	3056	3190	3378	3788	3860	4565	4754	5216	5405	6457	6919	7310	7809	8930	9272	9229	9896	10552	11033	11559	12040	12460	12942	13234	13654	13371	13985	14114	14196	13663	13395	13525	13827	12923	12834	13202	12724	12171
B10	6981	4782	3733	2934	2565	2219	2216	2238	2326	2487	2496	2797	3351	3337	4096	3969	4493	5271	5630	6525	6543	7503	8079	8915	9351	10187	11255	11953	12096	12808	13611	14326	14485	15118	15427	15492	15503	15761	15966	16029	15434	15206	15956	15645	14951	14843	14061	14173	13890
B11	6753	4465	3323	2964	2746	2274	2234	2072	2168	2273	2664	2770	2976	3506	3946	4371	4929	5213	5873	6062	7136	7630	8308	8532	9815	10405	10899	11439	11924	12578	13060	13425	13674	14705	14666	14762	14826	15582	15898	14873	15502	15518	15343	14787	15429	14571	14509	13994	14126
B12	6802	4274	3566	2803	2450	2426	2100	2342	2215	2304	2530	2783	3375	3414	3919	4702	4569	5391	5716	6222	7334	7596	8294	9436	9845	10475	10524	11863	12630	12669	13272	13867	14756	15310	15100	15627	15533	16047	15938	16148	16212	15647	15483	15309	15192	14332	14728	14231	13837
C10	7021	4641	3443	3153	2734	2503	2407	2272	2485	2902	3092	3483	3565	4267	4529	4858	5809	6148	6976	7644	8924	9229	10319	11364	11979	12488	14453	14220	15091	16220	16598	16912	17526	19090	18120	19058	20669	20207	19880	20005	19786	20383	19944	19050	19428	19298	18964	18063	17533
C11	6896	4797	3616	2819	2559	2696	2514	2588	2505	2895	3095	3276	3729	4100	4749	4948	5902	6343	7346	7727	8376	9467	10073	11132	12523	12928	13982	13950	15616	16104	16344	17151	18092	18347	18769	19802	19587	20194	19712	20632	20052	19933	20216	19725	20185	18455	18257	18165	17772
C12	7099	4560	3739	2785	2637	2673	2545	2371	2477	2750	3184	3490	3763	4438	4545	5319	5763	6590	7005	7844	9006	9402	10106	11070	12330	12890	14156	14398	15643	16218	17521	17749	18167	18919	19076	20142	19669	19952	20166	20329	19890	20202	19998	19893	19937	18833	18598	18684	17387
D10	6919	5175	4016	3366	2999	2735	2616	3012	3137	3177	3876	4374	5007	5358	6264	6862	7615	8705	8938	10525	11435	12126	13872	15049	16569	17949	18306	19541	21057	22071	23871	24920	24739	25364	25992	27325	27745	27378	28986	27565	28008	27422	27848	28057	27562	27095	24908	24990	24955
D11	7034	5245	3668	3274	3157	2722	2847	2975	3216	3703	3759	4352	4760	5199	6008	6828	7916	8863	9574	10172	12146	12873	13880	15235	16860	17394	19334	20237	20694	22403	23843	24623	25080	26036	26823	27145	28359	28273	27831	28535	28721	27226	27794	28268	27310	27245	26371	25655	24827
D12	7053	5039	3848	3147	3017	2779	2533	3012	3234	3711	3886	4426	4876	5263	5865	6668	7463	8252	10049	11006	11646	12647	13588	15301	16191	17318	19038	19993	21958	22803	22159	23902	24689	25990	26900	27549	27159	27965	27212	27858	28113	27890	28466	27052	27430	27134	27012	24982	25685
E10	6886	4607	4301	3460	3042	3129	3416	3369	3404	4087	4375	5063	5860	6281	7518	7722	9188	10119	11825	12738	14349	15612	16503	18264	19747	21412	22914	24204	24956	27952	28442	30200	30253	31215	33244	32995	33719	34059	35158	34281	35524	34245	33987	34138	33201	32601	31853	30971	30263
E11	6846	5260	4184	3279	3472	2982	3071	3479	3617	4145	4535	5031	5729	6580	7192	7715	9091	10467	11559	12526	13978	15504	16085	18336	20163	21488	22450	24624	25276	27537	28476	29687	30566	32236	32966	32562	33420	33820	34384	34526	35188	34213	34445	34082	34005	32447	32653	30997	31179
E12	7082	4786	4033	3524	3259	2898	3133	3294	3681	4222	4473	4934	6046	6511	7268	7813	9350	10591	12400	12881	14431	15828	17309	19109	20437	21406	23355	24762	25895	27569	28318	29808	31461	31989	33462	34259	32987	35163	35625	34707	35314	34799	35132	34072	33567	32450	32192	31448	30346
F10	6889	5215	4207	3497	3349	3069	3301	3428	4000	4327	5047	5680	6082	6924	8137	8705	9992	11225	12126	13765	14932	16472	17526	19923	21295	22350	24414	25926	26919	28731	30532	32823	33239	34015	35320	35424	36674	37147	36899	36900	37332	37842	37136	36613	36024	33751	35190	33541	32520
F11	7043	5273	3932	3724	3137	3041	3202	3216	3702	4108	4679	5362	6264	6699	7699	8867	9281	11285	12712	13117	14828	17387	16943	19854	21775	22851	24787	26566	27929	29098	30066	31669	32682	34444	35267	36137	36199	36517	37098	37051	38230	36519	37274	36024	35410	35458	34581	33470	33126
F12	6842	4925	4090	3324	3167	3280	3220	3338	3979	4226	4509	5212	6039	6860	7530	8467	9493	10900	11878	12588	14081	17307	17886	19108	20975	22644	24333	25463	27833	29068	30358	31126	31986	33940	34469	36373	35651	35858	35265	36651	36478	36244	36147	35805	35269	35087	34701	32810	33041
G10	6377	5385	4277	3582	3246	3047	3250	3664	3673	4475	4897	5693	6545	7294	7882	8326	9763	11254	12746	13859	14795	17510	18296	19121	21432	22976	25245	27023	27211	30050	31330	31812	32787	34997	34985	35934	36254	37307	38263	38360	37332	36784	36401	36106	36102	35985	34894	34898	33052
G11	6874	5104	3990	3680	3434	3131	3253	3526	3826	4236	4751	5669	6335	7188	7893	8728	10333	11667	13155	13705	15147	16443	18203	19653	21945	23280	24490	25957	27447	30284	31140	32038	32852	33833	34944	37186	36984	38141	37950	37602	37361	37522	37119	36047	35569	35850	35511	34292	33091
G12	7011	4896	4259	3470	3106	3242	3448	3619	3633	4317	4631	5436	6098	6638	7998	8594	9930	11031	12217	13571	14855	17002	17740	19584	21529	22362	24665	24771	27670	28713	29846	31294	32890	33357	33723	35717	36255	36294	37530	36639	36745	37081	36425	36627	35299	35285	35305	32383	32743
H10	6141	5465	3881	3359	3291	3446	3343	3426	3998	4492	4524	5434	6348	7031	7807	8732	9926	11832	13149	13766	15859	16906	18727	20613	22840	23993	26187	26620	29017	30514	31704	32894	33597	34581	36173	36673	37100	37500	37787	39158	37896	38279	37738	37695	37154	36345	35387	35022	33733
H11	6818	4872	3697	3722	3189	3111	3459	3648	3898	4119	4881	5451	6370	7098	8187	9056	10486	10948	13100	14060	15891	17077	18168	20023	22417	23949	26052	26653	28525	29895	31630	32196	33813	34911	35888	36512	36976	37925	38987	39070	37922	38396	37844	37396	37084	36657	36005	33847	33596
H12	6892	5075	3983	3725	3339	3244	3446	3672	3749	4707	5133	5811	5952	7149	8263	8740	10023	11290	13359	14283	16165	18155	18994	20180	22714	24463	25659	26999	28586	30286	32083	33527	33238	36477	36311	37735	38116	37609	39005	39550	39287	39864	38251	38559	38770	37794	37007	35477	34345
															TMR int.	SiR int.	Ratio (TMR/SIR)			[NAD+] (M)	Mean Ratio (TMR/SIR)	SD
														A10	14275	22262	0.641227			0.02	0.64708	0.0117527
														A11	14723	22287	0.660609			0.002	0.751182	0.00949344
														A12	13985	21872	0.639402			0.0004	1.09455	0.038797
														B10	15761	20815	0.757194			8e-05	1.90259	0.0693316
														B11	15582	21050	0.740238			1.6e-05	3.30631	0.050083
														B12	16047	21223	0.756114			3.2e-06	4.0818	0.0891054
														C10	20207	19240	1.05026			3.2e-07	4.11184	0.101175
														C11	20194	18179	1.11084			3.2e-08	4.17106	0.16063
														C12	19952	17774	1.12254
														D10	27378	14959	1.8302
														D11	28273	14809	1.90918
														D12	27965	14207	1.9684
														E10	34059	10241	3.32575
														E11	33820	10408	3.24942
														E12	35163	10516	3.34376
														F10	37147	9209	4.03377
														F11	36517	9068	4.02702
														F12	35858	8569	4.18462
														G10	37307	9325	4.00075
														G11	38141	9084	4.1987
														G12	36294	8775	4.13607
														H10	37500	8687	4.3168
														H11	37925	9035	4.19757
														H12	37609	9405	3.99883
[truncated: 152 more columns]

## Sheet: NMN
Titration of NAD-Snifit with NAD+ and a fixed concentration of 100 uM nicotinamide mononucleotide
Wavel.	540	541	542	543	544	545	546	547	548	549	550	551	552	553	554	555	556	557	558	559	560	561	562	563	564	565	566	567	568	569	570	571	572	573	574	575	576	577	578	579	580	581	582	583	584	585	586	587	588
A1	6654	4981	3948	3173	2803	2779	2427	2371	2365	2653	2655	3006	3050	3585	3849	4080	4573	4820	5639	6138	6813	7815	7294	8464	9078	9719	10155	10800	11312	11892	12860	12453	13507	13228	14063	14107	14774	14204	14418	14242	14732	14512	14256	14672	13895	14109	13280	13338	13575
A2	6793	4798	3858	3205	3048	2676	2346	2577	2656	2650	2907	2875	3392	3675	4256	4247	5370	5387	5797	5930	7145	7215	7770	8657	9359	9836	10930	11142	11663	12436	12895	13026	13698	13954	13961	14278	15228	14581	15320	15495	15456	15292	15528	15227	14400	14793	14343	13573	13162
A3	6486	5013	4074	3009	3270	2788	2785	2903	2950	2768	3136	3532	3656	4062	4457	4612	5121	5938	5988	6453	7346	7495	8065	8872	9703	10434	11069	11514	11915	12597	13450	13689	14104	14200	14318	15113	16078	15407	15221	15535	14892	15637	15319	14794	15069	14788	14357	14292	13889
B1	6428	4740	3539	2955	2686	2473	2246	2383	2293	2478	2602	3419	3610	3702	4355	4570	5063	5866	6602	7128	7671	8427	8970	9344	10788	11985	12505	12967	13772	14094	14705	15363	16068	16131	16871	16709	17439	17569	17742	17320	17569	17280	16826	17642	17362	17368	16385	15949	15253
B2	6709	4516	3506	3171	2469	2655	2349	2115	2247	2886	2594	3189	3175	3714	4158	4464	4840	5850	6509	6917	7459	8502	9368	10069	10531	11271	12601	12959	13862	13974	14369	15779	15760	15971	17006	16641	16846	16884	17304	17713	17379	17476	17645	17540	16791	16551	15905	15491	14655
B3	6420	4856	3591	2915	2544	2362	2233	2407	2546	2433	2811	3173	3050	3909	4343	4682	5220	5908	6273	6981	7865	8604	9089	9836	10960	10973	12148	12577	13319	14238	14273	15375	16124	16026	16197	16815	16935	17882	17441	17647	16995	18066	17115	16769	16225	16602	15823	16231	15561
C1	7260	4932	3664	3304	2926	2577	2659	2640	2888	3072	3402	3732	3991	4430	5137	5701	6101	6767	8125	8822	9537	10469	11581	12633	13588	14505	15088	15915	17189	17778	18865	19761	20745	21218	21628	22029	21772	22780	23249	22505	22216	22602	21346	22114	22165	21496	21550	20534	20087
C2	7237	4664	3849	2911	2494	2761	2806	2616	2929	3114	3058	3576	3978	4485	5329	5655	6748	7317	7883	8805	10312	10651	11258	13154	13656	14483	15462	16901	17931	18367	18864	20478	21135	21560	21746	22365	22857	22506	22756	23004	22735	22842	23088	23718	22225	21807	21728	21198	20962
C3	6905	4423	3532	3150	2778	2679	2456	2748	2763	3119	3306	3602	4238	4850	5033	5776	6010	7589	8038	8738	9885	10624	11986	12086	13682	14095	15972	16110	17529	18027	19528	19666	20757	20780	21645	22804	22524	22343	23111	22690	22649	22180	22258	21884	21485	22227	20959	20429	20142
D1	6524	4807	3953	3242	3078	3021	3020	3209	3419	3918	4212	4960	5421	6091	7014	7636	8471	9711	11225	11765	13244	14421	16083	17342	18384	20144	21552	22676	23661	25054	26396	26933	28226	29593	30096	30496	31696	31926	32150	32344	31256	31804	32445	31191	30961	31593	30175	28464	28728
D2	7438	4821	4134	3498	3128	3043	3229	3233	3823	3863	4330	4652	5425	6257	6921	7858	8467	9706	10692	11772	13142	14546	15850	17107	18271	19841	21240	23307	23988	24651	26678	26862	28211	29333	29948	29525	31023	32039	32431	32439	31344	31757	31306	31100	30703	30850	29497	28439	26842
D3	6272	5292	3944	3697	3270	3060	3012	3146	3420	3961	4193	4566	5217	6229	6814	7533	8561	9019	10848	11467	12702	14138	15630	16807	18163	19113	21612	22415	22806	24392	25497	26734	28305	29094	29982	30411	29940	31490	31175	31362	32175	31242	31283	30367	29847	29155	28700	28337	27867
E1	6818	5138	3688	3494	3257	3592	3579	3283	3777	4591	4606	5890	6175	7244	7889	9068	10028	11369	12114	13072	15806	16535	18723	19959	21982	23047	24541	26481	27933	29996	30949	31902	33185	33705	34799	35990	36076	38064	37256	37819	36708	36308	37201	36665	36448	35612	34002	33964	32235
E2	6423	5036	3994	3513	3269	3235	3475	3689	3664	4234	4790	5427	6292	6970	7798	8737	10021	10695	12410	13559	15383	16461	17779	18725	20662	22662	24778	26321	27086	28214	30781	31765	32327	33365	34495	35318	36817	35688	37003	37807	36637	35743	35701	35698	34985	34648	34261	32670	32194
E3	6564	4827	4119	3466	3217	3129	3405	3699	3746	4607	4793	5221	6272	7192	7652	8857	9835	11152	12072	13732	15047	16534	17815	19906	21782	22413	24251	26918	27972	29521	30594	31110	32762	33987	33963	35972	36076	36302	36937	36098	36773	37499	36949	36172	36041	34669	34654	32970	32529
F1	6727	4874	4260	3668	3600	3180	3365	3855	3986	4260	4796	5629	6143	7681	8063	9040	10128	11560	12948	14481	15885	17592	19746	21252	22427	23919	26098	27454	28744	30448	32104	33630	34651	36531	37198	37918	37760	38334	37899	38841	38240	38204	38605	37872	37547	38116	35419	36149	33838
F2	6587	5187	4215	3732	3341	3532	3489	3781	3862	4586	4891	5702	6802	7018	8536	8890	9976	11177	13330	14488	15549	17668	19048	21114	22721	23705	25554	27359	27935	30094	30995	33267	34646	35244	36829	37989	38307	37879	39552	38445	38616	38263	38476	38113	37582	37586	36144	34768	34951
F3	7065	4995	4155	3781	3372	3532	3399	3733	4038	4457	4967	5404	6496	7563	8200	9695	10567	11320	13222	14391	15723	17264	18609	20299	22469	23706	24547	28219	28437	30973	32338	33282	33948	36523	36616	37204	38126	37725	38724	40070	39560	37975	37959	38462	37883	36767	36099	35571	34512
G1	6381	4841	4118	3461	3417	3304	3630	3538	3815	4557	4894	6018	6525	7541	8188	9369	10852	11970	13653	14267	16192	18058	19966	21311	22883	24928	26321	28650	29391	31275	32901	34380	35598	36934	37386	38236	38499	40306	40060	39525	39789	40311	39580	38707	37804	37850	36899	35299	34816
G2	6502	5198	4153	3768	3562	3626	3748	3728	4104	4873	5259	5850	6880	7534	8221	9002	10755	11523	13694	14312	16670	17376	19086	21128	23241	25348	26893	27721	29678	31521	33091	34566	35137	35940	37590	37602	38919	40006	40142	40759	39467	39760	38945	38511	38256	36829	37094	35983	35632
G3	6535	5005	3844	3507	3273	3251	3440	3876	4491	4601	4725	5734	6532	7560	8428	9507	10619	11398	13749	14678	16276	18608	19859	21130	23501	24360	26068	28195	29986	31746	33556	34637	35068	37167	37097	39518	39569	40083	40664	40091	40311	40767	40053	39179	39105	37975	37212	36995	35782
H1	6122	4933	4459	3760	3712	3198	3086	3811	3889	4931	5490	5885	6644	7320	8342	9220	10757	11835	13575	14808	16378	18952	19338	22002	23620	25805	26910	29131	29367	31717	34138	34392	36660	37172	38921	39495	39832	40490	40935	41141	40884	40758	40385	39241	37828	39295	38079	36950	36329
H2	6332	4947	3954	3826	3441	3420	3772	3901	4129	4896	5171	5696	6501	7589	8490	9226	10914	12097	13429	14387	16083	18465	19247	22856	23544	23844	26809	28538	29726	31611	33873	35025	36135	37366	38259	38264	39733	40612	40284	41060	40564	39684	39278	40521	38477	38164	37217	36391	35590
H3	6419	4975	3860	3933	3457	3522	3393	4067	4338	4760	5104	5890	6588	6969	8500	9881	11265	11852	13529	14946	17281	19008	20113	21727	23772	24740	27266	29513	30576	31670	34271	35102	36189	37448	38684	39215	39659	39402	42436	40945	39730	40036	39574	39934	38728	39617	37382	37202	35757
															TMR int.	SiR int.	Ratio (TMR/SIR)			[NAD+] (M)	Mean Ratio (TMR/SIR)	SD
														A1	14204	21711	0.654231			0.02	0.651602	0.00670561
														A2	14581	22642	0.64398			0.002	0.825955	0.0208009
														A3	15407	23465	0.656595			0.0004	1.25198	0.0368559
														B1	17569	21716	0.809035			8e-05	2.35089	0.0430267
														B2	16884	20599	0.819651			1.6e-05	3.6409	0.156906
														B3	17882	21058	0.849178			3.2e-06	4.2778	0.198596
														C1	22780	17610	1.29358			3.2e-07	4.48045	0.289371
														C2	22506	18396	1.22342			3.2e-08	4.61497	0.208486
														C3	22343	18034	1.23894
														D1	31926	13345	2.39236
														D2	32039	13891	2.30646
														D3	31490	13378	2.35386
														E1	38064	10400	3.66
														E2	35688	10269	3.47531
														E3	36302	9585	3.78738
														F1	38334	8714	4.39913
														F2	37879	8637	4.38567
														F3	37725	9318	4.04862
														G1	40306	8448	4.77107
														G2	40006	8934	4.47795
														G3	40083	9561	4.19234
														H1	40490	8492	4.76802
														H2	40612	8642	4.69938
														H3	39402	9001	4.37751
[truncated: 152 more columns]

## Sheet: Nicotinamide
Titration of NAD-Snifit with NAD+ and a fixed concentration of 100 uM nicotinamide
Wavel. (nm)	540	541	542	543	544	545	546	547	548	549	550	551	552	553	554	555	556	557	558	559	560	561	562	563	564	565	566	567	568	569	570	571	572	573	574	575	576	577	578	579	580	581	582	583	584	585	586	587	588
A4	6795	4950	3771	3268	3001	2357	2367	2128	2427	2371	2771	3051	3368	3195	3528	4030	4848	5303	5571	5875	6654	7130	7836	8405	9378	9388	10112	10633	11140	11631	12017	12439	13687	13405	13791	14062	14296	14475	13927	14427	14389	13825	14618	14212	13624	14210	13662	13092	12654
A5	6928	4937	4108	3359	2897	2671	2673	2575	2803	2793	2648	3016	3217	3757	3889	4272	4677	4944	5873	6426	6457	7589	7676	8471	9592	9392	10129	11046	11772	12129	12599	12859	13211	13306	14096	14822	14540	14582	15246	15503	14906	14907	14905	14471	14188	14555	13510	13480	13315
A6	6542	5114	3954	3224	2878	2538	2526	2546	2520	2587	2710	2833	3309	3567	3943	4455	4894	5194	5247	6614	6704	7777	8354	8584	9148	9986	10543	11274	11373	12003	12399	13528	13345	14140	14432	14533	14080	15472	14870	14955	15334	15084	14595	14809	14359	15037	13969	12933	13282
B4	6987	4605	3485	3024	2556	2586	2382	2311	2286	2456	2665	3096	3268	3261	3901	4669	5315	5482	6035	6639	7736	7952	8627	9616	10497	11644	12153	12362	13133	13701	14404	14951	16075	15902	16990	16722	17195	16968	17678	16877	17703	17572	17303	16684	16411	16998	16443	15169	15537
B5	6393	5238	3790	3087	2578	2321	2488	2366	2485	2459	2837	2918	3315	3784	4280	4679	5300	5670	6151	6698	7419	8359	8585	9640	10130	11104	12275	12440	13494	13702	14616	15891	15338	15855	16323	16632	16652	17186	17316	16799	16654	16408	17524	17014	15939	17044	16007	15433	15141
B6	7306	4658	3677	3078	2805	2332	2067	2349	2158	2608	2776	2852	3219	3874	4044	4605	5069	5816	6456	6773	7689	8221	8779	9962	10403	10933	11962	12658	13136	14153	14504	15480	16065	15769	15742	16563	17315	17464	17731	17150	16982	17224	17134	17001	16563	16681	15758	16422	15048
C4	7300	4769	3687	3101	2900	2806	2546	2505	2990	2891	3283	4034	4102	4742	5102	5803	6463	7152	8594	8673	9690	10845	11613	13008	13348	13918	15477	16571	16930	18030	18436	20178	20406	21383	21688	21816	22598	23469	22566	22550	23071	22601	22486	22622	21844	21426	20705	20341	19498
C5	6766	4770	3833	3150	2784	2795	2495	2682	2996	3262	3136	3721	4056	4642	5143	5529	6457	7051	7826	8373	9448	10710	11375	12564	13340	14714	15242	16046	17320	19106	18960	20172	20886	21077	21337	21804	22119	22161	22513	22981	23719	22675	21795	22047	21456	20966	20907	20379	19899
C6	7365	4897	3904	2865	2623	2618	2568	2675	2591	3051	3354	3399	4111	4604	5418	5625	5908	6848	7724	8486	9366	10817	10814	12244	13309	14468	14973	16285	16945	18348	18401	19127	20017	20749	21398	21891	21632	22022	22194	23054	22332	23067	21986	22429	21958	21119	20767	20289	19671
D4	6745	5086	3620	3420	2814	2931	2923	3294	3527	3634	3765	4311	5191	5788	6981	7700	8262	9439	10451	11254	12405	13806	14262	16594	17271	18420	20150	22106	22648	24030	25668	25733	26673	28163	28984	28729	29839	29850	29846	30407	29776	30607	30445	30789	28361	29107	27596	27745	26771
D5	6939	4721	3980	3376	3043	2824	2955	2793	3158	3961	3864	4568	5338	5941	6698	7677	8470	9330	10361	11219	12787	14357	15230	16213	17871	19446	20563	22428	22780	24067	25513	25610	26999	28046	28876	29530	30213	30066	30172	30983	30523	30447	30572	29986	29324	29401	28110	27665	26869
D6	6615	5067	3833	3459	3520	2960	3178	3034	3431	4009	4102	4434	5278	5965	6437	7649	8055	9414	10482	11345	12262	14095	15283	16356	17511	19204	20928	22326	22789	24354	24972	26432	26939	28366	29213	30173	29691	30494	29885	30368	30726	29802	30763	29172	29718	29467	28862	27758	26683
E4	7010	5064	4170	3444	3569	3296	3121	3309	3850	4100	4599	5168	5850	6957	7649	8749	9202	10288	12016	13386	13651	16809	17497	19599	21195	22655	23820	25827	26496	28037	29868	30764	31716	32866	33206	34684	35031	36883	35646	36166	35748	35960	35762	34675	34794	34528	33802	32439	31635
E5	7432	5303	4181	3457	3615	3022	3640	3299	3778	4027	4731	5289	5932	6977	7519	8585	9148	11037	12067	12821	14297	16318	17239	18736	21443	22085	23952	25742	27434	29012	30450	30047	32494	33221	33460	33787	34697	35104	35234	36235	36439	35582	34419	34951	34551	33923	34409	31726	32028
E6	7225	5042	3858	3662	3110	3265	3180	3234	3714	4090	4377	5291	6174	7135	7853	8328	9540	10691	11968	12716	14600	15832	18047	18726	20975	21921	23969	25615	26162	28420	29466	31403	32790	32886	33630	34021	35112	35357	35814	36640	35717	35069	35658	34776	33770	33206	33365	31988	32719
F4	6724	4925	4041	3577	3280	3202	3381	3283	3526	4556	4538	5177	6274	6793	7723	9051	9701	11093	12404	13540	14930	17395	17895	19254	22016	21499	25057	26340	27299	29258	30768	31285	33142	33873	34470	35027	35829	36624	37051	36694	37228	36671	37043	35591	35345	34773	34793	33613	32750
F5	7041	5266	4083	3668	3399	3339	3158	3410	4056	4231	4834	5565	6114	7403	8108	9155	10346	11682	11974	13316	15054	17070	18180	20240	21660	23078	25110	27368	28188	29398	30875	31443	32891	34482	34514	35946	36914	38238	37030	37758	37630	37750	37433	35543	36121	35999	34986	33812	32722
F6	6324	5048	4100	3680	3314	3289	3230	3868	3860	4476	4762	5431	5952	7026	7696	8642	9696	11539	13095	13669	15509	16507	18322	19077	21470	22726	25030	26604	26516	29697	31232	30665	33379	34642	35150	35771	36759	36516	37575	38158	38254	36727	37027	37092	34921	34951	34751	33921	32964
G4	6563	5272	4581	3490	3660	3254	3297	3750	3898	4186	4773	5214	6490	7450	7983	9223	10491	11491	12941	13977	15723	17599	19208	20341	21690	23941	25644	28558	28414	30195	31899	32890	34243	35495	36171	36788	36716	38436	37942	38753	39388	38137	38749	38787	36664	36664	36352	34914	33798
G5	6727	5108	4283	3379	3342	3373	3349	3866	3696	4277	4864	5693	6337	7046	8181	9049	10380	11685	13655	13707	16833	17274	18004	19527	21366	22872	25228	27097	28655	30158	31021	33841	34166	35213	35832	37405	37643	38090	38408	38662	38226	37413	38102	38493	37398	36942	35295	35536	33223
G6	6663	5082	4033	3844	3459	3348	3493	3489	3931	4466	4909	5446	6204	7071	8173	8723	10079	11081	12861	13835	16129	17430	18933	20472	21732	24200	25805	28056	28533	30591	32070	33143	35000	35641	37027	37567	38033	37891	38431	38978	38342	38027	38098	37845	37361	37198	35106	34367	34844
H4	6592	4897	4012	3447	3499	3433	3352	3811	3869	4576	5221	5819	6677	7684	8189	10011	10744	11582	13182	14732	16194	17259	19799	21363	23542	24680	26255	27692	28654	31035	32979	34861	36018	36475	37577	38409	39826	38619	39064	39436	40329	40125	38839	38618	37927	37708	37125	35422	35008
H5	6420	5107	4102	3565	3511	3210	3525	3407	4343	4373	4749	5700	6403	7729	8096	9179	10260	11409	12785	13705	16187	17940	18171	20300	22722	23731	25025	27199	28717	30652	30812	33260	34163	36030	37187	36882	37962	38589	38866	37621	38867	39284	38720	37808	37559	37597	36493	34695	33720
H6	7426	5245	4191	3640	3380	3581	3416	3476	4056	4382	4882	5683	6539	7188	8004	8690	10724	11257	12736	13563	15277	17422	18512	20387	21890	22935	24773	26965	28042	29864	31510	32131	33442	34497	35563	36130	36982	37431	37610	37695	37754	38451	37769	36917	36146	36013	35306	33687	33353
															TMR int.	SiR int.	Ratio (TMR/SIR)			[NAD+] (M)	Mean Ratio (TMR/SIR)	SD
														A4	14475	21579	0.670791			0.02	0.667349	0.0181315
														A5	14582	22512	0.647743			0.002	0.842247	0.0249977
														A6	15472	22636	0.683513			0.0004	1.26898	0.0407636
														B4	16968	20261	0.837471			8e-05	2.39451	0.100471
														B5	17186	20959	0.819982			1.6e-05	3.60065	0.114779
														B6	17464	20090	0.869288			3.2e-06	4.07619	0.0935196
														C4	23469	18001	1.30376			3.2e-07	4.37352	0.140311
														C5	22161	17326	1.27906			3.2e-08	4.37083	0.301766
														C6	22022	17990	1.22412
														D4	29850	11890	2.51051
														D5	30066	12874	2.3354
														D6	30494	13045	2.3376
														E4	36883	9977	3.6968
														E5	35104	10106	3.47358
														E6	35357	9736	3.63157
														F4	36624	9203	3.97957
														F5	38238	9178	4.16627
														F6	36516	8944	4.08274
														G4	38436	8716	4.40982
														G5	38090	9029	4.21863
														G6	37891	8435	4.49212
														H4	38619	9242	4.17864
														H5	38589	8178	4.71864
														H6	37431	8880	4.2152
[truncated: 152 more columns]

## Sheet: NADH
Titration of NAD-Snifit with NAD+ and a fixed concentration of 100 uM NADH
Wavel. (nm)	540	541	542	543	544	545	546	547	548	549	550	551	552	553	554	555	556	557	558	559	560	561	562	563	564	565	566	567	568	569	570	571	572	573	574	575	576	577	578	579	580	581	582	583	584	585	586	587	588
A7	6340	4760	4194	3423	2888	2902	2449	2510	2338	2849	2591	2975	3255	3567	4181	4395	4708	4943	5134	6381	6879	6996	7852	8619	9201	9507	9938	11106	10633	11769	11916	13135	13528	13440	13226	13936	13894	14237	14711	14633	14377	14527	13722	13974	13346	13810	13243	13047	12824
A8	7047	4783	3706	3308	2692	2388	2343	2488	2477	2407	2753	3004	2910	3907	3954	3983	4304	5254	5774	6017	6251	7309	7434	7906	8552	9858	9957	10307	10920	11537	12360	12474	13273	13534	13846	14098	13836	13599	14222	14082	14332	14337	13769	13709	13658	13579	13543	12525	12649
A9	6674	4903	3621	2838	2805	2411	2521	2210	2335	2963	2843	2771	3259	3461	3553	4385	4680	4970	5753	6223	6402	7081	7682	8062	8750	8899	9725	10698	10326	11080	11541	12345	12119	13092	13704	13221	13727	13747	13956	14123	14146	14206	13857	13886	13895	13381	13027	12944	12152
B7	6661	4398	3513	2895	2744	2445	2373	2314	2236	2458	2495	2913	3427	3688	4225	4423	4732	5420	6324	6606	7442	8524	8876	9365	9752	10703	10781	12144	12777	13198	13906	14074	14985	14929	15425	16627	15992	16210	16235	16594	16178	16225	16201	15605	15931	15778	15487	15041	14234
B8	6415	4759	3499	3017	2658	2260	2102	2461	2358	2678	2613	2701	3321	3834	3919	4373	4730	5297	5914	6283	7041	8022	8959	8750	10057	9987	10985	11747	13133	13236	13352	14184	14545	14705	15469	15767	15674	15952	15570	16218	16183	16061	15588	15406	15050	15255	14898	14599	14307
B9	6053	4564	3732	2898	2691	2203	2110	2475	2148	2538	2621	2725	2989	3719	3710	4559	4846	5386	5989	6288	7158	7749	8619	8951	9937	10967	11172	12145	12965	13397	14161	14116	15088	15628	15466	15928	15174	16667	16053	16867	16516	16244	16215	15506	15836	15400	15004	14471	13817
C7	6906	4646	3451	2859	2846	2552	2407	2580	2538	2983	2934	3855	3637	4404	5066	5873	6277	6506	7663	8402	9146	9737	11063	11694	13252	13426	14066	15280	16069	17006	17643	18194	19590	19929	20535	20680	21181	20809	20779	21711	21459	21041	20962	21215	20527	20877	19850	19425	18244
C8	6807	4338	3739	2854	2708	2398	2439	2657	2485	3026	3292	3177	3854	4108	4507	5385	5905	6656	7542	7936	8942	9863	10268	11282	11961	12621	14823	15484	15366	17359	17815	18382	19235	19369	19846	19660	20120	20804	21006	21066	20359	20821	19622	20436	19988	20323	19046	19148	18373
C9	6438	4833	3615	3118	2896	2562	2642	2519	2881	3244	3333	3565	3865	4332	5044	5479	6291	6916	7329	8215	9794	9988	10679	11992	12985	13331	14136	15380	16524	17540	18302	17930	19161	19717	20396	20795	21228	21041	21073	21698	21246	21048	20612	21025	20068	20017	19252	18756	18410
D7	6591	4878	3857	3617	3067	2862	2889	2847	3308	3517	3641	4642	5260	5934	6314	7488	7798	9016	9887	10848	11722	13793	14226	15704	16680	18329	19263	20999	21431	23732	24098	26198	26402	26260	27546	28794	27923	29955	28198	29049	28615	28391	30631	28524	27900	27531	26857	26881	25634
D8	6591	5301	4227	3281	3022	3129	2962	3092	3590	3772	3947	4635	5155	6041	6263	7307	8191	9086	10498	11172	12484	14334	14785	16812	18146	19141	19990	21239	22359	23960	25850	25879	27834	27512	28142	29137	29746	31200	29324	30111	30581	30442	30446	30200	29405	28500	27733	26893	26984
D9	6788	5098	4061	3535	3086	2829	2844	3269	3372	3666	3807	4399	4766	5732	6767	7155	7755	8833	9741	10841	12289	13143	14674	15728	16836	18269	19629	20226	22844	22913	24775	25716	26411	27347	27398	28367	28552	28725	29721	30684	29442	29764	28429	28393	28232	27318	26760	26554	25471
E7	6979	5035	4064	3533	3212	3342	3479	3383	3808	3994	4117	5096	5966	6662	7539	8301	9681	10333	12303	12863	13904	15643	16952	18674	20526	21444	23297	25335	26289	28639	29154	30281	31088	31893	33023	33763	34120	34536	34205	35108	34578	34835	34946	34912	34132	33887	32746	31652	30948
E8	6751	4712	4116	3497	3295	3123	3376	3317	3548	4035	4506	5461	5576	6989	7503	8380	9413	10250	11630	12964	14795	16188	16854	18982	20582	21940	22927	25282	26646	28233	29602	28946	30831	32327	32799	34422	34446	34230	34675	35607	34670	35159	34597	34644	33108	33064	32567	31427	31288
E9	6855	4849	4245	3565	3011	3232	3301	3423	4019	3864	4830	5240	5829	7117	7423	8184	9226	10046	12258	13182	14358	16031	16515	18903	19594	21586	23803	24677	26649	27567	29358	30781	31299	32117	32914	33082	34390	34534	35260	34832	35986	34452	35385	34706	33998	32969	32579	31192	30722
F7	6632	4901	3965	3613	3244	3671	3149	3643	3731	4344	4585	5371	6600	7124	7905	8785	10123	11020	12394	13325	14970	17074	17849	19252	21771	22505	23939	26175	27785	30319	30764	33187	33364	34090	34850	35715	36634	35935	37572	36946	37192	36617	36273	35984	35961	36236	34168	33060	32826
F8	6644	5478	4151	3487	3247	3226	3192	3568	3615	4567	4571	5849	6246	7291	7498	8317	10247	11231	12661	13498	14853	16455	18179	19646	21154	22940	24204	25933	26658	28796	30346	31938	33448	34352	34909	35476	36458	36561	37407	36788	37594	37268	37375	36416	36282	34532	34252	33671	32919
F9	6729	5123	3700	3568	3555	3342	3386	3642	3798	4352	4711	5566	6263	7481	7773	8713	9947	11430	12221	13804	14889	17118	18114	19626	20932	22472	25239	26550	28007	28927	31117	32152	32876	33942	34981	35792	37111	36890	36901	37802	36817	36763	36274	35810	35773	34961	34209	33587	32846
G7	6840	4932	4256	3580	3336	3589	3482	3731	4081	4440	5083	5807	6265	7005	8411	8985	10345	11185	12441	13889	15136	16984	18363	19923	22388	24613	25483	26766	28677	29642	32362	32379	34810	36287	36570	36956	38022	38430	37372	38011	38681	38065	37109	37823	37091	36831	35875	33552	33972
G8	6900	5069	4148	3829	3454	3089	3320	3310	4042	4363	4659	5514	6322	7040	7839	9230	10307	11119	12808	13910	15316	17141	18069	20302	22120	23802	25285	27248	28177	29939	31491	32444	33535	35311	35872	37511	36465	37222	37802	38109	38398	38510	38048	37530	36015	36485	36368	34239	34487
G9	6728	5028	4159	3746	3253	3478	3265	3734	3751	4642	4584	5724	6421	7428	8144	9047	10472	11235	12716	13454	15179	17050	18393	19535	22341	23694	25876	27140	28482	30087	30947	32512	33974	34809	35844	37453	37214	37924	38006	39023	37834	38471	37911	37602	36705	35920	35183	34612	33519
H7	6492	5216	4116	3405	3354	3473	3515	3730	3938	4205	4693	5689	6201	7590	7923	8502	9596	11441	12865	13737	15709	17472	18469	20780	22093	23518	25685	27152	28510	30954	31695	32227	33420	35429	36729	37214	36983	38255	39262	39145	37797	38397	38101	37361	38376	36766	36268	34876	34023
H8	6371	5271	4122	3717	3418	3338	3269	3799	4235	4605	4975	5665	6007	7944	7850	9126	9974	11234	13039	13999	16282	17486	18783	20722	22922	23807	25166	27246	28565	31023	32689	33200	35046	35661	36743	37857	38649	38479	39242	39758	37907	38518	37364	37997	38013	36455	36464	35294	34799
H9	6435	5293	4162	3436	3344	3381	3459	3446	3775	4796	4647	5630	6276	7660	8286	9551	9706	11861	13064	14264	15702	17687	20208	20564	22351	23690	26166	28555	29244	30716	32546	33928	34632	35167	36783	37614	37928	38630	39835	39270	39261	38304	38314	39260	37703	38297	36334	35586	34883
															TMR int.	SiR int.	Ratio (TMR/SIR)			[NAD+] (M)	Mean Ratio (TMR/SIR)	SD
														A7	14237	22377	0.636234			0.02	0.62547	0.0181566
														A8	13599	22496	0.604507			0.002	0.780248	0.0150603
														A9	13747	21626	0.63567			0.0004	1.13542	0.0627664
														B7	16210	21249	0.762859			8e-05	2.02605	0.101402
														B8	15952	20224	0.788766			1.6e-05	3.30906	0.0677838
														B9	16667	21121	0.78912			3.2e-06	3.92915	0.171315
														C7	20809	18799	1.10692			3.2e-07	4.04649	0.0825567
														C8	20804	19052	1.09196			3.2e-08	4.12058	0.0683086
														C9	21041	17427	1.20738
														D7	29955	14082	2.12718
														D8	31200	16213	1.92438
														D9	28725	14174	2.0266
														E7	34536	10652	3.24221
														E8	34230	10134	3.37774
														E9	34534	10442	3.30722
														F7	35935	9511	3.77826
														F8	36561	8884	4.11538
														F9	36890	9474	3.89381
														G7	38430	9379	4.09745
														G8	37222	9099	4.09078
														G9	37924	9598	3.95124
														H7	38255	9367	4.08402
														H8	38479	9163	4.19939
														H9	38630	9472	4.07834
[truncated: 152 more columns]

## Sheet: NADPH
Titration of NAD-Snifit with NAD+ and a fixed concentration of 100 uM NADPH
Wavel. (nm)	540	541	542	543	544	545	546	547	548	549	550	551	552	553	554	555	556	557	558	559	560	561	562	563	564	565	566	567	568	569	570	571	572	573	574	575	576	577	578	579	580	581	582	583	584	585	586	587	588
A10	6773	4728	3571	3297	2757	2371	2375	2247	2615	2584	2530	3042	3135	3375	3428	4214	4527	5076	5239	5661	6331	6949	7696	8329	8773	9021	9735	10466	10571	11741	11748	12098	12458	12630	13122	14159	14625	13696	13752	13799	14081	14294	13785	13588	13359	13122	13413	12679	12283
A11	6294	5054	3632	3165	2828	2622	2429	2329	2644	2660	2576	2906	3317	3368	3619	4086	4562	4907	5268	6035	6436	7010	7197	7682	9013	9531	9908	10820	11104	11357	11597	12470	12942	13294	13587	13588	13501	13695	13914	14319	13970	13567	13612	14116	13323	12486	13304	13039	12653
A12	6897	4782	3478	3184	2893	2532	2482	2330	2406	2490	2714	2787	2951	3587	3551	4081	4302	4772	5172	6182	6534	6909	7273	7795	8573	9346	9360	9936	10778	10890	11697	11787	12285	12888	12667	12905	12867	13117	13230	13721	13906	13663	13569	13219	13696	13047	12951	12684	11736
B10	6164	4745	3563	2984	2689	2061	2046	2093	2309	2320	2599	2770	3180	3548	3710	4334	4320	5383	5665	6213	6808	7695	7870	8615	9573	10845	10530	11335	11377	12410	13119	14012	13985	14584	15468	14838	15371	15175	15591	15448	15364	15501	15713	14894	14973	14128	14123	13990	13410
B11	6310	4399	3314	2888	2282	2439	2345	2053	2156	2416	2521	2977	3103	3820	3529	4329	4805	4892	5280	6020	7082	7174	7795	8145	9100	9886	10541	11803	11742	12216	12929	13075	13432	14324	14414	14916	15146	15048	15285	15531	14900	15101	14740	15133	14567	14347	14124	13948	13380
B12	6278	4590	3595	3001	2458	2325	2504	2191	2206	2659	2683	2694	3310	3712	3871	4303	4947	5143	6053	6154	7188	7655	8447	8551	9494	10144	10572	11478	12598	12773	13904	14003	14493	15014	14698	15310	15036	15938	16863	16295	15268	15856	14605	15241	14866	14737	14797	13961	14009
C10	6437	5235	3582	3144	2693	2468	2261	2319	2439	2855	3067	3012	3576	3953	4767	4939	5659	6632	7052	7577	8154	9179	10159	11402	12035	12316	13662	14234	14891	15457	17367	17400	18146	18470	18739	18885	18836	20749	19463	19682	19847	19632	20299	18831	19025	18725	18410	18471	17522
C11	6400	4767	3795	3142	2524	2686	2343	2469	2521	2641	3077	3559	3577	4214	4502	5127	5750	6310	7390	7546	8635	9274	9853	10965	11738	12831	13745	14492	15431	15645	16970	16872	18539	18077	18779	19360	19192	19935	19861	19650	19884	19576	19529	19296	18966	18697	17872	18392	17335
C12	6759	4918	3513	2987	2889	2667	2294	2367	2392	2905	2983	3559	3653	3834	4723	5043	5786	6556	7230	7606	8464	9466	10457	11641	12296	12857	13688	14855	15342	16361	16599	17264	17711	19243	18970	20032	19626	20261	19757	20030	20158	19770	19971	19512	19855	18542	18316	18112	17344
D10	6484	5202	4033	3379	3199	2763	2590	2867	3362	3526	3683	4328	4992	5623	6169	6947	7528	8626	9505	10227	11567	12783	13788	14535	16367	17239	18220	19915	21133	22025	22919	23960	24822	25977	25668	27096	27672	27375	27403	27608	27705	27109	26639	26823	27195	26797	26122	25147	25195
D11	6140	4995	3910	3200	2758	2825	3063	2985	3231	3477	3611	4379	4927	5329	5996	6473	7136	8703	9526	10428	11506	13387	13807	15095	16226	17683	19414	19952	21178	22493	23939	24327	24926	26282	26843	27261	27973	27311	29161	28347	28941	28205	28007	27658	27921	26640	25781	25892	24931
D12	6624	5116	3770	3333	2854	3075	2740	3026	3061	3328	3475	4519	4873	5728	6205	7197	8039	8736	9761	10742	11796	13082	14111	15050	16417	17553	19214	20831	21383	22395	23464	24512	25473	26049	26858	26797	27309	28306	28185	29139	28179	27842	27755	28024	26835	26383	26229	26208	24841
E10	6965	5064	3717	3490	3124	3340	3238	3391	3663	4327	4619	5217	5376	6355	7296	8306	9205	10272	11013	11890	13975	15166	16620	18351	19909	21629	23108	24044	25287	27061	28335	29068	30648	31704	31964	32473	33393	34011	34016	34264	34711	33975	33966	33513	33175	33523	31552	30718	30405
E11	6388	5628	4227	3569	3194	3124	3256	3116	3498	4181	4867	5166	5464	6466	7304	8072	9291	10502	11891	12262	14190	15670	16594	18540	19514	21137	23668	24697	24985	27317	28744	29849	30805	32057	32583	32647	33526	33942	34480	34836	34609	34707	35097	32971	33590	33022	32407	31662	30257
E12	6636	5531	3919	3329	3473	2987	3089	3310	3635	4197	4307	5134	6103	6724	7226	8423	8985	10747	11981	13164	14250	16046	17050	18903	20114	21766	23609	24981	25437	27570	28920	30893	31239	32601	32050	34521	33515	34518	35388	34719	35119	35344	35555	34976	34063	33338	31358	30815	30637
F10	6713	5423	3930	3544	3337	3342	3291	3531	3905	4404	4716	5549	6081	7400	7837	9244	9785	10972	13142	14204	15052	17329	18910	20036	22087	23421	25369	27155	27973	30409	31537	32303	33084	35022	35593	36290	36981	37089	37006	37982	38777	37955	37715	36887	35780	35724	35353	34437	32728
F11	6527	5406	4483	3829	3360	3602	3260	3322	3980	4204	4829	5530	6351	7188	7874	8880	9197	10919	12637	13975	15380	16815	17695	19857	20897	22481	24848	26262	26925	29488	31125	31631	33134	35234	35244	35817	36469	36871	37799	38624	37517	36925	36446	35661	36593	35371	34546	33961	32904
F12	7001	5271	4165	3733	3597	3309	3440	3228	3898	4290	4714	5312	6079	7430	7672	8856	9979	10709	12399	13370	14797	16630	18243	19420	21544	23404	24902	27155	27076	29923	30206	30676	32667	34119	34433	35753	36747	36782	36463	37186	37479	37344	37103	35995	35754	35588	33893	33798	32723
G10	6695	5091	3895	3877	3429	3496	3405	3795	3789	4351	4763	5208	6248	6876	8353	9348	9792	11212	12133	13715	15203	16679	18677	20301	22224	23544	25067	26821	28001	29613	31598	32032	33533	34591	35120	36256	37059	37344	37885	37040	38170	38340	37671	36855	35958	35838	35482	34482	33626
G11	6297	5441	4060	3666	3409	3222	3625	3751	3674	4290	4898	5542	6294	7014	8091	8871	10628	10855	13562	13594	16152	17407	18470	20179	22270	23591	25520	27504	28335	30098	31463	32865	34283	35150	35480	37130	37241	37659	38313	37456	38614	37734	38015	36819	36647	36522	35244	34728	34036
G12	6440	5086	4054	3579	3596	3381	3138	3423	4126	4183	4638	5605	6117	7357	7486	8682	10081	11002	12324	13285	15210	16942	18495	20059	21513	23165	25026	26987	27486	29093	31135	32914	33009	34670	35699	36077	37810	38174	37349	38025	38174	37859	36934	37819	36626	35418	34808	32990	32959
H10	6775	5014	4060	3563	3286	3069	3307	4101	4070	4547	4660	5532	6426	7333	8283	9175	10061	11271	12947	13916	15568	16770	18980	20178	22783	23412	26284	27156	28362	30588	32299	33265	34048	34893	36419	36820	37937	38034	39213	38799	38546	38602	38417	37608	36808	37059	35799	34532	33629
H11	6575	5000	4065	3737	3550	3615	3381	3802	4075	4418	4534	5800	6334	7612	8173	9043	10501	11277	13147	14478	15918	17988	18524	21139	22516	24025	25710	27836	28600	31013	32124	33020	34480	35342	36992	37237	37864	37837	39983	39583	38792	39553	38323	37735	37497	36907	36037	35297	34747
H12	6705	5022	4075	3631	3403	3158	3553	3777	3868	4260	4728	5721	6204	7682	8127	9076	10531	11690	12704	13765	15620	17742	18192	20558	21954	23857	25020	27650	28669	30421	31928	32963	34203	35911	36688	36979	37469	37515	38446	37788	39094	38664	37756	37801	37921	36808	36048	34971	34116
															TMR int.	SiR int.	Ratio (TMR/SIR)			[NAD+] (M)	Mean Ratio (TMR/SIR)	SD
														A10	13696	22239	0.615855			0.02	0.610593	0.00534578
														A11	13695	22423	0.610757			0.002	0.743764	0.024356
														A12	13117	21675	0.605167			0.0004	1.06839	0.0256098
														B10	15175	20692	0.733375			8e-05	1.87819	0.0535635
														B11	15048	20718	0.726325			1.6e-05	3.22938	0.0857543
														B12	15938	20656	0.771592			3.2e-06	3.90513	0.0551665
														C10	20749	19394	1.06987			3.2e-07	4.17781	0.074607
														C11	19935	18235	1.09323			3.2e-08	4.17819	0.123624
														C12	20261	19443	1.04207
														D10	27375	14590	1.87629
														D11	27311	14960	1.8256
														D12	28306	14646	1.93268
														E10	34011	10231	3.32431
														E11	33942	10586	3.20631
														E12	34518	10932	3.15752
														F10	37089	9655	3.84143
														F11	36871	9366	3.93669
														F12	36782	9342	3.93727
														G10	37344	8979	4.15904
														G11	37659	9153	4.11439
														G12	38174	8961	4.26002
														H10	38034	8838	4.30346
														H11	37837	9328	4.05628
														H12	37515	8986	4.17483
[truncated: 152 more columns]

## Sheet: NADP
Titration of NAD-Snifit with NAD+ and a fixed concentration of 100 uM NADP+
Wavel.	540	541	542	543	544	545	546	547	548	549	550	551	552	553	554	555	556	557	558	559	560	561	562	563	564	565	566	567	568	569	570	571	572	573	574	575	576	577	578	579	580	581	582	583	584	585	586	587	588
A7	6116	5401	4011	3514	3150	2547	2653	2590	2960	2836	2847	3086	3398	4165	4432	4422	5271	5774	6296	6987	7379	8486	8462	9597	9890	10557	11376	11761	12349	12958	13286	14506	15112	15281	15679	15873	15572	16403	16155	16200	15963	16593	16256	16119	15322	15709	15304	15030	14673
A8	6552	5105	3899	3389	3043	2744	2835	2842	2807	2988	2951	3213	3606	4145	4396	4694	5363	5503	6184	6810	7456	8641	8650	9387	10290	11181	11713	12373	12532	13258	14218	15140	15399	15632	15705	16743	16592	16719	16606	17149	17187	16834	16914	16418	16187	15847	14815	14944	14389
A9	6732	5455	3891	3520	2981	2913	2653	2553	2922	2954	2877	3168	3513	3771	4425	4536	4951	5557	6138	7139	7230	8307	8808	9044	9901	10713	11739	12241	12772	13271	13613	14470	15005	14608	15361	15992	16435	16196	16308	16280	16126	15578	16018	16000	15729	15909	14415	15131	14556
B7	6281	4735	3593	2907	2760	2358	2384	2270	2627	2718	3064	3272	3628	4089	4611	5047	5487	6029	6796	7192	8172	9143	9265	10327	11403	12142	12721	13098	14710	15203	15691	17034	16744	16882	17693	18006	18953	18757	18273	18468	18933	19142	18527	18309	17936	17961	17046	16861	15949
B8	6431	4790	3760	3016	2519	2559	2331	2322	2462	2847	3078	3016	3377	4225	4781	4640	5668	5920	6823	7165	7994	9064	9148	10374	10838	11555	12352	13395	14038	15066	15823	16250	16607	17263	17023	17927	17562	17726	18866	18483	18364	18092	18276	17885	16986	18288	17273	16560	15363
B9	6418	4710	3744	2890	2705	2451	2338	2597	2249	2625	2706	3077	3687	3786	4323	5248	5718	5928	6680	7139	7942	9063	9487	9920	11497	11955	12617	13453	14342	14859	15645	15804	16800	17352	17970	17987	18592	18363	18838	19447	18333	18026	18403	18835	17972	17583	16815	16610	16969
C7	6560	4768	3862	3386	3270	2685	2783	2619	2918	3181	3770	4418	4686	4638	5208	6402	7400	7479	8432	9827	10305	11610	12301	14118	14692	15777	17418	17792	18979	19571	21076	21390	21545	23155	23742	23663	24034	24216	24838	24684	25224	25025	24271	23472	23899	24124	22505	21944	21721
C8	6493	5360	4019	3459	3096	2924	2937	3186	3052	3643	3670	4155	4527	5014	5653	6465	6627	7605	8725	9537	10440	12111	12579	13618	14652	15381	16811	17811	18890	19882	20522	21107	21844	23061	23107	23851	24176	23639	24591	24404	25450	24238	24115	23547	24354	23988	22530	22112	21686
C9	6560	4869	3977	3122	2791	2731	2649	2756	2852	3314	3483	4042	4479	5184	5600	6391	7354	7941	8656	9628	10380	11417	12313	12890	13965	15926	16527	17498	18434	19080	20257	21047	22502	22704	23478	24303	24158	24056	24664	24577	24434	24417	24881	24555	23626	23469	22007	21766	21593
D7	7141	4938	3942	3545	3208	3078	3216	3440	3461	3751	4312	4908	5499	6039	6986	7908	8613	9840	11012	12306	13063	15254	16063	17812	18612	20347	21440	23693	24383	25198	26646	28026	29085	30304	29965	31580	32057	32689	32758	32770	32059	32401	33035	32382	30624	31649	29934	29126	28922
D8	6518	5130	4005	3474	3252	3037	3095	3128	3886	4081	4302	4858	5109	6938	6796	8194	9117	9967	11429	12381	13562	15068	15923	17423	18224	19940	21464	22842	23674	25863	27247	27910	29122	30473	30577	30905	32332	32191	32758	32270	32617	33044	32895	31948	30621	31381	30133	29404	28743
D9	6285	5592	3869	3360	3205	3049	2899	3227	3257	4194	4699	4749	5566	6360	6873	7812	8894	10026	10988	12725	13588	15247	15759	17491	18810	20446	22475	23745	24334	25538	26837	27749	29072	29363	30719	31564	31556	31823	32852	31939	33596	33118	32344	31660	32183	31226	29660	29792	29038
E7	7493	5076	4233	3676	3177	3347	3619	3759	4228	4937	5021	5514	6146	7325	7698	8826	10907	11040	12663	13024	15399	16925	18983	20139	22506	23538	24942	26652	27852	29833	31460	32650	34477	35217	35091	36325	37332	37787	38379	38078	38115	37118	37654	37225	36589	35894	35347	34268	33125
E8	7152	5396	3967	3540	3430	3469	3285	3865	3847	4801	4906	5578	6570	7162	8113	9473	10494	11229	12857	13411	15273	17252	18385	20222	21782	22958	25728	26557	28558	30196	32115	32269	33968	33747	35836	36357	36287	38119	37644	37868	37508	37384	37498	36664	36913	35922	34569	34396	33900
E9	6981	5383	4348	3699	3479	3485	3468	3795	4010	4432	4597	5491	6481	7458	8035	8942	10395	10966	12389	13143	15676	16653	18193	19952	21721	22860	25021	27032	27344	29991	31674	31574	33169	35279	35096	36214	37013	37624	39141	36950	37727	37506	37482	37308	36387	35094	35022	34205	33067
F7	7280	5116	4348	3929	3924	3372	3574	3679	4149	4722	5218	5517	6656	8193	7908	9583	10555	11906	13960	14540	16045	18269	19450	21140	23880	24646	26917	28599	30767	31658	33895	35054	35538	36558	36647	38398	38632	40521	40298	40350	40558	40163	40943	38893	38647	38006	37666	37699	36269
F8	7161	5333	4176	3927	3418	3454	3385	3698	4468	4343	5477	5387	6547	7656	8130	8822	10609	11806	12598	14085	16968	17507	19295	20338	22906	24429	26687	28054	29034	31054	31985	33217	35261	36728	36940	37729	39169	38900	39186	39326	40079	39804	39432	39389	37245	37860	37224	35855	34039
F9	6946	4944	3944	3528	3564	3509	3483	3903	4106	4735	5057	5327	6442	7113	8388	9073	11102	11657	13065	13774	16006	17408	19004	20591	23648	24052	25323	27506	28869	31471	32661	34268	34870	36016	37158	37704	39427	38821	39859	39118	39624	39503	39407	39338	37336	37233	36840	35674	35153
G7	7341	5144	4336	3877	3436	3484	3751	3929	4033	4797	5155	5836	6883	7827	8304	9311	10803	12176	13714	14465	16988	17956	19632	21195	23396	25048	27348	29424	30268	31955	33316	34378	36904	36845	38000	38396	38887	41349	39739	40550	40515	40158	40824	39677	39169	39595	38104	36270	35133
G8	6933	5092	4458	3806	3304	3530	3633	3927	4166	4579	5045	6187	6616	7433	8611	9916	10631	11534	14069	14649	16063	18540	20033	21035	22877	26022	27024	29350	30321	31739	33032	34333	36414	37127	37269	39072	39612	39364	40411	40780	40847	40592	39737	40034	38364	38461	36942	35808	35254
G9	6622	5072	4074	3693	3233	3519	3677	3970	4292	4837	5365	5889	6304	8111	9006	10016	10576	12224	13832	15108	15740	18645	19355	21634	23718	25116	27564	28906	30357	32133	33756	35509	37192	37871	38687	39887	39639	40440	40685	41856	40311	40667	39878	39414	38638	38332	36886	37197	36997
H7	6579	5255	4079	3844	3409	3512	3786	4090	4370	4582	5273	5821	6859	7720	8572	10191	11059	12166	14396	14571	16799	18620	21087	22531	24030	25525	26464	28790	30403	32573	34212	35527	36648	38159	38638	40067	40356	40964	41517	41665	41544	41778	41164	40005	40015	39532	38918	38067	36496
H8	6608	5295	4477	3693	3445	3637	3860	3785	4770	4783	5109	5875	7007	7688	9136	9569	11487	12265	14230	14957	17433	19038	20891	22294	23842	26342	27148	30510	30913	32586	35720	35564	37325	38164	39269	40116	40550	41608	41535	42167	41742	41801	42161	40351	40293	39014	39847	36871	37003
H9	6962	5352	4716	3575	3496	3806	3603	3725	4347	4898	5305	6047	6446	7883	8781	9644	11787	12664	13424	15122	17718	18587	20388	22292	24030	25574	27740	29440	30809	32861	33326	34993	36957	37630	39870	40388	41840	41864	42051	42304	41914	42007	42168	41377	40286	39155	39184	36714	37536
															TMR int.	SiR int.	Ratio (TMR/SIR)			[NAD+] (M)	Mean Ratio (TMR/SIR)	SD
														A7	16403	22793	0.719651			0.02	0.709181	0.0136979
														A8	16719	23409	0.714212			0.002	0.844574	0.0188684
														A9	16196	23348	0.693678			0.0004	1.27925	0.0370747
														B7	18757	22585	0.830507			8e-05	2.44757	0.0520114
														B8	17726	21173	0.837198			1.6e-05	3.73	0.0246032
														B9	18363	21204	0.866016			3.2e-06	4.25811	0.101405
														C7	24216	19154	1.26428			3.2e-07	4.27569	0.10209
														C8	23639	18881	1.252			3.2e-08	4.46021	0.0370492
														C9	24056	18204	1.32147
														D7	32689	13189	2.4785
														D8	32191	13483	2.38753
														D9	31823	12849	2.47669
														E7	37787	10054	3.7584
														E8	38119	10257	3.71639
														E9	37624	10127	3.71522
														F7	40521	9426	4.29885
														F8	38900	8978	4.33281
														F9	38821	9371	4.14267
														G7	41349	9441	4.37973
														G8	39364	9427	4.17567
														G9	40440	9467	4.27168
														H7	40964	9240	4.43333
														H8	41608	9361	4.44482
														H9	41864	9298	4.50247
[truncated: 152 more columns]

[truncated: 1 more sheets: Sepiapterin]
