# Supplementary material for: Semisynthetic biosensors for mapping cellular concentrations of nicotinamide adenine dinucleotides
Source: eLife. 2018 May 29;7:e32638. doi: 10.7554/eLife.32638 (PMC5990361; doi:10.7554/eLife.32638)
Supplement: Appendix 1—figure 1—source data 4. [file elife-32638-app1-fig1-data4.xlsx]

## Sheet: App1_Figure_1e
Titration of NADP-Snifit with NADP+ at different temperatures
	25°C		30°C		37°C
[NADP+] (M)	Ratio (TMR/SiR)	SD	Ratio (TMR/SiR)	SD	Ratio (TMR/SiR)	SD
0.0001	0.708704	0.0104717	0.751714	0.018054	0.801571	0.00808379
1e-05	0.758915	0.03623	0.795484	0.0121405	0.896348	0.0110511
1e-06	0.974732	0.0112649	1.03546	0.0298283	1.27763	0.0184171
2e-07	1.45597	0.0354089	1.65089	0.0406913	2.12816	0.121213
4e-08	2.60738	0.0274131	2.98035	0.0901609	3.65755	0.13309
8e-09	3.88461	0.0393528	4.23083	0.142199	4.49522	0.275715
8e-10	4.54857	0.138714	4.66309	0.0464875	4.83909	0.0936947
8e-11	4.77442	0.224334	5.01594	0.100399	5.01928	0.276517

## Sheet: 25 °C
Titration of NADP-Snifit with NADP+ at 25 °C
Wavel.	540	541	542	543	544	545	546	547	548	549	550	551	552	553	554	555	556	557	558	559	560	561	562	563	564	565	566	567	568	569	570	571	572	573	574	575	576	577	578	579	580	581	582	583	584	585	586	587	588
A4	6080	5037	3977	3284	3149	2780	2641	2875	3149	2948	2937	3015	3753	3986	4617	5024	5279	5870	6475	6540	7334	8340	8277	9177	9875	10239	11099	11404	12265	12078	13066	13545	13825	14521	14725	14765	14965	14715	15286	15717	14859	14620	15161	15179	13979	14774	13574	12538	13248
A5	7335	5482	4104	3388	2807	2678	2801	2550	2866	3254	3142	3380	3716	4098	4617	4785	5481	6052	6532	6997	7545	8220	8672	9108	9896	9921	11161	12119	12325	13249	13443	14216	14499	14652	15157	15437	15297	14994	15327	15782	15038	15139	14909	15031	14654	13772	13120	13557	13633
A6	7568	5335	4124	3253	2913	2462	2662	2547	2705	2852	3212	3366	3631	3999	4412	4550	5102	5746	6385	6520	7709	7823	8629	9094	9809	10335	11299	11556	11983	12976	13540	13730	13715	14097	14330	14840	15390	14721	15177	15402	15446	15176	14733	14830	14523	14540	13989	12984	13008
B4	7100	5370	4018	3437	3025	2762	2787	2701	2831	3216	3294	3484	4114	4216	4607	4976	5673	6317	6922	7318	7678	8500	9086	9856	10643	10959	11649	12031	12764	13123	14167	13757	14749	15560	15620	16063	15729	15701	16497	16233	16357	16233	16228	15222	15128	14805	14635	14650	13755
B5	7369	5303	4064	3022	3092	3045	2735	3017	2689	3167	3165	3589	3998	4026	4683	5285	5708	6442	7345	7279	7683	8332	9028	10209	10531	11329	11050	12068	12950	13415	13848	14314	14531	15155	15456	16568	15858	15420	16280	15638	15715	16659	16171	15969	14993	15503	14928	14426	13869
B6	7522	5584	4550	3393	3151	2878	2821	3183	3253	2874	3378	3458	4069	4123	4914	5054	5125	6442	7312	6995	7643	8480	8946	9919	10522	10993	11960	12272	12982	13344	13751	13983	14775	15249	16029	15961	16218	16355	16161	16521	15913	16492	16037	15068	15288	15145	14283	14043	13348
C4	7636	5247	4719	3449	2979	3149	3145	3067	3215	3400	3235	3818	4480	5082	5440	5746	6378	6611	7482	8442	8730	9867	10364	11553	12311	13228	13719	14035	14950	15885	17047	17218	16994	17806	18061	17898	18955	19061	19293	19132	18924	19240	18476	19109	18149	17608	17305	16942	17041
C5	7551	5309	4179	3476	3049	3113	2691	2961	3204	3670	3874	3997	4570	5037	5383	5675	5862	7137	7365	8410	9692	9174	10470	11471	12241	12441	13521	15351	13647	16101	16223	17286	17026	18601	18105	18686	18577	18611	18999	18791	19060	18997	18917	17907	18216	17212	16759	16932	16456
C6	7153	5468	4139	3587	3219	3119	3057	3092	3153	3364	3871	4119	4146	5020	5366	5628	6103	6754	7426	7882	8890	9337	10403	10990	12267	13273	13421	14661	14747	15363	16392	16809	16860	17213	18066	18390	18607	18173	18995	18658	18271	18485	19171	18518	17485	18008	16701	16833	15909
D4	7257	5557	4849	3809	2880	3270	3204	3217	3308	3790	3807	4476	5158	5490	5823	6157	7623	7830	9004	9737	10903	11368	12670	13127	14624	15191	16154	17510	17641	19713	19686	20780	20354	21684	21904	22796	23101	22969	23328	22912	23338	23052	22746	22782	22315	22330	21686	20328	19425
D5	7409	5856	4340	3697	3439	3288	3289	3397	3352	3789	4554	4578	5295	5938	6527	6926	7030	8218	9021	9121	10584	12055	13132	13951	14704	15135	16924	17957	17617	19640	20960	20959	21287	22146	22867	23096	23214	23016	24144	23419	23557	22870	23769	22789	22556	22128	21484	20718	20460
D6	7541	6028	4579	3688	3833	3241	3212	3213	3504	4100	3980	4685	5111	5483	6512	6862	8064	8599	8667	10008	10883	11541	12654	13913	14758	16288	16983	17479	19044	20140	20252	21106	21439	21954	22662	23635	23763	23700	23289	23595	23518	23921	23470	23073	22070	21450	21757	20815	20607
E4	7922	5932	4619	4025	3742	3537	4031	3945	4268	4461	4973	5443	6149	6611	7612	8495	9476	10069	11216	12090	13880	14372	15042	16227	18876	18933	21578	21864	22962	23689	25350	26243	26932	28470	29092	29646	30137	30178	30210	30361	30483	30506	30447	29239	28154	28852	27622	28337	26516
E5	7797	5695	4687	4111	3623	3740	3752	3789	4159	4407	5033	5475	6590	6873	7659	8503	9434	10641	11323	12836	13367	14461	15680	17550	19319	20501	21634	22579	24930	25218	25907	26831	27769	29344	29459	30804	31372	31017	30526	30212	31504	31562	30307	29551	29471	30199	28207	27318	27578
E6	8085	6198	4776	4143	3949	3909	3768	4128	4433	4406	5011	5544	6372	7330	7887	8622	9654	11039	11813	12867	14524	15211	16790	18157	19617	20334	21689	23342	24507	25702	25444	27106	28884	29337	29087	30241	30528	31175	31296	31492	31476	31572	31796	30523	30049	28789	28864	27954	27404
F4	8201	5919	4724	4291	3983	3961	4118	4179	4811	5334	5249	6105	7023	7996	8500	9537	10806	11427	13039	14391	15268	17043	18842	20016	21241	23077	24164	26365	27482	28333	30421	30447	31955	33296	33472	33606	34674	35265	34944	35326	35498	36273	34108	34786	34739	32443	32568	30931	31348
F5	7825	5955	4957	4077	4134	4191	4249	4427	4679	5206	5957	6699	7436	7645	8434	9718	10202	12510	13262	14354	15998	16951	18636	20034	22612	24322	25297	26847	27142	28768	30936	32314	32166	33754	33922	34054	35779	36271	35592	35721	36738	35391	36500	36188	35710	34854	32880	31804	30917
F6	8332	5620	4762	4527	3973	4142	4240	4416	4868	5008	5433	6259	7112	7763	8643	9561	10851	12007	12817	14109	15704	16816	18637	20342	22015	23514	24152	26393	28011	28611	29998	31483	31837	32648	33543	34719	35566	35248	35950	35285	35701	35892	35706	35037	34589	32902	32749	32070	31245
G4	8148	6163	5030	4221	3943	4122	4108	4536	4936	5595	5483	6362	7360	8587	9172	9702	11166	12946	13666	14694	16490	18000	19281	21790	23261	24883	26105	27542	29917	30625	32470	32869	34743	35634	35401	36298	37291	37935	37348	38161	37290	38312	37311	36289	36678	35695	34471	33403	32943
G5	7351	5935	5092	4441	4399	4187	4381	4819	4800	5558	5814	6565	6969	8284	9443	10004	11359	12735	14224	15346	17219	18473	19346	21447	23329	25410	26735	28741	29627	30921	32129	33810	34410	36207	36388	37919	37960	39028	37789	39825	38455	38072	37804	37266	37234	36726	35194	34436	32994
G6	7661	6255	4765	4319	4364	4117	4231	4309	5057	5558	6445	6782	7277	7846	9013	10406	11706	12759	13585	14950	17572	17776	19647	22091	23446	24632	26483	28148	28992	31320	33158	33020	34646	35747	36713	37364	38506	38446	38345	38766	38919	39364	38535	37182	37373	36926	34994	35245	33418
H4	7433	6025	5023	4116	4257	4369	4208	4371	4966	5518	6132	6229	7762	8095	9577	10065	11601	12756	13909	14946	16843	18361	19853	21841	23360	24081	27173	27282	28977	30918	31804	33327	33965	34941	36028	36894	38283	38057	38289	38330	38378	37208	37388	37309	36757	36023	34826	34910	33336
H5	7949	6071	4924	4087	3943	4248	4143	4657	4967	5834	5910	6815	8019	8068	9443	10177	11477	12763	13622	15672	17219	18433	20074	21924	23876	24792	27541	27676	29741	31978	32656	33355	34271	35787	36418	37730	37553	38056	39031	38553	38197	39178	38115	38119	37600	36395	35328	34237	33517
H6	7968	5832	5041	4031	3986	4029	4313	4475	4944	5438	6310	6957	7946	8472	9448	10263	11706	13177	14250	15534	17475	18062	19655	22203	22918	25365	26458	28414	30075	31357	32506	34484	35097	37140	36944	37893	38968	38932	39182	38882	38250	38622	38776	38048	37075	36889	35865	34204	33569
															TMR int.	SiR int.	Ratio (TMR/SIR)			[NADP+] (M)	Mean Ratio (TMR/SIR)	SD
														A4	14715	20806	0.707248			0.0001	0.708704	0.0104717
														A5	14994	20830	0.719827			1e-05	0.758915	0.03623
														A6	14721	21059	0.699036			1e-06	0.974732	0.0112649
														B4	15701	21464	0.731504			2e-07	1.45597	0.0354089
														B5	15420	20691	0.745252			4e-08	2.60738	0.0274131
														B6	16355	20444	0.79999			8e-09	3.88461	0.0393528
														C4	19061	19807	0.962337			8e-10	4.54857	0.138714
														C5	18611	18907	0.984344			8e-11	4.77442	0.224334
														C6	18173	18591	0.977516
														D4	22969	15537	1.47834
														D5	23016	16264	1.41515
														D6	23700	16074	1.47443
														E4	30178	11697	2.57998
														E5	31017	11896	2.60735
														E6	31175	11832	2.6348
														F4	35265	9161	3.84947
														F5	36271	9236	3.92713
														F6	35248	9091	3.87724
														G4	37935	8363	4.53605
														G5	39028	8316	4.69312
														G6	38446	8705	4.41654
														H4	38057	8210	4.63544
														H5	38056	8176	4.6546
														H6	38932	7735	5.03323
[truncated: 152 more columns]

## Sheet: 30 °C
Titration of NADP-Snifit with NADP+ at 30 °C
Wavel.	540	541	542	543	544	545	546	547	548	549	550	551	552	553	554	555	556	557	558	559	560	561	562	563	564	565	566	567	568	569	570	571	572	573	574	575	576	577	578	579	580	581	582	583	584	585	586	587	588
A4	6058	5010	3844	3374	2737	2502	2564	2666	2662	2661	3222	3360	3617	3888	4155	4971	5058	5525	6589	7125	7616	7982	8567	9174	9528	10216	10505	11412	11913	12119	13088	13141	13386	13909	14252	14387	14466	14420	15180	14701	15201	14858	14424	14454	14414	13749	13511	13089	12355
A5	7148	5249	3844	3299	2761	2764	2520	2817	2716	2990	3041	3478	3765	3865	4160	5133	5373	5725	6311	7265	7497	7837	8264	9022	9491	10443	11032	11418	12388	12358	13372	13003	14039	13631	14626	14300	15462	14981	15348	15185	14507	14455	15313	14770	14391	14194	13468	14025	13018
A6	6894	4887	3894	3530	3033	2693	2714	2518	2577	2901	2922	3531	3723	4199	4151	5086	5115	5918	6214	6533	7320	7777	8553	8848	9702	10287	10176	10765	11953	12207	12875	13340	13677	13442	13948	14268	14933	14980	14838	14689	14794	14563	14811	14650	14138	13508	13903	13448	12687
B4	7028	5166	4291	3565	3014	2969	2922	2913	2623	3059	3273	3578	3970	4403	4377	5244	5781	6124	6794	7754	7862	8661	9437	9564	10349	11215	11357	12247	12888	13238	14002	14992	14392	15398	15349	15551	15513	15856	16084	15551	15782	15369	15669	15015	15615	15484	14645	14063	13570
B5	7161	5116	4099	3395	3186	2916	2785	2924	2933	3164	3493	3405	4153	4259	4784	4997	5730	6554	7020	6735	8131	8743	9601	9332	10103	11018	11795	11795	12602	13971	14361	14455	14878	15350	15739	15668	16082	15846	16385	16065	16442	16675	15827	15437	15500	15120	14612	14251	14129
B6	6875	5144	4216	3376	3243	2815	3036	2715	3182	3157	3361	3495	3884	4231	4355	5238	5967	5728	6559	7045	8232	8426	8808	9609	10196	10754	12001	12397	13155	13449	14110	14459	14319	15346	15480	15293	15494	15813	15959	15688	16281	15911	15396	15906	15581	15012	14424	13789	13948
C4	8025	5410	4215	3460	3229	3255	3166	2905	3391	3402	4321	3880	4378	4882	5194	5628	6502	7477	8374	8802	9222	9409	10761	11579	12863	13459	13450	14492	14875	15540	16247	17226	18494	17825	18274	18778	18676	18818	18800	20111	18720	18752	19120	18645	18173	18002	18057	16841	16985
C5	7260	5322	4166	3451	3118	3311	2982	3230	3197	3795	3679	3804	4243	4572	5151	6018	6491	6910	7972	8023	9091	9801	10658	11529	12489	13208	12948	14054	14838	15847	16239	16352	17598	17510	18563	18240	18422	18568	18594	19232	18637	19144	18529	17714	18976	17890	17659	16745	16414
C6	7961	5416	4289	3514	3034	3254	2994	2967	3182	3249	3594	3603	4295	4877	5397	5698	6520	6766	7390	8138	8625	9923	10918	10838	12203	12944	13397	14506	15083	16367	16832	16944	16920	17843	18260	18433	18754	18596	19428	18977	18893	18515	18657	18990	17374	16871	16799	16353	16251
D4	7222	5776	4034	3724	3328	2994	3543	3291	3670	4047	4441	4767	5328	6031	6233	7202	7939	8464	9335	9924	10635	12108	13053	13782	14768	15915	17141	17958	18929	19997	20090	20901	21821	22220	24044	23578	23798	23674	24066	23603	23678	24224	23457	23800	23326	22142	22226	21737	20659
D5	7406	5743	4538	3907	3482	3096	3575	3538	3987	3906	4358	4772	5327	5970	6501	6933	8069	9036	9434	10139	11687	12774	12706	14018	15198	15846	16977	17842	19551	20462	21639	20698	22481	23204	22710	24009	24228	24200	24177	23995	25611	23819	23784	23932	23514	23300	22982	22375	21885
D6	7250	5488	4323	3788	3377	3597	3284	3610	3736	4003	4300	4891	5571	6022	6350	6982	8056	8811	9951	10307	11186	12757	13442	14842	15025	16545	17379	18632	18800	20024	21093	21108	23292	22546	23520	24079	23599	25184	25407	24615	24052	23870	23806	24013	23019	23068	22652	22352	21511
E4	7321	5948	4374	4110	3432	3958	3666	4417	4133	5055	5123	5775	6199	6888	7886	9095	9805	10289	11955	12891	14505	15365	17184	17791	19317	20644	22640	22900	24142	24995	27076	27412	28587	28437	29651	30049	31119	31191	31052	31289	31976	31738	31117	29640	31172	29453	29301	28722	27587
E5	8363	5784	4793	4049	3747	3886	3949	4133	4403	4647	5712	6057	6427	7567	7828	9299	10282	11067	11929	13605	14647	15912	17336	18201	19408	20485	22133	23836	24894	26547	27894	28885	28675	29853	30435	30596	30865	31398	32219	32161	32330	31986	31905	31214	30454	29978	29290	28517	27971
E6	7351	5839	4436	3944	4022	3884	3735	4410	4401	4851	5291	6035	6659	7232	8332	9463	10147	11142	12375	13302	14490	16091	17029	18617	19798	21205	22754	24826	26016	26199	26959	27290	29419	30239	31159	30488	32214	31667	33107	31766	32129	32128	31507	30904	30172	29867	29074	29161	28099
F4	7093	5714	4753	4253	4020	4128	4245	4495	4942	5378	6446	6381	7462	8419	8999	9568	11470	12200	13450	14361	16015	17544	19270	20162	21854	23498	24613	26644	28319	28881	30486	31110	32301	33135	34055	35356	35692	35658	35301	35762	35306	36200	35608	35382	34584	33988	32514	32110	31565
F5	7662	5698	4687	4458	4057	4011	4160	4674	4874	5303	5890	6450	7426	8296	9137	10222	11121	12229	13612	14324	16554	17702	19452	20175	22471	22463	24806	26350	28010	29421	30182	31795	33089	33764	34794	35128	35127	35365	36881	35303	36843	35763	35659	35471	34847	33778	32506	32955	30865
F6	7925	6064	5047	4241	3987	4136	4201	4493	5083	5367	5758	6758	7289	8108	8492	9748	10982	12309	13836	14773	16033	17258	18439	20354	23007	22899	24733	25793	28366	29014	29663	30199	32053	33023	33140	34339	34294	35332	36030	35184	35623	34301	35118	35047	33895	33730	32223	32159	30432
G4	7345	6206	4944	4536	4040	4400	4420	4458	5107	5468	6356	6533	7418	8525	9306	10116	11770	12513	14271	15280	16218	18702	19405	21567	23224	24973	26270	28013	29479	30344	31499	32919	34284	34811	35175	36934	36381	36799	37742	37383	38448	37113	37381	36758	36586	35397	34707	34078	33009
G5	7448	6559	5388	4534	4245	4365	4208	4453	5196	5287	6104	6695	8132	8558	9340	10503	11375	13497	14263	15058	16943	19132	20188	21694	23398	24743	26400	28429	29584	30241	32361	33356	33865	35613	36452	36225	37602	37854	37927	38648	37745	37372	37300	37679	35551	36107	34976	34604	32828
G6	7451	6176	4836	4399	3917	4306	4461	4242	5077	5875	6369	6631	7496	8692	9448	10309	11971	12552	14078	15294	17514	18203	20119	21333	23298	24600	26177	27217	29522	31566	32226	32162	34058	35835	35854	37260	38115	36991	37710	38269	37366	37842	37344	36100	36892	35666	35153	33368	32558
H4	8378	5647	5005	4693	4069	4074	4485	5050	4974	5351	6049	6731	7710	8568	9478	10678	11544	13050	14063	14683	17061	18640	19430	21647	22872	23787	25713	27625	29707	31076	32470	33700	34353	34655	36003	36055	36717	38150	37554	37727	37074	37082	37218	36879	36576	36150	34633	32807	32490
H5	7458	5861	4858	4325	4184	4247	4203	4273	4947	5874	6505	6624	7176	8766	9738	10629	11553	13216	14704	15170	16958	18681	20088	21508	23441	24439	26631	28066	29696	30953	31752	33014	34374	35836	37282	36406	37280	38386	37450	37986	38831	37987	36884	36497	35695	35947	34075	34606	33900
H6	7712	5702	4942	4549	4185	4418	4233	4653	4933	5421	6595	6847	7342	8858	9414	10458	12271	13001	14016	15019	17603	18893	19506	21696	23304	25155	26947	27852	28981	30382	32133	33383	34931	35881	36132	36744	37245	37777	37939	38854	38100	37426	37193	37359	36148	36163	34697	33720	33464
															TMR int.	SiR int.	Ratio (TMR/SIR)			[NADP+] (M)	Mean Ratio (TMR/SIR)	SD
														A4	14420	19723	0.731126			0.0001	0.751714	0.018054
														A5	14981	19587	0.764844			1e-05	0.795484	0.0121405
														A6	14980	19732	0.759173			1e-06	1.03546	0.0298283
														B4	15856	20204	0.784795			2e-07	1.65089	0.0406913
														B5	15846	19983	0.792974			4e-08	2.98035	0.0901609
														B6	15813	19554	0.808684			8e-09	4.23083	0.142199
														C4	18818	17589	1.06987			8e-10	4.66309	0.0464875
														C5	18568	18214	1.01944			8e-11	5.01594	0.100399
														C6	18596	18284	1.01706
														D4	23674	14695	1.61102
														D5	24200	14673	1.64929
														D6	25184	14881	1.69236
														E4	31191	10596	2.94366
														E5	31398	10184	3.08307
														E6	31667	10866	2.91432
														F4	35658	8385	4.25259
														F5	35365	8670	4.07901
														F6	35332	8102	4.3609
														G4	36799	7853	4.68598
														G5	37854	8212	4.6096
														G6	36991	7881	4.69369
														H4	38150	7690	4.96099
														H5	38386	7480	5.13182
														H6	37777	7624	4.95501
[truncated: 152 more columns]

## Sheet: 37 °C
Titration of NADP-Snifit with NADP+ at 37 °C
Wavel.	540	541	542	543	544	545	546	547	548	549	550	551	552	553	554	555	556	557	558	559	560	561	562	563	564	565	566	567	568	569	570	571	572	573	574	575	576	577	578	579	580	581	582	583	584	585	586	587	588
A4	5942	5086	4218	3435	2896	2850	2622	2620	2718	2803	2925	3285	3710	3741	4202	4480	5121	5601	5711	6535	6852	7967	7800	8867	9572	10052	10581	10491	11203	11949	11935	12968	13027	13838	14011	13871	14137	14373	14494	14763	14144	14542	13929	14123	13784	13142	12762	13610	12312
A5	6995	4977	3867	3196	2833	2807	2390	2625	2681	2699	3027	3006	3750	4110	4252	4645	4823	5835	5879	6638	7354	8054	7848	8667	9934	9855	10512	11228	11501	12257	12633	13034	13297	13532	13983	14768	13801	14337	14569	14909	14643	13817	14156	13779	13851	13192	13066	13385	12631
A6	6241	5043	4237	3094	2857	2628	2749	2669	2645	3152	3012	3212	3398	3893	4727	4596	4719	5658	5891	6708	7091	7520	8316	8459	9361	9811	10322	10867	11164	12230	12035	12656	12945	13188	12902	13889	14558	13859	14061	13740	14200	14829	13961	13727	13227	13137	12834	12807	12353
B4	7055	5074	3953	3426	2945	3020	2851	2639	3032	2843	3346	3479	4032	4620	4860	5363	5726	6578	7164	7325	8352	8778	9292	9311	10922	11285	11644	12988	13359	13215	14230	14505	15375	15203	16153	15897	15659	16383	15617	16708	16034	16435	15729	15677	15107	14900	15102	14473	13994
B5	6790	5124	3795	3424	3321	3152	2893	2636	2792	3055	3342	3653	3928	4492	4702	5039	5688	6223	6679	7250	7994	8611	9932	9823	10803	11499	11492	12351	12833	13138	13779	14496	14665	15216	15299	15536	15411	15979	15870	16253	15940	15566	15703	15176	15756	14674	14720	13992	13641
B6	6377	4932	3994	3315	2967	2945	2758	3139	2736	3145	3628	3912	3553	3958	4944	5176	5909	5808	6804	7418	8056	9011	8906	9688	10706	11027	11488	12141	13083	13049	14647	14243	14255	15120	15203	16169	16326	16328	16231	16213	15925	15626	15196	15377	15144	15077	14564	14185	13844
C4	6772	5475	4198	3674	3790	3093	3340	3003	3584	3743	3788	4701	4869	5117	6140	6361	6784	7799	8277	9118	10216	10827	11532	12266	13137	14273	15011	15739	16415	16692	17747	18462	18769	18991	20240	20252	19874	20585	20414	20838	20336	20997	20217	20484	19851	19129	18651	18435	18396
C5	6827	5407	4573	3513	3168	3218	3108	3211	3399	3592	4225	4228	4484	5217	5621	6389	7240	7701	7783	8805	9774	10898	11864	11576	13554	13665	15195	15274	16081	16641	17976	17516	18472	20101	19128	20619	19457	20393	20272	20438	20664	20201	19922	19586	19225	18957	18899	18217	17674
C6	6729	5582	4193	3491	3000	3373	3045	3272	3486	3813	3882	4581	4846	5140	5895	6266	7264	8041	7989	8784	9880	10305	11577	12062	12774	14173	14885	15790	15893	16525	17174	18462	18694	19064	19487	19723	20541	20145	20783	20678	20520	19795	19559	19950	19647	18630	18368	18251	17451
D4	6759	5713	4187	3754	3431	3590	3730	3957	3853	4619	4768	5114	5714	6301	7243	8407	8664	9333	10280	11453	12548	13169	15514	14962	16967	17391	19162	20321	20609	21512	21826	23064	24812	25021	25968	25277	26181	25831	26419	26938	26545	26192	26551	25092	24965	24167	25302	23449	22922
D5	7159	5885	4618	3984	3387	3467	3278	3942	4465	4387	4849	4928	5640	6873	7299	7851	9461	9496	10869	11093	12732	14015	15054	16319	17265	17756	18621	20608	21610	21358	23177	23711	24606	25707	25589	26157	26029	26900	27018	26931	26911	26710	26301	26482	25545	25293	24941	24361	23369
D6	7359	5550	4296	4009	3597	3696	3706	3944	4095	4353	4488	5508	5932	6411	6479	7799	9149	9799	10817	11644	13046	13310	14908	15406	16917	18070	18911	20147	20835	22002	23159	23878	25347	25136	25621	26584	26678	26204	27084	26617	26425	26609	26575	25077	25652	24855	25029	24044	23294
E4	7850	5472	4414	3978	3978	3798	3797	4252	4683	5229	5452	6043	6600	7938	8084	9378	9948	11037	12378	13673	15434	16003	17967	18902	20509	21775	23964	23641	25282	26445	26465	28876	29265	30181	30777	31663	33208	31874	33227	33183	31492	31875	32040	31592	30698	30464	29696	28618	28010
E5	7511	6036	4600	4278	3804	3934	4131	4546	4769	5149	5951	6346	7124	7705	8799	9985	10924	11276	13044	14083	15365	16097	18143	18752	20517	22005	23270	24509	25929	27356	27933	29676	30828	31569	31925	31854	32162	32567	33329	33767	33012	31956	32792	31352	31362	30851	29910	29201	28148
E6	7501	5506	4835	4207	4034	3833	4046	4295	4830	5451	5882	6299	6774	7746	8724	9515	10375	11114	12906	13937	14945	16885	18285	19200	20685	22436	22814	24984	25133	26966	27819	29106	29723	31092	31932	31195	32528	31991	32831	32041	32677	32850	32711	31785	31366	30795	30077	29746	28171
F4	6928	5718	4609	3924	4139	4218	4152	4738	4998	5590	6314	6535	7525	8322	8936	9640	11253	12262	13129	14019	16340	17606	19059	20045	20967	23092	23972	26036	26679	28566	29394	31263	31519	32741	33539	33603	35155	34974	34773	35295	34428	34773	34824	33558	33425	33082	31948	31116	29699
F5	7098	5923	4776	4500	4306	4257	4381	4517	5030	5409	6243	6514	7620	8069	9776	10219	11685	12119	13297	15243	16572	17859	19325	20174	21843	22913	25572	26220	27114	28439	29707	31036	31809	32627	33921	34032	34132	35159	35454	36346	35016	34591	33590	34254	32813	31717	31376	31932	30892
F6	7375	6093	4568	4406	3841	4025	4319	4485	5240	5084	5797	6827	7258	8454	8445	10017	10965	11655	13422	15232	16388	17432	18599	20339	21410	22716	24714	25383	26684	28525	28968	30297	31273	32013	33103	33225	33864	33414	34630	34627	34338	33496	34020	34115	32523	32181	31260	30935	30219
G4	7629	5695	4901	4397	4052	4026	4502	4333	4883	5912	6015	6860	7661	8168	9118	10076	11144	12401	14111	14936	16868	17646	18813	20971	21638	22851	24733	26511	28566	29597	30275	31124	32044	33384	33295	34252	35382	34966	35373	35330	35697	36393	34678	34554	33813	33372	32704	31363	31046
G5	7484	6032	4904	4202	4271	4272	4215	4532	5070	5950	6038	7043	7770	8663	9333	10789	11446	12993	13663	14860	16772	17965	20155	20320	22502	25482	25518	26064	27895	29378	31077	31748	32386	33584	34646	35535	35310	34833	36235	35335	37260	35977	35910	35836	34331	33291	32972	32530	32598
G6	7488	5813	4855	4561	4051	4328	4153	4913	5337	5499	5983	6784	7543	7884	9248	10048	11225	12440	13402	15469	16307	18460	19839	21137	22456	24187	25830	26601	28099	29036	29674	31513	32774	33005	33990	34393	36057	35432	35548	35450	35869	35455	35681	34988	34531	33131	33922	31168	31216
H4	7408	6333	4946	4279	4151	4007	4338	4525	4890	5585	5836	7227	7278	7761	9048	9700	11198	12003	13748	13975	16165	17561	18542	20502	22332	23242	24652	26359	28464	29158	29940	31066	31042	32420	33870	34148	34393	35094	34689	35935	34376	35051	34348	34132	33667	32767	33010	31062	30845
H5	6998	6139	5168	4372	4325	4299	4281	4737	5142	5765	5797	6839	7682	8223	9499	9996	11297	12468	13678	15231	17216	17407	19305	20394	22554	23933	25521	26391	28433	29145	30129	30998	32391	33686	34016	34812	34675	35388	35399	35807	35554	35882	35033	34858	34593	32761	32917	31670	31153
H6	7658	5790	4741	4519	3940	4363	4219	4619	4908	5439	6060	6883	7224	8147	9051	10425	11394	12181	13513	15153	16191	17847	19815	21157	21493	23400	25306	26363	27366	28475	30093	30403	32896	32153	34081	33777	34358	35408	35371	35654	34965	35595	35118	34447	33915	33313	32258	31097	30323
															TMR int.	SiR int.	Ratio (TMR/SIR)			[NADP+] (M)	Mean Ratio (TMR/SIR)	SD
														A4	14373	17733	0.810523			0.0001	0.801571	0.00808379
														A5	14337	17935	0.799387			1e-05	0.896348	0.0110511
														A6	13859	17437	0.794804			1e-06	1.27763	0.0184171
														B4	16383	18158	0.902247			2e-07	2.12816	0.121213
														B5	15979	18084	0.883599			4e-08	3.65755	0.13309
														B6	16328	18078	0.903197			8e-09	4.49522	0.275715
														C4	20585	16374	1.25718			8e-10	4.83909	0.0936947
														C5	20393	15773	1.29291			8e-11	5.01928	0.276517
														C6	20145	15704	1.28279
														D4	25831	12992	1.98822
														D5	26900	12250	2.19592
														D6	26204	11909	2.20035
														E4	31874	8373	3.80676
														E5	32567	9171	3.55108
														E6	31991	8850	3.6148
														F4	34974	7268	4.81205
														F5	35159	8158	4.30976
														F6	33414	7657	4.36385
														G4	34966	7312	4.782
														G5	34833	7275	4.78804
														G6	35432	7162	4.94722
														H4	35094	6715	5.22621
														H5	35388	7521	4.70523
														H6	35408	6907	5.12639
[truncated: 152 more columns]
