# Supplementary material for: Semisynthetic biosensors for mapping cellular concentrations of nicotinamide adenine dinucleotides
Source: eLife. 2018 May 29;7:e32638. doi: 10.7554/eLife.32638 (PMC5990361; doi:10.7554/eLife.32638)
Supplement: Appendix 1—figure 1—source data 5. [file elife-32638-app1-fig1-data5.xlsx]

## Sheet: App1_Figure_1f
Titration of NAD-Snifit with NAD+ at different temperatures
	25 °C		30 °C		37 °C
[NAD+ (M)	Ratio (TMR/SiR)	SD	Ratio (TMR/SiR)	SD	Ratio (TMR/SiR)	SD
0.02	0.609735	0.0196046	0.643789	0.0067348	0.718488	0.0155258
0.002	0.730594	0.00886425	0.788073	0.0325715	1.0059	0.0196675
0.0004	1.12864	0.0170179	1.21646	0.0801565	1.73927	0.0554541
8e-05	2.21001	0.0744293	2.3522	0.0727719	3.09098	0.0965572
1.6e-05	3.41574	0.0643257	3.69796	0.0516129	4.15583	0.139691
3.2e-06	4.25098	0.152737	4.50035	0.31043	4.47153	0.0728637
3.2e-07	4.38973	0.191222	4.6356	0.175247	4.63043	0.148381
3.2e-08	4.65332	0.13816	4.59246	0.044333	4.62345	0.141033

## Sheet: 25 °C
Titrations of NAD-Snifit with NAD+ at 25 °C
Wavel. (nm)	540	541	542	543	544	545	546	547	548	549	550	551	552	553	554	555	556	557	558	559	560	561	562	563	564	565	566	567	568	569	570	571	572	573	574	575	576	577	578	579	580	581	582	583	584	585	586	587	588
A10	6056	4692	3493	3169	2459	2356	2315	2222	2479	2161	2549	2722	2804	3260	3574	3889	4385	4829	4923	5540	6335	6786	7657	8155	8738	9092	9308	10190	10526	10922	11256	12021	12471	12564	12911	12846	13993	13251	14438	13400	14442	13612	13881	13791	13370	12755	12642	12346	11970
A11	6420	4815	3466	2815	2598	2450	2054	2193	2123	2412	2443	2587	2950	3227	3579	3975	4369	4676	5191	5802	6108	7166	7179	7870	8607	9125	10137	10074	10642	11437	11164	12456	12439	12718	13261	14285	13827	14224	13397	13632	13820	13943	13262	13983	13448	13075	12847	12260	11830
A12	6391	4688	3468	2992	2481	2436	2127	1980	2346	2340	2388	2683	3011	3256	3333	3945	4060	4526	4948	5548	6074	6441	7060	7635	8142	8884	9617	10320	10447	10967	10617	11356	11897	12630	12236	12791	13321	12654	13666	13443	13703	13306	13319	12569	12886	12190	12851	11797	11390
B10	6165	4609	3268	2818	2558	2472	2221	2345	2254	2712	2897	2858	3241	3436	3860	4479	4968	5041	5894	6672	7037	8175	8843	9061	10151	10319	11048	11923	12432	13070	13295	13940	14275	15154	15028	16284	16071	15804	16110	15956	16294	15533	15883	15548	15925	14656	14795	14483	14008
B11	6189	4763	3190	2717	2589	2357	2252	2398	2097	2394	2719	3030	3195	3697	3580	4274	4597	5161	5791	6248	7220	7606	7834	8889	9757	10011	11285	12474	12103	12899	13250	13668	14155	14937	15286	15984	15418	15904	16508	15960	15545	15550	16098	15037	15114	14966	14119	14140	13802
B12	6557	4322	3712	2710	2605	2118	2263	2211	2367	2342	2584	2833	3172	3475	4057	3986	4888	5254	5990	6719	7081	7790	8745	8754	9701	11097	10954	11908	12642	12833	12855	13805	14434	14232	15029	15404	16044	15094	15860	16354	15952	16764	16375	15019	15036	15196	14786	13916	13322
C10	6198	4827	3363	3324	2997	2488	2696	2508	2644	2979	3144	3457	3725	4504	4788	5747	5942	6844	7602	8121	9174	9983	10557	12002	12574	13632	14264	15492	15375	16460	16895	18190	19158	19998	19317	20367	21936	21034	21167	20624	21322	21046	20805	20683	19824	19786	19481	18516	18197
C11	6433	4829	3886	3096	2883	2565	2230	2435	2599	2971	3172	3099	3799	4336	4918	5502	6054	6589	7373	8297	8975	9691	10738	11598	12474	13378	14579	14956	16044	17023	17721	18661	19268	19047	19488	20080	21066	20583	21167	21044	20891	21487	20551	20168	19968	20249	19085	18490	19191
C12	5908	4450	3417	3120	2622	2588	2566	2571	2536	3051	3251	3287	3825	4536	5276	5590	6164	6606	7418	8285	9203	10054	10789	12044	12720	13611	14292	15525	16245	16751	18636	18304	19262	19667	19962	20846	21245	21068	21017	21479	21544	21281	21327	20813	21040	20657	20405	18878	18859
D10	6544	4857	3899	3396	3024	2827	2917	3223	3221	3432	4036	4353	4971	5836	6403	7241	8193	8887	9637	11373	12382	13757	14388	16160	16551	18767	18917	20833	22072	23795	24430	25094	26070	26763	27274	28368	29079	29066	28528	29203	28890	28430	28894	29166	28102	26943	26266	26110	25656
D11	6765	4653	3818	3258	3067	2882	2920	3098	3129	3565	3784	4496	5054	5726	6354	7454	8075	9000	10146	11363	12407	13191	14340	16201	17681	18430	19806	21612	21836	24550	24153	25539	26650	27255	28122	29037	29399	29752	29445	29808	29543	29643	29644	29328	28421	28155	27166	27007	25877
D12	6430	5312	4024	3357	2966	2874	2928	3142	3268	3715	4198	4379	5227	5826	6868	7368	8490	9014	10613	11367	13275	13361	14443	16256	17451	18561	20552	21438	23148	23283	24694	25889	26799	27710	27950	29417	29373	29490	30179	29854	29743	29198	29088	29122	28261	28378	28493	26339	25950
E10	6412	4668	4084	3692	3074	2943	3096	3538	3725	4270	4950	5551	5918	6989	7503	8571	9816	11127	12211	13713	14866	16217	18389	19487	21712	23033	24030	26147	26775	29029	31217	30945	32890	33670	34355	36031	35222	35906	37399	36614	35685	35448	35618	34886	34984	34280	34074	32419	31517
E11	6654	5196	3714	3380	3247	3280	3295	3433	3697	4150	4865	5526	6046	6817	7921	8627	9550	10622	11924	12987	14869	16831	17662	19053	21333	22787	24237	26277	28072	28643	29787	31118	32154	33126	33644	35004	35907	35144	36174	36910	35542	36253	35779	34922	34106	34544	34626	32621	31309
E12	6643	5264	4210	3755	3352	3269	3388	3599	3849	4256	4889	5504	6014	7021	7965	8932	9941	11166	12677	13702	14687	16264	17974	19952	21037	23365	24589	26239	27322	28416	30458	30993	32346	33593	34546	35046	36118	35830	36469	36703	37507	36834	36367	35532	35805	33521	34509	33164	32156
F10	6391	5123	4303	3691	3414	3351	3619	3686	4046	4315	5064	5403	6126	7403	7711	9438	10639	11309	12931	13706	15558	17482	18994	20520	21765	25330	26447	27934	28662	30062	31786	32842	34796	35398	36399	37484	38218	38677	39170	38159	37941	38377	37844	37381	36757	36186	35286	34878	34168
F11	6598	5195	3898	3403	3329	3170	3335	3884	4163	4232	5120	5373	6459	7382	8536	9271	10236	11477	13089	14420	15361	17333	18559	20825	22193	24177	25921	27745	28691	30468	32428	33373	34369	35662	36696	37000	37936	37345	38175	39045	38200	38200	37828	37658	36690	36759	35837	34271	33575
F12	7056	5072	4215	3618	3558	3488	3467	3761	3847	4684	5370	5582	6319	7382	7798	9226	10283	11225	13009	14302	15541	17496	18935	21047	22105	24220	25847	27990	29223	29945	32103	33273	34307	35731	36379	37306	38008	37486	38409	38637	39299	38439	38113	37765	37338	36154	35927	34428	33131
G10	6742	5177	4055	3616	3615	3585	3371	3771	4168	4638	5213	5592	6425	7036	8567	9222	10432	11673	13095	14922	16388	17641	19269	21325	22980	24152	25110	28245	30035	31095	31999	34328	35674	35672	36911	38288	38440	38836	39342	39662	39595	38729	39149	38404	38155	37984	36008	34975	35091
G11	6380	5257	4264	3356	3377	3388	3613	4014	3927	4478	5204	5589	7130	7499	8557	9138	10613	11313	13528	14109	16500	17814	19907	21194	23470	24360	26095	27972	29277	31417	32016	33999	34706	36151	36412	38578	38493	38357	39294	39438	39114	39992	38906	38357	38704	38433	37024	35285	34249
G12	6805	5303	4185	3481	3553	3585	3583	3672	4089	4660	4970	5609	6599	7207	8221	9279	10199	11635	13532	14424	15929	17273	18209	20564	23184	24336	25984	27981	28928	30896	32929	34481	35004	35257	35975	36960	38156	39349	38709	38411	38568	38874	38936	38368	38226	36694	35575	35156	34011
H10	6396	5120	4036	3529	3458	3609	3502	3489	4048	4503	5371	5658	6431	7658	8392	9560	10489	12273	13214	14488	16066	17797	19803	21895	23089	24597	26041	28109	28994	30773	33344	34284	35265	35751	36882	38564	38186	39634	39403	38530	38985	39333	39879	39248	38071	38300	36400	35615	34353
H11	6848	4988	4180	3578	3446	3580	3616	3471	3992	4444	5430	5936	6560	7659	8477	9523	10809	12528	14013	14544	15695	18556	19234	20488	23716	24784	26509	28009	30332	30621	33100	34916	35263	36543	37293	38729	39432	39925	39406	40290	39720	39217	38414	39770	38162	37171	35971	35125	34920
H12	6770	5118	4174	3817	3734	3252	3274	3735	3939	4400	5362	5975	6748	7515	8462	9322	10783	11690	13441	14815	15702	18080	18902	20556	22158	23921	26026	27778	28993	30131	32657	34207	34890	36368	36536	37820	38910	38917	38686	39154	39792	39059	38207	37640	37712	37254	35926	35021	33981
															TMR int.	SiR int.	Ratio (TMR/SIR)			[NAD+] (M)	Mean Ratio (TMR/SIR)	SD
														A10	13251	22053	0.600871			0.02	0.609735	0.0196046
														A11	14224	22499	0.632206			0.002	0.730594	0.00886425
														A12	12654	21227	0.596128			0.0004	1.12864	0.0170179
														B10	15804	21467	0.7362			8e-05	2.21001	0.0744293
														B11	15904	21632	0.735207			1.6e-05	3.41574	0.0643257
														B12	15094	20953	0.720374			3.2e-06	4.25098	0.152737
														C10	21034	18886	1.11374			3.2e-07	4.38973	0.191222
														C11	20583	18296	1.125			3.2e-08	4.65332	0.13816
														C12	21068	18365	1.14718
														D10	29066	13596	2.13783
														D11	29752	13012	2.2865
														D12	29490	13370	2.20568
														E10	35906	10584	3.39248
														E11	35144	10440	3.36628
														E12	35830	10271	3.48846
														F10	38677	8738	4.4263
														F11	37345	9006	4.14668
														F12	37486	8968	4.17997
														G10	38836	8779	4.42374
														G11	38357	9168	4.18379
														G12	39349	8626	4.56167
														H10	39634	8430	4.70154
														H11	39925	8386	4.76091
														H12	38917	8653	4.49752
[truncated: 152 more columns]

## Sheet: 30 °C
Titrations of NAD-Snifit with NAD+ at 30 °C
Wavel.	540	541	542	543	544	545	546	547	548	549	550	551	552	553	554	555	556	557	558	559	560	561	562	563	564	565	566	567	568	569	570	571	572	573	574	575	576	577	578	579	580	581	582	583	584	585	586	587	588
A10	5730	4677	3654	3192	2610	2276	2262	2290	2144	2132	2054	2759	2960	3344	3488	4228	4132	4932	5601	5642	6107	6860	7324	7681	8439	9129	9593	9701	10380	11161	12173	11661	12665	13043	12424	13222	13208	13906	13843	13603	13563	13791	13810	12485	12952	12709	12304	12599	12300
A11	5759	4748	3542	2976	2447	2478	2533	2183	2459	2595	2354	2880	3104	3420	3597	3727	4240	4627	5371	5899	6252	7076	7264	7884	8660	9504	9653	10167	10728	11296	11704	11801	12638	12813	13039	13229	13619	13838	13551	13728	13285	14218	13119	13380	12561	12981	12498	12096	11748
A12	6420	4535	3501	2948	2543	2110	2104	1974	2240	2207	2216	2246	2969	3386	3300	3627	4304	4293	5219	5577	6059	6401	7000	7200	7670	8457	8850	9529	9862	10436	10837	11175	11904	12413	12119	12326	12410	12444	12828	12710	12258	12383	12538	12421	12006	12355	12411	11337	11145
B10	6292	4884	3474	3067	2574	2210	2399	2233	2129	2276	2630	2899	3295	3522	3978	4186	4809	5427	5819	6264	6849	7900	8303	9034	9576	10497	10310	11440	11653	12716	12784	13725	14125	14570	15287	15027	15150	15284	16236	15359	15538	15699	15270	14760	15099	14514	14844	14713	13535
B11	6268	4130	3471	2672	2500	2507	2287	2060	2274	2586	2768	2801	3241	3440	3905	4402	4930	5153	5980	6128	6694	7618	8434	8660	9232	10466	11066	11233	12432	12591	13573	13814	14063	15150	15561	15626	15352	15364	15710	15701	15413	15765	15162	15810	14858	14801	14406	14388	13800
B12	6163	4413	3625	2825	2404	2079	2188	2254	2124	2385	2469	3094	3487	3458	3987	4392	5064	5167	6046	6355	7181	8347	8218	8959	9882	10018	10935	11387	12434	12932	13195	13729	14895	14270	15023	15097	15596	16087	15849	16380	15936	16159	15865	16084	14780	14845	14876	14310	13439
C10	6687	4654	3670	3132	2711	2493	2481	2763	2478	2731	3109	3561	3873	4359	5127	5098	5712	6507	7390	8277	8852	9575	10442	11345	12677	13144	13933	14687	15254	16285	17365	17213	18827	19441	19512	20281	19535	19502	19938	20772	19768	19768	20131	19172	19557	19316	18304	18342	18338
C11	6254	4573	3484	3047	2611	2728	2450	2480	2658	2897	2932	3425	4000	4187	4946	5100	5764	6471	7198	8198	8938	9812	10405	11039	12289	13163	14646	15040	15446	16259	17268	18355	18868	19063	19648	19693	20678	20642	20737	20842	20932	20914	20829	19764	19740	19376	19514	18756	17638
C12	6312	4551	3639	3121	2676	2561	2651	2384	3062	2687	3391	3490	4132	4535	4849	5455	5959	6745	7188	8148	8801	9717	11222	11780	12593	13678	14388	15103	16309	16656	18349	18103	19741	20012	20146	20019	19948	20951	21079	20969	21322	21277	21266	21033	20251	19714	19418	19123	17816
D10	6393	4865	3715	3310	3059	2910	2927	3141	3237	3545	4057	4810	5050	5720	6289	7065	8369	9373	9618	10801	11854	13604	14537	15439	17367	18237	18800	21123	22232	23455	24339	25652	26257	26923	27065	28204	29025	28477	29389	28749	28609	29023	28508	28421	28625	27091	27247	26220	25383
D11	6753	4764	4330	3445	2706	2951	2735	3153	3684	3852	4117	4772	5264	5995	6542	7169	8392	9031	10066	11258	12704	13971	15305	16338	17619	19170	20362	20768	22540	23654	25129	25462	26103	27815	27281	27694	28109	29002	30045	29733	28660	29496	29479	29020	28458	28639	27836	26528	26544
D12	6461	5023	3838	3282	3018	2964	2796	3257	3327	3719	4065	4364	5348	5927	6514	6693	8518	8870	10083	11312	12173	13602	14790	15344	17493	18937	19865	21622	23028	23160	25128	25487	27241	27352	28132	28784	28689	29568	29745	29666	29740	29707	29262	28959	28794	27994	26951	26952	26225
E10	6419	4871	3975	3426	3167	3354	3337	3257	3451	4066	4871	5016	5944	7073	7499	7977	9332	10393	11669	12733	14186	15378	17229	18200	20496	21775	23064	24685	25379	27353	28796	29205	31087	32393	32193	33338	33844	33810	34163	34843	34756	34659	34209	33666	33503	33536	30942	31849	30691
E11	6602	4761	3867	3905	3151	3261	3705	3378	3654	4107	4372	5005	5558	6405	7615	8357	9156	10820	11591	13214	13837	15771	17533	18723	20840	21354	23509	25193	26386	27240	28997	29666	30820	31740	32968	32836	34536	34763	34921	34686	33538	34330	34250	34413	32971	32347	31831	31954	31131
E12	6799	5173	3961	3593	3391	3260	3325	3591	4120	4027	4599	5245	5980	6938	7602	8164	9888	10913	12420	13302	14737	15702	17710	18995	20933	22444	23446	25739	26554	28693	28901	30478	31707	33115	33491	33611	34741	34730	35134	34692	35361	34955	34475	35033	34117	33324	32159	32116	31190
F10	6507	5146	3740	3535	3406	3116	3549	3531	3836	4642	4816	5440	6109	6979	7940	8767	10232	11021	12819	13894	15299	16968	18527	19353	21226	23135	24217	26053	27596	28934	30879	31089	32729	33925	34513	33777	35868	36264	37077	37062	37654	36058	35769	34756	34982	34744	33670	32478	31705
F11	6584	4748	3941	3927	3338	3371	3567	3518	4094	4153	5453	5562	6048	7185	7855	8845	10083	11071	11993	13479	15068	16193	18566	19151	20979	23190	24615	26427	27499	29459	29975	30984	32433	33660	33460	34969	36350	36837	35863	36326	36691	35482	35811	36087	35102	34957	34499	33389	31812
F12	6643	5344	4030	3573	3404	3608	3166	3750	4035	4414	5070	5279	6127	7007	7753	8661	10189	11502	11985	14359	15778	16700	18056	18723	21573	22725	24264	25708	27125	28440	29999	29747	31806	33345	33216	34473	35073	35667	34961	36638	35289	35717	36265	34433	35004	34022	33240	31762	31882
G10	6811	5337	3969	3574	3221	3711	3416	3948	3959	4211	5048	5442	6185	7217	7537	9206	10251	11601	12843	13664	15261	16704	18387	20427	21555	23240	25115	26108	27749	29347	30006	31592	33706	33689	35498	35301	36210	36474	37729	38052	36688	37773	36411	36557	36003	34781	34521	33431	32050
G11	7042	5239	3953	3553	3330	3498	3604	3494	3869	4554	4918	5736	6429	7054	7904	8876	10277	11389	12582	13910	15680	16592	19208	19950	21708	23330	24687	26668	28892	29843	30648	32111	33894	34024	35573	36153	36897	36848	37547	37695	36367	37575	37052	36644	37330	34676	34442	33787	32808
G12	6654	5069	3772	3960	3283	3339	3264	3586	3979	4383	5278	5567	6310	7189	7885	8474	10738	11314	12848	13817	14914	16503	19059	19746	21035	23315	25361	25694	27608	29032	30426	31903	32123	33964	34719	35596	35896	37224	37240	36728	37504	36145	35867	37004	35083	34434	33567	33251	31425
H10	6326	5224	3944	3628	3361	3401	3260	3797	3845	4630	5248	5939	6513	7562	8124	9573	10304	11646	12834	14817	15469	16621	19220	19856	21726	23131	24795	26429	28954	30018	31295	32322	33628	34847	36171	35617	36325	37335	37591	37277	37758	37230	37221	36567	35979	35612	34727	33438	33906
H11	6033	4822	4190	3480	3645	3322	3483	3758	4183	4530	4986	5805	6373	6921	7944	8875	10523	11210	12893	14244	15368	17465	19399	20017	21758	23304	24486	27127	29929	29376	32107	32407	33939	34490	35063	35741	36240	37914	37944	38126	37571	36753	37424	36836	36216	35045	35174	34543	32228
H12	6969	5007	4434	3742	3379	3479	3550	3758	3862	4625	5305	5508	6435	7439	7625	9097	10600	11496	13498	13993	15267	17645	19470	20384	21331	24125	24851	25853	27619	29993	31593	32497	33498	34605	35041	36154	37174	36854	37356	37716	38377	36392	38082	36668	36586	35756	34639	34164	32687
															TMR int.	SiR int.	Ratio (TMR/SIR)			[NAD+] (M)	Mean Ratio (TMR/SIR)	SD
														A10	13906	21343	0.651549			0.02	0.643789	0.0067348
														A11	13838	21640	0.639464			0.002	0.788073	0.0325715
														A12	12444	19433	0.640354			0.0004	1.21646	0.0801565
														B10	15284	20255	0.754579			8e-05	2.3522	0.0727719
														B11	15364	19448	0.790004			1.6e-05	3.69796	0.0516129
														B12	16087	19627	0.819636			3.2e-06	4.50035	0.31043
														C10	19502	17155	1.13681			3.2e-07	4.6356	0.175247
														C11	20642	16983	1.21545			3.2e-08	4.59246	0.044333
														C12	20951	16152	1.29711
														D10	28477	12449	2.28749
														D11	29002	12404	2.33812
														D12	29568	12163	2.43098
														E10	33810	9132	3.70237
														E11	34763	9277	3.74722
														E12	34730	9530	3.64428
														F10	36264	8448	4.29261
														F11	36837	7584	4.8572
														F12	35667	8197	4.35123
														G10	36474	8198	4.44913
														G11	36848	7906	4.66076
														G12	37224	7760	4.79691
														H10	37335	8130	4.59225
														H11	37914	8336	4.54822
														H12	36854	7948	4.63689
[truncated: 152 more columns]

## Sheet: 37 °C
Titrations of NAD-Snifit with NAD+ at 37 °C
Wavel.	540	541	542	543	544	545	546	547	548	549	550	551	552	553	554	555	556	557	558	559	560	561	562	563	564	565	566	567	568	569	570	571	572	573	574	575	576	577	578	579	580	581	582	583	584	585	586	587	588
A10	5976	5208	3593	3170	2857	2499	2192	2334	2293	2573	2827	3005	3218	3742	3963	4231	5148	5450	5390	6485	6927	7629	7853	8834	8791	10028	10756	11392	11509	12072	12799	13022	13320	13970	14172	14269	14855	14323	14805	14551	14849	14441	14649	14225	13925	13510	13589	13294	12922
A11	6226	4827	3714	3492	2815	2240	2416	2418	2396	2571	2643	3117	3587	3475	3897	4081	5056	5203	5741	6530	6487	7555	8041	8427	9194	9679	10273	10867	11471	12270	12044	12696	13358	13315	13674	13797	14270	14147	14650	14609	14727	13768	13868	14370	13393	13360	13297	12890	13110
A12	5784	4652	3803	3133	2480	2475	2312	2318	2735	2408	2740	2742	3022	3368	3870	4074	4344	4827	5459	6307	6307	6659	7395	7978	8128	9389	9653	10609	10629	11676	12194	11560	12626	13559	12910	13364	13237	14005	13625	13551	13851	13847	13081	13533	12898	12858	12695	12909	12226
B10	6263	4669	3748	3132	3048	2446	2537	2553	2577	2772	2760	3283	3914	4170	4387	4927	5325	6065	6820	7554	8332	8572	10100	10629	11886	12069	12619	13657	13910	14455	15017	15723	16282	16969	16947	17690	17935	17559	17659	17927	17624	17905	17944	17089	17267	17111	16504	16267	15342
B11	5944	4786	3856	3242	2548	2354	2428	2657	2691	2444	2935	3369	3726	4279	4294	4873	5325	6423	6784	7940	8400	9031	9339	10382	11162	11999	12151	13279	14042	14574	15290	16285	15999	16907	17367	17983	18202	18234	17844	17966	18533	18019	18010	17460	16610	16604	16935	16184	15566
B12	5889	4916	3923	3442	2758	2571	2459	2517	2579	2906	2934	3652	4009	4478	4752	5126	5989	6221	6746	7872	8167	9085	10004	10478	11241	12222	12763	13692	14112	14894	16265	16357	15659	17326	17253	18050	18134	18143	18763	18308	18101	18477	18159	18114	18162	17114	16743	16536	15561
C10	6082	5210	3937	3341	2768	2958	2982	3022	3295	3559	4219	4179	4574	5398	5835	6950	7531	8292	9389	10356	10908	12097	13220	14097	14598	15788	16895	18556	19332	21038	21865	21535	22326	23550	24095	23861	24358	24679	25475	24569	24835	25248	25083	24664	24159	23693	23197	22240	21572
C11	6037	5143	3704	3300	2981	2952	2836	3039	3107	3543	3608	4155	4657	5256	5908	6603	7031	8298	9060	9989	10550	12100	13169	13937	15673	16578	17615	17907	19355	19841	21486	22158	22899	23413	23503	23832	23991	24730	24789	25079	24431	24394	24845	23498	23517	23093	22946	21646	22082
C12	6264	4953	3851	3475	2930	2875	2795	2997	3153	3470	3633	4318	5002	5261	5718	6649	7533	8519	9572	10463	10578	11969	12842	14203	15087	15854	17256	18216	19532	20381	21219	21598	22823	23481	24089	24837	24912	25178	25265	26320	25415	25104	24711	24561	23711	24155	23561	23063	21952
D10	6099	5199	4054	3471	3095	3171	3317	3325	3553	4340	4711	5049	5753	6659	7191	7892	9644	9908	11487	12544	13795	14641	17229	17720	18854	21414	21852	23294	23481	25414	27158	27708	28694	28804	30368	30359	31138	31268	32185	31964	31300	32329	32091	32414	30911	30138	29978	29143	27984
D11	6056	5093	4080	3611	3259	3006	3242	3673	3699	4006	4639	4975	5976	6726	7572	8091	9772	10204	11543	12356	13546	14732	16990	18143	18365	20813	21359	23029	24176	26511	27163	28622	28741	29838	30643	30694	32161	31890	32303	32238	32565	31964	32443	31371	31234	29737	29710	29543	27865
D12	6266	5083	4226	3596	3342	3333	3209	3638	3831	4237	5022	5355	5813	6749	7318	8484	9205	10508	11533	12843	13823	15203	16564	18154	19109	20851	22431	23797	24787	25934	26727	27969	29136	30278	30208	31148	32038	32027	32302	33184	31727	31860	32111	31591	31330	29854	29428	28828	28373
E10	6469	5284	4308	3748	3306	3137	3531	3559	3970	4672	4974	5500	6141	6927	8097	8980	10238	11386	12625	13409	14194	16262	18065	18726	21256	23087	23619	25732	27271	28183	29594	29872	31901	32752	33607	33518	33694	34863	35390	36046	35697	35039	34540	34379	32961	33676	32781	31390	31164
E11	6346	5544	4201	3833	3420	3456	3424	3423	3949	4712	4872	5497	6172	7558	8228	9451	10284	11458	13001	13680	14828	16648	18829	19571	20661	21912	24411	25468	26393	27905	29054	30484	31357	32850	33156	32078	34216	35460	35008	35136	34810	34583	34748	33792	33704	32007	32131	31315	29927
E12	6117	5153	4167	4038	3367	3335	3642	3718	3944	4390	4992	5682	6267	6990	8269	9231	10583	11431	12606	14196	15354	16785	18209	19632	21488	22978	23751	25778	26801	28121	29819	30060	31764	33380	33705	34762	34114	35088	35983	35259	35064	35333	35840	34664	34660	33755	32513	32578	31033
F10	6303	5464	4046	3714	3678	3552	3623	3672	4110	4766	5341	5693	6278	7106	8008	9288	10409	11719	12462	13825	15448	16968	19122	20499	21511	23420	25526	26734	28155	30009	30717	30786	31871	34537	34052	34834	35459	36337	36826	36335	37748	35999	36703	35244	35278	34465	33354	33351	32257
F11	6456	5501	4315	4077	3337	3354	3671	3626	4482	4706	5347	5849	6528	7341	8317	8728	10013	11127	13230	14574	15428	17758	18705	19888	21991	23419	24630	26490	28125	28969	30399	32741	33990	32985	34411	35254	35942	36277	36990	36594	36299	36330	35919	35992	35208	33592	33382	33523	31272
F12	6578	5543	4228	3387	3343	3699	3381	3715	4273	4595	5033	5301	6349	7274	8115	9270	10326	11119	12598	14029	14627	16885	18207	19560	21496	23149	24506	26597	27308	28242	30360	30552	32574	32657	33988	34001	36132	35565	34713	35119	36095	34725	35279	34247	33964	33476	33612	32005	31884
G10	6370	4978	4339	3795	3681	3426	3606	3784	4170	4681	4963	5481	6491	7363	8408	9485	10635	11602	13182	14010	15593	17173	19295	20098	22214	23306	24868	26079	28275	29741	31404	31831	32304	33603	34729	35128	35302	36353	36135	36418	36626	35991	35398	36048	35806	34362	33756	32893	32375
G11	6569	5300	4092	3736	3700	3521	3608	3830	3950	4681	5166	5768	6515	7514	8425	9454	10487	11437	12563	13800	15451	16852	18689	20408	21727	23911	24914	26563	26974	28165	30435	31727	32782	33421	34112	35121	36012	36153	36915	36310	36158	35901	35522	35191	35534	34017	33162	32594	31323
G12	6717	5362	4522	3608	3958	3399	3452	3797	4506	4634	5084	5689	6544	7356	8179	9055	10546	11354	12829	14268	15231	16684	18331	19160	21605	23194	23616	24957	27490	28663	29831	31309	31739	33274	33695	34672	34278	35611	36503	36288	36111	35823	34868	34620	34463	33691	32722	32434	31500
H10	6567	5040	4231	3779	3219	3802	3477	3994	4282	4504	5501	5846	6796	7113	8035	9028	10193	11596	12897	13827	15605	17047	19010	19813	21629	23449	24513	25867	27111	29462	30361	31674	31900	34649	34142	34689	36083	36289	35745	36674	36173	37130	36421	35184	34746	33369	33922	33083	31744
H11	6416	4895	4210	4060	3351	3487	3699	3930	4150	4410	5474	5757	6436	7560	8704	9819	10260	11065	12996	13897	15595	17427	19235	20452	21259	23421	25565	26149	27741	29519	30971	31474	32370	33162	35021	34679	35230	36238	36372	35851	35992	36572	36157	35440	35050	34068	33128	31381	32006
H12	6257	5589	4558	3622	3588	3169	3657	3684	4060	4879	5284	6037	6664	7466	8006	8990	10182	11554	12900	14068	15025	17222	18840	19949	21899	23377	24562	26082	27650	28331	29997	30981	32257	33415	33791	33758	35365	35813	35358	36538	35267	35127	35033	35127	33874	33394	33150	31813	32006
															TMR int.	SiR int.	Ratio (TMR/SIR)			[NAD+] (M)	Mean Ratio (TMR/SIR)	SD
														A10	14323	20230	0.708008			0.02	0.718488	0.0155258
														A11	14147	19213	0.736324			0.002	1.0059	0.0196675
														A12	14005	19694	0.71113			0.0004	1.73927	0.0554541
														B10	17559	17449	1.0063			8e-05	3.09098	0.0965572
														B11	18234	17783	1.02536			1.6e-05	4.15583	0.139691
														B12	18143	18400	0.986033			3.2e-06	4.47153	0.0728637
														C10	24679	14694	1.67953			3.2e-07	4.63043	0.148381
														C11	24730	14138	1.74919			3.2e-08	4.62345	0.141033
														C12	25178	14073	1.7891
														D10	31268	10356	3.01931
														D11	31890	10446	3.05284
														D12	32027	10006	3.20078
														E10	34863	8544	4.08041
														E11	35460	8214	4.31702
														E12	35088	8621	4.07006
														F10	36337	8030	4.52516
														F11	36277	8060	4.50087
														F12	35565	8104	4.38857
														G10	36353	7967	4.56295
														G11	36153	7531	4.80056
														G12	35611	7865	4.52778
														H10	36289	8130	4.46359
														H11	36238	7749	4.67647
														H12	35813	7571	4.73029
[truncated: 152 more columns]
