# Supplementary material for: Semisynthetic biosensors for mapping cellular concentrations of nicotinamide adenine dinucleotides
Source: eLife. 2018 May 29;7:e32638. doi: 10.7554/eLife.32638 (PMC5990361; doi:10.7554/eLife.32638)
Supplement: Appendix 1—figure 1—source data 6. [file elife-32638-app1-fig1-data6.xlsx]

## Sheet: App1_Figure_1g
Titration of NADP-Snifit with NADPH/NADP+ ratios at different temperatures
	37 °C			25°C
[NADPH]/[NADP+]	Ratio (TMR/SiR)	SD	[NADPH]/[NADP+]	Ratio (TMR/SiR)	SD
55	2.9639	0.04	50	2.82	0.0361
25.3612	2.32615	0.0151	20.2462	2.073	0.0174
20.2462	2.05888	0.03914	12.4189	1.711	0.0293
16.7907	1.87298	0.02575	10.9486	1.403	0.0166
12.4189	1.63074	0.01572	6.71102	1.29	0.0183
10.9486	1.46918	0.10792	3.49673	1.035	0.00568
6.71102	1.28326	0.02269	2.71617	0.868	0.0189
3.49673	1.06247	0.05363	0.975	0.658	0.00928
0	0.695	0.07988

## Sheet: 25 °C
Titration of NADP-Snifit at different NADPH/NADP+ ratios 25 °C
Wavel.	540	541	542	543	544	545	546	547	548	549	550	551	552	553	554	555	556	557	558	559	560	561	562	563	564	565	566	567	568	569	570	571	572	573	574	575	576	577	578	579	580	581	582	583	584	585	586	587	588
A4	4605	4113	3774	3359	3635	3926	4329	5036	5183	6017	6691	7458	8499	9416	10590	12036	13525	14906	16600	18402	20041	22266	24090	25823	28230	30603	32495	33867	36174	37329	39749	40792	42705	43886	44778	45697	45714	47612	47168	47213	47453	46699	46528	46547	45441	44485	43761	42955	41671
A5	5253	4167	3837	3501	3778	3971	4391	4692	5119	6181	6479	7348	8623	9860	10454	12105	13799	14713	17018	17928	19777	21968	24551	26036	27890	30318	31803	33839	36409	37734	40303	41019	42113	44107	45337	46282	46639	46949	47356	47124	47383	47404	46401	46123	45713	44982	43525	42822	41412
A6	5098	3941	3800	3439	3695	3747	4105	4583	5302	6002	6506	7682	8214	9517	10462	11852	13086	14393	16708	17676	20346	21769	23765	25589	27635	29662	31721	33972	35163	36796	38586	40502	41401	42637	43844	45199	45587	46076	45999	47090	46312	46536	45871	44802	44381	43130	42158	41885	40766
B4	5038	4153	3592	3464	3509	3609	3967	4205	4721	5559	5945	6917	7841	8910	9869	10973	12090	13607	15414	16379	18261	19701	21784	23383	25047	27015	29125	30159	31814	33264	35681	37276	37585	39142	40262	41223	41059	41861	41683	42460	41347	41145	41556	40273	40366	39653	38402	37671	36639
B5	4962	3835	3448	3460	3285	3678	3899	4280	4568	5134	5958	6572	7646	8516	9210	10688	11652	13275	14648	16030	17549	19495	21294	22771	24303	26406	28539	29307	30779	32174	33713	35521	36646	37271	38803	40244	39733	40251	40744	40962	40784	40463	39925	39951	38904	38475	36699	36676	36119
B6	5179	3891	3494	3420	3491	3532	3846	4220	4545	5273	5825	6643	7531	8334	9365	10551	11259	12725	14775	15973	16938	19230	20800	22070	23775	26229	27878	29198	29901	31817	33861	35554	36508	37014	38471	39124	39930	40465	40047	40058	39951	39637	39786	38775	38523	37631	36582	36121	35388
C4	4883	4038	3529	3239	3252	3428	3763	4078	4330	4986	5580	6248	7217	8044	8795	10093	10963	12387	13759	14929	16626	18263	19787	21249	22919	24471	25557	27808	29338	30294	31704	33377	34416	35420	36191	36460	37534	37364	37645	37753	38028	37781	37552	36843	36361	35104	34728	34047	33026
C5	5058	3993	3439	3174	3215	3410	3685	3891	4253	4758	5359	6048	6948	7556	8583	9679	10658	11885	13255	14539	15943	17598	19350	20571	22297	23992	24982	26618	27576	29091	30603	32206	32775	33673	34861	35896	35774	35924	36440	37009	36442	36004	35955	35750	35386	34439	33213	32894	31493
C6	4520	3492	3249	3172	3087	3227	3614	4098	4463	5191	5415	6314	7266	7951	9088	10228	11021	12600	14008	15064	16856	18319	19824	21111	23184	24415	26767	28266	29714	30864	32617	33751	34531	35317	36636	37490	37962	38333	38882	38978	38338	37647	38219	37758	37073	35801	35620	33939	33336
D4	4927	3818	3328	3028	2908	3076	3407	3480	3911	4339	4742	5414	5982	6895	7539	8556	9562	10696	12020	12770	13995	15408	16961	17832	19728	20874	22488	23257	24582	25463	27065	28146	28525	29761	30063	30704	31360	31182	31836	32106	31979	31632	31463	30889	30387	29700	28847	28598	27743
D5	5048	3820	3282	2957	3007	3085	3230	3607	3954	4506	4667	5451	6301	6869	7564	8697	9548	10706	12060	12742	14388	15561	17025	18294	19672	20908	22418	23977	24742	25709	27070	28323	29187	29833	30697	31197	31886	32059	32218	32329	32220	32700	31787	31037	31465	30061	29451	29180	28162
D6	4896	3738	3208	3005	3016	3084	3361	3516	3697	4543	4944	5485	6236	6960	7888	8733	9590	10834	11844	13044	14662	16028	17369	18245	19923	21295	22766	24220	25005	25778	27568	28785	28993	30202	30655	31408	31923	32384	32412	32514	32235	32528	31880	31355	31062	30068	29512	28745	27973
E4	4790	3574	3265	3060	2939	2902	3139	3460	3845	4069	4829	5143	5873	6664	7343	8352	9244	10208	11402	12414	13525	14913	16697	17211	18639	20240	21112	22428	23073	24411	26227	26865	27317	28517	29221	29838	30253	30861	30579	30641	30760	30315	30361	29474	29413	28571	27959	27455	26629
E5	4672	3682	3242	3023	2992	3140	3148	3536	3852	4341	4868	5421	6257	6676	7384	8530	9440	10189	11456	12575	14183	15341	16552	17936	18950	20772	21684	23252	24316	25537	26219	27791	28596	28898	29988	30587	30736	31161	31948	31436	31123	31362	30476	30724	29732	29077	28326	28589	27392
E6	4401	3675	3203	3011	2894	3168	3347	3436	3852	4281	4677	5345	6130	6777	7720	8569	9151	10346	11640	12355	14108	14795	16906	17801	19061	20476	22034	22836	23905	25279	26523	27739	27602	29224	30009	30501	30713	31268	31244	31475	31125	30661	30881	29874	29829	30007	27979	28302	27023
F4	4428	3471	3098	2729	2683	2656	2932	3180	3286	3821	3975	4869	5266	5800	6642	7313	7933	8894	10148	10899	11715	13121	13984	15101	16627	17529	18450	19965	20760	21620	22570	23170	24028	24868	25604	25774	26304	26412	26394	26551	26157	26227	26212	25840	25156	24870	24301	24016	23220
F5	4669	3655	3008	2800	2658	2889	2939	3197	3503	3982	4334	4767	5406	6056	6879	7756	8327	9378	10373	11376	12529	13307	14528	15377	16838	18084	19233	20666	21152	22448	23378	24176	24844	25625	26224	27205	26638	27313	27512	27676	27157	27359	27195	26697	26159	25923	25062	24903	23839
F6	4682	3658	3042	2810	2767	2912	3170	3211	3538	3912	4377	4970	5585	6093	6927	7740	8409	9203	10558	11492	12566	13789	14666	15920	17293	18195	19025	20429	21489	22842	23926	24755	25484	25852	26950	27182	26870	27558	28145	27326	27608	27664	28048	27227	26432	26248	25411	24944	23991
G4	4399	3292	2959	2697	2539	2550	2661	2903	3247	3591	3980	4356	4779	5222	6035	6781	7471	8376	9401	10119	10943	11734	12615	13642	15044	16333	16762	18252	18459	19732	20463	21323	21699	22397	22848	23884	23672	23619	23683	24177	23923	23885	23342	23019	22774	22110	21753	21181	20512
G5	4342	3546	2915	2625	2584	2606	2739	2986	3030	3384	3881	4188	4745	5519	5979	6857	7257	8266	8962	9720	10874	11498	12848	13615	14854	15694	16497	17793	18357	19458	20438	21352	21295	21748	22875	22915	23448	23754	23857	23213	23347	23472	23075	23096	22664	22128	21542	21240	20311
G6	4451	3376	2948	2677	2487	2712	2803	2915	3193	3510	4053	4515	5004	5641	5874	6946	7631	8396	9187	9918	11390	12371	13025	14062	15579	16420	17114	18232	19071	20143	20661	21931	21927	22874	23619	24276	24091	24192	24720	24390	24382	24211	23514	23739	22826	22847	21917	21640	21114
H4	4241	3308	2792	2491	2479	2399	2538	2673	2944	3175	3479	4065	4424	4884	5538	6100	6645	7354	8241	8745	9611	10687	11401	12197	13088	14416	14763	15809	16305	17211	17517	18501	18779	19010	19837	20259	20274	20763	20441	20739	20675	19923	19814	19921	19714	19391	18870	18258	17899
H5	4074	3128	2776	2469	2330	2383	2535	2626	3006	3307	3472	3986	4550	4824	5548	6214	6627	7277	8231	8919	9645	10359	11288	11978	12884	14145	14796	15685	16204	17157	18113	18561	19217	19609	20611	20487	21085	20688	21055	20841	20972	20664	20281	19818	20083	19015	18689	18505	17870
H6	4298	3360	2810	2466	2373	2334	2607	2526	2903	3103	3500	3733	4177	4684	5266	5587	6407	6921	7844	8079	9250	9799	11003	11613	12483	13443	14069	14917	15524	16244	17016	17802	17854	18018	18865	19418	19470	19821	19240	19520	19337	19452	19068	18893	18899	18151	17507	17215	16688
															TMR int.	SiR int.	Ratio (TMR/SIR)			NADPH/NADP+	Mean Ratio (TMR/SIR)	SD
														A4	47612	17115	2.78189			50	2.81987	0.0360894
														A5	46949	16625	2.824			20.2462	2.0726	0.0173845
														A6	46076	16146	2.85371			12.4189	1.71065	0.029309
														B4	41861	20214	2.07089			10.9486	1.40342	0.016616
														B5	40251	19576	2.05614			6.71102	1.2899	0.0183023
														B6	40465	19354	2.09078			3.49673	1.03533	0.00567787
														C4	37364	21910	1.70534			2.71617	0.867689	0.0188518
														C5	35924	21328	1.68436			0.975	0.657762	0.00928421
														C6	38333	22002	1.74225
														D4	31182	22453	1.38877
														D5	32059	22899	1.40002
														D6	32384	22782	1.42147
														E4	30861	23841	1.29445
														E5	31161	24541	1.26975
														E6	31268	23951	1.3055
														F4	26412	25589	1.03216
														F5	27313	26215	1.04188
														F6	27558	26705	1.03194
														G4	23619	27892	0.846802
														G5	23754	26888	0.883442
														G6	24192	27717	0.872822
														H4	20763	31299	0.663376
														H5	20688	31973	0.647046
														H6	19821	29902	0.662865
[truncated: 152 more columns]

## Sheet: 37 °C
Titration of NADP-Snifit at different NADPH/NADP+ ratios 37 °C
Wavel.	577	667	Ratio (TMR/SiR)			NADPH/NADP+	Mean Ratio (TMR/SIR)	SD
A1	36365	15691	2.31757			55	2.98031	0.0806621
A2	36527	15750	2.31917			25.3612	2.30974	0.0149814
A3	36308	15838	2.29246			20.2462	2.04377	0.0389347
B1	34829	17343	2.00825			16.7907	1.85846	0.0255718
B2	35239	16898	2.08539			12.4189	1.61722	0.0155587
B3	34836	17096	2.03767			10.9486	1.45621	0.107408
C1	33062	18076	1.82906			6.71102	1.28386	0.0225081
C2	33042	17618	1.87547			3.49673	1.05109	0.0534269
C3	33206	17749	1.87087			0	0.685136	0.0795299
D1	30958	19343	1.60048
D2	31044	19031	1.63123
D3	30774	18997	1.61994
E1	27846	20662	1.34769
E2	29244	20051	1.45848
E3	29926	19153	1.56247
F1	26502	21069	1.25787
F2	26487	20423	1.29692
F3	26409	20365	1.29678
G1	24264	22634	1.07202
G2	22931	23154	0.990369
G3	24329	22302	1.09089
H1	17869	26488	0.674607
H2	16441	26891	0.611394
H3	19349	25148	0.769405
NADPH purified by gel filtration (NADPH/NADP+ = 55)
C1	33027	11393	2.89889
C2	33024	11075	2.98185
C3	32998	10783	3.06019

## Sheet: NADPH_stock_purity
Determination of the max Ratio (NADPH/NADP+) of NADPH tetrasodium salt (≥97%) Roche Cat#10621692001
(UV-Vis measurements)				ε(260,NADPH) M-1 cm-1	ε(340, NADPH) M-1 cm-1	ε(260, NADP+) M-1 cm-1		A260/A340 100% NADPH	A340/260 100% NADPH
Abs. (260 nm)	1.5379			14465	6220	17800		2.32556	0.430003
Abs. (340 nm)	0.6307		<--- fill this box
Abs. (280 nm)	0.3826
Abs. (290 nm)	0.1704
A260/A340 ratio	2.4384		<--- exp. Ratios
A260/A280 ratio	4.0196
A260/A290 ratio	9.02523
[NADPH] (M)	0.000101399	*
[NADP+] (M)	3.99818e-06
% NADP+	3.94303
[NADPH]/[NADP+]	25.3612
* prepared: 100uM NADPH solution
Corrected Ratio (NADPH/NADP+)	NADPH corr (uM)	NADP+ corr (uM)	NADPH (uM)	NADP+ (uM)	Prepared Ratio (NADPH/NADP+)
25.3612	101.399	3.99818	100	0
22.5296	100.892	4.47819	99.5	0.5	199
20.2462	100.385	4.9582	99	1	99
16.7907	99.3707	5.91822	98	2	49
12.4189	97.3428	7.83825	96	4	24
10.9486	96.3288	8.79827	95	5	19
6.71102	91.2588	13.5984	90	10	9
3.49673	81.119	23.1985	80	20	4
2.71617	76.049	27.9986	75	25	3
0.975005	50.6994	51.9991	50	50	1
