# Supplementary material for: Semisynthetic biosensors for mapping cellular concentrations of nicotinamide adenine dinucleotides
Source: eLife. 2018 May 29;7:e32638. doi: 10.7554/eLife.32638 (PMC5990361; doi:10.7554/eLife.32638)
Supplement: Appendix 1—figure 1—source data 7. [file elife-32638-app1-fig1-data7.xlsx]

## Sheet: App1_Figure_1h
Opening kinetic of NADP-Snifit upon injection of 5 mM NADPH at t = 0
Cycle Nr.	Time [s]	FRET intensity (a.u.)	Normalized FRET intensity
1	0.5	92894	1
2	2.6	88296	0.950503
3	4.5	85870	0.924387
4	6.5	83977	0.904009
5	8.5	82503	0.888141
6	10.5	81535	0.877721
7	12.5	79878	0.859883
8	14.5	79582	0.856697
9	16.5	77684	0.836265
10	18.5	77801	0.837524
11	20.5	76736	0.82606
12	22.5	76171	0.819978
13	24.5	75911	0.817179
14	26.5	75685	0.814746
15	28.5	74338	0.800245
16	30.6	73728	0.793679
17	32.5	73655	0.792893
18	34.5	72412	0.779512
19	36.5	72821	0.783915
20	38.5	72272	0.778005
21	40.6	71070	0.765066
22	42.6	71387	0.768478
23	44.6	70826	0.762439
24	46.6	70177	0.755452
25	48.5	69585	0.74908
26	50.5	70636	0.760394
27	52.6	69776	0.751136
28	54.5	69618	0.749435
29	56.5	69535	0.748541
30	58.5	69064	0.743471
31	60.6	68311	0.735365
32	62.5	68650	0.739014
33	64.5	68395	0.736269
34	66.5	68542	0.737852
35	68.5	67320	0.724697
36	70.6	68268	0.734902
37	72.6	67356	0.725085
38	74.6	67313	0.724622
39	76.5	67540	0.727065
40	78.6	67360	0.725128
41	80.6	67608	0.727797
42	82.6	66812	0.719228
43	84.5	67014	0.721403
44	86.5	67093	0.722253
45	88.5	66499	0.715859
46	90.6	66382	0.714599
47	92.6	66178	0.712403
48	94.6	66376	0.714535
49	96.5	66064	0.711176
50	98.6	64994	0.699658
51	100.6	66402	0.714815
52	102.5	65568	0.705837
53	104.6	65783	0.708151
54	106.5	65667	0.706902
55	108.6	65898	0.709389
56	110.6	65612	0.70631
57	112.5	65041	0.700164
58	114.5	64926	0.698926
59	116.5	65267	0.702597
60	118.6	65633	0.706536
61	120.6	65318	0.703146
62	122.6	65351	0.703501
63	124.6	65118	0.700993
64	126.6	64424	0.693522
65	128.6	64525	0.694609
66	130.6	65080	0.700583
67	132.6	65133	0.701154
68	134.5	65252	0.702435
69	136.5	65012	0.699851
70	138.6	64466	0.693974
71	140.6	64390	0.693156
72	142.5	64730	0.696816
73	144.5	64327	0.692477
74	146.5	64614	0.695567
75	148.6	64747	0.696999
76	150.6	64970	0.699399
77	152.6	63829	0.687116
78	154.5	63709	0.685825
79	156.5	64147	0.69054
80	158.6	63839	0.687224
81	160.6	63731	0.686062
82	162.6	63574	0.684371
83	164.5	63617	0.684834
84	166.5	64087	0.689894
85	168.6	63400	0.682498
86	170.5	63931	0.688215
87	172.5	63349	0.681949
88	174.6	63795	0.68675
89	176.6	63352	0.681982
90	178.6	64239	0.69153
91	180.6	63306	0.681486
92	182.6	64223	0.691358
93	184.6	63498	0.683553
94	186.6	63042	0.678644
95	188.6	63728	0.686029
96	190.6	63663	0.68533
97	192.5	63818	0.686998
98	194.6	63484	0.683403
99	196.6	63216	0.680518
100	198.6	64478	0.694103
101	200.5	62915	0.677277
102	202.5	63928	0.688182
103	204.6	63418	0.682692
104	206.6	63027	0.678483
105	208.6	64096	0.689991
106	210.6	63174	0.680065
107	212.6	63399	0.682488
108	214.6	63529	0.683887
109	216.6	63231	0.680679
110	218.6	62936	0.677503
111	220.6	63679	0.685502
112	222.5	63456	0.683101
113	224.6	63481	0.68337
114	226.6	63623	0.684899
115	228.6	63159	0.679904
116	230.5	62907	0.677191
117	232.6	63905	0.687935
118	234.6	63539	0.683995
119	236.6	63102	0.67929
120	238.6	63956	0.688484

## Sheet: App1_Figure_1i
Closing kinetic of NADP-Snifit following the injection of 1 mM NADP+ at t=0
Time [s]	FRET intensity (a.u.)	Normalized FRET intensity		Mean intensity before injection
-6	13221	0.99294		13315
-4	13446	1.00984
-2	13278	0.997221
0.5	31907	2.39632
2.6	33606	2.52392
4.5	33780	2.53699
6.5	35070	2.63387
8.5	35015	2.62974
10.5	35395	2.65828
12.5	35340	2.65415
14.5	35400	2.65866
16.5	35399	2.65858
18.5	35461	2.66324
20.5	35661	2.67826
22.6	35930	2.69846
24.6	35511	2.66699
26.6	35848	2.6923
28.5	35634	2.67623
30.6	35987	2.70274
32.6	35556	2.67037
34.5	35839	2.69163
36.5	35562	2.67082
38.5	35972	2.70161
40.6	35997	2.70349
42.6	35693	2.68066
44.6	36155	2.71536
46.5	35903	2.69643
48.5	35496	2.66587
50.6	36393	2.73323
52.6	35963	2.70094
54.5	36329	2.72843
56.5	36047	2.70725
58.5	35765	2.68607
60.6	35941	2.69929
62.5	36012	2.70462
64.5	35819	2.69012
66.5	36135	2.71386
68.5	36435	2.73639
70.6	36038	2.70657
72.6	35996	2.70342
74.6	35953	2.70019
76.5	36287	2.72527
78.5	35562	2.67082
80.6	36164	2.71603
82.6	36257	2.72302
84.5	36306	2.7267
86.5	35911	2.69703
88.5	36572	2.74668
90.6	35678	2.67953
92.5	36544	2.74457
94.5	35671	2.67901
96.5	36491	2.74059
98.6	35523	2.66789
100.6	35791	2.68802
102.6	36312	2.72715
104.6	36222	2.72039
106.5	36620	2.75028
108.6	36148	2.71483
110.6	36243	2.72197
112.6	35666	2.67863
114.5	36192	2.71814
116.5	36715	2.75742
118.6	36243	2.72197
120.6	36339	2.72918
122.6	36575	2.7469
124.6	36009	2.70439
126.6	36292	2.72565
128.6	35656	2.67788
130.6	36627	2.75081
132.6	35914	2.69726
134.5	36520	2.74277
136.5	36367	2.73128
138.6	36514	2.74232
140.6	36384	2.73256
142.5	36738	2.75914
144.5	36538	2.74412
146.5	36523	2.743
148.6	36465	2.73864
150.6	36659	2.75321
152.6	35932	2.69861
154.6	36022	2.70537
156.6	36191	2.71806
158.6	36321	2.72783
160.6	36386	2.73271
162.6	36132	2.71363
164.6	36496	2.74097
166.5	36612	2.74968
168.6	36435	2.73639
170.6	35872	2.6941
172.6	35967	2.70124
174.5	36036	2.70642
176.6	35923	2.69793
178.6	36240	2.72174
180.6	36216	2.71994
182.6	36365	2.73113
184.5	36453	2.73774
186.6	36757	2.76057
188.6	36472	2.73917
190.6	36388	2.73286
192.5	37014	2.77987
194.5	36356	2.73045
196.6	36219	2.72017
198.6	36290	2.7255
200.5	36207	2.71926
202.6	36295	2.72587
204.6	36754	2.76035
206.6	35958	2.70056
208.6	36470	2.73902
210.6	35764	2.68599
212.5	36175	2.71686
214.5	36278	2.7246
216.6	37094	2.78588
218.6	36696	2.75599
220.6	36520	2.74277
222.5	36522	2.74292
224.5	36279	2.72467
226.6	36432	2.73616
228.6	36168	2.71633
230.6	36336	2.72895
232.5	36489	2.74044
234.5	36667	2.75381
236.6	36862	2.76846
238.6	36452	2.73766
