# Supplementary material for: Semisynthetic biosensors for mapping cellular concentrations of nicotinamide adenine dinucleotides
Source: eLife. 2018 May 29;7:e32638. doi: 10.7554/eLife.32638 (PMC5990361; doi:10.7554/eLife.32638)
Supplement: Appendix 1—figure 1—source data 8. [file elife-32638-app1-fig1-data8.xlsx]

## Sheet: App1_Figure_1k
Titrations of NADP-Snifit labeled with BG-TMR-SPDZ or BG-TMR-SMX with NADP+
	BG-TMR-SPDZ			BG-TMR-SMX
[NADP+] (M)	Ratio (TMR/SiR)	SD	[NADP+] (M)	Ratio (TMR/SiR)	SD
0.001	1.47629	0.0708748	0.001	0.533564	0.0147685
0.0001	1.5944	0.0485132	1e-05	0.628042	0.017059
2e-05	1.83666	0.0719627	2e-06	0.812242	0.0186116
4e-06	2.39603	0.135002	4e-07	1.16118	0.0385955
8e-07	3.4379	0.133269	8e-08	2.07208	0.027568
1.6e-07	3.87771	0.0527209	1.6e-08	3.22016	0.0686848
3.2e-08	4.14817	0.0925876	3.2e-09	3.79725	0.149152
6.4e-09	4.17939	0.0555836	6.4e-10	4.06411	0.090724
1.28e-09	4.3952	0.0345646	1.28e-10	4.1236	0.108037

## Sheet: BG-TMR-SPDZ
Titration of NADP-Snifit labeled BG-TMR-SPDZ with NADP+ (from 10 uM NADP+, 5-fold serial dilution)
Wavel.	540	541	542	543	544	545	546	547	548	549	550	551	552	553	554	555	556	557	558	559	560	561	562	563	564	565	566	567	568	569	570	571	572	573	574	575	576	577	578	579	580	581	582	583	584	585	586	587	588
B4	2333	2086	2188	2246	2706	2828	3310	3948	4066	4510	4979	6036	6398	7195	8058	8861	9792	10863	11451	12737	14122	15339	16902	18494	19736	20760	22654	23253	25239	25691	26860	28100	29274	29355	30684	30618	31189	32005	31037	31926	31349	31592	32022	30965	29818	29608	28823	28041	27964
B5	2056	2091	2266	2252	2794	2990	3344	3679	4024	4408	5186	5406	6751	7124	7737	8439	9934	10623	11513	13065	14333	15327	16594	17850	18924	20714	21585	22343	24622	24801	26430	27782	27867	28859	30124	30535	29824	31624	31951	30871	31220	30636	30478	30281	29106	28847	28944	27746	26698
B6	2212	2310	2194	2315	2421	2891	3568	3565	3797	4417	5358	5579	6429	7159	7988	8802	10247	10686	12065	13175	13896	15544	16808	18304	19893	20916	21994	23202	24490	25311	27166	28070	29249	29535	30298	30293	30288	31271	32238	31399	31697	32293	31600	30454	29170	28752	29241	27841	27619
A1	2144	2183	2054	2418	2666	2870	3241	3560	3805	4138	4839	4884	5786	6600	7210	7997	9288	10246	10776	11987	13273	14148	15708	16050	17897	18727	20480	20607	22214	23711	24585	25500	26140	26833	27391	27397	27955	28267	27842	28619	28407	28042	28347	27774	26994	26092	25550	25365	25159
A2	2307	2173	2139	2517	2676	2489	3508	3733	3799	4491	5448	5495	6391	7152	8059	9154	9923	10652	12119	12595	13992	15431	16655	18216	19082	20394	22111	22798	24271	25011	26010	27417	27537	28841	29084	30003	29277	30817	31174	30193	30459	30029	29769	29168	28968	29036	27613	26935	25921
A3	2303	2070	2258	2401	2467	2771	3210	3423	3959	3990	4936	5463	5918	7308	7398	8573	9359	10310	11406	12064	13130	15140	16136	16757	18172	19236	20326	22379	23247	23169	24847	26122	26895	26985	28008	28630	28839	29732	29845	29195	29961	29062	29103	29393	27762	26991	26612	25361	25247
B1	2179	2383	2329	2589	2898	2838	3696	3925	3978	4835	5295	5976	6759	7922	8301	9265	10431	11648	12790	14208	14559	16447	17547	18729	20593	21427	23702	24761	26798	26399	28390	28886	30623	30520	31473	31623	32847	33029	34368	33185	32606	31923	31367	31854	31430	29982	29941	28808	28579
B2	2400	2305	2720	2750	3065	3184	3993	4038	4723	5258	6030	6759	7387	8118	9036	10370	11019	12417	13843	15109	16506	18420	19291	21243	22110	23973	25262	27742	28619	29602	30547	32557	32807	34194	33712	35391	35964	36879	35705	35738	36874	35019	35269	34716	33727	34188	32239	31938	30828
B3	2206	2333	2184	2255	2804	3180	3486	3690	4093	4859	5364	5718	6699	7370	7982	9119	10169	11465	12164	13481	14717	16707	16871	18532	20055	22178	22763	24012	25095	25637	28031	28627	29837	30338	31517	32975	31910	32281	32272	32645	32390	31624	32394	31714	31068	30475	29154	29732	28438
C1	2346	2713	2345	2751	2993	3332	3752	4330	4506	5640	5990	6805	8061	8733	9024	9995	11667	12785	14119	14905	16689	18289	20652	21768	22992	25324	25436	27170	29694	29924	30472	32516	33521	34864	35865	36267	36522	36612	37021	37211	37769	36197	36773	36684	34409	35204	33945	32252	30876
C2	2327	2325	2376	2607	2680	3089	3530	3651	4313	5026	5447	5801	7163	8226	8789	10063	10685	11925	13032	14580	15352	17356	18475	20081	21327	23278	24610	25582	27544	28071	29917	30472	31747	32578	33192	33900	34265	35297	34228	34947	34626	34455	34378	33787	32652	33544	31809	30116	29963
C3	2324	2491	2633	2558	2797	3242	3907	4332	4453	5448	6358	6640	6998	8607	8744	11039	11357	11804	14056	15561	16908	18048	20082	21064	21995	24201	24670	26725	29172	29722	30529	33145	33469	34504	35554	35040	36243	36234	36088	36572	36418	35902	36223	34846	34545	33996	33262	32345	31527
D1	2642	2476	2816	3131	3266	3717	4205	4829	5287	5790	7140	7624	8175	9335	10158	11640	12810	14378	15217	17614	18602	20688	22738	23889	26134	27794	29540	31037	32838	33792	35694	36751	38086	38699	40422	40679	41303	41158	42746	41981	42406	42262	41315	40264	40211	40306	38224	37208	36321
D2	2484	2419	2721	2823	3431	3499	4300	4558	5020	5568	6657	6919	8040	9095	9567	11297	12723	13983	15578	16680	18572	19917	21413	23037	25980	26585	28405	29677	32574	32736	33950	35191	37085	38649	39082	38724	40073	40653	40884	40690	40652	41243	40291	39589	38223	38186	35998	36593	34634
D3	2435	2658	2829	3113	3003	3552	4086	4527	4901	5695	6536	7217	7790	9583	9441	11036	12155	14450	15384	16855	18653	20262	21692	23086	26008	26850	27884	29780	31082	32742	34977	36580	37561	38502	39781	40149	40655	39861	41365	40779	40957	40665	40634	40570	39210	38092	36597	36143	35316
E1	2586	2596	2967	3116	3513	3715	4187	5051	5498	6219	6894	7569	9137	9642	10943	12474	14012	14352	15958	18299	19989	21436	23700	24393	27517	29495	30973	33080	34216	35986	37483	38438	39142	41331	42152	42633	43285	43581	44580	44077	43929	43649	43323	42207	42197	40595	40765	39116	38224
E2	2529	2494	2898	3031	3673	3327	4576	4846	5472	6249	6862	7501	8730	9423	10223	12118	13487	14956	16183	17645	20178	21682	23732	24176	26993	29080	29841	32210	34857	35750	36942	38266	39834	41331	41909	42616	43269	43290	44474	44118	42711	44150	42307	42882	42074	41019	39807	39062	38308
E3	2655	2604	2950	3166	3236	3632	4306	4939	5056	6030	6533	7117	8403	9583	10214	12093	13073	14517	15803	18218	19105	21174	22115	24544	26383	27971	29599	31021	32327	35078	36764	36405	38175	39865	41888	41909	41481	42598	43449	42592	42186	42466	41828	41767	40527	39721	38319	38508	37743
F1	2723	2687	2988	2909	3665	3982	4343	5165	5465	6201	7072	7291	8817	10118	11101	12613	13921	15546	16723	18214	19951	21803	23408	25138	27467	29567	31030	32929	34472	35797	39087	39989	40319	40728	42933	43268	43591	45481	44420	43970	44339	43490	44067	43446	42660	41491	40687	38546	39083
F2	2581	2715	3046	2782	3370	3851	4948	4805	5470	6103	6975	7896	8778	9935	10458	12336	14353	15596	17307	18589	19683	21635	23099	25427	27560	30228	30733	32281	34958	36216	36914	38993	40037	42731	41418	43621	44428	43890	44389	44926	44803	44114	44094	42769	42940	41012	40286	40770	38140
F3	2562	2761	2890	2826	3388	3491	4559	4629	5077	5792	6836	7444	8516	9720	10534	12582	13499	14814	16103	17818	18913	21204	21945	24166	25632	28731	30713	30909	32913	34700	35951	38245	39039	39800	40315	41818	42185	42417	43388	42970	41791	41486	41188	42008	40835	39509	38944	37564	36885
G1	2335	2639	2784	3393	3270	3489	4256	4968	5360	5934	6715	7775	8967	10142	11116	12255	14140	14668	16396	18255	19690	21661	24021	25686	27028	28958	31077	32930	34379	36036	37204	39770	41548	41059	42765	43248	43520	44307	44407	44126	44559	44163	43313	43269	42767	41534	40683	39013	38915
G2	2426	2421	2738	2942	3335	3673	4149	4611	5308	6250	6686	7377	8143	9386	10074	11719	12981	13504	15960	17480	19198	20804	22538	23159	26165	27568	28776	31435	33316	34031	36394	36966	37896	39623	40067	41008	41409	41982	42100	42469	42512	42390	42294	41438	40528	39576	38635	37644	36369
G3	2586	2662	2727	2878	3249	3647	4300	4765	5315	5657	6578	7824	8603	9489	10427	11085	12786	14274	16166	17615	19058	21034	22100	23774	26393	28309	29416	31534	32833	35280	36374	36823	39302	39591	40635	41400	41345	43466	43027	43092	43144	42360	42266	41293	41504	39397	38082	37085	36814
H1	2757	2657	2982	3233	3719	4127	4160	5102	5387	6070	7425	8187	9137	10167	10876	12306	14485	15325	16472	19215	20017	22103	24566	25403	27542	30918	31400	32899	36720	35716	37967	40037	40810	42100	43072	44418	44333	44987	46029	45467	45752	45394	44345	43767	43586	42020	40834	39894	39597
H2	2570	2532	2926	2991	3344	3664	4193	4734	5634	6086	7063	7751	8886	10065	10779	12126	13865	14500	16227	18503	19980	21583	23674	25011	26231	29013	30706	32435	33954	35638	36762	38738	39621	40839	41639	41820	43069	43201	43789	43583	44636	43941	43793	42149	42485	41199	40632	38201	36857
H3	2716	2721	2806	2917	3563	4049	4170	4825	5301	6169	7254	8037	8737	10292	10578	12904	13614	14729	16969	18531	19874	22311	24246	25158	27533	29664	31582	32935	34973	37418	36909	39727	40670	41714	43126	43128	43720	44865	45525	44991	44708	43606	44369	43107	42492	42249	41390	39304	38116
															TMR int.	SiR int.	Ratio (TMR/SIR)			[NADP+] (M)	Mean Ratio (TMR/SIR)	SD
														B4	32005	20563	1.55644			0.001	1.47629	0.0708748
														B5	31624	22241	1.42188			0.0001	1.5944	0.0485132
														B6	31271	21558	1.45055			2e-05	1.83666	0.0719627
														A1	28267	18370	1.53876			4e-06	2.39603	0.135002
														A2	30817	18931	1.62786			8e-07	3.4379	0.133269
														A3	29732	18392	1.61657			1.6e-07	3.87771	0.0527209
														B1	33029	18502	1.78516			3.2e-08	4.14817	0.0925876
														B2	36879	19219	1.91888			6.4e-09	4.17939	0.0555836
														B3	32281	17875	1.80593			1.28e-09	4.3952	0.0345646
														C1	36612	15246	2.40142
														C2	35297	13961	2.52826
														C3	36234	16044	2.25841
														D1	41158	12169	3.3822
														D2	40653	11324	3.58999
														D3	39861	11929	3.34152
														E1	43581	11411	3.81921
														E2	43290	11039	3.92155
														E3	42598	10944	3.89236
														F1	45481	10772	4.22215
														F2	43890	10505	4.17801
														F3	42417	10488	4.04434
														G1	44307	10757	4.1189
														G2	41982	10017	4.19108
														G3	43466	10280	4.22821
														H1	44987	10184	4.41742
														H2	43201	9919	4.35538
														H3	44865	10167	4.41281
[truncated: 152 more columns]

## Sheet: BG-TMR-SMX
Titration of NADP-Snifit labeled with BG-TMR-SMX with NADP+ (from 10 uM NADP+, 5-fold serial dilution)
Wavel. (nm)	540	541	542	543	544	545	546	547	548	549	550	551	552	553	554	555	556	557	558	559	560	561	562	563	564	565	566	567	568	569	570	571	572	573	574	575	576	577	578	579	580	581	582	583	584	585	586	587	588
A1	1644	1678	1699	1880	1742	2097	2240	2332	2743	3062	3296	3648	3953	4265	4725	5283	5731	6141	6587	7136	7853	8693	9755	9918	10163	11305	11569	12653	12669	12878	13947	13925	14280	14474	14985	15130	14995	15055	15074	15102	15189	15069	14254	14817	14176	14116	13626	13022	12797
A2	2094	1946	1765	1938	2192	2217	2593	2641	3119	3491	3898	3734	4434	5270	5254	5496	6378	6812	7407	8312	8764	9868	10117	10282	11423	11718	12868	13009	13956	14037	15229	15106	15432	15834	15707	16502	16276	16456	17132	16398	16715	16139	15901	15391	15573	15269	14752	14428	14290
A3	2004	1844	1755	1956	1991	2135	2465	2787	2817	3412	3653	3730	4097	4947	5128	5582	6406	6636	7169	8021	8554	9003	9853	10683	11463	11892	11895	13370	13898	13722	14289	14912	15718	15574	15251	16063	16368	16586	16415	16868	15889	16272	16173	15749	15523	15039	14716	14170	13474
B1	2027	1996	2268	2119	2449	2565	2769	3156	3492	3970	4334	4496	5236	5703	6098	7106	7005	8135	8951	9687	10686	11344	12440	12965	14290	14797	15608	16370	17393	17553	18260	19125	19847	20311	20173	21541	20386	21072	20740	20953	20210	20800	20764	19462	19570	18724	19385	18615	18041
B2	2026	1904	1820	2111	2399	2211	2667	2855	3322	3535	3871	4420	4969	5157	5940	6404	6744	7449	8706	8790	9906	10147	10611	11938	12975	13451	14299	14514	15438	16686	17059	17156	17766	17823	18576	18705	18589	19580	19645	19547	19452	18440	19027	18356	17989	17783	16767	17177	16737
B3	1920	2100	2098	2206	2398	2680	2833	3163	3440	3540	4210	4754	5053	5656	6066	6885	7199	7970	8708	9493	10788	11031	12304	13212	13828	14380	15421	15915	16622	17475	17664	18323	18985	19690	20298	20200	21075	21275	21480	20962	20304	20179	19738	20396	19001	18550	18364	17656	18172
C1	2308	2067	2458	2425	2866	2911	3276	3753	3842	4401	5368	5710	5679	6512	7270	8054	8796	9675	11109	12258	12697	13877	15240	16256	16586	17095	18751	20116	20762	21714	22598	24270	24493	24310	24978	25758	24364	25049	24232	24824	24244	24836	24889	24784	24315	23932	23927	22732	21833
C2	2307	2275	2460	2526	2798	2850	3328	3638	3767	4700	4765	5470	5969	6442	7582	7812	8397	10283	10917	11492	12607	13398	14577	15133	16351	17856	18741	19353	20265	21175	21751	22501	24117	23542	24653	24616	24664	25014	25317	25819	24956	25343	24813	24898	23898	23073	23102	22093	22073
C3	2326	2112	2446	2642	2936	3267	3405	3739	4399	4838	5124	5998	6453	6708	7279	8728	9168	10416	10750	12209	13011	14906	14591	16255	17530	18135	19847	20436	21433	22692	24223	24408	24994	25668	25112	25167	26454	26511	26949	26345	27088	25982	26302	24592	24867	24625	24195	23597	22639
D1	2718	2737	2816	2745	3213	3401	4184	4837	4971	5979	6274	7296	8064	8519	9146	10413	11339	13491	14471	15695	16472	17722	20058	20618	22235	24704	24862	25806	28235	28735	30248	31313	31991	32283	33084	34383	34290	34938	35402	34439	34756	35052	33727	32548	32959	33198	31286	31121	30193
D2	2580	2403	2522	2830	3130	3331	3840	4077	4652	5037	5691	6383	6954	7387	8676	9764	10191	11253	12455	13888	15034	16966	17356	17693	20149	19847	22370	23163	24458	25414	27620	27847	28973	28155	29153	30884	30090	30451	31390	30964	30675	30737	30565	30251	28237	28964	27489	28149	26704
D3	2955	2666	2850	3084	3424	3584	4244	4719	5219	5941	6274	7279	7970	8995	9867	10580	12045	12630	14375	15612	17181	18510	20097	21325	23788	23971	24931	27640	28904	30120	31443	31958	33862	33897	34710	34426	35869	35347	36214	36582	35302	35604	34951	34321	33732	32651	32983	32626	30669
E1	3075	3118	3186	3635	4035	4456	4850	5300	5408	6735	6993	8293	9249	10011	11462	12685	13640	15166	16770	18152	19752	21043	22923	24055	26909	27670	30226	31285	33554	34606	35094	36875	38185	38861	39669	40870	41055	41030	40638	40473	41805	40970	41010	39986	39674	38452	37960	35928	36138
E2	2728	2760	3011	3044	3919	3621	4577	4954	5561	5852	6305	7365	8314	9200	10029	11157	12777	13672	14988	16888	17623	19809	20385	22691	23527	25589	27066	28739	29379	30600	32443	33368	33839	35297	36000	36851	36774	37364	37855	36631	36904	38230	36449	35315	34775	34318	33781	33076	31552
E3	2901	3161	3247	3323	3879	4570	4863	5453	5860	6772	7470	8339	9112	10018	11119	12821	13528	15478	17109	18353	19949	23067	23177	24923	26772	27179	29841	32219	32827	34243	36238	36365	39342	39642	40666	42212	41646	41136	40953	41350	42579	42611	40785	42134	40414	39878	38425	37276	36710
F1	2923	3314	3444	3456	4031	4527	4841	5742	6255	6606	7800	8649	9893	10346	11660	13569	14214	15670	17472	18725	20820	22709	23742	26324	27409	28954	30597	32001	33850	35547	36689	38415	40000	40034	42159	42365	42657	43223	42510	43113	43382	42691	41347	41626	40672	40578	40417	38285	37322
F2	2773	2966	2630	3386	3630	3973	4261	4856	5589	5958	6700	7479	8258	9332	10075	11355	12691	13639	15136	16428	17756	19254	20825	22930	24547	25626	27033	28330	30689	31017	33073	34171	35600	35519	36595	37654	37178	36537	37522	38118	37620	37033	37885	36059	36057	35875	34148	33583	32643
F3	2914	3224	3297	3533	3725	4116	4872	5332	5801	6733	7651	8458	9712	10856	11509	13034	14295	15114	17044	18571	20250	21550	23957	25478	27875	28486	30397	32450	33994	35070	37013	37838	38483	39561	41541	41510	42116	42443	42677	42029	42831	42227	42063	42193	41053	39707	39520	38712	37113
G1	2795	2985	3178	3468	3677	4319	4838	5389	6056	7080	7736	9035	9526	9982	11159	12446	14219	16045	17361	18275	20829	22063	23518	25527	27125	28538	30942	32198	34567	35326	36902	37849	38995	39657	39970	41352	41508	42223	42941	43471	41832	43114	42505	40781	40804	39353	38842	37485	36283
G2	2813	2804	2968	3395	3808	4369	4322	5136	5558	6372	6798	8138	9178	9405	11328	11053	12581	14157	15264	17294	18608	19955	21034	23327	25134	26111	28387	29888	30001	32171	33762	34387	36308	36905	37548	38281	38790	38468	38575	39521	38329	39212	38927	38397	37109	35955	35772	35035	32958
G3	3006	2923	3291	3701	3954	4328	4623	5355	5972	6876	6952	8086	9534	10001	11389	13104	13842	15196	17250	17839	19870	21852	23405	24763	27369	28463	30175	30991	33450	35042	35199	36470	38918	38000	40034	40039	40607	42509	41426	41749	41763	42050	41181	41707	39523	39297	37465	37540	35675
H1	2990	2929	3361	3446	3709	4113	5345	5516	6032	6431	7432	8222	9535	10204	11417	12295	14239	15239	16523	18824	20109	21294	23615	25032	27060	28519	30376	31448	33302	34682	35469	37518	38635	40254	40068	40907	41418	42192	41730	42949	41782	41988	41116	40951	39931	40040	38669	38194	35770
H2	2877	2818	3013	3132	3552	4003	4485	4667	5130	6116	6742	7774	8687	9415	10670	11916	12399	13447	15403	16635	17951	20171	21050	22772	24085	25782	27357	28737	30931	31780	32528	34209	35497	35855	36654	37440	37915	38684	37953	38042	38457	37297	37112	38053	36729	35866	34809	34075	33203
H3	2860	2946	3423	3620	4025	4586	5042	5626	5957	6669	7485	8602	9446	10406	11453	13465	14219	15509	17094	18931	20680	21770	23977	25166	27916	28251	31479	32661	32980	35650	37409	37395	39995	41561	42238	42493	42798	42557	44452	43135	43689	43211	43116	43119	41603	40442	40532	38989	38735
															TMR int.	SiR int.	Ratio (TMR/SIR)			[NADP+] (M)	Mean Ratio (TMR/SIR)	SD
														A1	15055	24727	0.608849			0.001	0.533564	0.0147685
														A2	16456	25964	0.633801			1e-05	0.628042	0.017059
														A3	16586	25856	0.641476			2e-06	0.812242	0.0186116
														B1	21072	26237	0.803141			4e-07	1.16118	0.0385955
														B2	19580	23487	0.833653			8e-08	2.07208	0.027568
														B3	21275	26596	0.799932			1.6e-08	3.22016	0.0686848
														C1	25049	21248	1.17889			3.2e-09	3.79725	0.149152
														C2	25014	21060	1.18775			6.4e-10	4.06411	0.090724
														C3	26511	23736	1.11691			1.28e-10	4.1236	0.108037
														D1	34938	16890	2.06856
														D2	30451	14880	2.04644
														D3	35347	16822	2.10124
														E1	41030	12811	3.20272
														E2	37364	11817	3.16189
														E3	41136	12481	3.29589
														F1	43223	11139	3.88033
														F2	36537	10079	3.62506
														F3	42443	10921	3.88637
														G1	42223	10590	3.98706
														G2	38468	9238	4.1641
														G3	42509	10519	4.04116
														H1	42192	10057	4.19529
														H2	38684	9263	4.17618
														H3	42557	10641	3.99934
														A10	14511	28074	0.516884
														A11	16424	30137	0.544978
														A12	15806	29334	0.538829
Spectra of NADP-Snifit labeled with BG-TMR-SMX with NADP+ (1 mM NADP+)
Wavel. (nm)	540	541	542	543	544	545	546	547	548	549	550	551	552	553	554	555	556	557	558	559	560	561	562	563	564	565	566	567	568	569	570	571	572	573	574	575	576	577	578	579	580	581	582	583	584	585	586	587	588
A10	1707	1767	1755	1832	1993	2154	2557	2470	2823	2656	3295	3721	3914	4315	4977	5454	5515	6112	6485	6880	7532	8218	9023	9149	9997	10151	11147	11990	12174	12798	12633	13335	13386	13705	14368	14425	14175	14511	14570	14159	14304	13959	14245	13861	13045	13616	13055	12432	12797
A11	2604	2429	2609	2445	2870	3196	3624	3396	3616	3944	4255	4761	4961	5578	5804	6377	7230	7739	7855	8674	9168	9909	10200	10818	12185	12164	13652	13377	13884	14745	15076	15868	15944	15995	16623	16946	16955	16424	16369	16546	15931	16633	16018	15808	15558	15655	14734	14447	14167
A12	1815	1909	1917	1702	2157	2247	2420	2414	2794	3159	3707	3932	4543	4522	5211	5643	5868	6686	7038	7610	7889	8979	9619	10272	11076	11104	11554	12423	13512	13735	14003	14295	14616	14767	14992	14976	15773	15806	15751	15810	15198	15504	14826	15048	14268	13692	13336	13625	13340
[truncated: 152 more columns]
