# Supplementary material for: Semisynthetic biosensors for mapping cellular concentrations of nicotinamide adenine dinucleotides
Source: eLife. 2018 May 29;7:e32638. doi: 10.7554/eLife.32638 (PMC5990361; doi:10.7554/eLife.32638)
Supplement: Appendix 1—figure 1—source data 9. [file elife-32638-app1-fig1-data9.xlsx]

## Sheet: App1_Figure_1l
Emission spectra of SPR(WT)-EGFP-p30-SNAP titrates with NADP+
[NADP+]	100 uM	20 uM	4 uM	0.8 uM	160 nM	32 nM	6.4 nM	1.28 nM
Wavel. (nm)	Intensity (a.u.)
480	4024	4546	4667	4801	5123	5688	5628	6074
481	4398	4944	4746	5281	5618	6442	6828	6706
482	4968	5094	5636	5664	5721	6695	7685	7870
483	5315	5297	5479	5952	6661	7347	7770	8663
484	5864	6118	6277	6648	7390	8341	8870	9527
485	6501	6545	6915	6596	8493	9565	10220	11005
486	7485	7992	7510	8164	8961	10883	11231	12107
487	8862	8612	8671	9573	9526	12048	12875	13840
488	9010	9326	9471	10085	11767	13514	14274	15477
489	10122	10821	11024	11910	12328	15237	16548	17772
490	11894	11759	11649	12919	14183	16502	17763	19054
491	12794	12993	13370	14084	16061	18585	20738	21871
492	14020	14712	15011	15887	17680	20938	23040	24019
493	15603	15588	15837	16629	19180	22907	24895	26418
494	16519	17658	17618	18510	22229	25530	27443	29223
495	18618	18691	18525	20052	23341	26465	29709	31628
496	19634	20059	20830	22843	25553	29290	33308	35231
497	21039	21990	22350	23324	26947	31723	34830	36854
498	23399	22864	23916	26331	29622	34589	37749	40038
499	24605	24810	25121	28099	31852	37065	41446	43407
500	26350	27273	27514	28760	35059	38930	44183	46922
501	27283	27197	28212	31212	36218	42310	46536	49588
502	29411	29468	29902	32956	37893	45250	48946	51246
503	29985	30045	30880	33824	38285	46132	50339	53501
504	31562	31993	32506	34896	40557	47253	52226	55920
505	32951	32008	32902	36080	42020	48580	53942	57040
506	31889	32630	33797	36507	42207	49574	54799	57983
507	32701	33196	34744	36911	42786	50888	55379	59296
508	33382	33872	35098	37180	42958	51321	56504	59609
509	33553	33877	34462	37178	43636	51250	57449	59529
510	33437	33939	34713	37985	44321	51147	57217	58853
511	32603	32816	33952	37201	42123	50726	55657	58095
512	31504	31314	33215	36071	42430	49982	55620	57850
513	31293	31906	31974	35238	40727	48640	53123	56200
514	29731	30976	31755	34163	39492	46518	52789	54683
515	29307	29617	30085	33466	38294	45743	50121	52626
516	28170	28784	29917	32014	37253	44046	48989	50607
517	26850	27509	28570	29711	35688	41982	46172	49280
518	25353	27062	26679	28951	33289	40037	44407	46156
519	24704	24793	25966	27181	32709	38570	42469	43783
520	24198	23628	24169	26584	30981	36282	40058	42285
521	22239	23648	23803	25631	29279	35015	38135	40098
522	21359	21862	23201	24443	27980	32608	36673	37640
523	19973	20540	21321	23349	26479	30447	33975	36106
524	19678	19876	20199	22642	25945	30617	33132	35176
525	18449	18621	19706	20958	24394	28945	31776	32942
526	18036	18167	18862	20202	23659	27283	30617	31246
527	16997	17284	18124	19653	23213	26674	29493	31101
528	17405	16769	17000	18869	21879	25111	28084	29592
529	16471	16361	16142	17991	20415	23702	26988	28121
530	15747	15865	16745	17341	19755	23943	25258	27250
531	15128	15379	15578	16837	19493	22872	25303	26323
532	15188	15148	15565	16049	18838	22403	24300	25559
533	14085	14500	14958	16185	17898	21096	23601	24164
534	14596	14191	14369	15383	18056	21379	22638	23378
535	13033	13555	14224	14537	17223	19882	22211	23106
536	12975	13118	13618	14782	16901	19601	21191	23075
537	13006	12996	12793	14390	16682	18496	20980	21841
538	12581	13147	12216	13951	16018	18450	20163	21719
539	12175	11939	12778	14346	15325	18331	19757	20771
540	12221	12029	12359	13440	15569	17649	19100	19638
541	11865	12164	12458	12780	15026	18051	18676	19847
542	11312	11733	12092	13070	14504	16935	18143	18790
543	11312	11510	11632	12745	14493	17028	18173	18101
544	11200	11134	11528	12735	14097	15947	17184	18038
545	11419	11112	11457	12273	13739	15271	16753	18089
546	10560	10674	11332	12202	13448	15410	16600	17451
547	10934	11230	11277	11911	13016	14795	16332	17233
548	11156	10854	11714	11703	13303	14682	15535	16463
549	10846	10560	10922	11544	12809	14667	15715	16005
550	10977	10665	11395	11477	12759	13957	15026	16025
551	10763	11412	11543	11474	12511	14113	14570	15686
552	10713	10743	11675	12033	12315	13816	14360	14691
553	11188	11057	10914	11708	12193	13539	14306	14550
554	11208	11436	11595	11954	12710	13121	14102	13748
555	11652	11574	11331	12279	12701	13333	13826	14293
556	11808	11486	11681	12084	13043	12848	13562	13317
557	12456	12047	12001	12140	12753	12899	12882	13588
558	12390	12800	12490	12296	13029	13368	12996	13031
559	13038	12595	12996	12520	12979	12701	12659	13136
560	13173	12765	12788	13331	12974	13654	12744	13094
561	13780	13785	13794	13807	13851	13503	12872	13085
562	14551	13857	13769	13926	13557	12732	12847	12554
563	14842	14612	14516	14515	13847	12924	12284	12539
564	15483	15261	15532	14591	14373	13127	12170	12558
565	15696	15465	15181	15229	14262	12983	13088	12724
566	15836	15942	15974	15648	14848	12853	12548	12956
567	17367	16774	16283	15359	15277	13516	12659	12794
568	17747	17217	16899	16708	15294	13896	12533	12739
569	17559	18494	17338	16977	15718	13758	12776	13114
570	18268	17965	17940	17230	16229	14240	13026	12938
571	18315	18812	17798	17584	15918	14450	13155	12826
572	18730	19258	18601	18089	16603	14406	13021	12417
573	19453	19425	18586	17956	16458	14275	13358	12751
574	19532	19689	18642	17933	17034	14483	12896	12724
575	19424	19460	18798	18175	16694	14276	12646	12400
576	20073	19517	19194	17933	16378	14875	12950	12670
577	19833	19132	19131	17992	16343	14657	13127	12235
578	19343	19503	19608	17890	16781	13838	12681	12653
579	19830	19578	18971	17936	16555	14446	12694	12456
580	20137	19223	18686	19013	16564	13826	12310	11979
581	19418	19165	19474	18344	16229	13680	12161	11887
582	19459	18843	18833	17629	15970	13576	11377	11834
583	18839	18355	18012	17360	15614	13044	11322	11083
584	19053	18355	17663	17128	15567	13373	11257	10750
585	18355	17687	17726	16764	15067	12715	11349	10849
586	17969	17741	17285	16156	14865	12324	10724	10248
587	17315	17172	16376	16374	14279	12506	10414	10336
588	16762	16163	16025	15426	13766	11988	10219	9701
589	16740	15984	15623	15107	13498	11155	10001	9404
590	16070	15164	15560	14453	13067	10894	9577	9496
591	15057	14823	14895	14240	12821	10922	9180	8935
592	14389	13912	13938	13488	11830	9916	9064	9294
593	13983	13912	13762	12594	11830	10045	8529	8199
594	13988	13454	13125	12555	11064	9674	8208	8381
595	12652	13010	12579	12497	11106	8950	7725	7945
596	12357	12742	12054	11127	10861	8625	7625	7244
597	11996	12193	11445	11024	10216	8206	7412	7404
598	11481	11054	10636	10227	9484	7886	6834	6826
599	10920	11122	10359	10546	9060	7688	6549	6267
600	10473	10286	9860	10128	8795	7192	6543	6366
601	10163	9602	9376	9330	8429	6917	5875	6019
602	9377	9360	8915	8166	7632	6436	5708	5325
603	8746	9038	8813	8263	7418	5996	5585	5281
604	8528	8521	8127	7833	7233	5901	5151	4754
605	8165	8082	7938	7192	7187	5831	4873	4770
606	7775	7594	7448	7539	6773	5655	4683	4720
607	7291	7744	7505	6931	6420	5331	4724	4404
608	7616	7357	7128	6765	5983	5188	4447	4347
609	6961	7277	6905	6526	6060	4977	4399	4246
610	6859	7000	6574	6446	5712	4735	4165	3915

## Sheet: App1_Figure_1m
Titrations of SPR(WT)-EGFP-p30-SNAP labeled with BG-TMR-SMX with NADP+ or NAD+
[NADP+] (M)	Ratio (EGFP/TMR)	SD	[NAD+] (M)	Ratio (EGFP/TMR)	SD
0.0001	1.59514	0.0382168	0.001	3.74461	0.0915569
2e-05	1.69534	0.0298403	0.0002	4.44661	0.157734
4e-06	1.7525	0.0316509	4e-05	4.65838	0.0954649
8e-07	2.06115	0.0357201	8e-06	4.72503	0.171677
1.6e-07	2.48522	0.0173504	1.6e-06	4.71508	0.0399506
3.2e-08	3.39714	0.134821	3.2e-07	4.51149	0.15999
6.4e-09	4.25832	0.204739	6.4e-08	4.56008	0.11667
1.28e-09	4.45429	0.0441987	1.28e-08	4.74016	0.0252151

## Sheet: SPR-EGFP-p30-SNAP_NADP
Titration of SPR(WT)-EGFP-p30-SNAP with NADP+
Wavel. (nm)	480	481	482	483	484	485	486	487	488	489	490	491	492	493	494	495	496	497	498	499	500	501	502	503	504	505	506	507	508	509	510	511	512	513	514	515	516	517	518	519	520	521	522	523	524	525	526	527	528
A4	3721	4020	4299	4645	5468	5568	6514	7274	8147	8531	10048	11244	11732	13643	14070	15864	17219	18835	19759	20932	22744	22793	25174	25708	27560	27665	28068	28948	28244	29245	28694	28494	28581	27449	27011	25901	25156	24379	22819	22406	21293	20253	18988	18567	18134	17100	16879	16232	15175
A5	3710	3970	4348	4375	5007	5675	6064	7178	8156	8766	9898	10987	11346	13020	13877	15975	17185	17875	19801	20658	21801	23403	24446	25981	27598	27188	28735	28124	28976	28878	28503	28222	28034	27222	26583	26192	24201	23519	23212	21425	21025	20706	18892	18063	17688	16935	15701	15689	14972
A6	3804	4111	4240	4793	5390	6141	6351	7265	8276	8959	10041	10972	12135	13052	14752	15706	17195	17987	19230	21179	22849	24563	24472	25852	26106	27135	28631	28421	28538	28481	29040	28130	28145	27189	26833	25222	24718	23282	23422	21952	21295	20526	19229	18124	17756	17177	15927	15945	14706
B4	3778	4192	4493	4953	5053	5836	6311	7060	8153	9482	9595	10898	12484	12906	15306	15830	17456	19182	19722	21316	22522	24117	25554	25716	27510	28382	28432	29398	29073	29691	29896	28994	28980	28729	27508	26317	25850	24599	23681	22759	21226	20910	19711	19232	18025	17265	15963	15896	15449
B5	3820	4284	4571	4869	5418	5874	6188	6826	8513	8636	10418	11085	12545	13201	14354	15905	17127	18890	19595	20565	23142	23819	25158	26628	27023	28279	29085	29331	29966	29557	29511	28615	29287	27570	27686	25809	25122	24655	22982	22717	21754	20438	18876	18893	18234	17283	16650	15805	15476
B6	3946	4088	4436	4931	5031	5784	6490	7342	7668	9173	10138	11488	11976	13498	14409	15556	17171	18207	20049	21004	22563	24411	24590	26636	26910	27294	29562	28867	29752	30361	28849	28913	28738	28000	26947	26254	25882	24505	22883	22258	21144	20666	19930	18742	17817	16849	16612	16143	15106
C4	3590	4310	4466	4870	5456	5958	6538	7207	8373	8876	10308	11647	12119	14033	14461	16332	17398	18952	20835	21827	22885	24626	25896	27260	27354	28176	29185	30026	29245	30315	30098	29105	28678	28442	27361	26818	25347	24529	23955	22811	22569	20707	20123	19291	17570	17769	16637	15894	15790
C5	3757	4000	4296	4974	5429	6250	6400	7493	8612	8985	10465	11827	12992	14200	15084	16308	18147	18953	20369	21443	22601	24882	25814	27215	27848	29527	30142	30742	30674	30073	30246	30521	29722	28675	27876	27070	26033	24977	23902	22863	22750	21705	20268	19777	18572	17106	17549	16150	15539
C6	3821	4381	4721	4834	5580	6209	6420	7367	8378	8903	9769	11361	12743	14174	15178	16606	18487	19343	21072	21678	23487	25132	25862	26817	27894	29140	29728	30252	30593	30414	30768	29602	30556	28821	28414	27226	26691	25498	24037	23072	22158	20944	19774	19592	18151	18040	17005	16239	15667
D4	4163	4347	4661	5398	5584	6378	7047	8067	9302	9788	10652	12079	12964	15287	16185	17224	19206	20378	23596	23786	25412	26440	28141	29490	29394	31242	31335	32703	33523	33117	32425	32315	32330	32049	30566	29472	28291	27614	26523	25294	24042	22830	21466	21171	20477	19335	18333	17517	16571
D5	3908	4398	4819	5269	5615	6563	7008	7786	8812	9698	10866	11851	13591	14619	16014	17760	19379	20421	22207	23089	24806	26427	27465	29161	30305	30005	31555	32230	33563	32530	32059	32139	32038	30761	30423	29155	28000	26943	26140	25037	24207	22377	21524	20098	20132	19502	17495	17287	16531
D6	3864	4543	4465	5254	6056	6489	6845	7880	8986	9799	11009	12176	13709	14735	15834	17471	19166	20763	22594	23472	25829	27199	28060	30045	30712	31781	32441	32761	33831	33651	33442	32770	33234	31933	30999	29497	28833	27200	26667	25565	23834	23278	21549	21910	20180	19182	18948	18349	17618
E4	4098	4487	5325	5753	6168	6858	7632	8748	9491	10597	11699	13004	14500	16065	17474	19548	20742	22718	24907	25807	27409	29621	31486	32011	32905	34673	35822	35788	37061	36116	36008	36611	34960	35115	34226	32256	31786	30744	29236	27537	26345	25231	24482	23056	21911	20824	20763	19732	18368
E5	4145	4856	5403	5875	6645	6901	7809	8194	10015	10718	12191	13916	14753	16961	17690	19957	21833	22916	25221	26164	28689	29805	31679	33465	33732	35411	37397	36397	37607	37508	38036	37439	35942	36396	33661	33435	32889	31308	29773	28166	26878	25987	24395	24018	22740	21953	20663	19405	19457
E6	4272	4660	4852	5849	6710	7247	8238	8772	9920	11130	12595	13567	15495	16662	18197	20106	22189	23308	25838	26935	28340	30782	31493	32874	33681	35604	36659	36729	37798	38268	38218	37906	36524	35467	35010	34140	32669	31680	29767	28638	27830	25811	24839	23943	22801	21840	20956	19284	19789
F4	4714	4911	5610	6311	7082	8133	8731	9465	11364	11815	13954	15889	16602	19237	20059	22925	24845	27252	28616	30601	32668	33968	36836	38055	39166	40686	42312	42769	42794	42870	42980	43118	41723	41720	40347	39317	36684	36223	35074	32710	31361	29922	29250	27842	26171	25327	23717	22682	22552
F5	4606	4772	5834	6530	7028	8011	9067	9435	11345	12560	13746	15732	17137	19145	20111	23376	25521	27083	29327	30884	33500	36296	37589	39151	40251	41262	41884	43174	44579	44651	43164	43658	43300	42325	40180	40305	37677	36855	35133	33062	32163	30548	29528	28073	26576	24956	24209	22583	23054
F6	4775	5153	5633	6244	6889	8070	9163	9898	11532	12743	14098	15501	16712	19245	20877	23080	24902	26846	29024	30482	32926	35525	36543	38697	40123	40909	41632	42434	44197	43508	42833	42965	42951	41554	40956	40084	38021	36308	34846	32896	32051	30037	29029	27667	26394	24648	24128	23549	22500
G4	5062	5609	6308	7094	8038	8565	9080	10808	12468	13572	14706	17470	18591	21034	22888	25738	28189	28977	31834	34078	36639	39039	40284	42482	44157	46375	46518	47124	47232	47424	48246	48535	45665	46774	45119	42918	41527	40172	39052	36778	35266	33157	32163	30660	29359	27999	25955	25436	23827
G5	4913	5666	6287	7384	7632	9003	9392	11069	12514	13381	15407	17445	19637	22005	23569	26766	28037	30088	32711	34318	38354	39906	40827	43319	44430	46383	46794	47318	49963	49833	48842	48584	47761	46839	45239	44818	42617	39956	39376	37496	36285	34522	32818	31227	29391	28223	27237	25513	24855
G6	5009	5759	6246	7281	8101	8725	9821	11630	12340	13943	15422	17770	19115	21272	23608	25743	28548	29721	33111	34305	37289	39550	41171	42771	44973	46395	47327	48763	49484	49600	48792	48934	48222	46636	45892	44812	43023	41550	38710	37527	35841	34188	32577	31668	29638	27992	25998	25517	24662
H4	5480	5848	6259	7153	7831	9341	10376	11306	13083	14549	16766	19004	19793	22292	23963	26888	30184	32470	34671	35461	38852	40818	43062	44949	46806	49210	50089	50750	51598	51327	51460	51288	49702	48836	47618	46799	45117	43579	41035	39610	37534	35614	34387	32328	31008	29511	27792	26786	26292
H5	4904	6338	6593	7426	8254	9451	10048	11626	13570	14600	16789	18845	19996	23312	24263	26688	30301	32256	34795	36822	38581	42326	42404	46354	47701	48719	49041	51498	51417	51799	51190	51021	50183	49348	48703	46995	45229	42823	41482	40266	37615	35867	34046	33081	31228	29940	28336	27466	26645
H6	5578	5889	6535	7211	8454	9757	10286	11897	12901	14834	16998	19453	19792	22740	25257	26732	29539	31657	34723	35939	39045	42503	44256	46449	46800	50042	51718	51690	51219	52514	52188	51300	52162	50344	48007	47029	45235	42329	41127	39616	38851	37480	34628	32732	31492	30027	28034	26899	26502
															EGFP int.	TMR int.	Ratio (EGFP/TMR)			[NADP+] (M)	Mean Ratio (EGFP/TMR)	SD
														A4	28244	18165	1.55486			0.0001	1.59514	0.0382168
														A5	28976	17767	1.63089			2e-05	1.69534	0.0298403
														A6	28538	17840	1.59966			4e-06	1.7525	0.0316509
														B4	29073	17504	1.66093			8e-07	2.06115	0.0357201
														B5	29966	17514	1.71097			1.6e-07	2.48522	0.0173504
														B6	29752	17357	1.71412			3.2e-08	3.39714	0.134821
														C4	29245	16945	1.72588			6.4e-09	4.25832	0.204739
														C5	30674	17587	1.74413			1.28e-09	4.45429	0.0441987
														C6	30593	17115	1.7875
														D4	33523	15994	2.09597
														D5	33563	16270	2.06288
														D6	33831	16710	2.0246
														E4	37061	14806	2.50311
														E5	37607	15235	2.46846
														E6	37798	15216	2.4841
														F4	42794	13157	3.25257
														F5	44579	13037	3.41942
														F6	44197	12558	3.51943
														G4	47232	11565	4.08405
														G5	49963	11143	4.4838
														G6	49484	11762	4.20711
														H4	51598	11672	4.42066
														H5	51417	11586	4.43786
														H6	51219	11371	4.50435
[truncated: 82 more columns]

## Sheet: SPR-EGFP-p30-SNAP_NAD
Titration of SPR(WT)-EGFP-p30-SNAP with NAD+
Wavel. (nm)	480	481	482	483	484	485	486	487	488	489	490	491	492	493	494	495	496	497	498	499	500	501	502	503	504	505	506	507	508	509	510	511	512	513	514	515	516	517	518	519	520	521	522	523	524	525	526	527	528
A7	5008	5470	6416	7451	7554	8650	9932	11172	12777	13058	15352	16699	18926	20528	22656	24930	27255	29187	32051	34177	35218	38494	39403	42411	44069	45636	46563	46387	47747	47378	47466	47716	47442	45535	44707	42497	41840	39718	38068	36528	34263	33757	32035	29615	28665	27640	26194	24952	23795
A8	4943	5539	6146	6831	7562	8637	9490	10525	12004	13315	14747	16912	18187	20881	22554	24625	27383	28786	30916	32512	35641	38211	38962	41989	43284	44689	44786	46435	46820	47827	46853	46528	46601	45389	43360	42092	41488	39763	37564	36427	34184	33110	31139	29542	28535	27849	25284	24571	23483
A9	5142	6138	5764	7565	7848	8413	9548	11647	12521	13716	15929	17364	18616	21785	23247	25045	28074	29824	31807	33763	36730	38893	40556	42698	44050	45257	46033	47982	48316	48587	48050	48299	47767	46876	44634	42942	42472	39719	38592	37860	34990	33941	32106	30863	29465	28306	26451	26332	24697
B7	5337	5992	5985	7132	8074	9055	10113	11193	12518	13376	15529	18215	19257	21768	23390	26491	28510	31179	33388	35479	37797	40066	42338	44597	45927	46702	49575	49181	49994	50802	49614	49403	49213	47888	46484	44389	43774	42231	40396	38429	35643	34608	33120	32082	29693	27863	26954	27128	25804
B8	5067	6210	6396	7500	8351	9453	10126	11323	13343	14257	16667	19069	20145	23174	24499	26730	28990	31184	33885	36976	39469	40957	42946	45887	47533	48082	50356	50823	51030	51696	51466	50340	50292	48789	48325	46864	44524	42709	41613	38954	37504	36044	34235	33007	30888	29501	27906	27551	26083
B9	5271	5747	6722	7209	8154	8936	10413	11791	13169	14765	16842	18322	20666	22894	24818	27175	29271	31951	34405	35674	38235	41331	43388	45555	47224	48017	50367	50056	51509	51678	51179	49789	50659	49208	47548	45637	44073	41795	41363	39444	37649	35900	33955	32831	30745	29129	27752	26848	26315
C7	5557	6172	6592	7278	8271	9155	10234	11810	13374	14542	17246	18083	20028	22723	24492	26541	29219	31705	32979	35990	38783	41424	43158	45462	47320	49049	50805	51495	51753	51663	50711	51337	51380	49877	48571	46720	44969	42979	41954	40082	37487	36393	33707	32681	30340	29842	27901	26902	26540
C8	5672	6010	6655	7239	8204	9268	10460	11751	13015	14880	16653	18433	20276	23249	25245	26954	29885	31611	34811	36814	39427	42910	44821	45809	47811	49923	51162	50911	53626	51712	52530	50518	51852	50237	48301	46844	45525	44183	41540	40507	38894	35968	34490	32208	32007	30598	28168	27563	26181
C9	5988	6662	6978	7862	8258	9657	10204	12061	14084	14455	16978	18735	20881	23050	25018	27248	30311	31979	35145	36801	39473	43796	44838	45561	48124	49650	51013	52494	53658	52335	51677	53004	50618	50765	48911	47366	45208	43852	42134	40355	38284	35899	34564	32955	31765	30208	28483	27493	26612
D7	5292	5905	6825	7358	8579	9402	10721	11743	13318	14434	16667	18472	19982	23385	25267	26908	30014	32836	34831	37010	39758	42203	44250	45767	48399	49660	51092	52567	52189	53121	52855	51250	51459	49943	48188	47329	45811	44127	41393	40415	38604	36691	35026	33507	32105	29651	29758	26944	26717
D8	5457	6044	6825	7448	8150	9935	10432	11517	13585	15015	17206	18625	20990	23311	25085	26558	29644	32414	35223	38135	40338	42998	44600	47245	48359	50349	51887	52322	52377	53610	53988	52217	52898	49907	49481	47861	45644	44576	42424	40277	38934	36465	34872	32795	31429	30302	28859	27751	26628
D9	5268	6141	6311	7489	7963	9255	9859	11903	13692	14427	17032	18856	20388	22724	24960	27555	30348	32007	34939	36637	38956	41536	44263	46782	47663	49402	50251	51587	52451	52859	51948	52506	50774	50402	48905	46542	44832	42985	41713	39599	38734	36057	33719	34047	30881	30427	28730	27785	26428
E7	5378	6024	6532	7727	8015	9239	9990	11045	12422	14300	16074	18551	19694	22054	24415	26861	29058	30966	33633	35912	38468	41278	42551	45456	47112	48374	49378	50357	50958	51591	51095	50098	49973	49571	47272	46340	44995	42495	41296	38166	36992	35411	34070	32677	30653	29817	28209	27025	26548
E8	5038	5939	6220	7640	8287	8991	9535	11084	12794	14410	16416	18561	19847	22103	24773	26581	29017	31285	33689	36100	39463	41186	43304	44997	46918	48888	49703	50162	51164	52505	52073	50797	50034	49393	47685	47402	44258	43115	40676	39066	38738	36275	33742	31909	30620	29540	28368	26554	26158
E9	5306	6175	6669	7278	7930	8818	9670	11516	13285	14101	15873	18648	20036	22158	23928	26784	29193	31053	34111	37393	38488	41990	42132	45146	47101	48937	49022	50002	50757	51304	51007	51289	50164	48262	47671	46815	45340	42911	40309	39309	37746	35434	34120	32807	31417	29622	28241	26760	25397
F7	5109	5435	6258	7061	7685	9216	9938	11600	12961	14718	15696	18695	19818	22721	23970	26969	28884	31189	35087	36092	39062	41471	43539	45076	47078	48923	49619	50834	51336	51447	50573	50097	50476	48903	48109	45934	45522	42827	40925	38988	37808	36454	33761	32313	31178	30560	28007	27254	26122
F8	5024	5561	6246	7164	7962	9077	9719	11505	12916	13860	16067	18067	19180	22331	24204	26457	28991	31699	33328	35736	38253	41031	42850	44780	45610	47716	49420	49387	50987	51783	51097	50359	50207	48817	47032	46365	43837	42231	40672	38162	36716	35721	33198	31390	30492	29061	28180	26737	25346
F9	4849	5914	6396	6963	7597	9262	9846	11526	13413	14658	16199	18064	19900	22163	24572	27111	29340	30579	34246	35894	38623	41198	42634	45100	46654	48716	48899	50816	51002	51745	49419	50303	50228	48907	47048	46392	44753	43237	40775	39511	36963	35193	33547	31951	31053	30001	27649	26802	25428
G7	5200	5912	6166	7737	7510	8936	10225	11054	13177	14160	15762	18507	19530	22287	23645	26529	29278	30993	33774	36455	38604	40361	42021	44699	45978	47652	49337	51018	50599	50617	50575	51203	49831	48488	47963	45283	44227	41816	39598	39314	38605	36807	34900	32713	31775	29629	28827	27491	26620
G8	4806	5443	6423	6826	7833	9105	9793	11457	13273	14273	15970	18143	19822	22147	23978	26139	28831	31150	33781	35095	38926	41076	41632	44582	46886	48205	49631	50473	50441	51772	51138	52193	49925	49467	48662	47062	45908	42672	41585	39861	38374	36080	34516	32728	30991	29565	28570	26411	26591
G9	5077	6050	6470	6705	7736	9158	9799	10921	12967	14357	15892	17868	19930	22779	23802	27114	29308	31225	33468	36256	38560	40608	42499	44896	46544	46874	49024	49671	50857	49892	50432	50115	49253	48771	46992	45873	43978	42255	41673	38747	37147	35638	32275	32225	30370	28913	27101	26540	26206
H7	5159	5819	6442	7397	8151	9229	10496	10872	13214	14424	16164	18656	20419	22334	23901	26368	29171	31931	34338	36980	38772	42100	43034	46608	47622	47309	49755	52123	52577	51954	51912	50642	51190	49924	48156	46812	44878	43290	41018	39063	37993	36576	34804	33327	31101	29532	27745	26355	26778
H8	5677	5885	6381	7099	8210	9491	10186	11324	12952	15229	16042	19033	20756	22552	24441	27277	29564	31862	35485	36598	39759	42549	44044	45714	47329	48923	49457	51310	53244	52384	52774	51713	51224	50045	47498	46636	44907	43010	41906	40399	38531	36010	33987	33242	31236	29830	28373	27823	26242
H9	5212	6216	6528	7051	8161	9115	10317	11552	13391	14624	16517	18837	20085	22348	25066	27188	29925	31759	34266	37476	39554	41944	43949	47417	47921	49473	51373	50665	52784	52542	52739	51323	50760	50133	49310	47660	45677	43585	41849	40663	38806	36893	34604	32906	31139	29996	28568	27271	25849
															EGFP int.	TMR int.	Ratio (EGFP/TMR)			[NAD+] (M)	Mean Ratio (EGFP/TMR)	SD
														A7	47747	12934	3.69159			0.001	3.74461	0.0915569
														A8	46820	12160	3.85033			0.0002	4.44661	0.157734
														A9	48316	13087	3.69191			4e-05	4.65838	0.0954649
														B7	49994	11125	4.49384			8e-06	4.72503	0.171677
														B8	51030	11949	4.27065			1.6e-06	4.71508	0.0399506
														B9	51509	11258	4.57532			3.2e-07	4.51149	0.15999
														C7	51753	11210	4.61668			6.4e-08	4.56008	0.11667
														C8	53626	11248	4.7676			1.28e-08	4.74016	0.0252151
														C9	53658	11688	4.59086
														D7	52189	11324	4.60871
														D8	52377	11278	4.64417
														D9	52451	10656	4.9222
														E7	50958	10703	4.7611
														E8	51164	10911	4.68921
														E9	50757	10811	4.69494
														F7	51336	11618	4.41866
														F8	50987	10857	4.69623
														F9	51002	11540	4.41958
														G7	50599	10905	4.63998
														G8	50441	10932	4.61407
														G9	50857	11490	4.4262
														H7	52577	11093	4.73966
														H8	53244	11292	4.7152
														H9	52784	11076	4.76562
[truncated: 82 more columns]

## Sheet: App1_Figure_1n
Titrations of SPR(D41W42)-EGFP-p30-SNAP labeled with BG-TMR-SMX with NADP+ or NAD+
[NADP+] (M)	Ratio (EGFP/TMR)	SD	[NAD+] (M)	Ratio (EGFP/TMR)	SD
0.01	4.70944	0.0350561	0.01	1.69995	0.0320802
0.002	5.08284	0.0802092	0.002	1.9641	0.0405013
0.0004	5.24098	0.142529	0.0004	2.59312	0.017598
8e-05	5.22687	0.0732298	8e-05	3.57602	0.219407
1.6e-05	5.1102	0.0224905	1.6e-05	4.51039	0.0345732
3.2e-06	5.14971	0.0931167	3.2e-06	4.97078	0.235062
6.4e-07	5.44265	0.127033	6.4e-07	5.16649	0.103263
1.28e-07	5.27495	0.0947529	1.28e-07	5.27604	0.178559

## Sheet: SPRD41W42-EGFP-p30-SNAP_NADP
Titration of SPR(D41W42)-EGFP-p30-SNAP with NADP+
Wavel. (nm)	480	481	482	483	484	485	486	487	488	489	490	491	492	493	494	495	496	497	498	499	500	501	502	503	504	505	506	507	508	509	510	511	512	513	514	515	516	517	518	519	520	521	522	523	524	525	526	527	528
A7	4474	5177	5690	5906	6947	7738	8529	9512	10438	11911	13327	14190	16230	17287	19614	21108	22718	25017	26712	28490	30633	32029	33501	34295	36723	36709	38432	38821	39317	38767	39285	39470	37517	36756	35337	34658	33426	33018	30252	29401	27610	26115	25453	23635	22903	21839	21262	20231	19396
A8	4357	5235	5416	6323	6609	7674	8326	9258	10171	11797	12809	14528	16268	17788	19658	20654	22851	24698	26286	27899	29607	31487	33429	34595	36107	37051	37597	37984	38856	38260	38440	38119	37863	36804	35912	34163	33071	32104	29610	28985	27978	26302	25619	23845	23445	21442	20936	20146	19632
A9	4768	5170	5501	6156	7331	7562	8518	9426	10615	11742	13680	14401	16332	17679	19029	20399	23277	24689	26099	28669	29894	32279	33275	34664	36160	38227	38024	39100	38870	39185	38840	38216	38108	37127	35256	34424	33576	32690	31405	29344	27409	26885	25320	24093	23410	21987	20918	20270	19825
B7	5318	5697	6659	7119	8197	9087	10427	12281	13508	14575	16678	18084	20490	22120	24597	25689	28815	31381	33526	35739	38723	40166	43285	44476	45592	48014	49684	50127	49513	49474	50386	49512	48198	47635	45263	43611	42045	40957	38264	37914	35322	33346	32892	30827	28996	27914	26639	24912	24664
B8	5218	5952	6790	7434	8266	9288	10523	11385	12734	14219	16135	17510	20963	22383	24924	25927	28531	30986	33211	36534	37859	41015	42640	43446	46176	47105	48719	49146	48775	49311	49296	47057	47311	46157	45920	43179	41306	40368	38120	36399	35129	33574	32326	29984	29310	27696	26378	25695	24258
B9	5513	5858	6594	7640	8278	9413	10594	12159	13021	14707	16949	18835	20477	22379	24286	26244	29213	31891	34224	37612	39203	40598	43742	44699	47164	48362	48378	50773	50202	50272	50251	48822	48232	47756	46806	44249	42793	41684	39335	37984	35761	34237	32318	31091	30011	27964	27226	25788	25210
C7	5418	6127	6740	7272	8005	9005	9936	11793	13515	14388	16649	18626	20548	21500	23944	26285	28661	31376	33713	36552	38933	40686	43739	44537	46127	47808	49327	50194	49660	50013	49834	49280	48411	47435	46225	44577	42605	40949	38945	37447	35739	33286	32510	31416	29352	27430	26153	25954	24611
C8	5599	6189	6803	7273	8300	9223	10407	11902	13550	15145	16926	18313	20922	22592	25575	26761	29086	32994	34099	37083	39934	42010	44499	45958	46920	48848	49514	50788	50688	51462	51146	51016	49243	48175	46782	45355	43191	41758	40404	37763	35403	34720	33004	30614	29484	27657	27620	25461	24551
C9	4619	4923	5832	6478	6643	7843	8860	10600	10917	12553	14444	15771	17665	18507	20969	22703	24848	27486	28949	31035	33501	35571	36914	38070	39024	40929	41150	42353	42939	43090	42398	42049	41949	40570	39628	38050	36221	35377	34326	32781	30037	28459	27465	26930	25266	24086	22710	22026	21343
D7	5677	5755	6836	7389	8035	8923	10387	12163	13416	15013	16792	18998	21112	22991	24857	26240	29079	32508	34797	37455	39306	41640	44278	45512	47539	48660	49383	50384	50990	51421	50396	50281	49799	48539	46565	44928	43851	42433	39437	38757	36535	34322	32258	31762	30101	28449	27036	26218	24823
D8	5724	5901	6397	7136	8126	9158	10051	11469	13234	14694	17073	18148	20115	21963	24301	26586	28859	31514	33841	36206	38985	40855	43488	44877	46269	48691	49342	48841	49556	49913	49361	49614	48294	47192	45726	43771	42950	41391	39652	36631	35679	33234	32576	30135	29478	27792	26648	25946	24391
D9	5560	5632	6868	7466	8255	9161	10492	11989	13148	14919	17363	18552	21333	22642	25309	27304	29048	32138	34230	36721	39383	41723	43979	45306	47188	47844	49614	51598	52264	50914	51167	49728	49900	48988	47822	45418	44143	42518	40492	38528	36270	33985	32654	31668	29863	28069	26944	26264	25084
E7	5457	6033	6426	6746	8403	8945	10372	11748	13189	15133	17158	18231	21105	23007	25305	27266	29254	32425	33502	37106	39571	41987	43635	44886	47145	48213	49704	50983	51233	51186	50571	50591	48949	48432	46603	45301	42668	42132	39274	38077	36774	33770	33059	31137	29819	28818	26970	26709	25417
E8	5481	5894	6838	7656	8427	9519	10761	12446	13661	15411	17444	18901	21645	23513	25255	27456	30479	33382	35511	38360	40486	43516	45356	47435	49888	50901	51674	52462	51796	52437	52691	51332	50861	49948	48883	47066	45177	43415	40952	39318	37736	35324	34004	31397	31250	28850	28142	27424	25290
E9	5503	6142	6983	7520	8838	9265	11295	11744	13413	15650	17320	18807	21115	22539	25386	26602	30217	33041	35285	38266	40009	42354	44613	46289	47425	50198	49918	52307	52041	52586	52664	51445	50560	48822	48144	46658	44436	43129	41007	39162	36739	34398	33700	31708	30448	28466	27817	26552	25404
F7	5376	5926	6375	7247	8249	9277	10603	12502	12496	14845	17344	18436	20956	23637	24922	26887	29851	32130	34228	37470	40034	41805	44175	45202	46731	48668	49431	51218	50646	51759	51420	50045	50158	47841	46075	45569	43229	41714	40115	39028	36449	34366	33357	31198	30403	28621	27138	26662	25255
F8	5450	6080	6186	7229	8164	8931	10369	11491	12688	14416	16870	17563	20283	22484	24252	26415	28662	31320	33106	35851	38189	40397	42010	44114	46067	47004	48118	49541	50191	50143	49478	49424	47225	47127	46416	43779	42812	40737	38532	37204	34795	33407	32639	30108	28896	27785	26517	25226	24968
F9	5437	5612	6661	7259	8325	8538	9945	11302	12322	14655	16332	17660	20120	21234	23843	25493	27333	31280	32366	34727	37881	38766	41804	44029	44226	46686	47087	47610	47831	48202	48496	47576	47569	45591	44099	42754	40786	39742	37978	35924	34726	32561	31001	29841	28285	27326	25872	24349	23581
G7	5292	6038	6749	7114	8164	9045	10410	11892	13994	15411	16737	18120	20457	22783	25790	26530	29345	31997	33661	36994	39286	41224	43848	45140	46499	48733	49428	50186	51267	51013	50999	48994	48891	48633	47119	43892	43494	41851	39461	37681	35742	33239	32826	30906	29643	28561	27711	26131	24917
G8	5175	6077	6548	7081	8073	9185	10517	11979	13260	14320	16866	18035	20689	21758	23595	25800	28632	30928	32563	35492	38071	40026	42195	43635	46127	47499	47797	49116	49494	50124	48618	48957	47883	46683	44749	43499	42140	40292	38576	37102	34321	33107	32398	29959	28942	27157	26325	24727	24136
G9	5465	5546	6817	7112	8252	9027	10375	12150	12896	14678	16511	18084	20501	22141	24973	25650	29364	31917	34322	35948	39142	41014	42831	45230	46605	48996	48567	49687	50513	50147	50406	49305	48432	47613	44664	43915	42098	41217	39449	37189	36030	33691	32033	30856	30037	28555	26741	26052	25123
H7	5282	6152	6760	7245	8462	9775	10374	12050	13234	15023	16817	18118	20929	22309	25149	26864	28427	32580	34507	36475	38789	41339	43439	45129	46867	48327	49668	50038	50835	50315	51126	49551	49219	47880	46025	44424	43041	40788	39493	37527	35274	34550	32126	30902	29487	27989	26218	25597	24832
H8	5223	5995	6818	7002	8652	9049	10990	12330	13775	14660	17479	18622	21321	22932	25067	26841	28897	31434	34061	37543	39277	41096	44110	44942	47219	48805	49321	49623	51019	49550	49652	49335	47749	47774	45537	44673	42218	41416	39911	37253	35876	33477	31767	30865	29513	27849	27107	26641	24964
H9	5732	5950	6728	7664	8618	9201	10183	12206	12929	14995	16885	18421	20711	21876	24898	27052	29441	31858	33511	36244	39075	41498	43439	44451	47002	48330	49614	49308	50182	51063	50823	49622	48884	46958	46401	44603	43143	41370	40036	38045	36354	34012	32895	30830	29707	27429	27239	25653	24433
															EGFP int.	TMR int.	Ratio (EGFP/TMR)			[NADP+] (M)	Mean Ratio (EGFP/TMR)	SD
														A7	39317	8281	4.74786			0.01	4.70944	0.0350561
														A8	38856	8265	4.70127			0.002	5.08284	0.0802092
														A9	38870	8307	4.67919			0.0004	5.24098	0.142529
														B7	49513	9876	5.01347			8e-05	5.22687	0.0732298
														B8	48775	9631	5.06438			1.6e-05	5.1102	0.0224905
														B9	50202	9709	5.17067			3.2e-06	5.14971	0.0931167
														C7	49660	9609	5.16807			6.4e-07	5.44265	0.127033
														C8	50688	9843	5.14965			1.28e-07	5.27495	0.0947529
														C9	42939	7944	5.40521
														D7	50990	9819	5.19299
														D8	49556	9331	5.3109
														D9	52264	10096	5.1767
														E7	51233	10074	5.08567
														E8	51796	10097	5.12984
														E9	52041	10174	5.1151
														F7	50646	9886	5.123
														F8	50191	9894	5.07287
														F9	47831	9105	5.25327
														G7	51267	9292	5.51733
														G8	49494	8975	5.51465
														G9	50513	9538	5.29597
														H7	50835	9818	5.17773
														H8	51019	9506	5.36703
														H9	50182	9504	5.28009
[truncated: 82 more columns]

## Sheet: SPRD41W42-EGFP-p30-SNAP_NAD
Titration of SPR(D41W42)-EGFP-p30-SNAP with NAD+
Wavel. (nm)	480	481	482	483	484	485	486	487	488	489	490	491	492	493	494	495	496	497	498	499	500	501	502	503	504	505	506	507	508	509	510	511	512	513	514	515	516	517	518	519	520	521	522	523	524	525	526	527	528
A10	3765	4192	4409	4872	4962	5920	6048	7333	7570	8627	8995	10015	11069	12411	13164	14312	15489	17228	18133	19291	20242	21112	22027	23360	23889	24615	24209	25393	25257	25410	25273	24858	25264	24377	23106	22487	21136	21364	19622	19185	18555	17661	17356	16053	15098	14518	14075	13752	13166
A11	3769	4134	4465	5213	5281	5834	5918	7081	7814	8396	9415	9928	11496	11752	13428	13950	15424	16777	17684	19116	20262	21359	22546	23173	24264	23949	25330	24980	25444	25459	24524	24828	24339	24595	22771	22739	21665	20706	19824	19254	18084	17528	16859	16360	15771	14826	14171	13568	13225
A12	3654	4093	4620	4813	5088	5883	6175	7360	7547	8773	9640	9985	11506	12119	13653	14163	15877	16932	17723	19478	20501	21464	22170	23426	23511	24915	24464	25936	26059	25889	25040	25103	25099	24685	23818	22880	22288	21233	19962	19708	18816	17258	16994	15896	16083	14661	14535	13705	13438
B10	4154	4407	4992	5312	6029	6628	7370	8282	9206	10266	11477	12234	13454	14782	16337	17479	18942	20558	22375	24112	25276	26700	28120	28732	29679	31661	31453	31227	31557	31993	32338	32680	30918	30472	29678	29033	26777	25902	24759	23440	22683	21601	20826	19921	19759	18046	17137	16845	16040
B11	3741	4298	4984	4987	5712	6389	6900	8053	8854	9767	11146	11710	13411	14350	15896	16705	18374	19870	21240	22668	24530	25309	26998	27336	28648	28862	30347	30297	31459	30770	31127	30780	29195	28784	27837	27430	25552	26089	23745	23649	21968	21385	19743	19339	18192	17311	16951	16896	15785
B12	3813	4584	4621	5050	5823	6471	6633	7802	9084	9670	11113	11448	13319	14314	16089	17023	18999	20623	21317	23315	24920	25471	26839	27838	28551	29612	30118	31016	30781	31148	30809	31449	29578	29956	28181	27743	26120	25355	23601	22566	21967	21050	20540	19320	18291	18186	16264	16109	15562
C10	3916	3894	4379	4856	5783	6228	6728	7903	8484	9668	10665	11590	13474	14301	16070	16657	18348	20920	21510	22882	24685	26731	27740	28784	29193	30865	30333	31227	32268	31769	31546	30853	30219	30097	29864	27906	26809	26496	25474	23983	23012	21530	20596	19375	18760	18393	17224	16186	15860
C11	4132	4678	5179	5765	6163	6864	7493	9074	10080	10983	12410	13549	15405	16622	18299	19518	21410	22933	23823	25974	27145	28648	30231	31593	33235	34306	34892	35081	35632	35236	35916	35415	34137	33494	32506	30811	29931	28906	27914	26124	25089	24199	23534	21663	20533	19987	19449	19032	18071
C12	3966	4685	5458	5783	6162	6871	7877	9109	9696	10892	12455	13958	14978	16322	17896	19541	21661	22924	24505	25754	27400	29017	31274	31528	33762	34606	35675	35878	36463	36111	35631	34442	33953	33691	32857	32321	31085	29300	27999	27091	25363	23864	23130	21813	20939	19633	19858	18432	18070
D10	4564	4911	5691	6148	6969	7984	8648	10012	11170	12408	13903	15192	17867	18424	20176	22579	24949	26451	27965	29881	31402	34351	35784	37432	38214	39335	40165	42086	41245	41991	41723	40943	41058	39211	38162	36342	35986	33324	32891	31307	29335	28419	27058	25622	24356	22904	22644	21725	21118
D11	4513	5088	5446	5731	7072	7609	8820	9917	10892	12515	14268	15601	17758	18250	20481	22233	24094	26065	28513	29978	32287	35009	36075	38033	38876	40400	40836	41310	42586	42084	41942	40913	41156	40072	38979	37240	35981	34281	32817	31004	30021	27698	27195	25441	25177	23274	23045	21568	20715
D12	4557	5081	5333	6435	6713	7498	9137	10135	11012	12471	14451	15121	16875	18108	20246	22122	24215	25995	27805	30614	32660	33663	35729	37077	38767	39809	40788	41740	41481	42237	41861	41346	40749	39665	39071	37353	35290	34554	32702	31574	29879	27535	27152	25452	24197	23315	22675	21843	21032
E10	4964	5553	6361	6607	7712	8887	9915	11262	11867	14338	15942	17614	19635	21142	23142	24669	27469	29360	31403	33901	36153	37901	40326	42065	44278	45792	45285	47366	47627	46915	45663	47065	45654	44340	42866	41581	39390	38400	37016	34836	33455	31258	30086	28817	27162	25913	25217	24394	22696
E11	5173	5467	6579	6979	8294	8635	10351	11605	12664	14664	16247	17255	20162	21247	24496	25309	27647	30602	32639	34467	37346	39257	42136	42801	44747	46956	47682	48383	49366	49232	48959	48147	47396	47238	45285	43340	41361	39858	37854	37495	33455	33249	31125	29568	29276	26855	25158	25488	24184
E12	5241	5625	6487	6867	7895	8987	10271	11577	12675	14218	15588	17150	19748	21922	23696	25620	28120	30799	32208	35092	37256	39982	41320	42810	45334	46337	47150	47759	47959	48421	47587	47200	47318	46595	43653	42469	41334	40136	36996	35566	33753	32422	31427	29467	28463	27128	25943	25110	23896
F10	5541	5901	6544	7477	8311	9558	10724	12187	13376	15263	16716	18672	20188	22579	25392	27070	29850	32578	34949	37450	39678	42200	44205	45500	47954	49311	49541	50928	50660	51747	51125	51446	48714	48702	46504	45261	43852	41354	40224	39001	36167	34424	33078	30988	29473	27811	27813	26799	25442
F11	5611	6129	6549	6922	8444	9153	10278	11906	12884	15049	17220	18256	20649	22099	24808	26239	29024	32271	33285	36331	39683	41582	43986	45511	47920	48681	49359	49251	50693	50849	50304	49721	48480	47641	46553	44836	42621	41154	38982	37066	35948	34154	32454	30990	29753	27965	27091	26129	24896
F12	5294	5629	6714	7279	8299	9168	10632	11649	13176	14935	16315	18582	21120	21541	24924	25729	29002	31404	33690	35548	38492	39565	42536	44961	45685	48125	49045	49553	50110	50614	49184	49005	47927	47364	45332	45032	42757	41741	40480	37939	35622	33233	32308	29856	29764	27646	26563	26014	24364
G10	5772	5854	6658	7041	8550	9249	10062	11433	12729	14787	16933	17670	20657	22161	24885	26810	28914	32035	33850	36806	38537	40759	43122	43765	46350	47541	49041	49714	51542	50026	50674	49881	48254	47216	46460	43890	42937	41143	39851	36948	35709	33424	32424	30897	29168	28896	26723	25607	24665
G11	5551	5800	6754	7474	8281	9155	10482	12104	13004	14910	16660	18163	20890	22655	24858	26742	29615	32030	33640	37255	38972	40455	42574	44433	46829	48296	48514	50920	50492	51071	50077	49757	48951	47554	46420	44521	42666	41926	39172	38294	35765	34254	32797	31163	29836	27721	26706	25934	25164
G12	5369	5707	6721	6943	8194	9238	10290	11265	12713	14360	16760	17710	20164	22449	25019	26449	28082	31266	33365	36256	39243	40503	41916	44120	45625	47337	48137	49468	50307	49424	49511	49260	47360	47286	44728	44387	41224	40833	38770	36702	34147	32708	31599	30248	28230	27770	26161	25407	24393
H10	5140	6001	6237	7074	8684	9684	10511	12129	12961	15498	17069	18254	20649	23239	25189	26396	30275	31857	34335	36575	40043	41998	43172	45095	47752	48555	49024	51311	50785	50241	51227	50861	49512	48771	47287	44679	43122	42261	40138	38235	36189	34205	33133	31863	29908	28575	26815	25976	24605
H11	5490	5729	7151	7120	8250	8748	10496	12264	14163	15067	16924	18528	20842	22152	25232	26204	29932	31408	34112	36633	38621	41790	43412	45540	46289	48578	48035	50040	50713	50691	50528	49913	48523	47173	46471	44210	43083	40601	39728	37359	36422	33456	33128	30436	30259	28028	27074	26107	24676
H12	5167	6122	6482	7004	8043	9156	10266	11638	12860	14486	17043	17940	20502	21652	24594	25194	28412	30833	33706	34963	37587	39344	42922	44047	46596	47264	47735	48233	50031	49690	48474	48086	47767	47649	44952	43095	42105	40201	38341	35324	34582	32497	32113	29878	29711	27870	26481	25813	24746
															EGFP int.	TMR int.	Ratio (EGFP/TMR)			[NAD+] (M)	Mean Ratio (EGFP/TMR)	SD
														A10	25257	15093	1.67342			0.01	1.69995	0.0320802
														A11	25444	14660	1.73561			0.002	1.9641	0.0405013
														A12	26059	15412	1.69083			0.0004	2.59312	0.017598
														B10	31557	16399	1.92432			8e-05	3.57602	0.219407
														B11	31459	15688	2.00529			1.6e-05	4.51039	0.0345732
														B12	30781	15683	1.9627			3.2e-06	4.97078	0.235062
														C10	32268	12521	2.57711			6.4e-07	5.16649	0.103263
														C11	35632	13756	2.59029			1.28e-07	5.27604	0.178559
														C12	36463	13960	2.61196
														D10	41245	12319	3.34808
														D11	42586	11249	3.78576
														D12	41481	11541	3.59423
														E10	47627	10502	4.53504
														E11	49366	10909	4.52525
														E12	47959	10727	4.47087
														F10	50660	10485	4.83166
														F11	50693	10477	4.8385
														F12	50110	9559	5.24218
														G10	51542	10201	5.05264
														G11	50492	9610	5.25411
														G12	50307	9688	5.19271
														H10	50785	9955	5.10146
														H11	50713	9626	5.26834
														H12	50031	9166	5.45832
[truncated: 82 more columns]
