# Supplementary material for: Semisynthetic biosensors for mapping cellular concentrations of nicotinamide adenine dinucleotides
Source: eLife. 2018 May 29;7:e32638. doi: 10.7554/eLife.32638 (PMC5990361; doi:10.7554/eLife.32638)
Supplement: Appendix 1—figure 1—source data 10. [file elife-32638-app1-fig1-data10.xlsx]

## Sheet: App1_Figure_1p
Titration of NADP-Snifit with H2O2 and a fixed concentration of NADP+ (100 uM)
[H2O2] (M)	Ratio (TMR/SiR)	SD
0.001	0.582074	0.0138072
0.0002	0.574955	0.0095843
4e-05	0.556683	0.00996675
8e-06	0.555749	0.0109466
1.6e-06	0.538512	0.0121122
3.2e-07	0.559052	0.0104807
6.4e-08	0.537023	0.0101108
1.28e-08	0.54157	0.00196961

## Sheet: H2O2_titration
Titration of NADP-Snifit with H2O2 and a fixed concentration of NADP+ (100 uM)
Wavel. (nm)	540	541	542	543	544	545	546	547	548	549	550	551	552	553	554	555	556	557	558	559	560	561	562	563	564	565	566	567	568	569	570	571	572	573	574	575	576	577	578	579	580	581	582	583	584	585	586	587	588
A1	2147	2182	2028	2122	2257	2468	2780	3090	3241	3417	4086	4646	4682	5260	5509	6169	7076	7381	7740	8813	9120	9950	11260	11331	12251	13326	13748	13857	14631	15766	15889	16624	16971	18002	17123	18101	18124	17952	18186	18590	18150	17755	17911	17391	16980	16308	16237	15209	15380
A2	2571	2251	2237	2355	2339	2687	2870	3515	3558	4004	4475	4810	5041	5542	6306	7095	7590	8652	8701	9210	9790	10524	11917	12485	13469	13715	14992	15432	16108	16448	17705	17119	18195	18796	18869	19270	19650	19908	19383	18891	18766	19535	18608	17508	18080	17288	16822	17188	16891
A3	2707	2119	2536	2236	2406	2740	2958	3153	3630	3657	4361	4971	5005	5616	6314	7199	7127	8700	8494	9103	10346	10699	11200	12481	12954	14306	14941	14735	15626	17099	17469	17844	18235	18790	18990	18492	20019	19177	19278	19764	19136	18694	18326	18309	17694	17671	17861	17188	16002
B1	2788	2446	2233	2477	2674	2750	3262	3503	3899	4635	4469	5122	5679	6255	6731	7152	7897	8369	9815	9943	11212	11717	12662	13672	14298	15209	16725	16282	17780	18192	19092	19202	19645	19396	20533	20803	21436	21410	21273	20449	20839	21144	20120	20795	19961	19784	19197	18401	18148
B2	2814	2584	2417	2661	2585	2967	3405	3323	3654	4563	4517	5748	5547	5823	6722	7514	8236	8465	9718	10462	11235	11894	13218	13585	14729	15825	16171	16723	17108	17801	19699	19242	20208	20217	21333	20949	21757	21337	22222	21787	21636	22044	20275	21142	19961	19556	19615	18317	18757
B3	2677	2417	2844	2416	2916	2890	3401	3530	3782	4420	4559	5155	6287	6060	7098	7571	8402	9169	9466	10564	11497	12277	12996	13953	14811	16114	16521	16943	18285	18872	19164	19783	20345	20999	21188	21631	21613	22420	21814	21232	21630	21512	21176	19675	21004	20400	19244	19108	18011
C1	2874	2263	2551	2915	2862	3016	3338	3515	3958	4297	4564	5157	5703	5916	6841	6897	7982	8978	9078	10323	11500	11464	12323	13197	14003	15557	16086	16569	17449	18125	18692	18517	19525	20058	20743	21290	22025	21724	21771	20770	20874	21203	20604	20490	19935	19247	19089	18570	17875
C2	2957	2502	2357	2520	2772	3051	3023	3264	3994	4292	4745	5027	5510	6344	6598	6848	8408	8484	9413	10217	11203	11694	12161	12995	14601	14759	15531	16377	17238	17606	18213	18993	19792	19765	21063	20578	20128	21310	21249	20519	20649	19943	19446	19762	19827	19571	18433	17995	17619
C3	2811	2534	2199	2616	2986	2896	3204	3478	3866	4650	4759	4999	6173	6635	7207	7665	8190	9207	10086	10000	11653	12072	13079	14215	14672	15920	16380	17170	17488	18556	19383	20258	21043	20339	21720	21891	21990	21694	21318	21988	20969	21564	20735	21484	20159	20182	19701	18126	18392
D1	2507	2535	2430	2559	2545	2975	3267	3434	3506	4310	4860	4977	5594	6121	6683	7395	7740	8976	9939	10383	11453	12002	12544	13648	14426	14931	16555	16721	17775	18802	19256	19001	19806	20670	20933	20909	21160	21782	21055	20270	21409	20632	20721	19722	19548	19362	18003	18988	17849
D2	2834	2392	2217	2508	2688	2818	3323	3546	3454	4130	4624	4808	5451	6185	6618	7324	7975	9000	9202	10175	10900	11859	12700	13930	14187	15220	15609	16735	17777	18307	18308	19596	19678	20150	20448	20143	21260	21717	21154	22181	21374	20728	20561	20675	19865	19273	18662	18310	17136
D3	2646	2412	2325	2723	2764	2978	3436	3392	4157	4332	5011	5077	5400	6040	6844	7435	8230	8748	9287	9967	10954	12025	12571	13686	13887	15490	16050	16304	17193	17869	18532	19096	20502	20147	20353	21191	21395	20936	21528	21805	21013	21669	20539	20278	20072	18987	19730	19257	17929
E1	2711	2509	2451	2555	2619	3085	3288	3392	3817	4611	4837	5484	5687	6045	6759	6931	8180	8588	9333	10274	11878	11898	12814	13521	14717	16386	16433	17057	18024	18517	18774	19482	19786	20594	20750	20715	21466	20965	21331	21245	21430	21029	20528	19610	19983	20141	19138	19550	17735
E2	2606	2691	2567	2617	2528	2695	3250	3511	3690	4363	4436	4825	5962	6026	6269	7428	7859	8356	9113	10142	11139	11690	12439	13599	14483	15690	15465	16562	16041	18290	19393	19234	19967	19908	20394	21083	21629	20541	21062	20478	21390	20980	20647	20131	20034	19492	19307	18372	17881
E3	2560	2566	2363	2622	2810	2899	3331	3637	3460	4306	4623	5193	5854	6034	7104	7111	8382	9087	9780	10518	11178	11035	12814	13918	13939	14780	16561	17640	17268	18554	18981	19499	19963	20768	20861	21603	21475	21053	20947	21497	20629	21265	21399	21013	20164	19958	18993	19006	17907
F1	2820	2466	2565	2581	2744	2952	3291	3659	3820	3866	4473	5116	5965	5900	6529	7209	7988	9077	9479	10237	10773	11897	13146	13981	14234	15750	16155	16919	17191	17739	19808	19866	19710	20474	20631	20639	21631	22179	21739	21554	20997	20222	20891	19644	20253	18845	19167	19412	18766
F2	2518	2229	2436	2818	2862	2994	3329	3358	3756	4248	4273	5160	5635	6224	6558	7052	8247	8871	8897	9841	11321	11755	12666	13972	13729	15516	16352	16875	17311	19009	18879	19418	19635	20081	21058	20198	20759	21382	21318	21418	21136	20872	21208	20001	20234	19540	18996	18240	18085
F3	2473	2389	2560	2481	2728	2979	2901	3438	3778	4471	4179	4748	5526	6330	6680	7041	7758	8440	9040	10311	11015	11281	13407	13743	13787	14698	15701	16654	17168	18175	18674	18957	19629	19831	20461	20051	20632	20595	21417	20325	20201	20659	20866	19810	20044	19621	18512	18192	17897
G1	2270	2361	2305	2730	2738	2708	3163	3410	3898	4344	4647	4965	5579	5766	6110	7031	8072	8350	9522	10744	11350	11886	12350	13575	13997	15440	16113	15623	17236	17752	18086	19356	19947	19587	20783	20961	20613	20717	21616	21014	20813	20812	20660	19893	19311	19138	18997	18434	17954
G2	2587	2436	2432	2563	2869	2915	3349	3676	4036	4216	4329	4936	5492	5983	6585	7314	7940	8701	8847	10268	10386	11275	12337	13725	13879	15079	15783	16162	16893	18116	18940	19104	19377	19751	19853	21304	21105	20689	21792	20322	21097	20469	19845	20621	19429	20480	19585	18381	17955
G3	2764	2341	2412	2584	2747	2795	3141	3571	3751	3659	4236	4819	5203	5910	6277	7505	7395	8742	9305	10352	10808	11390	11894	12919	13694	14240	15231	16475	17375	17643	18487	19120	19858	19491	20242	20601	19917	20582	20947	20648	20600	20329	19519	19592	19459	18831	19331	17473	17499
H1	2720	2668	2523	2492	2528	3132	3120	3624	3828	4300	4724	5333	5422	6180	6974	7098	8420	8677	9281	10482	11543	11800	12821	13447	14356	15526	16735	16949	17769	18444	19613	19578	20288	19887	20300	20753	21239	21223	20456	21824	21449	21433	20520	21263	21054	20135	18837	19636	18432
H2	2768	2444	2674	2427	2884	3059	3258	3341	4063	4410	4559	5062	5682	6237	7007	7065	7768	9026	9510	10458	11345	11582	12664	13663	14075	15599	15864	16287	17693	18328	19229	19221	19818	20761	21464	21683	21804	21164	20888	21170	21655	20629	20941	20284	19964	19684	18555	18506	18592
H3	2726	2408	2639	2863	2824	2909	3016	3604	3828	3956	4581	4841	5521	5784	6404	7105	7777	8627	9353	9865	10701	11957	12522	13400	13850	15675	15859	16132	17735	18062	18548	19765	20111	20792	20179	21329	20807	20816	20888	20798	21361	20373	19975	20095	19606	19238	18906	18534	18226
															TMR int.	SiR int.	Ratio (TMR/SIR)			[H2O2] (M)	Mean Ratio (TMR/SIR)	SD
														A1	17952	31271	0.574078			0.001	0.582074	0.0138072
														A2	19908	33290	0.598017			0.0002	0.574955	0.0095843
														A3	19177	33402	0.574127			4e-05	0.556683	0.00996675
														B1	21410	37379	0.572782			8e-06	0.555749	0.0109466
														B2	21337	37655	0.566645			1.6e-06	0.538512	0.0121122
														B3	22420	38296	0.58544			3.2e-07	0.559052	0.0104807
														C1	21724	38670	0.561779			6.4e-08	0.537023	0.0101108
														C2	21310	37846	0.563071			1.28e-08	0.54157	0.00196961
														C3	21694	39791	0.545199
														D1	21782	38490	0.565913
														D2	21717	38977	0.557175
														D3	20936	38474	0.54416
														E1	20965	39942	0.524886
														E2	20541	37857	0.542595
														E3	21053	38414	0.548055
														F1	22179	38883	0.570404
														F2	21382	38387	0.557011
														F3	20595	37463	0.549742
														G1	20717	38338	0.540378
														G2	20689	39358	0.525662
														G3	20582	37763	0.545031
														H1	21223	39086	0.542982
														H2	21164	39242	0.53932
														H3	20816	38377	0.542408
[truncated: 152 more columns]
