# Supplementary material for: Semisynthetic biosensors for mapping cellular concentrations of nicotinamide adenine dinucleotides
Source: eLife. 2018 May 29;7:e32638. doi: 10.7554/eLife.32638 (PMC5990361; doi:10.7554/eLife.32638)
Supplement: Appendix 1—figure 3—source data 1. [file elife-32638-app1-fig3-data1.xlsx]

## Sheet: App1_Figure_3d
		Integrated intensity					SPR normalized by beta-tubulin
Line 1	U2OS_beta_tubulin	4977.1				U2OS	1.35717
Line 1	U2OS_SPR	6754.78				HeLa	1.24461
Line 2	HeLa_beta_tubulin	5018.45				HEK293	0.45691
Line 2	HeLa_SPR	6246				A549	2.52428
Line 3	HEK293_beta_tubulin	6122.15
Line 3	HEK293_SPR	2797.28
Line 4	A549_beta_tubulin	4774.86
Line 4	A549_SPR	12053.1
