# Supplementary material for: Semisynthetic biosensors for mapping cellular concentrations of nicotinamide adenine dinucleotides
Source: eLife. 2018 May 29;7:e32638. doi: 10.7554/eLife.32638 (PMC5990361; doi:10.7554/eLife.32638)
Supplement: Appendix 1—figure 3—source data 2. [file elife-32638-app1-fig3-data2.xlsx]

## Sheet: App1_Figure_3e
Emission spectra of purified NADP-Snifit in freshly prepared U2OS lysate (0.5 mg/mL total protein)
	Lysate	Lysate + 2.5 mM sulfapyridine	Lysate + 10 mM NADP+
Wavelength (nm)	Intensity (a.u.)
544	0.31558	0.41705	0.5091
545	0.35233	0.41641	0.46013
546	0.3379	0.47235	0.44672
547	0.34191	0.4604	0.46178
548	0.37673	0.52351	0.50132
549	0.4596	0.59665	0.44755
550	0.51897	0.65928	0.52383
551	0.56108	0.77721	0.49851
552	0.64946	0.86805	0.53408
553	0.73055	1.02343	0.63187
554	0.83752	1.12669	0.6777
555	0.84556	1.23697	0.6595
556	1.00446	1.49195	0.73594
557	1.12022	1.55713	0.82991
558	1.27451	1.80653	0.8678
559	1.43163	2.01371	0.9047
560	1.61241	2.14725	0.97816
561	1.69528	2.50215	1.02515
562	1.89689	2.65259	1.1552
563	1.98527	2.88558	1.23097
564	2.16143	3.08542	1.27713
565	2.40024	3.3812	1.29616
566	2.54412	3.56414	1.38584
567	2.54947	3.85992	1.47948
568	2.76923	4.08319	1.47088
569	2.8655	4.19857	1.62707
570	3.02976	4.39363	1.63352
571	3.11278	4.60988	1.6451
572	3.26112	4.79602	1.74239
573	3.33879	4.99729	1.76059
574	3.47047	4.96924	1.82958
575	3.50067	5.19315	1.76473
576	3.64425	5.20574	1.77862
577	3.61018	5.28223	1.79782
578	3.54114	5.36765	1.78144
579	3.54307	5.30582	1.81883
580	3.47597	5.38534	1.8233
581	3.63413	5.25912	1.88468
582	3.55602	5.24143	1.7275
583	3.47597	5.15841	1.70599
584	3.41735	5.15251	1.65073
585	3.45216	5.02598	1.74619
586	3.25651	4.93052	1.60821
587	3.28106	4.88239	1.58322
588	3.09716	4.61036	1.51489
589	3.07901	4.491	1.46476
590	2.97962	4.41944	1.40056
591	2.83157	4.13482	1.37624
592	2.72207	4.05817	1.27978
593	2.70466	4.01402	1.32181
594	2.61553	3.7404	1.23627
595	2.44696	3.68414	1.17124
596	2.35292	3.51968	1.12277
597	2.32674	3.48382	1.11085
598	2.19268	3.22406	1.02747
599	2.03571	3.069	1.0139
600	2.08183	3.03586	1
601	1.95536	2.80717	0.92886
602	1.76283	2.55745	0.81287
603	1.74676	2.61386	0.80377
604	1.62163	2.47267	0.78392
605	1.55066	2.33562	0.79054
606	1.49234	2.25849	0.72187
607	1.42226	2.1592	0.75695
608	1.3922	2.06072	0.70086
609	1.36393	2.02311	0.6552
610	1.32049	1.98598	0.65387
611	1.2394	1.91124	0.68101
612	1.22273	1.74295	0.62525
613	1.13272	1.73179	0.64841
614	1.16248	1.65131	0.5407
615	1.08213	1.64558	0.57545
616	1.08064	1.63618	0.5589
617	1.0125	1.46422	0.58819
618	1.02336	1.53195	0.52747
619	1.0061	1.52287	0.53293
620	1.01934	1.47745	0.5589
621	0.94168	1.45163	0.52647
622	1	1.42199	0.54368
623	0.91043	1.39761	0.51257
624	0.90478	1.33625	0.53491
625	0.86847	1.26884	0.50761
626	0.85092	1.30614	0.55692
627	0.90195	1.27888	0.5412
628	0.88052	1.20462	0.51605
629	0.8832	1.2757	0.52647
630	0.89704	1.18215	0.60523
631	0.84824	1.1839	0.59348
632	0.88439	1.15681	0.57164
633	0.82934	1.10996	0.59315
634	0.77414	1.16494	0.62194
635	0.86817	1.15108	0.6049
636	0.82666	1.15761	0.60109
637	0.87785	1.09785	0.60688
638	0.86163	1.04446	0.68398
639	0.84839	1.03347	0.66248
640	0.9268	1.04478	0.76142
641	0.91579	1.04765	0.79533
642	0.96563	1.03426	0.85175
643	1.0061	1.00478	0.93696
644	1	1	1
645	1.03199	1.0153	1.03491
646	1.11189	0.96382	1.14378
647	1.1659	1.08271	1.30046
648	1.20696	0.99873	1.34332
649	1.23836	1.0255	1.5096
650	1.35679	1.03697	1.67174
651	1.40946	0.99219	1.7184
652	1.49323	1.03841	1.85473
653	1.62699	1.06088	2.05625
654	1.6313	1.06534	2.17091
655	1.80226	1.03729	2.31833
656	1.78173	1.06151	2.42869
657	1.96191	1.17211	2.58422
658	2.05193	1.1651	2.66578
659	2.00491	1.15299	2.82512
660	2.07558	1.19729	2.93101
661	2.22467	1.16127	3.0766
662	2.29028	1.16	3.26324
663	2.35783	1.19681	3.24669
664	2.28284	1.24446	3.38468
665	2.37896	1.2102	3.46062
666	2.36646	1.17323	3.33422
667	2.30055	1.1592	3.46211
668	2.39086	1.23108	3.39394
669	2.32287	1.1192	3.3041
670	2.26737	1.06438	3.25248
671	2.22675	1.08414	3.36499
672	2.26469	1.05689	3.34927
673	2.19804	1.0502	3.11995
674	2.20592	1.00701	3.14891
675	2.0485	0.98518	3.08703
676	1.95923	1	2.95731
677	1.92531	0.93211	2.87624
678	1.8161	0.8612	2.71327
679	1.81699	0.81339	2.78441
680	1.77206	0.79235	2.41231
681	1.55334	0.77131	2.41893
682	1.55766	0.75378	2.227
683	1.51198	0.68845	2.19557
684	1.40559	0.6639	1.97253
685	1.34251	0.61498	1.94739
686	1.18197	0.57498	1.82032
687	1.10787	0.58837	1.73842
688	1.10043	0.49896	1.6269
689	1.04449	0.52351	1.47154
690	1.03467	0.4596	1.30443
691	0.95313	0.44096	1.33786
692	0.88648	0.43283	1.33355
693	0.81744	0.43076	1.17124
694	0.75316	0.3659	1.1451
695	0.68829	0.3651	1.07793
696	0.65035	0.35841	0.9406
697	0.67728	0.31936	0.8961
698	0.60631	0.32112	0.81916
699	0.55022	0.30709	0.77978
700	0.51019	0.29498	0.74504
701	0.50796	0.29084	0.69573
702	0.48549	0.25291	0.69821
703	0.49695	0.24335	0.61532
704	0.4419	0.23139	0.57512
705	0.44577	0.2392	0.57148
706	0.40128	0.2255	0.56734
707	0.37777	0.23044	0.58405
708	0.41229	0.22359	0.5503
709	0.34935	0.19219	0.45566
710	0.31781	0.20048	0.47915
711	0.35411	0.19235	0.44838
712	0.37613	0.20096	0.48858
713	0.3309	0.16526	0.44292
714	0.30769	0.18231	0.46327
715	0.33075	0.17578	0.43216
716	0.27972	0.15538	0.4315
717	0.30888	0.14853	0.45086
718	0.29802	0.14645	0.38931
719	0.30412	0.14454	0.37707
720	0.27273	0.15618	0.40371
721	0.30978	0.1506	0.38898
722	0.27853	0.14135	0.39494
723	0.2757	0.14486	0.37641
724	0.26484	0.14167	0.34067
725	0.27228	0.12367	0.39808
726	0.26112	0.13116	0.37111
727	0.24565	0.14151	0.34778
728	0.25472	0.14056	0.35026
729	0.24862	0.13928	0.37062
730	0.24401	0.12112	0.38203
731	0.26826	0.12956	0.36913
732	0.24862	0.14088	0.34563
733	0.24133	0.13546	0.386
734	0.2272	0.14231	0.34166
735	0.25532	0.11554	0.36267
736	0.24029	0.12127	0.36499
737	0.24476	0.12446	0.32528
738	0.24505	0.13434	0.34464
739	0.23702	0.12606	0.37459
740	0.26469	0.13307	0.33173
