# Supplementary material for: Semisynthetic biosensors for mapping cellular concentrations of nicotinamide adenine dinucleotides
Source: eLife. 2018 May 29;7:e32638. doi: 10.7554/eLife.32638 (PMC5990361; doi:10.7554/eLife.32638)
Supplement: Appendix 1—figure 7—source data 1. [file elife-32638-app1-fig7-data1.xlsx]

## Sheet: NAD_cyto
Control	NA	NAM	NMM	NR	FK866	Metformin	Phenformin	Rotenone	Oligomycin A				Control	NA	NAM	NMN	NR	FK866	Metformin	Phenformin	Rotenone	Oligomycin A
1.08081	1.17876	0.9702	0.96461	0.87732	1.55118	0.64974	0.85294	0.54211	1.14005			min	0.48899	0.432176	0.566295	0.369113	0.333522	1.02481	0.402182	0.361255	0.221384	0.54631
1.25205	0.98756	0.51019	0.84227	0.70386	1.6467	1.09649	0.95363	0.76862	1.14657			25th	0.876442	0.775375	0.826029	0.69634	0.660783	1.49737	0.721965	0.703469	0.555821	0.981717
1.20407	0.61337	0.81351	0.84642	0.8118	1.76056	0.98231	0.59124	0.66121	1.20243			median	1	0.88202	0.914088	0.797573	0.757508	1.68053	0.827255	0.822972	0.670486	1.12158
1.24638	0.92346	0.75274	1.52282	0.65692	1.66791	0.64757	0.61257	0.38832	1.11381			median	1	0.88202	0.914024	0.797573	0.757508	1.68053	0.827255	0.822972	0.670486	1.12158
1.46513	0.68381	0.8711	0.83267	0.55398	1.70017	0.8656	0.74706	0.3397	1.69953			median	1	0.88202	0.914029	0.797573	0.757508	1.68053	0.827255	0.822972	0.670486	1.12158
4.8682	5.77472	0.80951	0.84254	0.87199	1.32205	0.845	0.94794	0.50097	1.32332			75th	1.13474	1.00417	0.999185	0.914492	0.878956	1.8124	0.935154	0.931611	0.778779	1.27199
0.66841	0.66724	0.95825	1.01218	0.54617	1.82622	0.55508	0.6507	0.36885	1.0398			max	1.5222	1.34737	1.25892	1.24172	1.20622	2.28496	1.25494	1.27382	1.11322	1.7074
1.37196	0.82604	0.99872	0.64305	2.74326	1.07182	0.84258	0.71084	0.60416	0.96086
0.72713	0.84123	0.98052	0.73495	0.57332	1.4607	0.78558	0.8013	0.81599	1.24666
2.80261	0.69795	0.96561	0.96995	0.62312	1.72254	1.39152	0.577	0.68809	1.12627
1.06986	0.95603	0.9843	0.93076	0.97318	1.76399	0.65997	0.92341	0.43805	1.04643
1.02493	0.83549	0.72118	0.71237	0.56227	1.61344	0.71462	0.69242	0.87439	1.10815
1.21388	1.06227	0.84179	0.89723	0.93679	1.60861	0.73586	0.78637	1.03277	1.10906
0.91684	1.10836	1.27165	0.61819	0.66338	1.42058	0.78472	0.84948	0.46684	0.81018
2.02367	1.02594	0.92208	0.72847	0.85528	1.7281	0.80468	0.82331	0.49027	1.17886
0.96031	2.08851	0.79217	0.63441	0.73086	1.55935	0.87071	0.70463	0.68952	1.49886
0.71399	0.69603	1.04173	0.90919	0.70488	1.49708	0.6398	0.80346	0.49405	0.97243
1.23164	0.93925	0.74912	1.02781	0.90802	1.52522	1.06146	0.76386	0.4868	0.9932
2.06022	0.98012	0.67206	0.52359	0.62425	1.63615	1.49836	0.80497	0.66058	1.47833
1.08831	1.05415	0.98281	0.63057	0.61936	1.77018	0.6172	0.64543	0.65872	1.41688
0.74787	1.02183	0.67754	0.7277	0.60363	2.09557	0.70845	0.65534	0.70577	1.11508
1.09533	0.86758	0.85528	0.89095	1.01543	2.03572	0.83939	0.7286	0.45405	1.42951
0.79634	0.80232	0.85261	0.77122	0.74404	2.03489	0.90498	0.61372	0.86072	1.03747
1.26593	0.9922	0.99761	0.69006	0.83787	2.25011	0.9787	0.79671	0.50629	1.40014
0.84464	1.56555	1.59498	0.79265	0.775	1.43381	0.99476	0.91855	0.64311	1.03135
0.99103	1.00648	0.96079	0.75288	0.59384	2.0744	0.91201	0.89821	0.87469	1.20083
1.03839	0.83701	0.98273	0.86403	1.19952	1.40416	0.82419	0.9237	0.58108	1.02883
1.13286	0.99292	0.86714	1.5342	1.48046	1.65332	0.76741	0.79126	0.84064	1.0716
1.0022	0.83137	1.0191	0.74338	0.67465	1.77761	0.43967	0.89606	0.73636	0.90035
1.12418	0.85948	0.83797	1.33889	0.68393	1.95175	0.9165	0.79609	0.61328	1.38297
1.09292	0.9723	0.59077	0.79163	0.90199	1.72829	0.73093	0.70892	0.77333	0.88212
0.8301	0.96324	0.97382	0.7239	0.9738	1.90292	0.7559	0.9591	0.71116	1.15163
3.15565	1.14873	0.90273	0.85874	0.85449	1.79134	0.72589	0.89648	0.45408	1.22991
1.1811	0.84376	0.76726	1.17453	0.62664	1.83096	0.80616	1.10644	0.59069	0.89449
0.94103	0.99466	0.84759	0.65137	0.85846	1.58069	0.76325	0.95008	0.66466	1.40995
0.63898	0.75058	0.8926	0.84405	0.77997	2.16615	0.68805	0.68023	0.59929	0.82104
2.66884	1.20281	0.98025	0.69625	0.98123	1.45132	0.77568	1.00172	0.5452	1.15825
0.85075	1.21033	0.7471	0.7529	1.1115	1.75621	0.74961	0.61118	0.45698	1.19452
1.4125	0.64004	0.85334	0.92065	0.71576	1.70854	0.73099	0.73538	0.68981	1.26463
1.12115	2.59265	0.78151	0.62347	0.68075	1.73191	1.40774	0.77362	0.68485	1.40679
0.82125	1.93554	0.97065	1.86895	0.67737	1.31083	1.30565	0.66886	0.86888	0.74411
1.23224	2.3873	2.05384	0.67017	0.57699	1.69898	0.905	0.79003	0.68339	1.16909
1.20855	0.76698	0.75451	1.51983	0.56916	1.81082	0.79589	0.80239	0.69734	1.01985
1.05776	0.70133	0.77253	0.61258	0.73897	1.87719	0.77324	0.63868	0.52519	0.8052
2.33783	0.80093	0.91452	0.89416	0.73979	1.86689	1.48794	0.88324	0.47586	0.96107
1.01622	0.91356	0.84833	0.81909	0.74229	1.80653	1.80499	0.85097	0.34885	1.03196
1.10722	1.00702	0.94264	0.84849	0.66097	1.61421	0.39749	2.71366	0.34836	1.18135
0.94453	0.80267	0.8919	0.8506	1.95074	1.81533	0.52055	0.58266	0.64244	0.80236
1.07576	2.41746	0.89891	1.05852	0.83975	1.09903	0.68441	0.69536	0.76535	0.97743
0.92504	1.00215	0.83208	1.04504	0.84878	1.6317	0.79154	0.37859	0.53674	1.26104
0.70209	1.21355	0.79747	0.64002	1.22601	1.3062	0.74489	0.62001	0.80009	0.97095
0.70269	0.76591	1.26018	1.06908	0.72489	1.9167	1.23504	0.77581	0.69388	1.25478
1.0056	0.95246	0.81479	1.14047	0.68761	1.86719	0.96923	1.08472	0.86753	1.15214
1.04801	0.63199	1.55287	0.54448	0.99165	1.79564	1.02954	0.70877	0.71323	1.61032
1.21211	0.9807	1.17723	2.15199	0.61443	1.54106	0.71205	0.73046	1.02765	1.26057
0.93756	0.79933	0.89607	0.88999	0.55171	1.58123	0.80589	1.01028	0.67188	1.46583
1.083	1.18268	0.93097	0.61471	0.79275	1.81511	1.12076	1.16735	0.93977	1.38928
1.13411	0.82342	0.88626	0.66245	0.79551	1.73158	0.9317	0.86043	0.8584	1.04828
1.14119	0.73282	1.00271	0.81904	0.70988	1.25585	0.91675	4.5118	0.78028	1.26087
0.84279	1.13402	0.80019	0.77492	2.33697	1.81243	1.1368	1.02639	0.73211	1.13902
2.38878	1.08971	0.95403	0.82504	0.52286	1.8703	0.94766	0.77288	0.86796	0.84894
0.56659	0.93365	0.77065	0.92623	0.65356	1.80732	0.86921	0.53791	0.54078	1.00749
0.79096	1.70109	0.82099	1.02961	1.16531	1.85475	0.86838	0.45306	0.47254	1.18561
0.92433	1.21444	0.87547	0.70705	1.05469	2.04052	0.71178	0.55118	0.81573	0.72459
1.04585	0.93367	0.91326	0.72777	0.81221	1.96556	0.50802	0.82464	1.20675	0.94382
1.24788	1.04412	0.76167	1.70658	0.84276	1.58422	0.91079	0.79954	0.60583	1.2524
0.96466	1.28183	0.86707	0.859	2.37625	1.93291	0.50779	0.94024	0.57546	1.31666
1.00285	0.80082	0.62973	0.66375	0.69935	1.66547	1.31251	0.89554	0.85217	0.99881
1.15078	1.09943	1.06647	0.71555	0.94197	1.85825	0.9747	0.85326	0.63447	1.50691
0.87629	0.69812	1.03694	0.48448	0.71462	1.09111	0.82841	0.75218	0.78869	1.20711
1.08492	0.83901	0.79522	0.73168	0.96612	1.61339	0.87246	0.81054	0.49225	1.41303
2.94137	1.56417	0.76664	0.76105	2.4027	1.66088	1.2486	0.89006	0.64608	0.81085
2.35322	0.92125	0.90133	0.7737	0.61917	1.87267	0.98412	0.62	0.85823	1.1699
1.05145	0.83274	1.83445	0.68668	1.61319	1.76096	1.34249	1.02113	0.80695	1.24877
0.91785	0.84407	0.86047	0.85916	0.73072	1.85309	0.67998	0.69829	0.48112	0.78713
2.76203	1.16594	0.89517	0.64261	1.8107	1.17682	0.92188	0.41774	0.66547	0.64291
1.18872	0.98519	0.49959	0.91898	0.94684	2.04672	0.78206	0.93487	0.53721	1.02856
0.84113	1.07894	0.88465	0.84233	0.87067	1.83903	0.70648	0.95559	0.60856	1.17846
1.27528	1.34546	1.00246	0.72549	1.54875	1.73111	0.99629	0.96519	0.83715	0.93564
1.03156	0.47787	0.93543	0.83025	0.60301	1.93276	0.83099	0.64403	0.60984	0.92196
1.08602	1.13025	0.83057	2.04211	0.76416	1.67832	0.91179	1.2515	0.61507	1.04318
0.86114	0.92136	0.82724	0.8038	2.32722	1.71457	0.81524	0.37937	0.99489	1.3066
1.05752	1.06611	0.71427	0.62304	1.04858	1.92192	0.91607	0.68272	0.69014	1.41277
0.96679	1.10818	0.83038	0.83314	0.78824	1.77029	0.85412	1.42007	0.87911	1.1648
0.96338	0.87767	1.0149	0.96057	0.73165	1.98379	1.04237	0.9182	0.45511	1.1543
1.10088	0.64715	0.85086	0.90238	1.0545	1.65704	1.04012	0.85396	0.64818	1.27211
1.69017	0.85611	0.80829	0.45414	0.71432	1.42827	0.88689	0.39176	0.52355	1.19206
0.96905	0.81891	0.86598	0.83703	0.5704	1.51002	0.84133	0.80514	0.44084	0.94904
2.12258	0.56737	0.72591	0.71187	0.55872	1.67548	0.72578	0.4681	0.53486	2.65531
1.09384	0.60433	0.93017	0.84721	0.69564	1.81842	0.92503	0.99072	0.651	1.12551
1.29295	1.20321	0.99768	1.21115	1.15688	1.25962	1.02428	0.95367	0.69431	1.26695
0.96986	0.90901	0.80715	0.7748	0.76386	1.27417	0.87649	0.84679	0.54672	1.76386
1.64639	1.48848	0.46913	0.96224	0.67645	1.74808	1.1915	0.7287	0.66889	1.40755
0.92642	0.92419	0.92494	0.77937	0.90766	1.36953	0.9263	0.92507	0.89927	1.16168
2.2178	0.88912	1.13095	0.7226	0.67538	2.19924	0.65448	0.78744	0.70314	1.02473
1.6529	0.97078	0.82758	0.89417	0.58158	1.76516	0.64132	0.88869	0.63759	1.2929
0.94285	0.91507	1.66375	0.68495	0.89766	1.54458	0.9326	0.7653	0.5254	1.2905
0.9059	1.0879	0.83258	0.64728	0.83794	1.47532	0.58985	1.03438	0.62222	1.10521
1.19727	0.7716	0.99097	0.7397	0.87756	1.87576	0.76044	0.59201	0.86992	1.17597
0.98305	1.11001	0.73531	0.76447	0.78994	1.67099	0.80786	0.88183	0.44543	1.13461
1.04171	0.91813	0.95981	0.80181	0.59071	2.01866	0.80719	0.64475	0.73768	0.77903
0.89071	0.7622	0.87053	1.00328	0.61772	1.35921	0.565	0.84372	0.57421	0.96927
0.99199	1.166	0.84765	0.87167	0.63233	1.54887	0.55141	0.80536	0.50536	1.26618
0.94055	1.18858	0.96751	0.80864	0.75179	1.71229	0.98426	0.46435	0.43541	1.12525
1.14255	1.02442	0.89001	0.96998	0.61407	1.52258	0.56849	1.0419	0.73631	1.35554
0.92379	0.87218	0.81931	0.75713	0.73524	1.20051	0.92628	1.02665	0.60985	1.15294
0.78722	1.02321	0.66697	0.80905	1.0165	1.52173	0.78911	0.88824	0.87302	0.94531
0.94417	1.34182	0.89621	0.72034	0.62673	1.51657	0.58728	0.92167	1.00978	1.23913
1.0641	1.01864	0.88376	0.90458	0.56998	1.72848	0.70716	0.70567	0.38373	1.42774
1.04782	0.91852	0.8198	0.51084	0.85527	1.77128	1.30244	0.72507	0.78424	0.9423
1.06597	1.08226	0.84399	0.80616	0.85551	2.15457	0.90766	0.54897	0.68835	1.21063
1.3395	0.63546	1.45806	0.717	0.97574	2.48123	0.959	0.9272	0.50387	1.14653
1.00498	0.79814	0.92061	0.57504	0.8595	1.89378	1.01676	1.29122	0.69654	1.30206
0.82905	0.90714	0.76054	0.82381	0.86334	1.91623	0.74481	0.82828	0.77665	1.11979
0.90205	1.75451	0.8389	0.55557	1.42995	1.97984	1.03229	0.98096	0.80929	1.10235
1.34191	0.8859	1.09941	0.66389	0.6961	1.6301	0.77462	0.59984	0.52401	1.35845
0.96797	0.95061	0.68553	0.70509	0.61848	1.81739	0.71689	0.96384	0.66944	1.09224
1.0509	0.85923	0.83476	1.01881	0.63138	2.37241	0.4389	0.79864	0.58168	1.02303
1.11759	0.77897	0.82271	0.76427	0.57721	1.69497	0.79945	0.99335	0.47939	1.40775
0.84776	0.72437	0.95087	0.53853	0.79669	2.05106	0.87358	0.81503	0.58779	1.51636
1.10514	1.18403	0.73521	0.69022	0.84492	1.714	1.04329	0.66311	0.86881	1.31429
1.15177	0.90831	0.7145	1.03687	0.90959	1.6891	0.90431	0.91343	0.43339	1.23112
0.93427	0.6698	0.68743	1.47819	1.68438	1.63523	0.89464	0.78156	0.74221	1.02005
0.78825	0.95469	0.97415	0.75164	0.88047	1.64312	1.00486	0.67583	0.3587	1.13296
1.19394	0.92499	0.94271	0.87011	0.72302	1.61081	0.76127	0.76388	0.74813	1.38542
0.98143	0.83092	0.99715	0.81329	0.71546	1.72571	5.32996	1.09666	0.74323	0.82207
2.56987	0.79335	0.97836	1.41771	0.97201	1.29168	0.96811	0.85842	0.80817	1.36812
0.944	0.70839	0.65334	0.83794	0.85988	1.81227	0.70432	1.00896	0.66846	1.12132
0.94435	0.8608	0.88652	0.95153	0.58201	1.34238	0.89464	0.98814	0.54866	0.55163
0.97281	0.76616	0.93098	0.87251	0.6609	1.23857	0.60801	0.94411	0.72705	0.80569
0.94325	0.80576	0.90832	0.82215	2.00386	1.20529	0.7544	0.49855	0.56951	1.14271
1.09943	2.21905	0.924	0.71527	1.91037	1.55241	0.81734	0.73872	0.58614	0.93729
0.7983	0.72909	0.81953	0.83437	0.8024	1.32144	0.85121	0.97492	0.74856	1.11451
2.40945	0.84688	0.95502	0.90625	0.63453	1.62279	0.82571	0.80018	0.54431	1.13852
1.181	0.88621	0.82033	0.86248	0.98111	1.53505	1.11162	0.84635	1.01433	1.01489
1.08961	0.9916	0.74401	0.67439	0.39041	1.74011	0.7958	0.69819	0.66603	1.23102
1.06243	0.43828	0.91233	0.58381	0.57242	2.09236	0.69535	0.79754	0.55062	1.18329
0.91523	0.96817	1.00821	0.75629	1.84158	1.65849	1.08242	0.75749	0.9072	1.04167
2.61506	0.68763	0.89784	2.15358	0.84134	1.80672	0.66634	0.97048	0.57034	2.15012
1.89468	1.02837	0.85108	0.99782	0.79757	1.96722	0.63253	0.69857	0.83391	1.24816
0.70397	1.03977	0.90329	0.71343	0.45624	1.72537	0.63748	0.94717	0.6694	1.74717
0.87232	1.03136	0.88061	0.86437	0.62157	1.82525	0.9679	0.53674	0.50208	1.14987
1.06273	0.95347	0.57668	0.71459	0.86637	1.63606	0.90805	0.81267	0.83099	1.15628
0.67464	0.88685	0.73378	0.85971	0.60694	1.11757	0.8215	0.86862	0.35708	1.40765
2.30547	0.76149	0.87345	0.8032	2.52558	1.33617	0.9014	0.70123	0.75001	1.14222
0.92299	0.95785	0.76576	0.86382	0.85772	1.71255	0.69707	1.01747	0.58017	1.42968
0.77468	0.99595	0.91925	0.62266	0.51728	1.74747	1.01536	0.79517	0.75838	1.20815
0.8562	1.13124	0.90899	1.47156	0.71753	1.66357	0.88967	0.71064	0.55515	1.28287
0.89263	0.76436	0.90625	0.91844	1.09723	2.05148	0.98563	0.70127	0.69964	1.3278
1.18071	0.74399	0.816	0.76002	0.91588	1.887	0.84317	0.62851	0.76245	1.28849
1.11685	1.33257	0.70147	0.82245	0.69699	1.78145	0.82171	0.59645	0.64345	1.17691
1.33072	0.73859	1.54197	0.56828	0.62055	1.32352	0.84719	0.85151	0.97951	1.42657
2.14794	0.90543	0.95486	0.76278	0.61123	1.15743	0.90495	0.76666	0.50296	1.24934
0.91436	0.87483	1.0242	0.88202	1.02288	1.83485	0.84798	0.89383	0.48174	1.08389
0.75198	0.86123	0.81764	2.63465	1.06751	1.51516	0.5732	0.81339	0.84809	0.83566
0.95756	0.88743	0.94721	0.68703	0.68809	0.85817	0.97561	0.71914	0.61842	0.94353
0.97782	0.82447	1.06574	0.77995	0.77925	1.6484	0.76437	0.6944	0.94501	1.11175
1.12188	0.98608	0.83233	0.78408	0.69347	1.39601	0.77477	0.92363	0.72773	1.08226
1.19923	1.02677	0.81809	0.81606	0.7284	1.31045	0.48227	0.81003	0.85454	0.81301
1.09225	1.0243	0.92193	0.85795	0.91825	2.4865	0.80767	0.7217	0.54607	1.25565
2.09291	0.78271	0.82492	0.62627	1.75498	1.56629	0.46474	1.21826	0.6934	0.79512
1.18128	0.69021	0.9695	0.86763	0.73579	1.38769	0.79074	1.08613	0.61719	2.47016
0.84242	0.69529	0.97804	0.7493	0.40655	0.09136	0.94724	0.784	0.64705	1.97721
1.09082	0.73714	0.96701	0.77885	0.87157	1.71572	0.79209	0.75068	0.93565	1.41944
0.94879	0.72393	0.78522	0.85378	0.97645	1.99301	0.65042	0.93172	0.52656	1.18157
0.98261	0.75812	1.04252	0.66919	0.74192	1.71972	0.96727	1.06933	0.79624	0.65279
0.98141	0.77862	0.68231	0.86522	0.6926	1.67094	1.02554	0.81099	0.62073	1.14017
1.01362	0.74867	1.00952	0.80689	1.50185	1.8997	0.82114	1.4153	0.66129	1.21873
0.93102	0.73873	0.83798	0.78551	1.0501	1.22201	0.79767	0.68387	0.80554	1.29201
1.02382	0.84929	0.7885	0.98523	0.6725	1.71245	0.86374	0.93622	0.39604	1.12418
1.16274	0.80146	0.9367	0.93973	0.91251	1.5406	1.03015	0.95722	0.94775	1.01655
0.9378	1.03228	0.92339	0.97462	1.05673	1.33149	0.48428	0.7752	0.72348	1.35822
0.75763	0.92253	0.7859	0.7006	0.93231	1.50472	0.69007	0.38393	1.13071	1.30082
1.00171	1.91466	0.99453	0.89174	0.86902	1.93645	1.14214	0.81408	0.74447	0.94704
1.68807	1.00709	0.88909	1.04142	0.93655	0.32773	0.71417	0.50593	0.72083	1.19768
1.08199	0.71733	0.90874	0.89189	1.04735	0.94501	0.7668	0.95354	0.67782	1.30743
0.89648	0.81694	0.75507	0.96835	0.65016	1.04227	0.85891	1.46337	0.41672	0.93542
2.12486	0.59321	0.70323	0.77313	0.63707	1.88975	0.64125	0.70807	0.53446	1.12363
1.03776	0.58927	0.95717	0.79082	0.8555	1.85177	0.7884	0.63259	0.83096	0.64443
2.01291	0.69459	0.89373	0.71529	0.75939	1.95876	0.80442	0.95968	0.689	0.95735
1.07328	1.40962	0.74367	0.95215	0.84016	1.46915	0.82965	0.83514	0.6793	0.91198
1.03966	0.8475	0.80221	1.02331	1.25684	1.86322	0.88014	0.89994	0.74184	1.39185
0.82898	1.49557	0.90039	0.63465	0.92972	2.45993	0.91911	0.77467	0.50662	1.38195
1.05259	1.93463	0.99475	0.83299	0.44769	1.99864	0.81361	0.89364	0.65526	0.90399
2.44573	0.5094	0.84998	5.67944	0.83481	1.20812	1.00381	0.83411	0.64328	0.99427
1.01532	1.50561	0.90158	0.95324	0.61842	1.2915	0.89156	1.02844	0.53069	1.10238
1.12009	2.07744	1.67274	0.70817	0.75678	1.4321	1.00744	0.62183	0.53278	1.31328
0.72462	1.18573	0.79692	1.01328	0.7744	1.74348	0.80358	0.77537	0.61156	1.25455
1.06582	0.8208	1.09738	0.82317	0.89013	1.70326	0.96807	1.08597	1.02999	0.93569
1.12294	2.66056	0.82182	0.88434	0.81169	1.69235	0.84752	0.96552	0.78679	1.21086
1.10638	1.10077	0.70609	0.91222	0.70967	1.76039	0.79698	0.94099	0.82754	1.38265
1.21407	1.03889	1.00301	0.53883	0.65437	1.30618	1.02136	0.84493	0.73948	1.13581
0.86311	0.82596	0.72648	0.88947	0.51299	1.7948	1.15865	0.88716	0.61534	1.3373
1.06474	0.79947	0.7957	0.7375	0.75514	1.85197	0.95654	1.06834	0.80245	1.1252
1.11276	0.75855	0.74859	0.7694	0.7772	1.77781	0.80728	0.7694	0.49693	1.10955
1.07549	0.90727	1.2948	0.74585	0.78252	1.66222	1.03899	0.84114	0.81028	1.23581
1.00478	0.84565	0.98232	0.79325	0.76277	1.54305	0.60381	0.84008	0.60854	1.2117
0.80945	2.05722	0.97589	0.63454	0.83532	1.93685	0.93783	0.7819	0.44309	1.51967
1.16975	0.99875	0.68065	0.92221	0.73289	1.8155	0.75811	0.96066	0.87111	1.39989
0.83342	0.88698	0.94231	0.89584	0.7094	1.35544	0.99165	0.8525	0.82251	1.25202
0.87883	0.99686	0.90837	0.93236	0.6097	1.88161	0.63329	0.56052	0.50556	0.87137
0.95807	0.76892	1.63081	1.49665	1.07503	1.75692	1.72486	0.54383	0.35689	1.28408
0.86878	2.16691	0.91884	0.78763	0.70319	1.43098	0.78529	0.38165	0.88218	1.19552
0.6806	0.94097	0.76883	1.49839	0.65138	1.54517	0.72649	0.8289	0.78008	1.32905
0.90406	1.09283	1.07827	0.91218	0.54792	1.45209	0.76038	0.97488	0.64807	1.08991
0.95119	2.18494	1.03444	0.83769	0.76623	1.69965	0.71047	0.50049	0.7821	1.35914
0.93161	0.86755	0.96724	0.7929	0.79566	1.9221	1.03616	0.94446	0.63535	1.4426
1.01344	0.60676	0.80165	0.65216	0.65216	0.88359	0.82934	0.77306	0.5516	0.94645
0.69136	1.06054	0.7759	0.93396	0.71539	1.87124	0.84839	0.89207	0.75653	0.94947
1.04241	0.77257	0.8629	1.26643	0.86192	1.95794	0.86951	0.86608	0.8828	0.91334
0.75871	1.07111	0.78993	0.7923	0.63646	1.34452	0.98235	0.91369	0.54919	1.19701
1.5139	0.87707	0.78374	0.86061	0.62061	1.96384	0.82721	0.52414	0.46207	0.71579
1.49707	1.02018	0.73746	0.85023	0.52025	1.8701	0.88363	0.98711	0.73543	1.28412
0.90299	0.47767	0.74902	0.91975	0.92622	1.40693	0.85331	0.95701	0.58881	0.66397
1.13206	0.98702	0.90839	1.07374	0.85005	1.8569	0.8728	0.89298	0.23907	0.97786
0.81177	1.76326	0.88062	0.82858	0.71802	1.09026	1.00153	0.93313	0.77295	1.15496
0.99984	0.55976	0.74064	0.94007	0.73377	1.84744	0.87529	0.71692	0.56814	1.39598
0.95715	0.97871	1.12921	0.84967	0.78357	1.12417	0.97031	0.88743	0.82235	1.13205
1.14843	1.19684	0.90872	0.75897	0.70817	2.90459	0.91073	0.7638	0.67873	1.03499
0.95365	0.88355	0.86246	1.00222	0.98313	0.30595	1.21477	1.0147	0.39494	1.03682
1.01538	1.03495	0.92924	0.93349	0.76692	1.62942	0.89808	1.02756	0.51889	1.03197
1.06862	1.08275	0.68482	0.79112	0.81316	1.23836	0.77114	0.74688	1.49088	0.79657
1.14542	1.15835	1.06866	0.71454	0.70251	1.93203	0.85882	0.88726	0.43636	1.48184
0.99028	0.91742	0.8504	0.87946	0.73753	1.60741	0.66717	0.89551	0.63498	1.17113
1.07658	1.00972	0.83643	0.73193	0.70265	1.79653	0.9876	0.90022	0.67411	1.37088
0.99118	0.9644	0.8984	0.77937	0.79686	2.0435	1.01344	1.59833	0.61662	0.94024
1.00858	1.17756	0.79519	0.9424	0.52098	1.51741	0.93296	0.87078	0.64689	0.87026
1.14395	1.18134	0.70071	0.82495	0.87651	1.76771	0.88341	0.88067	0.56112	1.04302
0.99857	0.8805	0.91679	0.67113	0.708	1.49496	0.81514	0.90211	0.4812	0.90813
0.8089	0.57132	0.88576	0.92241	0.74525	1.77204	0.82874	0.75814	0.64533	0.70796
1.07911	0.89587	0.94817	0.74443	0.62037	2.81298	0.58457	0.86333	0.70924	1.06033
1.218	0.96751	0.85023	0.7457	0.57283	1.64673	0.93278	0.89427	0.67236	1.8632
1.0131	2.651	0.81921	0.64838	1.99802	1.85471	0.78362	0.88501	0.67001	1.13625
0.97958	0.624	0.65426	1.65541	0.74715	1.16853	0.7624	0.76926	0.59249	1.27172
1.23643	1.09858	0.90822	0.78639	1.19762	1.74499	0.81356	1.04341	0.92716	0.86707
1.09975	0.95362	0.84841	0.88753	0.78772	1.86735	1.01664	0.57047	0.62382	1.04402
1.09499	1.06896	0.78336	0.87443	1.83672	1.4701	0.90851	0.77191	0.60298	1.22547
0.71091	1.94756	0.93537	0.61844	0.75802	1.78642	0.97159	0.46048	0.53682	1.2013
1.10671	0.74435	0.86544	0.91667	0.89681	1.22023	0.77863	0.74206	0.76812	0.91176
1.16813	0.93639	0.82377	0.75982	0.73717	1.91059	0.75489	0.92417	0.62382	1.06256
0.88475	0.70245	0.90946	0.91469	2.27598	1.86172	0.89085	0.51051	0.60827	1.37003
0.9618	0.69649	0.97082	0.92779	1.59499	1.69036	0.66882	0.62192	0.69888	1.19653
0.97796	1.21851	0.78391	0.79196	1.04294	1.77572	0.86182	1.09932	0.61159	1.1361
0.73053	0.91787	0.87894	0.5919	0.45587	1.66878	0.90422	0.74376	0.65813	1.36897
0.99175	2.44389	1.11719	0.71783	0.74765	1.75945	0.87769	0.88687	0.72409	1.18552
1.08291	0.56848	0.82248	0.81039	0.6681	1.88781	0.843	0.94523	0.71662	1.50217
1.16072	0.99545	1.09119	0.68064	1.8049	1.8282	0.67983	0.85901	0.81332	1.09926
0.6134	0.83145	0.9	1.49888	0.88388	1.64912	0.94581	0.52457	0.68186	1.26276
0.96562	0.41871	0.96942	0.94216	0.82918	1.41257	0.95896	0.83623	0.93784	1.16099
1.11456	0.82818	0.75082	0.97832	1.1051	1.5727	0.83982	0.32653	0.55311	1.40424
0.84829	0.88498	0.86212	0.92953	0.79494	1.73458	0.97642	0.88654	0.52749	1.33485
1.10806	1.1646	2.10009	0.68717	0.75711	1.45976	0.58921	0.77615	0.4936	1.518
1.29032	0.82926	0.58843	0.66157	0.51018	1.47472	0.84244	0.77213	0.60484	0.84401
0.85913	0.77837	0.86831	0.61705	0.85546	1.54114	0.97303	1.08099	0.55136	0.97811
0.8825	1.04505	0.81081	0.71354	0.84488	1.79242	1.47135	0.86416	0.55855	0.9754
1.23705	1.08899	0.9621	0.85142	0.97636	1.83726	0.99364	0.66829	0.83227	1.10246
0.89	0.6303	1.00993	0.81616	0.59528	1.71739	1.29666	0.77192	0.54416	1.13622
0.76581	0.66334	0.81349	0.38578	1.732	2.28609	0.85731	1.10547	0.60614	1.42203
0.93091	0.87491	0.77125	1.59425	0.95817	1.28497	0.98597	0.94374	0.68636	0.70769
0.98409	0.65157	0.8485	0.59324	0.76469	1.62605	0.83546	0.87309	0.52455	1.33688
0.9205	0.9594	0.95357	2.72579	1.02495	0.95528	0.74447	0.88569	1.20813	0.81821
1.10943	0.6996	1.46648	0.85007	0.93578	1.63337	0.76096	1.01394	0.49349	1.07833
2.11813	0.84015	0.91745	0.74084	0.94348	1.63994	0.75008	0.8228	0.56758	1.19161
1.21853	1.0228	1.49347	0.87535	1.16723	1.43328	0.97132	0.9515	0.8981	1.08604
1.23399	0.71555	1.01836	1.0268	1.03927	1.66219	0.58817	1.04491	0.76496	1.38566
1.07711	1.00904	0.81559	0.7728	0.95093	1.72898	1.10365	0.81818	0.57913	0.54658
1.22356	0.78222	0.90479	0.65532	0.83442	1.74617	0.97898	0.59159	0.4274	1.04596
1.60972	1.05221	0.86255	0.64554	0.71422	1.66829	0.75939	0.72245	0.5796	1.12313
2.30016	0.8524	0.78514	1.18877	2.2444	1.07478	0.82457	0.91742	0.74691	1.09088
1.13516	1.62142	0.84584	0.95057	1.70217	1.2577	0.79637	0.86241	1.24347	1.15666
2.05305	0.9632	1.00079	0.62365	0.82395	1.7066	0.77745	0.87348	0.74827	0.77292
1.05243	0.98755	0.76662	0.81885	0.65534	2.70205	0.913	0.63825	0.42048	1.47718
0.82761	0.77481	0.82427	1.08378	0.65332	1.97243	0.68159	0.90651	0.60754	1.20188
1.23725	1.15931	0.73203	0.70208	2.21839	1.90689	0.67159	0.56941	0.78544	1.31862
0.91477	1.30435	1.13888	0.74169	0.64054	1.79278	0.89312	0.56565	0.34036	1.14528
1.35235	0.88823	0.6836	0.36407	0.85835	1.77344	0.80778	0.60644	0.59964	1.23298
1.09199	0.73472	0.73486	0.5783	0.78104	1.8159	0.99321	0.9322	0.64772	1.3173
1.01706	0.85647	1.44224	0.70465	0.60928	1.59825	0.87786	0.67079	0.38623	1.15994
1.15676	1.11666	0.71674	0.77438	0.68663	3.10844	1.45768	0.74319	0.89993	1.25542
0.71095	0.84599	0.96898	0.70187	0.90894	1.62941	0.86663	0.8275	0.31897	1.16988
2.11022	0.8141	0.98301	0.8386	0.75275	1.87472	0.83987	0.89805	0.23525	0.99317
1.11076	0.86515	0.95787	0.71296	0.61237	1.60923	0.78497	0.6004	0.78246	0.96293
2.09854	0.85179	0.88986	0.71877	0.93472	3.70227	0.81597	0.93412	0.56424	1.0434
1.15077	0.81093	0.80535	0.97452	0.74635	1.53003	0.68866	0.83814	0.66555	0.71006
1.19347	1.11229	0.71331	2.35525	0.59807	1.05238	0.56546	0.70641	0.75855	1.32286
0.83059	1.42678	0.90039	0.88659	0.92066	1.85878	1.02926	0.8647	0.76699	0.87354
0.84263	0.49172	0.91464	0.91536	0.68505	1.64646	0.89009	0.58356	0.65768	0.54281
1.35231	1.04402	0.9363	0.77014	0.82924	1.72285	0.93132	0.95089	0.66533	0.97695
1.15496	0.8481	0.88312	0.73032	0.67702	1.26064	0.67459	0.85423	0.87209	1.17996
0.55865	0.68624	0.82089	1.99709	0.87565	1.22918	0.56364	0.70464	0.72341	1.04752
0.96141	0.98697	1.45165	0.65198	0.74082	1.17691	0.9185	0.6234	0.56776	1.13389
0.91898	1.65374	0.67141	0.75012	1.87304	1.61767	0.83836	0.80778	0.5018	0.77309
1.0509	0.82431	0.90071	0.97082	0.88674	1.73392	0.89855	1.0824	0.74661	0.80997
1.00627	0.75876	0.62527	0.95269	0.83807	1.81221	1.34211	0.92213	0.78984	0.84409
1.05336	0.82274	0.89228	0.75729	0.80026	1.87672	0.57841	0.8772	0.79051	1.29284
1.46538	1.07651	1.01568	0.79649	0.83381	1.3541	1.1427	0.78638	0.63377	1.44479
1.17168	1.06451	0.4945	0.98861	0.71029	1.83333	0.90241	0.49666	0.41855	1.10885
0.96633	1.13411	1.00411	0.66437	0.65552	1.46547	0.94498	0.72114	0.64967	1.03491
0.99937	0.81134	0.83541	0.94289	0.5817	1.81513	0.9031	0.67381	0.64703	1.59458
0.98186	0.9555	0.83118	1.12793	0.68731	1.59828	0.91294	0.56952	0.70981	1.33709
1.17499	1.29195	0.94753	0.8291	1.25544	1.72588	1.979	0.8458	0.81795	1.10704
0.72701	0.66212	0.99764	0.67726	0.60046	1.70021	0.87737	0.71666	0.52936	1.43164
2.52423	0.91547	0.96832	0.97958	0.65641	1.87669	0.93187	0.98175	0.67161	1.01336
0.94578	0.81685	0.79424	0.91735	1.51648	1.80588	0.75768	0.98737	0.49713	0.99847
0.86412	0.72984	0.88949	0.64843	0.46146	1.70509	0.78937	0.63561	0.31275	1.32569
0.83277	1.04452	0.99755	0.72411	0.89376	1.82234	0.96287	0.88303	0.62341	0.83037
1.17834	1.12572	0.88426	0.87607	0.98568	1.54668	0.90783	0.59631	0.45554	0.96285
1.29045	0.73853	0.88796	0.54173	0.80235	1.4169	0.72206	0.96285	0.47327	1.0896
1.14385	0.72569	0.92834	0.8019	1.62346	1.67683	0.98443	0.8628	0.47152	1.66843
0.94475	0.78841	0.92397	0.87644	0.55814	1.88695	0.53149	0.80356	0.64047	0.91533
0.83848	1.05689	0.69236	0.91979	0.72846	1.83451	0.8833	0.67406	0.70024	1.12491
1.08123	1.09086	0.83314	1.0925	0.92814	1.5178	0.9246	0.7184	0.69081	0.92889
0.99227	1.17744	0.6541	0.89164	0.74583	1.25902	0.86963	0.96812	0.54684	1.14639
0.92863	1.51381	0.98373	0.88673	0.74828	1.67479	0.5914	1.03112	0.58583	0.8772
2.29607	0.7483	1.14773	0.64932	0.71314	1.85949	0.81032	0.73463	0.90805	1.1566
1.17727	1.35255	0.8019	1.84793	0.64736	1.78194	0.82325	0.97779	1.73156	1.26329
1.34943	0.83102	0.76977	0.75013	0.35413	1.46858	1.02752	0.65879	0.6392	0.76738
1.14296	0.94986	0.6901	0.70262	1.00461	1.10915	0.82544	1.00533	0.47074	1.04207
1.04807	0.84983	0.83068	0.8685	0.63248	1.78017	0.88471	3.17437	0.60706	1.0492
1.14436	0.85201	0.80932	0.72595	2.85097	1.47816	0.83311	1.02336	0.87231	1.25365
1.45167	1.0557	0.76293	0.83533	1.08154	1.61784	1.0202	0.81543	0.36497	1.03723
1.11407	0.83748	0.84485	0.98738	0.84626	2.03126	0.62139	0.7212	0.86483	1.29913
1.07578	0.83685	0.99984	1.04358	0.91095	1.74146	0.80523	1.29167	0.63008	0.51251
0.78431	3.05466	0.99066	0.72025	0.87347	1.60135	0.92454	0.97054	0.65675	0.92155
1.08057	0.7477	0.77671	0.81255	0.7089	1.51689	0.73585	0.75629	0.6607	1.53428
1.04473	0.96253	0.63395	0.82129	0.79273	1.79589	1.20423	0.72849	0.81059	1.15167
0.92428	0.82056	0.72724	0.85783	0.9103	1.75386	0.73741	1.17279	0.81067	1.1597
1.28617	0.87061	0.83161	1.63338	0.72857	1.78011	0.81726	0.76431	0.48779	0.83963
1.00903	0.83425	0.91245	0.84688	0.95684	2.04578	0.5848	0.94082	0.56358	0.89193
0.86259	0.82454	0.97379	0.78924	1.73294	1.59334	0.86125	0.82991	0.51722	1.32529
0.88812	0.76964	0.64718	0.8379	0.71543	1.51027	0.86971	0.82584	0.58151	1.27413
0.81927	0.87256	0.91108	1.6996	0.69613	1.80673	0.55897	0.64447	0.66035	1.07422
0.8716	1.85408	0.8683	1.25415	0.59842	1.7702	0.71808	0.74866	0.67895	1.02383
0.84352	0.93519	0.8913	0.74667	1.07824	1.77586	0.55788	0.72745	0.64446	0.89004
1.24888	0.99032	0.97954	0.67072	0.59366	3.99626	0.60179	0.98161	0.58108	1.32112
2.63087	0.86196	1.00709	0.64973	0.65224	1.52229	0.96442	1.0648	0.77192	0.9524
1.38826	0.8258	0.83602	0.80501	1.16126	2.00013	0.99639	0.80428	1.32483	0.66878
0.89469	0.8328	0.77654	0.92172	0.7953	1.53655	0.89012	0.63645	0.82518	1.18023
1.151	0.97668	1.05424	0.79434	0.79408	1.29112	0.46954	0.85895	0.85933	1.22292
1.1092	1.09648	0.7795	0.96434	0.76603	1.99114	0.70573	1.08397	0.6843	0.72812
5.23782	0.79116	0.47199	0.90539	1.07755	1.59445	0.74291	0.89097	0.75728	0.977
1.07175	0.90344	0.61198	0.84091	0.846	1.72479	0.80436	0.8468	0.77753	0.88932
1.15622	0.84097	0.85949	2.41853	1.07913	1.69346	1.39967	0.4446	0.49759	1.08676
0.94315	0.72541	0.88129	0.72894	1.5307	1.72916	0.78646	0.62914	0.55357	1.29437
1.87099	0.86037	0.93947	0.77939	0.82782	1.07641	0.89705	0.95498	0.73146	0.90987
1.09189	1.19072	0.83993	0.88885	0.87137	1.35388	0.83477	0.93653	0.6721	0.98195
0.93755	0.89517	0.93295	0.81009	0.83036	1.75	0.82871	0.78454	0.51507	1.50678
1.14334	0.91218	0.87246	1.17293	0.94334	1.28783	0.93031	0.83567	0.67099	1.12016
1.01593	2.03778	1.7888	0.74538	0.87464	1.9266	0.76604	0.96718	0.72891	1.02733
1.5819	1.56906	1.1121	0.41293	0.69838	1.87754	0.9461	1.03169	1.1826	0.73458
0.95942	1.83836	0.9391	0.71815	1.02689	1.79994	0.94107	0.80086	0.55282	1.37284
0.80651	0.72922	1.75339	0.67124	0.79006	1.46672	0.71247	0.99983	1.0509	1.14182
1.21911	0.78747	0.92495	1.43774	0.88627	2.08061	1.04437	0.81433	0.43153	1.10363
1.42928	0.81471	0.40196	0.7198	0.59322	1.85045	0.7617	0.94087	0.5401	1.21364
1.0698	0.89498	1.0074	1.12784	0.87793	1.72772	0.86509	0.78904	0.61785	1.2412
1.3015	0.81234	0.82498	0.71081	0.99144	1.82225	0.95619	1.03644	0.62578	1.13025
1.07824	0.95053	1.52413	0.57986	2.27152	1.83413	1.04271	0.87907	0.48408	1.0142
0.88596	1.12832	0.93503	0.60068	0.89667	1.41307	0.86719	0.92748	0.77977	1.29369
0.91204	0.83334	0.9274	2.4242	0.72275	1.66326	0.99569	0.79089	0.43905	1.16087
1.09073	0.84135	0.79191	1.38611	0.74578	1.53635	0.79634	1.00483	0.67397	1.10511
0.98838	0.80318	1.0014	0.63962	1.08959	1.91811	1.227	0.84834	0.57048	0.85757
1.3019	0.69271	0.9187	0.75453	0.77023	1.68983	1.5882	0.60387	0.54349	1.20247
0.95986	2.21165	1.66729	0.57477	0.68763	1.10648	0.5598	0.78028	0.51174	1.3848
0.84267	0.92644	0.95078	0.72915	0.9429	1.7009	1.07357	0.73924	0.70516	1.3127
1.05488	0.69361	1.35649	0.61009	0.76429	1.76145	0.9533	0.58802	0.66339	1.33864
1.08349	1.06587	0.83378	0.77548	0.69269	1.67898	0.8213	0.68777	0.5187	1.25768
0.91027	1.16116	0.72386	0.72442	0.89616	1.02075	0.87032	0.74461	0.57215	1.15344
1.03331	0.98669	3.2479	1.28351	0.93809	1.73691	0.88629	1.01673	1.15814	0.87647
0.79218	0.85549	0.82012	0.71829	2.16029	0.71148	1.27199	0.68607	0.60727	1.11044
1.43176	1.00295	0.82541	0.79769	0.61855	1.85619	1.09005	0.87952	0.71889	1.08035
1.25577	0.54854	0.91197	0.71994	0.61223	1.70789	1.09473	1.0452	0.68816	1.22405
2.13322	0.92063	1.03424	0.48584	0.93144	1.73195	0.68878	0.71438	0.61801	1.24046
1.55653	1.05821	0.78368	0.8241	2.52347	1.8375	0.85699	0.81936	0.79483	0.48215
1.42701	0.86129	0.9215	0.81076	0.7304	1.73225	0.71156	0.98071	0.51296	0.95966
2.35047	0.80479	0.87562	0.828	1.01718	1.46629	0.73534	0.83769	0.36513	0.9975
1.12671	0.39506	1.443	0.80761	0.92646	1.84655	0.57101	0.93275	0.83554	1.2349
1.07407	0.85366	1.00555	0.92927	1.07976	1.65812	0.8413	0.95239	0.636	1.15206
0.7582	2.65819	0.98721	1.08424	0.54186	1.16073	0.60652	0.71899	0.69847	1.60235
1.31169	1.0948	0.99443	0.88269	0.85061	1.38752	0.97119	0.95083	0.81617	1.22435
0.7401	0.86044	0.81368	0.71596	0.49688	1.1596	0.65585	0.85653	0.78337	0.72669
0.93283	0.60628	0.99138	0.68826	0.95056	1.63602	2.36457	0.19493	0.69249	1.1093
0.86673	0.83442	0.77906	0.54146	0.80807	3.28154	0.89701	0.52486	0.60586	1.09928
2.33317	0.86699	1.77196	0.84552	0.76211	1.8015	0.92427	0.37077	0.41797	0.86887
0.77875	0.84354	0.91063	1.03318	0.72023	1.49829	0.87827	0.99046	0.6448	1.12995
0.65314	1.0315	0.80869	0.63678	0.592	1.21263	0.69537	0.55438	0.7356	1.11004
1.17967	0.74573	0.83521	0.77555	0.65924	1.75352	1.02248	0.67305	0.64451	0.90561
0.9156	0.95134	0.89514	0.85835	0.47363	1.64771	0.7095	0.856	0.50324	2.8694
0.92463	0.58138	0.92246	0.866	0.83645	1.59874	0.81911	1.01481	0.73032	1.41367
1.13489	1.73835	1.18011	0.88748	0.73214	1.76804	0.82741	1.18294	0.89446	0.8085
1.1225	1.19732	0.7294	0.85464	1.8248	1.64474	0.78625	0.68029	0.82227	1.28094
1.27527	1.35717	1.00566	0.74712	2.01946	1.77515	1.01139	0.61037	0.88069	0.96411
1.02659	0.67258	1.04349	1.0033	0.34977	1.87669	0.84229	0.85215	0.77626	1.07959
1.13854	0.92114	0.83355	0.96873	2.13194	1.55395	0.92513	0.71639	0.3278	0.79067
0.92427	1.15716	0.8485	0.79699	0.67041	1.79545	0.88833	1.20067	0.73435	1.0408
0.93467	0.90478	0.78858	1.03074	0.64773	1.75531	1.11885	0.83915	0.39237	1.27478
0.99771	0.75324	1.19777	0.80845	1.08721	1.68905	0.72421	0.62407	0.70508	1.31399
0.85897	0.71703	0.84013	0.70852	0.90643	1.7802	0.61675	0.68747	0.80864	1.10864
3.08253	0.63609	1.03738	0.81833	1.38105	1.28925	0.6971	0.79789	0.78966	2.57311
1.3588	0.96663	1.02818	1.01022	0.67567	1.8001	0.85453	1.24456	0.91626	1.07502
0.92197	1.08951	0.96226	0.72942	0.80144	1.48413	0.78262	0.91605	0.86147	1.14067
1.3306	1.89326	0.84737	0.68287	0.88419	1.96414	1.60967	0.72066	0.45084	1.15088
1.6697	0.74122	1.06257	1.01162	1.91653	1.34876	1.10891	0.90384	0.53956	1.27772
1.17719	1.20309	0.95169	0.68951	0.82497	1.40832	0.60713	0.86123	0.61711	0.81203
0.97832	0.8037	2.08622	0.49337	0.60399	1.65857	0.8304	0.69774	0.76839	0.78111
0.76187	0.92408	0.91144	0.82592	2.66266	1.61993	1.08022	0.89502	0.5076	1.07297
0.99523	0.80074	0.76655	0.63131	0.42945	1.69652	0.85514	1.06284	0.68921	1.42343
1.00219	1.06902	1.02138	0.91888	0.6972	1.60869	0.94179	0.80484	0.50832	1.14858
0.75931	0.80219	0.90367	0.89328	0.81104	1.74253	1.17054	0.60268	1.4077	1.27492
1.22844	1.03478	0.89016	1.30036	0.92013	1.78063	1.13311	1.04974	0.56029	1.26079
1.16078	1.16356	0.96473	0.65907	0.7214	1.75708	0.81165	0.8858	0.60533	0.83456
0.98289	0.78351	0.81523	0.83242	0.8049	1.91972	0.83227	0.83609	0.40353	1.18135
1.17662	0.84878	0.9092	0.69436	0.6858	1.76307	0.72783	0.66911	0.67407	1.17172
0.80494	0.79893	0.94247	1.01206	2.09425	1.54749	0.7862	0.83702	0.84364	1.97235
0.92489	0.80278	0.89476	1.03814	1.39541	1.48301	0.95537	0.98459	0.43546	1.10403
0.73044	0.83452	0.71984	1.09013	0.65049	1.83606	0.76083	0.65733	0.41857	1.23513
1.28749	0.81937	1.02608	0.74769	0.72738	2.01027	0.74672	0.64582	0.57693	1.58911
1.19867	0.82889	0.86847	0.85718	0.88454	1.81687	0.92193	0.85582	0.80154	1.29022
1.06813	0.9503	0.85452	0.98088	0.87232	1.96995	1.05257	0.59967	0.67113	1.11978
0.93383	0.9226	0.58675	0.80364	0.64821	1.91633	0.63779	0.64008	0.69575	1.03501
1.15294	0.71976	1.01034	1.06715	0.70623	1.18485	0.59649	0.87768	0.73878	1.4362
0.75671	0.94619	1.36851	0.69688	0.82416	1.36233	0.92141	0.90836	0.65079	0.88282
0.90237	0.69555	1.12959	0.78718	0.82357	1.62763	1.5225	1.44064	0.79149	0.79348
1.80449	1.02678	1.17755	0.57852	0.65895	1.80716	1.29442	0.81053	0.647	1.40725
1.05257	2.05923	0.83001	0.8257	0.69464	1.97635	0.85249	0.80385	0.98759	1.82974
1.00692	0.70115	0.85259	0.83163	0.58581	1.89166	0.89299	0.86092	0.53318	1.42945
0.93316	1.13745	3.14019	0.92209	0.62286	1.69557	0.61729	0.47837	0.59817	1.4609
0.4771	0.86214	0.81145	1.08914	0.64878	1.22839	0.91487	0.88917	0.66169	1.0474
0.71971	0.87732	0.91612	0.77163	0.58408	1.75969	0.72535	0.84854	0.60548	0.84473
2.4024	0.8712	0.96813	1.34564	0.51341	1.85702	0.66914	1.36592	0.9416	1.11055
1.33987	0.90906	0.76376	0.68339	0.9172	1.62969	0.82225	0.92162	0.56988	1.05227
1.11881	1.00179	1.06299	1.42066	0.78581	1.7679	1.02042	0.73759	0.60282	0.95294
0.88142	3.58627	0.82972	0.46056	0.59994	1.53218	1.35118	0.73958	0.9868	0.93713
0.84373	0.93711	1.15007	0.97464	0.89017	1.67356	0.86283	1.00783	0.88038	0.97996
0.8372	1.00142	1.00137	0.73044	0.8175	1.67427	0.92692	1.10538	0.54002	1.31656
0.86422	1.06095	0.80758	1.64419	0.49341	1.72628	0.81519	0.3171	0.54463	0.95061
0.74016	1.16453	0.67859	0.90171	0.72008	1.76347	0.78391	0.93364	0.46528	1.36505
0.89509	0.92481	0.7965	0.68632	0.66472	1.94848	1.32253	0.833	0.76691	1.15203
1.08931	0.65459	0.89052	0.66439	0.53749	1.66896	0.78594	0.92131	0.4895	1.38072
1.14653	0.9987	0.71517	4.05316	0.6791	1.1796	1.56925	0.5956	0.39801	1.24566
1.09239	0.86579	0.9253	0.79997	0.92389	1.68374	0.64961	0.62377	0.98278	0.84463
1.14479	1.04539	0.88592	0.97678	0.8122	1.75527	0.95296	0.68626	0.52552	1.35182
1.2915	0.71263	0.79979	1.03416	0.74734	1.33144	0.76249	0.91333	0.7584	1.28578
1.07512	1.05493	1.0121	1.17778	0.52015	1.39096	0.87542	0.73382	0.83731	1.2542
1.16019	1.08456	0.88576	0.725	0.5851	1.82276	1.00145	0.77086	0.52501	0.93536
2.5281	1.34833	1.11928	0.83538	0.79045	1.92047	0.7684	0.40445	0.35323	1.12984
1.24378	0.80535	0.76626	0.95837	0.80762	1.72016	0.8161	0.95864	0.51652	0.79792
0.93766	0.91952	0.87922	0.93658	0.76879	1.63033	0.8327	0.86337	0.63921	0.90806
0.90988	0.86538	0.80665	0.67445	0.7236	1.58029	0.5581	0.76205	0.7969	1.63656
0.93221	1.06213	1.08562	1.02309	0.58788	1.8908	0.94602	0.8677	0.76633	0.73048
1.28331	0.87881	1.07733	1.01834	0.83414	1.81209	0.87472	0.48363	0.83429	1.26133
0.77423	0.54488	0.63902	1.06307	0.52811	1.58223	0.67239	0.81287	1.03211	1.28669
0.9554	0.53981	0.82804	1.89442	2.04151	1.76997	0.68705	0.77903	0.76283	0.78293
1.11558	0.7796	0.66384	1.74217	0.74854	1.66218	0.76789	1.18877	0.72992	0.91539
1.05712	0.97259	0.99285	0.59756	0.98824	1.57689	0.81826	0.99249	0.71894	1.22455
0.83065	0.92382	0.86623	0.79271	0.75416	1.88691	0.96306	0.93532	0.79419	1.39973
0.9295	1.10298	1.04058	0.8723	0.81899	1.47288	1.03793	0.45318	0.50886	0.88971
1.00249	0.77105	0.7856	0.63207	0.69131	0.63033	0.84271	0.90991	0.54333	1.15766
1.38746	0.93678	0.76855	0.84435	0.48896	0.92091	0.67797	1.04802	0.7426	1.42382
0.79895	1.11229	0.77091	0.74737	0.69851	1.68425	0.67953	0.94894	3.10188	1.03103
1.27484	0.76646	0.75833	0.9549	1.06854	1.70599	0.56374	0.69052	0.65272	1.33191
1.18926	1.07748	0.82815	0.67641	0.67424	1.4637	0.7573	1.17247	0.65626	0.70066
1.86793	0.54349	1.38357	0.6173	0.88195	1.13025	0.92306	0.41403	0.97815	1.17776
0.92781	0.83535	0.73521	0.8075	0.71111	2.13612	0.76218	0.93865	0.85828	0.96782
1.12625	0.84446	0.90936	0.87492	0.87768	1.74939	0.72028	0.57458	1.17241	1.00909
1.06299	0.90171	0.71067	0.72367	0.59143	1.7156	0.72239	0.95507	0.7582	1.29329
0.92792	0.86386	0.88358	0.83489	1.02712	1.78359	1.00767	0.83599	0.52096	1.49646
1.05109	0.82518	1.14012	0.56253	0.84592	1.50776	0.8311	0.83557	0.73608	1.13801
0.8445	0.774	0.82306	0.73857	0.75669	1.76436	0.84402	0.66527	0.78069	1.08131
1.71929	0.99843	0.95015	1.10337	0.77779	1.73867	0.97505	0.83227	0.74417	1.26184
1.19953	0.77972	0.81062	0.82804	0.93189	1.55623	0.84842	0.88263	0.95693	1.1052
1.06038	0.70284	0.73009	0.73309	1.05713	2.1835	0.70164	0.75121	0.55734	1.21878
1.23604	1.09829	0.89872	0.50558	1.96522	1.5734	0.52301	0.84664	0.74427	1.04525
1.44966	1.39482	1.09077	0.90646	0.80733	1.81829	0.77298	0.76019	0.88634	0.95074
0.89494	0.76354	0.73914	1.28299	0.68638	0.89711	0.92685	0.72213	0.6322	1.08499
0.95924	1.02959	0.73435	0.88684	1.12337	1.80649	0.16954	0.75711	0.84009	1.18285
0.65992	0.87335	1.01516	1.0787	2.2471	1.50527	0.82874	0.95634	0.56458	1.13494
1.19245	1.09988	0.85525	0.95616	0.69879	1.98924	0.58457	0.83744	0.66854	0.34528
1.15457	0.8656	0.9378	0.77487	0.75524	1.21709	0.65182	0.38488	0.88138	1.39557
1.0469	0.98722	1.05992	0.75049	0.6593	1.67506	0.81363	0.56151	0.68229	1.55342
1.59077	0.91483	0.86214	0.94357	0.73392	1.59048	0.77469	0.62116	0.63633	1.24944
1.00931	1.08103	1.09024	0.72896	0.8724	1.54104	0.82643	0.76518	0.77896	1.05947
1.1076	0.74505	0.84375	0.98067	0.90628	1.70437	0.72968	0.91783	0.53459	1.80779
1.17522	1.05344	0.82282	0.95413	0.73985	1.8384	0.78799	0.92932	0.54696	1.15894
0.90558	0.82179	0.75709	0.53599	0.57888	1.74553	0.93465	1.46565	0.58339	1.10156
1.11276	0.86489	0.93012	0.74219	0.91314	1.35482	0.64913	0.66644	0.63378	0.63975
2.04618	0.73967	0.81135	1.3762	0.65631	1.107	0.95349	0.98489	0.33455	1.43107
1.00093	0.88043	0.90142	0.85639	0.87703	1.92487	0.68963	0.97966	0.72329	0.97091
0.75069	1.17487	0.82419	2.48109	0.83582	1.68116	0.94626	0.8614	0.85881	0.94628
1.06335	1.23325	0.84791	0.70205	0.68226	1.76272	0.85754	0.91467	0.57685	1.15234
1.81955	1.82148	1.38248	0.8812	0.59293	1.72825	0.6182	0.8639	0.91571	0.86456
2.05909	1.78523	0.86188	0.7596	1.00905	1.52645	0.82347	0.965	0.7468	1.43635
0.77412	0.90472	0.84556	0.78318	1.26817	1.4488	0.96649	0.69023	0.63996	1.31855
1.10269	0.82525	0.81467	0.7484	0.80316	1.48116	0.72832	0.86698	0.70523	1.55098
1.12933	0.82812	0.8782	0.81134	2.20033	1.80814	1.00538	0.67793	0.68859	1.42501
3.18635	0.83692	0.6484	0.97545	0.50702	1.89627	0.78308	0.91158	0.53855	1.19333
1.28523	0.89401	0.84775	0.95358	0.95345	1.57993	0.84925	0.5802	0.47697	1.67199
0.97379	1.001	0.76485	0.94053	0.73276	1.94005	0.85582	0.63647	0.5567	0.9421
1.24295	1.09304	0.68704	0.68724	1.15412	2.11368	0.91927	0.71596	0.63156	1.48455
0.77187	1.05288	0.89148	0.64926	1.55862	1.89159	0.79552	0.92141	0.83875	1.52122
0.97483	0.73017	0.8645	0.8325	0.77286	2.06917	0.9012	1.02036	0.77244	1.52171
0.9905	0.81289	0.82034	1.01649	0.78383	1.38466	0.95028	0.85421	0.7933	0.73658
1.12952	0.91218	0.94358	0.8651	1.07174	1.49171	1.20124	0.91215	0.95253	1.18293
0.82891	1.22676	0.90974	0.91899	0.78197	1.88503	0.66391	0.82855	0.48905	1.14081
1.29649	1.33117	0.81775	0.97721	0.69775	1.68935	1.97742	1.05682	0.83487	0.73001
1.04084	1.12776	0.64814	1.06092	0.72372	1.89809	0.49107	1.02584	0.87941	0.80436
2.31909	0.98925	0.86584	0.74291	0.59953	1.80978	0.64591	0.67451	0.77102	2.63885
1.27345	1.00426	1.03182	0.70847	0.72647	1.75651	0.78615	0.85848	0.6667	1.39559
0.97509	0.81658	0.8228	0.96468	0.68927	1.46919	0.71192	1.28677	0.48385	0.72301
1.03536	0.7803	0.87307	0.84102	1.48602	2.01944	1.04501	0.88267	0.44935	0.7381
2.85522	0.85155	0.94048	0.93598	1.0812	1.70685	0.83873	0.55275	0.97904	1.31641
1.17211	0.78431	0.89215	1.04389	1.38992	1.65549	0.8715	0.74341	0.55508	1.24521
0.92548	1.43723	0.82189	0.69326	0.82386	1.80509	0.78975	1.43521	0.57182	1.43303
1.48427	1.06751	0.91174	1.01942	0.88933	1.4121	1.51041	0.96003	0.75366	0.88196
1.22571	0.93992	1.0067	0.83574	0.84841	1.83701	0.72522	0.77146	0.79077	1.12582
1.06598	0.88259	0.82848	0.83913	0.64812	1.74783	0.7831	0.80144	0.34573	2.63361
1.01862	0.93176	1.08322	0.96871	0.97669	1.87663	0.48311	1.03051	0.87111	1.15165
1.3859	1.05923	0.98964	0.79835	0.92333	1.67405	0.93056	0.75498	0.62142	1.05627
0.8863	1.15801	1.0244	0.88118	0.71069	1.49987	0.86006	0.69058	0.50126	1.06325
0.93578	0.81639	0.80519	0.68672	0.78372	1.79117	0.91096	4.0831	0.77903	1.05156
0.73974	1.36646	0.76503	0.86577	0.71878	1.297	0.84839	0.89064	0.84798	0.69299
0.84485	0.70332	0.71923	0.85075	0.96151	1.50116	0.59721	0.81126	0.55676	1.28765
1.01362	0.89264	0.92562	0.70358	0.85522	1.81327	1.16122	0.88264	3.4644	0.86255
1.08581	0.90986	0.9519	0.60925	0.86393	1.56833	1.09471	0.76562	0.80154	1.1498
0.61661	0.87256	0.87209	2.48215	0.55221	1.76872	0.99348	0.97191	0.14255	1.2056
0.8413	2.092	0.79955	2.43821	0.84688	1.66887	0.67815	0.81798	0.43723	1.4427
1.12352	1.06103	0.664	0.76723	0.6832	1.79965	1.52828	0.54161	0.61187	1.03189
0.84744	0.6273	0.77873	1.21039	0.54798	1.53039	0.81109	0.72803	0.65263	0.88901
0.9369	0.97483	0.75555	0.71747	0.30366	1.15628	0.94414	1.17502	0.70464	1.28571
0.89846	0.98992	1.25661	0.80126	0.41128	1.68789	0.69792	0.64054	0.80432	1.12306
1.08611	0.78006	0.83738	0.63761	0.78378	1.62793	0.97043	0.7481	0.89321	1.16482
0.94204	0.74893	0.76786	0.78905	0.78558	1.60132	1.10189	1.07038	0.47211	1.12968
0.89116	0.64774	0.87165	0.97035	0.8179	2.16512	0.9088	0.70934	0.64186	1.22366
2.51494	0.76142	0.94339	0.70424	0.47228	1.47929	0.77419	0.52375	1.05493	1.86421
1.048	1.16035	1.14332	0.79573	2.28654	1.32598	0.60476	0.88774	0.46462	1.63169
1.01429	0.81527	1.15123	0.81052	0.79736	1.56223	0.68953	0.69065	0.64523	0.94983
1.4166	0.87532	1.21056	0.82484	0.62568	1.89012	1.39337	1.07117	0.81708	1.38917
1.09044	1.77225	0.87087	0.84197	0.81363	1.90342	0.9016	0.964	0.50007	1.053
0.88594	0.88332	0.82672	0.9745	0.71764	1.72115	0.90318	1.02361	0.79655	1.2146
0.80971	1.01492	0.83539	0.84821	0.78875	1.52722	0.6743	0.47564	0.94477	0.67867
0.73003	0.59018	0.86265	0.85605	0.97409	1.93395	0.85586	0.67087	0.81573	0.93574
1.13849	1.21608	1.49026	0.99454	0.87125	1.65486	0.61925	0.79063	0.70986	1.21248
1.12989	0.7845	1.01292	0.79011	0.81536	1.57707	0.92316	0.55815	3.64537	1.04191
1.21738	0.86733	0.85636	0.59771	0.94981	1.90193	0.63826	0.87061	0.26358	1.50665
1.80723	0.63624	0.87059	0.85013	0.70133	1.64705	1.10173	0.62572	1.3282	1.37888
0.86211	1.36127	0.46431	1.03872	0.54858	1.7918	0.80259	1.09508	0.63075	1.43964
1.05254	0.87672	0.87244	0.90313	0.85529	1.49393	0.98541	0.74971	0.66551	0.87976
0.8412	0.91961	0.82453	0.88501	0.69455	1.53027	0.88493	0.92951	1.20098	1.34113
1.02167	0.96462	0.81119	0.84289	0.71205	0.81651	0.92835	1.03845	1.41091	1.13111
0.9926	0.97077	1.00333	0.78109	0.94942	1.4818	0.90916	1.01786	0.66013	1.22307
0.91907	0.84268	0.70648	0.7787	0.84792	1.748	0.39997	0.77383	0.69275	0.99487
2.30282	1.0284	0.52114	0.58325	0.76311	1.6714	0.99548	0.84523	0.69449	1.09696
1.12473	0.82396	0.85184	0.75966	0.72235	1.64168	1.06714	1.08282	0.65647	1.22192
1.11549	0.74857	0.87005	0.68007	0.85578	1.46301	0.91395	1.0092	0.60802	1.62192
1.30409	0.91667	0.78266	2.06867	0.97342	1.85777	0.85744	0.49357	0.73532	1.82887
1.03989	0.99076	0.67899	0.92779	0.79454	1.51153	0.72775	1.15044	0.21859	1.21708
0.97543	1.05949	0.85466	1.75759	0.70931	1.41688	0.86035	0.80365	0.61305	0.94891
0.9127	0.93847	0.82265	0.58184	0.70177	1.76584	0.61714	1.01057	0.46324	0.92229
1.12882	0.83955	1.82046	0.805	1.05193	1.82807	0.86803	0.89763	0.79718	1.01922
1.16377	1.00966	0.79071	0.89273	0.86268	1.70072	0.6281	0.66969	0.81968	1.24821
0.6917	0.57509	0.93268	0.7443	0.80884	1.81612	0.75424	0.77437	0.88922	1.28529
0.74438	0.71815	0.82421	1.40469	0.79915	1.84896	0.89603	0.71368	0.85377	1.49987
1.15442	0.93078	0.85571	0.67068	0.85981	1.76496	0.77061	0.92445	0.51049	1.00843
0.91309	0.67711	0.71354	0.77492	0.62302	1.8916	1.00241	0.9399	0.79207	1.00405
1.29099	0.78326	0.81761	1.28923	0.67749	1.10096	0.73759	1.13548	0.55049	1.02124
2.70322	0.80798	0.96577	0.94233	0.74383	1.74627	1.0119	0.60117	0.74866	1.02588
1.13044	0.99925	0.89332	0.65138	0.77877	1.48176	1.26976	0.6814	0.74256	0.5943
0.94824	0.62719	0.83222	0.84927	0.81437	2.21348	0.88302	2.28583	0.9582	0.98248
1.33527	0.91832	0.79198	0.91539	2.43371	1.51663	0.71014	0.89698	3.42009	0.62137
0.83598	0.99276	0.7774	0.71722	0.78557	1.80566	1.74722	0.73856	0.87199	1.35213
0.74624	0.88857	0.88942	0.74983	2.01648	1.90552	0.63763	0.43623	0.68013	1.05273
0.99206	1.03656	0.9586	0.77622	0.56968	1.3409	0.85293	0.73823	0.76857	0.84049
1.04856	1.60049	0.91765	0.72509	1.22741	1.48107	0.78456	1.00501	0.811	1.45794
0.78562	1.0546	0.85461	0.7449	1.13264	1.77877	0.52271	0.72493	0.60568	0.90657
0.89913	1.00437	2.07917	0.90159	0.93854	1.82869	1.08539	0.64755	0.62391	1.26813
1.00058	0.8893	1.06025	0.75515	0.61188	1.71421	0.68589	0.76515	0.90473	1.37949
1.33608	1.04032	1.04442	0.63067	0.56802	1.32576	0.61179	0.81653	0.55058	1.06791
0.86186	0.58554	0.69878	1.14493	0.76977	2.00217	0.62557	1.08334	0.51783	1.15843
0.79051	0.88008	0.99967	0.75681	0.67199	1.70372	0.86228	0.78662	0.7043	0.75435
1.06099	1.65373	0.81295	0.75038	0.70465	1.96726	0.66852	1.04078	0.48691	1.08186
1.0074	1.07857	0.97127	1.00599	2.23799	0.53243	0.85352	0.65512	0.84837	1.11785
2.08769	0.85606	0.89976	0.8468	0.81737	1.55403	0.82843	0.83081	0.65573	0.97132
1.18893	0.93741	0.95798	1.36848	2.14206	1.96399	0.75679	0.9593	0.65	1.38406
1.11246	0.86011	0.94165	0.76502	0.83035	1.05848	0.77828	1.25327	0.38548	1.15277
1.1818	0.82127	0.91669	0.67676	2.63094	1.60436	0.86552	0.64641	1.62439	1.08598
0.81841	0.60995	0.90836	0.72375	0.59198	0.86578	1.06616	0.87225	0.88945	1.1917
0.74871	0.63123	0.61169	0.74337	2.43631	1.55625	0.88902	1.00599	0.77821	1.33792
0.94824	1.00287	0.93092	0.74772	2.08402	1.81706	0.94279	0.84542	0.47484	1.65731
0.95183	0.88748	0.90247	0.67582	0.69906	0.81095	1.00963	0.76182	0.40354	1.28269
0.67036	1.06666	0.93272	0.67755	0.85515	1.86606	0.62977	0.99814	1.06125	0.83145
0.7904	0.71012	0.81045	0.60839	1.36343	1.7647	0.69892	0.72892	0.76225	0.79016
0.65721	0.77293	0.86951	0.91749	0.77833	1.44688	1.10086	0.6848	0.82249	1.153
1.02301	0.71498	0.89915	0.75829	0.6578	1.94893	0.77761	0.79255	0.58602	1.25125
1.09985	0.6906	0.94617	0.61656	1.99056	1.90504	0.74645	1.00426	0.89644	1.2367
0.90899	0.7966	0.87362	0.785	0.77887	1.64349	0.8214	0.78263	0.74313	1.03028
1.26573	0.94307	0.7734	0.98264	2.3738	1.94268	0.49994	1.18122	0.9338	0.74681
1.10352	1.05658	0.96973	0.57616	0.88143	1.406	0.77418	0.74065	0.87494	1.41802
0.99422	0.95411	0.71239	0.71739	2.20447	1.75225	0.8401	0.51518	0.62033	1.32611
0.97225	0.76884	0.8566	0.82282	0.72262	1.73807	0.91012	1.01592	0.75032	1.13609
1.05569	1.59516	0.88777	1.56757	0.61854	1.62831	0.7942	0.8399	0.857	1.22213
1.03452	0.89148	1.02393	1.51681	0.70754	1.3909	0.8786	1.04658	0.30988	0.86819
1.39989	1.057	0.88141	0.61761	0.8542	1.73727	0.65943	0.59622	0.73561	1.16493
1.07215	0.94965	0.90894	0.58927	1.80237	2.19154	0.8382	0.50066	0.92926	1.52959
1.08133	1.21197	0.85385	0.99468	1.02649	1.60928	0.8897	1.24779	0.77345	0.98543
0.92436	0.80482	1.27535	0.45694	0.71214	1.75932	0.63396	0.59068	0.70204	1.59681
1.04047	0.96455	0.81449	1.62035	1.12363	1.90415	0.24464	0.88503	1.08339	1.40686
2.64457	0.81522	0.61868	1.68252	0.80479	1.90317	1.03942	0.95347	0.71514	0.9298
1.03458	0.88847	0.78721	0.72116	0.8996	1.51666	0.84967	0.77868	0.91267	1.18801
1.06306	0.87165	0.99511	0.86288	1.35086	1.81567	0.7534	0.44875	0.6037	0.79286
1.11974	0.8863	1.88701	0.66098	0.8004	1.20818	0.8915	0.94147	0.53247	1.57383
0.91934	2.15736	0.66659	0.5038	1.70482	1.41393	0.89627	0.59317	0.61937	1.31146
1.04314	0.72683	0.96422	0.77547	0.78591	1.3079	0.75102	0.92628	0.69924	0.55737
0.68633	1.07311	0.83843	0.91054	0.76011	1.70098	0.70907	0.73804	3.25926	1.20991
1.06867	0.97429	0.96329	0.89431	0.80257	1.66947	0.90872	0.8283	0.73088	1.40317
1.30647	0.87203	0.63332	0.33464	0.80256	1.56439	0.6671	0.83488	0.71809	4.39052
0.94721	2.13893	1.00832	0.80041	0.90939	1.53257	0.9655	0.82501	0.55685	0.6827
0.93969	0.8937	0.91133	1.84205	0.85459	1.46089	0.91097	1.35106	0.9659	1.09875
0.7986	0.8024	0.81638	0.97997	1.67905	1.24388	0.77574	0.9634	1.12072	1.43018
1.00572	0.71117	1.12795	0.55719	0.72902	1.39226	1.21703	0.78478	0.67951	1.17983
1.13399	0.76075	0.88463	0.6951	0.75356	1.7264	0.60296	0.80773	0.66818	1.03314
1.02337	0.9613	0.85933	0.97435	0.73917	1.90028	0.97382	3.17372	0.73798	1.29809
1.15875	0.90846	0.68729	0.89773	0.8166	1.77846	0.84396	1.05716	0.73186	1.15849
0.96774	1.09198	0.81174	1.42012	0.87653	1.63473	0.72935	0.90483	0.78839	1.28098
1.1047	0.97877	0.81114	0.80139	0.77486	1.50327	0.29528	0.57112	0.7782	0.94394
0.95368	0.93724	0.92567	0.71886	0.73761	1.59663	0.80057	1.03209	0.4415	1.27078
1.1978	1.30237	0.86505	0.95613	0.77095	1.45874	1.20975	0.97512	0.7019	0.77868
0.97526	0.88915	0.98716	0.75827	0.67335	1.49267	1.44693	0.83961	0.70336	1.0746
1.08205	0.95557	0.74691	1.1822	2.322	1.96919	1.00736	0.5458	0.56145	0.98396
0.98424	0.85414	1.97574	0.72125	1.34477	1.77738	0.47239	1.08021	0.52342	1.27051
1.16951	1.29008	0.80822	0.9624	0.68962	1.34783	0.98933	0.87271	0.23309	1.12092
0.7264	0.74572	1.58661	0.67139	0.64384	1.77211	0.63397	1.14407	1.35504	1.14152
1.11771	0.90914	0.8708	0.94029	0.72027	3.01008	0.87921	0.96824	0.50677	1.51798
0.7228	2.32337	0.85897	0.76666	0.69799	1.74705	0.80318	0.6177	0.76961	1.15709
1.06487	0.90076	0.95099	1.5697	0.68342	1.79514	0.71768	1.08844	1.31613	1.09589
1.12119	0.54305	0.65031	0.85081	1.70918	1.64801	0.48788	1.20723	0.75512	1.39246
1.33299	0.84612	0.89871	0.81742	0.73603	1.78533	0.8084	0.84618	0.74484	1.13914
0.99867	0.81561	0.85712	0.71966	0.86681	1.69865	0.92778	0.76463	1.23562	1.13068
0.77621	2.35712	0.72348	1.00401	1.45192	1.56721	0.9138	1.17725	0.49679	1.26943
1.03403	0.99351	0.94955	0.67743	0.87935	1.17914	1.1889	0.57513	0.62016	1.19979
1.24236	0.92298	0.79401	1.62409	1.19031	1.65075	0.80446	0.82074	0.60168	0.81534
0.91692	0.8722	0.96287	0.71887	0.85301	1.48856	1.38822	0.94949	1.06029	1.40029
1.1589	0.97512	1.01011	0.67073	0.7449	1.65539	0.79385	1.11257	1.20821	1.07372
1.66455	0.67511	0.8522	0.70876	0.72911	1.87147	0.9348	0.3087	0.61935	0.98262
1.34465	0.90303	0.70659	0.85538	0.79043	1.56898	0.92021	0.7593	0.72814	1.20974
1.13486	1.03813	0.88475	0.76095	0.59849	1.58907	0.71553	1.00598	0.60282	1.20999
1.09492	0.84786	0.8594	0.65904	0.97987	1.9319	0.35274	0.9906	0.5408	1.46758
0.91576	0.73567	0.85879	0.8351	2.16189	1.61702	1.03769	0.93506	0.64393	0.99216
1.08867	0.7898	0.78373	0.91242	0.51578	2.02225	0.86646	1.0167	0.66353	1.0237
1.13922	0.915	0.92069	0.97471	0.79323	1.74807	1.27796	0.68684	0.75266	1.00002
1.23655	0.96358	0.83236	0.51791	0.84473	1.66218	0.80255	0.99036	0.70985	0.92822
0.94582	1.09037	0.95879	1.11285	0.69484	1.46488	0.87897	0.85377	0.86594	1.16137
1.2323	0.55073	2.12134	0.90246	1.4703	1.97288	0.87928	0.85299	0.51333	1.00298
1.25414	0.90216	0.95718	0.90177	0.68795	1.45106	1.05281	0.81776	0.55412	1.13085
1.27458	1.06522	0.84339	0.66144	0.85429	1.72289	0.99029	0.89714	0.82912	1.19076
1.05725	1.05417	1.12658	0.6746	0.71384	0.35006	0.4919	1.1347	0.57838	1.05952
1.19934	1.11566	0.99146	0.60833	0.80241	1.57179	0.72002	1.07188	0.50052	1.42302
1.06295	0.9847	0.93848	0.75612	1.06059	1.64291	0.84297	0.73002	0.60686	1.551
0.9542	0.9327	0.80465	2.23475	0.76401	1.52971	0.95072	0.67619	0.5035	2.12008
1.05678	0.82633	0.81755	0.59377	0.7608	1.62497	2.69101	0.95149	0.53919	0.96555
1.1056	0.64119	0.95015	1.15116	0.81575	1.44908	0.88713	1.10102	0.78233	0.99614
1.04594	1.39014	0.74739	0.5997	0.95059	1.59327	0.83572	0.90269	0.64433	1.11241
1.84081	0.88245	0.81355	1.50766	0.76818	1.38336	0.71185	0.61283	0.57035	1.02015
1.03675	0.77073	0.94362	0.89922	0.67861	1.58253	0.63099	0.72247	0.39799	1.24115
1.04069	1.02935	0.69344	0.98719	0.53497	1.74092	0.94921	1.30476	0.69324	1.1332
0.95657	1.40978	0.59059	0.8138	0.77482	1.63382	0.72744	0.61779	0.76416	0.98119
0.80073	0.69472	1.06007	0.65645	0.76312	1.75832	0.64245	0.57877	0.68169	1.28843
0.95617	0.74324	0.85697	1.03481	2.48422	1.51714	0.87456	0.69147	0.83499	1.22158
1.28211	1.04177	0.95035	1.02046	0.92369	1.83916	0.63767	0.60062	0.78785	1.56487
1.1628	0.88006	0.89118	1.00548	1.21891	1.69146	0.64508	1.00309	0.7279	1.39414
2.41841	2.77354	0.97102	0.72808	0.63306	1.53005	0.87236	0.89065	1.30886	0.88939
0.91007	1.30243	0.92099	0.84597	0.67588	1.60713	0.49925	0.73801	0.59182	1.30974
0.81946	0.76551	0.94717	1.12862	0.67435	1.85441	0.74928	0.91356	0.92609	1.14089
1.20538	1.51895	0.68145	0.87573	0.85582	1.32044	0.98443	0.77293	0.79191	0.99214
1.18725	0.84083	0.97406	0.81414	0.75756	1.81428	1.16263	0.8688	0.58117	1.17376
0.87319	0.64723	1.02202	0.59984	0.70673	2.19189	0.70526	0.85845	0.71716	1.33388
1.21013	0.96974	0.88681	1.04104	0.85454	1.80179	0.89262	0.96879	0.43185	0.46745
2.04543	0.94447	0.97782	0.9916	0.8481	1.41754	0.71428	0.67374	0.50562	1.00889
2.10586	0.8201	1.0078	0.64897	0.73783	1.62792	1.24153	0.91474	0.74958	1.53543
0.70287	0.72654	0.94511	1.01171	0.72929	1.80653	0.89609	0.69107	0.67697	0.96319
1.45447	0.97633	1.25103	1.07747	0.88868	1.01266	0.90682	0.57184	0.47254	1.31765
1.12158	0.80532	1.05579	0.91177	0.59861	1.05716	0.8627	0.73584	0.6227	0.98939
0.98987	0.93652	1.09398	1.77201	1.56851	1.68647	1.00335	0.95264	0.82664	1.02929
1.44908	1.13797	1.27651	0.9529	0.57452	1.6432	0.99417	0.52381	0.77918	1.72823
1.05468	1.05873	1.1122	0.9293	0.76723	1.41936	0.81368	0.6872	0.74899	1.23567
0.74773	0.99418	0.89009	0.71029	1.44233	1.81541	0.7151	1.17403	0.81775	0.72984
1.32736	0.82575	1.03193	1.09955	0.77253	2.49339	0.67648	0.87225	0.4498	1.19803
0.98246	1.62006	1.11669	0.69621	0.65518	1.73793	0.93164	0.62844	0.79342	1.14479
0.95997	0.97901	0.84734	0.99786	1.13213	1.68068	0.76304	0.7539	0.85046	1.33593
1.19954	2.18685	0.8596	0.42982	0.79078	2.07929	0.91914	0.87357	0.79414	0.95864
1.00844	0.99713	0.94754	0.73995	0.7794	1.78341	0.89127	0.66007	1.0609	0.81824
1.08207	0.89284	0.90212	0.7729	0.70835	1.62406	0.36055	0.7081	0.7479	1.24081
1.19302	1.04364	0.82739	1.01962	0.55737	1.30695	0.67255	0.66534	0.74461	1.28276
1.25849	0.95054	0.81721	1.80557	0.93703	2.01398	1.20238	1.13252	0.40478	1.23875
0.99002	1.37863	1.0355	0.76703	0.67553	2.03164	0.80471	1.17511	0.81514	0.82343
2.02701	1.00857	0.89108	0.51931	0.81766	1.27452	0.78859	1.04819	0.83442	1.04278
1.02616	0.89929	0.71772	0.77297	0.83967	1.9395	0.74893	0.80816	0.78939	1.47361
0.99046	0.85915	0.76783	0.61445	0.6117	1.64461	0.95096	1.01353	1.03105	1.04194
1.1093	1.243	1.01281	0.64697	0.73225	1.92356	0.80702	1.02545	0.84837	0.92712
1.08741	0.96632	0.92005	0.63569	0.67053	1.31221	0.69281	0.81306	1.14315	1.22209
1.02561	0.9253	0.90305	0.79628	0.63298	1.2701	0.75061	0.85938	0.84217	1.3184
0.91547	0.78531	0.77964	0.79267	1.25663	1.2632	0.75667	0.82418	1.27096	1.00957
0.81338	1.1703	0.99869	1.49039	0.7342	1.64695	0.94427	0.90383	0.66391	1.2381
2.46145	0.91341	0.91044	0.70171	0.73162	1.84312	0.78734	1.02699	0.5722	0.98807
1.14524	0.95274	1.04713	0.50364	1.42991	1.32634	0.81946	0.66224	0.7272	1.1631
1.0905	1.00685	0.87868	1.82179	0.95752	1.78996	0.90384	0.77499	0.65172	0.72341
0.69949	0.58069	0.9485	0.77205	0.69968	1.55985	0.87423	0.76336	0.43422	1.22699
0.98876	1.15375	0.85316	0.73272	0.89026	1.90408	0.85747	0.70875	0.24367	1.25618
0.61444	0.94319	0.90744	1.66563	0.60447	1.66472	1.12296	0.85333	0.89549	1.31986
0.94155	0.89644	0.85945	1.72936	0.82655	1.72015	0.98092	0.86141	0.43126	0.96673
1.14583	0.76177	0.87076	0.89742	0.51288	0.90362	0.98891	0.85947	0.77641	1.19881
0.8047	0.8666	0.8641	1.21778	0.8722	1.88696	0.75607	0.53641	0.68886	1.17925
1.01917	0.68802	1.08627	0.79837	0.85778	1.27766	0.77319	0.56506	1.09987	1.87985
1.07953	0.8666	0.9036	0.87472	0.56711	1.81702	0.48145	0.77963	0.71258	1.11569
0.98527	0.92701	0.84882	0.65054	0.8644	1.54768	0.36917	0.79788	0.92377	1.24261
1.14168	1.75857	0.92175	0.59561	0.80106	1.75739	0.89783	0.94083	0.62178	1.50939
1.12595	1.10423	1.02574	0.8357	0.80195	1.84994	0.92718	1.08838	0.75784	0.93056
2.20173	0.80481	0.8518	0.88271	0.86299	2.16073	0.47645	1.06053	0.6881	1.01144
0.80134	0.92923	0.86817	0.73378	0.80854	1.80182	0.80562	0.74964	1.05573	1.23147
1.01488	1.213	0.7901	0.92489	0.90712	1.14756	0.86823	1.09011	0.6974	0.95672
1.0681	0.89712	0.89368	0.96942	0.75143	1.82022	0.57418	0.87468	0.88988	1.35759
0.8317	1.18498	0.93246	0.78364	1.00723	1.44848	1.03385	0.61723	0.67858	1.07152
0.81014	1.09556	0.85299	0.85035	0.50696	1.97933	0.95192	1.01851	0.67381	1.15874
3.31161	1.03331	0.85387	0.71785	0.6773	1.76072	1.01477	0.89434	0.39568	1.38126
1.57815	0.88855	1.17654	0.94355	2.0301	1.86186	0.78337	0.81953	0.75889	1.14479
1.25888	0.99669	0.90227	0.81514	0.80589	1.85051	1.55484	0.95736	0.82204	1.19104
0.97495	2.34832	0.90258	0.92008	0.97584	1.68781	0.77327	2.80372	0.78978	1.19748
0.84312	1.03704	0.94512	0.71275	0.81508	1.62354	0.90508	1.01067	0.83463	0.84337
0.83008	1.08961	1.2083	0.73493	0.57654	1.68218	1.04104	0.76396	0.63931	1.33646
1.16573	1.18779	0.89353	0.82948	0.83033	1.8375	0.81117	0.90796	0.47029	1.07448
1.21255	0.84922	0.84986	0.81259	0.55557	1.75616	1.05435	1.00766	0.42851	1.02114
1.09934	0.92925	0.8355	0.90169	0.75763	1.71264	0.81429	0.61602	0.61111	1.22666
0.85002	0.87382	1.05745	0.8632	1.13258	1.50911	0.90409	0.83656	1.57848	1.28175
0.9246	0.96047	0.856	0.67073	0.84958	1.6981	0.59607	0.90454	0.81136	1.48261
0.87046	0.67571	0.68371	0.97203	0.84843	1.23754	0.55547	0.9427	0.51529	1.2014
0.76307	0.71823	0.91867	0.76918	0.66415	1.794	0.5499	0.79476	0.62846	1.00522
2.01532	0.72442	1.04719	0.60206	0.75755	1.946	0.87907	0.59868	0.65295	0.97106
1.18608	1.34643	0.9864	0.9075	1.12327	1.57216	0.58828	0.75742	0.43208	1.1109
0.94563	1.46236	0.72347	0.97881	0.77857	2.0375	0.72381	0.66069	0.42571	0.98706
1.73704	0.75084	0.76354	1.68266	1.12735	1.65376	1.10923	0.71837	0.70408	1.13193
0.87465	0.86024	0.95553	0.78694	0.68962	1.50294	0.84	0.86035	0.63538	1.33041
1.02074	0.6549	0.81537	0.70927	0.79352	1.75479	0.80385	0.66805	0.4971	1.12459
1.18178	1.03452	0.91157	0.88419	0.78636	1.74626	0.38387	0.93224	0.53371	1.07368
1.15278	0.85961	0.91333	0.94195	0.8074	1.60617	0.69468	0.86048	0.41226	1.11014
1.02894	1.04957	0.86849	0.83728	0.86899	1.64102	0.83152	0.57615	1.07497	1.16029
1.06973	1.89832	0.821	0.80431	1.04174	1.51734	0.96094	0.66946	0.61073	1.13056
0.85728	0.53401	1.12331	0.91655	0.71843	4.42155	1.19093	0.78583	0.75293	1.29664
0.95551	0.93606	0.5152	0.93894	0.92962	1.23864	0.86496	1.11283	0.43742	1.19744
1.20122	0.82143	0.83452	0.64909	0.66107	1.70529	0.72463	0.61321	0.75024	0.79139
2.40632	1.71161	3.14156	1.81426	0.73934	1.21969	0.73588	0.61073	0.87196	1.56425
0.70561	0.76211	0.78704	1.01119	0.82661	1.6082	0.73742	3.21026	0.68805	1.23799
1.04249	0.65311	0.94963	1.41048	0.85182	1.44972	0.88659	0.90262	0.70915	1.39552
0.89487	0.76124	0.8061	0.63606	0.65113	1.31919	1.29282	0.66715	0.36987	0.9678
1.21085	0.88848	0.5772	0.69544	1.19776	1.7558	0.7173	0.82881	0.4487	1.03817
1.02807	0.98473	0.93731	0.76499	0.85388	1.73505	0.91018	1.02156	0.75477	0.88209
0.91058	1.03131	0.84258	3.80722	0.86189	1.69044	0.8649	0.4288	0.95265	1.04158
2.19538	0.90784	0.76226	0.74558	0.68152	1.58582	1.58161	1.0619	0.37151	1.41155
1.9196	0.78082	0.90802	0.68141	0.50886	1.68477	0.98969	0.85506	0.7662	1.3551
0.97793	0.87141	1.81488	0.80702	0.7946	1.48084	1.18848	0.89354	0.6078	1.45292
0.95505	0.9739	0.9689	0.51983	0.8031	2.01956	0.87675	0.82108	1.36921	1.04908
0.93014	0.95055	0.89412	1.04292	0.72977	1.38588	0.94194	0.98632	0.69504	1.19538
1.15889	2.03057	0.83528	0.64419	0.78318	1.74227	0.85569	0.93361	0.61521	1.05046
1.10215	0.8829	0.90026	0.69629	0.98501	1.83271	1.16741	1.00612	0.90978	0.97068
0.74859	0.81102	0.57022	0.78533	0.78302	2.21509	0.92809	1.12405	0.731	1.0744
0.9865	0.7968	0.81816	1.05914	1.32486	1.65899	0.83976	1.69656	0.55497	1.38402
1.03456	1.12623	0.92231	0.79077	0.68922	1.83895	1.04497	0.3528	0.62542	1.54654
1.0439	0.79259	0.98144	0.87675	0.9062	1.67035	0.80738	0.91947	0.79717	1.66911
1.10788	1.02211	0.98307	0.69974	0.57445	1.83803	0.64953	1.06873	0.71042	1.42485
0.99604	1.02074	0.73678	1.61759	0.90554	1.14662	0.82801	0.64469	0.69429	1.26144
1.80439	0.9347	0.84412	0.86668	0.84005	1.62819	0.93885	0.84176	0.75071	1.37938
2.13276	0.92796	0.9055	0.8432	0.60725	1.15332	1.40346	0.99184	0.77072	1.1376
0.97991	1.06212	0.91281	0.62786	0.78103	1.79733	0.85333	0.91112	0.56805	1.14872
0.9249	1.87738	0.82266	1.85884	0.56081	1.46931	1.20775	0.78642	0.77081	1.26876
1.13914	2.42115	0.85227	0.99578	0.57692	1.86392	0.60304	0.64508	0.54435	1.59729
1.703	0.94987	0.9057	0.99863	0.77961	1.89022	0.55686	0.72736	0.75991	1.14268
0.95807	0.85793	1.21844	0.70845	0.97055	1.57626	0.79728	0.84166	0.49143	1.01049
0.68976	0.57548	1.02747	1.01383	0.59329	1.60089	0.68229	0.90735	0.87062	0.94291
1.09444	0.8566	0.75737	0.72318	1.18382	1.4266	0.81888	0.79743	0.70059	0.91319
0.85353	0.78084	0.83406	0.82561	1.04604	1.80837	0.83976	0.96128	0.52189	1.67965
0.68336	0.98888	1.10239	0.85679	0.77203	1.51512	0.83421	0.83424	0.56552	1.4058
1.26708	8.0981	0.93284	0.76254	1.00434	1.61917	0.90095	0.606	0.56844	1.30294
0.99564	0.95426	0.76911	0.69761	0.60562	1.67689	0.80894	0.78834	0.63731	1.12869
1.00945	0.89667	1.98716	0.69063	0.85381	1.72293	1.61391	0.87087	0.85254	1.12613
1.20963	0.91732	0.7613	0.90356	0.9149	1.56698	0.70916	0.69283	0.65923	1.35158
0.98477	2.47014	1.01682	0.84227	0.67382	1.77472	1.28206	0.98348	0.8126	1.10752
1.15234	0.72453	0.92456	0.81684	2.1377	1.45458	0.58114	0.70316	0.8665	1.27824
0.97874	1.07512	0.81087	0.60324	0.63782	1.6966	0.91948	0.78989	0.76278	0.72732
0.98611	1.09161	1.03735	0.86059	0.939	1.49833	0.84423	0.32939	0.49844	0.95473
1.5859	1.20685	0.91	0.96914	0.81859	1.8659	0.79348	0.61779	0.47792	1.04038
0.82619	1.12987	0.67822	0.80906	0.68536	1.09122	0.93106	1.04797	0.77637	1.1521
0.86748	0.95905	0.93613	0.69326	2.50815	1.54861	0.50508	0.82253	0.58049	0.88952
1.02622	0.56245	1.27999	1.2893	0.84211	1.67767	1.18572	0.95478	0.64109	1.40082
1.21478	0.74836	0.96123	0.93033	0.89769	0.99767	0.77679	0.89344	0.36816	1.06774
0.86078	1.07163	0.99828	0.85135	0.72727	1.67874	1.05187	0.82275	0.87004	2.25089
1.25773	1.0795	0.92237	0.84725	0.71681	1.8314	0.76694	1.00041	0.40363	1.22149
1.22216	0.72148	1.00984	0.96848	0.60053	1.069	0.69677	1.36246	0.69513	1.01248
1.19695	0.9968	1.02049	0.84441	2.36173	2.30207	1.02606	0.52405	1.02618	0.85032
1.00405	0.78347	0.84416	0.96448	0.77776	1.64698	1.03557	0.94851	0.74092	1.18212
1.7041	2.32195	0.91718	0.97804	0.7337	1.59325	0.90608	0.75847	0.61512	1.17851
1.05636	0.84805	1.02052	0.86356	1.4984	1.56109	0.77255	0.90406	0.6389	1.26613
1.31543	0.96582	0.95996	0.96466	0.64226	1.5372	0.90211	1.25839	0.94978	1.28649
1.0644	0.92559	0.73682	0.60489	0.54867	1.01155	0.81413	0.93716	0.79631	0.89302
0.7605	0.654	0.8332	0.89524	0.85228	1.69255	0.95698	0.98799	0.40821	1.28971
0.95559	0.75569	0.93823	0.74297	0.89456	1.96444	0.65041	0.94157	0.73896	1.18999
1.02574	0.77176	1.05852	0.93742	2.52216	1.86542	0.81594	0.85331	0.56008	1.03895
0.97685	0.91709	0.88497	0.86245	0.93593	1.76915	0.7372	0.5885	0.6896	1.15942
0.90522	0.66387	0.79283	0.90486	2.03407	2.0047	1.65536	0.82815	0.76783	1.10891
1.21388	1.00745	1.34324	0.81261	0.84605	1.15128	1.52623	0.62353	0.64461	0.83463
1.1845	1.10583	1.08828	0.93749	0.58948	1.60522	0.69408	0.8093	0.857	1.09388
1.14009	2.28777	0.86945	0.98455	0.96849	1.82957	0.84775	0.44321	0.65451	1.22034
1.11225	0.88875	0.69033	0.92525	0.73239	1.90212	0.6743	0.95571	0.92872	1.2067
1.05764	1.00012	1.65612	0.49589	1.78801	1.55359	0.82903	0.85802	0.98601	1.41595
0.78112	0.72125	1.6958	0.73652	0.73594	1.6851	1.00155	0.83397	0.74846	1.02459
1.59651	0.4305	0.80111	0.8879	0.59981	0.47535	0.831	0.85553	0.75263	0.86204
2.45919	0.73758	0.39887	0.894	0.77578	1.67395	0.65726	1.00095	0.53585	1.22674
3.96504	1.1808	0.79653	0.82137	0.77873	1.86163	0.77246	0.78997	0.68995	0.99463
2.32319	0.95841	0.95735	1.0513	0.71654	1.46779	1.86969	0.62995	0.82239	0.87995
0.87894	0.7366	0.86325	0.63811	0.94663	1.98467	0.5029	1.11775	0.85059	1.29637
1.0701	0.72654	0.70521	0.82371	0.6539	1.71913	1.05272	0.79704	0.66627	1.07748
1.18667	0.83785	0.91678	0.74706	1.31454	1.37877	0.78494	0.4961	0.80302	1.18427
1.27161	1.55182	0.95674	0.66721	0.81325	1.35954	0.93404	0.75718	0.59936	1.46859
0.83169	0.83504	0.85765	0.48626	1.11853	1.62048	0.90779	0.67192	0.78343	1.17971
0.89747	0.82378	0.91628	1.14912	2.39874	1.4873	1.31955	1.1118	0.49855	1.28708
0.88677	0.8515	0.92397	0.5174	0.59233	1.85203	0.84883	0.70927	0.6674	1.43848
0.97727	0.99395	0.71402	1.23216	0.49839	1.55762	1.05704	0.74058	0.50835	0.9688
1.07907	0.51801	0.78799	0.68343	0.83113	1.78267	0.79754	0.91372	0.71413	1.25519
0.80989	0.99556	0.88429	0.79493	0.56559	1.68042	1.60117	0.8614	0.5788	1.19937
1.16667	0.6465	1.01434	2.24091	1.86842	1.2041	1.07818	0.60618	0.65974	1.00882
1.09725	0.6707	1.01041	0.62608	0.92316	1.71093	0.80697	0.95879	0.63766	0.6617
0.7592	0.62711	1.01403	1.3315	0.66566	1.74014	0.63317	0.21325	0.83995	1.10217
0.88053	1.19931	0.75294	0.75943	0.98842	1.75946	0.78569	0.85254	0.80509	1.08216
1.16231	1.04398	0.88953	0.79377	0.72644	1.7998	0.87525	0.83793	0.35592	1.77349
0.87251	0.6578	0.77765	0.58619	0.67995	2.00643	0.86845	0.93229	0.92282	1.68964
0.96091	0.78383	0.93796	0.78746	0.98312	1.59852	0.96604	0.93351	0.6378	0.67892
0.93182	0.88166	0.66659	0.90581	0.7606	1.84885	0.98275	0.72473	0.90354	1.01625
1.03292	0.92668	0.74329	1.09048	0.97702	1.73209	0.70511	1.04593	0.74448	1.14747
1.10223	1.04226	1.0172	0.69552	0.65496	1.67843	0.80913	0.88161	0.1895	1.20194
0.74776	0.80145	0.81603	0.6926	0.84837	1.56826	0.83839	0.94454	0.44575	1.36132
1.27161	1.87727	0.89342	0.71117	0.67267	1.70451	1.13515	1.2245	0.83889	0.99161
0.84164	0.90476	1.19997	0.88101	1.44966	1.28297	0.92643	1.11116	0.6964	0.81685
0.92342	0.91992	0.90043	0.86126	0.93364	1.67473	0.52647	0.46068	0.44753	1.08549
2.40715	0.78466	0.90446	0.66246	1.73139	1.96471	0.54096	0.93039	0.78146	1.32408
0.88358	0.86457	0.95589	0.64996	0.66067	1.88883	0.8688	0.80666	0.73884	0.78871
0.98554	0.87263	0.93703	1.96609	0.88435	1.64323	0.82599	1.1688	0.88524	1.75212
1.09664	2.28031	1.27058	0.89384	0.95479	1.99796	0.75821	0.92684	1.14297	0.96493
1.55693	0.87518	0.98994	0.88933	0.8021	2.03123	0.71716	0.86648	0.29834	1.194
1.73448	1.08306	0.95527	0.77129	0.93964	1.43854	1.12241	0.84458	0.70162	1.08185
1.50621	1.08726	0.94689	0.92942	0.77481	1.84782	1.09004	0.76531	0.76377	1.21755
0.73557	0.4163	0.76986	0.69271	0.71847	1.50357	1.01501	1.12325	0.63625	1.58689
0.6677	0.81174	1.00699	0.86574	0.81333	1.5939	0.75071	1.046	0.52756	1.18902
0.87537	1.14721	1.82303	0.70499	0.79991	1.29112	0.35745	0.84031	0.64475	1.48341
1.23985	0.84734	0.88995	0.74469	0.89494	1.15498	0.64756	0.70081	0.66582	1.10673
0.61992	1.17947	0.88188	0.74643	1.54475	1.64644	0.6289	0.53086	0.69983	1.16547
1.25125	1.20408	1.17522	0.92607	1.87641	1.87305	0.68298	0.79375	0.69399	1.61769
1.63247	0.42468	0.91891	1.5458	0.51381	1.56274	0.75226	0.60793	0.99916	0.87703
0.70169	0.87892	0.95827	0.83163	1.11029	1.68329	0.56195	0.80738	1.16026	1.01335
1.57642	0.66741	1.55105	0.48435	2.0211	1.0639	0.98499	0.73657	0.84953	0.96252
0.69972	0.50485	1.62878	0.57124	0.86978	1.60797	0.92199	0.82059	0.57401	1.2303
1.61015	0.90712	0.88586	1.0423	1.33612	1.78114	0.74386	0.89617	0.88798	1.59089
1.14565	0.77715	0.72473	0.64715	0.69585	0.69446	0.84356	0.74785	0.87351	0.89327
0.7992	1.00358	1.02047	0.88274	0.77007	1.80095	1.26209	1.0709	0.43118	1.44092
2.10443	0.76681	0.89126	1.06847	0.85722	1.36664	1.2113	0.9868	0.65059	1.3288
0.94106	0.76541	0.94104	0.84648	0.79581	1.69664	0.84692	0.76972	0.63127	1.19073
1.35886	0.84951	0.60721	0.69493	0.57244	1.59564	0.74248	0.88364	0.7671	0.86437
1.19881	1.11415	0.75495	0.85467	0.86614	1.66794	0.79883	0.59878	0.85875	1.10701
2.39547	0.98029	1.01161	0.69925	0.75715	1.81044	0.50616	1.20886	0.74298	1.23719
0.9514	0.99888	0.77458	0.40526	0.91697	1.32331	0.89942	0.92977	0.75799	1.03096
1.08248	1.0825	0.92853	0.98687	0.46132	1.68346	1.05794	0.88057	0.86198	1.62431
1.04402	0.86523	1.12474	0.71646	0.85186	2.0885	0.23309	0.66442	1.2234	1.001
0.94287	0.85629	0.96285	1.52427	0.73165	1.78205	0.90839	0.79533	0.583	1.18378
1.08708	1.00802	3.08238	1.34695	0.73814	1.7624	0.775	0.81124	0.91209	1.37206
1.15551	0.61585	0.8525	1.41176	0.93557	1.75663	0.77396	0.63025	0.66334	1.26963
1.2704	0.92825	0.91019	0.72988	0.86328	1.74773	0.93079	1.13005	0.79097	1.21156
1.88571	0.7599	0.92903	0.81831	0.59258	2.62307	0.69989	0.86716	0.53212	0.60708
1.07682	0.90992	0.94756	0.79651	0.5305	1.15966	0.57558	0.7931	0.63223	1.41078
1.0629	0.4864	0.93721	0.89171	0.78453	1.40738	0.86631	1.96549	0.57381	1.26398
1.04084	0.8603	1.00815	0.88405	1.87879	1.74888	1.25127	0.6539	0.92911	1.34751
0.81648	0.85928	0.83357	1.14818	0.68943	1.8794	0.97092	0.87098	0.84386	1.05224
1.01575	0.79062	0.83338	0.75752	0.66664	1.76121	0.92042	0.29002	0.63733	0.89632
0.7222	0.86931	0.97585	0.75989	0.7983	1.85288	0.71299	1.71238	0.64675	1.21267
0.88904	0.90496	0.82192	1.57574	0.83557	1.55632	0.84649	0.786	0.48996	1.25696
1.25253	1.02716	0.93479	0.73192	0.64708	1.53382	0.92816	0.79215	0.93485	1.41596
0.70147	0.66396	1.04062	0.71726	0.97198	1.42924	0.70212	0.78018	0.56961	0.90043
0.99162	2.27869	1.01222	0.54799	0.76028	1.5766	0.60602	1.00807	0.9029	1.45124
0.73637	0.8246	0.85757	0.78269	0.51965	2.84879	0.70659	0.6748	0.76118	1.11782
0.90139	0.76362	0.87809	1.05106	1.02515	1.65107	0.92086	0.88234	0.4707	0.97047
1.42106	0.72358	0.74551	0.86601	0.66401	1.92924	0.76102	0.93734	0.66562	1.60783
1.31739	0.91818	1.72209	0.93377	0.75304	2.20888	0.68741	1.02579	0.80375	1.16032
1.1246	0.72949	1.10043	1.26589	3.10567	1.62171	1.08197	0.86698	0.72093	0.98797
0.79848	0.92311	1.05185	0.7939	0.72615	1.7307	0.72521	0.62944	0.60162	1.19394
0.65576	1.04169	0.72261	0.72384	0.75682	1.76177	0.76526	1.19766	0.35164	1.07534
1.44763	1.00888	0.979	0.77373	0.9636	1.51553	0.73179	0.97486	0.77644	1.01651
0.62921	1.23699	0.83959	0.78482	0.70994	1.83212	0.9895	0.79629	0.45767	0.97318
1.27739	0.99806	0.83612	0.7884	0.72828	1.34244	0.74341	1.06395	0.52626	0.67805
0.76814	1.07815	1.01998	0.69635	0.75078	1.6832	0.92676	0.91761	0.76522	0.95379
0.98904	0.98857	0.82851	0.89003	0.84037	2.02623	0.68061	0.89887	0.77665	1.0253
0.94376	0.95283	0.87259	0.9194	1.00178	1.65723	0.75335	0.55847	0.8158	1.06189
1.04292	1.05542	1.02275	0.89618	0.81388	1.84376	1.24183	0.92136	0.59681	1.05629
1.91083	1.18876	0.95761	0.90036	0.79728	1.69679	2.30028	1.07568	0.61212	0.38281
0.86558	0.84105	0.87486	0.64059	0.7342	1.73289	0.75725	0.69785	0.83809	0.73297
1.06515	0.75992	0.88925	0.82746	0.7608	1.60153	1.28982	1.0749	0.92232	1.17391
1.09794	0.50741	0.73624	0.67317	2.34232	1.47433	0.8178	0.92321	0.49571	1.2219
0.61159	0.79203	0.77842	0.94223	1.94494	1.67624	0.9173	0.86897	0.64495	1.16143
1.18431	0.82161	0.54489	0.83299	0.76959	1.37088	0.87024	0.92871	0.69601	1.30119
0.80241	2.82798	0.74521	0.72183	0.73891	1.42497	0.85657	0.94451	0.5138	1.23342
0.95784	0.77097	0.90916	0.75438	2.25106	1.79158	1.20985	0.97273	0.44905	0.89664
1.06831	0.92063	0.80717	0.74939	0.81036	1.77429	0.89529	0.55495	0.67781	0.82611
1.33645	0.73224	0.75706	0.97469	0.8346	1.29301	1.10783	0.62074	0.90906	1.31801
0.83824	1.08226	0.81447	0.54189	0.7763	1.29603	0.7752	0.63896	0.74696	0.99299
0.86529	2.15451	0.49372	1.61337	0.89491	1.65932	0.87959	0.83825	0.79799	1.22291
1.03041	0.88594	0.98464	0.90019	0.84938	1.26869	0.71903	0.915	0.68724	1.11015
1.0179	0.88744	0.8211	0.89207	0.85897	1.75155	0.64532	0.361	0.80867	1.66836
2.3243	1.71901	1.08552	0.80884	0.83241	1.67891	1.12755	0.81871	0.62771	1.07036
1.21342	0.92056	0.63561	0.65558	0.54329	1.89258	0.81853	0.80352	0.79995	1.85243
1.07108	1.03533	0.80172	1.1824	0.55346	1.74188	1.06193	1.01845	0.66818	0.99929
1.09415	0.5843	0.87968	0.98994	0.71698	1.93892	0.87139	1.10816	0.74329	1.30774
0.99354	1.05676	0.82611	0.57027	0.66827	1.38733	0.82122	0.8198	0.5677	1.2025
0.80611	1.16466	0.86213	1.75886	0.58737	1.69639	1.03435	0.485	0.60019	1.32383
0.92124	1.99323	0.85865	0.9863	0.92874	1.90379	0.84012	0.81415	1.00964	1.12727
1.02358	0.8414	0.652	0.71721	0.66428	1.86824	1.04423	1.17551	0.34316	0.92562
1.11334	1.08845	0.96818	0.88449	0.73971	2.08185	0.65116	0.86835	0.63527	0.98641
0.91099	0.97382	0.88826	1.16959	0.82089	1.46744	0.97994	1.02456	0.84731	1.16521
1.14454	0.9512	0.93327	0.70627	0.78121	1.50306	0.59533	0.8008	0.93663	1.32224
1.00463	2.17568	0.92173	1.1916	0.64673	1.88632	0.67186	0.67845	0.61384	1.23142
0.88314	1.08779	0.94054	0.78305	0.52333	1.77768	0.62007	0.7942	0.55657	2.69122
2.38849	0.74514	0.54961	1.67884	0.85662	1.71569	0.89103	0.8956	0.4975	1.35218
0.99555	0.83872	1.06194	0.78328	1.48114	1.9002	0.87264	0.5108	0.90046	1.34145
0.89422	0.85551	1.00376	0.9014	0.81243	1.86296	0.85869	0.80698	0.68259	1.12368
0.70489	0.82404	0.67407	0.95748	0.63322	1.94665	0.90249	0.91686	0.73493	1.47735
1.9209	0.89106	0.89558	0.9044	0.68467	1.25143	0.9862	0.76437	0.73115	1.12996
0.99935	1.03406	0.89534	0.68486	0.70149	1.55236	0.79843	0.98099	0.87426	0.86934
1.08574	0.96566	0.73814	0.74823	0.90376	1.47095	0.44773	0.90559	0.58528	1.38175
0.80019	0.72773	0.96812	0.77557	0.50237	1.35363	1.35367	0.7774	0.59534	1.3035
1.38521	0.84398	0.84707	0.64251	0.83073	1.62033	0.85901	0.86904	0.79813	1.0547
0.75635	0.86681	0.82065	0.85326	0.70852	1.87399	0.82489	1.06643	0.78299	1.11851
1.03062	2.0536	0.83971	0.75265	0.71802	1.90728	1.0605	1.29479	0.86531	1.08437
4.01441	0.82933	0.51931	0.92592	0.82807	2.22089	0.81132	1.27712	0.55415	1.1143
0.92332	0.75614	0.78323	1.21758	0.86532	1.85256	0.48557	0.39136	0.63103	1.20933
1.01864	0.96431	0.72327	1.1779	0.73156	2.08177	0.79251	0.7036	0.68451	1.18672
0.89898	0.71968	0.97242	0.79569	0.68875	1.3124	1.07548	0.94145	0.51641	1.1175
1.06766	1.0291	0.76306	0.69149	0.79545	1.3086	0.73552	0.75103	0.45783	0.85484
1.33837	0.84156	0.98016	0.96546	0.52425	1.60185	0.711	0.46963	0.68295	1.27871
1.25176	0.86392	0.95529	1.32273	0.71017	2.12446	0.74438	0.81343	0.74273	0.97107
1.09336	1.23133	1.13972	0.89804	0.8311	1.53723	0.95132	0.73954	0.74603	2.77687
1.08281	0.95025	0.93575	0.72986	0.66269	1.66782	0.52378	0.66643	0.73714	1.10816
0.65152	2.13437	0.76108	1.00852	0.62556	1.23338	0.73254	0.71569	0.85357	1.32944
0.96413	0.83572	0.80532	0.96005	0.79556	2.91589	0.78841	0.75588	0.71069	0.8502
0.95948	0.83192	0.6435	0.7676	0.83023	1.7701	0.78985	1.56096	0.67519	1.12038
1.30283	0.92582	0.65048	0.64851	0.79898	2.20093	0.8734	0.82718	2.19961	1.32157
1.09992	0.82343	0.91556	1.37275	0.72182	1.66674	0.84531	0.46803	0.58448	1.08691
1.36411	0.8665	0.75739	0.83885	1.4114	1.62036	0.69745	0.79733	0.83794	1.10886
1.19021	0.72029	0.97095	0.61239	0.54245	1.67831	0.8096	0.95398	0.5202	0.80435
0.94963	0.59422	0.90934	0.74875	0.6381	1.91274	0.69648	0.91289	0.67046	1.63302
1.27646	1.01624	0.87955	0.7848	1.262	1.88202	0.37043	0.63673	0.61853	1.05862
1.07168	1.02687	1.04665	0.95355	0.51352	1.61804	0.88791	0.86114	0.89182	1.16372
0.91256	1.3701	0.80939	0.9396	0.53839	1.71543	0.81651	0.98452	0.87534	0.98721
1.10401	1.02244	0.80743	0.76303	0.74028	1.86521	1.15835	1.22874	0.45818	0.8306
1.42708	0.87272	0.49375	1.9454	0.98595	1.82051	0.76059	0.64542	0.78049	1.66373
0.94606	0.71725	1.01367	2.75691	0.87814	1.91934	0.89901	0.81863	0.66757	1.95208
0.84105	1.20569	0.85272	0.63378	2.13898	1.75957	0.8718	1.05687	0.49772	2.25451
1.71924	0.97552	0.89452	0.62463	0.75535	1.76214	0.82337	0.97869	0.94766	0.91066
1.80496	0.96837	0.88756	0.71417	0.75011	1.53959	0.83498	0.91259	0.92858	1.37879
0.88002	0.82766	0.86493	0.89318	0.73237	1.67909	0.89339	0.78563	0.67134	1.13153
1.07306	0.466	0.98921	1.68218	0.61326	1.76095	0.97542	0.7536	0.54226	1.07654
0.65984	0.8841	1.07613	1.06084	0.87135	1.44622	1.06271	0.97638	0.38347	1.31369
0.88041	0.99315	0.93074	0.75872	0.7345	1.83931	0.87797	0.87198	0.87224	1.17105
1.11141	0.91496	0.86932	1.16486	0.81148	1.86325	0.72232	0.94308	0.28927	1.2742
1.16331	0.65914	0.8723	1.51549	0.8595	1.58201	0.59638	0.79847	0.57276	0.93699
0.97089	0.83569	1.05388	0.77535	0.77282	1.30389	2.00056	2.22553	0.58912	1.16602
0.77816	0.99537	0.82545	0.80221	0.87386	1.79269	0.80387	0.83845	0.38861	1.01605
1.26907	0.81628	0.93026	0.67391	1.93202	1.93733	0.90939	0.76663	0.7327	1.09262
0.90525	1.07479	0.98785	0.80128	0.54389	0.77328	0.82132	0.80508	0.52438	1.14543
0.7348	0.87179	0.98077	1.39881	0.91581	1.45594	0.88352	0.80707	0.7663	1.03845
1.0074	0.77384	0.86995	0.68353	0.78602	1.6321	0.79574	1.1247	1.75526	1.08326
0.88975	0.93417	0.78691	0.87558	0.78276	1.19753	0.78873	0.9052	1.0117	0.89961
2.04042	0.90857	0.8522	0.38191	0.64926	1.44841	0.52838	0.80065	0.78883	1.38302
1.23666	1.07635	0.91207	1.35463	0.65902	1.26791	1.01166	0.95285	0.41128	1.34177
0.69308	0.97687	0.87786	0.80125	0.47119	1.82657	1.22143	0.95564	1.14102	1.44768
0.88917	1.05967	0.74241	0.94682	2.30234	1.84949	0.87317	1.23842	0.67828	1.09186
1.23633	0.43283	0.97856	0.72053	1.91175	1.4574	0.89537	0.99536	0.60382	1.21835
1.11634	0.91951	1.0407	3.19825	0.75606	1.62811	1.25735	1.15722	0.82124	1.5234
1.20113	0.92845	1.03767	0.84365	0.60552	1.79404	0.67693	0.75509	0.53347	1.41409
0.99194	1.73446	1.00163	0.99428	1.048	1.84921	0.85297	0.65496	0.56171	1.32917
1.0979	0.3232	0.72517	0.60181	0.71917	1.63509	0.9267	0.80878	0.79219	1.28619
1.06082	1.33431	0.27847	0.78519	0.89946	1.35557	1.21271	0.76227	0.71	1.05132
0.69078	1.31434	0.75188	0.82749	0.73314	1.65407	0.8994	1.11326	0.66853	1.32521
1.10835	0.79705	0.7915	0.58422	0.80243	1.69895	0.84381	0.84459	0.8387	1.18345
0.75802	0.8653	0.46688	1.06103	1.49898	1.12775	0.50341	0.78292	0.98588	0.69174
0.94324	1.25155	1.427	1.46303	0.80699	1.51168	0.74252	0.92183	0.73382	0.97314
1.07137	0.93204	0.79566	0.86578	0.786	1.76518	0.67397	0.91544	2.23434	1.52297
1.00537	1.19005	0.85618	1.0565	0.69348	1.84544	1.13249	0.67962	0.76027	1.01241
0.98827	1.10384	1.31393	0.8484	0.65104	1.92524	1.12649	1.06342	0.82106	0.9662
0.72068	0.82727	0.82188	0.72761	0.75544	1.37861	0.85753	0.56119	0.47771	1.66268
0.95321	0.88066	0.98709	1.07517	0.65613	1.67957	0.71031	0.96019	0.66214	1.50048
0.90446	0.91081	0.7997	1.14699	0.60309	1.74742	0.62635	1.10407	0.5147	1.13062
1.50086	0.7954	0.98826	0.90695	0.58019	1.5851	0.98777	0.7209	0.67338	1.10353
1.66062	0.92961	0.87544	0.71436	0.78389	1.26664	1.07348	0.64665	0.79879	0.84647
1.03128	1.13277	1.74032	0.73809	0.80669	1.58168	1.01844	1.12757	0.62417	1.48288
0.85888	0.98784	0.89283	0.9928	0.91379	1.6676	0.88679	0.49755	0.90977	1.40307
0.90764	0.60466	0.92318	0.78458	0.68532	2.0843	1.00016	0.7606	0.72355	1.16194
2.65847	1.00997	0.70661	0.78939	0.63579	1.81681	0.85183	1.08403	0.77664	1.21562
1.17874	0.98857	0.81209	0.81655	0.71183	1.64892	0.49067	0.75888	0.68194	0.88912
1.18931	0.86256	1.24693	1.14727	0.40442	1.92227	0.54147	0.75194	0.64656	1.35348
1.1146	0.86844	0.80387	0.68672	0.75179	0.96255	0.84495	1.16955	0.5763	1.46616
1.28959	1.12497	1.01459	0.70766	2.07264	1.27189	0.81316	0.6877	0.67671	1.24699
0.84252	0.94439	0.80278	0.74899	2.04184	1.78617	0.78931	1.17798	0.64607	1.10021
1.08727	0.91155	0.7304	0.73025	0.69879	1.93548	0.4488	0.66618	0.75498	0.66179
1.06603	2.43578	0.85468	0.98939	0.77905	1.35479	1.03924	0.83904	0.72443	0.85007
1.10718	0.81044	0.64507	0.75949	0.82242	1.71289	0.94401	0.73666	0.90932	1.228
1.01911	1.06813	1.00559	0.61529	0.93512	1.81011	0.91792	0.69637	0.74735	1.31927
1.22937	0.77642	0.7019	0.94195	0.76588	2.17198	0.60568	0.7964	0.7575	1.06157
1.24341	0.98447	1.22296	0.83808	0.53774	1.86253	0.97113	0.84696	0.77235	0.85598
1.02449	0.8559	0.98555	0.85515	0.9076	2.09891	0.58729	0.74687	0.85463	0.965
1.5272	0.95493	0.33461	0.67059	0.70076	1.82487	0.74366	0.98359	0.68402	0.68871
1.26	0.86314	0.97675	0.70645	0.69139	1.96404	0.80544	0.9835	0.86381	1.10261
1.10776	1.05889	0.91573	1.18187	0.89299	1.59374	0.97122	0.83281	0.52514	0.80325
0.99235	0.88846	0.90319	0.50989	0.65973	1.79686	1.0629	0.68668	0.6601	0.88766
0.81865	0.86076	0.85385	1.64262	0.76216	1.99198	0.86809	0.79954	0.78069	1.04554
1.12875	0.56563	0.77287	1.00836	0.74781	1.5174	0.91496	0.95017	0.45478	0.97948
1.11434	0.67474	0.89677	0.97685	0.6288	1.77228	0.50384	1.03607	0.67929	0.70738
1.76182	1.0535	0.82991	0.64907	0.5786	1.91309	0.76297	1.13177	0.85196	1.16441
1.12212	0.80953	0.88737	0.88339	0.73857	1.32575	0.7298	0.79976	0.58568	1.00894
1.04132	1.01709	0.77185	0.63812	0.63374	1.85707	1.5363	0.84926	0.45159	1.19465
0.98416	0.93003	0.79594	0.55902	1.16719	1.79478	0.87398	0.65046	0.76856	1.36
1.05293	1.40768	0.81671	1.32421	0.74745	2.02414	1.02852	0.93054	0.59325	1.02619
1.09361	1.39214	0.84669	0.56248	0.80105	1.67902	0.87422	0.61084	0.61573	0.97635
0.93723	1.00643	1.12276	0.79034	0.98298	1.11278	0.70592	0.82965	0.6485	2.4753
1.0026	0.76681	1.04103	1.0697	0.89844	1.39905	0.7047	1.00102	0.54816	0.88904
0.94198	0.56071	0.85691	0.74446	0.7134	1.38774	0.41984	0.78471	0.38251	0.93296
2.46527	0.59706	0.90568	0.73489	0.56423	1.76939	1.47532	1.24002	1.05946	0.88843
1.55312	1.09459	0.89733	0.60791	0.51183	1.9498	0.36731	0.8652	0.88675	1.03459
1.43013	0.72428	0.88405	0.76897	0.68287	1.51765	0.56274	1.06353	0.75778	0.4719
0.93261	0.89992	0.89193	2.23587	0.76862	2.01939	1.63976	0.87751	0.52959	1.36773
1.20104	0.92349	0.94374	1.40306	1.07591	1.84577	0.88606	0.70965	0.70151	0.94537
0.91152	0.79799	0.80283	0.42058	0.82751	1.90825	0.92099	0.77321	0.72257	0.89924
1.43442	0.96432	1.62262	1.37293	0.80603	1.71499	0.90367	0.97326	0.77606	1.69544
1.06011	2.01975	0.85705	1.17763	0.64239	0.41128	1.01796	0.74632	0.48561	0.81445
1.11513	1.30738	1.03907	1.00843	0.86684	0.34342	0.90071	1.1169	0.79526	1.25485
1.10923	0.73554	0.67085	1.80385	0.83925	1.51727	1.22077	1.05598	0.66555	1.12417
1.7341	0.98485	0.86017	1.05761	0.72735	1.80296	0.87535	0.50585	0.85496	0.7151
0.81556	0.79963	0.64905	0.69358	0.80052	1.79157	0.75632	0.61494	0.38976	1.09006
0.80271	0.93304	0.88789	0.89194	0.75789	1.47073	0.81389	0.86867	0.68861	1.10407
1.33317	0.83663	0.72869	0.76331	0.79913	1.79063	0.78225	1.80057	0.82094	0.92737
0.83803	1.4447	0.84202	1.67181	0.68004	1.27045	0.90695	0.81819	0.35784	1.25951
0.78945	0.79864	0.91162	0.70082	0.7275	0.5825	0.54901	0.77966	0.65749	1.34463
1.07851	1.07393	0.80642	0.90862	1.0019	1.74079	0.74137	0.81455	0.43271	1.27608
1.0879	0.91266	0.92785	0.66982	0.91373	2.18691	0.79128	0.83665	0.84428	1.05062
1.04061	0.84213	1.08724	1.01604	0.99343	1.43451	0.70094	0.93963	0.67474	1.10249
1.74501	1.38723	0.69777	0.72554	0.57764	1.51299	0.81885	1.39243	0.62801	1.13355
1.12264	1.676	0.92409	1.55108	0.89105	1.65951	1.35211	1.04103	0.81149	1.22308
1.07147	0.83982	0.84789	2.39964	1.09482	1.79132	0.91718	0.85304	0.49887	0.9255
1.0825	0.80494	0.74331	0.76432	0.80697	1.74413	0.89039	0.41531	0.55484	1.08406
1.14596	2.06949	0.58288	0.85405	0.8622	1.76166	0.88746	0.91257	0.86564	1.15634
0.82238	0.8375	1.0195	0.48978	1.09581	1.72112	1.15102	1.17554	0.19598	1.06754
1.06701	0.71596	0.69605	0.92502	0.557	1.85195	0.68486	0.842	0.49471	1.19915
1.24554	0.75648	0.84928	0.63671	0.6217	1.37424	0.83399	0.93654	0.84779	0.9924
1.11408	0.9283	0.93461	0.67171	0.60882	2.34799	0.91287	0.56384	0.54882	1.2791
0.76098	0.90838	0.89614	0.80013	0.88656	1.75741	0.90222	0.71848	0.89934	1.28452
1.08068	0.91952	0.84939	0.75105	0.83106	1.75734	1.19708	0.73681	0.64656	1.07131
1.0727	1.07705	0.94075	0.60474	0.7382	1.63302	6.43927	0.55954	0.52124	1.15082
1.4263	1.15355	1.02419	0.80993	0.8273	1.59901	0.82504	0.80346	0.67009	1.06547
0.88873	1.22709	0.87291	0.72827	2.20675	1.49208	0.92329	0.78216	0.57118	1.02169
1.11155	1.77898	0.83335	0.90278	0.79985	1.57049	0.787	0.86233	0.69431	1.24733
1.08179	1.2199	1.88759	0.62054	0.55247	1.83507	0.86046	0.88773	0.69934	1.19864
1.12	1.02616	0.868	0.49741	1.31457	1.63417	0.69929	0.76937	0.6858	1.44913
0.91033	0.60891	1.05402	1.24699	0.72624	1.84984	0.8359	0.93767	0.86117	1.15964
1.23067	1.14488	0.99569	0.75357	0.85797	1.65207	1.09449	0.78624	0.85487	1.16759
1.00674	0.9973	1.01327	0.78177	1.12257	1.50025	0.91706	0.77655	0.87486	1.61151
1.04508	0.84876	0.77928	0.96206	0.53634	1.75331	0.8515	3.33638	0.7383	1.05801
0.92475	1.09048	1.00799	0.8018	0.49735	1.46173	1.15688	0.88349	1.06393	1.49248
0.98145	1.02266	0.96911	0.60809	0.54578	1.12426	0.72645	0.74631	0.62737	1.51978
0.99398	1.10243	0.93537	0.75446	0.8076	1.49312	0.84921	0.69527	0.72454	1.01814
1.31032	0.8223	0.98231	0.88117	1.83833	1.92515	1.77309	0.82521	0.68559	1.37618
1.16697	0.90606	1.3792	0.81624	0.68546	1.61464	0.88302	0.48311	0.23524	1.09704
1.12575	0.97498	0.87322	0.83812	1.60326	1.74492	0.9377	0.4847	0.76384	1.27715
0.99716	0.72847	0.84898	0.86428	1.36167	1.85623	0.95171	1.04811	0.60476	0.42908
0.85749	0.89799	0.83565	0.86544	0.56868	1.24525	0.87587	0.72415	0.46959	0.87798
1.6278	0.45631	0.90791	0.79036	0.49394	1.49276	0.75027	1.06365	0.71493	1.20051
1.3389	0.84323	1.11951	1.60968	0.74382	1.74678	0.96784	0.95932	0.6354	0.98747
1.91432	0.8623	0.81884	1.02587	0.65722	1.56532	0.81247	0.79118	0.78085	1.11987
0.85003	0.9085	0.96878	0.65066	0.65607	1.60236	0.99473	1.07838	0.36347	0.66844
1.0327	0.74804	0.79109	0.61507	0.86488	1.93886	0.87326	0.99775	0.84933	1.65396
2.08669	1.12121	0.99218	0.8935	0.87282	1.39197	0.85283	1.02237	0.61393	0.87212
0.95102	1.11605	0.78886	0.63863	0.71109	1.25683	0.9409	1.18399	1.02225	1.96008
0.88284	0.96668	0.99254	0.94111	1.96416	1.42327	0.8811	0.90657	0.85663	1.1943
1.14935	0.93022	1.15976	0.93984	0.66641	0.94877	0.80266	0.97223	0.78782	1.2541
1.21006	0.66178	0.86791	1.24562	0.94882	1.2257	1.01061	0.86978	0.88244	1.18993
1.21102	1.07062	0.89409	0.67448	1.40932	1.58368	0.96742	0.86041	0.6875	0.60947
1.11148	2.12582	0.80285	0.74762	1.12374	1.73964	0.63666	1.10111	0.53696	1.29561
0.89734	0.89297	0.83388	0.69713	0.70286	1.46837	0.92174	0.87653	0.69844	0.88066
1.14245	1.27328	0.84915	0.70498	0.80872	1.70372	0.79216	0.95921	0.51926	1.10577
1.08152	0.87643	0.73789	0.85541	0.61326	1.72254	0.75713	0.67985	0.61021	1.29323
1.22282	1.10565	0.92372	0.62204	0.68549	1.4957	0.94494	0.96382	0.69085	1.13376
0.91759	2.05598	0.8491	0.81061	2.03444	1.59793	0.81113	0.57703	0.8302	0.69463
0.92785	0.67607	0.88806	1.02781	0.70755	1.79184	0.54019	0.94427	0.65908	1.03454
1.09113	1.05156	0.9844	0.69011	0.60951	1.88847	0.95616	1.03493	0.7146	1.21821
1.12797	1.50527	0.96378	0.97666	0.66636	1.60426	0.93167	0.81971	0.43681	1.08771
1.12487	0.85587	0.81136	0.81784	0.97194	1.86039	0.76913	0.4962	0.40063	1.14985
1.05871	0.869	0.84666	0.78295	0.74894	1.67714	0.83369	0.85442	0.51531	1.25764
1.20223	0.57772	0.86479	0.71814	0.96532	1.88018	0.7354	0.71174	0.42373	1.20719
1.24018	0.85764	0.74736	0.48866	0.75339	2.06631	0.42744	1.02006	0.38448	0.96754
0.85071	0.95981	0.95669	1.27928	0.77494	1.47866	0.58182	0.6095	0.75261	1.23417
1.01525	0.74284	0.96778	0.61884	0.71976	1.64675	0.93795	0.8082	0.675	1.06062
2.23847	0.90915	1.06107	0.94642	0.7176	1.28214	0.97365	0.70633	0.53677	1.11745
1.13727	0.99348	0.91004	0.73153	1.0159	1.04868	0.77803	1.16869	1.06992	0.93134
0.84791	0.77214	0.79667	1.51771	0.70149	1.33446	0.84521	1.0979	0.70834	1.38266
1.00324	0.63259	1.08117	0.84835	0.61257	1.48179	1.57625	0.45896	0.4637	0.98651
1.10498	1.04345	0.99015	1.12889	0.82142	1.93318	1.03354	0.85198	1.03675	1.38456
1.1248	0.76463	0.8366	0.7315	1.39126	1.6799	0.84784	0.71465	0.70921	1.65357
2.3108	0.88991	0.94607	0.81434	1.33975	1.88802	0.82122	0.88755	0.53247	0.86244
1.11221	1.33522	0.56942	0.60277	1.6598	1.75803	0.77559	0.70336	0.53897	1.17582
2.15023	0.97078	0.97128	0.89383	0.86521	1.46299	0.62348	0.86231	0.66185	0.86648
1.02338	0.61107	1.50673	0.97171	0.79296	1.6892	1.31423	0.86872	0.83715	0.91309
1.11555	0.66344	0.87006	1.54565	0.57954	1.50032	0.76203	1.15524	0.50849	1.0037
1.18775	0.8396	0.80377	0.96679	0.73642	1.39811	0.71991	1.11867	0.57626	1.17517
1.17781	0.95403	0.71974	0.80339	2.51648	1.54244	0.75008	1.16024	0.64151	1.17704
1.22764	0.49132	0.89084	0.83522	0.68602	1.6545	1.04579	0.88413	0.95877	1.28675
0.81776	1.09718	0.85248	0.88298	0.74314	1.71112	0.60611	0.88129	0.57193	1.25341
0.9573	0.85718	1.13958	0.86732	0.67566	1.24589	0.72023	0.79703	0.43731	1.15149
2.62181	0.68362	1.00472	0.69553	1.82316	1.74333	0.83636	0.90749	0.77847	1.30303
0.92744	1.01412	0.91269	0.96456	0.77759	1.74496	0.76682	0.9096	0.77451	1.30919
1.07375	1.14949	0.96184	0.86591	0.751	1.71969	0.84734	0.70453	0.90802	1.24358
0.84269	1.05521	0.9193	0.79781	0.71129	2.17877	0.78381	0.90832	0.65981	1.20569
1.27013	1.18254	0.80773	0.96846	0.69297	1.54657	1.18643	0.84773	0.64267	1.2793
1.00012	0.93098	1.07743	0.86421	0.8032	1.76662	0.84221	1.1116	0.53438	0.7298
0.89757	0.8354	0.73467	0.79204	0.67707	1.45544	0.8409	0.85472	0.75426	1.29094
1.09365	2.00438	1.8199	0.69962	0.82831	1.76607	0.40282	0.75543	0.59525	1.16276
1.00664	1.18655	0.61607	1.03186	0.77813	1.53009	0.75575	1.0229	0.74104	1.32964
1.14741	0.89283	0.56755	0.6172	0.95638	1.55897	0.93686	0.74916	0.85982	1.14326
0.80755	0.98119	1.56585	0.53062	0.73919	0.83557	1.42709	0.9487	0.62237	1.03402
1.18125	2.04001	0.73574	0.65633	0.5394	1.45223	0.48976	0.44202	0.77266	1.46604
1.32601	1.04188	0.86387	0.89934	0.89931	1.52175	0.99873	0.98685	0.47487	1.39666
0.97125	0.84309	1.06722	0.95108	0.58215	1.72326	0.74575	0.65556	0.99888	0.94028
1.49611	1.14993	0.98363	1.05101	1.94839	1.23438	0.70871	0.9568	0.83562	1.30949
0.87696	0.92683	1.41807	0.6932	0.77576	2.21177	0.72979	0.61029	0.86192	1.04915
1.18193	0.94135	0.84753	0.81063	0.74239	1.03383	1.07472	2.9308	0.47767	1.40936
1.23509	0.79492	1.05226	1.01642	0.86299	1.55655	0.80176	1.17852	0.53958	1.07412
0.88792	0.70389	0.9517	0.91298	0.86893	1.69107	1.02468	0.91448	0.57214	0.83295
1.10523	0.89488	0.85162	0.96234	0.85117	1.60688	0.83836	0.69907	0.36723	1.09118
1.01226	0.78619	0.79838	0.87678	1.01682	1.31482	0.77889	0.74562	0.39752	1.03454
1.00458	0.84977	1.18154	0.73396	0.69623	1.17187	0.84561	1.01586	0.6324	1.2111
0.83118	0.89481	0.65578	0.99186	0.68118	1.45236	0.84467	0.91932	1.05519	1.12925
0.85693	0.98722	0.88256	0.71887	0.73389	1.31397	0.90123	0.87904	0.66315	1.38624
0.91358	0.73187	0.91855	0.70955	1.76576	1.76012	1.25602	1.03263	0.77578	1.28472
1.19568	1.13412	0.82697	0.68055	2.27417	1.87444	0.88687	0.99584	0.59995	0.61528
0.96539	2.28507	0.97319	1.0107	0.74949	1.58672	0.71582	0.76918	0.52348	1.36131
1.19586	0.99028	1.07236	0.75807	0.77529	1.5136	0.90547	0.9326	0.7954	1.25682
0.75064	0.70871	0.79999	0.90213	2.31034	1.77451	0.99001	0.82258	0.80284	1.27012
1.04561	0.75747	0.72855	1.05232	0.55657	1.48162	0.70045	0.75129	0.69123	1.37794
1.05194	1.04661	0.88082	0.8639	1.8757	1.7165	0.61969	1.02727	0.60932	1.44225
0.93201	1.16518	1.06882	1.1173	0.58685	3.35316	0.88406	0.85366	0.59608	1.25935
0.69652	1.13317	0.79388	0.55048	0.71898	1.55482	0.90475	0.76823	0.92151	2.95429
0.62918	1.69213	1.2626	2.2522	0.86308	1.86263	0.87993	0.67126	0.91475	1.03626
1.09839	1.03966	0.61727	0.70804	0.91763	1.72626	0.85412	1.91964	1.16076	1.31831
1.063	0.96555	1.00409	0.70629	0.64629	1.59946	0.62869	0.62497	0.84836	1.22622
2.30882	0.98001	1.09003	0.64751	0.78085	1.60957	0.82994	0.66403	0.55437	1.09882
1.18966	0.85606	0.82736	0.71214	0.63936	1.42413	0.90714	0.836	0.89322	1.01729
2.73401	0.99856	0.76315	0.96846	0.95504	2.11287	3.54527	0.92056	0.53339	1.11612
0.76048	0.50902	1.04546	0.64087	0.90267	2.03412	0.78918	0.81566	1.04748	1.5722
0.83925	2.33645	0.82885	0.88765	0.87975	2.58807	1.14561	0.94174	0.50668	0.90731
2.31698	0.65362	0.95197	0.69807	0.75672	1.7138	0.9049	0.972	0.75143	0.67962
0.85447	0.89237	0.95277	0.83957	0.84616	1.95554	0.95772	0.95835	0.84071	0.987
2.88647	0.92252	0.90063	0.79555	0.7255	1.77099	0.89715	1.17431	1.09125	1.19679
1.06011	0.95995	0.91417	0.85585	0.72562	1.67914	0.8804	0.60354	0.66366	1.41806
1.0148	0.97357	0.82052	0.63389	2.21433	1.77556	0.80951	1.03077	1.46643	1.11648
0.83083	0.79526	0.73745	1.77579	0.70871	1.58962	0.74582	0.89904	0.71249	1.16331
1.16958	0.59846	1.16832	0.52969	0.858	1.53014	0.84624	1.10028	0.36514	1.34271
1.54094	1.07024	0.58343	1.39927	0.90065	1.26729	0.99138	0.77233	0.90801	1.93269
0.55747	0.90812	0.84637	2.66405	0.67187	1.65745	0.83045	0.68926	0.47268	1.20841
1.01553	0.78347	1.0215	0.82075	0.72947	1.94724	0.74038	0.94366	0.69971	1.26929
0.5773	1.16407	0.87852	1.13895	0.87548	1.76585	0.90675	0.62869	0.64603	1.21298
1.11186	0.94131	0.82826	0.92445	0.58013	1.64149	0.88714	0.62822	0.91007	0.83233
2.7179	0.69559	0.91478	0.91328	1.63893	1.90465	1.10568	0.61991	0.67287	1.13272
1.92035	0.84197	0.92239	0.81547	0.95333	1.50302	0.93693	0.90908	1.08988	0.8589
1.90804	0.84849	0.81354	2.43656	0.37541	1.8544	1.00938	0.67345	0.7334	0.841
0.97152	0.91784	0.90155	1.34708	1.23861	1.81493	0.55038	0.76483	0.33488	1.38185
1.29283	0.99077	1.02239	0.89832	0.81817	1.31733	0.61036	0.94886	0.49315	1.03253
1.04894	1.07752	1.38565	0.65398	0.8272	1.78855	0.54631	0.93805	0.83765	1.58652
1.00246	0.73159	0.98955	0.98779	1.65713	1.69758	0.65401	1.23066	0.64409	1.05035
1.52585	0.59759	0.9749	1.40708	0.52104	1.40762	0.78165	0.82902	0.61681	1.49321
1.19756	0.77556	0.9745	0.92278	0.77828	1.74864	0.99408	0.88843	0.89891	1.38132
1.34276	1.30003	0.86046	0.70839	1.06704	1.9524	0.74169	0.59761	0.44984	1.02146
0.90877	0.95117	0.97633	0.63299	0.74503	1.65919	0.79656	0.888	0.77042	1.12926
0.89129	2.14528	0.89927	0.73337	0.88061	2.05691	1.65339	1.01409	0.56274	1.50509
0.7796	0.91273	1.08099	0.8624	0.80475	1.75188	1.79101	0.97853	0.80661	1.23726
1.08049	0.82148	0.96032	0.63578	0.79719	1.67337	0.99532	0.81026	0.48009	1.00294
0.85399	0.83949	0.54523	0.85792	0.80524	1.93134	0.8019	1.01724	0.56035	1.12942
0.73907	1.14611	0.9092	1.02382	1.11226	2.05476	0.67172	0.94504	0.61977	0.72489
1.01818	0.89539	0.78957	0.98478	0.61451	1.74083	0.83609	0.93845	0.56306	1.30352
0.90155	1.09042	3.03495	0.74261	0.7233	1.45905	0.95536	0.83944	0.72783	1.05323
1.13579	0.948	0.94044	0.71057	2.93964	1.83715	0.96566	0.77544	0.60622	1.27346
0.93056	0.8273	0.89439	0.81455	0.81453	1.88218	1.40109	0.94038	0.6938	1.21676
1.00504	0.86693	0.83706	0.88447	0.93803	0.8535	0.81623	0.65364	1.03806	1.51404
1.09874	0.64412	0.76384	0.49506	0.77734	1.96172	0.94441	0.99811	0.48902	1.04808
0.96484	1.09673	1.0362	0.64278	0.8308	1.56382	0.82007	0.88152	0.69873	1.07879
1.09223	0.64159	0.93351	0.84385	0.90366	1.66051	2.20058	0.97224	1.06247	1.14989
0.95099	0.6427	0.86631	0.91859	0.76023	1.66555	0.58193	0.65974	0.61589	1.18689
0.72506	0.6925	1.009	0.92066	0.81201	1.82229	0.90913	0.76575	0.77828	1.02703
1.13285	0.82848	0.93799	0.46946	0.65964	1.75456	0.80021	0.81485	0.86914	1.23269
1.05376	0.92763	0.73103	0.78172	0.78497	1.9875	0.90789	0.97349	0.87503	1.56756
0.64982	0.96391	1.02071	0.69818	0.59156	1.59027	0.95446	0.6103	0.59617	1.061
0.87211	0.68074	0.70408	0.93447	2.53498	1.62095	0.7215	0.95618	0.90481	1.30248
0.94812	1.0755	0.766	0.46772	0.87836	1.73734	0.61183	0.87455	0.73382	1.12619
0.76526	1.73219	0.92577	0.97486	0.80701	1.7092	0.7776	0.77674	0.69239	1.15188
1.06362	0.69562	0.95271	0.85685	0.86784	1.62955	0.67493	0.82943	0.42771	0.97683
0.88427	0.88087	0.75553	0.83484	0.70142	1.34819	0.83118	0.85272	0.68644	1.16633
0.87033	1.58027	0.57368	0.55251	0.76592	1.76431	0.77034	0.98985	0.41783	1.30339
0.93764	0.8197	0.81158	0.85991	2.07347	1.69987	0.59336	1.16586	0.64191	1.1188
0.65125	0.45681	0.83692	1.52979	0.95943	1.71588	0.72637	0.92904	0.72825	0.8428
1.90627	1.10702	0.93541	0.884	0.74172	1.90461	1.08731	0.83713	0.62931	1.13628
0.96356	0.94696	1.13844	0.7245	0.8308	1.99423	1.13359	0.95983	1.08065	1.49701
0.94725	0.97803	0.83557	0.95981	0.76908	1.74573	1.07204	0.76057	0.66596	1.09596
1.03676	0.85329	0.96989	2.01505	0.56553	1.57178	0.95473	0.62826	0.81268	1.25146
1.10075	0.25514	1.04439	0.77463	0.76957	2.23899	0.70551	0.76941	0.7989	1.14509
0.99925	1.29106	0.74537	0.77741	0.8451	1.53846	1.05054	0.73499	1.21914	1.12748
0.94276	3.99747	0.58662	1.36382	1.73006	1.43707	0.90881	1.15342	0.71145	2.20919
1.15939	0.988	0.98376	0.42183	1.35058	1.33747	0.90092	0.44554	0.59107	1.02432
0.90199	0.89657	0.76423	0.87786	0.95745	1.54819	0.68483	0.96647	0.7846	1.30866
2.05366	1.41405	0.80766	0.67796	0.85409	1.91115	0.73758	0.80926	0.76847	1.23513
1.09617	1.05287	0.77745	0.8188	0.8028	1.6391	0.86187	0.96224	0.61795	1.17955
1.0634	0.95079	0.79325	0.681	0.79029	1.44957	0.8968	1.05501	1.01804	1.16056
1.20033	1.05286	0.84116	1.04216	1.12592	1.45225	1.34266	0.82867	0.62342	1.06677
0.9658	1.13392	0.89878	0.72719	2.07264	1.93127	0.80496	0.88658	0.81961	1.43687
1.31848	0.86755	0.95828	0.66903	0.94037	1.58888	0.9028	0.62706	0.83761	1.13935
1.02078	0.94057	0.98888	0.66969	0.69446	1.83966	0.71172	0.94994	0.45279	1.51052
1.02968	1.01688	1.22746	0.75038	0.81678	1.82143	5.04954	1.02672	0.36875	1.0616
1.10181	0.91727	0.99096	0.80423	0.62751	1.79382	0.71882	0.82704	0.66378	1.53774
0.97845	1.10894	1.05172	0.77415	0.65923	1.47533	0.61338	1.05097	0.82248	1.23085
0.77607	0.81283	1.02854	0.92052	0.86414	1.35989	0.85587	0.7438	0.45455	1.12548
0.68763	0.69447	0.91783	0.84246	0.91396	1.65296	1.32021	0.63995	0.50175	1.07897
1.24003	0.90855	0.82764	0.7626	0.67004	1.60324	0.91615	0.55601	0.66007	0.93346
2.6059	0.9232	0.82707	0.69373	0.92051	1.86871	1.39945	0.9753	0.45403	1.37523
0.98027	2.01136	0.87703	0.97219	0.62381	0.97116	0.94348	0.92082	0.47624	1.7118
0.87059	0.91519	0.79871	1.03817	1.66801	1.4015	1.02584	0.6199	0.70587	1.00647
1.43798	0.96111	0.86792	0.72814	0.69125	1.6635	0.38854	0.97641	0.6244	1.40482
1.25232	1.42313	0.50961	0.71848	0.74001	1.87527	0.84945	0.80158	0.67719	1.50259
1.1869	2.11083	0.86812	0.57015	0.63993	1.87299	0.6821	0.88657	0.72871	1.15455
1.21208	0.89413	0.92783	0.57022	0.9185	0.79538	0.64682	0.85267	0.50849	1.35568
1.25022	0.65926	0.87103	0.70936	0.90333	3.31216	0.7503	0.74925	0.6611	0.9821
0.9408	0.67606	0.87972	1.61736	0.74958	1.88192	0.529	0.89731	0.82825	1.36642
0.86562	0.57443	0.97173	0.62869	0.76189	1.50511	0.7034	0.78589	0.78703	1.36961
0.91663	0.79651	0.93081	0.74952	0.66814	1.03287	0.86511	0.65828	0.91906	1.01756
0.94779	0.6992	0.96757	0.5924	0.66172	1.72767	0.86443	0.77317	0.97693	1.05326
1.32758	0.86309	0.79004	0.63844	0.71205	1.5949	0.63366	0.89305	0.68394	1.00794
1.10316	0.81405	1.15682	1.01081	1.00529	1.86148	0.7217	0.90638	0.75438	1.51345
0.77212	1.04805	1.08163	1.27982	0.7849	1.72819	0.75563	1.01562	1.03666	1.30975
1.11411	0.97363	0.91843	0.74143	0.78581	1.85286	0.87092	0.59988	0.67828	1.19962
1.6302	0.88892	0.88715	0.67347	0.69887	2.10352	0.83425	0.957	0.68758	1.16553
2.69728	0.93177	1.13677	0.66489	0.77563	2.43875	0.6196	0.92721	0.72683	0.94982
0.80613	0.69236	0.9588	0.62458	0.99489	1.58064	0.61836	1.12463	0.83935	0.71377
0.96897	0.6235	0.84168	0.75411	0.54926	1.8732	1.34607	0.76573	0.87777	1.30302
1.0897	1.09045	0.86516	0.63151	1.0621	1.86231	0.83941	0.33476	0.67482	1.20489
0.76172	0.94187	0.74067	0.93058	0.47714	1.20434	1.10868	0.70997	0.42424	1.02672
1.08005	0.97549	0.78356	0.69483	1.50742	1.71437	0.9027	0.84712	0.81791	1.06481
0.88608	1.03876	0.80128	0.59544	1.54482	2.1517	0.54756	0.75145	0.64808	1.12133
1.06592	0.95239	0.81961	0.79251	0.43811	1.26614	0.67629	0.68789	0.7001	1.24933
0.83188	0.7927	0.86773	0.82628	0.68764	1.48771	0.81548	0.91449	0.68523	1.03817
0.72139	0.90683	0.81653	0.62571	0.47982	1.85207	0.7987	0.61848	0.82859	1.18856
1.02721	0.84904	0.83409	0.74276	1.07326	1.79328	0.8019	0.89872	0.64275	0.91826
0.72996	0.8366	1.28957	0.94444	0.64627	1.77665	1.03204	0.62469	0.41779	0.86517
0.95995	0.87293	1.0187	0.75681	0.79305	1.77052	1.02776	0.77409	0.70749	1.85825
0.93191	0.6958	0.841	0.60727	1.77401	1.94021	0.93531	1.18286	0.80523	1.25612
0.94566	1.00544	0.90834	0.53817	2.05821	1.79624	0.7411	0.76919	0.82712	0.90134
1.03558	0.82008	0.60624	0.9015	2.46697	1.87547	0.63794	0.78467	0.68032	1.36354
0.92893	0.79094	1.03143	0.70499	0.76042	1.97115	1.17958	0.7523	0.43883	1.11564
1.55615	0.85513	0.84157	0.86534	1.01741	1.84961	0.9886	0.60796	0.72005	1.24785
0.87566	0.91801	0.84213	0.85776	1.00114	1.60523	1.03253	0.96384	0.86967	1.12893
1.04695	0.73602	1.05789	0.96695	0.46226	1.7225	0.92219	0.95907	0.46347	1.30908
1.10739	0.87392	0.98849	0.89295	0.94195	1.88573	1.03746	1.13745	0.55832	1.24163
0.78408	1.06621	0.77982	1.14714	0.6301	1.95763	0.67101	0.89951	0.84883	1.47254
0.98449	0.93431	0.81291	0.72166	0.60599	1.74989	0.57816	0.64891	0.75488	1.08557
0.81221	1.50276	1.16598	0.66539	0.88649	1.79428	0.96007	0.78611	0.61818	0.77215
2.27552	0.55165	1.00473	0.80743	0.78067	1.45915	0.83516	0.93291	0.53209	1.00935
1.22763	1.18191	0.51732	0.81257	0.6253	1.87084	0.78883	0.87865	0.68011	1.02738
1.02691	0.90953	0.78596	0.72036	0.89128	1.99638	0.71696	0.55844	0.65535	1.58534
1.15951	0.83963	0.94795	0.70427	0.68155	1.19321	1.00243	0.76752	0.69321	1.35231
0.5528	0.84049	0.93825	0.85182	0.74858	2.22054	0.67396	0.50354	0.54007	1.07728
0.97975	0.70695	1.0148	0.66671	0.5598	1.82726	0.90852	0.88562	0.41081	1.08536
1.05315	0.80657	0.65254	0.65044	0.57721	1.68122	0.95674	0.87464	0.94783	0.98911
2.07931	0.6588	1.04702	0.87263	0.76345	1.61629	0.79066	0.88012	0.57532	1.27794
1.15806	0.80136	0.89086	0.35644	1.07557	1.71039	0.82948	0.60765	0.68258	1.7488
1.16456	1.06756	0.95299	0.77163	0.51132	1.82254	0.65804	0.74322	0.87068	0.82313
0.77934	0.72639	0.99672	0.76178	0.7986	1.87254	0.77917	0.63161	0.7961	1.27159
1.13807	0.98954	0.86088	0.84531	1.11718	1.86352	1.0626	1.04627	0.7045	2.99115
1.1823	0.316	0.98572	0.88668	0.74336	1.83185	0.66851	1.31307	0.99882	1.25908
1.19805	0.86617	0.95869	0.7145	0.71511	1.81402	0.84909	0.93391	0.45157	0.93953
1.02199	0.818	0.86879	0.97445	0.77602	1.84977	0.71693	0.58515	0.77259	1.61239
1.43246	0.87506	0.76191	0.57745	0.76695	1.30616	0.61263	0.78008	0.63226	1.30989
0.58455	1.16079	0.90729	0.56458	0.82932	1.46025	0.90808	0.93755	0.17054	1.41978
3.49459	0.55877	1.11722	0.7627	0.70103	1.78215	1.02978	0.81877	0.76394	1.15482
1.79286	0.92043	0.87017	1.0584	0.39891	1.82318	1.50608	0.69655	0.72597	1.50688
2.21863	0.6163	0.87663	0.55969	0.8221	1.94135	0.81152	0.94501	0.67578	1.61405
1.54178	0.9897	0.93992	0.77878	0.97157	1.86787	0.85152	0.91137	0.70998	0.54431
1.07376	0.87225	0.90905	0.82901	0.93518	2.09993	0.58692	1.26687	0.7662	1.26152
0.82654	0.7852	0.93892	0.7409	0.96019	1.83655	0.89135	0.7784	0.49948	1.33072
1.00532	0.61317	0.97949	0.59693	1.75377	1.49546	0.86781	0.3518	0.38027	0.8658
0.90415	1.37777	0.93195	0.70911	1.02226	2.15543	1.04468	0.76728	0.73492	1.08119
0.98261	0.80442	0.73188	0.79554	1.00669	1.46847	1.03621	1.10341	0.67958	1.2745
1.06675	0.65514	0.6402	1.02448	0.71412	1.64298	0.90326	0.9447	0.75992	1.5086
1.15454	0.91748	0.78254	0.91895	0.80204	1.74663	0.87493	0.81036	0.69845	0.91186
1.70519	0.72613	0.8894	0.6718	1.05968	0.9286	0.88193	1.5215	0.64755	1.03832
1.00644	0.84763	0.92315	1.02769	1.96709	1.49891	0.93844	0.95777	0.76469	1.40305
0.99855	0.90974	1.14196	0.77361	0.77484	1.65142	0.94971	0.87054	0.55437	0.90232
1.45243	1.208	0.71745	0.84227	0.63402	1.69486	0.61672	1.04416	0.3953	1.50378
1.07619	1.10158	0.88098	0.84983	0.82258	1.79281	0.90188	0.94835	0.58451	0.76272
1.20119	0.97286	0.83545	0.56239	0.81515	1.93918	1.06429	0.63705	0.50593	1.20424
2.25196	0.72698	0.91417	0.70604	0.81463	1.58697	0.80986	0.52068	0.80031	1.32805
1.02776	0.95455	0.82134	0.88957	0.61157	1.53966	1.20318	0.90046	0.88824	1.55916
0.79612	1.16149	1.0346	0.46186	2.89919	1.89523	1.00845	0.98834	0.57418	0.83074
1.02018	1.69195	0.96754	0.74057	1.00424	1.93833	0.87478	1.00132	0.78347	1.27868
1.35096	0.83875	0.65392	0.81552	0.78598	1.54564	0.69719	1.24948	0.78937	1.22046
1.06796	0.86284	0.8483	0.68743	0.82842	1.94449	2.77488	0.98493	0.78292	1.28888
0.83657	0.75893	0.88811	2.84139	1.34384	1.97835	0.97796	0.56854	0.6461	1.48236
0.9545	0.86351	0.94884	0.93371	0.57139	1.83917	0.83205	0.51476	0.88689	1.05732
0.85484	0.91258	0.92132	0.3891	0.46869	1.80664	0.77933	0.60179	0.53777	0.90977
1.09417	2.48694	0.86643	0.73258	0.97349	1.83433	0.78305	0.94685	0.90249	1.07706
1.03842	0.99127	0.83552	1.07766	0.70951	1.71713	0.83314	0.67186	1.30728	1.33139
0.95027	0.94611	0.88809	1.08846	0.93517	1.34337	0.8807	0.90167	0.86422	1.55578
0.77659	0.82037	0.87381	0.92522	0.77746	2.22219	0.65439	1.12131	0.92055	1.40662
0.76607	0.58957	1.01336	2.92785	2.54103	1.72258	4.39776	2.08654	0.71075	2.67966
1.11991	0.70108	0.90902	1.27985	0.64142	2.02029	0.56833	1.07694	0.62735	0.5208
1.06626	0.88837	0.71464	1.54941	0.76659	2.01107	0.84429	0.93187	0.66026	2.31794
1.6445	0.96389	0.81515	1.8461	1.28782	1.28603	0.7053	0.91596	0.83375	1.17194
0.79341	1.07761	0.99886	0.66248	0.74643	1.97964	1.45692	0.86056	0.566	1.12208
0.84754	0.88739	0.81635	0.80928	0.72605	2.09549	0.7863	0.761	0.65747	1.0544
0.92284	0.89936	1.14016	0.56502	0.65798	1.52392	0.77919	0.81636	0.89715	1.36878
1.16562	1.06018	1.28409	0.39252	0.76588	1.8316	0.52937	0.91471	0.274	1.03624
0.83455	0.70183	1.02843	0.94166	0.67495	1.86457	0.6345	0.63745	0.40392	1.51146
1.13093	0.54886	1.07426	1.03376	1.29004	1.71889	0.75795	0.91289	0.30559	1.49858
1.43526	0.95376	0.89713	0.85964	0.91419	1.59702	0.66808	0.86102	0.63586	1.13119
1.10015	0.94116	1.03299	0.86821	0.88086	1.86131	0.85269	1.07884	0.59447	1.3388
2.25074	0.84441	0.92574	0.60585	0.76762	1.81718	0.80299	0.80114	0.49904	1.30279
1.10676	0.82057	1.05068	0.93182	0.75506	1.18946	0.63349	0.88502	0.38657	0.74179
0.82308	0.6007	0.88152	0.77617	2.29188	1.87575	0.72551	0.97002	0.80973	1.23628
0.86146	0.84486	1.20071	0.71528	0.87282	1.7213	0.77853	0.99519	0.72958	0.94387
1.13235	0.74309	0.87613	0.95801	1.73215	1.89019	0.98177	0.74948	0.81828	1.4793
0.92491	1.08116	0.99144	0.94996	0.71394	1.80046	0.48612	0.50769	0.63997	0.86564
1.16893	1.4958	0.84478	0.93627	1.77107	0.7224	1.03742	0.87944	0.53184	1.19358
1.12469	4.71006	1.23836	0.92664	0.75984	1.37439	1.24882	0.77565	0.69945	0.77272
0.98515	0.98859	0.74251	1.17877	0.69627	1.68504	0.81821	0.73324	0.30517	0.97921
1.3102	0.81864	0.81728	1.74222	0.73448	1.90081	0.98199	0.75284	0.70495	0.95092
1.06584	1.41925	0.96129	1.01886	0.8276	1.9213	0.84556	0.86371	0.56976	1.23755
1.29945	1.01375	0.87098	0.64674	0.87973	0.74815	0.84592	0.73437	0.56979	1.0565
1.28653	0.94656	0.76241	0.60425	0.62135	1.40489	1.31283	0.90604	0.77023	1.12849
0.61356	0.78038	0.94481	0.54033	0.73828	1.51022	0.94892	0.97875	0.63926	0.9455
0.92893	2.40586	1.17675	0.96834	0.80459	1.88659	0.89029	0.89332	0.7614	0.70286
0.95542	0.96484	1.30787	0.85746	0.81028	1.76231	0.82114	0.92679	0.30557	1.4925
0.96294	0.94637	1.24674	0.8211	1.27018	1.79452	0.7152	0.96219	0.8622	1.54968
1.19942	0.90476	1.02725	1.17154	0.86354	1.37127	0.89101	0.85302	0.46415	1.26808
1.09302	0.89413	1.07635	0.74777	1.29105	2.01067	1.15246	0.88352	1.19462	1.41904
0.94102	0.9803	0.9405	0.66057	0.49987	1.35554	0.65028	1.14436	0.8173	1.44391
1.26127	0.81672	0.82951	0.78525	0.87723	1.19056	0.52067	0.74289	0.83411	1.08062
1.25977	2.06938	0.96419	0.9136	0.67395	1.93761	0.80304	1.19476	0.76443	1.0578
0.85823	1.00147	0.78473	1.74766	2.03176	1.83587	0.77653	0.93431	0.68548	1.21792
0.99104	0.56252	0.82199	0.79181	0.74736	1.75164	0.58263	1.13016	0.54141	1.05867
0.97093	0.92973	0.89502	1.39801	0.93785	1.62247	0.78618	1.04047	0.71886	0.86343
2.6912	0.86812	1.04379	0.78909	1.51026	1.77474	0.6405	0.61599	1.12279	1.07066
0.99664	0.65483	0.99013	0.55874	2.40377	1.79749	1.45179	1.30191	0.57613	0.97344
0.89411	0.80924	0.9002	0.6979	0.76686	1.93429	0.84834	0.90261	0.53039	1.00965
0.46449	1.03336	0.93433	0.85649	0.78625	2.12455	0.86686	0.80721	0.99383	1.34068
0.92033	0.98275	0.85488	2.21856	1.19219	1.85914	0.86553	0.85959	0.74079	1.37282
1.00487	0.68613	1.0864	0.74042	0.80689	1.72134	0.94452	0.73154	0.73236	1.12487
0.77738	0.65042	0.68591	0.66177	0.82682	1.8969	0.80305	0.51186	0.74893	0.76023
1.09194	1.13052	0.89695	1.10047	0.72467	1.63204	0.71678	2.96389	0.48852	1.08214
1.11244	0.84302	0.87266	0.73582	1.6077	1.53207	0.65063	0.50953	0.73937	1.39317
1.77104	1.13982	0.93319	0.86908	0.51342	1.05558	0.65673	0.74312	0.21514	1.43776
0.79873	0.72668	0.80687	0.66774	0.77977	1.37632	0.60708	0.81651	0.67724	1.17329
1.07985	0.93473	0.82369	0.72512	0.80637	2.16757	1.07275	0.75023	0.63475	1.25135
1.26386	0.9761	1.03389	0.7245	0.84149	1.83663	0.83664	0.68861	0.77186	1.32619
1.03201	0.76072	1.19826	0.68695	0.84665	1.56065	0.64691	0.87221	0.46281	1.27904
0.99108	0.65501	1.06348	0.72245	0.56189	1.97584	0.87338	0.70513	0.65617	1.31153
3.2859	0.7407	2.64966	1.15931	0.81523	1.9642	0.76384	0.83913	0.55505	0.76922
1.16998	0.74739	1.12569	0.82854	0.63798	2.14638	0.91759	1.16995	0.63188	1.11283
0.80099	0.98883	0.83392	0.57242	0.698	1.96722	0.79132	0.71012	0.62965	0.52127
1.06683	1.00973	0.7947	0.80407	0.5926	1.92721	0.81295	0.9696	0.80737	0.68218
1.15905	0.91604	0.63495	1.02057	0.91677	1.89858	1.21607	1.06587	0.82911	1.10382
0.87272	1.008	1.00807	2.36966	0.63586	2.11894	0.86741	0.4633	0.78942	1.66388
1.12567	0.82829	1.00861	1.05235	0.71258	1.63178	0.99876	0.76819	0.66429	1.51239
1.01395	1.11937	0.82708	0.6803	0.84061	1.65158	0.53216	0.73155	0.51559	1.23582
2.19748	0.87313	0.94884	0.78148	3.30123	1.85681	0.67314	0.45441	0.90933	1.25614
1.15776	0.84296	1.0457	0.64424	0.67408	1.42505	0.78331	1.0012	0.59576	1.30867
0.86206	0.92734	1.0572	0.85173	0.89409	2.30024	1.1038	0.85502	0.62005	1.18173
1.00431	0.90793	0.53948	0.90693	0.82852	1.7038	1.24237	0.85014	0.53887	1.48756
1.0438	0.90264	0.61043	0.93913	0.83348	1.51313	0.87284	0.77363	0.73184	2.31691
0.82605	0.82728	0.94053	0.67358	0.90488	1.75406	0.81285	0.79834	0.78729	1.39067
0.9856	1.06703	0.8382	0.61392	0.59338	1.51687	0.86175	0.90884	0.86253	1.27988
0.65948	0.93567	1.13063	0.88335	0.51739	1.47617	0.89795	1.0308	0.52024	0.98806
1.02598	0.87752	1.4955	0.66932	1.01952	1.90462	1.01792	1.00175	0.46837	1.28378
0.99646	1.01436	0.77677	0.5721	1.24768	1.59991	0.71194	0.87562	0.66723	0.88932
1.13204	2.26074	0.92768	0.63973	0.72961	1.34339	1.23601	0.45474	0.8346	1.27807
0.94974	1.07907	0.77431	0.80503	0.65126	2.0825	0.99345	0.71206	0.74841	0.95049
1.072	0.97971	0.89002	0.92571	0.9072	1.24939	1.20201	0.98295	0.83748	1.05961
1.10113	0.9614	0.67855	0.6762	0.70883	1.89757	0.75368	0.83483	0.69827	0.59122
0.91272	1.05477	1.00264	0.74658	0.7986	1.9297	0.94287	0.8202	1.01277	1.22127
1.09652	0.91867	0.95641	0.78323	0.83908	2.03046	0.72924	0.76579	0.52578	1.52116
0.97398	2.06579	0.52848	0.93975	0.6238	1.65727	0.87725	0.85498	0.69489	1.26441
1.01213	0.89632	0.57792	0.67835	0.63631	1.75045	0.51996	0.79969	0.61601	1.32664
1.18362	0.72565	0.99788	0.75583	0.78904	1.58142	0.99685	1.04056	0.73627	1.25818
1.36845	0.74435	0.97631	1.38414	0.71339	2.3725	0.61037	0.81024	0.79593	1.15876
0.91684	0.44578	0.59436	0.67493	0.79104	1.93449	0.80396	0.86111	0.787	0.98423
1.06922	1.13306	0.88555	0.74349	0.67465	2.30822	0.53643	0.86166	0.72956	1.0321
0.71619	0.71085	0.93726	0.8633	0.72889	1.5244	1.48325	0.71172	0.47401	1.67003
1.18514	0.8634	0.83851	0.70077	0.84054	2.10158	0.71242	0.90614	0.61986	1.10064
1.35906	1.62894	0.83751	0.55534	0.79915	2.03779	0.81729	0.43335	0.7586	0.99672
1.24503	0.86692	0.78188	0.80738	2.31335	1.76985	0.74314	0.44638	0.77902	1.11055
1.1645	0.61014	0.89114	0.73675	0.6853	1.92198	0.87881	0.96237	0.88389	1.62708
0.89183	0.79883	0.59619	0.73909	0.78932	1.84745	0.67868	0.87896	0.60002	1.23973
1.02157	1.06406	0.9073	1.08924	0.54481	1.62321	0.75948	0.67897	0.86749	0.97994
2.08949	0.92894	1.01203	0.79994	0.83691	1.66713	0.89639	0.98326	0.91882	0.91798
1.01004	0.80764	1.01398	1.14319	0.6734	1.7202	0.73431	0.87151	0.65608	0.70512
1.11747	1.07824	0.74719	0.82843	1.02814	1.83734	0.38729	1.13596	0.41324	1.22972
0.92658	0.85081	1.00635	0.61913	0.95921	1.71732	0.97809	0.9564	0.8485	1.06513
0.5131	0.9998	0.91974	0.83752	0.63818	1.84088	0.69109	0.91706	0.88703	1.30813
0.87812	1.12549	0.71112	0.59441	0.79462	1.65397	1.22517	0.97736	0.78149	1.00142
1.78942	0.98937	0.98038	0.9511	0.94545	1.86108	0.87851	0.62658	0.35227	1.08882
0.87962	0.79591	0.67199	0.8974	0.84391	1.32646	0.77775	1.07673	0.80388	0.86695
1.05315	1.0092	0.95699	0.68972	0.70423	1.4052	0.95158	0.41534	0.68649	1.51126
0.93806	1.61793	0.88279	1.13641	1.02028	1.64599	0.68499	1.10341	0.61013	0.98211
0.75998	0.90165	0.97889	0.73336	0.81252	1.89735	0.76303	0.86554	0.79999	1.24594
2.12579	0.8189	0.80459	0.82906	2.45373	1.84895	0.64884	0.66558	1.21457	1.09412
0.41038	0.58996	0.71162	0.7581	0.60367	1.45945	0.56098	1.00084	0.84761	2.48618
0.71868	0.74751	0.85037	0.60579	0.76379	1.66633	0.53305	0.92722	0.26236	1.11213
0.84809	0.85448	0.86201	0.66535	0.72274	1.69252	0.3572	0.86731	0.46665	1.68592
1.40319	1.28707	0.69534	0.84941	2.51482	1.17321	0.97057	0.96396	0.51019	1.18047
0.87738	0.88691	0.93298	2.30559	1.8385	2.3542	0.40841	0.97367	0.93473	1.50512
1.08859	0.96118	1.9505	0.83532	0.76771	2.50013	0.72871	0.76967	0.61206	0.9648
0.99395	0.76153	0.82978	0.78115	0.6057	1.48812	0.75285	0.97385	0.79689	1.34927
0.97357	0.7948	0.71507	0.77562	0.74081	1.66038	1.01839	0.81104	0.6718	1.44789
0.98254	0.86877	1.16149	0.78071	0.79837	0.92703	0.95747	1.0208	0.86807	1.09375
1.20181	0.80443	0.88777	0.65325	0.47485	1.64241	0.92102	0.5534	0.90723	0.75991
2.70571	0.90531	0.8406	0.54435	0.74779	1.96952	0.98899	0.78766	0.8229	1.14203
1.3863	0.96258	1.02446	3.3552	0.40929	1.50631	1.3702	0.63896	0.48097	0.90215
0.93828	1.11893	1.71916	1.26954	0.53753	1.2263	1.13101	0.90927	0.90607	1.26739
2.34522	0.88946	0.67728	1.03918	0.6646	1.39983	0.97036	1.06136	0.76534	1.19342
1.71311	1.13504	0.97978	0.88531	0.94701	1.79925	0.88532	0.89073	0.97791	1.37941
0.87742	1.29229	2.20581	0.66394	1.0232	1.90579	1.1055	1.06792	0.3158	1.19965
0.74484	1.22931	0.87028	1.48377	0.48302	1.45465	0.90306	0.92588	0.85399	1.02368
5.60882	0.94136	0.79792	0.64836	2.39879	1.78127	0.78063	0.73287	0.68066	1.28594
1.09489	0.99022	0.96664	1.01681	0.76764	1.76043	0.95119	0.93572	0.41435	1.1028
1.22415	0.50569	0.96531	0.78815	0.85648	1.67718	0.82683	0.79977	0.88123	0.90579
1.08823	0.89657	0.7501	0.93196	0.73512	1.32759	0.93479	0.82533	0.53816	1.01551
1.20152	0.91809	0.96766	0.71666	0.65433	1.85469	0.81223	0.92753	0.91437	0.42998
1.73589	1.02184	0.97853	1.06601	0.63458	2.08033	0.95045	0.81185	0.5517	1.3161
0.76775	0.79101	1.09424	0.70925	0.89393	1.54688	0.76258	1.2362	0.75366	1.0699
1.11867	0.9443	0.92528	0.64079	0.86903	1.81794	1.05175	0.97684	0.73129	1.41056
0.4712	1.02244	0.88216	0.5982	0.98268	2.07745	0.82194	1.49154	0.68828	1.1864
1.13141	1.00788	0.84018	0.57175	0.64553	1.76939	0.76666	0.61214	0.45166	1.33296
0.77694	1.00703	0.88997	0.52732	0.60773	1.83542	0.73563	0.96922	0.88763	1.19376
0.96847	0.92134	2.39038	0.75028	1.1006	0.955	1.02705	0.69219	0.62059	1.12685
0.91923	0.74136	0.94642	0.77723	0.69828	1.80105	0.80501	0.78912	0.77489	1.22493
1.07359	0.67858	0.96672	0.74649	0.88947	1.82589	0.68375	0.88513	0.73971	1.25988
1.36198	1.0543	0.84031	0.6049	0.64672	2.02568	0.87276	1.18773	0.68953	1.19972
1.30632	0.99197	0.68771	1.20799	0.85087	1.8809	0.47485	0.93357	0.84799	0.90646
1.15075	1.96338	1.09969	0.62861	0.85998	1.72263	1.14877	1.05046	1.04683	1.60758
1.02715	0.8446	0.96991	0.69446	0.79492	1.86832	1.54593	0.53577	0.3313	1.30444
0.80406	0.73205	0.75969	1.03084	0.77566	1.85935	0.78122	0.94235	0.95834	0.84721
1.49099	0.97247	0.86461	1.5199	0.87087	1.71739	0.99207	0.54218	0.56832	1.76733
0.77556	2.14189	1.02374	0.83969	0.8795	1.26663	0.64546	0.77107	0.5847	1.05698
1.00284	0.95523	0.7849	1.91793	0.71414	1.84266	0.73921	0.77926	0.71578	1.57921
0.85419	0.99664	0.48602	0.65392	0.84498	1.66183	1.11618	0.72258	0.55399	0.95103
1.10959	0.72925	0.98089	0.50146	0.63992	1.61309	0.73681	0.99421	0.67819	1.10322
0.83399	0.85255	0.96143	0.8167	2.55806	0.3449	0.7187	1.02005	0.69131	1.14476
0.94913	5.05228	1.11518	1.0502	0.63898	1.62636	1.19095	0.42171	0.77655	1.05601
2.08823	0.79246	0.92344	0.82914	0.68277	1.7563	0.85545	0.85024	0.69378	0.88163
0.70098	1.19397	1.03411	0.77045	0.54604	1.78303	0.49915	0.98713	0.37077	0.83541
0.59074	0.78549	0.72022	0.75179	0.61621	1.69632	1.25029	0.84863	0.68544	1.03115
0.73567	0.94412	1.01471	0.85757	0.68941	1.93554	0.90612	0.98683	0.76171	1.05377
0.93235	2.64258	0.97724	0.68947	0.91244	1.82767	0.83892	1.47528	0.50444	1.22282
0.82152	2.55185	0.80609	1.02619	0.59089	0.33885	0.69176	0.9936	0.63933	1.39081
1.03565	0.97091	0.89558	0.48661	0.80382	1.90572	0.93181	0.81676	0.52005	1.39981
0.77936	0.58401	0.92106	1.44207	0.78139	1.62786	0.8999	0.51981	0.71246	1.43931
1.08328	0.90583	0.79413	0.85457	0.85314	1.74696	0.8396	0.94567	1.02133	1.42989
1.13737	0.79381	0.7869	0.75248	0.59608	1.47819	0.70394	0.92411	0.73158	1.10466
2.41133	0.87097	1.13813	0.76718	2.35674	1.7956	0.70033	0.65597	0.63673	1.29824
0.51322	0.84197	0.94387	0.26696	0.6028	1.84355	0.98084	1.13035	0.56349	1.21162
0.88916	0.89918	1.0208	0.59129	0.6888	1.83103	0.77936	1.03797	0.78955	1.02232
0.98549	1.06894	0.94758	0.85104	1.69194	1.80692	0.77691	0.90589	0.7356	1.13651
0.92489	1.08016	1.10808	0.88035	0.9436	1.78811	0.77443	0.85713	0.7712	0.96398
1.04235	0.85439	1.77774	0.67873	0.81265	1.76681	0.94971	0.49729	0.39289	1.64893
1.16021	1.12831	0.9448	0.64125	0.95818	0.93064	1.05366	0.68308	0.77551	1.11698
1.75823	0.92937	1.06081	0.84836	0.76893	1.85626	0.75174	0.83565	0.37388	1.37679
1.09401	0.74864	0.83848	0.87139	1.8546	1.60301	0.97753	0.93579	0.74308	1.0024
0.85071	0.84325	0.85192	0.95157	0.66092	1.48187	0.81941	0.80869	0.79132	1.55714
1.2496	0.94941	1.66958	1.37732	0.95035	1.78189	1.09287	0.85962	0.89537	1.09255
1.47716	0.91643	0.95237	0.78253	0.80266	2.01616	1.05531	0.93339	0.87899	1.1926
1.90415	1.07564	0.88491	0.9006	0.87346	2.02335	0.51756	0.91905	0.81303	1.09341
4.53111	1.08673	0.89074	1.0885	0.85688	1.16029	1.02628	0.85298	0.62194	1.14273
1.08714	2.37882	0.96959	1.0844	0.88085	1.56707	0.86405	0.68997	0.76902	1.53536
1.08094	0.78718	0.98737	0.60294	0.88419	1.82698	0.86686	1.01116	0.62791	0.9591
2.42141	0.73278	1.01834	0.77194	0.71433	1.80883	0.70943	0.69149	0.78475	1.14064
0.92762	2.93064	1.01889	0.78302	1.24302	1.5337	0.91397	0.62608	0.52381	1.26922
1.15929	0.28473	1.20832	0.7951	0.64605	1.58633	0.65186	0.76909	0.79484	1.16257
2.56441	1.00538	0.85337	1.27031	0.91274	1.25075	0.94091	0.55142	0.69148	1.13018
1.01804	0.95815	0.80815	1.00334	0.64364	1.87647	0.73559	0.63808	0.68552	1.39986
1.07375	0.9616	0.92647	0.58124	0.65296	1.26114	0.74966	0.79061	0.9295	1.19059
1.14399	0.74495	0.92963	0.71686	0.88103	1.86382	0.90419	0.5716	0.66686	1.4278
0.97897	0.83864	0.92985	0.8678	0.7813	1.67455	0.84862	0.65344	0.74556	1.66486
0.92614	0.76428	1.07346	0.61929	0.37189	2.0091	0.68016	0.88127	0.56462	0.81001
1.33507	0.80013	0.92313	0.86053	2.16313	1.82941	0.79957	0.90975	0.59132	0.61147
0.94419	0.92392	0.96014	0.98779	0.46661	1.88215	0.50009	1.01349	0.89976	1.22777
0.85052	0.96121	1.09393	0.88126	0.9027	1.90106	0.7884	0.76595	0.67604	0.83168
1.23305	0.7993	0.76845	0.77362	1.26019	1.80179	0.80523	0.73506	0.58237	1.13355
0.92818	0.59325	0.90418	1.55371	0.69822	1.4203	0.63703	0.7624	0.45325	1.50632
0.79349	0.86589	1.19359	0.63091	0.65821	2.13879	0.81509	0.89468	0.51416	1.87818
0.88039	0.90334	0.49828	0.61635	0.33159	2.72632	0.76517	0.75747	0.71927	0.81349
1.17045	0.77685	0.46882	1.24679	0.67908	1.58345	0.68061	0.87559	0.42989	0.92528
0.78034	1.04001	0.64647	0.7908	0.72891	1.64694	0.88798	0.94733	0.57034	0.62547
1.20398	0.9915	0.44929	0.89586	1.97395	1.74765	0.39023	0.57868	0.69974	0.64224
1.40475	0.94016	0.91248	0.81571	0.82073	1.58678	0.68106	0.90889	0.86527	1.07763
0.91503	1.07938	1.12212	0.8825	0.64326	1.38454	1.16771	1.05426	0.69387	0.70244
1.04397	1.3009	1.02042	0.52832	0.75187	1.63718	1.19876	1.02585	0.78821	1.10449
1.23464	0.76231	0.91483	0.85669	0.78481	1.57161	0.86466	0.85873	0.79651	1.17566
0.67854	1.01705	0.90805	0.99386	0.55036	1.51572	0.74334	0.65133	0.36071	0.87982
1.09598	1.00066	0.88247	1.15572	0.66886	1.85605	0.93434	0.95365	0.67525	1.39083
1.06546	0.78616	0.94447	0.75772	0.6794	1.60526	0.69276	0.54758	0.75216	0.93214
1.02595	0.7232	0.87249	0.87142	0.70685	1.95839	1.40492	0.54213	0.72484	1.07011
1.20546	0.84071	1.00855	0.7156	0.68037	1.85937	0.81386	0.67407	0.551	1.65046
1.04307	0.75847	0.94508	0.78167	1.15541	1.7777	0.9811	0.91403	1.42248	1.27946
1.24205	1.06005	0.91024	0.70481	1.36141	1.97084	0.90664	0.94383	0.65977	1.11489
1.08753	1.04732	0.66965	0.99115	0.5422	1.8575	0.58217	1.02454	0.41348	1.16824
1.05069	0.71372	1.03091	0.72448	0.75396	1.84216	0.60062	1.04185	0.58889	1.37594
1.01521	0.95866	0.68247	0.70512	0.93501	1.6652	0.83639	1.17195	0.90101	1.02876
1.14961	0.94838	0.93153	0.81743	0.82076	1.70673	0.90226	0.93809	0.2272	1.13863
1.17114	1.21305	1.00845	0.97408	0.68212	2.16591	0.9836	1.07462	1.02661	1.2501
1.17845	0.69261	0.89142	0.91195	0.75026	1.36437	0.94452	0.8339	0.42711	1.04479
2.22607	1.08998	0.87599	0.6942	0.92606	1.91166	0.90365	1.21753	0.59783	1.02622
0.96332	0.88006	0.86358	0.53399	0.80306	1.83582	0.71995	1.02605	0.84865	0.85872
0.88772	0.50127	1.09034	0.90432	0.66369	1.57681	0.71777	0.89961	0.55772	1.12602
0.94921	1.17087	0.84336	0.89145	0.68494	2.11257	1.23956	0.68123	0.58266	1.73568
1.01262	0.93608	0.98983	0.93834	0.84158	1.8243	1.12785	0.938	0.72051	1.29003
0.99013	0.51318	0.8239	0.73799	0.76506	1.97541	1.43916	0.43072	0.61138	1.50054
0.80963	0.45614	1.62151	0.75615	0.7408	1.47624	1.53268	0.93374	0.80417	1.30814
1.30464	1.01447	0.65521	0.6891	1.0112	1.85189	0.74944	0.81929	0.87929	0.9825
0.63654	0.99346	0.83187	0.82983	0.76716	1.58355	0.98209	0.77349	0.71422	1.08397
1.2077	0.62309	0.90491	0.76199	0.5692	1.46754	0.77642	0.52929	0.70132	1.99051
1.02586	0.94246	0.92362	0.50943	1.19265	1.74436	0.95233	0.75521	0.67122	1.42641
0.99419	0.72734	0.89747	1.60984	0.94905	1.49787	0.90421	1.27375	0.76755	0.79818
0.85096	0.87092	0.87448	0.84693	0.94607	1.69359	0.70497	0.99935	0.76388	1.34551
0.83518	1.06704	0.8072	0.8555	0.82799	1.51017	0.88244	0.54465	0.72039	1.26461
1.0818	0.56779	1.00249	0.9326	0.65917	1.62884	1.44386	0.81548	0.81698	1.20088
1.29791	0.7779	3.75366	0.736	0.83781	1.50294	1.14622	0.8156	0.6577	1.27644
0.94911	0.87802	0.95146	0.92265	0.95886	1.52996	1.619	0.72573	0.70878	1.21882
1.18831	1.02747	0.9882	0.86018	0.86852	1.85071	0.73883	0.64508	0.7351	2.58827
0.77546	0.87314	0.89103	0.91424	2.89694	1.62629	0.85121	0.46334	0.65259	0.78098
0.5971	1.13003	0.99741	0.69111	1.45854	1.15471	0.94364	0.92723	0.58732	1.30334
1.30253	1.01736	0.80087	0.63055	0.65706	1.5573	0.82841	1.01398	0.76331	1.26654
1.19149	2.4045	0.914	1.09352	0.91489	0.62938	0.80544	0.72959	0.74706	1.02709
1.20791	1.89377	0.92454	0.89534	0.82332	2.02251	1.03996	0.97915	0.70664	1.24749
1.1044	0.77327	0.85541	0.84481	0.69795	2.49378	0.97426	0.85002	0.67297	1.15625
1.33	0.92605	1.0021	0.74557	1.18574	1.89273	0.92652	1.00908	0.42724	1.31908
1.02349	1.0064	0.90131	0.84644	0.86496	1.55299	0.59375	1.15168	0.52804	1.13085
0.79838	0.8256	0.93733	0.74439	0.95118	1.8106	0.86494	1.11739	0.63129	1.4118
1.14365	0.76858	0.94761	0.7898	0.73758	1.93735	0.73765	0.89864	0.17899	1.11695
0.78033	1.05488	0.88771	0.87172	0.73147	1.32364	0.81127	0.86893	0.60846	1.32127
1.00181	0.96365	0.92051	0.69637	2.05766	1.8786	0.77036	0.50015	0.4723	0.89583
1.26146	0.90234	1.27825	0.99685	5.446	1.54595	0.85359	0.75709	0.47391	1.23926
1.7457	4.11876	0.67819	0.86342	0.75609	1.50823	0.76497	0.78305	0.5669	1.32368
1.11123	0.87725	0.8024	0.84686	0.98522	1.69477	0.91823	0.80677	0.68103	1.00666
1.0307	0.98454	0.88272	0.48032	0.91422	1.65258	1.43162	1.1138	1.11793	0.80607
1.18441	0.85553	1.13862	0.75841	0.45975	4.15747	0.8545	0.4704	0.8306	1.51312
1.03212	1.85743	0.86324	1.88151	0.671	1.5009	1.36977	0.94676	0.84387	2.30315
0.94012	0.85712	0.81113	1.30003	1.96145	1.63138	0.8886	0.7532	0.6809	1.2616
1.02242	1.10945	0.90418	1.04799	0.54136	1.78686	0.53486	0.69687	0.6585	0.85012
1.09532	0.70042	0.82708	1.91294	2.21292	2.11439	0.66499	1.13895	0.50995	1.1347
1.05476	0.76885	0.83621	1.09879	0.57095	1.48961	1.04954	0.6408	0.79014	1.05022
0.91188	0.84628	2.66374	1.17934	0.59451	1.96952	1.05364	0.91426	0.62169	1.2814
1.89966	1.03709	1.06922	0.81463	3.25987	1.70566	0.63816	0.82044	0.55683	1.05889
0.49475	0.71468	0.97874	0.76124	0.79011	1.70358	0.9269	1.11891	0.70738	1.36319
0.71143	1.19793	0.93595	0.58249	0.80599	1.74464	0.64785	1.08914	0.73791	0.56185
1.98928	0.79704	1.01228	0.78246	0.76866	1.97515	0.97297	1.07337	0.93504	1.09976
1.41398	0.85194	1.03356	0.98531	0.47113	1.64429	0.79331	0.94095	0.59414	0.8282
1.76183	0.85894	0.83199	0.93924	0.70248	1.75476	0.69904	1.05334	0.67578	0.8949
0.9119	0.91453	0.6978	0.7299	0.79362	1.75415	0.79036	0.92719	0.62963	1.23322
1.07515	1.11899	1.02845	1.79021	0.88139	1.97606	0.7397	0.42976	0.83405	1.3083
1.00559	1.11466	0.88006	0.66691	1.01102	1.87944	0.81618	0.98647	0.82089	1.19586
1.04254	0.68362	0.96113	0.795	0.80168	1.68414	1.02976	0.81868	0.67206	0.88514
1.05288	0.93451	0.9159	0.50668	0.66727	2.09305	1.0641	0.96196	0.78915	0.90037
1.06924	0.78288	0.95432	0.85252	0.64244	2.00243	0.9627	1.2282	0.58699	1.46353
1.10049	0.62939	1.00119	0.82453	0.77233	1.83642	0.74271	1.0378	0.24573	1.06945
0.67608	0.84499	1.06878	0.75957	0.95199	1.99386	0.97078	0.98365	0.54943	0.82587
0.95525	1.11266	0.771	0.56152	0.72391	1.20838	0.92121	0.73339	1.0402	1.2592
1.06671	0.77662	0.9639	0.64692	0.80369	1.93459	0.75069	0.84503	0.71266	1.25105
1.7514	0.87224	0.99418	0.53212	1.28646	0.77467	1.02693	0.95486	0.65436	1.232
1.08703	0.91011	1.00321	0.88276	0.78039	1.88397	0.90988	0.74208	0.74687	1.20533
0.92895	0.82044	1.07154	0.63465	0.82311	1.87938	1.14376	0.71736	0.52273	1.38358
1.13251	0.73776	1.00476	0.88929	0.65869	1.81752	0.86821	0.7227	0.52329	1.05269
1.17928	0.92395	0.69239	0.81153	0.99103	1.76321	0.93209	0.69909	0.79892	1.86946
1.11613	0.90958	0.62117	0.99308	0.72838	1.65923	0.87442	0.93781	0.72508	0.77628
0.93183	0.38515	2.12833	1.08017	0.67762	1.61005	1.01045	1.12972	0.67489	1.36185
1.20369	1.06396	0.87038	0.703	0.69112	1.35149	0.95824	0.66609	0.682	1.01212
1.18021	0.95132	0.88145	0.45535	0.50394	1.84377	0.85444	0.98037	0.82473	0.56879
1.19043	1.11221	1.08793	0.62453	1.34898	1.74255	1.13195	1.14378	0.38528	1.43071
0.87273	0.82592	0.89986	0.81313	0.65436	1.50261	0.68678	0.47628	0.65677	1.33512
1.04485	0.60841	1.07764	0.68069	0.75173	2.45027	0.74967	1.1812	0.92037	0.85762
1.12955	0.90068	0.89755	0.93135	0.83695	1.55374	1.01445	0.56047	0.65136	0.9492
1.44732	1.19711	0.92925	1.03376	1.4005	1.47112	0.79109	0.79688	0.72183	1.57989
1.11023	1.0125	1.01631	1.12391	1.80311	1.85585	0.91339	0.46257	0.38894	1.04518
1.22309	0.79057	1.0722	0.89812	0.61636	1.35774	1.02969	0.93363	0.56771	0.81767
1.11507	0.77352	0.83135	0.72664	0.84872	1.25791	0.76899	0.63093	0.78548	1.02366
1.2811	0.83877	0.92779	1.10286	0.85207	1.58376	1.03314	0.84	0.73622	0.82443
1.08172	1.01344	0.9401	0.75987	0.83825	2.14194	1.11903	0.8122	0.92876	1.20807
0.76756	1.14745	0.96452	0.543	0.82152	1.48109	1.28027	0.7009	0.82227	0.8698
1.19279	0.98938	1.00484	1.39996	0.71393	1.84907	0.50288	0.52384	0.72927	1.27476
0.94116	0.89929	0.86572	2.25438	0.81418	1.88879	0.56793	1.37109	0.46799	1.44295
1.29073	0.81889	0.93323	0.70703	0.74972	1.12923	0.33506	4.75072	0.39739	1.11938
2.66775	1.09475	0.86452	0.88717	0.67385	1.887	1.00901	1.10079	0.515	0.83965
0.9898	0.85329	0.83408	1.22752	0.72593	1.77091	0.75279	0.8705	0.821	1.03958
1.89209	0.85706	1.09349	0.57733	0.74191	1.74735	0.66371	0.95318	0.42298	1.29801
0.75663	1.14911	0.93755	0.62647	0.90968	1.71035	0.93755	0.84364	0.73153	0.8185
1.08655	0.84054	1.11398	1.36479	0.68543	1.72741	0.49839	0.97811	0.71849	1.09568
1.15662	3.44876	0.81852	0.66543	0.71163	1.58453	1.08141	0.7585	0.68534	1.30699
1.17064	1.82662	0.45981	0.84134	0.47537	2.07882	0.86344	0.84773	0.60101	0.89656
1.14935	0.45692	0.7635	0.91668	0.63369	1.58804	1.02042	0.8697	0.90458	0.89782
0.86617	0.74735	0.80161	0.78363	1.20475	1.81707	0.74209	0.94142	0.62181	0.94953
1.21018	0.8833	0.94754	0.8015	0.82413	2.6937	0.63755	0.80044	0.4497	1.37617
1.14743	1.08269	0.97527	1.23679	0.55274	1.82575	0.67135	0.95964	0.61756	1.26503
0.92186	0.681	0.83079	0.85772	0.74721	0.60236	1.53568	0.82395	0.88521	0.92682
0.98461	0.78856	0.97174	0.85834	0.78931	1.70376	0.91558	0.66425	0.79625	0.99093
1.20502	0.7274	0.84693	0.65227	0.87367	2.06328	1.03828	0.91909	1.02896	2.19146
0.97505	0.97692	0.6898	0.69019	0.88622	1.95458	0.71371	0.5345	0.50207	1.20025
0.97433	0.79341	1.09411	0.93025	0.52141	2.05846	1.05119	1.12448	0.61141	0.97555
1.29127	0.85503	0.90867	0.7277	1.81439	1.98955	0.93848	0.74642	0.53015	1.12102
0.77223	0.68711	0.83017	0.92933	1.01068	1.89233	1.10716	0.8634	0.75722	1.01075
1.40971	0.75846	0.94106	0.63182	0.70661	1.85507	0.76293	0.78533	0.58068	0.91742
0.89927	0.94364	0.88242	0.93712	0.76095	1.58203	0.91674	0.8763	0.87948	1.25472
0.93678	1.02584	0.85225	0.81456	0.45447	1.71951	0.80854	0.80693	0.91095	1.146
1.29964	1.03771	0.70286	0.61626	0.77094	1.56487	1.24542	0.77613	0.86691	1.2584
0.94249	0.95413	0.93252	0.74827	0.68834	1.8665	1.00876	0.56507	1.21645	0.96666
1.19548	0.78751	0.91072	0.82427	0.71488	1.83424	1.12325	0.96892	0.4831	0.83817
0.61554	0.79068	0.92592	0.86646	0.61723	1.86518	0.93001	0.96122	0.91484	1.24018
2.64055	0.83514	1.05402	0.88055	0.39436	1.65467	0.85914	0.80861	0.54201	1.29913
1.01418	0.67	1.12283	1.08497	0.75776	1.85946	0.81433	1.06178	0.6234	1.1867
1.00808	0.67344	0.89275	1.23275	0.91712	1.40883	0.66917	0.65188	0.75983	0.94604
1.13147	1.95263	1.21516	0.95204	1.29626	2.03589	0.78646	0.81265	0.73866	1.39166
0.72726	0.99813	0.87758	0.63098	0.73249	1.9305	0.86083	0.96585	0.62589	1.58114
1.07089	0.81696	0.77251	0.70005	1.9284	1.65181	1.03257	0.76183	0.33179	1.28344
0.81053	0.91843	1.03216	0.5902	0.53578	1.74026	0.7029	0.80706	1.03015	0.9738
1.00844	0.91828	0.84034	1.85719	0.83164	1.82843	0.87431	0.95826	0.64582	1.23377
1.00722	2.11822	1.73943	0.87423	0.99094	1.77317	0.6205	0.64234	0.7855	1.10213
0.87241	0.82972	0.82979	1.26163	0.79114	1.95807	0.91164	0.71415	0.5016	1.27858
0.9414	0.63431	1.37979	0.71315	0.73689	1.6174	1.31057	0.79726	0.93701	1.31121
1.08176	0.72073	0.88114	0.93268	0.89112	1.57517	0.95584	0.9296	0.58776	1.40206
2.55806	0.7527	1.03391	0.74429	0.79098	1.73773	1.23893	0.90776	0.60406	1.6294
1.02328	0.83803	0.95033	0.89198	0.94234	1.81703	0.87899	0.78847	0.55753	1.31247
1.15551	0.97398	0.95966	1.0468	0.819	1.82846	0.54246	0.98916	0.77831	1.20694
0.84901	0.88631	0.69419	0.79205	0.8975	3.53829	0.99504	0.8006	0.10806	0.52562
0.88606	0.82294	1.01577	0.75024	1.03602	1.84043	1.00477	0.78786	0.55473	1.29937
0.84131	0.81723	0.98326	0.841	0.71289	1.59265	0.99482	0.67883	0.76345	1.27071
1.04827	1.84209	0.81628	1.00924	0.49828	1.69377	0.88225	0.59506	0.77163	1.17654
0.87844	0.49564	0.74333	1.04517	0.46835	1.5972	0.76927	0.66326	0.54966	0.95244
1.20011	0.38948	0.81496	0.71113	1.5788	1.27342	0.42108	0.93393	0.7046	1.61247
0.90803	0.68903	0.76427	1.41785	0.58009	1.82972	1.013	0.68513	0.63116	1.31104
2.60668	0.85772	1.09199	0.85013	0.62814	1.78529	0.97673	1.00597	0.81331	1.12011
0.99596	2.13883	0.85744	0.91456	0.72416	0.99312	1.0631	0.4991	0.66213	1.28113
1.05167	0.92628	0.68885	0.75003	0.82642	1.04409	0.91637	1.70133	0.38718	1.24521
1.75881	0.57591	0.894	0.66209	0.68554	1.98962	1.04726	0.96119	0.8535	1.1879
0.94027	0.6559	0.91668	0.8054	1.05716	1.70618	0.83781	0.82253	0.66435	0.92865
0.95505	2.14584	0.92751	0.91372	0.95881	1.54959	0.58056	0.86969	0.449	1.20008
1.07026	0.68373	0.94764	0.95411	0.68048	1.53978	0.69361	1.01246	0.4756	0.5984
1.76816	0.97008	0.87625	0.59508	0.79982	2.06109	0.6861	0.87738	0.77655	0.87316
0.92778	0.56468	1.00347	0.75612	0.60423	2.05378	0.98117	0.94095	0.27108	1.45676
1.0364	0.92274	1.55226	0.76336	0.85194	1.79478	1.37214	0.81954	0.63794	1.04105
1.03136	1.33468	0.89508	1.5119	0.53876	1.8715	0.44673	0.86815	0.52561	1.16539
0.98725	1.03684	0.67481	0.6201	0.84645	1.77865	0.65959	0.98065	0.92318	1.07757
1.08948	0.89679	0.94151	0.91042	0.70185	1.44659	0.92258	0.79897	0.60642	0.89114
0.99769	0.84829	1.27027	0.65581	0.81177	1.84877	0.89187	0.78288	0.60222	1.30168
1.56019	0.90394	0.83584	0.38956	1.42165	1.86417	0.87905	1.03722	0.88225	1.20426
0.62125	1.12272	1.045	0.66346	0.75732	2.08472	0.93833	0.75245	0.54622	0.58565
1.08409	1.17924	1.02007	0.75878	0.96353	1.72191	1.18139	0.49491	0.70249	1.46202
0.55535	0.79373	0.87093	0.68409	0.87923	1.91081	0.81252	1.02492	0.62747	1.1288
1.13298	0.74448	0.688	0.82265	1.57723	1.20073	0.81081	0.36799	0.57517	1.11491
0.99141	0.83193	1.01122	0.90565	0.86036	1.59174	0.57208	0.96118	0.6402	0.93701
1.19908	0.7843	1.98915	0.68532	0.67417	1.15374	0.78707	0.66054	0.69537	1.17308
0.65668	0.82338	0.88549	0.76755	0.67873	1.84115	0.5705	0.90367	0.717	0.77912
0.76115	0.88562	0.68002	0.66663	0.73098	1.66752	0.97105	0.669	1.52592	1.43672
1.12218	0.9372	1.12461	0.79747	0.44853	1.11834	0.9937	0.75165	0.88451	0.99522
0.97044	1.33012	0.7968	0.74095	0.86535	1.77353	0.91111	0.84963	0.76745	1.64704
0.86921	0.9989	1.27556	0.6927	0.75661	1.63476	0.83107	1.04978	0.82119	0.98402
1.00216	0.75464	0.85719	1.38336	0.83422	1.87341	0.87154	0.63088	0.7148	1.20028
1.12668	0.71505	0.93067	0.83583	0.81059	1.78755	0.88486	0.85879	0.57811	1.34429
1.08055	1.02617	0.57591	0.75905	0.80805	1.85401	0.74753	0.84825	1.76086	1.17216
1.17657	0.72888	1.00691	0.92005	0.77698	2.12253	0.8689	0.72926	0.80696	1.30168
1.18123	0.87144	0.79405	0.74483	0.77565	1.52084	1.04599	0.76956	0.57576	1.01814
0.80857	0.88418	1.30342	0.83582	2.21564	2.03302	0.85306	0.73808	0.7727	1.20074
1.30732	0.95649	0.88311	1.96901	0.77807	1.61598	1.0279	0.89035	0.69141	1.19934
1.07009	0.94719	0.78584	0.80832	0.63919	1.76165	0.95	0.86026	0.55032	2.03888
1.07993	0.88085	0.90411	0.49796	0.8913	1.84818	0.7758	1.09848	0.5317	1.42086
0.86968	1.08331	0.91319	1.55367	0.65936	1.74689	0.81966	0.27461	0.66392	0.8822
0.97336	0.71525	0.9696	1.08753	0.72708	1.88436	1.0053	0.94839	1.01017	1.56945
1.00246	0.74169	1.00146	0.54095	0.94498	1.61638	0.7173	0.65095	0.3751	1.54157
1.19997	0.75428	1.04734	2.07266	0.77494	2.01035	1.21816	0.64191	1.02881	1.12805
0.89838	0.73171	0.69569	0.4845	0.78955	1.88722	0.94511	0.9342	0.84268	1.13168
1.50416	1.23842	1.12571	0.78935	2.25334	1.35571	0.53185	0.76081	0.6943	0.81599
1.22485	0.79844	0.99645	0.69059	0.61483	1.93946	1.03063	0.68562	0.57849	1.1332
1.03956	1.46137	0.8353	0.78429	0.59629	1.35253	0.92846	0.6435	0.67113	1.0654
1.40632	0.8093	0.99684	0.97898	0.71419	1.93711	0.68212	0.7541	0.67577	1.43656
0.89439	0.69894	0.92963	0.55463	1.86517	1.77828	0.87103	0.85663	0.72132	1.23657
1.03876	1.98363	1.11387	0.87339	0.8337	1.74585	0.37126	1.73257	0.73672	0.96102
1.0134	0.74148	1.55164	1.0193	0.75421	1.91216	0.55975	0.81831	0.41642	1.295
1.00313	0.70327	0.87496	0.70583	1.84579	1.96607	0.98309	0.63932	0.7532	1.15841
0.93272	1.79982	0.79989	0.82293	2.29089	1.84358	0.82702	1.70198	0.53851	1.42178
1.06022	1.11089	0.86583	1.50644	0.91879	1.97067	0.97901	0.7832	0.88962	1.39629
0.75521	0.78742	0.82587	0.72278	0.61774	1.62292	0.5882	1.1646	0.75735	1.40489
0.57811	2.27576	0.88831	0.98283	0.76577	1.9961	0.98185	2.02468	0.5647	1.15235
1.69827	0.89646	0.65044	0.81647	0.82538	1.76882	0.89882	1.03921	0.8288	0.93782
0.70507	0.88604	0.80475	0.67626	0.9225	1.79459	1.31941	0.47928	0.59203	1.2442
0.96705	0.86393	1.29397	1.35283	1.29537	1.96337	0.94087	0.64453	0.88372	1.75159
1.40876	0.62497	0.90998	0.7679	0.70044	1.43853	0.52468	0.824	0.6003	1.57529
1.10889	2.69244	0.88854	0.71673	0.7326	2.42615	1.03771	0.53502	0.94931	0.84649
0.76999	0.55976	0.85833	0.81024	0.62943	1.80817	1.64128	0.83612	0.84133	1.44268
1.038	0.83849	0.95657	1.61691	0.73851	2.06449	0.93723	0.83717	0.72039	0.91197
1.07821	0.99623	2.42844	0.65167	2.07681	2.12026	0.74062	0.76334	0.79763	1.38304
1.24523	0.71452	0.994	0.76905	0.72468	1.94773	0.91649	0.76015	0.67451	1.02333
0.93869	1.01252	0.91747	0.79796	0.77693	1.36351	0.71189	0.85204	0.73716	0.97476
1.25125	1.00087	1.20784	0.99633	0.88717	1.87916	0.76063	0.72637	0.91359	0.9113
0.93127	0.46938	3.25945	1.30781	0.68649	1.86821	0.6263	0.50373	0.54542	0.50134
1.02978	0.70441	0.81982	0.94455	0.89716	1.17301	0.64606	0.77772	0.4906	0.80174
0.67214	0.77909	0.95652	0.85046	0.93233	1.66411	0.7876	0.98662	0.83832	1.8107
1.40924	0.86602	1.04721	0.81512	0.88189	1.88563	0.75498	0.95605	0.61712	0.34062
0.77793	1.07728	0.81967	0.63589	0.77232	1.85525	1.03716	0.68774	0.76496	1.56216
1.17496	0.95893	0.8419	1.07862	0.64803	1.9036	0.42266	0.52185	0.78757	1.18997
1.85776	0.88756	3.70129	0.87545	0.69892	1.78112	0.68877	0.74755	0.76791	0.87294
1.13517	0.98062	1.03077	1.3631	0.71603	1.76073	1.05273	0.72578	0.97329	1.27338
1.42734	1.85254	0.91394	0.89211	0.69032	1.34094	0.50516	0.77691	0.7493	1.28697
1.44441	0.88867	0.96938	0.71992	0.89397	1.54704	0.87425	0.81446	0.42806	1.14364
1.15223	1.00734	0.85332	0.65888	0.73805	1.80324	0.83471	0.78997	0.79366	1.1227
0.70561	0.8469	0.99389	1.15865	1.43045	1.89776	0.81089	0.77619	0.82858	1.79022
0.85608	0.90978	0.98422	0.71799	2.11601	1.5062	0.97356	0.91287	0.79613	1.47808
0.67879	0.88594	0.69059	0.58843	0.38702	1.92856	0.62677	0.95241	0.72421	1.09163
1.17159	0.99229	0.87094	0.74652	0.79192	1.65507	0.98384	0.92962	0.80803	1.15186
1.00493	0.87781	0.91688	0.90938	0.73621	1.37282	1.83718	1.07172	0.89952	1.09655
0.95687	0.82139	0.89981	0.84653	1.04432	0.70002	0.92999	0.9732	0.50943	1.38239
1.16408	0.89247	1.02486	0.95256	0.95662	1.91417	0.72957	0.41671	0.90556	1.53643
1.11211	0.76576	0.95501	0.85959	0.71393	1.46502	0.85982	0.69858	0.69505	0.879
1.04633	0.8933	1.02015	0.70504	0.6683	1.2702	1.11705	0.99017	0.79814	1.15268
1.67548	0.89612	0.82017	0.91795	0.63869	3.23128	0.94132	0.78287	0.83815	1.09127
0.96951	0.7944	1.13928	0.76964	0.65257	1.75052	0.8314	0.85599	0.8237	0.80528
1.10351	0.89095	1.46245	0.72751	0.73825	1.6422	1.46865	1.14701	0.44466	1.22873
1.1196	0.94723	0.99962	1.30279	0.6993	1.7366	0.84408	0.67835	0.61335	1.20589
0.94325	1.12924	0.91126	0.75374	0.70494	1.78678	0.81752	1.07123	0.58345	1.02573
1.60163	1.64426	0.76498	0.65091	0.93273	1.68379	1.00108	0.77483	0.91053	0.9941
0.96746	0.95152	0.93082	0.86213	0.51706	1.74874	0.78355	0.60525	0.58516	1.08408
0.92419	0.89235	0.8663	0.69497	0.73732	2.78999	0.99399	1.01511	0.64798	0.9748
1.25439	1.18765	0.95322	0.97881	0.73594	2.27063	0.92482	0.76606	0.72256	2.17321
2.15175	0.61529	0.7337	0.71056	0.59422	1.61683	0.89712	0.88632	0.85745	1.16839
1.20966	1.17242	1.05448	0.9204	0.69117	1.51128	0.78511	1.07958	0.47349	1.13378
0.67262	0.99562	0.66134	0.63872	0.90486	1.98726	0.96084	0.68451	0.6967	1.07654
1.17057	1.3165	0.8626	0.58196	0.92723	1.72077	1.27491	1.06181	0.45546	1.11522
1.01991	1.02037	0.76776	0.96694	0.74732	1.91004	1.15951	0.85952	0.81682	1.34715
1.17484	0.84685	0.87583	0.57887	2.28495	1.88861	0.96052	0.78028	0.84798	1.20469
1.1577	0.95918	0.8075	0.91788	0.89119	1.41554	0.86008	0.86041	0.74357	1.17484
1.15936	1.01149	0.60424	0.89327	0.95508	1.90419	0.72883	1.04647	0.7934	1.85282
1.04508	0.82584	1.08536	0.96542	0.9392	1.97013	0.71613	0.69373	0.68677	0.78204
1.04931	1.30508	0.84529	0.93087	0.83245	1.54083	0.9245	1.01251	0.71701	1.16942
1.11733	1.11765	1.13001	0.76699	0.65079	2.03663	2.44994	0.71373	1.15332	1.13025
1.03366	0.80346	0.9534	0.81649	0.65973	1.52519	0.92785	0.68928	0.77588	1.14738
1.05765	0.71906	1.60563	0.84208	0.88838	1.40315	0.50103	1.06619	0.47129	1.44674
1.06178	0.92978	1.04571	0.83057	0.70671	1.74526	0.60602	0.92116	0.86344	1.18298
0.5531	0.99505	0.90765	0.69122	0.82649	1.72887	1.33955	0.71834	0.29948	0.92491
0.69302	0.9689	0.90029	0.60982	1.21583	1.66744	0.95999	0.5433	0.79219	1.0409
1.01134	0.72614	0.88729	2.55281	0.96461	1.71769	0.96751	0.83711	0.77861	1.67584
1.09544	1.08291	0.75401	0.97614	0.82056	1.95666	0.86047	0.96136	0.81187	0.79883
1.18284	1.07769	0.96269	0.64435	0.83412	1.90669	1.02362	0.59748	0.99436	1.12657
0.91307	0.91452	1.00458	0.98629	0.76477	1.99266	1.07066	0.55677	0.59881	1.26325
1.88271	0.78527	0.92104	0.52436	0.72975	1.22188	0.96259	1.01146	0.53616	1.26415
1.11563	0.89064	1.06183	0.7536	1.17821	1.94327	1.54381	0.94298	0.52077	1.38213
0.89547	0.92424	1.08903	0.71	0.65325	1.74087	0.59198	0.82379	0.84377	1.0508
1.03637	1.00891	0.89383	0.82515	0.7786	1.9984	0.79761	0.72078	0.83874	0.96482
1.07491	1.09988	0.89391	0.78089	0.65876	1.88746	0.81158	0.89982	0.77145	1.24742
1.18712	0.73366	1.90535	0.49395	0.4938	1.80588	1.45168	1.06638	0.77412	1.17588
0.97279	1.02788	0.99408	0.94215	0.6048	1.50637	0.94806	0.96028	0.93061	1.60602
0.95195	0.7987	0.77485	0.68836	1.51838	1.62435	0.87622	0.68179	0.78597	2.12437
0.92638	1.16332	0.91884	0.57727	0.74619	1.93576	0.74616	0.70793	0.78311	1.07404
0.71629	0.83383	0.8923	0.84355	0.67917	1.74264	0.84094	0.58653	0.30638	0.50991
1.38174	1.08101	0.88021	0.88187	0.73516	2.06312	1.06579	0.89692	0.65817	0.86505
0.92235	0.66598	0.93755	0.79314	0.70884	1.91288	0.71398	0.69556	1.12137	1.00205
0.91277	0.57672	0.86809	0.79106	1.50337	1.79699	0.61977	0.75876	0.5179	0.97504
1.14739	1.09129	1.12212	2.04415	0.6699	1.64107	0.79197	0.8412	0.73012	0.79326
1.29637	1.03318	0.9535	0.96117	0.85544	1.89204	1.09537	0.66522	3.82697	0.97723
0.98413	1.01142	0.92742	0.62407	1.05934	1.64867	0.44692	0.65779	0.50866	1.55309
1.13259	0.78762	0.88901	0.80317	0.86429	1.49782	0.72233	0.76248	0.77053	1.14685
0.92481	1.0401	0.93005	0.87803	0.8356	1.71378	0.86723	0.91414	0.70463	0.87459
1.20627	0.98474	0.8366	0.62789	1.04479	1.85284	0.84457	0.84531	0.77551	1.19126
1.06011	0.92866	0.82392	0.94968	0.51094	1.79208	0.83706	0.87188	0.40257	1.09744
0.96488	0.72968	0.85296	1.72776	0.82376	1.7467	0.711	0.87589	0.66446	1.20581
0.85651	1.03423	1.37406	0.64671	0.86935	2.09084	0.99016	0.79091	1.0024	1.36048
1.20277	0.90778	1.05259	0.65839	0.83625	1.69876	1.1201	0.88675	0.72722	1.32393
1.01919	1.07625	0.85345	0.72885	0.71254	1.28451	0.55768	0.73746	0.52104	1.38343
0.61301	0.63192	0.98479	0.48297	0.52101	1.92868	1.1403	1.1809	0.99444	1.062
1.59089	0.88581	0.93486	0.60982	0.802	1.88425	0.77434	0.89589	0.76645	1.36956
1.64262	0.91944	0.89548	0.53168	0.83286	1.83901	1.16079	1.06843	0.42833	1.39839
0.91578	0.98793	0.99084	0.79927	0.81361	1.45456	0.88178	0.87934	0.68927	0.89831
1.05398	0.63863	0.89958	0.85286	0.78175	2.53488	1.04519	0.4776	0.70792	1.41973
2.69484	1.0552	0.8109	0.83395	2.26934	1.77298	0.70128	0.60055	0.9839	1.04598
0.91415	0.89577	1.03823	0.73817	0.87985	1.89755	0.68634	0.56391	0.78456	1.80165
0.92971	0.86917	0.89568	0.99539	0.66047	1.78617	1.13265	0.61571	0.59103	1.01285
1.25453	0.75981	0.84586	0.9343	0.73256	1.9336	0.74053	0.91968	0.72474	1.07072
2.33522	0.98126	0.92928	0.99388	0.84386	1.38182	1.0379	0.73096	0.60604	1.01618
2.0535	0.96209	0.75441	1.05564	0.88958	2.08297	0.84131	1.02551	0.78309	1.37465
2.29756	1.02766	0.79498	0.87937	0.83955	1.89693	0.85555	0.91719	1.00959	1.08538
1.14866	1.3122	1.02037	0.58385	0.63555	1.86636	0.54391	0.9042	0.79767	1.16262
1.39152	0.87556	1.03263	0.81515	0.63733	1.70334	0.8474	1.21888	0.75666	1.08327
0.77172	0.71589	0.87786	0.68196	0.74108	1.79027	0.95821	0.95705	0.96494	1.50249
0.99598	0.68857	0.76005	0.87284	0.51835	1.2819	1.01876	0.92724	0.38643	0.9371
0.99773	0.89866	0.76012	0.45507	0.65693	1.74612	0.87962	0.75671	1.1399	0.95507
0.97417	0.8988	1.0586	0.89263	0.85796	1.52115	0.73883	0.7738	1.08387	1.13962
0.87879	0.89086	0.96349	0.66654	0.83035	1.40318	0.83469	0.7964	0.73197	1.12606
1.03589	0.96157	0.84808	0.48088	0.73002	1.53913	0.91817	0.88839	0.72983
0.87042	0.77313	1.20375	0.79286	0.69444	1.66063	0.70384	0.53955	0.73368
1.08684	0.86007	1.01198	0.91544	0.69047	1.97783	1.18378	0.65138	0.52432
1.16701	0.82175	0.96716	1.3597	0.6382	1.87579	0.78523	0.72105	0.87272
1.24979	0.88893	0.83681	0.80113	0.71935	1.64177	0.7568	0.69347	0.62511
1.24505	1.13424	1.07687	1.01668	0.85615	1.84826	0.49488	0.71473	0.84669
1.10746	1.02501	0.95662	0.83944	0.9375	1.90712	0.82405	0.96695	0.43405
1.36124	0.87786	0.88653	0.61228	0.66651	1.6614	0.84986	0.85567	0.60656
1.66292	0.91019	0.73406	0.88042	0.55421	1.90531	0.62704	0.84858	0.70361
1.58003	0.7888	0.99035	0.73598	0.87054	1.7853	0.8732	0.79939	0.92121
1.30704	0.71241	0.92223	0.76228	0.88889	3.20407	1.2037	0.52045	0.68731
1.21656	0.86724	0.79161	0.82629	0.55441	1.86271	0.87202	0.72149	0.49563
0.99772	0.67749	0.9419	0.81001	0.83822	1.66246	1.07345	0.95185	0.72269
1.18054	0.8225	0.88802	0.94932	0.69181	1.80784	0.88908	0.91175	0.83436
0.91567	0.96209	0.94752	0.85543	0.77703	1.67684	1.12858	0.71876	0.56889
0.90058	0.79514	1.00002	0.92321	0.47231	1.5826	0.94854	0.76927	0.55216
1.16389	2.05389	0.9275	0.67754	0.72635	2.00454	1.21204	0.79718	0.48798
0.684	1.00007	1.04083	0.4282	0.88007	1.92357	0.84335	0.8692	0.71467
0.93159	0.90252	0.91326	0.86768	0.84811	1.65534	0.79267	3.62259	0.76886
1.06282	0.99325	0.96394	0.69422	0.61414	1.83718	0.99551	0.71078	0.58348
1.06302	0.95701	1.03831	0.75837	0.91856	1.59997	0.85155	0.81672	0.38388
1.1043	0.92355	0.87403	0.90135	0.83034	1.29731	0.57698	0.71283	0.85613
2.14739	0.93863	0.99104	0.66901	0.7896	1.76053	1.13427	1.21878	0.83606
0.84474	1.0118	0.87238	0.90451	0.72628	1.63418	0.86048	0.72774	0.7515
1.15163	2.68841	1.08328	0.83374	1.03761	1.94988	0.72956	0.85517	0.59901
0.96138	0.42372	1.22736	0.83921	0.83195	1.55254	0.68951	0.87238	1.26985
0.98869	0.73219	1.50315	0.69932	0.73102	1.7571	0.52333	1.21062	0.53103
0.90622	0.79363	0.73299	0.88852	0.78492	1.61889	0.90693	0.88184	0.62203
1.00706	0.84381	1.04285	1.26347	1.07602	1.61296	0.97847	0.57418	0.8763
0.95256	0.91401	1.63224	0.85491	0.74334	1.91992	1.00836	1.00258	0.83793
1.20155	0.78668	0.67476	0.7694	0.73307	5.66257	0.91432	0.89523	0.91776
1.2029	0.95058	0.78173	1.32705	0.59793	1.62721	1.04601	0.82008	0.81843
1.12406	0.94237	0.96148	0.77743	0.95067	1.78933	0.89623	0.73765	0.61216
0.82736	0.7416	0.73641	0.51982	0.69913	1.77692	0.79408	1.11623	0.67813
1.13498	0.58736	0.77002	1.12198	0.75182	1.73127	1.00541	0.85532	0.52181
2.01333	0.86739	0.82567	0.54537	0.87315	1.49549	0.70963	1.06474	0.5538
0.98617	1.08199	0.95804	0.96654	0.83111	1.44637	1.10137	1.02109	0.6449
3.25529	1.08001	0.99752	0.6453	0.74435	1.73741	0.8707	0.75741	0.68195
1.08211	0.84621	0.7148	2.16915	0.77515	1.8176	1.19339	0.89015	0.70416
1.62976	0.73115	1.16666	0.37553	1.24026	1.83747	0.80178	0.40975	0.74962
0.83196	0.95794	1.04445	0.7948	0.89021	1.96624	0.95298	0.71398	0.57951
0.99635	1.04567	0.97086	0.97899	0.71048	1.982	0.66731	0.60845	0.69589
1.23381	0.88754	0.69305	0.74099	2.0334	1.85482	0.69741	0.61661	0.89479
1.12052	0.94806	1.11444	0.79039	0.79248	1.88552	1.22034	0.99729	0.60338
0.8036	0.85055	1.07731	0.50372	0.66887	1.93312	0.72476	0.775	0.7132
1.00971	0.921	0.87661	0.6347	0.60054	1.73486	0.83826	0.95966	0.40663
1.00011	0.86904	0.63067	0.85642	1.08078	1.66322	0.8998	0.68449	0.48513
2.52169	0.74913	1.13723	0.81118	0.70606	1.75889	0.74628	0.91452	0.85835
0.61619	0.80981	1.00416	0.7269	0.50106	1.9021	0.77307	0.9482	0.40139
1.04106	0.86354	0.91187	1.18083	0.68519	1.58471	0.50982	0.55904	0.52823
1.09052	1.03937	0.95299	0.75908	2.05184	1.84983	1.10983	0.96776	0.762
2.43253	1.21249	0.89294	0.87864	0.83886	1.15433	1.21081	0.53703	3.15813
0.77781	0.20593	0.93858	0.90131	0.86963	2.10675	0.86658	1.1683	0.89541
1.03476	0.64511	0.73955	0.92336	2.0605	2.05997	0.78522	0.78736	0.45427
1.01683	0.66758	0.8669	0.75913	0.87005	1.63108	0.82884	0.66719	0.68963
0.98775	0.7069	1.23982	0.71239	0.74771	0.75482	0.87083	0.91194	0.69816
0.90027	1.00426	0.78549	0.95507	0.78984	1.54193	0.92707	0.94732	0.79489
0.98191	0.78626	0.85587	2.19238	0.70796	2.25414	0.90808	0.71312	0.6728
1.00868	0.51459	1.2925	0.78382	0.46438	1.53212	1.01981	0.66954	0.69842
0.81596	0.87809	0.77828	1.03594	0.73805	1.74799	0.83164	0.87764	0.64444
0.9266	1.50449	0.97865	0.66025	0.77523	1.47348	0.77659	1.06926	0.70623
1.0086	1.44965	0.9755	0.51854	1.08151	1.0558	0.81224	0.87627	0.4566
0.59103	0.69702	0.82881	0.89866	0.96178	1.51956	0.53688	0.91435	0.91292
0.72983	1.00718	0.93437	1.18664	0.86183	1.88481	0.85677	0.47801	0.58268
0.98581	0.90091	0.80785	0.94534	0.61273	1.74767	0.92495	0.81437	0.73099
1.02266	2.91874	0.76065	0.93477	0.59855	1.66062	0.93747	0.72878	0.87783
0.9796	0.82286	0.91393	0.69065	0.68606	1.88797	1.01533	0.64192	0.52439
1.09928	1.39834	0.83782	0.90797	0.92895	1.88006	0.85481	1.00382	0.76779
1.21706	0.82482	0.93602	1.59077	0.62318	1.95463	1.72435	3.90782	0.58831
0.92225	0.81273	1.02602	0.7503	0.76999	1.62118	0.80058	0.79933	0.76426
1.04713	0.93283	0.95959	0.65559	0.74749	1.84268	0.84792	1.00101	0.77163
2.44722	0.86574	0.83857	1.00822	0.48371	1.80758	0.71939	0.9346	1.01344
0.91281	0.98689	0.96177	0.77258	1.14289	1.94226	0.90749	1.4136	0.55943
1.05085	1.13532	0.79752	0.83751	0.62793	1.46279	0.88926	0.84757	0.999
0.91843	0.72595	0.94095	0.87453	1.06074	1.51908	1.02594	0.83889	0.76464
0.87303	2.39526	1.01652	0.63845	0.80338	1.79456	0.7189	0.86931	0.65389
0.8	0.92395	0.74666	0.85431	0.71937	1.66395	0.84059	0.88832	0.29062
1.00653	0.90887	0.82591	0.84995	0.6481	1.58331	0.84324	0.68669	0.53898
0.98472	0.9177	0.97767	0.95879	0.84501	2.02105	0.65235	0.91611	0.88334
0.8937	0.93528	0.86766	0.80592	0.77229	1.2933	1.06376	0.90173	0.58461
0.8746	2.37925	1.02101	1.05339	0.73149	1.75878	0.77655	0.74879	0.79542
1.07647	1.66768	0.77161	0.72769	2.26607	4.97209	0.77107	1.17164	0.76409
1.23562	0.99139	0.88318	0.68328	0.88719	0.79533	0.70725	0.87774	0.6498
0.67927	0.90314	0.87794	0.80715	0.63549	1.9342	1.21362	1.00635	1.23788
0.91191	0.71341	0.70201	0.80526	0.9418	1.99231	0.73297	1.38339	1.01159
0.68623	0.95313	0.91274	0.74896	0.86838	1.38017	0.87243	0.84282	0.22594
0.90844	0.78985	3.1324	0.89437	0.56273	1.59131	0.9316	0.96819	0.61864
0.83771	0.76577	0.93473	0.42142	0.66249	1.69511	0.86599	0.81418	0.54709
1.27009	0.62895	0.86604	0.98091	0.78026	1.94001	0.60135	0.81002	0.59516
1.05392	0.81225	0.86153	0.85662	0.86982	1.90539	1.18984	0.49411	1.00988
0.74622	0.61112	1.04257	0.84897	0.64532	1.69938	0.74456	0.65975	0.80425
0.94906	0.99419	0.86044	0.87646	0.81468	1.25046	1.0026	1.11288	0.67628
0.94444	0.72768	0.9441	0.94789	0.8978	1.87973	0.74476	0.93688	0.38911
1.00311	0.80406	0.9085	0.6957	0.99755	1.81925	0.88021	0.91097	0.8973
1.13349	0.96732	1.4271	0.73285	0.60095	1.93406	0.78113	0.69416	0.99648
0.91338	0.9815	0.92564	0.88454	0.76032	1.64495	0.95343	0.45675	0.3863
0.90616	1.01376	1.11398	0.63536	0.79813	1.78662	0.82392	0.95712	0.77809
1.35808	0.62979	0.76093	1.50051	0.80168	1.61818	0.59951	1.13649	3.21532
1.96133	0.84462	1.1432	0.94118	0.86492	2.23665	0.57086	1.08408	0.82864
0.9707	0.85744	1.08771	0.72782	1.05054	1.97601	0.61448	0.8696	0.82609
1.09417	0.99564	0.76105	1.01454	0.65621	1.60097	0.74271	0.72957	0.89391
1.07587	0.91901	1.04143	0.8416	0.65583	1.50937	1.03538	0.83038	1.79768
0.73977	0.69541	0.77181	1.51982	2.60423	1.77186	0.9104	0.85963	0.57675
0.98573	1.03068	0.80917	1.87361	0.79266	2.02267		0.6268	0.88609
1.48727	0.68238	1.23993	0.86219	1.26693	2.12779		0.5522	0.47266
1.84289	0.93598	1.00874	1.01781	0.82575	1.38834		0.77911	0.7941
1.8918	0.79059	0.98822	0.50981	1.67965	1.94678		0.81834	0.65913
1.18099	1.04275	1.01491	0.62807	1.02316	1.57334		0.86498	1.08099
0.78984	0.95499	1.41392	1.11265	0.8144	1.98202		0.75826	0.44088
1.15664	0.91013	0.88312	0.68402	0.81924	1.18395		1.10599	0.63377
0.82336	0.91291	1.04509	0.85254	1.10951	1.82759		0.78954	0.70977
1.23387	0.86	1.01754	0.81555	0.70913	1.82673		0.62913	0.85838
0.77586	0.89301	1.0095	0.73205	0.86707	0.84491		0.69513	0.34806
0.8756	0.80273	1.00866	1.49114	0.70656	1.76734		0.93455	0.77951
0.6705	0.61415	0.71177	0.85886	2.5176	1.8952		1.18031	0.70007
1.09389	0.72171	1.04272	0.67748	0.76338	1.54305		0.97639	0.79948
0.44693	0.76068	0.82552	0.54515	0.83322	1.53224		0.60441	0.65476
0.93641	0.81338	0.99316	0.90319	0.66303	1.90005		0.6667	0.6148
1.07312	0.87545	0.80064	1.73709	0.72852	1.76586		1.02284	0.63365
2.20184	0.85131	0.81263	0.85486	0.77553	1.98208		0.94453	0.92989
0.96552	0.94527	1.03936	0.8115	0.88221	1.85906		0.75351	1.153
1.49238	0.75885	0.8754	1.3455	0.60871	1.88231		0.60813	0.75519
1.15171	0.98804	0.8215	1.08073	0.45486	4.0425		0.86914	0.59345
0.87804	0.93404	0.62054	0.76093	0.73175	1.831		0.91683	0.39494
1.4233	0.86285	0.97411	0.8818	0.78245	1.51846		0.88345	1.05347
1.00916	0.81925	0.67601	0.6884	0.78417	1.77633		0.78277	0.97737
1.72381	1.2522	1.07461	0.65514	1.07084	1.53243		0.75948	0.70773
1.15672	0.75572	0.70685	0.77856	0.57432	1.3714		1.06878	0.91758
0.90488	0.96196	1.01017	0.81536	0.9295	2.08213		0.7877	0.65971
1.39667	1.16924	0.99005	0.83568	0.66457	1.90493		0.64689	0.60677
0.89714	0.78178	0.85102	0.80763	0.77244	1.99915		0.55758	1.02709
0.74452	0.76108	0.9475	0.99879	0.63169	1.98355		0.79474	0.82583
1.07235	0.87226	0.79753	0.72175	1.52859	1.84941		0.75627	1.499
1.00675	1.00968	1.01696	0.86559	0.6425	1.76791		0.62675	0.60597
1.07442	0.84901	0.89034	0.89695	1.28337	1.88748		0.76131	0.73503
1.15317	1.60561	1.16289	0.99743	0.67628	2.02769		0.82672	3.28902
0.86198	1.04685	0.73619	0.96836	0.94568	1.57023		0.82187	0.87303
1.31034	0.94109	1.02198	0.90352	0.9865	1.77919		0.80937	0.77779
1.00648	0.72681	2.01306	0.38303	0.90705	1.61156		0.95419	0.81027
2.09057	1.10715	0.98294	0.87788	0.70027	0.88685		0.93475	0.70646
1.04995	0.94368	1.03769	0.63732	0.90422	1.49555		0.79693	0.85617
1.29183	0.9535	0.92943	0.66207	1.04201	1.93084		0.81868	0.54359
0.83023	1.11001	1.02221	0.93191	0.81916	1.6248		0.64902	0.60592
0.85555	0.78382	0.86742	0.72904	0.45443	1.13562		1.24529	0.61698
0.72532	0.82282	0.66514	0.74013	1.05892	1.79951		0.98501	0.80154
0.7552	0.85946	0.86525	0.69031	1.66691	1.74309		0.78021	0.54218
0.88767	1.11876	0.61771	1.50551	2.61665	1.88676		0.73398	0.84885
1.24459	1.02186	0.90159	0.90077	1.08477	1.98024		1.19647	0.63371
1.17344	1.13224	0.62834	0.89742	0.5157	1.56066		1.21534	0.63899
0.92824	1.15454	0.88845	0.54762	0.82458	2.12996		0.56471	0.66204
0.74339	0.63626	1.01004	1.7947	0.9112	1.66697		0.69373	0.31985
0.77079	0.68747	0.91891	0.90891	0.77121	1.79239		0.92487	0.57071
0.98665	0.57108	1.01427	0.67574	1.91084	1.64162		0.60158	1.20839
1.23472	0.8522	0.9358	0.78394	0.73064	1.91188		0.76878	0.61601
0.80474	1.01993	0.72286	0.85109	0.72008	0.99778		0.6361	1.00289
1.00124	1.79767	0.62086	0.88079	0.71943	1.85925		1.04133	0.58486
1.17994	0.85311	0.89026	1.95334	0.93663	0.83247		1.09162	0.58058
0.92462	1.00308	0.8546	0.80941	0.60696	1.96126		0.84589	0.44529
0.67203	0.79859	1.39808	0.67643	0.93289	1.01712		0.86706	0.76972
1.01176	0.74682	0.90984	0.71584	1.04333	2.33339		0.85491	0.72164
0.64352	0.97247	1.07212	0.82349	0.85619	1.53234		0.98449	0.69407
1.69917	1.0068	0.75738	0.46818	0.54854	1.70416		0.94412	0.70252
0.94264	0.9012	0.7849	0.92972	0.37535	1.93653		0.86211	0.6645
0.84866	1.06228	0.98512	1.68257	0.90793	1.8924		0.81554	0.88005
0.71316	0.71454	0.50252	1.01068	1.78823	1.60996		0.90135	0.7419
1.96525	0.85572	0.92905	0.85521	0.67486	1.53592		1.11072	0.43922
1.13051	0.93379	0.99266	0.74784	4.82206	1.40529		0.98801	0.92704
1.16295	0.94551	1.0751	0.69294	0.74736	1.88911		0.63293	0.91024
1.05408	1.07333	0.74485	0.44526	0.60514	1.82819		0.88541	0.4462
1.15269	0.39408	0.84361	0.91532	0.76595	1.6368		1.03326	0.63306
0.96031	1.00764	0.94046	0.83197	0.69774	1.61449		0.76685	0.62173
0.86645	0.77984	0.99532	0.69858	0.50514	1.81886		0.50097	0.80822
1.22923	0.91447	0.99103	0.73708	0.87613	1.62837		0.72329	0.80995
0.94825	0.8633	0.9223	0.84436	2.19408	1.80063		0.59223	0.8567
1.05925	0.65758	0.8883	0.84763	0.73012	2.09653		0.8453	0.71897
1.19148	0.97216	0.93777	0.8437	0.9498	1.53424		0.87835	0.56289
0.94634	1.17588	1.24627	0.5163	0.72377	1.487		0.58627	0.53148
1.53617	0.9179	1.0273	0.81471	1.04548	1.36413		0.59793	0.4223
0.85268	0.82057	0.94797	0.78391	1.88491	1.90573		0.93726	0.74518
1.59118	0.89825	0.94007	1.48498	0.33626	1.92268		0.94397	0.75482
0.92703	0.95024	1.0155	0.84266	0.60131	1.64864		0.99216	0.70812
0.93407	2.63532	0.76325	0.80789	0.78965	1.53294		0.75069	0.63344
0.62704	0.91118	0.92588	0.78901	2.62697	1.73273		0.52887	0.72643
2.01971	0.76138	0.95667	0.77123	0.83723	1.64297		0.50519	0.76894
0.9176	0.88602	0.85674	0.73099	0.63427	1.69112		0.83364	0.52665
1.3495	0.94023	1.08484	0.59106	0.71581	1.46572		0.8503	0.61391
2.17472	0.94064	1.4426	0.61777	0.57617	1.71446		0.76513	0.77985
1.1664	1.07832	0.9542	0.77962	0.82127	1.16233		1.16144	0.67369
1.04969	0.85093	0.98344	0.83295	0.79474	1.70541		0.97317	0.49743
0.78242	1.07514	0.92819	0.87741	0.80435	1.88282		0.87657	0.80907
0.91637	1.82841	0.90655	0.89573	0.47072	2.041		0.94253	0.57844
1.15759	1.65729	1.03673	0.96237	1.112	1.26273		0.987	0.29064
0.87263	0.88545	0.90282	1.04815	0.92399	1.89556		0.88817	0.83353
1.65312	0.99298	0.98119	0.77807	0.94572	1.67719		0.74314	0.622
[truncated: 5,538 more rows]

## Sheet: NAD_mito
Control	FK866	Metformin	Phenformin	Rotenone	Oligomycin A				Control	FK866	Metformin	Phenformin	Rotenone	Oligomycin A
1.34181	1.79134	2.6621	0.9466	0.90762	1.82499			min	0.338601	0.829335	0.448937	0.554798	0.514297	0.215012
0.79809	1.08153	1.13936	0.97747	1.10677	0.67664			25th	0.850197	1.32196	0.934008	0.925802	0.937651	1.30985
0.96857	1.46412	1.09897	1.00361	0.74042	1.61843			median	1	1.47677	1.0834	1.03133	1.06682	1.63054
1.12577	1.57539	1.07365	1.13021	1.34806	1.58473			median	1	1.47677	1.0834	1.03133	1.06682	1.63054
0.66818	1.46783	0.85969	0.83133	0.66741	1.39604			median	1	1.47677	1.0834	1.03133	1.06682	1.63054
0.84412	1.21301	0.91721	0.99775	0.91777	1.5657			75th	1.19126	1.65037	1.25739	1.17314	1.21989	2.03974
0.93746	1.71479	1.34143	1.26386	1.06717	1.65488			max	1.70286	2.143	1.74246	1.54414	1.64324	3.13457
0.69217	1.48047	1.47317	1.05523	1.11299	1.38314
0.94204	1.63042	1.05583	1.03301	0.7522	1.7788
1.19427	1.35169	1.65486	1.06292	1.41132	1.60402
1.00565	1.45694	2.5661	0.81675	1.1088	2.81848
1.48598	2.31068	1.40777	1.08808	1.16433	1.45006
0.71023	1.87135	1.0721	0.76187	0.84199	1.46122
1.94111	0.87702	1.41544	1.25071	1.13838	1.10878
2.59988	1.60901	1.71195	1.1298	0.91995	1.24389
1.27563	1.30733	2.01514	1.27463	1.00132	1.54978
2.07519	1.33573	1.0982	1.21998	0.86221	1.4297
0.68263	1.55035	1.17014	1.39643	1.04391	1.56061
0.81098	1.81367	0.10222	1.28625	1.35501	2.51089
1.4048	1.26603	0.81317	0.96094	1.0187	1.77174
0.87007	0.99512	0.91272	0.79055	0.90445	0.99834
0.77378	1.13508	1.45606	0.9895	0.91635	1.95497
0.82131	1.22069	1.19474	1.23354	1.10995	2.35167
1.51857	1.60302	0.7975	1.60745	1.30092	1.60124
1.25455	1.59317	1.53406	0.93104	1.1102	1.57951
1.06485	1.40858	0.63927	1.00009	1.14075	2.33284
1.12741	1.54891	1.47877	1.05979	2.08373	1.14072
0.79826	1.21055	3.26756	1.65857	1.0026	1.30679
0.82944	1.58045	1.52148	0.96776	1.01833	1.47917
1.30204	1.22347	0.90429	1.41371	1.3861	1.12169
0.85218	1.56205	2.19602	1.10814	1.33033	1.36284
0.6614	1.87473	1.69616	1.51423	1.15577	1.3214
0.80106	1.58414	0.79275	0.95885	1.22419	2.15253
0.62158	1.68874	0.95502	1.29402	1.31064	1.45983
0.71914	1.83059	0.89089	0.90605	1.42539	2.05902
0.7476	1.83539	1.25941	1.00438	0.93741	1.71528
1.00752	1.65684	0.90131	1.01201	1.05996	2.26543
0.88839	1.80013	1.08137	1.19149	0.97042	1.76843
0.93688	1.69898	0.84499	1.28225	1.21929	1.13983
1.19999	1.42394	1.09816	1.21715	0.89509	2.36497
0.85548	1.6825	0.94353	1.21277	1.30395	1.89519
0.92835	1.31565	1.75443	0.89692	1.13897	2.59165
1.21878	1.14913	0.91673	2.40311	1.13185	0.39936
0.6137	1.58038	1.05847	1.18422	1.10777	2.02908
1.13854	1.40418	2.19849	1.46736	1.13026	1.51706
0.79077	2.80866	1.27712	1.07284	0.83909	1.21168
0.94283	1.37735	0.85638	0.81866	0.99148	1.45836
0.73538	2.08923	1.1948	1.04883	0.95075	1.08451
1.31414	1.34178	2.45542	1.06355	1.83813	2.73803
0.8511	1.92127	1.30797	1.35876	1.17227	2.41466
1.1951	1.36798	1.19542	0.7788	0.99881	1.03446
1.01844	1.43734	1.03131	0.96246	0.89317	3.54128
0.92228	1.75029	0.95492	1.01868	0.70455	1.30693
1.17924	1.83898	0.81853	1.01779	1.30148	1.12569
1.55331	1.32531	0.70414	0.97557	0.87152	0.99809
1.01538	1.40368	1.21888	1.20259	0.99878	2.45086
1.22804	1.25405	1.01212	1.48151	0.87099	0.91143
1.13325	1.5043	1.72778	1.14896	2.21881	1.50915
1.05168	1.50047	1.08156	1.36824	1.28098	2.02195
0.85555	2.47291	3.17897	1.01113	1.20852	1.53315
1.29536	1.12762	1.02136	0.88768	1.12262	1.25631
0.99021	1.46019	0.9618	4.6492	1.01974	2.1031
1.28443	1.85051	0.96605	1.04531	0.95309	2.31053
1.18718	1.56483	1.19718	0.80952	1.16772	1.93866
0.99707	0.29752	1.13805	1.02124	1.18367	1.24459
1.35748	1.67387	0.99523	0.93456	0.95757	2.3979
1.05501	1.40801	1.0763	1.37943	0.94408	2.4023
0.86565	1.45491	0.95977	1.12085	1.24198	2.41808
0.75213	2.56304	1.11315	1.06167	0.8117	1.87208
0.73775	1.42048	0.93541	0.99924	1.13101	1.62598
0.74962	0.56297	1.44049	2.91869	1.11198	2.04839
1.18453	1.29911	0.89617	1.18541	1.17049	0.95415
2.52623	1.46486	0.9208	0.7538	1.10578	1.24094
1.32824	1.44101	1.23547	1.07415	1.11817	1.29908
0.90538	1.44376	0.93097	0.92115	1.20424	1.41569
1.35774	1.67899	1.18086	1.11528	1.1584	1.1995
1.04357	1.5154	1.10146	1.04427	1.19344	2.64009
3.80719	1.24803	1.01615	1.89324	1.58175	1.79586
1.06591	1.43985	0.96812	0.76186	1.08405	2.23904
1.12764	1.6932	1.30793	3.14766	1.14279	0.80858
1.2843	1.78632	0.91174	0.85899	0.97699	2.35829
0.93579	0.85975	0.94043	1.09913	0.79066	1.32675
0.74491	1.7999	0.76437	1.3094	1.07802	1.05962
0.81021	1.391	0.87946	1.2016	0.93594	1.27859
0.64567	1.67484	1.12466	1.00782	1.21462	2.26098
1.17615	1.71662	1.33068	0.94663	1.23327	3.25706
0.8776	1.38737	0.9767	1.08744	1.26542	1.70333
0.84413	1.50596	1.19779	1.24686	0.98626	2.02762
0.86963	1.42076	0.9808	3.25714	0.98765	1.9628
0.94146	1.61324	0.70084	0.7974	1.00693	1.69646
0.8351	1.37642	1.00312	1.03632	0.95537	1.83465
1.00894	1.13978	1.30492	0.89445	2.17636	2.28443
0.9147	1.42451	3.60168	0.798	1.19956	1.40966
0.97821	1.33116	1.18701	0.84112	5.29737	1.39242
0.86853	0.42576	1.19459	0.70122	0.7606	2.11631
0.76709	1.22782	0.69983	3.57162	0.89121	1.44457
1.03035	1.74024	0.61165	3.40922	1.035	1.83072
1.20278	1.28428	1.43492	1.084	0.95817	0.88867
1.06513	1.682	1.48278	0.58551	1.12602	1.37326
0.74283	1.72105	1.07522	5.32799	0.97195	1.66139
0.9921	1.09646	1.34294	1.10198	0.93635	0.61149
1.02609	1.58526	1.00898	1.07976	1.6922	1.14721
1.27107	2.07985	1.03795	0.83598	1.27553	2.23912
0.99532	1.2888	1.13897	0.99305	0.96819	1.26864
1.36131	1.32347	1.00566	1.07208	1.3	2.07512
1.83546	1.22473	0.9093	1.10395	1.11529	1.28694
0.90261	1.32576	0.86556	0.85195	0.25227	1.65292
0.73804	1.53012	1.20572	0.99394	0.51818	1.17157
1.03575	0.73127	1.20881	0.83274	1.10888	2.37414
1.2933	1.16883	1.1737	1.26477	1.02743	1.80171
1.19053	1.52858	1.30303	0.81677	1.10231	1.25955
0.90797	1.13816	1.14059	1.08431	0.46322	1.85946
0.67474	1.25615	1.45509	0.87711	0.55195	1.34992
0.84975	1.46399	1.54581	0.8206	1.04233	2.30383
1.10281	1.18491	1.12412	0.90888	1.22076	3.36095
0.83997	1.26016	1.08422	1.34859	0.81401	1.75713
1.23317	1.26634	0.75539	0.91254	1.24584	1.76533
0.80373	1.42917	1.41023	0.94859	1.01407	1.7136
0.71636	1.12087	1.05559	0.77321	1.09587	1.72732
0.96455	1.38884	1.19407	0.64067	0.97368	0.99429
0.77128	1.47666	0.60528	2.02652	0.99202	2.83163
0.88003	1.50721	1.23885	2.81146	1.32675	2.4122
0.79634	1.12012	1.08458	1.30858	0.9917	1.29206
1.07593	1.80909	0.87197	1.08688	1.32983	0.72261
3.27668	1.29984	0.85557	0.96379	1.22442	1.72949
1.37471	1.21309	1.0339	0.87583	1.08589	1.83353
1.00973	1.16773	0.87271	0.73654	1.12121	1.41864
1.21556	1.35642	0.99551	0.9957	1.07519	1.79442
1.10705	1.29688	1.10008	1.02483	1.04115	1.22769
1.06972	1.40788	2.27871	1.05547	1.17098	1.7842
0.90356	1.5526	1.18248	1.22785	0.89368	1.99679
0.98424	1.41191	1.64825	0.92859	1.38533	2.28912
1.22712	1.59248	1.10532	1.02979	1.06395	1.5053
1.03114	1.36189	0.72233	1.20396	1.02118	1.70295
0.92532	1.38591	0.95798	0.74278	1.18422	1.82477
0.78653	1.33859	1.08112	0.95702	1.21169	1.24778
1.10053	1.28402	1.00502	1.13418	0.61367	0.84584
0.77757	1.22119	1.65122	1.09402	1.35735	0.77311
1.19835	1.44983	1.17592	1.0651	1.70532	1.98529
0.84617	1.39181	1.45928	1.09446	0.46465	1.84831
1.50423	1.69005	0.62573	1.07654	0.54749	1.28124
1.05644	1.7547	0.85207	0.95956	1.05409	1.2888
1.79905	1.34974	1.11806	1.06753	1.19922	1.56274
0.8471	1.25923	0.98297	0.83258	1.04706	1.58303
1.2719	1.8477	1.18136	1.11751	1.195	1.59965
1.03317	1.33549	1.1957	1.03872	1.9875	0.9503
1.17672	1.6956	0.88491	1.1099	0.97681	1.37648
1.46766	1.6077	1.29411	1.17728	2.08408	1.65363
1.62654	1.58752	1.1636	0.98381	0.96604	1.86484
1.15188	0.92211	1.33631	1.18406	1.20432	1.24617
4.94243	1.40464	4.63886	0.92316	0.91904	1.02031
0.82875	1.20926	1.23699	1.16092	0.80423	1.35354
1.15887	1.93259	1.08125	1.03569	1.13526	1.30444
1.492	1.14564	1.14956	0.9032	0.78989	1.4385
1.12435	1.38349	0.60298	1.1577	0.98111	1.25579
0.78397	1.18356	1.24869	0.98186	0.77778	1.55474
1.0121	1.6238	1.12919	0.86576	1.53838	2.30031
0.82805	1.68677	1.03114	1.13908	1.17583	1.27863
0.83211	1.78817	1.20489	1.14545	1.07143	2.06751
0.68416	1.45913	1.91304	0.94404	1.06405	1.68815
0.69182	1.66549	1.42686	2.39542	0.92022	2.42587
1.10672	1.258	1.28058	2.39368	1.40631	1.82807
2.89895	1.54871	1.08783	1.01367	1.3258	1.64562
1.28695	1.25038	1.14323	0.95126	1.04622	1.39696
0.82034	1.42788	0.7871	0.79481	0.67161	0.565
1.17842	1.37584	1.10213	1.15751	0.8179	0.89155
0.94004	1.44183	1.34438	0.95904	1.16143	1.64269
1.28596	1.50376	0.8988	1.10228	1.52488	1.42718
1.0287	1.75171	1.14826	1.01585	0.73746	1.38389
0.97512	1.37971	0.92951	1.32709	1.15773	0.78727
0.99042	1.2315	1.01096	1.15365	0.98367	2.03574
0.77564	1.43004	0.91463	0.8874	0.90441	1.41042
0.71272	1.44145	0.87094	0.89928	1.23873	1.00996
0.90694	1.36183	0.99556	0.86749	1.11358	1.88944
0.77197	1.92808	1.15047	0.99487	1.24195	1.48938
0.84622	1.9303	1.37967	0.9252	1.15423	2.40345
0.68961	1.46162	0.7308	0.79493	1.07397	1.39219
1.403	1.45844	0.69206	0.89382	1.11173	2.66514
0.8103	1.10359	1.10196	0.84041	0.96912	1.55332
0.80102	1.3269	0.88786	0.96029	0.84395	1.77809
0.57769	1.58813	1.13883	1.13549	3.33742	1.24108
1.06532	1.39183	0.69279	1.06955	0.87766	1.95485
0.95534	1.06539	1.28515	1.09043	1.09046	2.50103
0.69964	1.53039	3.09608	0.80802	0.83623	3.07191
1.13258	1.43189	1.22105	0.97115	1.27436	2.64212
0.88017	1.18725	3.46699	1.16626	1.05756	1.49415
0.74866	1.18118	0.88988	1.92081	0.9848	1.27769
1.04664	1.78068	0.99671	1.38426	1.28311	0.97582
2.70917	1.24795	1.57419	1.45701	0.89823	1.36661
3.77785	1.85393	0.59279	1.10482	0.88019	1.40674
1.00541	1.63443	1.06611	1.01803	1.51637	2.509
0.83605	1.25728	1.13377	1.15451	1.21109	1.21
0.75484	1.67221	1.10122	2.87745	1.21413	2.11896
0.91288	1.34459	0.97401	1.24843	1.10325	1.34131
0.80503	1.06012	1.31183	1.05627	1.03526	1.7921
1.26109	1.35993	0.84697	0.9499	1.19024	1.35473
1.12695	1.44516	2.06468	1.20633	1.24576	1.68385
0.86135	1.56921	1.10062	0.92689	1.09345	1.25435
0.91391	1.38714	1.15631	1.02045	1.31814	1.49525
0.78876	1.36782	1.07922	0.82773	1.28636	1.60694
0.65731	1.6729	0.9661	1.01336	0.41916	2.52195
0.83967	1.55087	1.14553	0.90126	1.28041	1.45185
1.32879	1.31733	0.94087	5.25719	0.89139	1.52802
1.13395	1.16867	0.92737	0.88575	0.96066	2.62822
0.72492	1.40097	1.17387	1.20333	0.97594	1.17787
1.55008	1.32012	1.17155	0.90834	0.48879	2.07758
0.78875	1.70016	1.17892	1.09734	1.15476	1.18301
1.06734	1.71853	1.20005	1.25316	0.97339	0.94851
1.20308	1.6365	1.20448	0.83731	0.61353	0.8234
1.18617	1.63642	0.38364	1.1311	0.94064	1.56817
1.20673	2.28326	0.49074	0.87651	1.63741	0.51335
1.26145	1.42848	0.86446	1.85182	0.96235	0.52017
0.94318	1.84791	0.87684	0.97341	0.98275	1.85499
0.77975	1.54293	0.79328	1.03419	0.96993	1.23946
1.61605	1.61443	0.87761	1.18417	1.54932	1.58731
0.45182	1.78152	3.87088	1.18901	0.91793	1.87996
1.00296	1.83596	0.99535	1.19594	1.65961	2.16263
0.90526	1.48033	1.06474	1.15146	1.2884	3.58838
1.09724	1.81389	0.96404	0.8369	0.7435	3.12808
0.72625	1.50497	1.08722	1.01397	1.69434	1.61964
1.16079	1.39021	0.88848	1.41527	1.27434	1.51688
3.04643	1.56358	1.1372	1.03668	0.78872	1.32069
0.7827	1.32027	1.1027	1.01627	1.02376	2.06132
0.96292	1.34159	1.00709	0.93374	0.42707	1.59877
0.76129	1.53784	1.38642	0.91229	0.59044	0.43615
1.2832	1.47513	1.34418	1.00046	1.22456	2.03331
0.97792	1.79885	1.05598	1.07837	1.09903	5.22426
1.05118	1.99411	0.85629	0.92764	1.05389	1.51143
1.02999	1.63145	1.31232	0.99233	0.93069	1.81024
1.20785	1.68678	0.70304	0.72802	0.35029	1.69246
0.72131	1.30408	0.69133	0.85884	1.03315	2.03714
1.19273	1.4033	1.08127	1.14483	0.80285	2.05903
0.80377	1.64394	0.75744	0.85518	1.13045	3.87807
1.17739	1.71149	1.35279	1.25883	1.09123	1.3822
0.77005	1.62643	0.96274	0.81242	1.00871	0.80196
0.71789	1.37162	1.17979	0.839	1.27859	2.26412
0.89388	1.48527	3.83552	0.99567	1.32941	1.36291
0.93094	1.54517	1.19171	0.85026	0.78345	2.58619
0.70361	1.47487	1.00826	1.38162	1.21559	1.93249
0.96944	1.47682	0.68947	1.15554	1.05563	1.72248
0.89897	1.57235	3.32673	0.89173	0.993	2.32626
1.15113	1.58644	1.75578	0.88154	1.11507	1.79995
0.6549	1.73369	0.85037	1.25923	1.01267	0.68831
0.94035	1.67855	1.30854	1.49251	1.09693	1.76972
2.09049	1.22736	1.33132	1.18844	1.63044	1.55107
1.33706	1.4625	1.18593	1.20158	1.0358	0.55044
0.80433	1.28492	0.65003	1.36961	1.12708	1.53171
1.03763	2.36077	0.90415	1.0874	1.03596	1.4572
0.92798	1.47903	1.85783	0.90694	1.41955	1.31396
1.04705	1.53846	1.03417	0.93152	1.37874	2.2437
1.72102	1.3643	0.97655	1.55629	0.94871	2.11547
0.9376	1.59741	1.41339	0.84704	0.94921	2.09989
0.94646	0.97473	1.11166	1.25087	0.95346	2.50589
1.04736	1.62624	1.35641	1.0094	0.87685	1.59939
1.34368	1.44207	1.18077	0.9827	1.71393	1.20037
0.90017	1.68782	1.49336	1.42494	3.49787	0.83309
0.97589	1.56522	1.31497	1.16213	1.11294	1.57513
1.30757	1.29631	1.13831	0.80726	1.10801	2.25161
1.01286	1.60674	0.98671	1.28977	1.05145	1.69015
1.14675	1.74195	0.898	1.13558	1.09784	2.59726
1.10271	1.45355	0.85582	1.72333	0.96757	2.32002
1.01067	1.17296	1.43703	1.07584	1.55474	1.21825
0.94087	1.99083	1.07847	0.91488	1.25713	1.47839
0.43116	0.46189	0.82843	1.01701	0.33948	0.81833
1.26324	0.22037	1.24498	1.10887	1.66918	2.08972
1.67209	1.34988	0.34779	0.96509	1.06656	2.48415
0.69088	1.70898	0.78255	1.07664	0.98897	2.10143
0.74273	1.03735	1.11435	1.46876	1.54259	2.33927
0.9768	1.37407	1.56156	0.8347	0.94656	1.17929
0.98688	2.15359	1.07723	0.93888	1.58221	1.33105
0.88067	1.62155	1.03144	1.58532	1.13069	1.18177
1.22597	1.7896	1.02486	0.83673	0.96414	1.53375
0.88615	1.97935	1.86557	1.09371	0.964	1.34355
2.09344	1.33121	1.02959	0.78838	1.17609	1.54368
0.76937	1.40508	1.08356	1.06618	1.30649	2.52165
2.29637	1.80431	1.16847	1.0164	0.91079	0.92999
1.03039	1.7976	1.19398	0.87477	1.1775	2.07789
1.07104	1.5878	1.2468	1.39495	1.13769	2.77911
0.78307	1.57225	0.96194	1.46969	1.1204	1.49232
0.76084	1.86788	0.95445	0.9246	0.41924	1.26531
0.77822	1.17481	1.23449	1.30079	1.34362	1.17504
0.77463	1.48401	0.93535	0.94837	0.82838	1.46546
0.79609	1.30615	2.37627	0.92198	0.86275	2.72298
1.0922	1.76555	1.29233	1.65181	0.941	3.58169
1.03241	1.3494	0.96104	0.80071	1.01761	1.32315
0.80182	1.67851	0.94275	0.71404	1.09318	1.46873
0.82562	1.74022	0.84113	0.95882	1.06786	1.78089
1.05327	1.33999	0.81436	1.30656	1.31808	1.10405
1.00671	1.62069	1.18689	1.10708	0.88751	2.71244
1.24625	1.56846	1.32803	1.07156	0.99178	1.45573
0.97005	1.29482	1.1357	1.14102	1.25343	1.90083
3.70583	1.23826	1.42089	1.0321	1.04265	0.491
0.82438	1.25647	0.66125	0.85345	1.52971	2.02454
0.87488	1.62381	1.02628	1.21689	1.00521	0.9793
3.3605	1.55418	1.35446	0.95051	1.86476	1.82956
1.13473	1.47393	1.37554	1.11269	0.81189	2.26471
1.12473	1.55076	1.26541	1.66833	0.85358	1.00158
1.03074	1.6311	0.97108	1.00183	1.15136	0.50677
0.78235	1.05657	1.12247	1.16416	1.27502	3.3825
1.06747	1.13401	0.96004	1.06527	1.11668	2.14936
3.07078	1.37015	2.57478	1.18688	1.37492	0.59289
0.65228	1.25466	1.22206	0.82825	1.30885	1.47984
0.87397	1.35181	1.24723	1.75231	1.21096	2.03147
1.01199	1.74552	1.11368	0.89763	0.67546	2.36662
0.7967	1.15715	0.94477	1.45352	0.69359	1.80938
0.90718	1.82366	0.33529	0.81838	1.51293	1.66989
0.96774	2.03451	0.89771	0.82221	1.08518	1.6593
0.7973	1.68681	2.35159	0.98953	0.30511	2.10887
0.66848	1.17265	0.87558	1.02533	0.44733	1.5181
0.95296	1.3506	1.0836	0.84151	1.09449	2.86775
0.74498	1.45574	1.0906	1.14897	0.83849	1.70057
2.05544	1.5275	1.06523	1.30389	1.30047	1.377
1.1176	1.51103	1.11325	1.00816	1.41939	0.77574
1.08671	1.27529	0.57407	0.97258	1.11016	1.89053
1.56023	1.42689	0.87103	1.12685	0.52003	1.42085
1.08196	1.44965	1.36521	1.04645	1.04733	2.55619
0.74553	1.73912	1.27776	0.8229	0.95751	1.21402
1.44751	1.37904	0.77899	0.9794	0.87532	1.20626
0.75986	1.52058	0.93354	0.85341	0.97522	2.14998
0.71422	1.66753	0.8423	1.12571	1.22216	3.47316
0.9299	1.52633	1.35429	1.23502	0.89633	1.03388
0.98517	0.24964	1.26294	1.30254	0.90666	1.74054
1.14156	1.34305	1.04123	0.87355	2.30468	1.59947
0.59168	1.57339	1.23972	0.66781	1.25834	1.2965
1.65214	1.2619	1.04904	0.97295	1.24345	1.87887
0.8798	0.30091	1.2018	0.97153	1.12197	2.19197
1.30811	1.13732	0.96746	0.8953	1.01452	1.35779
1.00303	1.47536	1.85275	2.9907	0.87848	2.03402
0.85605	1.22329	0.90435	1.00927	0.98001	1.39504
1.15934	1.41687	1.32563	1.03376	0.90861	0.77447
2.2767	1.54293	0.99657	0.9283	1.15812	0.3785
1.16134	1.62362	1.00814	0.95777	1.06244	2.77492
0.77481	1.10409	0.91702	1.00869	0.6131	1.2104
0.93156	1.43724	0.86182	0.87989	0.87462	1.13279
1.03897	1.33918	0.79851	0.8205	0.81971	1.22079
1.14695	1.54388	1.29639	1.08774	1.14119	1.60385
0.98726	0.61001	1.26131	0.99448	0.93092	1.65667
1.22221	1.40721	1.08367	0.98579	0.95597	1.85495
0.74373	1.47561	1.30639	1.02889	1.0545	1.55274
0.97272	1.30207	1.01827	1.10032	1.12838	1.1821
1.27732	1.53458	1.37357	0.79022	1.18591	1.59422
1.457	1.30841	1.13627	1.27493	0.88903	1.23962
0.71593	1.308	1.10549	0.81986	1.44359	2.13468
0.99168	1.26213	1.47563	1.02459	1.73946	1.64565
0.82165	1.80599	1.52888	1.08202	1.06275	1.35775
1.00622	2.17142	0.79284	1.20626	1.35824	1.81249
1.21536	1.26872	1.21376	1.02265	1.04311	1.5698
1.08872	1.43828	0.77053	1.07099	1.3002	3.01167
1.15041	1.7571	1.04569	1.44314	0.98806	1.30767
0.9802	2.15455	1.17221	1.25103	1.40907	2.49852
0.84999	1.1551	1.26348	1.49965	0.91276	1.56957
3.79892	1.5715	1.33066	1.11718	1.1879	1.00647
1.04509	1.52836	1.50808	1.01235	1.1091	0.75678
1.21863	1.49569	1.33523	2.09887	1.56159	1.98046
1.06275	1.77653	1.17389	1.11348	0.7664	1.80937
1.00702	1.91524	1.1586	1.07125	0.81287	0.41707
0.96087	1.42028	1.07341	0.93836	1.25612	1.46994
0.96756	1.13934	1.3894	0.91276	0.92933	1.65359
1.32666	1.45246	0.62304	1.55421	1.3338	4.55764
1.0733	1.37563	1.00415	0.93507	0.89762	1.66165
1.22916	1.57059	3.51237	1.10398	1.09573	1.74492
1.14406	1.66224	1.45345	0.82758	1.00404	1.84212
0.9037	1.45719	1.28864	1.01274	1.24708	1.78744
0.70968	1.18608	0.97373	0.80312	0.93422	2.869
0.82656	1.59218	1.39697	1.05884	1.24357	1.22092
1.0416	1.35764	0.98814	0.90163	0.91284	1.25663
1.22676	1.48928	0.75335	1.02911	1.07314	1.83301
0.62249	1.44465	0.92559	1.42749	1.09638	1.2903
0.86148	1.7693	0.95328	0.93961	1.21901	2.68535
0.86928	2.12542	1.30731	1.43851	1.08316	1.51647
1.02703	0.56514	1.15914	1.03508	0.68541	1.71954
0.82669	1.34704	1.59261	1.04147	1.00264	0.70652
1.12899	1.76486	1.21918	0.76588	1.09956	1.67215
1.07446	1.80427	1.05607	0.784	0.71367	1.38113
0.85107	1.75393	1.02852	1.15141	1.23755	1.65388
1.02091	1.33137	1.18424	0.9558	1.0091	1.38956
1.15269	1.66435	1.2263	1.04014	1.02213	1.53552
1.39326	1.40345	0.88432	1.20383	1.05288	1.99047
0.92496	1.34674	0.9239	1.10689	0.84139	0.97878
0.89458	1.48255	1.11087	0.97204	1.33968	1.78736
0.80978	1.61494	0.93452	1.03724	0.96922	2.19972
0.76309	1.27754	0.9574	1.22035	1.34828	1.48706
0.71304	1.43669	1.17542	1.07004	1.01373	1.58097
1.32305	1.42324	0.87752	1.08463	1.39284	2.24736
1.26209	1.44054	1.03974	1.0152	1.28706	1.86191
0.93189	1.40941	1.16205	0.86015	0.78234	2.09889
0.98513	1.77042	1.21922	1.03413	1.11701	0.36041
0.8286	1.71408	0.96608	0.78991	1.22178	1.0113
0.83895	0.53354	1.23319	1.11043	0.96808	1.35165
1.18023	2.76015	1.27161	1.18791	1.10075	1.27315
1.41458	1.25225	1.35522	1.09494	0.98089	1.08742
1.21263	1.40079	0.97915	1.25062	1.00742	1.43705
1.05653	1.57106	0.95396	0.90636	0.77054	1.61923
0.73837	1.50408	1.13191	0.93869	1.19804	1.29428
1.33937	1.38527	1.42116	1.12598	0.92895	1.07657
1.85296	1.24629	1.05744	1.01444	1.10812	2.03733
0.82837	1.38155	1.15841	1.06891	4.82546	0.56962
1.04381	1.51354	0.82711	1.23944	1.19491	1.7472
0.85788	1.15458	0.87054	1.21687	1.26961	1.52768
0.79799	1.46339	1.32716	1.57939	0.9746	1.68019
0.91041	1.4982	4.13777	0.82944	1.12598	1.24356
1.02287	1.78764	1.04725	1.13457	1.30949	1.95822
0.7856	1.48704	0.74057	0.92807	1.35131	1.35029
1.0107	1.46175	1.27516	0.90497	1.5878	0.74798
0.73137	1.6094	1.15548	1.34055	1.05652	3.0668
1.00583	1.15264	3.15252	1.1533	1.16045	1.60017
0.22693	1.00137	1.42523	1.35313	1.19586	1.07443
1.37757	1.63717	1.2107	0.99453	1.01216	2.12387
0.66273	1.63116	0.74513	0.8377	1.67496	1.3161
0.73887	1.22162	0.4744	1.07513	1.19632	1.36093
0.88951	1.63564	0.95171	0.87321	1.07154	1.69027
1.04615	1.40096	1.29722	1.18455	0.96529	1.15905
0.87893	1.51012	1.28108	1.02419	1.41112	1.22985
2.04894	1.38921	0.90016	1.19871	0.7995	2.29766
1.06824	1.36785	0.18419	0.93723	0.97438	1.96244
0.7866	1.39738	1.43121	0.7705	1.05336	2.2681
0.93406	1.45229	5.87684	0.86077	1.10258	1.78692
0.80935	1.83472	0.87498	1.03903	1.09203	1.77179
1.84875	1.66211	1.38073	0.86684	0.96667	2.10603
1.08611	1.42925	1.12505	1.08364	1.3732	2.01383
1.23237	1.19022	1.02557	1.07783	0.84845	1.07603
0.73495	0.92812	1.16549	1.10099	0.97754	1.41129
1.01532	1.52236	0.91403	1.30992	1.31068	1.2184
1.10599	1.19761	1.00784	1.01678	1.06386	1.07674
0.73574	1.41202	1.07871	0.92419	0.99505	1.39815
1.03245	2.39967	0.90913	1.26437	1.19853	1.58939
1.48209	1.33155	1.37517	0.9524	1.50466	2.17043
1.18516	1.81086	1.06057	1.32734	1.25577	2.23202
1.16922	1.27873	1.18034	0.94146	0.69618	1.37206
0.94474	2.06127	0.81463	1.0354	1.13748	1.84385
1.00867	1.15243	0.95893	1.01684	1.09304	1.37011
1.18509	1.14116	1.41245	1.25303	1.01955	1.54368
1.45012	1.31225	0.8668	1.34077	0.40063	2.73156
0.83364	1.95944	1.20089	1.11681	1.04171	1.9324
2.32108	1.27907	1.15146	1.05484	1.05561	1.36888
0.79941	1.38187	0.75074	0.93122	1.05908	2.09796
0.72956	1.8471	1.11583	0.90889	1.31969	1.58595
1.1108	1.08648	1.14309	1.65803	0.97407	1.65181
1.55446	1.5599	0.33541	1.45456	1.29464	2.08177
1.1727	0.70386	1.18183	0.97205	1.12191	2.80645
1.3279	1.51782	0.80817	0.92567	0.92318	1.80548
1.24181	1.91816	0.87132	1.13162	2.02934	1.11373
1.0286	1.53322	1.76298	1.03983	1.06759	1.35642
1.19084	1.17526	1.07491	1.14379	0.93884	1.50823
0.94118	1.49165	1.42179	0.98866	1.08374	4.3823
1.20581	1.32681	1.05406	0.86273	1.14248	1.88569
1.0885	0.87594	0.9573	1.3376	1.23884	1.57367
1.16412	1.38284	0.15061	0.88522	1.44152	2.21946
1.08057	1.38394	0.99493	1.06771	1.09589	1.67979
0.71752	1.55332	1.09671	1.02425	0.95193	2.16394
1.26794	1.61193	1.51888	1.34693	1.21872	2.03655
0.88405	1.54098	0.93636	1.34727	1.17011	1.86819
0.79883	1.26676	4.35282	1.0308	1.17593	2.0309
1.00014	1.41981	0.631	0.33954	0.85544	1.71726
1.04608	1.49891	1.10793	1.05903	1.0411	2.12507
1.49983	1.56897	0.97252	1.25053	1.44062	1.21343
0.88988	1.40671	1.0431	0.93182	1.29428	1.20478
0.89858	1.90222	1.04418	0.92484	1.1381	1.75776
0.83874	1.41304	1.43342	1.18323	0.99349	1.96011
0.78341	1.86324	1.03784	0.99365	0.89469	1.68149
0.81176	1.70629	0.8746	1.13344	0.27292	1.7486
1.12165	1.43418	0.43741	1.02191	0.66299	2.02012
1.07776	0.79287	1.14988	1.23177	0.5979	2.28305
0.9869	1.67397	0.78386	1.13353	1.09153	1.79292
1.0977	1.26212	1.54491	0.89306	1.09245	1.47097
0.91065	1.93503	1.11723	1.03686	1.40997	1.12976
0.80816	1.27804	0.46281	1.03911	1.55309	1.18349
0.7861	1.19651	0.89365	1.13909	1.57475	0.86807
1.18617	1.3381	1.22657	0.93118	1.00668	1.1325
1.17131	1.44775	1.12965	0.86821	1.23931	1.50332
0.71705	1.49929	1.06141	1.02684	1.02689	2.37058
1.41914	1.28066	5.32337	1.13131	1.09711	1.39259
0.89393	1.41606	1.15901	0.82829	1.0739	2.50942
1.23645	1.93429	0.87605	1.37731	1.20091	1.46628
0.80323	1.36527	1.14364	0.99595	1.00876	1.35872
1.09169	1.98862	3.12884	0.97875	0.96029	1.37528
1.32582	1.50202	1.08712	1.09434	0.50537	1.91552
0.82825	1.49114	0.86292	1.15217	1.55432	1.14537
1.02631	1.47932	0.8019	1.23906	1.01407	2.86166
0.54845	1.02069	0.97434	1.13176	1.84276	1.73421
1.08139	2.01374	1.14981	0.96434	0.95113	1.4807
0.85678	1.91244	0.85406	0.86968	0.94052	2.74482
0.68366	1.61115	0.80185	1.06684	0.90142	1.28901
0.66099	1.4838	1.39034	0.9612	0.91073	0.66347
1.25428	1.09042	3.53535	0.93713	1.00651	1.79242
0.81056	1.5502	0.77995	0.97162	1.25526	1.37255
1.35453	1.1819	0.9242	0.99023	1.15785	1.50787
1.43108	1.2024	0.88576	0.96686	0.5811	1.92468
0.79976	1.08073	0.99346	1.27662	0.54155	2.11867
1.11174	1.26872	1.59092	0.96003	0.62502	0.52681
0.94761	2.76937	1.4978	1.28714	1.08456	1.34983
1.73193	1.70281	0.93914	1.04019	1.18372	2.16213
0.54099	1.6313	0.95899	1.26875	1.25122	1.37461
0.93727	1.10654	1.03289	1.26999	1.43202	1.63306
1.03422	1.58519	1.43684	0.95857	1.27094	1.69428
1.17354	1.90356	1.24706	0.90411	1.10561	2.33483
0.6642	1.19737	1.15325	1.09896	4.33812	1.57865
1.05871	1.38666	1.10354	1.00154	1.88884	2.19684
1.22768	1.48959	2.56	0.76929	1.27914	2.09901
2.2164	1.10628	1.11858	1.10125	1.33001	2.42109
0.6233	0.80398	2.00007	1.07988	1.00946	1.41388
0.90138	1.43168	1.19797	0.79243	4.62463	1.82276
1.5259	1.34232	1.2178	1.17287	1.06141	0.95794
0.91906	1.49958	1.15734	1.5645	0.95076	0.6549
0.92841	1.76659	0.85036	0.80501	1.26662	1.46061
1.04309	1.66645	0.8323	1.0152	4.56068	1.53712
1.01461	2.0775	0.88802	0.9146	0.94314	1.46027
2.43005	1.74821	1.76843	1.29755	1.23489	1.12565
1.17078	1.61639	1.10406	0.75773	1.38818	2.91162
1.3525	1.34076	5.79312	1.36003	0.57783	1.44613
1.45805	1.46195	1.0844	1.4812	1.32326	1.6729
1.02093	1.29469	1.4026	2.69751	0.89402	2.46693
0.9415	1.69437	1.42413	1.26817	1.11983	2.7446
0.87506	1.36846	0.97266	0.97312	1.03719	1.11447
0.94297	1.87638	0.98888	0.94887	0.97069	1.5318
0.9919	1.84049	2.5276	1.10634	0.85661	2.42961
1.33249	1.31204	0.88258	1.10352	0.85158	1.20363
1.11702	1.36016	1.07677	1.09798	2.42314	1.06798
0.97313	1.32146	1.55549	0.98446	1.15856	1.91709
1.02214	1.32859	1.09639	0.78515	1.19114	1.37275
0.89104	1.40462	1.4113	0.94244	0.96254	1.01666
0.82507	1.43451	0.97686	1.03046	1.33065	2.56455
0.70966	1.11945	1.08332	1.04661	0.9138	2.0419
1.16802	1.31216	3.64775	0.86	1.1139	1.518
0.93995	1.34698	1.28587	1.31774	0.82363	1.49121
0.79843	1.1656	0.86406	1.05665	1.03598	1.11803
0.89596	1.71855	2.01811	1.01554	1.28959	1.18316
0.99828	1.81861	1.24164	0.89609	1.04564	2.27673
1.22737	1.55227	0.95003	1.46863	0.91413	1.63413
1.28209	1.77737	1.35067	0.88647	1.31987	1.51648
0.70054	1.43923	1.17536	0.9783	1.0419	2.30027
0.94454	1.26691	0.86508	0.94212	1.00048	2.0603
1.02113	1.70565	0.9028	0.94696	1.30264	1.51682
1.06782	1.62726	1.18223	1.02518	1.21507	1.39984
1.2643	1.65019	0.8637	1.11091	1.36353	2.20993
1.04513	1.61721	1.28218	0.82996	0.99842	2.63862
1.15342	1.47836	1.09243	0.9635	1.17053	1.28921
0.77049	1.32306	1.63816	1.07892	1.29172	0.97875
1.34294	1.53047	1.29824	1.31788	1.229	1.5616
0.88567	0.77885	1.8596	0.93964	0.86383	1.64313
0.73715	1.87584	1.55301	1.1395	0.88988	2.00067
0.9859	1.4006	0.95431	1.12112	1.02707	1.60296
1.05701	1.24876	0.78933	1.03547	0.92063	1.65522
0.81428	1.34268	0.85397	1.54211	1.65935	1.85231
0.8306	1.49716	0.88325	1.22664	1.09128	1.49044
1.16936	1.5571	0.96627	1.11593	1.00895	1.93111
1.25661	1.24483	0.84632	1.39488	1.03371	3.91838
0.72142	1.33276	0.95813	1.17475	1.74196	2.19826
1.1766	1.45141	1.40168	1.10609	1.09644	2.08402
1.20867	1.08693	1.20312	0.90646	0.80339	1.27279
0.87999	1.5305	0.39436	1.09589	0.97276	2.30678
0.75178	1.21068	1.11213	0.95989	0.91864	2.34748
1.07863	1.21169	1.32047	1.01382	1.32233	1.5902
0.78731	2.02144	1.05712	1.11014	0.97399	1.05259
1.10152	2.39147	0.98601	1.97339	1.26233	1.62788
1.26815	1.88278	1.02551	0.98921	0.80681	1.61862
0.99845	1.93676	1.15554	0.81141	1.60602	1.96108
1.16225	1.38483	1.04283	0.7769	0.80162	1.92155
0.86444	1.65987	4.6186	1.33186	1.03847	1.9468
0.72621	1.37655	0.90325	1.04679	1.18086	1.59607
0.90206	1.33359	0.84303	0.99872	0.89575	1.24774
1.01332	1.23854	0.97686	1.10239	1.02184	1.26609
0.84636	1.2983	1.02529	0.91404	0.95818	1.64824
0.98733	1.2321	0.88423	0.93771	1.26403	1.77316
0.71781	1.20043	1.34654	1.12312	1.51592	1.93996
1.49506	1.5988	0.32906	0.85491	1.18839	1.70995
0.67727	1.42023	0.66687	1.15049	1.32553	1.04096
0.54365	1.65669	1.14803	1.13919	1.168	1.50182
0.83383	1.33421	1.20985	0.87458	0.81607	1.28255
1.61264	1.53386	0.68518	0.82668	1.2346	1.84059
0.82908	1.13848	1.31732	0.88758	1.10926	2.51801
0.66147	1.41593	1.07528	1.16727	1.06483	1.07252
1.22436	1.70938	1.0346	0.93634	0.92174	1.27219
0.99799	2.83481	1.11402	0.99092	1.32563	1.35532
1.29901	1.30289	1.50332	1.21539	1.0928	0.65856
0.87672	1.25173	1.81339	1.06607	0.77514	1.57734
1.24233	1.22511	0.79482	1.02269	1.03769	1.47925
0.98152	1.2158	1.05509	0.85965	1.11563	1.49898
0.97842	1.54717	1.37771	0.8971	0.78081	1.82246
0.69649	1.96125	1.14101	0.84686	1.03506	2.22875
1.2536	1.6733	1.11577	0.97435	0.57951	1.85013
0.77511	1.44484	1.26906	1.13759	1.09809	1.74721
0.96704	1.5607	5.23151	1.10948	1.06603	0.76776
0.63448	1.35951	1.27592	1.18727	1.095	1.41249
2.06528	1.37162	1.80879	1.02352	1.04389	1.10985
0.9039	1.57237	1.19885	1.02232	1.14581	2.24361
1.81839	1.43532	0.88571	1.4298	1.22615	1.74502
0.61047	1.37012	0.81485	1.2427	1.02796	1.98241
0.69928	1.31503	1.04413	0.98554	0.8679	1.15607
0.78805	1.51496	0.20282	0.9618	1.04225	1.70793
1.04661	1.42074	1.40764	1.14802	0.85878	1.4942
1.72313	1.37156	0.94024	1.36656	1.20174	1.48598
1.14174	1.47611	0.96473	2.98747	1.42427	2.72267
1.16172	1.57172	2.41692	0.85534	0.88222	1.15261
0.80278	1.26841	1.5178	1.37538	1.29486	2.94121
1.19052	1.46356	1.20375	0.76591	0.96786	1.61205
0.87554	1.45296	0.84212	0.9804	1.15783	1.81353
1.0032	1.09201	1.41221	0.80152	1.0243	2.37059
1.10896	1.30414	1.62273	1.16381	1.79258	1.4101
0.96895	1.82113	1.12057	1.06786	1.81896	1.78838
1.19133	1.59714	0.80743	1.01477	1.13428	1.69111
1.08512	0.24796	0.99051	1.30012	0.87441	1.18745
1.20973	1.71583	0.97893	0.80499	0.89201	1.14887
0.80196	1.29039	0.60116	0.95048	0.89654	1.65218
1.44317	1.47823	0.75684	1.23058	0.75479	1.42211
1.07144	1.59094	0.98759	1.31396	1.13606	2.13252
0.75227	1.83498	1.59779	1.13391	1.04157	3.18795
1.16895	1.95983	2.06491	0.98318	1.40817	2.11658
0.81631	1.4419	0.98023	0.9516	0.67269	1.82473
1.03814	1.31623	1.21007	1.14088	0.58694	2.45187
0.59037	1.29689	1.98074	1.22599	0.80551	1.33754
1.52326	1.24027	1.13272	0.77365	1.05187	1.22151
0.75605	1.32552	1.2062	1.01753	1.22125	1.4267
2.15207	1.19676	1.10695	0.94228	1.0577	2.33718
1.50607	1.50676	1.18407	1.074	1.65626	1.30996
0.73824	0.45196	1.45717	1.00372	0.75505	0.92404
1.16258	1.27239	2.65886	1.55385	1.11384	1.94937
1.08576	1.33619	1.07131	1.05402	0.8958	0.7599
0.64328	3.84208	4.35039	1.29163	0.66279	1.73219
1.1478	1.51466	1.35481	1.02274	0.72372	0.97935
1.07302	1.56647	1.08738	1.04858	1.14806	1.51482
0.63533	2.13978	0.72055	1.18651	1.32231	2.22279
1.08836	1.59987	1.70886	1.15201	1.31859	2.55857
1.25422	1.49448	1.30185	0.89239	1.44208	1.06008
1.07719	1.42902	1.17242	0.82043	1.46663	1.67849
1.6341	1.1959	1.32326	1.02342	0.95961	2.32717
1.2065	1.51749	1.25983	0.90752	0.9874	1.51671
1.15442	1.74932	1.04501	0.82645	1.15894	2.75259
1.18744	1.35403	1.4686	1.09093	1.42818	1.8435
1.22864	1.26067	1.00522	1.10784	1.34292	2.74672
1.62158	1.40913	1.40852	1.56715	1.55148	0.7278
1.43769	1.36709	1.57491	2.40613	1.33828	1.89324
1.14157	1.67855	1.43367	1.04072	1.36997	1.85475
1.37387	1.86926	1.20173	0.98584	0.99985	1.68123
1.00149	1.52328	1.17721	1.02044	3.45876	2.10102
0.83299	1.62051	1.23994	1.38525	1.1153	1.84329
1.43218	1.20119	0.92321	0.90896	1.15945	1.60179
1.07792	1.34067	1.12127	1.02803	0.83049	1.72859
1.55144	0.29336	1.04626	2.41408	0.57256	2.29319
1.29428	1.10248	0.84544	0.97562	1.49038	1.57305
0.86329	1.6013	0.84612	0.88198	1.09902	1.06014
0.97829	2.04831	0.80936	1.17115	1.17161	1.71961
0.61519	1.36992	0.81706	0.98408	1.00344	1.21892
0.85513	1.46956	0.85881	1.05085	1.43867	3.13151
0.89389	1.15372	1.37338	0.96448	1.09342	1.63399
0.7892	1.29301	1.11651	1.15484	1.24318	1.8471
0.97251	1.30565	1.0674	1.26481	1.21107	0.94626
0.91563	1.3543	0.91488	0.92371	1.06062	3.59092
0.83506	0.52396	1.17528	1.04188	2.23303	1.68752
0.86678	0.9092	1.03379	1.10206	2.05685	2.93207
0.89652	1.30552	1.05706	1.02097	1.6094	0.97251
1.73378	1.63597	1.01951	1.04755	0.81693	2.82629
0.86709	1.23864	0.9015	1.229	1.39125	1.91279
0.7422	1.43166	0.70757	1.06744	1.28345	1.60046
1.00373	1.5697	1.32042	1.05593	0.96735	0.84478
0.77434	1.1361	1.02772	0.87793	1.50015	3.58286
1.50613	1.85645	0.98876	1.23423	1.24912	4.03147
0.97974	1.99945	1.14125	0.89378	1.09522	1.40551
1.18534	1.3725	1.375	0.89913	0.91447	1.93135
0.83998	1.64039	3.22869	1.26095	1.03437	1.03788
1.12422	1.51328	0.59804	0.9685	0.82129	1.40627
0.64763	1.43653	0.84775	0.90484	1.0049	1.0049
0.73619	1.08506	1.21188	0.95035	1.07233	1.19877
1.07499	1.3854	0.97577	0.89062	0.90771	1.66528
0.71714	1.34257	1.25841	0.84958	1.48422	1.67961
0.86093	0.66857	1.04908	0.81867	1.20899	1.82144
0.76413	1.63943	1.01551	1.10034	1.26959	1.27406
0.99543	1.70433	1.67884	0.9476	1.11839	3.24993
1.32323	1.42178	0.8359	0.96885	1.38764	1.40208
0.67598	1.51958	1.13662	0.9589	0.77465	3.25958
1.26258	1.46103	0.91867	0.98955	1.13173	0.79107
1.53195	1.20193	0.89146	1.13209	1.16756	1.29074
1.00016	1.49573	5.07532	1.47419	0.90641	1.7005
1.1933	2.07355	1.03974	1.15435	1.48189	2.23748
0.65874	1.49692	1.13305	1.04838	1.2594	2.52103
1.43755	1.48578	0.98772	1.46114	1.18977	0.72776
1.13305	1.4571	1.37707	0.91701	1.34831	1.67805
0.7837	1.57497	1.31242	1.00882	1.41584	1.57764
1.16238	1.57432	0.88194	0.79126	1.53664	2.07831
1.25833	0.28964	1.1464	1.13664	0.99089	4.34344
0.95106	1.26199	0.85732	1.06106	1.07606	2.52911
0.95167	1.71552	0.92355	1.14438	1.31372	1.62638
0.89733	1.2785	1.06996	1.14019	1.05957	2.81126
1.09024	1.64364	0.92759	1.03017	1.1032	1.39097
0.77222	1.4389	1.32179	1.06287	1.16951	1.27222
1.03326	1.69719	1.08568	0.83227	2.03039	1.80781
1.36038	1.22588	0.64229	1.16169	1.11531	3.0647
0.94449	0.9629	1.65424	0.76318	0.97663	2.1491
0.85855	2.02772	1.2529	1.09537	1.21348	1.48926
1.38942	1.29754	0.87704	0.86101	0.61554	2.38489
0.98457	1.73758	0.84344	1.01171	0.7842	1.1603
0.81539	1.45182	1.08966	0.92694	1.14861	1.19533
0.78607	2.61668	0.75076	1.09393	1.41117	0.40925
1.30919	1.28754	1.51327	0.97572	0.85091	1.34615
5.44414	0.43086	2.49893	0.50573	1.24388	1.29865
1.05626	1.5698	0.95563	0.96966	1.35807	2.09297
1.01143	1.47195	3.87332	1.16168	4.09591	2.45184
1.17805	1.4626	1.13888	0.9654	0.28544	3.48057
1.26035	1.46195	1.02778	1.06174	1.35107	0.21918
0.89685	1.27957	1.1548	1.20363	1.30822	1.78702
1.44195	1.25791	1.09656	0.84543	1.10703	2.15783
1.3108	1.09286	1.18017	1.36395	0.90394	1.40568
1.02706	1.63066	1.19227	1.09797	1.15108	1.18487
1.51196	1.44429	1.08359	1.00892	1.42003	1.6521
1.616	1.59888	0.93972	0.91616	1.24485	1.93545
1.23329	1.6014	1.2114	1.51403	0.91639	1.92684
0.89491	1.51583	1.04193	1.17007	0.98677	1.87608
1.27233	1.57513	2.05413	0.93121	0.91502	1.3577
0.96972	1.58315	1.25021	1.07343	1.13321	2.01117
1.48747	1.62231	1.01256	0.9546	1.33663	2.23778
1.00899	1.51015	0.85031	1.03915	0.81454	3.39032
1.27724	1.3088	2.29002	0.94606	0.99814	1.38288
1.71473	1.42416	1.36702	0.95303	1.14581	2.30216
0.89551	1.88544	1.32196	0.9059	0.8163	1.65808
0.93669	1.90064	0.98245	0.65937	0.81157	1.40181
1.15904	1.45856	1.35396	0.93366	1.39786	2.09737
0.8996	1.50388	1.11696	0.97067	0.90302	1.25739
1.10378	1.68027	1.1206	0.77401	0.92	1.90732
1.13363	0.7065	1.17496	1.30343	1.12506	2.66186
1.55156	1.24584	1.54051	0.85169	1.25564	1.10869
1.19226	1.51611	0.90899	1.16889	1.23325	1.46251
1.27939	1.26332	0.96201	1.03154	1.08831	1.67206
1.21317	1.17278	0.80377	1.06957	0.20215	1.48468
0.69262	1.65931	1.26171	0.85813	0.94855	1.83431
0.97209	1.37072	1.04117	0.50135	1.36333	1.01591
1.00452	1.63949	0.84449	0.76678	1.15627	0.3403
0.64416	1.53096	1.25565	1.00757	1.18745	1.45562
1.24366	1.83601	1.04678	1.00896	0.61079	2.59571
0.67778	1.39098	0.94951	0.98748	1.09955	1.51904
0.88452	1.60197	1.28131	1.33272	1.17053	0.69034
0.90771	1.87318	0.99117	1.06827	0.88204	2.00773
0.78675	1.24936	0.80284	0.94929	1.14417	2.08912
1.00226	1.76631	1.58166	0.85654	0.95011	0.32068
0.74188	1.75138	0.95605	1.30454	0.97643	1.11084
0.94382	0.9953	0.92445	1.37971	1.28108	2.839
0.70335	1.32336	0.92688	0.86017	1.03557	2.51493
1.074	1.49642	0.78071	0.97615	1.24774	1.25851
1.02347	1.31927	0.91572	0.97558	1.18651	1.63379
1.06961	1.83134	1.01227	1.4517	1.07561	1.83885
0.77204	1.31231	1.22571	0.97737	0.86077	2.91321
1.15205	1.97209	1.45987	0.73367	1.20558	1.24802
0.95089	1.59306	0.71457	1.16247	0.87836	1.19853
1.17817	1.60848	1.25684	0.93539	1.15954	1.17633
1.43386	1.59676	0.87905	1.08627	0.97815	1.28071
1.26904	0.77896	3.86848	1.00104	0.83773	1.56776
1.07475	1.1007	1.24481	1.07032	0.37296	1.7275
0.81712	1.24584	1.07469	1.02023	0.97881	1.95455
0.85257	1.54523	1.05119	0.92172	1.00414	4.6115
1.36656	1.04468	1.20633	1.06447	1.06421	2.02282
0.93847	1.7243	1.06979	0.98876	1.29888	2.06372
0.69092	1.37857	1.38306	0.92401	1.00002	1.87851
1.97471	1.37107	1.64651	1.17376	1.32626	1.86627
0.7192	1.54039	1.42564	0.95784	0.24267	1.97129
1.02519	1.33968	0.80442	1.0299	1.01599	1.50398
1.08743	2.17925	1.14366	0.81513	0.42681	2.08838
0.80711	1.61673	1.46531	1.37332	0.65379	2.34321
0.72416	1.81975	1.8474	1.02698	1.01763	1.38948
1.25741	1.55404	1.15063	1.21248	0.95871	1.17129
1.23587	1.74477	1.28986	1.37049	1.06459	1.68024
0.7911	1.22653	1.22002	1.08166	1.18977	1.09784
1.85044	1.72053	0.9628	1.28099	1.00516	5.50942
0.97939	1.25335	0.89379	0.90072	1.37277	1.63232
0.7487	1.47733	0.95606	0.81635	0.85634	1.82678
0.9573	1.95404	0.97464	1.07612	1.08426	1.19674
0.74751	1.83039	0.85503	1.01984	1.22078	1.00601
0.86034	1.87437	1.23092	0.88687	1.03276	1.89977
0.92484	1.34289	1.44341	1.11129	0.9533	1.69233
0.88838	1.1736	0.80826	0.79482	1.13375	1.81952
5.12897	1.98513	1.00264	0.97763	1.37953	1.74965
0.83203	1.54725	1.02064	1.05853	1.34155	2.32316
1.35298	1.9589	1.20535	0.95258	0.76541	1.41847
1.01052	1.5573	0.88644	1.11594	1.10469	0.83184
1.06245	1.19206	1.04446	1.26428	1.02707	2.7573
1.15587	1.25637	1.04884	1.09973	1.67577	1.54639
0.96629	1.51606	1.25091	0.91561	1.04387	1.41685
0.71673	1.12076	1.13166	1.21093	1.22988	1.96806
0.78353	1.27146	1.00426	1.22555	0.90582	2.62359
1.00472	1.44959	0.86766	1.30364	1.16035	2.00704
1.52451	1.9994	1.00279	0.92925	1.06761	1.41216
0.71436	1.41228	1.26727	1.09179	0.84812	2.54782
1.67636	1.32835	5.1245	1.22615	0.98852	1.92808
1.05597	1.79755	1.49365	1.26221	1.05917	1.31306
0.95976	1.57672	1.07863	1.07036	1.53527	1.57799
0.80819	0.47303	0.9096	4.64165	1.80499	3.00707
1.60089	1.46726	1.0007	1.12344	1.41643	2.35778
0.9089	1.08126	1.18134	0.65954	1.09867	2.85055
0.80986	2.05029	1.13432	0.98123	1.11586	1.42959
0.70489	1.62379	0.84466	1.7392	1.19624	1.61679
1.20802	1.50505	1.1141	0.9405	2.81966	0.66238
1.13146	1.56973	0.92595	1.12293	0.95858	2.77309
1.11296	0.94979	1.35405	0.82597	1.17526	1.70333
1.42407	1.31345	1.24795	1.27892	0.7955	1.24787
0.8562	1.21752	1.04368	3.59725	0.89619	2.14956
1.17909	1.65017	0.83449	1.71146	0.93456	1.44618
0.94123	1.19672	0.8606	1.43037	1.29482	1.96242
1.45773	1.50031	1.39773	1.63197	1.07253	0.83492
0.86978	1.53148	1.22178	1.18675	1.03466	1.44549
1.17895	0.31702	1.31731	0.97639	1.33642	1.92835
1.09915	1.25231	1.08141	1.37553	0.53943	1.34884
1.13491	1.87183	1.4675	1.56071	0.89933	1.90385
0.93105	1.96562	1.96509	0.85255	0.37837	1.78358
0.80356	1.69195	1.31987	1.12667	1.07445	0.91164
1.53109	0.54098	1.5252	0.90968	1.26539	1.76712
1.03163	1.5821	1.32837	1.04779	0.8999	2.18841
1.13869	1.3744	0.87651	1.03924	1.36912	1.40235
1.17244	1.54738	0.99009	1.15	0.95496	0.97711
0.9273	1.6795	3.76371	0.86988	0.96605	1.96364
1.05299	1.49437	1.10027	0.46016	1.07252	0.99634
0.84822	1.50209	0.74211	0.62782	0.92763	1.73148
0.87989	0.95197	1.01223	1.16767	1.30437	1.44097
1.02872	2.03498	1.4589	0.94445	1.04017	1.33393
0.64303	1.895	1.13933	1.02093	1.29713	1.05634
1.00322	1.30211	1.83539	0.97506	1.02782	2.06901
1.09276	1.67013	1.32595	1.1289	0.84984	2.21852
0.92939	0.71081	1.5573	0.79118	1.16952	1.60348
0.83178	1.84246	0.89932	1.03643	0.76946	1.29973
0.87851	1.38741	0.90367	1.33653	0.92543	1.43878
0.61376	1.51659	1.13092	0.78123	0.45306	2.80905
0.77777	1.58917	1.29471	0.92908	0.93915	0.97758
0.87321	1.59215	1.54385	0.90489	1.07996	1.30803
0.94766	1.33004	4.0322	1.19189	1.01481	2.53213
2.00248	1.60602	2.63845	1.10147	1.21967	1.36788
1.09656	1.46446	0.75431	1.05373	1.03738	1.71837
1.26369	1.28025	1.1161	0.8732	0.94927	0.57351
0.78437	1.70897	1.25543	0.7819	0.49796	1.48603
0.97974	1.47491	0.92768	1.16674	0.83443	3.63105
1.31682	0.79279	0.88988	0.48197	0.92929	2.18213
1.06605	1.4863	0.97432	0.96284	1.69812	1.19815
1.02693	1.79683	1.36179	1.0924	1.02553	0.52993
0.82754	1.74762	0.99406	0.99385	0.75447	1.07098
1.5406	1.49462	1.34958	1.13346	1.00623	2.04647
1.40892	1.67716	0.73873	0.86498	0.98272	1.51531
0.99842	1.59449	0.968	0.9902	1.37257	1.4731
0.61244	1.53738	0.96551	1.03652	1.10825	2.55731
1.12371	1.68833	0.9124	1.32909	0.88639	1.87389
0.89775	0.21424	1.14266	1.01936	1.01488	1.74457
1.07733	1.45932	1.5437	1.22668	1.17652	1.14373
0.78277	1.30389	1.19652	0.97659	1.18077	2.80963
0.8044	1.61459	1.07473	0.64069	0.74325	1.73947
0.9029	1.19466	0.77383	1.24557	1.05578	1.42001
0.92828	1.95489	0.93234	1.0468	1.27822	1.69846
2.51873	1.48573	1.0905	0.98012	0.97788	1.41717
0.9661	1.34715	3.15245	0.82791	1.14355	2.10814
0.49496	1.39977	0.99138	1.04084	0.85714	1.37326
1.05741	1.19841	1.17136	1.05433	0.93743	2.16948
2.15595	1.16894	0.81573	1.00148	0.95374	1.28087
0.93484	1.30793	1.03685	1.04894	1.37776	2.79231
1.57268	1.52725	0.8213	1.11857	0.31661	1.64
1.26628	1.51693	0.84109	0.87594	1.04674	1.59894
0.96614	1.17637	1.02989	0.99626	0.68107	1.62704
0.93971	1.34095	1.06998	1.14935	0.96177	0.76647
1.19647	1.41894	1.03451	0.90934	0.31765	1.85086
0.73178	1.59715	1.02929	1.18603	1.20703	1.20545
1.20336	1.81555	1.18282	1.0941	0.90435	1.2167
0.98288	1.78354	1.55163	5.07325	0.3084	1.83089
0.61259	1.85614	1.02926	1.13755	1.40289	1.61226
1.05226	1.68831	1.09199	1.20449	1.36634	1.67977
0.81599	1.59833	1.27292	0.86007	1.17585	2.97791
0.81094	1.80036	1.02019	0.92914	0.99651	1.09091
1.00416	1.96485	0.99825	0.73939	1.15411	1.74593
1.048	4.48206	0.96749	0.993	0.75676	1.97193
1.04225	1.81409	1.66051	0.81445	0.83852	2.19598
0.69594	1.80581	1.32832	1.11501	0.96054	2.27206
0.93196	1.18249	0.99214	1.1066	0.96609	3.23175
1.80898	1.5126	1.05176	1.22483	0.80107	2.15781
1.39258	1.69511	1.09917	0.9328	0.97837	2.126
0.90346	1.57755	1.12632	1.17001	0.96685	1.67014
0.94785	1.44248	1.13165	1.01641	0.38022	1.02218
0.82404	1.43184	1.14302	0.83789	0.92182	1.40869
1.56859	1.46835	0.94382	1.21288	1.0903	1.64646
1.50663	1.43155	1.02977	1.19436	0.43567	1.79077
0.78923	1.35934	1.34923	1.41887	1.18538	2.67661
0.50959	0.24129	0.8927	0.98723	1.19956	1.47814
0.62659	1.27358	1.4813	1.05499	1.20886	2.93409
1.03971	1.57045	0.88803	1.13626	1.15796	1.76682
0.95805	1.62165	1.27778	0.97688	1.1373	1.98725
0.81101	1.73711	0.88144	1.2364	1.00418	1.06539
1.23326	1.83606	0.78033	0.99939	1.36269	1.21399
0.88835	1.45406	1.0217	0.70747	1.12454	1.32375
0.82999	1.75565	1.2149	1.55358	1.13075	1.22056
0.85567	1.22783	1.15102	1.12995	1.18773	1.51481
0.74196	2.99431	1.24913	0.83494	1.35136	1.47112
0.85687	1.53058	1.0129	1.26262	1.00823	1.45847
1.00512	1.65046	0.95684	1.34681	1.34576	1.29328
0.85509	1.36882	1.21336	1.00092	1.39063	2.29019
0.91621	1.55073	1.1459	0.9854	0.79925	1.07208
1.09797	1.67559	1.16761	0.9515	0.91723	2.61033
1.51446	1.98484	0.90906	1.12411	1.362	1.28132
1.00596	0.54999	1.36992	1.02251	0.61078	1.57764
1.06213	1.54247	1.08623	0.95544	1.06338	1.04716
1.52524	1.52336	0.97154	0.79022	1.41123	1.71823
0.94179	1.78614	1.53997	1.10296	1.1069	1.17273
0.83174	1.66396	0.99116	0.85464	0.9667	1.24532
1.15339	1.59497	1.0174	1.0008	0.99891	1.85768
0.70332	1.63833	1.18837	1.0942	1.08402	1.86721
0.76568	1.5617	0.70214	0.90472	0.96923	1.77208
0.71755	1.43524	1.16827	1.09524	1.01595	1.1217
0.98534	1.31806	1.24647	1.13699	1.12209	1.38888
0.93856	0.89787	1.31978	1.33317	0.89887	3.04535
0.85365	1.38599	1.36172	1.15108	1.12128	1.67858
0.92691	1.44457	1.15061	1.08285	1.04351	1.95936
0.79296	1.30776	0.99451	0.84819	0.9887	1.38995
1.65734	0.3336	0.32525	0.97115	1.11423	1.9146
0.68198	1.45928	1.15702	1.21181	2.69203	1.5066
0.81726	1.26647	0.9181	1.13258	0.94201	2.00543
0.83234	1.41965	1.17403	1.14765	0.87968	1.0818
1.12964	1.1321	1.05267	0.74241	0.89326	2.40423
1.33885	1.31474	0.977	1.04611	1.13877	1.3769
1.8298	1.65216	1.12573	1.36064	0.95807	3.00907
0.96012	1.45152	1.24264	0.9957	1.11635	2.99969
1.03296	1.42764	0.78574	5.21231	0.31953	1.8745
0.74168	1.23466	0.94236	0.9402	1.65175	1.72607
0.98079	1.60227	1.60584	0.25705	1.04788	1.72631
1.41344	0.78152	1.44646	0.82236	1.20708	2.52103
0.79355	2.05714	1.10873	1.22269	0.75971	1.64619
1.81307	1.53118	0.93866	0.77924	1.29984	2.15667
1.06117	2.05651	0.7109	0.86126	1.27434	1.29689
1.26069	1.30679	5.38891	0.92141	0.89436	2.59014
0.72955	1.46175	0.84089	0.92619	1.03069	1.13325
0.62083	1.48887	0.97992	0.96819	1.07241	1.44881
1.04262	4.51231	1.13639	1.2007	1.02926	1.52361
0.99537	1.3674	1.13052	1.07185	0.95844	1.74649
0.66391	1.43262	0.82236	0.87511	0.88013	1.58216
0.84858	1.48118	1.18395	1.06177	1.03419	1.04007
0.63726	1.36358	1.4192	0.89836	1.06494	2.71343
0.88129	1.11836	1.00574	0.9716	0.99089	2.47331
0.93176	1.43784	1.17495	1.16758	0.83478	1.14391
1.49235	1.8792	1.00931	1.36738	0.80982	2.34473
1.10622	1.66653	1.66853	0.7391	0.68475	3.49319
0.91211	1.4367	1.0689	0.91769	1.17964	0.76252
0.89782	0.51397	1.11277	0.91703	1.66199	1.40841
0.91558	1.43367	1.06577	1.02704	1.23859	1.24042
1.09141	1.56601	1.03103	1.01777	0.99703	2.92772
0.95704	1.29503	0.68266	1.09619	1.38624	2.12973
1.22317	1.52357	0.9521	1.01812	1.0411	1.16786
0.75773	1.56308	0.76087	1.05871	0.97722	1.68313
0.93399	1.43661	0.94655	1.11261	1.18785	1.91667
1.34332	1.3626	0.78439	1.12981	1.24557	2.17543
0.6755	1.47341	1.33268	0.94891	1.13127	2.84269
0.67838	1.97014	1.13108	0.72212	0.81576	0.59559
1.17812	1.51849	1.07302	1.15919	1.01075	1.55533
0.74868	1.34122	1.28739	0.86307	0.79257	1.51077
1.71092	1.47071	1.0316	1.02598	0.99063	1.37021
1.02235	2.61762	1.34737	3.23283	1.19377	2.16033
0.61249	1.11501	1.10294	1.43212	1.05107	1.12226
0.89798	1.7693	1.00423	0.91834	1.25316	2.78135
1.34039	1.47751	1.23742	0.9375	0.93455	1.77163
0.92198	0.96963	1.02178	1.06006	1.54108	1.9797
1.89732	1.66206	0.79822	1.03148	1.15019	1.93386
1.5242	1.58502	0.8982	0.96053	1.18422	2.09667
0.72138	1.78637	0.89697	1.27327	0.89888	2.2487
0.80626	1.73043	0.98257	1.11698	0.45946	0.94902
1.17764	1.34535	1.09034	1.02378	1.07053	1.29696
0.78606	3.13156	1.01105	1.09663	0.80082	2.07549
1.07186	1.62057	1.40972	0.78069	1.51921	2.83103
1.09507	2.38873	0.86203	1.08105	1.4181	1.44274
1.18284	1.21386	0.974	1.50701	1.10871	1.78156
1.26693	2.01303	1.54525	1.08847	1.02601	1.24999
1.19735	1.78218	1.17976	1.15286	1.12018	2.4284
1.10675	1.50676	0.96313	1.14665	1.22421	1.87978
1.31039	1.50061	0.7835	1.17332	1.25443	1.27422
0.97241	1.42433	1.13432	0.93792	1.34104	2.08937
0.96992	1.553	0.98419	1.06043	1.11595	1.22903
0.82475	1.07053	1.2002	0.99971	4.2857	1.52552
0.9675	1.44173	1.08154	1.16749	1.1396	1.48153
1.20154	2.15192	1.22252	0.98166	1.19995	2.95633
0.86652	2.05498	1.44382	1.04406	1.31959	1.66489
1.05941	1.28734	0.90055	1.1809	1.14018	1.84025
0.63097	1.71727	0.96221	0.83131	0.37982	0.85752
1.14151	1.42961	0.98283	1.05679	1.08197	2.22078
0.81252	1.73872	1.17154	1.14685	1.01668	1.679
1.30343	1.62242	1.08298	1.07126	1.12638	2.49824
0.9437	2.20111	1.10918	1.38516	0.75454	1.59501
0.94015	1.42109	0.89974	0.94562	0.75343	1.14027
1.30909	1.77672	0.74757	1.09547	1.48732	1.7385
1.21872	1.22298	0.95877	1.01751	1.07764	1.27111
1.88459	1.29143	1.18353	2.32232	0.73816	0.78266
0.88279	0.71455	0.72373	0.95656	1.17074	1.50186
0.69474	2.12931	1.33114	1.0593	1.17587	1.03496
1.0609	1.0852	1.1746	0.87691	0.91058	1.5952
1.05446	1.349	1.41397	0.96404	0.74917	1.16693
1.03043	1.40122	1.07193	0.65412	0.99284	1.2843
1.16728	1.43531	0.86133	0.78596	1.15385	1.37558
1.41716	1.41887	0.95365	1.3959	1.61706	2.17512
1.27359	1.42693	1.15028	1.13248	1.514	1.06771
0.93408	1.92705	0.85509	0.27322	1.32939	1.09224
1.36797	0.63389	1.22028	1.58543	1.11433	1.44704
1.11173	1.36485	1.08882	1.23646	1.27778	0.82025
0.6888	1.87253	1.21229	1.15494	0.79726	1.55589
0.97196	1.70103	0.81713	1.20363	0.71026	1.64881
0.70211	1.56359	1.05046	0.99537	1.01094	2.54226
0.90066	1.30085	0.93869	0.97633	1.02434	1.18273
0.93066	0.8554	1.22439	0.61967	1.21206	2.19265
0.92283	1.61097	1.13024	1.45035	0.94883	1.90313
1.74514	1.34745	1.02998	1.05432	1.52377	2.39373
0.86588	1.50261	1.37296	1.14457	1.06549	1.77382
0.6014	0.19276	0.93062	1.40068	1.22168	1.51089
0.87441	1.64223	0.39249	1.02721	1.1992	2.43448
1.18879	1.55371	1.47372	0.71022	0.85318	1.55753
1.25102	1.90456	1.01574	1.0953	1.07328	3.36531
0.81526	0.84934	1.24716	3.67465	1.09923	2.13678
1.26995	1.91049	0.92565	1.11037	1.15239	1.65646
1.18551	1.40905	1.22089	0.92196	0.69379	2.1474
0.94701	1.24545	1.14302	0.77351	0.78669	1.03199
1.68614	1.54102	0.90264	1.1022	1.15609	1.15111
0.90935	1.58873	1.16081	0.80442	1.13016	2.59671
1.11093	1.13859	0.7519	0.78952	1.14883	0.77873
0.85093	1.80198	1.43239	1.0112	0.96322	1.31213
1.29764	1.15339	1.1792	1.17106	1.34126	1.20594
1.14257	1.35911	0.79906	0.82041	1.91965	1.4268
0.87366	1.73941	1.16169	1.19865	1.01919	1.93288
1.073	1.80879	1.12448	1.05271	0.79939	1.13315
0.71425	1.63265	1.19121	0.94511	0.909	0.41661
1.05038	1.14056	1.44436	1.16131	1.06736	1.65427
0.96162	1.3978	1.16674	0.81561	1.29313	1.48061
1.26374	1.12291	1.30302	0.77735	1.06157	1.57437
0.83184	1.63013	1.26489	0.81924	1.29185	1.51548
0.82862	1.0701	0.97436	0.79162	0.34829	1.91285
0.93989	1.88225	1.11202	1.48167	0.91758	2.74408
0.62909	1.13775	1.4992	1.21505	1.47148	1.89895
0.81042	1.57798	0.85937	1.12739	1.01597	1.13898
0.99418	1.67776	0.89158	0.88057	1.21888	1.35001
1.33444	0.64652	0.81205	1.05454	0.86105	1.6501
0.91014	1.30681	0.84431	1.21193	1.1766	1.43222
1.33043	1.14884	2.16745	0.41569	1.14031	1.35142
1.40238	1.45493	0.95738	0.85511	0.85139	1.0886
1.70046	1.3588	1.11236	1.33234	1.12538	1.27301
0.83418	1.72154	1.3006	4.65485	1.22022	1.94881
1.07237	1.39958	1.42081	1.0477	0.9259	1.02123
0.949	2.39036	1.5128	1.05618	1.09602	2.17687
1.14167	1.41949	1.03416	1.89949	1.12766	1.57033
1.00126	1.50453	1.22499	0.99286	0.95856	1.23399
1.23887	1.76917	1.18048	1.19081	1.51021	1.46817
1.02748	1.26578	1.27734	1.12536	0.73033	1.68502
0.89443	1.79553	0.93332	1.02121	0.77241	2.73355
1.15831	1.30005	1.13451	0.90158	1.21212	1.72332
1.1807	1.52402	0.8032	1.21273	0.86982	1.76602
1.30608	1.63283	0.75208	1.18213	1.03222	1.51395
0.88181	1.33721	1.25211	1.35559	0.95978	0.76282
1.00707	1.36196	0.8964	0.96958	1.11774	1.35433
0.80972	2.81141	1.21532	2.78768	1.14359	0.46891
1.09133	1.04767	0.83059	0.96264	1.01024	2.98563
1.26549	1.52701	0.81945	1.25576	1.07701	3.06469
0.7386	1.71423	1.09825	0.78146	0.969	1.90712
0.85533	1.3031	1.29987	1.01903	1.47896	1.57087
0.99813	1.72257	0.8038	1.15721	1.1555	1.36744
0.86222	2.06098	0.96763	1.00777	0.43418	1.54244
1.00374	1.33647	1.151	1.05121	1.02233	0.63761
1.13185	1.16509	0.98862	1.41876	1.02145	1.89783
0.76265	1.26834	1.09933	0.90078	1.30887	1.52797
1.23664	1.34934	1.32638	1.24723	3.40042	2.25623
1.20132	1.65364	1.28788	1.32689	1.10429	0.42278
0.86544	1.25826	1.02536	0.79791	1.31474	1.7962
1.00729	1.56421	0.93475	1.18915	0.69261	2.03527
0.80691	1.60399	1.81376	1.00179	0.42601	1.08498
0.63283	1.54563	0.96226	0.98432	0.99418	2.80497
1.06393	1.63968	0.53318	1.22359	1.07886	1.81208
1.16351	1.37669	0.8758	1.01118	1.02227	0.70622
0.98817	1.13425	0.93235	1.02421	1.2682	2.53837
0.92495	1.39241	1.7003	1.00333	1.07332	1.88263
0.80164	2.22003	0.81599	0.91935	0.93273	2.29125
1.06073	1.78967	0.8627	1.23277	1.07148	0.53959
1.02383	1.23472	1.43481	1.1185	1.15855	2.37393
1.94192	1.29067	0.88824	1.48146	1.09362	1.51873
1.02335	1.48497	0.88685	1.36187	1.15023	0.61885
0.87162	1.53742	0.81363	1.2622	0.96178	1.88073
0.97956	1.3391	1.15047	0.71424	0.83774	1.40921
2.53729	1.81748	0.9106	0.95869	1.31915	1.44723
1.12927	1.42308	0.78841	1.28646	1.26666	0.78312
0.84155	1.77905	0.82408	2.3899	1.03919	1.30557
0.93694	1.32262	1.12187	0.98136	1.09311	1.54153
1.95896	1.39671	0.94638	0.92348	0.84763	1.42785
1.35609	1.398	0.8438	1.10033	1.01794	2.37328
0.89731	1.56154	1.04359	0.9522	0.80342	2.37381
0.97074	1.3387	1.11905	0.95936	0.58946	1.44924
1.11192	1.52047	1.4467	1.22479	1.05137	0.93246
0.98858	1.50061	1.18033	1.09289	0.46512	1.08401
1.77988	1.51452	1.06083	1.20892	1.08334	1.667
0.86273	1.66746	1.0804	0.99604	0.95644	1.41009
0.99674	1.20373	0.96569	1.35829	0.22268	1.41486
1.06817	1.45486	0.95156	1.07747	1.22728	1.68131
0.99558	1.63986	1.21956	0.98945	1.09589	1.83008
1.20414	1.41769	1.07805	0.91544	1.3248	3.13014
1.02714	1.17443	1.03274	0.68091	0.51664	3.62349
1.76609	1.42259	1.24767	0.85608	1.0409	0.9249
1.07921	1.65632	1.05106	0.95554	1.05753	2.11527
1.02032	1.39127	0.97252	0.93321	0.29986	2.21851
0.76055	1.31213	1.0089	0.90154	0.85226	1.11063
0.84506	1.88774	0.94992	1.00268	0.37918	2.16607
1.8466	2.14384	1.1545	0.91846	0.59386	2.56766
0.90125	1.50863	0.93176	0.91685	0.75608	1.09425
1.10178	1.3942	2.018	1.22601	1.45088	2.17432
1.07576	0.7706	1.32203	1.01224	1.52832	2.26469
0.66619	1.34353	0.9393	0.82372	0.8457	1.83664
1.18988	1.19409	1.01486	0.91383	1.26522	0.9539
1.2828	1.79651	0.84442	0.81566	0.9303	1.19933
0.5937	1.49106	1.03865	1.04986	1.21872	1.28201
0.90228	1.51407	0.49652	1.07521	0.90647	1.46659
1.06439	3.70215	1.04046	1.33869	1.14327	1.45084
0.82559	1.56691	1.40742	0.92554	1.0994	1.64217
0.6723	1.33121	0.91227	0.96061	0.80708	1.54082
0.83667	1.54439	0.70987	0.99071	1.30449	2.42303
0.75477	1.72544	1.30968	1.22106	1.24464	2.10628
0.89902	1.58825	1.93478	0.90736	0.7762	1.68485
0.98387	2.239	1.24063	1.0161	0.83377	2.01561
0.98264	1.41657	0.87406	0.87651	0.86841	0.88641
1.80526	1.42596	1.32082	0.97346	3.77109	1.36439
1.63679	2.11144	1.21099	1.0465	0.63521	1.14834
1.03435	1.73183	1.01007	0.89842	0.70397	2.18645
1.55978	1.50563	0.82646	0.92124	0.88199	2.23304
0.65697	1.58854	0.81411	0.90248	0.95752	1.93162
1.48437	1.86352	1.17398	1.23067	1.06876	1.10403
1.51041	1.70053	1.01956	1.13391	0.79789	1.32592
0.98699	1.3494	0.78692	0.3354	1.0048	0.52379
1.0009	1.51727	1.40985	1.05017	0.94262	2.52349
2.71167	2.09095	1.0683	1.09177	1.29507	1.69619
0.91817	1.89559	1.19584	0.94243	1.14548	1.18623
0.77403	1.33523	1.17254	1.02242	1.12968	1.39412
1.2324	1.43059	0.49337	1.18272	1.0133	1.69533
0.52079	1.20433	1.12206	1.32205	1.05199	1.76098
0.72724	1.70208	0.96004	1.10546	1.09317	2.03167
1.12192	1.5194	1.16054	1.08411	0.92913	1.80279
1.04838	0.59446	1.27686	1.17043	1.04759	1.27594
1.34117	1.43958	0.96184	1.19409	0.81093	2.35849
0.98042	2.395	0.45534	1.13358	1.34186	1.98256
0.8803	1.63466	0.80503	1.16346	0.93575	1.37863
1.17889	1.34047	0.93684	1.00065	1.62195	2.23529
0.76475	0.8019	0.70397	1.06421	1.3359	1.49763
0.85583	1.00255	1.01765	1.2137	1.04012	1.82823
1.49859	1.4921	0.89139	1.13015	1.23819	1.21289
1.3289	1.52637	0.95817	0.85774	0.8505	1.73204
1.22605	1.63131	1.03292	1.00801	0.91473	1.76801
0.79863	1.27034	1.33483	1.15695	1.40671	1.24241
0.93565	1.65907	0.85774	1.12562	0.78613	1.81433
1.19991	1.26731	1.44938	1.02316	1.22715	1.07025
0.91303	1.22847	4.82841	1.40498	1.20728	1.28861
1.13254	2.0764	1.04635	1.34261	0.88152	1.55534
1.00467	1.06506	0.83103	1.02043	1.18424	1.08706
0.82064	1.57534	1.18241	0.82639	0.96991	1.55188
0.91166	1.40512	1.1972	0.73192	0.92	1.53608
0.65709	1.93129	0.91035	1.11926	1.10037	1.33563
0.93721	1.49418	0.98105	2.53394	1.0352	1.20245
0.71367	1.87921	2.31642	1.09052	1.50266	1.29267
0.90418	1.71067	1.00882	0.84527	1.07528	1.54808
1.21966	1.4619	1.08212	0.84335	1.0771	1.15608
1.32041	1.05496	1.12349	0.87912	1.18957	1.61426
0.75475	1.64462	1.01346	1.39912	0.63497	2.83395
1.44538	4.02644	1.15866	1.26761	1.12152	2.10833
0.97505	1.72834	0.82923	1.13588	1.0134	1.62321
0.7529	1.51292	0.87603	0.93153	1.29395	1.52105
1.09229	1.66685	1.14908	0.9882	1.1308	2.9167
1.59576	1.50772	0.95849	1.12268	1.14357	1.06292
0.77007	1.48737	0.94305	1.07888	1.17446	2.02759
0.78938	1.66578	0.87917	0.79157	1.44979	1.14531
1.25535	1.55668	0.98554	1.17587	1.31827	1.55594
1.0373	1.5093	1.05736	0.80775	1.23904	1.43667
1.30559	1.55199	0.75237	0.76057	1.02097	0.63988
0.60629	1.25568	1.03417	1.21521	1.21195	0.75399
1.11397	0.44193	0.87748	1.04277	1.26262	3.43074
0.71089	1.84894	1.0356	0.92599	0.90875	2.16463
1.1114	1.73007	1.66391	0.97903	1.43789	1.48227
0.80898	2.34535	1.41034	1.18179	1.05436	1.20696
0.90968	0.52716	0.67816	1.04778	1.11437	1.20089
1.12191	1.09473	1.01108	1.59612	1.09908	2.04261
1.54151	1.51093	0.9469	2.03561	2.03734	1.30414
0.69933	1.58012	1.86247	1.02551	0.92181	0.96069
1.12394	1.47889	0.86607	1.17988	1.15457	0.71552
1.28717	1.65613	1.09116	1.07088	0.78735	1.81805
1.02301	1.30784	1.11953	1.1478	0.85947	1.28008
1.3937	1.33361	1.0245	1.34552	1.07186	1.57259
1.04899	1.54663	0.534	0.94527	1.1381	2.24377
1.17917	1.06506	0.96603	0.95502	1.22096	1.65873
0.80927	1.42446	1.05284	1.13306	0.94371	2.81096
1.33985	1.64449	1.19499	1.06252	1.32976	2.2932
2.16952	1.30605	0.99104	0.93754	1.05335	1.6022
0.9248	0.90565	1.1655	1.22103	5.32468	1.83565
0.95617	2.26916	1.34434	0.85649	1.13474	1.50896
1.1323	1.56785	0.90247	0.77768	1.00467	0.98431
1.06814	1.95249	1.50211	1.19683	1.1418	1.24513
1.04979	1.30257	0.77	1.01782	1.07243	1.43633
1.11489	1.57098	1.11431	0.9913	1.5279	2.39594
1.4167	1.60784	1.12587	0.87876	0.95847	2.7972
1.35761	1.29356	1.30593	1.02138	1.43931	1.33723
1.54459	1.75316	1.24954	1.11856	1.18033	1.259
0.6075	1.29639	0.82541	1.21119	1.07417	1.46386
0.66293	1.46438	1.01541	1.25231	1.01311	1.97494
0.64211	1.37836	1.56025	1.57228	1.95001	1.18214
0.80329	1.62492	1.06985	1.36254	1.26381	1.01763
1.24346	0.6976	1.31436	0.92849	0.61845	1.41597
0.9319	1.68715	1.18961	0.99174	3.15865	2.00224
1.1252	1.49829	1.22913	1.28525	1.18485	1.82305
1.11154	1.80364	1.13121	0.866	0.84938	1.75917
0.87492	1.6552	0.65345	0.89636	1.23265	1.26718
1.19712	1.46489	1.08182	1.29084	1.07048	0.46852
1.49183	1.3896	1.45894	1.062	1.05073	1.40062
0.93127	1.51989	5.28542	1.05436	1.13451	1.8996
0.98543	1.51607	0.74939	0.62901	1.03855	1.84939
0.91013	1.33715	1.12005	0.77659	0.66795	1.5315
0.73431	1.303	1.22855	1.10716	1.18904	1.44716
0.88785	1.59211	1.08596	1.58473	0.8107	1.14639
0.98489	1.58573	1.0911	0.94006	0.60894	1.27496
1.15046	1.51206	0.88856	1.12991	0.84253	0.85067
0.89748	1.13511	1.00974	0.9488	1.12992	1.34795
1.16833	1.77062	1.24829	0.8927	0.16219	1.33723
0.46921	1.42259	1.04348	1.41304	1.11419	1.61857
0.81989	1.50041	1.9261	1.08221	1.0687	1.3481
1.08004	1.80282	1.26367	1.27716	1.01963	2.32277
1.32618	2.06904	1.04604	1.11269	0.9238	1.82564
0.95497	1.48898	1.33483	0.81586	1.00315	2.00929
1.43381	1.34949	1.04733	0.9715	1.03449	1.45753
1.73685	1.3862	1.48582	1.42141	0.87081	2.46864
1.83013	1.73617	0.98023	0.97258	1.27506	1.98644
1.14788	1.16228	0.54642	0.87241	0.88749	1.71701
0.91258	1.81392	0.98284	0.91292	0.93714	2.00659
1.18256	1.89857	0.84558	1.25727	1.36029	1.39881
1.1634	1.4122	0.93394	2.97355	0.93725	0.78904
0.87613	1.82426	0.92227	1.03386	1.08576	0.86996
0.93858	1.82631	1.05506	1.08981	1.04065	3.52651
0.76209	1.54872	0.98473	1.51107	1.04255	2.18786
1.14263	1.50334	1.16259	0.97718	1.76108	1.41712
0.91112	1.72654	0.92254	0.84572	0.71045	1.93647
1.07255	1.58173	0.87978	0.84915	1.33811	1.8712
1.35486	1.64736	1.20913	1.01958	1.18651	2.28604
0.92889	1.67674	0.94404	0.93701	0.80753	1.74897
0.954	1.48049	1.03995	1.14337	0.97683	2.28426
1.4114	1.13837	0.79984	1.88784	0.99617	1.69721
0.73482	1.60987	0.92041	0.58399	1.23743	4.18158
1.19039	1.20966	1.17724	1.00451	1.2595	1.88549
1.16744	1.75473	1.09759	1.40783	1.15697	1.48637
2.00653	1.34316	0.82265	0.90065	1.10069	1.25954
0.95777	1.42983	1.15518	1.03883	0.93337	1.5284
0.98927	1.00412	0.79082	1.10806	0.85361	2.67766
0.66239	1.48877	1.39101	0.87284	0.59792	2.61572
0.86297	1.3949	1.26371	1.00877	1.03182	1.39524
1.56562	3.38343	1.58541	0.82931	1.48964	1.7517
1.14388	0.40259	1.14401	1.26038	1.28826	1.92752
1.01602	1.92406	1.1844	0.9531	0.86958	1.79073
0.95306	2.03226	0.8756	0.98482	1.10815	1.55624
0.7935	2.28289	1.07925	0.82705	0.86408	1.74287
0.90395	1.59104	0.87133	0.97628	1.35172	1.80546
1.1506	1.33927	0.93326	0.83211	1.20017	1.98385
0.83356	1.61084	0.87211	1.20981	1.24192	1.99547
0.82115	1.67473	0.92187	0.88193	1.08771	3.09057
1.08772	2.11348	0.66953	0.92144	2.16763	1.52113
1.16146	1.66264	1.3596	0.76346	1.30365	1.53114
1.38048	1.34679	0.50941	1.06552	0.99253	1.23678
0.84976	1.57767	1.11887	1.011	0.3295	1.88856
0.81789	1.477	1.23897	1.55267	0.98188	1.40098
0.67342	1.26744	1.34867	1.44163	3.39295	2.41744
1.22254	1.5174	1.11096	1.04154	0.53934	1.76021
0.9297	1.55546	0.99868	0.97528	0.55411	2.40352
0.79722	1.48643	1.4854	0.96678	1.38054	1.42381
0.90693	1.2826	0.79841	1.05629	0.82391	1.57034
1.12111	1.50745	0.68016	1.03257	1.00666	1.22069
1.25773	1.82769	0.98854	1.32687	1.22205	1.83672
0.74691	1.66819	5.13741	1.11288	0.98621	1.53629
0.70317	1.24452	1.09579	1.10659	1.05326	4.11571
1.34207	1.822	1.08971	1.1419	1.09396	2.5493
0.82017	1.46521	0.87093	1.04517	1.06072	2.21243
0.78243	1.54446	0.80585	1.06371	1.03862	1.50553
1.34648	2.49616	1.01505	1.01589	1.21314	1.09239
0.85287	1.50907	1.20609	1.0615	0.77463	3.05387
1.15033	1.14336	0.9945	0.99826	0.95244	1.09215
0.97145	0.68768	0.9617	0.78618	0.86235	1.60003
1.16594	1.26762	0.60601	1.0024	1.09716	2.26722
0.8636	1.58292	1.29339	1.1022	1.05699	1.23737
1.24215	1.65609	1.1704	1.25375	1.09005	1.36939
1.28322	1.45147	0.96183	1.07556	1.10271	4.13203
0.7646	1.61148	0.82021	1.17384	0.93903	1.44924
1.09905	1.56914	1.26563	0.98016	1.36075	1.54396
1.59009	1.43226	1.15439	0.58122	1.42562	1.9215
0.7046	1.26596	1.17147	1.14802	0.74838	1.11475
1.30668	1.61088	0.96889	1.34416	1.49116	2.39869
1.13639	1.30687	1.00999	0.99871	0.87501	1.30429
1.20067	1.47202	4.81391	1.10212	0.72699	1.5578
0.97126	1.58855	0.9548	1.09895	0.72931	2.78666
1.27038	3.70547	1.37388	1.036	0.95079	1.72258
1.2013	1.67255	0.69997	0.79766	3.9292	1.25646
0.84006	1.44126	1.00298	1.03039	0.89336	2.37302
1.09398	1.6512	0.81602	0.91179	1.25835	0.71215
0.89852	1.58354	1.29662	1.04361	1.07274	2.13348
1.02356	0.76865	0.96536	0.95831	0.94317	1.34121
0.91482	1.34695	1.13799	1.01921	0.90207	1.38456
0.81784	1.53745	0.90997	1.14588	1.07034	1.52575
1.05653	1.44078	1.11139	0.94571	1.02977	2.49857
1.74703	1.35388	0.84145	1.18414	1.41639	1.90399
0.701	1.60996	0.99925	0.88626	0.86155	1.53902
0.79853	0.54793	1.25919	0.94227	0.95884	2.20967
1.4184	1.34657	1.14686	0.87064	1.15968	1.96607
1.42918	1.40513	1.69123	0.95102	1.18207	2.11822
0.97223	1.63795	0.8867	1.32134	1.20449	1.92393
0.89218	1.46127	0.73214	1.04351	1.0669	1.59686
1.09503	1.28906	0.99395	1.01336	1.22059	1.54059
1.25519	3.24244	3.12268	0.97249	1.40249	2.19017
1.23671	1.65774	3.37529	1.02961	1.23058	1.84963
0.9582	1.4984	1.32274	0.77455	0.85079	2.36094
1.50358	1.50853	1.1166	1.05126	0.88428	1.57984
1.44906	1.35612	0.82598	1.26842	0.9626	2.35938
1.19904	1.55949	0.91821	0.97291	1.23211	3.05204
1.60662	1.23194	0.87966	1.0705	1.43871	1.08022
1.04829	1.63247	1.07504	1.20657	0.87886	1.90532
0.99207	2.0518	0.8531	1.38415	1.24776	1.49512
1.03013	1.48337	1.09173	1.22229	0.85686	1.55519
0.82249	1.19162	0.78716	1.51561	1.07376	1.5931
0.62915	1.32948	1.1205	1.82799	1.18634	1.74582
0.73471	1.36482	1.2447	1.02679	1.21837	3.16769
0.82966	1.37203	0.90014	0.80425	0.97999	1.57799
1.5833	1.48769	1.02489	1.33611	1.13168	1.75742
1.03227	1.50554	2.07778	1.1413	0.79399	1.28095
1.60958	1.37345	1.30016	1.82335	1.23691	1.46414
1.81139	1.23282	1.02969	1.10513	1.93212	1.63039
1.38655	1.61657	1.17019	0.82935	1.3163	1.09113
1.01535	1.78237	1.11455	0.7681	0.46911	1.06676
1.02283	1.75123	1.02328	0.92807	1.12826	1.85014
1.00977	1.63042	1.14115	1.03017	1.5004	2.07164
1.22577	1.44983	1.01209	1.2696	0.95421	1.66
1.1227	2.07039	0.83137	1.05168	0.87691	1.96569
1.01244	1.38544	0.90879	0.95961	1.03647	2.42596
1.03166	1.54863	0.99238	2.78281	0.88307	1.92888
0.70016	1.39755	1.97824	1.28329	1.20226	1.16486
1.36149	1.08224	1.33288	0.96135	0.92436	2.14763
0.99595	1.37075	1.48153	1.24129	0.98557	0.42839
0.96462	1.44163	1.04897	1.19195	1.36905	1.38501
0.96887	1.47902	1.06979	0.88091	0.89597	1.73655
0.86166	1.58282	0.96673	1.25622	1.11178	2.67024
1.00218	1.50458	1.52907	0.88497	0.94343	1.15332
0.94121	1.56569	0.8697	0.77536	0.91125	1.67371
0.87656	1.52872	1.46328	0.90571	1.57152	2.36512
1.06257	1.18527	1.15789	0.95331	0.97496	1.703
1.42091	1.43392	0.95011	0.85555	1.81967	3.03304
1.49936	1.88541	1.30944	0.89902	1.24283	2.97409
0.90024	1.15662	1.0522	1.43179	1.45084	1.68702
0.74033	1.30592	1.39664	0.90227	1.15032	2.30882
0.81672	1.482	0.87537	1.03445	1.06513	1.76947
1.17952	1.7812	0.96792	0.91102	1.05624	2.09285
1.36415	1.49352	1.48526	1.41834	0.90583	1.51102
0.99467	2.03897	1.10416	1.14078	0.99883	1.42343
1.5548	1.11452	4.07215	1.08141	0.9101	1.22144
1.01089	1.71132	0.85863	1.13236	1.32071	2.01374
1.63375	2.0308	1.79039	1.32107	1.30933	1.39364
2.17085	1.52205	1.28461	0.85573	0.86396	2.625
1.63871	1.9465	1.09864	1.95058	1.242	2.10329
0.97984	1.19515	1.2355	1.00689	0.55565	1.49263
1.04396	1.84014	0.99568	0.98061	1.04761	0.87083
1.01313	1.36604	1.09228	1.09675	1.27002	2.7495
1.14325	1.92856	1.09961	1.13309	1.34812	1.79244
0.95694	1.33895	1.30298	0.84652	1.23308	2.59075
0.85217	1.35603	0.96812	0.64481	1.01406	1.56292
1.38609	1.35563	1.02278	0.90307	0.91567	1.46494
0.7305	1.42952	0.87945	1.09775	0.99493	1.97295
1.09017	1.27782	0.19118	1.14039	0.91588	2.07323
1.16878	1.93464	0.63361	0.98017	1.1684	1.54046
1.52242	2.09047	1.16659	1.7702	1.32413	2.30926
1.19068	1.43462	1.13852	1.47957	0.98602	1.78868
1.09343	1.85323	5.37795	0.97392	1.09552	2.59345
1.52832	2.19463	0.78598	0.99635	0.93288	2.03041
1.07314	1.69553	1.45203	1.0107	0.85209	0.5668
1.19249	1.33525	1.29585	1.20229	1.01033	1.66478
1.39377	1.93404	1.18592	0.99424	0.89403	2.35658
1.02233	1.29575	0.8864	0.91667	0.83897	1.4009
0.64514	5.39027	0.84929	1.05472	1.94456	1.15079
1.46753	1.79469	0.88351	0.92582	1.30928	1.2979
0.88314	1.42972	1.12953	1.44723	1.14551	1.6582
0.98472	1.40812	1.67377	1.21007	0.93788	3.01572
1.41695	1.64128	1.64567	1.16606	0.80352	1.61164
1.00261	1.75585	1.35693	1.2209	1.06734	2.34158
0.97548	1.50221	1.19816	1.14478	1.72044	0.48494
1.72478	1.42873	1.06654	0.8696	1.06462	2.00421
0.86738	1.61188	1.09495	0.97021	1.15312	1.91362
1.13495	1.07152	0.97755	1.00175	0.90802	0.80694
0.94752	1.64828	1.02679	1.10424	0.5812	2.39536
0.88081	1.28786	1.36709	0.9329	1.17617	1.04449
1.29089	1.44851	1.03486	1.20426	0.84441	1.98957
1.04072		0.73434	0.93076	1.03164	1.55558
0.67264		1.05681	1.11859	0.93697	1.14545
0.64982		2.96516	1.00561	1.18961	2.31319
0.82042		1.20581	1.00402	1.12957	1.8413
0.86294		1.1873	1.6025	0.80679	1.86247
1.40938		0.94982	0.9281	1.30589	1.51396
0.98258		0.90637	1.23395	1.0618	1.8716
0.67827		0.77337	1.18759	1.67443	0.34555
0.77992		1.23741	1.13628	0.98127	2.10314
0.92616		0.81439	0.99008	1.06843	1.69584
0.67069		0.857	1.15909	1.0275	1.78163
1.08467		1.22409	1.48916	0.82483	1.57147
1.39443		0.93318	0.67609	1.11852	1.46937
0.68738		1.55552	0.96308	0.35015	1.32156
0.74873		0.94666	1.70094	1.1429	1.34478
1.08023		0.83684	1.09968	0.31233	2.02484
0.84548		0.86625	0.97374	0.98624	1.51566
0.66544		1.18803	0.82908	1.00314	1.85942
0.89215		1.18806	0.79397	2.15897	1.62236
0.83245		1.31383	1.66014	1.28894	1.42725
1.10502		1.01667	0.98685	1.22121	2.05199
1.04889		0.86487	1.1084	0.9588	2.31571
1.0639		1.83904	1.21664	1.13034	0.8937
0.98503		0.73007	1.16963	0.96368	1.56108
0.97199		1.21368	0.84188	1.25456	2.60409
0.90081		1.0249	1.16274	1.26545	2.29802
1.07295		0.89185	1.05815	1.00592	2.34494
1.02711		1.27163	1.09976	1.00433	1.55378
1.0632		1.20249	1.0161	1.11406	3.50889
1.17228		0.86928	0.84812	1.37581	1.4426
1.19005		1.03123	1.17608	0.86099	1.42273
1.68501		1.07057	1.00139	0.98763	1.67558
0.86608		1.10474	1.11577	1.35314	1.82709
0.82419		0.95712	0.87211	1.38341	1.41315
1.33699		1.27343	0.8824	0.87681	1.28594
1.08368		0.93904	1.27334	1.00205	1.40488
0.95594		0.67225	0.98548	1.1364	0.98838
1.64492		1.10437	1.20156	1.29195	1.31638
1.46889		1.02733	1.21542	3.26948	3.37111
1.24383		1.16666	3.83826	0.97361	2.3906
0.83358		1.24759	0.93234	1.07117	1.2742
0.86529		0.47013	0.78159	1.01058	1.92712
0.83418		1.34212	0.70832	0.92082	1.15038
0.88245		1.02754	0.68398	1.35094	0.98911
0.78584		0.81892	1.21947	0.71704	0.9984
0.85807		1.42146	1.31977	0.93007	1.38256
0.73456		1.16592	0.91877	0.84098	2.42792
0.98481		1.35741	1.16701	0.95958	0.60403
0.72462		0.97123	1.25776	1.14917	2.14564
1.1146		0.89218	0.78672	1.07807	1.37339
1.17787		0.97134	1.24	0.86341	1.33332
0.99757		1.22716	1.14246	1.41915	1.90553
1.58		1.43438	1.27505	1.05288	1.38576
1.12132		1.19045	1.03423	0.94337	1.77318
1.3139		1.25662	0.96545	0.98729	2.24257
1.07331		1.00964	1.00191	0.98876	1.75257
1.00385		1.28821	1.10441	1.21114	2.40995
0.73648		0.96284	1.34084	1.84895	1.03261
2.05383		0.88558	1.10604	1.06366	3.19793
1.09796		0.69222	1.00005	1.01743	1.30788
2.16203		1.16617	0.91764	0.96973	2.31607
1.19059		1.25477	1.61696	1.13542	2.399
0.93984		0.9207	0.77119	0.89872	2.09771
0.74962		0.86769	0.90426	1.0612	1.19621
1.30857		1.08437	0.91864	0.80565	2.37188
0.7079		1.22704	1.04944	0.92199	3.89979
0.91481		1.24016	1.23946	1.02904	1.95133
0.73761		0.97791	1.43476	0.70442	3.10344
0.93319		0.8806	1.16627	0.99872	1.24034
0.92466		0.99559	1.00205	1.04018	1.81881
0.96297		0.86217	1.00418	0.97242	1.22347
0.93934		1.541	0.88044	1.55878	0.99366
0.73777		0.68854	0.938	0.92857	2.05032
1.12229		1.1746	1.14615	1.0462	2.51216
1.49144		0.94405	1.12747	0.77872	1.7531
0.84236		1.60069	1.36043	1.09603	1.65059
0.95203		1.05734	1.11344	1.09721	0.71883
0.89742		1.31167	1.16193	1.49834	1.94723
0.74976		1.88141	1.32594	1.15457	1.59637
1.08071		0.71719	0.94415	0.76376	0.84003
1.53805		0.65945	1.16413	0.92645	1.0648
0.84719		1.8098	0.99276	0.22243	1.58227
1.04068		1.11835	0.94565	1.34836	1.79434
0.85978		1.25967	1.15227	1.00877	0.64396
0.67092		1.92319	0.93375	0.79817	1.17861
1.29108		1.01592	1.20396	0.84951	1.62911
1.04163		1.01279	1.22971	1.37885	1.44606
1.61776		3.15718	1.37708	0.9603	1.62119
1.46365		1.02314	1.41335	0.79973	1.41108
0.74731		2.14238	1.26551	1.27969	1.08453
1.19182		0.96439	1.15468	0.96809	0.57295
1.11521		1.94767	1.10176	1.16267	2.145
0.81951		1.15242	1.46836	1.41364	1.91239
0.78898		1.06009	0.83587	1.07591	1.77144
0.89127		1.15425	1.05257	0.97625	1.91188
0.8937		0.98572	0.85755	1.10176	2.69987
1.06694		1.17844	1.25355	1.85724	1.88365
1.1081		0.69842	1.29292	1.1904	1.37788
1.29373		2.51325	0.99986	0.95078	1.47833
1.167		1.10591	0.81463	1.27727	1.38777
1.24935		1.6169	0.97175	0.13885	1.25548
1.57343		0.81537	0.9702	0.81938	1.09086
0.88041		1.15362	1.12292	1.1887	0.88115
1.09594		1.00631	0.84853	1.1045	1.64547
1.05406		1.19664	1.56301	1.13656	1.59217
0.90597		1.28325	1.11575	1.07075	1.90643
1.47427		1.43226	1.22951	1.16021	1.50084
1.19197		1.15004	1.00615	1.00563	1.66501
0.71543		1.32448	0.88665	0.87229	2.56392
1.52788		1.46758	1.00031	1.04839	1.5995
0.78047		0.9901	1.10007	0.86097	1.19186
1.70422		1.08473	0.81168	1.2906	0.67428
0.8997		1.04892	0.88074	1.33225	1.52982
1.06535		1.1513	0.75913	1.14214	2.91714
0.92297		1.40578	0.8704	1.18341	2.1214
1.00654		0.8231	0.80974	1.13351	2.93482
1.27498		1.606	1.37145	1.26814	1.91653
0.96298		1.57166	0.9231	0.87087	1.87754
0.9212		1.01637	0.90501	1.48507	1.29058
0.86063		1.15368	1.01188	1.03712	1.76388
0.89456		0.97594	1.277	1.16872	2.48817
1.04566		1.20237	0.9872	0.89614	1.21979
0.84147		0.93446	1.13473	1.23972	1.43461
1.15261		0.73391	0.84819	0.96701	1.18174
0.96097		0.8793	0.87855	0.87256	1.16478
0.73962			0.9632	0.96036	1.41835
1.23628			3.27674	1.26222	1.65471
0.72685			0.80098	4.81557	1.8397
0.88448			1.00506	1.84543	2.05214
0.66946			1.08221	1.10998	2.48396
0.86805			1.06014	0.54356	1.82978
1.03063			1.03574	1.04722	0.91903
1.03584			0.96702	0.79515	1.77816
1.26358			0.9604	1.22585	2.10536
1.25997			0.99106	1.0385	1.28452
0.58798			1.47101	1.28732	1.3776
1.00954			0.95801	1.27808	1.77734
0.79679			1.05168	1.17065	1.85894
1.49199			1.01276	0.90193	1.39125
0.8617			0.8871	1.10995	2.64266
1.47255			1.3333	1.21478	2.45471
1.27779			1.08028	1.08826	1.94001
0.9387			3.91918	1.43641	1.33026
0.71906			0.79804	1.4154	0.78394
1.12591			1.1019	1.02166	1.21362
1.02144			1.45437	1.97665	0.89985
0.87216			1.09057	0.43797	1.38177
1.19708			1.04641	0.97271	1.52841
0.94413			1.0484	1.18049	1.10162
0.75029			1.08473	0.33138	2.14116
1.54417			0.84591	0.97335	2.31765
1.08805			1.23192	1.15474	1.76507
0.79343			1.4504	1.08346	1.41575
1.24635			0.98005	1.08998	2.21031
0.99445			0.81805	0.85923	1.31809
1.67056			0.97907	1.00125	1.8567
0.60839			1.19982	1.09395	1.0042
0.63685			1.07473	1.10885	1.98527
1.0384			1.06364	0.83147	1.54078
1.09027			1.29765	0.86817	1.82567
0.83029			1.23369	1.25222	1.99066
0.8998			0.54512	1.56374	1.62658
0.88966			1.65197	1.0185	0.76436
1.09842			1.14378	1.03373	1.19619
0.42925			2.78033	0.90168	1.34935
1.1824			0.86755	1.04463	1.69421
0.88729			1.35958	0.95221	1.40803
0.68509			1.21068	0.91366	2.47499
0.77166			1.17969	1.11347	1.4847
1.07778			1.76552	0.896	1.66236
1.11297			1.04896	0.98483	0.50426
1.08348			0.97801	1.41437	2.41961
1.83393			1.80963	1.1681	1.55668
3.58642			1.96345	1.00422	1.98224
0.99733			1.06581	0.99688	1.78037
0.83421			0.81795	1.28865	1.19218
0.89543			1.1277	1.32429	2.28449
0.93964			0.94319	1.64529	0.53208
0.92977			0.94875	1.11614	1.31583
1.13435			1.29214	1.4017	1.6911
1.00331			1.09054	1.29145	1.43756
0.89783			1.33483	1.04335	1.84253
1.64943			0.83515	1.20752	2.21383
0.70233			1.23835	1.24808	2.33215
0.99079			1.01392	0.47658	0.90792
1.012			1.61817	1.20783	2.38913
0.90172			0.85836	0.56314	0.73525
0.58213			0.86571	1.06136	2.18693
0.79101			1.40756	1.02136	0.65286
1.29061			0.99444	1.13374	1.4597
0.70066			1.00221	1.74157	2.78151
1.20252			0.95374	1.03007	1.89584
0.91514			1.12753	0.92971	2.05195
0.93324			1.14856	1.04403
1.03001			0.99955	0.92633
1.90753			3.10565	1.37194
0.81818			1.53245	1.11594
0.75463			1.02459	0.85367
0.85214			0.80447	0.97029
1.07514			0.97007	1.00789
1.24455			0.78505	1.13168
0.92798			0.75053	0.71364
1.36748			0.9506	1.06181
2.06699			0.81538	0.96348
1.1154			1.27659	0.8403
0.98223			1.57575	0.83474
0.86565			1.03951	0.71542
0.86145			0.97587	1.76988
0.81836			0.95254	0.90467
0.86974			0.85968	1.50104
0.85178			1.16969	1.41078
1.05327			1.3009	1.082
0.9213			1.16836	0.77936
1.61842			1.49294	0.9725
2.12057			1.16085	3.11874
0.76739			0.98018	1.0549
1.16167			1.14368	1.41289
0.80741			1.03456	1.13245
0.85			1.05088	1.12186
1.08521			0.8533	1.71695
0.85945			1.89163	1.42284
1.38493			0.88136	1.14674
0.84566			2.68993	1.08023
0.90442			1.20653	1.07021
1.2565			0.9414	1.63308
0.83025			1.14272	1.01289
0.86395			1.22789	1.03952
1.33912			0.84813	1.07344
0.82383			1.67215	1.41277
0.98225			1.09161	0.98453
0.74275			1.12649	1.19456
0.68019			1.18613	0.97941
0.76363			1.2958	1.17957
1.41819			1.06858	0.2974
1.16435			0.73449	1.19457
1.26686			0.94194	1.0983
1.16495			1.0937	0.84563
0.68057			1.29634	0.85658
0.66792			0.91391	0.91509
1.1842			1.36374	1.53384
0.77923			0.88083	0.79009
0.95794			1.02169	0.95577
0.78949			1.38194	1.03554
0.76333			1.47034	0.82036
1.03527			1.30132	1.16851
0.91326			0.97577	1.09055
1.04097			1.03706	1.13013
1.25572			1.45386	1.04517
0.76108			1.7606	1.02346
0.92686			0.83488	1.05214
0.9184			1.19042	1.19558
1.64896			0.8942	1.16511
1.10743			1.30233	0.93128
0.91433			1.33828	1.04142
1.49711			0.8807	0.68307
1.13074			5.0008	1.07567
0.62378			0.79647	1.30394
0.94082			0.95863	0.78191
0.90697			1.09459	1.03789
0.94131			0.6784	0.94733
0.81612			1.43568	0.81418
0.92733			1.04565	1.13846
1.37894			0.86078	0.98634
0.73218			1.45579	0.8056
0.83427			0.89103	0.99804
0.76957			1.04618	1.20177
0.94018			1.00688	0.99387
0.92155			1.43513	0.35264
1.08486			1.74757	1.02996
0.66922			0.9214	0.97071
0.90796			0.88829	0.86483
0.7216			1.19349	0.85252
1.8116			1.06689	1.1433
0.98046			1.02579	1.10247
0.91309			1.46986	1.0359
1.439			1.07102	1.08932
0.9283			0.80734	0.91896
0.90521			1.16973	1.38927
1.1509			0.92621	0.73061
0.91273			1.23888	0.89773
1.34571			1.11925	1.18991
0.86865			1.11309	1.12937
0.72778			1.02146	1.34306
1.2642			0.91767	0.98939
0.86214			0.65149	1.45524
1.14175			1.23057	1.25261
0.80073			0.88298	1.54365
0.7482			1.00767	0.89093
1.11445			0.86343	1.26598
0.95065			1.17738	0.81926
1.21582			0.72352	1.06803
1.27228			1.00249	0.86464
0.93198			1.03185	0.89417
0.8866			1.05826	1.79343
1.12042			1.21976	1.00331
1.01853			0.97798	1.48231
1.53863			1.1025	0.88082
0.87781			0.94438	1.32868
1.11104			1.22048	1.13833
1.06286			1.1418	1.35248
1.15613			0.95698	1.54498
1.19964			2.98708	1.01878
0.95664			1.19418	1.23622
1.16111			0.78808	1.2279
1.37776			1.1271	1.045
1.05431			1.05816	1.07634
1.16745			1.03137	0.95322
0.74902			1.09627	1.06845
1.31002			1.16962	1.34415
0.87839			1.24983	1.00395
0.75694			0.91053	0.99414
1.13807			0.86586	1.03992
0.99228			1.02814	0.59789
0.76449			0.93004	1.40067
0.75543			0.47147	1.27171
0.82857			1.14116	1.00949
1.03886			0.93144	0.92524
0.98163			0.95519	1.10298
0.93969			1.0851	1.20361
1.2009			1.11816	0.98554
1.03579			0.8973	4.14474
1.23235			0.83843	1.19494
0.72767			0.95861	1.05363
1.05328			1.21162	1.05037
1.10991			1.18831	1.34639
0.99656			0.90457	0.92058
1.42734			1.00985	0.93196
0.83554			0.74901	0.9885
0.8949			1.12122	1.12303
0.84591			1.32991	0.96832
0.89862			0.9165	0.77369
1.08721			1.06221	0.82283
0.81324			1.20746	1.16837
0.74975			0.94757	0.83352
0.94727			0.92451	1.16463
0.88651			0.82125	0.95608
0.92988			0.80513	1.07779
0.82756			1.04126	1.0516
0.89523			1.03488	1.01428
0.91206			0.85722	1.12397
0.82874			0.98792	0.97356
0.93347			0.66815	1.46611
1.00284			0.87425	1.15055
1.08008			1.04065	0.8398
0.78709			1.0609	1.00669
1.27683			0.93431	1.04974
1.12232			1.11555	0.99857
0.81457			1.26501	0.9035
1.14825			1.06041	1.12388
0.65766			0.90662	0.87485
1.07468			1.05095	0.95029
0.88804			1.01842	1.38897
1.09842			1.29546	0.91523
1.35495			4.91482	1.06391
1.87572			0.84806	1.07137
1.13862			0.99552	0.96984
0.83918			0.99269	1.02843
0.69578			0.8653	1.23898
0.86535			0.88576	1.09083
1.57047			1.49256	1.30645
1.91663			0.8205	1.15381
1.2654			0.84636	0.90174
0.98714			0.92597	0.98947
0.78896			1.11342	1.32937
0.89167			0.81792	0.94618
1.01775			1.29839	0.28513
0.57591			1.07794	0.89864
0.76788			0.97492	1.33577
1.74149			0.83402	1.42823
1.23126			1.09898	0.71489
0.93429			0.99904	1.06732
0.68614			1.3656	1.0435
0.67102			1.16251	1.08649
0.86015			1.00973	0.98104
1.01537			1.593	1.15456
0.86223			1.10741	1.0869
1.41343			1.03262	0.95672
1.0656			1.31481	0.93962
0.94034			0.45571	0.98346
0.87216			0.94678	1.18748
0.72714			1.28573	1.26317
1.31926			1.31896	1.06254
1.27091			0.80354	0.97272
1.28628			0.88988	1.30273
0.80701			1.09338	1.12457
1.42023			0.97587	1.28594
1.33488			0.9821	0.30747
0.75775			1.11655	1.33062
1.57628			0.86742	0.96098
0.80375			1.41886	1.32327
1.29289			1.01127	1.05183
0.96629			1.12563	1.17319
0.84433			1.07747	0.87245
0.90983			0.95834
0.89265			1.79939
0.97217			0.98152
0.65172			1.08226
1.02089			0.88752
1.01659			1.02704
0.89697			0.89753
0.86439			0.74316
0.86542			0.92463
1.1476			1.39307
0.71033			1.04842
1.28023			0.94019
0.93489			0.8036
1.28977			0.8907
1.05745			1.0177
0.68435			0.88221
2.33031			0.92045
1.19202			1.01962
0.72695			1.56503
1.16966			1.32329
0.91861			0.94392
1.09505			0.93859
0.79824			0.78017
1.02848			0.99954
0.80709			1.0293
0.74815			1.1041
1.13317			1.20961
0.64048			1.77115
0.63277			1.19973
0.7672			0.85369
1.56804			1.13069
0.90963			1.01728
1.04378			1.24566
0.82575			1.08404
1.04621			0.93403
1.20443			0.87858
0.80194			3.48908
1.38938			1.07257
1.63318			0.8395
0.83399			1.07107
0.77331			0.88394
0.66835			1.01002
1.06799			0.95279
1.43675			1.85606
0.77147			1.31968
1.10434			0.94046
1.12725			1.29151
0.94835			1.05232
0.99984			0.7049
1.20888			1.35228
1.05771			0.99076
1.34936			1.11291
1.1156			0.99718
0.96828			0.94573
1.483			1.19807
1.28004			2.21927
0.88068			1.18257
0.7043			0.96303
1.38064			1.0921
1.00769			0.90782
0.99842			0.96472
0.871			1.13541
1.16883			1.25032
0.78958			0.9812
0.93269			1.04283
0.93924			1.04748
1.09962			1.15685
1.36716			1.14531
0.60709			1.1033
0.95684			1.20926
0.91664			1.35967
1.40309			1.29958
0.89779			1.06038
1.21247			1.04337
1.17644			1.01135
0.79022			1.09914
0.64588			1.10734
0.89526			1.11236
0.89362			1.53509
0.92912			1.21202
0.87924			0.81004
0.93413			1.33622
0.95877			0.97896
0.55198			1.18323
0.85869			1.06238
1.92465			1.04791
1.16888			1.07286
0.88553			0.83466
0.62693			0.48514
0.64063			0.76304
1.06346			0.81103
0.47244			0.88789
1.07927			1.3702
1.54436			1.26373
1.20846			0.89587
1.00876			0.8159
0.90673			0.81506
1.58207			0.76599
1.52732			0.91846
1.14359			1.28159
1.14674			0.98744
0.79185			1.03052
0.74655			1.25779
1.05681			0.94096
1.19113			0.94871
0.93067			1.38117
1.10229			1.03976
0.92101			0.9102
0.74392			1.0059
1.04692			1.01864
1.35172			0.99732
1.16378			3.24877
1.09009			1.0365
0.98643			0.81028
1.07102			0.81449
0.72493			1.16439
1.03772			1.62124
0.75838			1.01976
0.86261			1.09512
1.47594			1.21618
0.64882			1.06138
1.18294			0.93641
1.11777			0.83329
1.90791			0.87301
1.12811			0.7829
1.75209			1.24853
0.89254			0.9641
0.76012			1.50861
1.03203			0.97139
1.32115			1.16351
0.78295			5.12057
1.05555			0.95673
1.25683			1.01993
0.74248			1.3763
1.18179			0.7124
1.04781			0.98551
1.01194			0.98488
0.71455			0.81591
1.08721			1.14176
0.82466			3.08572
1.09591			1.0244
0.99141			0.98211
0.87411			0.85805
0.77173			0.85994
0.66207			0.95649
1.0274			1.10063
1.21672			1.53505
1.36037			0.99843
0.81163			0.83501
1.24643			1.13003
0.66483			1.00394
0.57028			1.30098
0.8281			1.80015
0.91344			1.0694
0.77585			1.15
0.7681			1.0556
1.31012			0.94358
0.85504			1.01111
0.99071			0.80603
1.09081			1.02605
0.9188			1.00365
1.10433			1.09906
1.34034			1.35929
0.96196			0.71694
1.03578			1.52552
1.05987			1.18293
1.11659			1.1666
0.81739			1.25962
1.60361			1.05312
0.96934			1.28799
0.80765			0.99414
1.10344			0.95332
0.71516			1.17517
0.89073			0.79604
0.87118			1.12752
1.0945			0.96762
1.15832			0.82897
0.88893			1.23026
0.98419			1.18163
0.94487			1.31326
0.7597			1.17927
1.02375			0.96221
0.9585			1.17255
0.97185			1.01057
0.81957			0.96127
0.91639			1.21207
0.67395			1.03256
0.70698			0.91103
0.97842			0.99428
0.70686			0.79433
0.88977			1.33971
1.20021			1.06047
0.75809			1.24151
0.94861			1.21317
1.18576			0.84541
0.98996			0.82663
1.06952			2.82496
1.06698			1.14401
0.71608			1.17427
0.63201			1.07756
0.59007			1.1895
0.84981			0.94073
0.90026			0.99761
0.94396			1.10708
1.00058			1.25219
1.36293			0.77062
0.62699			1.23468
0.72584			1.08842
1.14542			1.10092
1.14294			0.97548
0.69634			0.91124
1.3071			0.92917
1.14549			1.14883
1.06364			1.43126
2.72538			0.93442
0.86616			1.07135
0.92761			0.87866
0.93463			0.83598
0.73119			0.82749
0.74528			0.90167
1.02371			0.91172
1.48432			0.99646
0.89398			0.77947
0.78982			1.02435
0.57621			0.8389
0.71017			1.32039
0.9075			1.07545
1.01273			1.08146
1.16198			1.21621
0.7203			1.03681
2.15521			1.16102
1.4382			1
1.11987			1.0722
[truncated: 2,033 more rows]

## Sheet: NADP_cyto
Control	NA	NAM	NMN	NR	FK866	6-AN	Metformin	Phenformin	Rotenone	Oligomycin A				Control	NA	NMN	NR	FK866	Metformin	Phenformin	Rotenone	Oligomycin A
0.82787	0.91944	1.20277	1.08125	1.06464	1.0914	0.90371	0.96559	0.6587	0.24478	1.18722			min	0.605683	0.552195	0.559551	0.59087	0.586334	0.549894	0.525787	0.422522	0.688303
1.00549	0.55046	0.97682	0.85544	0.97683	0.79068	1.3262	0.92094	1.01359	0.79584	1.34314			25th	0.90527	0.894151	0.88982	0.901112	0.903882	0.853745	0.760363	0.711821	1.22475
1.1573	0.94168	1.35139	0.96728	0.89944	0.54149	0.88538	0.8611	0.59618	0.49473	1.19912			median	1	0.997705	0.991814	0.996274	0.998625	0.950958	0.835728	0.801058	1.36909
1.04838	0.9982	1.1468	0.95608	0.54337	0.98405	0.97794	1.13691	0.61359	0.82585	1.28665			median	1	0.997705	0.991814	0.996274	0.998625	0.950958	0.835728	0.801058	1.36909
1.03113	0.79125	1.03136	1.33422	0.744	1.19184	0.85671	0.96061	0.95014	1.00717	0.66451			median	1	0.997705	0.991814	0.996274	0.998625	0.950958	0.835728	0.801058	1.36909
0.70768	0.99677	0.99724	0.79488	0.9082	0.78181	0.76772	0.97825	0.61852	0.85353	1.47781			75th	1.10499	1.12212	1.11	1.10794	1.11558	1.05631	0.916746	0.904687	1.58237
1.115	0.88706	1.07343	1.11554	1.06917	0.53578	1.11575	0.66999	1.13522	0.73756	1.04166			max	1.40458	1.46408	1.44027	1.41818	1.43313	1.36016	1.15132	1.19399	2.11882
1.32541	0.73053	1.09071	1.17617	1.01444	1.23459	0.95818	0.89039	0.77798	0.99318	1.13393
1.22702	0.99184	1.02957	1.02472	0.89983	0.89034	0.66604	0.98417	0.77017	0.7706	0.70955
1.10085	1.05287	1.23629	0.7877	1.11156	0.66812	0.9726	1.07773	1.00627	1.29281	1.44249
0.73506	0.87807	1.02798	1.15256	1.04878	1.00193	1.05006	1.04486	0.65395	0.72452	1.44136
0.78018	0.88008	0.99174	1.03252	0.97622	1.25765	0.89614	1.00565	0.8425	0.89231	1.10528
1.20313	0.63853	0.98786	0.78688	0.90299	1.23627	0.95449	0.78702	0.8872	0.90728	1.08713
1.05655	0.76164	1.05912	0.82885	0.74547	0.7681	0.82456	0.96951	0.67584	0.48895	0.95563
0.89169	0.99059	0.84717	1.00433	1.10779	0.60907	0.96749	0.69054	0.89346	0.67135	1.43413
0.6674	0.9185	0.98569	0.91716	1.09813	0.47978	0.84686	0.33968	0.81114	1.02038	1.45192
0.97288	0.86452	1.14092	1.07495	0.89746	1.0067	0.92806	0.99563	0.79485	1.08438	1.20748
0.84641	1.01147	1.29823	0.53134	0.92834	1.24692	0.83151	1.00454	0.85166	0.69731	1.04286
1.08279	0.88254	0.80042	1.06799	0.89132	1.19379	0.77685	1.08849	1.0332	0.73131	1.11209
0.86944	0.98723	1.25777	0.98321	0.89959	1.23119	0.62155	0.90141	1.72522	0.33481	0.96043
0.97656	0.93477	1.66285	1.03119	0.5922	1.2091	0.89325	1.00562	0.96743	0.79413	1.12337
1.17626	1.0307	0.93684	0.93172	1.3626	1.13101	0.9435	0.47488	0.89997	1.47134	0.84892
0.98814	0.89698	1.19156	0.98869	0.91112	1.02488	0.57529	0.93191	0.67844	0.81648	0.98243
0.77725	0.77834	1.1221	1.10825	1.04276	1.154	0.78065	1.0548	0.77721	0.58036	2.24443
1.13757	1.1434	0.99008	0.89858	1.16059	1.13434	0.78488	1.11878	0.96837	0.80664	0.98699
0.81974	0.96057	1.10903	1.23735	1.04803	0.58421	0.58543	1.0312	1.02997	0.57823	0.93265
0.76793	1.12997	0.51446	1.11588	0.99221	0.95759	0.74926	0.89472	0.74215	0.82585	0.59134
0.47089	0.86691	0.84765	0.94114	1.0741	0.96265	0.83996	1.01983	0.91949	0.81894	1.02585
1.12095	0.85428	1.16292	0.93255	0.91325	1.46003	0.82704	1.25937	1.00367	0.58068	1.14553
0.97708	0.85443	1.07049	0.9279	0.99086	1.0753	0.77382	0.69545	0.65425	0.97308	0.81908
1.01432	0.85507	1.13808	1.60305	0.84071	2.21919	0.72499	0.86416	0.87077	0.83217	1.12401
1.13039	0.96924	1.17201	0.90463	0.8284	0.92508	0.94923	0.93243	0.92226	0.38279	1.04648
1.16011	0.9195	1.0464	0.63673	0.95897	0.89541	0.82146	0.62246	0.55749	0.56699	1.69163
1.03402	1.25152	1.4562	0.95356	1.27252	0.72162	0.75668	0.96165	0.67054	0.55582	1.12389
0.97959	0.97744	0.79724	0.71933	0.8154	1.25919	1.04267	1.07283	0.94538	0.57172	1.35632
1.41057	0.98025	1.02277	1.06623	1.10013	0.69779	0.87557	0.89645	0.91069	0.87034	1.36606
1.00248	0.73277	0.8899	1.10778	1.05463	1.17443	0.47286	0.61115	1.08871	0.72462	1.00253
1.00629	0.73179	1.23764	0.94175	0.77642	0.91673	0.85346	0.98694	0.68626	0.45895	1.29272
0.87756	0.76854	0.9854	0.8734	0.90468	1.13356	0.98793	0.86459	0.9498	0.83886	1.22311
1.01981	0.93733	0.8565	1.0358	1.09042	1.0766	0.74563	0.90813	0.73906	0.55393	1.15449
0.47448	0.80119	1.00364	0.54115	0.81559	1.14434	0.73206	0.73449	0.82879	0.65803	1.16311
0.96017	0.89627	1.13262	0.84741	1.06493	1.25436	0.75517	0.56124	1.08181	0.87435	1.25111
1.09926	1.09142	1.14187	0.98485	1.05058	1.04777	0.85052	0.99253	0.58584	0.51121	1.12921
1.02631	0.76892	1.0883	0.89551	0.96298	1.15088	0.81365	0.7562	0.94186	0.84751	1.23342
0.82212	0.77283	1.14593	1.05014	0.81631	1.6105	0.82082	0.42667	0.72848	0.70795	1.31646
0.98349	1.10203	1.03711	1.00167	1.12687	1.20751	0.86679	0.84686	0.93718	0.71795	1.30199
1.13552	0.88853	0.87749	1.07119	0.98436	0.84551	0.85819	0.6881	0.92604	0.88534	1.14839
0.99749	0.91875	1.02989	0.77309	0.96158	0.88376	0.71549	0.88672	0.84465	1.45777	1.06715
0.66554	1.05473	1.13461	0.87949	0.88982	1.15466	0.69583	0.91288	0.87226	0.95051	0.98851
1.06531	0.76806	1.03693	0.88256	0.92616	0.94171	0.74064	1.10388	0.94332	0.56772	0.95375
1.03128	0.86638	0.77386	1.03861	1.0115	0.87498	0.84898	0.91106	0.87565	1.04364	1.31488
0.88168	1.02168	0.98236	0.90913	0.93857	1.13381	1.11783	0.82471	0.8687	0.70292	1.1339
0.91383	1.04296	0.92611	1.17343	1.04559	1.09236	0.88673	0.61054	0.90234	0.47169	1.09467
1.04838	0.82657	1.07157	0.80989	0.94959	1.18751	0.86729	0.87033	0.48972	0.76774	1.02661
0.94682	1.05481	1.27258	1.15897	1.11832	1.04646	0.6608	1.14747	1.04332	0.52567	0.99508
0.67796	0.82855	0.92363	1.02681	0.92675	1.09485	0.96315	0.66029	0.56253	0.73024	1.38363
0.96914	0.83189	0.92205	0.83997	1.03421	0.79194	0.97287	0.6098	0.71684	0.66338	0.98167
1.37032	0.98204	0.92024	1.02705	0.98548	1.20751	0.94593	0.66293	0.86876	0.22465	1.18011
0.78857	1.04199	0.99161	1.03364	0.89047	0.928	0.93576	0.87016	0.81762	0.81457	1.15321
1.11655	0.87374	1.02247	1.16222	0.96012	1.12168	0.96203	0.54709	1.0971	0.82665	1.20653
0.90315	0.95506	1.11247	0.75809	1.00396	1.12719	0.77585	1.05032	0.81807	0.75784	1.24169
0.8693	0.87916	0.57063	1.09576	0.69891	1.20313	0.67528	0.92824	1.00969	0.592	1.32687
1.07009	0.89954	0.64278	0.91364	0.97394	1.11883	0.78432	1.06941	0.7014	0.66211	1.58154
0.92917	0.81644	0.35495	1.02098	1.02015	2.12219	0.60257	0.95757	0.92564	0.60497	0.65953
1.16809	0.99782	0.99279	1.06504	0.74823	1.18937	0.53288	0.66057	0.77161	0.98064	1.3275
1.13812	0.9058	1.06645	0.73702	0.83438	0.87061	0.88657	1.06361	0.99589	0.74685	0.2624
1.28277	1.09128	2.15533	0.979	1.02268	1.19589	0.89933	0.90895	0.81685	0.66432	1.38745
0.9929	1.11854	0.86977	1.4077	1.02166	0.89603	0.90733	1.04435	0.95747	0.65856	1.0846
0.67637	0.79221	1.10215	0.91079	0.8401	1.22093	0.57394	0.78368	0.74984	0.89604	1.42417
1.09962	1.01275	1.16648	1.19435	0.99937	1.3081	0.61373	1.07789	0.66227	0.87671	1.37577
0.84484	0.77397	1.12511	1.04334	0.92588	1.08526	1.04854	0.67032	0.69865	1.15256	1.3072
1.02986	0.61982	1.11293	1.24966	0.84174	0.84275	0.97497	1.14257	1.25068	0.83811	0.90744
1.17295	1.02285	1.01845	0.8709	1.00944	0.97742	0.69826	0.67363	0.96055	0.74865	1.32737
1.14565	1.02658	1.69791	1.06714	0.96886	1.12525	0.92919	0.78735	1.13559	0.77112	1.95051
1.03555	0.91469	0.95602	0.97381	0.6775	1.06719	0.82916	0.75126	0.96569	0.42529	1.14787
0.9651	1.00917	2.27426	1.08164	1.03861	0.95834	0.81177	0.97182	0.64191	0.93196	1.22504
0.92994	0.96802	0.9389	0.9207	0.97993	0.97219	0.53922	0.86147	0.90519	0.72291	0.96078
0.88161	0.92598	0.90258	0.67778	0.97544	0.64931	1.18288	0.68779	0.77555	0.58257	0.98017
1.19761	0.99481	1.04551	0.89767	0.79178	0.48295	0.80217	0.70778	0.87792	1.09857	0.76092
0.89268	0.95124	0.77966	0.91167	0.77045	2.85942	0.95547	1.02442	0.75289	0.59563	2.29077
1.07891	0.86571	1.02577	1.09447	1.0499	1.08343	0.90341	0.92255	0.47719	0.54252	1.23727
0.75241	0.83537	1.09967	0.90694	0.8919	0.4914	1.00842	0.89398	0.8505	0.67131	1.12017
1.02042	0.98686	1.11834	1.11335	1.02487	0.87601	0.53184	0.95903	0.96413	0.91819	0.89061
0.88086	0.80624	1.18293	0.97129	0.97776	0.70507	0.81582	0.88872	0.565	0.72042	1.14315
1.05296	1.25572	1.07023	1.28593	1.0688	1.02002	0.69026	1.00955	0.57017	0.545	1.13916
0.69572	1.05533	1.07676	1.15693	0.94059	1.10459	0.84431	1.07674	0.9397	0.90888	1.29691
1.0905	0.84103	1.00914	0.93086	0.8951	1.09566	0.49148	0.67715	1.05619	0.76879	1.05452
1.07017	0.99561	1.05727	0.7214	0.99293	1.1848	1.05309	0.7834	1.0242	0.94473	1.11628
0.98307	1.0442	1.29842	0.9921	0.75877	0.86894	1.06379	1.03201	1.04847	0.59802	1.04877
0.90037	0.98408	1.00171	0.75711	0.65846	1.00727	0.67337	0.63667	0.78411	0.8984	1.56237
0.94262	0.87557	1.28399	0.6592	1.02702	0.69957	0.74117	0.93206	0.88586	1.71476	2.09423
1.0009	0.75505	0.92051	0.75028	1.12396	1.26839	0.89457	0.6566	0.89502	1.38058	1.08924
1.29526	0.8419	0.96787	0.853	1.11397	0.86113	0.8025	0.3661	0.92169	0.58049	1.14829
1.03551	0.91622	0.90834	1.02356	0.93354	1.80719	0.98987	0.99126	0.87755	0.73418	1.49067
0.8377	0.88964	0.95353	1.028	0.7951	1.15098	0.95557	0.76334	0.91753	0.35639	0.73045
0.90038	0.70943	1.08458	1.01275	0.779	1.0313	0.54261	1.08248	1.03724	0.64752	0.78759
1.18778	0.88079	1.52403	0.93516	0.96855	0.96048	0.91498	0.62919	0.97746	0.74462	1.27241
1.06934	0.87492	1.37629	0.97557	1.03374	1.0095	0.94543	0.67935	0.85739	0.72121	0.81702
0.95993	0.88851	1.01943	1.26352	0.95324	0.89101	0.91799	0.90828	0.78933	0.7018	0.93885
1.00758	0.77811	1.07626	1.22264	0.93294	1.10601	0.89007	0.54405	0.77516	0.55963	0.76205
0.88898	1.20285	1.07313	1.01541	0.9568	1.56096	0.76423	0.93892	1.07619	0.7438	1.20683
1.07365	0.95096	1.20392	0.95755	0.61403	0.80022	0.84635	1.225	1.22443	0.90387	1.36953
0.72641	0.96096	1.06833	1.09053	1.18943	0.57863	0.84581	0.76414	0.82122	0.72883	1.49104
1.05355	0.83624	1.13018	1.06783	0.91649	1.11279	0.62675	1.00348	1.01901	0.6657	1.05192
0.99292	1.01059	1.16736	0.96062	1.07088	0.71389	1.2369	0.90091	0.79888	0.92097	1.30037
0.87296	0.99877	1.01182	0.60837	0.69143	1.08441	0.79482	0.71592	0.69717	0.50124	1.1264
0.84599	1.08721	1.64827	1.06278	0.68177	1.13492	0.98715	0.75786	0.80939	0.77278	0.99966
0.87045	0.89712	1.13297	0.8164	0.91604	1.08018	0.81881	0.93128	0.84867	0.91943	1.14989
0.94577	0.98616	1.25273	0.98547	0.91573	0.7945	0.99358	0.84031	0.53465	0.93421	1.30628
0.83529	1.20515	1.14982	1.10362	0.93632	1.07261	0.71116	0.88738	0.97823	1.20999	1.23815
0.98981	1.05198	1.06997	1.1368	0.91359	1.06181	0.73201	1.08203	0.9609	0.84798	1.02636
0.996	0.77174	1.10804	1.03052	0.9092	0.97527	0.42529	1.068	0.84751	0.6787	1.13723
1.1071	0.94775	1.10972	0.99672	1.02475	1.1403	0.68685	1.13916	0.43693	0.79978	1.18223
0.9311	1.02036	0.88537	0.8294	1.10262	1.04245	0.81823	0.83089	0.95176	0.82134	1.23046
1.02003	1.02894	1.05959	1.09639	1.03118	1.15569	0.77485	0.8866	1.00714	0.33062	0.87049
1.08378	0.83469	1.98613	1.04077	0.90256	1.15028	0.5742	0.90194	0.8094	0.76717	1.11799
0.45668	1.0473	0.89877	0.89469	1.03489	0.78276	0.49877	0.77417	0.86342	0.70924	1.06335
1.03168	0.76555	1.24658	0.82054	1.04793	0.90513	0.7616	1.18091	0.69092	1.13744	1.21681
1.06892	0.99577	0.87825	0.89807	1.03639	1.08334	0.78995	0.9998	1.13734	0.75894	1.26481
0.95202	0.77593	1.04883	1.13236	1.03288	1.04808	0.6652	0.83688	0.92391	0.20185	0.99642
1.11002	0.72656	0.39449	1.2373	0.85737	0.77653	0.77302	1.03887	1.02479	0.82126	2.44554
0.99611	0.72719	0.92178	0.90999	1.10036	1.14849	0.84424	0.78382	1.00107	0.91059	1.11047
0.85237	0.93396	0.97159	0.93581	1.00725	0.71688	0.68772	1.25017	0.94585	0.80288	1.24268
0.62081	0.8475	1.14953	1.11452	1.06671	1.13485	0.97115	0.94465	0.77771	0.74094	1.10274
1.1473	0.86225	1.12928	1.01145	0.9664	0.8781	0.88517	0.92948	0.50462	0.81115	1.45188
0.7921	1.02852	1.18316	1.16949	0.90968	1.26728	0.659	0.94407	0.92194	0.52309	0.91548
1.06826	1.01544	1.1698	0.98551	0.80572	0.82266	0.47698	0.88013	0.91347	0.84867	1.03004
1.12286	0.82824	0.96903	1.05383	0.71292	1.04755	1.18296	1.37679	0.83291	0.74783	1.19355
0.88016	1.00791	1.02428	0.69687	1.09379	0.69955	0.7749	0.91215	0.76922	0.84398	1.03431
1.02057	0.93775	1.02274	1.03244	1.13551	1.03239	0.88009	1.12932	0.77441	0.67212	1.30379
0.90703	0.73924	0.96659	0.60928	0.77586	1.72256	0.99379	0.70744	0.71792	1.20315	1.07834
1.04898	0.92513	0.87404	1.09509	0.91191	1.04206	0.74551	0.62773	0.95526	0.9553	1.03055
1.008	0.82221	1.08178	0.8438	0.65252	1.04529	0.80877	1.12131	0.72052	0.85525	1.05461
0.91477	0.86269	1.11954	1.12923	1.00294	0.99825	0.63485	0.9354	0.48297	0.71822	1.24628
0.93052	0.94125	1.02422	1.22274	0.93535	1.01934	0.69004	0.90697	0.71567	1.06465	1.23594
0.92325	0.98525	1.48753	1.11968	0.9297	1.07729	0.57355	1.04594	0.82293	0.48701	0.92432
0.93259	0.98522	1.07099	0.91401	0.89169	0.79105	0.85877	1.10831	1.75487	0.73148	0.87255
1.15168	0.74983	0.57313	0.72738	0.73673	0.92409	0.62209	0.54972	0.86322	0.889	1.40018
0.96785	0.99494	1.72436	0.7103	0.87132	1.32742	0.76415	1.04217	0.38842	0.63025	1.39597
0.50205	0.99954	0.98051	0.94236	0.99064	0.93275	0.92832	0.70547	0.9554	0.72026	0.59382
0.96771	0.90635	1.1058	1.00809	0.94363	1.04734	0.80054	1.10594	0.85153	0.98915	0.87193
1.07568	1.04066	0.91125	0.93969	0.87639	1.15729	0.97074	0.87995	0.89776	0.81335	1.13654
1.52331	0.88057	1.02387	0.86929	0.77763	0.92521	0.81203	0.80516	0.85665	0.54901	1.23143
1.14781	0.83972	1.84853	0.77024	0.86361	1.18825	0.98931	0.97554	1.01641	1.13111	1.05181
1.07683	0.76767	1.23952	0.91734	0.88567	1.14713	0.91421	0.97477	0.95193	0.98003	1.33432
0.88661	0.93242	1.09338	0.85395	1.04086	1.1791	0.82229	0.97211	0.98915	0.81663	1.22913
0.99266	0.93961	1.0349	0.79904	0.77822	0.75204	0.8449	0.56932	0.9475	0.7208	1.29205
0.83553	0.67678	1.0348	1.04218	0.83459	1.17439	0.92468	1.01368	0.57082	0.80884	0.97173
1.09945	0.9269	1.0122	0.27822	0.70718	1.00386	1.03107	0.9522	0.64952	0.69794	1.17208
0.98302	0.81444	1.1307	0.67147	0.95975	0.96284	0.77706	1.16731	0.74683	0.82802	0.99836
0.74493	0.80826	1.06047	0.84745	0.98324	1.00755	1.10004	0.32084	0.99671	1.06535	1.08804
1.97016	0.82318	1.05925	0.98661	0.95264	1.12896	0.78708	0.91791	0.93503	0.87638	1.3277
1.03755	0.84586	1.2163	0.8945	0.78588	4.29277	0.87131	0.88526	0.98565	0.826	0.79197
1.02257	0.98907	0.91006	0.86643	1.02991	1.17996	0.76997	0.8103	1.21209	1.22683	0.71467
1.06295	1.07331	1.02927	0.99977	0.76673	1.09272	0.82117	1.02765	1.00665	0.66041	1.05012
1.12882	1.04081	0.9451	0.97329	1.124	0.72005	0.73635	0.98703	0.93077	1.00483	0.58822
1.09208	0.96176	1.08811	1.11566	0.71397	1.05523	0.79206	0.9453	1.09567	0.27662	1.16416
0.96172	0.73758	0.99407	0.87925	0.90126	1.17711	0.87728	1.19748	0.74657	0.97328	1.28582
1.23951	0.51917	1.47942	1.026	0.95784	1.11799	0.94476	0.88038	0.79128	0.85634	1.09262
0.68582	0.81275	0.32387	0.78473	1.13857	1.20568	0.96727	0.67897	0.99575	0.77823	1.31169
1.1177	0.55981	3.25302	0.97748	0.91225	0.7884	0.76959	0.96347	0.88405	0.55839	0.85219
0.89643	0.94922	0.60366	1.2935	0.79383	0.98204	0.93904	1.15812	0.92737	0.9459	1.33028
0.95604	0.78037	0.76444	1.19252	0.80443	1.17056	1.06766	0.73008	2.57615	1.00447	1.25137
1.28485	0.92334	1.09795	0.82372	0.88621	1.18729	0.93582	0.93281	0.94687	0.81725	1.11561
1.09472	0.90143	1.0405	0.92459	0.86687	0.97247	1.01217	1.42775	0.83102	0.52779	1.10698
1.0241	0.99018	0.61609	0.87687	1.09172	1.22028	0.90542	0.96134	0.90996	0.72739	2.09276
0.72327	0.84364	2.36668	1.09623	0.90155	1.10054	0.91563	0.73511	0.82484	1.02612	0.81716
0.86856	0.90398	2.49616	0.88862	0.96622	0.96399	0.91178	0.97631	0.99881	0.71641	1.2552
0.90836	0.88626	1.06091	0.64549	0.9263	0.88096	1.00043	0.89291	2.38855	0.5921	1.33193
0.78703	0.62062	1.16394	0.95809	0.93176	0.60392	0.98545	0.51915	0.95408	2.2611	1.31517
0.991	0.93371	1.10475	3.30194	1.01485	0.91537	0.95225	1.09095	0.60989	0.90802	1.10708
1.02653	0.61793	0.86206	0.9931	0.88773	1.09466	0.80511	0.9632	0.71183	0.85809	1.06092
1.03377	0.95608	0.85034	1.10654	0.97765	0.88258	0.89582	0.89955	0.8321	0.69867	0.91479
1.04628	0.99026	1.1059	0.68228	1.04272	1.2609	0.7903	0.88283	1.12184	0.89793	0.58539
1.10695	0.88219	1.03984	0.78347	1.01761	1.11535	0.61857	0.88974	0.89238	0.74971	0.8763
1.25224	1.02294	0.93728	1.01353	0.83115	1.24594	0.56045	0.86796	0.85653	0.62133	1.24753
0.66956	1.07806	1.10306	0.93307	0.78806	1.13354	0.89401	0.88737	0.90582	0.68209	1.38491
0.95267	1.06079	1.06573	0.90112	1.0808	0.99927	0.78004	1.15501	0.77621	0.649	0.99348
0.65145	0.92215	1.00405	1.22078	0.97867	1.30671	0.97543	0.89587	0.9467	0.64343	0.98747
1.04622	0.97629	0.97835	0.79615	0.94171	1.06642	0.90884	0.99855	0.48697	0.76149	1.07727
0.93968	0.98705	0.9776	0.83483	0.9	1.22818	0.77273	0.56731	1.20285	0.83321	1.14802
1.14839	1.02	1.2433	1.20882	0.96613	1.16602	0.90628	1.01386	0.62102	0.64043	0.99011
1.19126	0.9883	1.15526	0.82061	0.56768	1.05308	0.8741	0.51711	0.82177	1.07925	1.27683
1.01714	1.03918	1.0266	1.00472	0.90134	1.18188	0.6541	0.38921	0.88842	0.78321	2.50642
0.78918	0.91862	1.01083	0.9305	0.58668	0.83864	0.93966	1.01753	0.74307	0.60813	0.84303
1.06706	1.01511	1.63423	0.73063	0.86478	0.99002	0.82707	0.88902	1.01811	0.58779	1.10232
0.9627	0.59831	0.99353	0.88337	1.0122	1.0583	0.90044	0.54144	0.84147	0.8176	1.0174
1.13545	0.83287	1.1177	0.93516	0.96902	0.81418	0.66825	0.94834	0.54223	0.43424	0.85547
0.99361	0.4831	0.82884	1.03846	0.86987	0.86318	0.81498	0.85788	1.19039	0.53711	1.09434
0.86602	0.89157	1.01128	0.93861	0.89218	0.28227	1.00791	1.03399	1.17491	0.91605	0.96175
0.54956	0.76827	0.89626	1.18517	1.05429	1.02982	0.73011	0.82043	0.6664	0.85126	1.31268
1.04077	0.67896	1.11208	0.95352	0.87616	1.16584	0.89453	0.99041	0.92117	0.56778	1.30826
0.86641	0.86207	1.05455	1.00123	1.09367	0.68581	0.94916	0.64769	0.69487	0.46345	1.06305
1.07077	0.56675	0.89086	1.13492	0.6701	0.99034	0.75426	0.99667	0.77514	0.64633	1.04462
1.13902	0.88684	0.89525	0.72085	0.57917	1.01763	0.87481	0.99279	0.71956	0.88836	1.03563
0.91698	0.92301	1.07105	0.92583	0.99496	0.67611	0.62306	1.10162	0.8514	2.14866	1.28709
1.01015	0.83473	1.50477	0.72067	1.13312	2.42565	1.00797	0.38792	0.82722	0.70599	0.98316
0.81715	0.75333	1.26856	1.03561	0.72226	1.15865	0.81787	0.97701	0.84698	0.70925	0.88503
0.96712	0.98346	0.95368	1.24065	1.01783	1.21085	0.6362	0.94999	0.92525	0.90032	1.19364
0.87564	0.79538	1.0113	0.43624	0.8692	0.5288	0.86112	0.90714	0.66993	0.74811	0.82172
1.08935	0.87003	0.96737	1.01518	0.65591	1.09956	0.80001	0.77444	0.36468	0.70813	1.26591
1.264	0.86266	0.99587	0.93669	0.81778	1.21575	0.86437	0.76898	0.67843	0.61159	1.06926
1.08182	0.97306	1.15481	0.81588	0.87213	0.98534	0.80544	0.6679	0.7317	0.71321	1.12927
0.96145	1.04006	0.9079	0.92603	0.87957	1.0243	0.5742	0.79995	0.71836	0.73481	1.24746
0.65048	0.85046	0.66735	0.75678	0.91442	0.88564	0.99544	1.00015	1.02734	0.58891	0.82397
0.9982	1.06242	1.08349	1.12358	0.84921	1.18628	1.11562	0.95066	0.52029	0.9198	1.16265
0.78477	0.88609	1.093	1.03277	0.84611	0.99701	0.86925	0.69256	0.90339	0.6256	1.27226
0.66644	0.79446	1.03419	0.94756	1.78352	1.09837	0.69585	1.29816	0.61617	0.33747	0.90127
1.12033	0.86805	1.15897	1.00849	0.95759	1.15011	0.81864	0.86101	0.60009	0.61067	1.24456
1.0881	0.89167	1.00303	1.02386	0.77378	1.15994	0.95681	0.92218	0.38985	0.7449	0.8089
1.14602	0.93475	1.1524	0.87176	0.79312	0.85917	0.81303	0.79386	0.88314	0.50548	1.28174
1.00596	0.78206	0.97872	1.34656	0.92661	1.19352	0.94256	0.94507	0.65015	0.85663	1.55067
0.93473	0.73211	1.12438	1.21424	0.72271	1.25926	0.76418	0.6316	1.36135	1.0026	1.55349
1.09688	0.90584	1.10574	1.00094	0.83452	0.70979	0.81241	0.78914	0.7799	0.84145	0.73861
1.06015	0.86058	1.04729	1.11284	1.05527	1.05328	0.77749	0.50492	0.80023	0.54596	1.18664
1.01359	0.75499	1.09974	0.88184	0.62724	0.98536	0.9675	1.05994	0.45475	0.74223	1.13692
1.07203	0.75388	0.98147	0.84952	0.89468	0.74854	1.0167	1.04009	0.9918	1.17795	1.30925
0.662	0.95537	1.08109	0.85841	1.0928	0.74273	0.86205	0.32476	0.82182	0.88119	0.86901
0.99313	0.96611	1.01544	0.64393	1.10092	1.04261	0.94856	0.71052	0.56844	0.80271	1.42358
1.10572	0.61755	1.07717	0.55999	0.88534	1.10755	0.80143	1.05881	0.69501	0.69459	1.25809
1.01643	0.96308	0.77711	0.98532	0.99118	2.23104	0.84301	0.65382	0.78065	1.26913	1.14277
0.64124	0.44771	0.97042	0.72279	1.31911	1.13829	0.64636	0.9098	0.63437	0.58008	1.50539
0.96904	0.94707	0.97265	0.97811	0.83944	1.0091	0.8548	0.97699	0.68079	0.77664	1.72838
0.98354	0.66048	0.97165	0.93799	0.91613	1.05802	1.26823	0.58822	0.91656	0.74025	0.99715
1.12471	0.99649	1.09238	0.86028	0.62694	0.76782	0.69071	0.6145	0.41051	0.89007	1.25462
1.05447	0.90907	0.97889	1.0387	1.17222	0.92662	0.80195	0.98317	0.94162	0.78441	1.33294
1.24668	0.6331	0.65055	0.90964	0.55011	1.08556	0.55553	1.08704	0.44283	0.18676	1.43557
1.09103	0.82785	0.98848	0.63846	1.11767	1.16619	0.73638	0.88113	1.00662	0.88105	1.2264
1.19287	0.85189	0.94015	1.00598	0.99936	1.10112	0.77619	0.91092	0.61589	0.90459	1.12376
1.07705	0.80976	1.0621	0.80461	0.97689	1.30391	0.84913	0.80704	0.81608	0.91031	1.4969
0.92426	0.86887	0.89295	0.98656	0.67375	1.19061	0.55167	1.01311	0.85618	0.96941	1.37663
1.07577	0.86421	1.03783	0.85924	0.69678	1.13326	0.99631	0.83237	0.98737	0.64483	0.63116
1.35874	1.03571	0.87517	0.89258	1.01197	0.93788	0.74574	0.85923	0.76394	0.72786	0.95598
0.83208	0.93448	1.15157	0.98921	1.15003	1.06476	0.98328	0.76694	0.87556	0.60472	1.04507
1.0553	0.76824	1.12243	1.16781	1.10675	1.18187	0.76545	0.97327	0.98732	0.78257	0.6222
0.82261	0.93717	0.96093	0.90404	0.8571	1.46818	0.78542	0.79205	0.93466	0.66576	1.2111
0.89347	0.91704	1.13206	0.93262	1.07343	1.14726	0.91665	0.65046	0.79969	0.57959	0.98518
1.195	0.90661	1.06162	1.00958	1.03311	1.09162	0.68335	0.73415	0.83846	1.04563	1.32036
0.90629	0.9013	1.25156	0.89184	0.9556	0.92955	0.32769	1.05301	1.00819	0.97742	1.0077
1.05802	0.99335	0.9791	0.7425	0.67859	0.81725	0.93236	1.12144	1.18506	1.10235	1.00157
1.09235	0.96667	0.95566	0.48042	0.70992	1.18774	0.78502	0.81652	1.11871	0.8431	1.3864
0.81368	0.65627	0.98995	1.09341	0.92507	0.77382	1.03927	1.18772	0.77567	0.64848	0.54027
1.04405	0.96684	1.04468	0.92731	0.98963	1.03725	0.83012	1.04995	0.80179	0.91754	1.13371
1.14867	0.91678	1.15995	0.91463	0.81489	1.07302	0.80354	0.82429	0.87749	0.52593	1.21733
0.95249	1.06315	1.15955	1.10037	0.9618	0.60542	1.60765	0.972	0.8866	0.39329	1.20202
0.88333	0.77099	0.92584	0.86292	1.05552	0.5546	0.85362	0.8174	0.88852	0.76077	1.16898
0.88326	0.84525	1.1922	0.69949	1.01218	1.12901	0.88595	0.71476	0.82087	1.08308	0.63586
0.79736	0.64814	1.2233	0.92127	1.02347	1.11643	0.7011	1.00179	0.88208	0.84487	0.97869
1.21574	0.99374	1.02798	1.23294	0.52734	0.92026	0.88859	0.93231	0.9026	0.69647	1.47628
1.09833	0.83278	0.57838	1.05597	0.99643	1.36801	0.89944	0.96561	0.94992	0.75424	0.96726
1.00302	0.738	0.95056	0.85756	1.035	1.2471	0.56846	0.84661	1.02223	0.66006	0.67187
1.05697	0.83686	1.13697	0.89735	1.11094	0.88975	0.95246	0.80619	0.95055	0.47118	0.85771
1.1625	0.99888	0.97179	0.94707	0.93084	1.0729	0.76033	0.88819	0.60673	0.65896	0.67835
0.71892	0.91052	0.84599	0.96847	1.18728	0.75627	0.84641	0.88385	0.89963	0.70076	1.35792
1.1347	0.76827	1.15054	1.13382	0.74255	0.62919	0.78628	0.95306	0.73933	0.83611	1.16744
1.02997	1.14818	0.90351	1.19124	1.14311	1.08129	0.34502	0.99434	0.85327	0.88414	1.29419
0.30962	0.81171	0.98689	0.80652	0.9688	0.90691	0.76368	1.0435	1.0275	0.61337	1.11623
0.97229	0.69792	1.03159	1.35014	1.09536	1.0068	0.72962	0.91002	0.52167	0.98828	0.4182
1.09754	0.64171	0.32312	0.46541	0.80202	0.65716	0.91762	1.00972	0.77578	0.54107	0.86521
0.85065	0.97805	0.88631	0.93926	1.13407	1.06628	0.88446	0.97369	0.95977	0.65136	1.18069
1.14216	0.62185	1.01212	0.8698	0.64042	1.37317	0.7185	0.88504	1.10257	0.75948	1.06194
1.18256	0.72588	1.05557	0.99518	0.92846	1.14334	0.68282	0.88348	0.83886	0.65329	1.87096
0.74452	1.04997	0.84675	1.0441	0.80048	1.14632	0.91479	0.83958	0.78726	1.0266	0.95945
1.24107	0.70721	1.10846	0.92158	0.72511	0.98322	0.47626	0.79284	0.50517	0.80022	0.99082
0.98236	0.88799	0.97886	1.04497	1.08975	1.3299	0.7019	0.96744	0.50849	0.73887	1.215
0.86053	0.98505	1.09862	0.5128	1.29615	1.15934	0.87507	0.92129	0.83768	0.67806	0.7214
0.9176	0.99742	1.12236	0.79581	0.68278	1.09617	0.99957	0.81792	0.85925	0.54657	0.43787
1.00185	0.91177	1.03561	1.04228	0.68994	1.10435	0.97087	0.80453	0.84118	0.34424	0.43625
0.91898	1.08994	0.89631	0.92955	1.00372	1.04382	0.91813	0.79146	1.05289	0.83823	0.78302
0.88926	0.92589	0.69081	0.69235	1.00421	1.12895	1.00588	0.97425	1.00246	0.75445	1.28355
1.04872	0.89522	0.93919	0.88394	0.97127	1.01713	0.87745	0.67766	0.91775	0.7723	1.10125
0.99768	1.00502	0.97809	1.16757	0.51777	0.85139	0.846	0.88277	0.85088	0.32981	0.61373
1.16491	0.8826	0.80019	0.79333	1.20888	0.8815	0.90314	0.76571	0.6942	0.84499	1.2648
0.89236	0.89724	0.92422	1.04285	0.51732	1.64088	0.79186	1.02487	0.86035	0.64798	2.32174
0.90737	1.30486	0.99721	0.9527	0.94167	1.28393	0.89131	0.6332	0.59042	0.64891	1.85461
0.72469	0.94256	0.94638	0.99157	0.7968	0.97952	0.72448	3.30564	0.95839	0.81303	0.78152
1.27089	0.81962	1.02947	0.89352	0.98234	0.96149	0.44467	0.94092	1.18526	1.21853	0.80369
0.64388	0.74741	1.09437	0.89506	1.01744	1.02879	0.79026	0.95307	0.62235	0.60298	0.69264
1.02444	1.07769	0.99257	0.94427	1.10674	1.17812	0.49757	1.00167	0.71884	1.00007	1.00021
0.7805	0.47743	0.97174	1.1174	0.81219	1.13323	0.87584	0.8932	0.9408	0.98021	1.08482
0.98384	1.01665	1.01675	0.98514	1.04819	1.09756	0.98014	1.072	0.96189	1.15592	0.99929
0.71789	0.91703	0.94076	0.91296	0.88955	1.05988	0.46703	0.78812	0.94491	0.79389	0.91833
1.10469	0.89847	0.9987	0.95291	0.74304	0.85967	0.86892	0.52059	0.93043	0.74571	1.0708
0.66666	0.87134	1.04607	0.99586	0.97987	1.08837	0.91481	0.98456	1.07039	0.82111	1.17966
0.7188	0.72573	0.73269	1.03235	0.86239	0.82363	0.91277	0.87482	0.83136	0.80992	0.94236
0.22996	0.97974	0.97795	0.99611	0.60167	1.06474	0.29161	0.92652	0.96865	0.40375	0.92089
1.0173	0.78586	1.15879	0.42866	1.0051	1.18621	0.85232	0.9354	0.65598	0.78025	1.47731
1.03691	0.71568	1.1719	0.73513	1.11861	1.05868	0.81448	0.64523	0.93714	0.79692	0.9344
1.02375	1.00185	1.15677	0.60836	0.85154	1.06777	0.84478	1.25465	0.56395	0.75126	0.91521
1.1046	0.95932	1.12802	1.243	1.15847	1.09749	0.93076	0.82521	0.93452	0.8447	1.00427
1.06768	0.77676	1.5226	0.8891	1.0843	1.11961	0.84107	1.07227	0.72851	1.18411	1.08671
1.03679	1.26334	1.12866	0.95782	1.05867	0.95505	0.97398	0.77547	0.91544	0.84633	1.18335
0.69878	0.91866	1.1338	0.85137	1.13357	0.59073	0.86503	0.96716	0.7109	0.83169	1.38325
1.02936	0.78233	2.27084	1.05429	0.71492	1.13596	0.73636	0.80884	0.94284	0.72999	2.61692
1.19237	0.76114	0.89626	0.96036	1.17041	1.17261	0.38715	0.81209	0.8105	0.96338	1.06747
1.11584	0.98511	0.97257	0.96237	0.9992	0.84128	0.99822	0.79199	0.57416	0.6689	0.94849
0.70271	1.02374	1.07019	0.61144	1.00006	1.00541	0.63898	1.11027	0.92505	0.8052	1.25521
0.92833	0.96763	0.83986	0.8633	0.94775	1.15573	1.17407	0.97286	2.96617	0.76169	0.95326
1.20936	0.77328	1.00214	1.07495	0.96246	0.46797	1.41969	0.87895	0.58863	1.34293	1.10313
1.09412	0.91795	1.12019	1.0442	1.22646	1.01775	0.79962	1.11304	0.99863	0.30293	0.93845
0.78223	0.64495	0.98146	1.02947	1.02568	1.06277	1.01941	0.70565	0.84176	0.96716	0.90684
0.99231	0.89286	0.98641	1.69584	1.07693	1.03319	0.49939	0.88313	0.62944	0.54512	1.03498
1.06827	0.9359	0.8612	0.39671	0.89601	0.84942	0.93664	0.89798	1.17013	0.91055	1.25852
0.79404	0.85316	1.11383	1.02518	0.98832	1.14881	0.80257	1.54024	0.91164	0.86449	1.20884
1.02637	1.03585	1.10983	0.70574	0.9528	0.50291	0.95111	0.79865	1.03664	0.79167	1.11709
0.81641	0.497	1.21512	0.65308	1.05448	1.06778	0.75117	0.93112	0.99333	0.8381	0.81255
0.92635	1.03545	1.12034	0.88455	0.92699	1.02796	0.80284	1.04156	0.98924	0.61064	0.85594
1.07673	0.64459	1.14038	0.84904	0.82799	1.08179	0.68692	0.77138	1.16523	0.51478	0.91441
1.19542	0.84403	1.02872	0.80636	0.89691	1.05186	0.89297	0.80957	0.81515	0.59212	1.39692
0.67948	1.03332	1.09369	1.0303	0.82138	1.12591	0.8864	0.84681	0.61727	0.85804	1.23354
1.11114	0.85369	0.99995	1.05478	0.81421	1.15896	0.57084	0.7637	0.66036	0.89662	1.19535
0.85688	0.89519	1.02425	0.94696	0.70295	1.08872	0.86082	1.07944	0.98068	0.75343	1.15036
1.1105	1.04338	0.78091	0.93434	1.12318	0.89082	0.81442	4.56843	0.86065	0.63167	1.25792
1.00417	0.92182	1.10906	0.62553	1.13567	1.17296	0.67952	0.89892	0.93046	0.53411	1.35224
1.10149	0.87957	1.18765	0.64066	0.81544	1.03757	0.60374	1.12622	1.19327	0.69938	1.18616
0.96171	1.08286	1.14506	0.94076	1.03081	1.1987	0.73915	0.83171	1.06335	0.64205	1.06377
1.21215	0.93796	1.02376	1.04237	0.7341	0.84778	0.77828	0.92753	0.89869	0.86305	0.84625
0.65512	0.68389	1.01717	0.72714	1.04602	0.95456	0.76871	1.01447	0.86938	0.66139	1.07974
0.90968	1.07014	1.05777	0.82144	1.0836	1.08217	0.63986	0.75862	0.83911	0.80531	1.08639
1.03213	1.13526	0.91458	1.09226	0.825	1.01768	0.74644	0.82086	0.54409	0.70595	1.11048
0.9763	0.90785	1.23473	1.05094	0.94208	1.36592	0.71828	0.80021	0.93236	0.64513	1.1073
0.97577	0.99225	0.80906	1.24629	0.80206	1.02784	0.64022	0.8648	0.68028	1.13991	0.92556
1.14579	0.98511	1.10287	0.99026	0.9727	1.20478	0.92543	0.80227	0.76223	0.67351	1.79131
1.07291	0.90261	1.03281	1.15421	1.14457	1.07907	0.82427	0.90661	0.7911	0.66847	0.54053
0.63942	0.88156	1.05676	1.29128	1.07667	0.87402	0.88018	0.51014	1.11791	0.60851	0.98107
0.71072	0.72626	1.09848	0.97667	1.21954	1.11764	0.8704	0.54517	1.01898	0.81313	1.17376
1.13971	0.97145	0.94091	1.31492	1.02988	0.9664	0.68479	1.0586	0.72035	0.77482	0.54322
1.10711	0.85826	1.03565	0.91781	1.09865	1.09183	0.84031	0.23409	0.87499	0.92385	1.02139
0.99767	0.64666	0.74409	0.87082	0.61833	0.65068	0.38933	0.98024	0.92645	0.42116	1.19634
1.09978	0.83145	0.8527	0.98603	0.87207	1.23502	0.91159	0.99238	0.98499	0.95584	1.24277
1.17621	1.04784	1.08264	0.99421	0.6689	0.99482	0.72206	0.79919	0.53924	0.54409	1.22309
1.11206	0.88984	0.93671	0.64976	0.57841	1.32796	0.96541	0.898	0.93741	0.53149	0.97033
0.75985	0.86709	0.91461	0.95954	0.9348	1.20018	0.53225	0.59269	0.89364	0.69132	0.58694
0.66042	0.94957	0.93055	0.89091	0.94365	0.99574	0.90845	0.83088	0.81188	0.89119	1.10948
1.13109	0.79172	1.36818	0.9753	0.52378	0.903	0.98037	0.82585	1.16772	0.76949	1.17582
0.70212	1.20076	0.89881	0.90799	0.74417	1.29181	0.77175	0.90235	0.73916	0.64263	1.21653
0.99974	0.88468	0.73437	0.91726	1.03298	1.21816	0.6427	0.7622	0.8172	0.82525	1.29822
0.94286	0.89644	1.02197	0.99913	0.97764	1.16917	1.02918	0.613	0.61496	0.92557	1.22744
0.96709	0.931	1.05798	0.98097	0.86761	1.07613	0.72153	0.97225	0.7748	0.44289	1.07165
0.95194	0.79349	1.19693	0.93617	0.97998	1.00666	1.11348	0.98346	0.69098	0.80218	0.99649
1.16257	0.90173	1.05582	0.66263	1.28864	1.09115	0.98622	1.02964	0.76833	0.48684	1.21703
1.06036	0.66549	1.05667	0.81879	0.90231	3.52574	0.76973	0.60749	0.72517	0.87279	1.22982
1.05493	0.86334	0.91566	0.7052	1.04271	1.08433	0.90908	0.96781	0.70177	0.56002	1.31957
1.12815	1.02486	1.06919	1.08602	1.09948	0.89939	1.01504	1.00592	1.00068	0.78472	1.04822
0.98013	0.95209	1.08904	0.86266	1.05857	1.10492	0.89556	0.69456	1.0659	0.80431	1.21156
1.03156	0.81358	0.85946	0.68661	0.88613	1.10166	0.98341	1.03787	0.77058	0.79705	1.25603
1.03783	0.93819	1.01455	0.97234	0.81838	0.93009	0.89098	0.81761	1.06827	0.80595	1.28093
1.10836	1.04706	0.90994	1.02238	1.14125	0.79434	0.73328	1.07096	1.73419	1.5038	1.04027
1.04593	1.02618	0.83552	0.95094	0.89946	0.84978	0.90222	1.04827	0.86852	1.32524	1.0144
0.98402	1.00779	1.09738	0.80492	0.94709	0.99084	0.86182	0.91718	0.84919	0.58209	1.143
0.9083	0.78138	1.00934	1.04031	0.9063	0.69265	0.93525	0.87168	0.84962	0.79297	1.05561
2.40436	0.99401	1.37097	0.56169	0.95478	1.74553	0.93132	0.8397	0.79864	0.86727	1.34618
1.03888	0.93854	0.93635	1.01318	1.02087	0.7326	0.94005	1.09502	0.89216	0.32495	1.15038
0.97742	1.33238	0.93633	1.02443	0.98622	0.87133	0.76451	1.1956	0.91318	0.94058	0.85811
1.12256	0.90596	0.91395	1.14518	0.64102	1.22915	0.78351	0.87691	0.84275	0.57159	0.79844
1.00317	0.70515	1.32932	1.08254	0.80849	1.12032	0.61008	0.78901	0.84171	0.54401	1.36769
0.91314	1.06848	1.0998	0.71467	1.07862	1.01176	0.93017	1.09269	1.09158	0.874	0.98312
0.69576	1.08412	1.03586	1.0458	0.75244	1.3633	1.03232	0.8701	0.61466	0.93197	1.05108
0.7394	0.82041	1.02507	0.84548	1.11518	0.81891	0.81198	0.54447	1.11505	0.67872	1.19606
1.04126	0.68049	1.06394	0.74944	1.04766	1.21337	0.51586	0.86227	1.0141	0.48622	0.66658
0.87379	1.08923	1.00308	1.09569	0.95582	1.70274	1.05112	1.12125	0.8686	0.37658	1.28452
0.99465	0.91826	1.10383	0.86661	0.55407	0.97781	0.69844	0.90583	0.75401	0.82889	1.16504
1.02899	0.71623	1.39517	1.06112	0.74303	0.69977	0.86665	0.8131	0.93263	0.98712	1.20009
0.73432	0.38359	0.88156	0.91042	1.06139	0.63731	1.04859	0.82753	0.44562	1.32884	1.40396
0.72916	0.87268	0.92566	0.96857	0.90568	1.14147	0.89443	0.81712	1.14463	0.66041	1.28239
0.9628	0.93646	1.03142	0.72568	0.93821	1.09789	0.88558	0.9405	0.36266	0.76219	0.85547
1.1224	0.99018	0.96822	0.983	1.10985	1.73718	0.70929	1.09322	0.8904	0.64031	0.94704
1.00313	1.20907	1.11802	1.06504	1.05261	0.53215	0.8907	0.9035	0.80394	0.87801	1.39837
0.95484	0.91169	0.99881	0.86525	0.84862	1.0635	0.58997	0.86811	0.89973	0.76544	1.16206
0.91915	1.02709	1.07945	0.98513	0.91537	0.65526	0.78039	0.9561	1.03466	0.77724	1.79496
0.99498	1.16572	1.01016	0.80083	0.90343	1.16673	0.68324	0.92127	1.05745	1.03209	1.30443
1.03798	0.95702	0.86881	1.04531	0.81682	0.817	0.81488	0.85707	0.56829	0.87168	1.08611
1.21577	0.98459	1.20881	0.97506	0.91153	1.14883	0.83379	0.62199	1.2041	0.90267	0.88232
0.79061	1.02625	0.9888	0.97856	0.81301	1.20465	0.66315	1.03748	0.78032	0.70901	0.88275
1.00569	0.82656	1.04531	1.01618	0.76143	0.78693	0.72799	0.97967	0.5396	0.69471	1.02943
0.92519	1.03057	0.9913	0.93377	1.10582	0.99363	1.04549	0.66172	0.97173	0.7459	1.05806
1.05415	0.77869	1.68465	0.77584	0.99072	1.18016	0.91352	0.98073	0.99734	0.77064	1.79589
1.313	0.78688	1.02246	0.8959	1.05863	0.93969	0.8344	0.74135	0.73519	0.85532	1.37799
1.32098	1.01575	1.09138	1.02674	1.00521	1.11088	0.77028	1.25407	0.66341	0.416	1.06822
1.14775	0.81829	1.08993	1.05719	1.09731	1.2775	0.87053	0.91597	0.75111	0.69318	0.58397
0.92739	0.93364	1.0801	0.96123	0.9389	0.7874	0.71078	1.10497	0.69797	0.78061	1.20318
0.94547	0.95295	1.05635	0.79568	0.79886	0.57362	0.75148	1.03739	0.45593	0.77068	1.2945
1.06365	0.92285	1.19398	1.00203	0.85363	1.24811	0.8493	1.03103	0.87057	0.47046	0.8567
1.20791	0.56795	1.02442	0.79731	1.03324	0.97411	0.90991	0.98282	0.87736	1.07339	1.2173
1.09595	0.849	1.00308	0.98237	0.90584	1.28015	0.76964	1.60639	0.95256	1.07548	1.23497
0.85449	0.92099	1.3332	0.79964	0.83274	1.07107	0.92665	0.95366	1.03804	0.50714	1.02475
1.04562	0.82361	0.95679	1.02605	1.03362	0.98557	0.90068	0.7538	0.90412	0.58786	1.29192
1.13179	0.69163	0.80999	1.174	1.3014	0.8867	0.93751	0.59033	1.85182	0.66095	1.29989
1.08085	0.75123	1.01476	1.07357	1.0626	1.05323	0.55777	0.84987	0.68248	1.0061	1.03993
0.99061	0.7087	2.18086	0.81961	1.06722	1.15777	0.76537	1.17987	0.65991	1.12786	1.1255
1.08083	0.92007	0.91527	1.13035	1.03187	1.0226	0.79592	0.89367	0.70611	0.39592	1.14439
0.83593	1.01013	1.3418	0.76269	1.14488	0.94092	0.88763	0.93696	0.61089	0.69233	0.94414
0.89136	1.00845	1.14564	0.88058	0.94112	0.96261	0.76511	0.89359	0.96396	0.37472	1.31037
0.9383	1.16777	1.13269	1.05099	1.03404	1.05131	0.87701	0.78156	0.87681	1.04649	1.00859
0.91508	0.86927	0.78523	1.27092	0.73242	1.06391	0.87193	1.12566	0.9519	0.85045	0.88607
1.06872	0.92466	1.02579	0.54472	0.75532	0.98931	0.86878	1.0463	0.76831	0.8128	0.70628
0.76011	0.79393	0.85164	1.05968	1.11021	0.99872	0.97397	0.97344	0.79627	0.66921	1.14596
1.13603	0.82859	0.73142	0.99855	0.96893	1.35317	0.79435	1.05695	1.03113	0.71933	1.22984
1.02019	0.95672	1.0008	0.77503	1.00365	0.73202	1.50639	0.89895	1.02677	0.73552	1.50364
1.09512	0.78562	1.13257	0.55499	0.8806	1.36595	0.77416	0.95922	0.82606	0.67539	0.98896
0.92894	0.46675	1.04401	1.29317	0.82649	0.92399	0.92256	0.8492	0.85649	1.09589	0.71932
0.95441	0.99563	1.15867	0.79176	1.19742	0.64747	0.99778	0.70032	1.07744	0.79315	0.93437
1.06947	0.85236	1.0479	0.63385	0.99191	1.06334	0.43904	0.89086	0.73957	0.90589	1.16575
0.96557	0.93628	1.03127	0.74237	0.75265	3.14921	0.84566	1.13434	1.03313	0.30231	1.50232
1.09972	0.89223	0.83783	1.00281	0.98103	1.08613	0.98873	1.04284	0.51444	0.51392	0.8462
0.70228	1.09578	1.10236	0.93764	0.97656	1.06918	0.62768	0.74633	0.87388	0.50533	1.73724
1.02735	0.80757	1.05827	1.04561	0.94789	0.94689	0.92658	0.80816	1.97725	0.98335	1.14479
0.91922	0.91661	0.9347	1.06886	1.04825	0.76489	0.94911	0.98677	0.71659	0.82744	0.97387
0.69858	0.98344	0.99315	0.97482	1.03705	1.01236	0.99251	0.88489	0.93971	0.69157	1.0537
0.64734	0.89736	1.18401	0.92737	0.96627	0.50453	0.93186	0.8509	0.90721	0.69543	2.02262
0.89883	0.95327	1.0776	1.04773	1.03689	1.03786	0.81596	0.49337	0.7172	0.25731	0.99953
1.08697	0.91529	0.98269	0.94921	0.81814	0.77876	0.7986	0.74043	0.83947	0.80318	1.19915
1.07624	0.79545	1.08814	0.59848	1.02062	1.19036	0.9883	0.91025	0.95499	0.38853	1.38008
0.98023	0.92342	1.04427	1.00859	1.12721	0.66612	0.91536	1.03475	1.07101	0.54954	1.13317
1.14695	0.91828	0.75597	1.00728	0.96736	2.67346	0.68481	0.95762	1.05301	0.55685	1.20206
1.16786	1.12964	1.09365	1.09139	0.94328	1.11545	0.67387	0.91817	0.51136	0.60748	1.33737
0.9202	0.86096	1.04454	0.85181	1.10144	1.09254	0.88243	0.80059	0.8407	0.78276	0.99979
1.19658	0.96447	1.03093	0.89084	1.07286	1.16386	0.5433	0.81329	0.58889	0.88372	1.31693
1.04884	0.95738	1.09235	0.99102	0.92521	0.98167	1.04449	0.77822	0.93516	0.88152	1.14835
0.95028	1.01483	1.05641	0.65822	0.73404	0.99587	0.94477	0.84408	0.94146	0.24934	1.34313
0.99398	0.90649	1.15596	1.02285	0.85157	0.93833	0.86527	0.90861	0.83041	0.51896	1.01
1.45308	0.92453	1.16462	0.65299	0.56395	0.98992	0.8596	0.74684	0.73429	0.61283	0.92938
1.15075	0.95163	0.98305	1.02516	0.7976	1.22099	0.94064	0.90003	0.87191	0.68426	1.22994
0.97696	0.79053	1.09683	0.6085	0.73989	1.15438	0.85446	0.97598	0.68495	0.65469	0.95381
0.77235	1.02431	0.92573	0.97832	0.71459	1.06906	0.767	1.15191	0.78374	0.48964	1.05192
0.95082	0.49614	1.09966	0.99726	1.02684	1.05315	0.79399	1.03085	0.87375	0.84828	0.9696
0.59029	0.95846	0.4705	0.98619	1.07303	1.07624	0.7295	0.26793	0.96178	0.91083	1.2618
0.71438	0.85312	1.01154	0.76435	0.55743	1.02456	0.8434	0.87647	0.74494	1.0125	1.01289
1.00735	1.03673	1.00561	0.71206	0.4899	2.21001	0.75797	1.08269	0.95484	0.73621	1.2339
1.06173	0.993	1.17008	0.863	1.06142	0.77333	0.70855	0.88803	1.11632	0.77877	1.11042
0.89528	1.07016	1.07112	0.69843	1.14179	1.06329	0.70358	0.43596	0.94269	0.69571	0.90996
1.13651	1.01294	1.06971	0.67932	0.84231	0.95293	0.65609	0.94936	0.9033	0.66527	1.27383
1.19374	0.82073	0.99823	1.16971	1.0032	0.89987	0.74776	1.05763	0.70833	1.28124	1.38213
1.13311	0.80631	1.3485	0.91498	0.91784	1.07399	0.91882	1.00858	0.73645	0.99613	1.20569
1.15363	1.05299	0.99018	0.8366	0.89346	1.05675	0.82254	0.91138	0.49726	0.66906	1.04546
1.14975	1.08996	1.04583	1.00484	0.54477	0.88349	0.90168	1.08417	0.46935	0.44588	0.71714
0.8835	0.9251	1.0045	1.04896	1.01426	1.53532	0.69444	0.65867	0.90915	0.57296	1.01595
1.08559	0.90734	1.04126	0.87354	0.73193	0.86948	0.75021	1.33279	0.61897	0.83809	1.10717
1.12118	0.98909	0.89109	1.01387	0.50116	1.17572	0.47504	1.15047	1.01799	0.62933	1.13698
1.11188	0.93355	0.90582	1.28091	0.88484	1.24221	0.88444	0.78279	0.93738	0.54127	0.99283
0.84283	0.95943	1.03727	0.97706	1.02347	1.13603	0.93406	1.0682	0.57249	0.79414	1.18011
1.09619	0.77701	1.10652	0.80756	0.99604	1.17856	0.95275	0.82805	0.83491	0.87975	0.94021
0.9375	1.02841	0.98545	0.96415	1.02326	1.25093	0.71112	0.4689	3.36929	0.73474	1.04841
0.9657	1.02013	1.04736	0.90584	0.90468	1.3263	0.39186	0.84318	0.96436	0.86967	1.15056
0.83071	1.09434	2.29795	1.19872	0.87234	0.79705	0.99665	0.56014	0.71702	0.83046	1.18758
0.79978	0.76391	1.12013	0.88471	0.9	1.15645	0.94942	1.03396	0.97823	0.78972	1.36537
1.15526	0.99005	1.04044	1.00801	0.99619	0.91644	0.7849	1.02124	1.01985	0.65319	0.83113
0.8915	0.84036	1.01683	1.02045	1.0602	0.95695	0.8221	0.95184	0.89463	0.58491	0.98643
0.63477	1.14898	1.07788	0.94304	0.87944	1.23136	0.7657	0.96955	1.04107	1.26569	1.02671
1.05929	0.88551	0.97343	0.8934	0.71751	1.03105	0.83496	0.62022	1.03937	0.86025	1.1988
1.11889	0.94427	0.79599	0.75634	0.81201	1.10661	0.92905	0.89316	0.80011	0.69841	1.16687
1.03998	0.84511	1.12033	0.99157	0.76792	1.15091	1.05105	0.88273	1.09803	0.27515	1.03556
0.76455	0.86669	1.01431	0.99952	1.12014	1.37047	0.6935	0.97647	1.57894	0.49872	0.98485
1.00035	0.9207	1.09548	1.08659	0.86641	0.70939	0.86756	0.90176	0.50693	0.83035	1.25246
0.91106	0.95804	1.0365	0.92664	0.99016	1.07837	0.99905	0.572	0.73806	0.9035	0.59737
0.80684	0.72425	1.0523	0.99646	0.9964	0.80112	0.81508	0.7713	0.39166	0.7352	1.12047
1.13092	0.91682	0.96439	1.1909	0.88478	1.01088	0.47843	0.85586	0.73996	0.65749	1.18911
1.28621	1.02003	1.14623	0.95458	0.7844	0.85516	0.8724	0.83661	0.4301	0.45632	1.34072
1.10393	0.87986	1.05368	0.91883	1.01053	0.96214	0.65413	0.90722	1.07166	0.76598	1.35299
1.07358	0.54538	1.10901	0.98665	0.94156	1.17159	0.75052	0.67933	0.67503	1.05117	1.6249
0.53383	1.01955	0.81358	0.97102	0.911	0.92311	0.71545	0.38913	0.78365	0.61211	1.14699
1.12121	0.57475	0.872	0.99854	1.18794	1.30943	0.52552	0.98286	0.88595	0.79742	1.11229
1.07875	0.58854	0.97484	0.74701	1.05588	1.11939	0.79484	0.57546	0.78337	0.65476	1.19908
0.94774	1.01712	1.26812	0.90078	0.32133	1.02518	0.68454	0.85883	0.86153	0.82279	1.28701
1.1313	0.8904	1.05786	0.82894	1.07098	0.97634	0.90401	0.67436	0.9276	0.64456	1.22834
0.93547	0.97279	0.8834	0.90821	0.99713	0.99577	0.88707	1.05125	0.82611	0.74157	1.25348
0.71608	0.92584	1.04671	0.84632	0.89233	0.94882	0.68405	0.95663	0.79013	0.68852	1.07317
0.49479	0.7986	1.05893	0.63302	0.84463	1.05307	0.64347	0.87914	0.69673	0.71674	1.04133
1.1084	0.89866	0.98869	1.06514	1.04217	0.9363	0.69361	0.89384	0.86041	0.9642	0.89612
1.05082	0.86416	1.19244	0.9155	0.99534	0.9819	0.74054	0.54046	0.71252	0.63132	0.92988
0.86583	0.93387	1.01332	0.86627	1.05957	1.1319	0.42184	0.86677	0.9664	0.23656	1.29187
1.03513	0.92066	1.17191	0.89778	0.90221	0.99396	0.98008	1.04426	0.9222	0.85738	0.95926
0.93487	0.88111	1.16658	1.04193	0.91403	0.95565	0.80026	0.6545	0.85838	0.99682	1.01846
0.80371	0.86911	1.08444	0.74811	0.72732	1.02533	1.02466	0.90731	0.65819	0.8079	1.324
1.05982	0.92417	0.96816	0.68572	0.63748	1.28752	0.80202	1.08252	0.84743	0.97112	1.06931
1.14573	0.82509	0.94105	0.98428	0.97847	1.05726	0.9467	0.85245	0.59259	1.22226	1.08519
1.02394	1.01789	0.86094	0.8793	0.57459	1.16929	0.67984	0.81193	0.93141	0.77232	1.08885
1.01244	0.84764	0.86141	0.87394	0.713	0.73366	0.76848	0.9504	0.99221	0.66214	1.03022
0.60867	0.96037	0.8791	0.84796	0.97904	0.92788	0.81946	1.25354	0.91403	0.61428	0.98646
1.33318	0.94798	1.00389	0.92661	0.97474	0.78636	1.04003	0.80736	0.8412	0.48462	1.33251
1.1244	0.39465	1.30065	0.8334	0.75273	0.97045	0.9762	0.97572	0.43819	0.73707	1.39099
0.58777	0.98398	0.81258	0.7588	1.29184	1.0976	0.81093	0.27526	1.045	0.86276	1.42379
1.08631	0.90119	0.6345	0.83968	0.93672	1.1102	0.71393	0.83328	0.86063	0.47048	1.23066
0.99749	0.91471	1.09456	1.0584	0.95089	0.91496	0.89142	0.98617	0.97105	0.78972	0.94634
0.97398	0.90585	1.02708	1.04554	0.77899	1.12362	0.62605	0.86447	0.9077	0.6631	0.85746
0.81342	0.92553	1.16369	1.00356	0.82859	1.36857	0.73317	1.22756	0.77047	0.7953	1.45858
0.94469	0.92871	1.15829	0.87082	0.90309	1.14375	0.78074	0.6246	0.70178	0.51417	1.01724
1.23666	0.78749	0.91569	0.88865	0.99915	1.07344	0.59617	0.66828	0.84114	0.84941	1.28744
0.95085	1.02721	1.11194	1.05831	1.1745	0.86297	0.64368	1.09821	0.76683	0.69105	1.18007
0.81649	0.88118	1.06501	0.75395	1.03108	0.80728	0.98569	0.89632	0.61272	0.91178	1.14339
1.00814	0.81104	0.9722	0.89341	0.93411	1.1914	0.51903	0.83855	0.82034	0.942	1.08823
1.06131	0.83683	1.19058	0.48908	1.3095	1.09592	0.61152	0.797	0.38561	0.93195	1.18323
0.92085	1.05825	1.14549	1.09147	1.08734	1.08515	0.90235	0.79015	0.60605	0.53093	0.90939
0.84607	1.02574	1.13731	1.14973	0.82455	1.01411	0.7789	0.82469	1.05657	0.7282	0.9736
0.76847	0.91504	1.07904	0.854	0.78196	1.41277	0.68179	0.67515	0.88249	0.51927	1.15213
1.02891	0.7851	1.11539	0.94777	1.13882	1.04836	0.94286	0.98849	0.95297	0.5137	1.33166
0.87433	0.75798	1.09532	0.81027	0.93761	1.02744	0.80803	0.77152	0.90645	0.83535	1.02722
0.89537	0.61318	1.03392	1.03299	1.03912	1.02174	0.57442	1.21484	0.85527	0.87009	1.75047
0.83965	1.15366	0.66131	0.82597	1.14637	0.94914	0.69349	1.03066	0.82497	0.92222	1.1367
1.07381	0.9085	1.15956	1.04621	0.94931	3.39742	0.79062	0.84446	1.43249	0.71656	1.19928
1.11301	0.98791	1.15447	0.90308	0.87891	1.36195	0.68498	1.01526	0.68433	0.65416	1.21187
1.26626	1.07426	1.76282	0.87543	0.98226	0.89408	0.84929	0.49327	0.99326	0.83458	0.94346
1.1063	0.91721	1.00155	0.97547	1.05269	1.2401	0.89509	0.77237	1.02978	1.15016	1.14677
1.10211	0.82255	1.03921	0.96466	1.00249	1.16292	0.79709	0.6542	0.95019	1.07618	1.2674
1.05903	0.9899	1.60373	0.74258	1.01166	0.51036	0.80228	1.14454	0.96194	0.73781	1.14201
0.674	0.81212	1.09321	1.08402	0.92246	1.04359	1.02862	0.97693	0.86155	0.60829	1.019
1.33916	0.65752	0.4846	1.09838	1.06318	1.17917	0.73674	0.91782	0.77291	0.50636	2.20326
1.09523	0.95886	0.92422	0.98175	1.0297	0.87951	0.82792	0.90988	0.94239	0.45284	1.52399
1.13588	1.00123	1.07252	0.88302	0.97325	0.82203	1.22787	0.92998	0.90706	0.64094	1.1451
1.08016	0.63781	0.98287	0.91034	0.66943	0.78378	0.70818	0.66357	1.14095	0.75065	1.10783
0.93785	0.74773	1.07904	0.85779	0.77362	2.38358	1.00737	0.62912	0.98848	0.84935	1.36545
0.60421	1.03534	1.15049	0.96121	1.0237	0.88117	0.97983	0.96224	0.78456	0.79819	1.12871
0.81554	1.00596	1.2026	1.20129	0.90575	0.82456	0.56863	1.35805	0.85413	0.84522	1.7988
1.14626	0.93836	0.41736	0.8379	0.96737	1.12463	0.96652	0.8394	0.80514	0.65131	1.30435
0.86964	0.91482	0.69575	0.79057	1.01321	0.93079	0.84768	0.98178	2.97969	0.82147	1.33582
0.98854	1.13391	0.80345	0.51844	0.96073	0.97085	0.59775	0.62195	0.8933	0.30021	1.14924
1.02859	0.74657	1.05881	0.99932	0.85448	0.95275	0.82419	0.99072	0.87007	0.36026	1.36218
1.01721	0.7924	1.18079	0.76553	1.0164	1.06062	0.85659	0.88134	0.98265	1.00563	2.21549
1.10744	0.88062	1.95987	1.10998	1.18987	1.03583	0.92074	1.12862	0.74113	1.32889	1.15947
0.68778	0.93127	1.20995	0.81582	0.80281	0.70483	0.74353	1.09092	0.8947	0.73578	1.29222
0.79128	0.75194	1.00476	1.06841	0.67096	1.18763	0.51483	0.86224	0.70105	0.84729	1.05062
1.08091	0.95207	1.19662	0.98251	0.87192	1.00807	0.82342	0.93929	0.85376	1.01897	1.65655
1.14094	0.87993	1.08341	1.09422	0.76776	1.12222	0.82853	0.91679	0.9204	0.42523	0.69846
0.60527	0.83788	1.06262	1.07103	1.00276	1.07191	0.85217	1.13547	0.62689	0.72471	1.23579
0.30421	0.92208	1.01577	1.13928	0.72895	0.84917	0.78763	0.77498	1.03819	0.4193	1.07475
1.22404	0.91592	0.98688	0.90958	0.95527	0.83953	0.60891	1.10117	3.32965	0.79379	1.76471
1.28861	0.58678	0.93507	1.11836	0.50553	0.59859	0.64643	0.67004	0.99181	0.91799	0.93695
1.18932	1.00673	1.04651	1.10847	0.83882	0.97324	0.75873	1.03169	0.89681	0.65207	1.33531
1.0114	0.49986	1.05559	0.85919	0.9013	1.00956	1.02364	0.94405	0.76389	0.79339	1.09076
0.81422	1.17402	1.05105	0.96441	0.90472	1.00309	0.65635	0.62912	0.95823	0.6342	1.26309
1.01958	0.88311	1.02256	0.86825	0.93437	0.82371	0.92603	0.93358	0.87143	0.45041	1.3082
1.30442	0.89447	1.1046	0.82782	0.93174	0.82171	0.64919	0.80602	0.88588	0.75399	0.73848
0.93943	0.97879	1.04381	0.95512	1.11255	1.00687	0.78943	1.24264	1.11101	0.34404	1.84158
1.05751	0.73255	1.4131	0.83022	0.99701	1.29894	0.44117	0.87601	0.68572	0.70072	1.27976
1.10454	1.02874	1.14821	1.04196	0.98683	0.80785	0.99582	0.89399	0.88594	0.85519	1.12003
0.84676	0.41173	1.0115	1.02145	0.55888	1.08788	1.26553	0.86684	1.027	0.77038	1.24766
1.20767	0.98385	1.05637	0.83765	1.08724	1.05237	0.71089	0.93501	0.9408	0.56412	1.35082
0.98141	0.84709	1.11714	0.84391	1.14489	1.19461	0.80433	0.76359	0.98406	0.59823	0.63887
1.07971	1.05446	1.05579	0.87971	1.0054	1.027	0.44701	0.8219	0.78812	1.09688	0.81947
1.05835	0.95385	1.0461	1.49514	0.77121	1.1106	0.93079	0.62228	0.96803	0.62051	1.10919
1.11386	0.80553	1.42949	1.03854	0.96203	0.91511	0.98646	0.79221	0.73522	0.85586	1.07959
0.80856	0.80826	0.94838	0.77108	1.10528	1.24532	0.86347	1.23186	0.6605	0.60877	0.81056
1.22717	1.03319	0.97664	0.95824	1.13079	0.94929	0.77599	0.41936	0.58803	0.75222	0.88821
0.82436	0.9207	1.19162	0.98336	1.12249	0.58718	0.83507	0.85727	1.48985	0.85154	0.9172
1.03847	1.04295	0.80757	1.02859	0.87436	0.95636	0.8788	0.75187	0.91914	0.33021	1.3672
1.13259	0.59357	1.4837	1.08983	0.9997	0.90135	0.91722	0.88346	0.8739	0.62409	1.39035
0.73902	0.94665	1.03724	0.98775	0.72996	0.73135	0.99527	0.87606	0.99903	0.76108	1.10145
0.69825	0.99299	1.02188	0.72301	0.87568	0.97769	0.84521	0.96849	0.91189	0.78191	0.45508
0.85903	0.96855	1.24001	0.94942	1.07099	0.96451	0.78762	0.98356	0.99778	1.00513	1.05544
1.14039	0.62617	1.0718	0.90373	1.15979	0.91639	0.70766	0.7131	0.8232	0.71852	1.23336
1.03583	0.64661	1.13586	0.99823	0.87486	1.18469	0.87733	1.00185	0.75755	0.73374	1.22527
1.09961	0.8296	1.59896	1.04562	0.98228	1.05321	0.87763	0.95826	1.02689	0.88503	1.12609
1.29533	0.7719	0.88548	0.96133	0.99184	1.1216	0.64294	1.11461	1.07762	0.7777	1.30538
1.10092	1.12313	1.10789	0.90729	1.0961	1.13584	0.97151	0.95163	0.91329	0.64374	1.9253
1.44004	0.96794	1.07109	1.0245	1.10459	0.97464	1.01267	0.6055	0.91444	0.78411	1.1432
1.16445	1.03469	1.07757	0.85377	1.13093	0.99438	0.74042	0.81367	0.69066	0.4822	1.04135
0.9908	0.8939	1.07144	0.92713	0.86542	1.00498	0.88098	0.98896	1.01273	0.84439	0.85266
0.92648	0.83371	1.76204	0.95737	0.76403	1.02756	0.54521	0.8955	0.82401	0.62374	1.56153
1.42656	1.01598	0.87759	1.02324	0.91451	0.87857	0.87817	1.11868	0.93086	0.73085	0.94244
1.066	0.82752	1.21437	1.07877	0.97672	0.98866	0.90575	0.78129	0.79618	0.74123	1.08507
1.24942	0.68015	1.18802	0.95039	0.89045	1.11136	0.81773	0.71809	0.82024	0.56741	1.02545
0.89981	0.80783	0.75307	0.83739	1.02738	0.93853	0.6662	0.96996	1.00402	0.81292	1.11773
0.70437	0.9192	1.12579	1.07785	0.96703	1.34534	0.66808	0.88467	0.77188	0.91383	1.15779
0.74041	0.70732	1.00447	0.89985	1.08862	1.043	0.86578	0.93364	0.97742	0.46927	0.94575
0.94223	0.90495	1.00392	0.51929	0.9495	0.93285	0.6267	0.92747	0.9527	0.8138	1.35383
0.34755	0.77916	1.91201	0.97549	0.87099	0.78357	0.61444	0.72044	0.70328	0.79039	1.09911
0.54097	1.07312	0.23435	0.81451	1.12553	0.84222	0.88837	3.18758	1.08305	1.00208	1.35588
0.99504	0.55528	1.16973	1.03058	0.96134	0.79845	0.87043	0.8529	0.8168	0.9771	1.30342
1.06232	0.92884	1.27401	0.77531	1.02741	0.96039	0.86199	0.96303	0.79205	0.65929	1.38604
1.0105	0.90133	1.22486	0.94704	0.91514	1.04232	0.75317	0.83231	0.86791	0.82864	1.11836
1.03585	0.79002	1.06684	0.57754	1.12563	1.25208	0.74675	0.40533	1.03558	0.66616	1.04144
1.1115	0.88624	0.91338	1.03343	0.55044	0.7803	0.85732	0.58673	1.01598	0.61297	0.94919
1.02137	0.56187	0.94293	1.23185	0.64683	1.08136	0.98678	0.91652	0.79104	0.70153	1.12686
0.95124	1.10979	1.1062	1.1513	1.09939	0.88472	0.92479	0.79362	0.63455	0.64171	0.86149
1.04289	0.77206	1.09824	1.07106	0.85259	0.46734	0.89311	0.92673	0.94314	0.6925	0.81724
1.04398	1.11563	1.04803	1.31746	0.92852	0.80331	0.86186	0.93671	0.61047	0.47913	1.51716
1.01979	0.85081	0.88449	1.05437	0.85539	0.8084	1.10378	0.97217	0.85037	0.95727	1.05572
1.07221	0.62803	1.03312	0.9194	0.84688	0.92198	0.74237	0.84052	0.79357	0.63321	1.63353
1.16428	0.81909	1.18182	1.05664	0.72452	0.9347	0.86656	0.92578	0.99911	0.98408	1.16451
1.00171	0.99203	0.94537	1.0792	0.72069	1.18173	0.88295	0.81574	0.94191	0.83191	0.63176
0.99684	0.66419	0.89873	0.98869	0.39186	0.97895	0.91654	1.01849	1.0102	0.85944	0.93806
0.86894	0.8085	1.02099	1.01513	1.08558	1.12602	0.75861	1.07667	0.98288	0.88832	1.49804
1.12429	0.99181	0.4547	1.01903	0.89257	0.98841	0.70552	1.19304	0.66817	0.45873	1.10825
0.87082	0.77461	0.98059	0.95751	0.85734	1.33153	0.73548	1.02796	0.42483	0.56447	1.28048
1.10619	0.89481	1.09046	1.08853	1.24163	1.07008	0.83988	0.87679	0.99951	0.48021	0.71841
0.94283	0.91874	1.14449	1.07973	1.11164	0.92913	0.90389	0.8502	0.81122	0.75511	1.01668
0.6718	0.75679	1.13253	0.94972	0.94531	1.16032	0.77684	0.91787	0.76919	0.57834	1.19133
1.08364	0.83909	1.0758	1.00597	1.01093	0.58244	0.76634	0.37342	0.62765	0.77076	1.05719
0.71771	0.82158	1.16748	0.98601	0.7549	0.84745	0.65998	0.97676	0.57449	0.82732	1.02408
1.06579	0.8406	1.05427	0.97986	0.81781	1.41673	0.75367	0.53973	0.77292	0.62897	1.03658
1.06411	1.02678	1.13788	0.99309	1.24434	1.05558	0.84814	0.8956	1.06809	0.58602	0.82966
1.13776	0.99922	0.96521	1.01261	1.00899	0.9797	0.98156	0.87894	1.03719	0.54832	1.28533
0.92385	0.75419	1.01883	0.69355	0.69903	0.89825	0.75269	0.88711	0.83018	1.27141	1.20771
1.09088	0.91829	1.00857	0.55336	0.929	0.98453	0.87377	0.69085	0.91676	0.48484	1.28834
1.11095	0.73143	1.01689	0.97669	1.049	1.85947	0.69032	0.55794	0.99139	0.85302	0.99308
0.83474	0.74357	0.85157	1.0203	0.86687	1.03045	0.79431	0.8978	0.94364	0.74389	0.93102
0.94628	0.62642	1.03455	1.13277	0.8411	1.17631	0.89896	1.06815	0.94232	0.71937	1.03643
0.79733	0.93786	1.57766	0.77737	1.00861	1.17004	0.76014	0.87662	0.95372	0.70577	1.14673
0.9789	0.89709	1.08298	1.09751	1.03974	1.24984	0.84738	0.72522	0.77137	0.82399	1.24823
0.58737	0.95579	0.92831	0.94989	0.86418	0.68711	0.67821	0.85579	1.27298	0.9212	1.19636
0.92914	0.82359	0.73668	1.00371	1.06998	0.93712	0.8043	0.65392	0.9284	0.44986	0.53375
1.04209	0.78447	1.05686	0.88558	0.83636	1.13168	0.91549	1.03748	0.96143	0.43989	1.34036
1.13382	0.89316	1.05285	0.61378	0.67157	1.03771	0.61954	0.89888	0.76292	0.29205	1.14463
0.86735	0.88314	1.07054	0.69025	1.02202	1.11888	1.37768	0.83733	0.72263	0.79311	0.99223
1.1567	1.00981	1.16948	0.96234	0.9811	1.1354	0.99275	0.79689	0.8012	0.85017	0.55613
1.20288	0.32099	0.93363	0.83748	1.05487	0.82895	1.00026	0.64605	1.19532	0.809	0.94072
0.78766	0.8673	0.90412	1.10307	1.05993	1.16998	1.01881	0.82235	0.90201	0.68911	0.49508
1.261	1.02124	1.04145	0.98669	0.69716	0.84842	0.83214	0.81681	0.51779	0.44329	1.28435
1.098	0.78091	1.03829	0.98155	0.84846	1.17545	0.99838	0.80758	0.56544	0.84288	0.72604
0.80965	1.03947	1.14172	0.63111	3.30944	1.00585	0.96214	0.96882	0.56453	0.90461	1.3232
0.78235	0.72357	0.94706	1.08813	0.72885	1.13615	0.9191	0.87805	1.04033	0.46204	1.13057
0.8929	0.98813	1.15104	1.07156	0.64993	0.91753	0.95014	0.81534	0.60147	0.89436	0.79632
1.13638	0.95107	0.92158	0.96329	1.09788	0.92845	0.88367	1.01526	1.03277	0.75672	1.14542
1.08769	0.70042	0.78539	0.77495	1.11022	1.12925	0.86695	0.96071	1.03899	0.71968	1.21832
0.74947	0.84625	1.06165	0.98282	0.89075	0.52449	1.07798	0.84316	0.87962	0.59752	0.99694
2.64071	0.96598	0.53435	1.01979	0.62364	1.38639	0.93679	0.29256	0.74989	0.84676	1.1175
1.09228	1.18878	1.0832	1.14819	0.97228	1.10644	0.8955	0.78352	1.02588	0.76329	1.20001
1.05562	0.94549	0.84986	0.84193	1.00509	0.91294	0.67391	1.13715	0.85057	0.9097	1.01167
1.07183	0.85104	0.8855	1.08077	0.94999	0.98135	0.62282	0.92822	0.64076	0.637	1.34586
1.00151	1.05042	0.97595	0.76196	0.85394	1.03122	0.84342	0.71485	0.81008	0.897	1.01161
1.04994	1.06774	1.27151	1.05427	1.00343	0.83205	0.87819	0.82004	1.02233	1.04285	1.31646
1.05343	0.93412	0.965	0.8593	1.11227	0.61556	0.88316	0.93095	0.8342	0.76712	1.22373
1.03366	1.24662	0.95412	1.00057	0.76601	1.13379	0.64776	0.72927	0.8188	0.55238	1.08892
1.077	0.50038	1.05471	0.9731	1.15927	1.23548	0.81216	0.75058	1.00863	0.63295	1.14869
0.91457	0.95275	1.03921	0.99839	0.99098	1.10949	0.73207	0.9598	0.73343	1.41644	1.07143
0.67164	0.93776	1.04905	1.0789	0.83945	0.94036	0.91201	0.89008	1.01871	0.69201	1.05341
0.99493	1.14687	1.6003	1.17621	0.97707	1.09729	0.73501	0.74504	0.85041	0.75572	1.63571
0.96047	0.79435	0.98002	1.10336	0.90028	0.8074	0.7204	0.83944	0.73384	0.84809	1.07588
1.17485	0.69692	0.98623	0.85549	0.96902	0.97791	0.74047	0.80582	0.41368	0.80257	0.74905
1.30993	0.24232	1.16997	0.64521	0.88424	0.74126	0.88187	0.80409	1.23155	0.31531	1.27438
1.16769	0.84344	0.98975	0.85637	0.8246	1.01027	0.75422	1.11878	0.70281	0.75841	0.423
1.0311	0.99558	1.0434	0.73235	0.90521	0.95087	0.80972	0.94507	0.98875	0.86679	1.5172
0.95398	0.75415	0.99198	1.0217	0.90555	1.10196	0.79559	0.74965	0.97664	0.81497	1.21279
1.05707	0.58123	0.98528	1.15619	1.05962	0.79183	0.85065	0.92011	0.71605	0.77993	1.19318
0.84842	0.8566	1.04832	0.85286	0.83402	1.25347	0.94732	0.92328	0.80803	0.54774	1.1262
0.42333	1.02181	1.05401	1.03431	0.73861	0.89598	1.07767	0.8957	0.82205	0.77472	1.71716
1.08955	1.21463	1.11919	0.9886	0.73261	0.86592	0.90144	0.86381	0.67359	0.61325	1.29092
0.76013	0.79859	1.13241	0.88357	0.905	0.9776	0.9793	0.93278	0.78237	0.84291	1.11004
1.06865	1.06551	1.15641	0.55598	0.87766	1.13407	0.94145	0.71791	0.96532	0.81577	0.81323
0.69751	0.75263	1.14861	1.07429	1.05933	1.24816	0.86523	0.92342	0.7917	0.89106	1.19959
1.20443	1.10455	0.95753	0.57848	1.00678	0.98185	1.14732	0.78608	0.92143	0.45862	1.88097
0.93727	0.84633	0.82794	0.76918	0.89467	0.62141	0.9324	0.92096	1.05381	0.84973	1.22047
1.2388	0.62543	0.88715	1.01277	1.07162	1.46332	0.99565	0.95546	0.74549	0.86037	0.96315
0.88379	0.69083	1.00246	0.82899	1.01562	1.05826	0.54586	0.84958	0.92615	0.60724	1.34229
0.97244	0.89713	1.0606	0.96267	0.93885	1.03714	0.84919	1.01262	0.8916	0.81424	0.92261
1.01851	0.84426	1.02892	1.0144	0.90076	0.99709	0.87974	0.97086	0.78955	0.64521	1.20126
1.01611	0.91069	1.13734	1.20145	0.93673	1.12934	0.74703	0.85865	0.81201	0.75768	1.89307
0.8811	0.95392	1.00058	0.95238	0.72644	0.9038	0.72373	0.96251	1.10878	0.76027	1.22557
1.04717	0.95563	0.87473	0.92905	0.91628	0.74614	0.76247	0.95303	0.90354	0.51823	1.36551
0.8165	1.13593	1.06034	0.91586	1.08844	0.42705	1.00006	0.67084	1.01201	0.83079	1.23376
0.82063	0.6117	1.1317	0.88277	1.13916	0.77646	0.94081	0.74648	1.12379	0.47605	1.15263
1.13402	1.04388	1.18493	1.05039	1.2212	0.64594	0.83298	0.9006	0.90995	0.65478	0.75647
0.65299	1.04082	0.66896	1.04237	0.85848	1.22338	0.843	0.97334	0.57722	0.79386	1.48031
1.14305	0.88751	1.05807	1.11696	1.08221	1.00461	0.83352	0.83101	1.04778	0.67333	1.15628
0.45986	1.12806	0.693	0.91739	0.95028	1.09561	0.84813	0.80044	0.92425	0.80276	0.9145
0.99817	1.03936	0.98432	0.76537	0.85216	0.94456	0.75879	0.87347	0.93945	0.81671	1.10388
1.1063	0.9087	1.09461	0.97305	0.75416	1.06363	1.30837	1.12893	0.46913	0.73929	0.975
1.11193	1.00433	0.91678	0.83112	1.0318	1.2401	0.72701	0.90969	1.1498	0.71304	1.28506
1.0057	0.94752	0.95592	0.99283	0.87984	1.44539	0.88465	0.98328	0.85008	0.40734	0.85981
0.67587	0.77543	1.10962	0.62408	1.02738	1.14811	1.07083	0.69005	0.96931	0.59692	0.71174
0.98795	1.17118	1.4441	0.96299	0.65903	1.08072	0.9288	0.83438	0.73144	0.43619	0.74175
1.14325	1.14485	1.05386	1.00847	1.21243	1.02845	0.95055	0.95728	0.72482	0.77616	0.78377
0.89538	0.78542	1.18815	1.05948	0.84202	1.09386	0.91937	0.75286	0.98259	0.62319	0.72464
0.94445	1.20119	1.02127	0.75702	0.88107	1.01205	0.97014	1.01221	0.98559	0.35094	1.19862
0.92421	0.77049	1.08061	1.0061	0.95435	0.76144	0.75275	0.96831	0.81153	0.92369	0.87597
0.67536	0.98315	1.03824	0.99135	1.07645	0.84026	0.90358	0.61444	0.88652	0.63839	1.12888
0.95669	0.94654	1.20316	0.77476	0.80683	1.16292	0.81919	0.88785	0.91271	0.25366	1.21742
0.8941	0.9813	0.90884	1.01054	0.93056	1.20506	0.96933	1.56981	0.89444	0.82055	1.43908
1.09391	0.90999	1.10301	1.00961	1.01898	0.28412	0.63971	0.92409	0.98947	0.62662	0.86105
1.04792	0.90594	1.06733	0.80194	0.75855	0.91065	1.0164	0.43388	0.98907	0.64618	1.43614
0.96936	0.90203	1.1653	0.90022	1.08236	1.13128	0.42201	0.86229	0.78697	0.65202	1.10917
0.75977	0.81884	0.63296	0.97354	0.91873	0.70551	0.37184	0.83115	0.79298	0.82972	0.94033
0.93159	0.84015	1.13649	1.05837	1.10357	1.21187	1.01864	0.88983	1.00404	0.85641	1.24286
0.66072	1.07735	1.15801	1.09049	0.68016	0.93526	0.80152	0.92773	0.99226	0.46223	0.79685
1.16583	0.87334	1.05154	1.33823	1.11224	1.08335	0.56324	0.74911	1.27357	0.49102	1.0722
0.83774	1.00547	1.27179	0.69441	1.06095	1.01795	1.02219	0.9831	1.03331	0.39528	1.31249
1.16234	0.93033	1.24665	0.85525	0.55842	1.0157	0.96647	0.73268	0.79823	0.64719	1.3305
0.95837	1.02993	0.84985	1.02316	0.92393	1.01993	0.82952	0.92153	0.76067	0.4224	1.06754
0.91922	1.09556	1.15046	0.99343	0.91062	0.98799	0.89309	0.89735	0.76384	0.94364	1.15423
1.19257	1.03989	1.152	1.12298	1.03607	1.22509	0.87343	0.54985	0.7528	0.5464	1.19884
1.11075	0.64236	1.23836	1.00268	0.99265	1.1722	1.00256	3.9688	0.64317	0.59446	1.2474
1.02247	1.08246	1.97332	0.78013	0.88275	0.74445	0.82888	0.71335	1.20228	0.58517	1.02162
0.78935	0.71301	1.23049	0.69078	0.90815	0.88999	0.85501	1.00072	1.02793	0.63374	1.12064
1.12369	1.02163	0.96239	0.86218	1.11864	1.034	0.72253	1.14605	0.89628	0.61488	0.80287
0.93908	0.88956	1.15631	1.20005	1.04813	1.11816	0.86123	0.92478	0.97267	0.39722	1.21945
1.16414	0.99611	1.09552	1.02204	1.10098	1.04358	0.88316	0.9645	0.84927	0.93099	1.17724
1.16266	0.90906	0.86686	0.90524	1.16729	0.742	0.5569	0.92254	0.96419	0.50748	1.10642
1.00271	0.90215	0.9344	1.01098	1.14402	0.91155	0.69419	0.78266	0.90457	0.88473	1.32733
0.9839	0.97778	1.19121	0.918	0.84979	1.12075	2.48812	0.81501	0.95182	0.68545	1.19682
0.98684	0.84884	2.24792	1.0261	0.75823	0.93453	0.79583	0.89294	0.97766	0.97821	1.33138
1.12117	1.08643	1.17039	0.75393	0.87186	0.93577	0.75198	0.92921	0.74935	0.73315	0.99106
0.85202	0.97012	1.23608	0.72101	1.13919	0.89945	0.64032	0.85212	0.96933	0.84407	3.89309
1.06056	1.0639	1.169	0.83443	0.64579	1.16303	0.98714	0.75116	0.91472	0.44604	1.11859
0.74885	1.01748	1.07735	0.7578	0.98598	0.93644	0.91373	0.72357	0.56035	0.59084	1.14883
0.91032	0.82626	1.00097	0.99663	0.81022	1.13422	0.91305	0.70996	0.8774	0.57461	1.01418
0.90672	0.81787	0.89531	0.82719	0.88829	1.00102	0.81445	0.49339	0.86829	0.70002	1.18861
0.95674	0.87955	1.03709	0.92091	1.08181	1.14027	0.89395	0.67233	0.81434	0.67669	0.93285
0.9412	0.75655	1.07506	1.0731	0.87793	1.23479	0.61004	0.79064	0.935	0.69763	0.94657
0.95418	0.86885	2.66936	0.85722	1.02272	1.15348	0.92401	0.80556	0.41676	0.786	1.42771
0.93849	0.58583	1.00388	1.10474	1.10346	1.33559	1.17071	1.02662	0.82076	0.53745	0.65106
1.02575	0.82279	1.10861	0.83832	0.99062	1.04662	0.99999	0.92759	0.57188	0.72762	0.86974
0.76077	0.98664	1.09723	0.8626	0.58267	1.39097	0.84817	0.85713	0.90657	0.9116	1.37758
1.21396	0.98439	1.00997	1.1349	0.8638	1.29566	0.21438	0.86437	0.9422	0.79933	1.21715
0.77855	0.87427	1.09462	0.92519	1.01903	1.19132	1.02265	1.05688	1.04384	0.57629	1.17828
0.90062	0.90714	1.19197	0.86719	1.12423	0.96882	0.86861	0.6564	0.70634	1.06857	1.22891
1.11102	0.63102	1.19615	0.87532	0.80706	1.0914	0.69395	0.62403	0.95238	0.78509	0.89339
1.00931	0.77361	1.01736	0.8386	1.09512	0.79068	0.8671	1.06294	0.93608	0.60789	1.0634
1.24205	0.98956	1.40327	1.03084	0.73762	0.54149	0.87545	0.87122	0.91321	0.74529	1.35726
0.9227	0.82209	1.06888	0.58871	0.85076	0.98405	0.80816	0.88288	0.62651	0.3821	1.29023
0.8106	0.90906	1.23173	1.10819	0.96509	1.19184	0.88378	0.69764	0.73844	0.98335	1.23459
1.01236	0.99555	0.98195	0.98313	1.05439	0.78181	0.80348	0.78996	0.84041	0.89634	1.00078
1.07577	1.04927	0.97371	0.84996	0.61964	0.53578	0.81889	1.13571	0.86302	0.58747	1.0383
1.04036	0.85312	1.00103	1.02207	1.0242	1.23459	0.65827	0.99074	0.86524	0.8765	0.57695
0.85626	1.12183	0.91434	0.84186	0.96557	0.89034	0.81242	0.92548	0.70167	0.55242	0.87802
1.0732	0.97138	1.19613	1.10023	0.6753	0.66812	0.9753	0.94957	0.90836	0.41228	1.37487
1.06985	0.97996	1.18146	0.78938	0.85743	1.00193	0.96332	1.14619	0.90851	1.29899	0.92827
1.02064	0.8707	1.20744	0.70928	0.99647	1.25765	0.91049	1.03356	1.02135	0.57858	1.03507
1.19366	0.87641	1.1286	0.99721	1.10698	1.23627	0.99658	1.04155	1.03299	0.6518	1.11222
0.93078	0.84027	1.22441	0.95501	0.61765	0.7681	0.8565	0.72605	0.89326	0.47822	1.25542
0.85839	0.8592	0.96514	1.06217	1.11249	0.60907	0.87565	1.02941	0.94634	0.37054	1.31274
1.00121	0.97771	1.04636	0.98716	1.87874	0.47978	0.80768	0.94941	0.89567	0.71806	1.02917
0.8628	1.00466	1.03401	1.0296	0.92978	1.0067	1.06602	0.7992	2.17244	0.70087	1.70399
0.96241	0.74955	1.06244	0.90866	1.17293	1.24692	0.88185	0.91365	1.018	0.76717	1.10825
1.03934	0.93196	1.05642	0.85789	0.85096	1.19379	0.73318	0.94957	0.96036	0.96069	1.21711
0.66378	0.63998	1.15935	1.00182	1.01385	1.23119	0.7147	1.14329	0.71283	0.83091	1.28127
0.92546	0.94629	1.03007	1.02746	0.90447	1.2091	0.77365	1.00941	0.76453	0.8449	0.93989
0.84362	0.76491	1.18697	1.12357	0.8286	1.13101	0.83769	0.7859	0.83911	0.90508	1.25638
0.28311	0.91217	0.92425	0.42447	1.05637	1.02488	0.8003	1.203	0.53229	1.13211	1.19853
0.93469	1.09372	0.91338	0.91243	0.89386	1.154	0.85143	1.07459	0.70764	0.68892	1.25032
1.00415	1.02991	1.2491	0.80726	0.93066	1.13434	0.86676	0.73602	0.94151	0.67729	0.79247
1.0367	0.67771	1.25433	0.80072	1.29433	0.58421	0.9155	0.85565	0.72146	0.69029	1.18596
0.99723	0.95979	1.09963	1.01747	1.00183	0.95759	0.94034	0.78063	1.25981	0.77776	1.28139
1.13052	0.73228	0.88753	1.04832	0.86101	0.96265	0.65212	0.59579	0.79915	0.71147	1.48503
1.02915	0.99356	1.11348	1.29416	0.79812	1.46003	0.8494	0.90683	0.72009	0.88993	1.13048
0.91438	1.19846	1.11688	1.03252	0.93633	1.0753	0.64188	0.69866	0.93248	0.59652	1.25402
0.99023	0.8616	1.0292	1.03149	0.68504	2.21919	0.82714	0.94978	0.58981	0.82573	0.68946
0.92148	1.07623	1.08436	0.90958	0.66067	0.92508	0.83446	1.11486	0.97409	0.83057	0.57931
1.10528	0.99672	0.92869	1.01987	1.05943	0.89541	0.95306	1.04504	0.8281	0.55082	1.18941
1.01433	0.98286	1.26626	0.90662	0.7986	0.72162	0.77181	0.75209	0.98304	0.90181	0.93533
1.03957	0.87894	0.91525	0.94554	0.82999	1.25919	1.04967	0.64736	0.84354	0.60152	1.17296
1.17007	0.92306	1.08688	0.88032	1.08871	0.69779	0.94301	0.94203	0.78076	1.05099	1.07388
1.05153	0.9654	1.11824	1.03113	0.61352	1.17443	0.95553	0.78186	0.92378	0.84335	0.96645
1.17698	0.90404	0.7714	0.68884	0.96843	0.91673	0.77729	0.94057	0.79088	0.80669	1.2789
0.84652	0.82441	1.02323	0.9929	0.94383	1.13356	0.9336	0.95454	0.75922	1.22386	0.60697
0.97447	0.91494	1.20277	0.71953	1.02463	1.0766	0.57514	1.02007	0.86887	0.76355	1.22506
1.10064	0.91748	0.97682	1.14871	1.16566	1.14434	0.9022	0.7545	1.02632	0.83629	1.18741
0.92225	1.05377	1.35139	0.85809	0.67706	1.25436	0.93123	0.90891	0.78085	1.06644	1.31948
1.04873	0.62844	1.1468	0.56817	1.00569	1.04777	0.74281	0.90697	0.81651	0.77456	1.07121
1.01647	0.94082	1.03136	0.86367	1.07754	1.15088	0.94647	1.13165	1.14455	0.69464	0.77736
0.75461	0.94994	0.99724	0.86906	0.83629	1.6105	0.83624	0.73436	0.9643	0.67332	1.28742
1.08659	0.91213	1.07343	1.02057	0.85052	1.20751	0.91867	0.9578	0.80667	0.3877	0.94993
0.83655	0.91122	1.09071	0.87899	1.03232	0.84551	0.90886	0.9037	0.87766	0.56623	1.07921
1.13062	1.0843	1.02957	1.03534	0.96755	0.88376	0.91934	1.99288	0.6831	0.422	1.05006
0.95005	0.89746	1.23629	0.92699	1.02572	1.15466	0.66085	0.92473	0.50318	0.6001	1.22469
1.2169	0.98449	1.02798	0.84911	0.68092	0.94171	0.96024	1.14941	1.00102	0.94363	1.04851
0.80305	0.91962	0.99174	1.01606	1.1063	0.87498	0.63502	0.79488	0.7213	0.89042	1.53743
1.12662	0.94659	0.98786	1.19204	1.17035	1.13381	0.53703	0.88899	0.8003	0.8603	0.51859
0.91087	0.7292	1.05912	0.87713	1.0649	1.09236	0.40897	1.00521	0.92448	0.55491	0.86369
1.10708	0.9614	0.84717	1.1851	1.12911	1.18751	0.83569	1.11369	0.40348	0.46245	0.8501
0.98303	0.92198	0.98569	1.42186	1.05273	1.04646	0.56616	1.24012	0.92424	0.70301	1.05524
1.12732	0.60113	1.14092	0.80489	0.95349	1.09485	1.12754	0.91225	1.00124	0.79444	1.21643
1.1272	0.97901	1.29823	1.12623	0.67843	0.79194	0.73636	1.24265	0.70245	0.56643	1.1877
1.08965	0.7379	0.80042	1.0847	1.03487	1.20751	0.77344	1.01156	0.70567	0.76363	1.08606
0.94489	0.86142	1.25777	0.93849	1.07595	0.928	0.85891	0.70092	0.38397	0.9341	1.25077
1.0592	0.81638	1.66285	0.6511	0.81083	1.12168	0.90106	0.57183	0.55435	0.71399	0.71433
1.20922	0.86026	0.93684	0.85565	1.01337	1.12719	1.06392	0.78426	0.83261	0.75045	1.06034
1.12561	1.02065	1.19156	0.82872	0.69608	1.20313	0.58255	0.8465	1.05564	0.55271	1.0193
0.93768	1.17501	1.1221	1.12753	0.87472	1.11883	0.91807	0.90805	0.91224	0.71154	1.17275
1.04082	0.87974	0.99008	0.83017	0.86601	2.12219	0.89292	0.83619	0.69434	0.73752	1.09063
0.86847	0.93609	1.10903	0.99348	1.05733	1.18937	0.84836	0.82108	0.66164	0.63079	1.14842
1.26028	0.99409	0.51446	0.87229	0.97155	0.87061	0.81813	0.90753	0.67558	0.8473	1.23687
0.90684	0.75675	0.84765	0.91338	1.01559	1.19589	0.79714	0.87681	0.65148	0.52235	1.15777
0.84079	0.86495	1.16292	1.08167	0.79507	0.89603	0.99242	0.81597	0.77819	0.77034	1.01363
0.8142	1.23901	1.07049	0.88064	1.08851	1.22093	0.91481	0.60507	0.36746	0.55128	1.14978
1.10962	1.01403	1.13808	1.20815	1.11199	1.3081	0.84137	0.89314	0.49884	0.51458	1.21372
0.77212	0.99412	1.17201	0.96065	1.01176	1.08526	0.90561	0.29163	0.73661	0.6867	1.22188
0.82108	0.71926	1.0464	0.83273	0.8366	0.84275	0.66568	0.61494	0.80908	0.78193	0.96587
0.96806	0.56781	1.4562	1.84357	1.02427	0.97742	1.06953	0.60477	0.91907	0.52197	0.73155
1.01673	1.03337	0.79724	0.94676	0.89186	1.12525	0.8924	0.94216	0.68873	0.50151	1.38373
1.18558	0.61443	1.02277	0.99243	0.9778	1.06719	0.67893	0.92866	0.57313	0.82871	1.03862
1.03801	0.9693	0.8899	1.03223	0.87491	0.95834	0.79103	0.97757	0.91672	0.62903	0.98487
1.15337	0.93037	1.23764	0.72829	0.91801	0.97219	0.82994	0.90821	0.848	0.90642	1.19149
1.05569	1.0529	0.9854	0.70387	0.87375	0.64931	0.9256	0.78517	0.82297	1.05649	1.26103
0.7581	0.96065	0.8565	0.99094	0.98167	0.48295	0.80955	0.92783	0.79561	0.86092	2.1425
0.88014	0.8664	1.00364	0.91578	0.4748	2.85942	0.88744	0.76966	0.79085	0.81288	1.24421
0.99365	0.92716	1.13262	1.01858	0.79987	1.08343	0.68402	0.65792	1.03392	0.94862	1.4056
1.20205	0.86911	1.14187	0.87305	1.07989	0.4914	0.84669	0.58034	0.97185	1.1939	1.16635
1.18291	0.8887	1.0883	1.06219	0.97666	0.87601	0.89998	0.91528	0.73969	0.50464	1.02944
0.53248	0.65979	1.14593	1.05607	1.15268	0.70507	0.30637	0.81693	1.07899	0.60316	0.88218
0.76704	1.08928	1.03711	1.03653	0.62166	1.02002	0.82383	0.90536	0.99444	0.74423	1.05824
1.88204	0.99687	0.87749	1.05895	0.48512	1.10459	0.67196	0.87569	0.63511	0.28361	1.19769
0.98815	0.84367	1.02989	0.84183	0.76231	1.09566	0.69377	0.8802	0.6665	0.51697	1.51323
0.88819	0.94652	1.13461	1.08119	0.94823	1.1848	0.9114	0.8682	0.72695	1.08116	1.78697
1.10402	1.10816	1.03693	0.86848	0.89687	0.86894	0.80969	0.83071	0.84812	0.7218	1.08682
0.98356	0.87991	0.77386	1.24939	0.92087	1.00727	1.11818	0.55526	0.9162	0.69217	0.64358
1.27225	0.73869	0.98236	0.86662	0.90893	0.69957	0.28409	0.7192	0.85568	0.57734	1.56535
1.27227	0.75995	0.92611	0.63444	0.96314	1.26839	0.82394	0.75128	0.56505	0.71877	1.06651
1.03604	1.74598	1.07157	0.9301	0.82955	0.86113	0.84538	0.85007	1.0217	0.48989	2.37946
0.51752	0.65673	1.27258	1.22115	0.89387	1.80719	0.72326	0.93027	0.96162	0.53256	1.05728
1.03625	0.86654	0.92363	1.01156	0.92566	1.15098	0.68308	0.78553	0.73853	0.60985	0.96431
0.93174	0.92205	0.92205	1.22741	1.16037	1.0313	0.96908	1.09117	0.93385	1.0164	1.54676
0.97008	0.87772	0.92024	0.74975	0.7395	0.96048	0.89439	0.66744	0.74392	0.53134	1.37099
1.0878	0.85986	0.99161	0.90426	1.13166	1.0095	0.86131	0.72753	0.99402	0.67322	1.26014
1.01172	0.58516	1.02247	1.19834	1.06125	0.89101	0.58235	0.68386	0.5774	0.6107	0.81438
0.72215	0.93426	1.11247	0.90608	1.0307	1.10601	0.60914	1.01833	0.83504	0.83841	0.9834
1.0028	0.90875	0.57063	1.12861	0.9269	1.56096	0.8325	0.96301	0.69556	1.17818	1.53095
0.92858	0.80065	0.64278	1.09879	1.01111	0.80022	0.47119	0.47871	0.79684	0.90354	1.0718
0.8281	0.92479	0.35495	0.85288	1.06532	0.57863	0.63895	1.0981	0.87868	0.93201	1.11208
1.01112	0.66081	0.99279	0.71082	0.76326	1.11279	0.99148	0.96228	0.9786	1.20685	1.07169
1.0702	0.84297	1.06645	1.00783	0.9587	0.71389	0.90772	0.91919	0.95171	0.80717	1.2019
1.01695	0.94305	2.15533	0.93107	1.2139	1.08441	0.68983	0.99689	0.73921	0.88745	0.75225
0.89057	0.75687	0.86977	0.34541	0.87193	1.13492	0.95274	0.84263	0.89081	0.91743	0.98278
0.97717	0.72513	1.10215	0.96372	0.87353	1.08018	0.73151	0.74787	0.85821	1.06161	1.19964
0.86587	0.75825	1.16648	0.98329	0.72629	0.7945	0.85141	0.6295	0.76487	0.70327	1.07818
0.92403	0.92974	1.12511	0.93092	0.95984	1.07261	0.85107	0.96354	1.26392	0.64975	1.2574
0.96738	1.00858	1.11293	1.10574	1.12361	1.06181	0.5006	1.07187	0.71188	0.3215	1.04054
1.01768	0.98617	1.01845	1.0355	1.02718	0.97527	1.04666	0.77917	0.97038	0.75034	1.26612
0.95495	0.91222	1.69791	0.80409	0.94473	1.1403	0.72047	0.75082	0.58906	0.84704	0.51752
1.0635	2.23618	0.95602	1.17342	0.91248	1.04245	0.75009	1.03628	0.74375	0.69454	1.12667
0.93019	0.82495	2.27426	1.13824	1.06235	1.15569	0.74045	0.92114	0.75937	0.78119	1.34831
1.09819	0.98804	0.9389	0.80879	1.23529	1.15028	0.76418	0.79403	0.76499	0.9255	1.39496
1.26443	0.82922	0.90258	1.15705	0.95046	0.78276	1.05033	0.94495	0.89656	0.517	1.29961
0.83774	0.68984	1.04551	0.79108	3.9039	0.90513	0.58002	0.74132	0.98559	0.98642	0.89687
1.13162	1.05183	0.77966	1.03594	1.15595	1.08334	0.78639	0.70948	0.74003	0.72213	1.4227
0.74784	1.09581	1.02577	0.86682	0.38934	1.04808	1.02477	0.85475	0.92164	0.73272	0.4885
1.04719	0.90834	1.09967	0.96774	0.89518	0.77653	0.75944	0.8764	0.74829	0.80843	1.35521
0.73306	0.94087	1.11834	1.10052	1.13061	1.14849	0.83692	0.50754	0.71762	1.05114	1.18387
1.22832	0.92152	1.18293	0.83716	0.96351	0.71688	0.8702	0.9864	0.92225	0.79391	1.12823
1.07436	0.93106	1.07023	1.21163	0.8746	1.13485	0.93447	0.86127	0.88485	1.0229	1.23239
0.74886	0.86493	1.07676	1.08135	0.73759	0.8781	0.6273	0.99464	0.66714	0.65398	1.24702
1.05087	0.93298	1.00914	1.1652	0.92357	1.26728	1.0774	1.1996	0.76249	0.92448	0.55801
0.97022	0.89322	1.05727	0.91658	1.04039	0.82266	0.87389	0.97852	0.68175	0.72578	1.05973
1.03525	1.02717	1.29842	0.75117	0.69628	1.04755	0.77114	0.90345	0.84631	0.2256	1.31808
1.00775	0.84658	1.00171	0.96165	0.89385	0.69955	0.92631	0.8531	0.9897	0.79666	1.50202
0.96775	0.77239	1.28399	0.87089	1.10334	1.03239	0.66866	0.99367	0.92622	0.71064	1.02123
1.14075	0.85557	0.92051	0.95583	0.87722	1.72256	0.95676	0.85276	0.98996	0.96561	1.2303
1.09511	0.86444	0.96787	1.07514	0.77645	1.04206	1.12322	1.09026	0.79751	0.73261	1.38182
1.348	0.97943	0.90834	0.93166	1.06309	1.04529	0.93135	0.88763	0.88426	0.73242	1.2524
1.23123	0.86166	0.95353	0.88925	1.00705	0.99825	0.97607	0.80001	0.86132	0.50344	1.05402
0.9581	1.01916	1.08458	0.37898	0.5522	1.01934	0.92568	0.74882	0.91249	0.72585	1.03136
0.62493	0.88834	1.52403	1.03534	0.91809	1.07729	0.66452	0.86408	1.00043	0.70792	1.36355
0.91461	1.12875	1.37629	0.93976	0.78186	0.79105	0.90391	0.97696	0.42541	0.73193	1.45319
1.13691	0.97976	1.01943	1.11561	0.56494	0.92409	1.12787	0.86397	1.01287	0.93797	1.01802
1.3033	1.12701	1.07626	1.00094	0.99313	1.32742	0.61703	0.64369	0.78314	0.68015	0.95272
0.99653	0.86416	1.07313	0.94345	1.16801	0.93275	0.95584	0.98812	0.78727	0.84301	1.22221
1.15255	0.96185	1.20392	1.18589	0.55403	1.04734	0.87223	1.01432	1.40057	0.84422	1.17969
0.94257	0.96654	1.06833	0.99615	1.08755	1.15729	0.82462	0.9391	0.98379	0.63681	1.50046
0.66087	0.56743	1.13018	1.14604	1.31089	0.92521	0.74964	0.52713	0.88897	1.08084	1.02097
0.95263	0.95988	1.16736	0.8967	1.20863	1.18825	0.76884	0.77286	0.70678	0.7974	1.60593
1.05912	0.97599	1.01182	0.94478	0.82438	1.14713	0.83616	0.76296	0.90847	0.68643	1.10075
1.00123	0.84945	1.64827	0.8063	0.71182	1.1791	0.8639	0.92882	0.62769	0.90359	0.92188
0.97997	0.95201	1.13297	0.77731	1.09211	0.75204	0.88097	1.25488	0.60846	0.71447	0.9063
0.92542	0.88146	1.25273	0.98108	1.00946	1.17439	0.87592	0.83183	1.04966	0.76282	1.11967
1.07642	0.76981	1.14982	0.95865	1.04473	1.00386	0.94588	0.99007	0.91456	0.65274	0.8954
0.76061	0.81823	1.06997	1.13965	0.85467	0.96284	0.68741	1.0651	0.82682	0.59999	0.91216
1.12292	0.66762	1.10804	1.02343	1.01544	1.00755	0.93729	0.92371	0.76915	0.83326	1.26353
0.63631	1.04827	1.10972	1.03341	1.09573	1.12896	0.94164	0.81999	0.93756	0.8991	1.09873
0.73016	0.88912	0.88537	1.04175	0.80867	4.29277	0.65583	0.79115	0.75148	1.10454	1.32728
1.07353	0.83015	1.05959	1.1048	0.99494	1.17996	0.94541	0.75235	0.88461	0.92738	1.06256
0.61824	1.02078	1.98613	0.82514	1.1082	1.09272	0.84424	0.97647	1.13917	0.43837	1.2381
1.01926	0.95583	0.89877	0.87046	1.02101	0.72005	0.84739	1.07831	0.7038	0.72855	1.07054
0.90638	0.88565	1.24658	1.15565	1.15634	1.05523	0.8025	0.86509	0.97057	0.4862	1.06071
0.74802	0.77288	0.87825	0.91312	1.01064	1.17711	0.99107	0.99747	0.90735	1.10153	1.28299
0.92336	0.87023	1.04883	0.91389	0.95585	1.11799	0.73347	0.92663	1.02439	0.82417	1.30283
1.0139	1.03182	0.39449	0.87757	0.74638	1.20568	1.06139	0.74892	0.90291	0.59874	1.16518
0.873	1.05241	0.92178	0.79656	0.90187	0.7884	0.90798	0.62863	1.00649	0.85463	1.07898
1.14132	0.90239	0.97159	0.79844	0.53425	0.98204	0.73933	1.01554	0.62877	0.81702	0.93231
1.15204	0.96576	1.14953	0.69121	0.91077	1.17056	0.90109	1.03714	0.93031	0.72233	1.11958
0.99582	0.98535	1.12928	0.94896	0.7799	1.18729	0.41433	0.80344	0.99774	1.01903	1.15407
1.02987	1.04924	1.18316	1.03687	1.11092	0.97247	0.92714	0.71724	0.61023	0.54255	1.26502
0.91923	0.97767	1.1698	0.83068	0.91287	1.22028	1.14331	0.93191	1.16262	1.12805	1.00245
1.00144	1.02953	0.96903	0.90957	0.93752	1.10054	0.97197	0.98177	0.88392	0.57834	1.21385
0.7999	0.85177	1.02428	0.45191	1.03293	0.96399	0.94915	0.76174	0.93395	0.64444	1.4834
0.86414	0.95993	1.02274	1.71292	1.02964	0.88096	0.88754	0.8346	0.92624	0.63278	0.92082
0.8821	0.88354	0.96659	0.84338	1.05015	0.60392	0.86171	0.94555	0.71644	0.87046	1.21038
1.23099	0.87258	0.87404	1.08353	0.84943	0.91537	2.32267	0.93499	0.8813	0.58456	1.01506
0.84227	0.9124	1.08178	1.10809	1.07134	1.09466	0.6594	1.09297	0.9052	0.47363	1.21415
0.85387	0.74014	1.11954	0.91969	0.55517	0.88258	0.93086	1.03715	0.52412	1.07129	1.00999
0.92229	1.27027	1.02422	0.77507	1.0674	1.2609	1.04641	1.01576	0.91048	0.68478	1.06521
1.02778	0.94673	1.48753	1.06575	0.73498	1.11535	0.95491	1.05101	0.92981	0.92261	1.34971
0.9088	0.71225	1.07099	0.96989	0.82631	1.24594	0.84502	0.95253	1.06544	0.82537	0.7617
0.99678	0.95105	0.57313	0.815	0.96524	1.13354	1.03371	0.98831	0.82446	0.51967	1.21512
1.0104	0.93332	1.72436	1.03562	0.98368	0.99927	0.68542	0.68682	0.80063	0.98312	1.22087
1.04682	0.40681	0.98051	2.56136	1.00203	1.30671	0.71539	1.04142	0.84888	0.2285	1.30467
0.86903	1.1657	1.1058	0.82772	1.29616	1.06642	0.9447	1.15448	0.89381	0.84056	1.12714
1.12778	0.79385	0.91125	1.01448	0.75836	1.22818	0.85753	0.80932	1.03598	0.45992	1.18378
1.05418	0.95249	1.02387	0.93676	0.93841	1.16602	0.60001	0.81371	0.93463	0.44398	1.49263
0.88432	1.01225	1.84853	1.85255	0.99687	1.05308	0.60671	0.54254	1.00444	0.75238	1.12844
0.94357	0.88145	1.23952	0.64873	0.80989	1.18188	0.88153	0.24749	0.85081	0.9009	1.31594
1.1822	0.95287	1.09338	0.97768	0.88007	0.83864	0.68862	0.96077	0.91259	1.04154	1.34184
0.81485	1.05714	1.0349	1.02842	0.88432	0.99002	0.9598	2.07216	1.00136	0.8147	1.15231
0.85922	0.98583	1.0348	0.8456	0.97154	1.0583	0.97488	2.12302	0.81722	0.87896	0.83112
1.03981	0.78331	1.0122	1.00667	0.63422	0.81418	0.83923	0.3209	0.89329	1.17713	1.04502
0.66726	0.47255	1.1307	0.70528	1.02925	0.86318	1.01823	0.66739	0.68135	0.83315	0.43905
1.10792	0.86746	1.06047	1.09916	0.72823	0.28227	0.80131	1.22428	0.85153	0.76516	1.08352
0.72022	0.6481	1.05925	1.02998	0.77568	1.02982	0.67153	0.88302	0.7506	0.83894	1.15098
0.5627	0.69068	1.2163	0.91066	0.83735	1.16584	0.74695	0.94741	0.76614	0.82001	1.33717
0.7319	0.93916	0.91006	1.07931	1.1126	0.68581	0.67402	0.86252	0.7413	0.76164	0.67735
1.08081	0.24275	1.02927	1.00315	0.72579	0.99034	0.88222	0.84151	0.96483	0.63648	1.19718
0.91838	0.82002	0.9451	0.96795	1.11361	1.01763	0.58059	0.8976	1.00423	0.58921	1.00326
1.18387	0.71288	1.08811	1.09944	0.85747	0.67611	0.86326	0.86182	0.88725	1.14988	1.05508
1.02616	0.47739	0.99407	0.94478	0.88441	2.42565	0.83127	0.71913	0.94242	0.83405	1.30558
1.06504	0.92029	1.47942	0.87725	1.04355	1.15865	0.90591	0.97883	0.89744	0.79633	0.88697
0.80062	0.90379	0.32387	0.88123	0.73849	1.21085	0.92245	0.49796	0.8527	0.74651	1.31097
1.15811	0.76829	3.25302	0.82715	1.0976	0.5288	1.06266	0.7393	0.99466	0.62449	1.12713
1.45503	0.50667	0.60366	1.00138	1.33727	1.09956	0.72814	0.63999	1.96435	0.82581	1.35465
1.21363	0.97621	0.76444	0.96739	0.68763	1.21575	0.73215	0.49934	0.98121	0.88878	1.11037
1.1142	0.86396	1.09795	1.04096	0.74918	0.98534	0.76992	0.72453	0.63337	0.58996	1.11216
0.85044	0.50228	1.0405	0.95801	0.97676	1.0243	0.73899	1.04681	0.8284	0.69392	1.05285
1.12184	0.71872	0.61609	1.29402	0.95753	0.88564	0.85469	0.92701	0.75921	0.60768	1.93402
0.9051	0.93311	2.36668	0.61124	0.7304	1.18628	0.86357	0.97813	0.96993	0.75728	1.09027
0.79781	0.89704	2.49616	1.1112	1.27152	0.99701	0.99841	1.05496	0.86343	0.4443	1.21869
1.07355	0.97817	1.06091	0.84594	1.14336	1.09837	0.48727	0.85572	0.84614	0.76782	1.10221
1.13134	0.83037	1.16394	0.92041	1.14702	1.15011	0.98782	0.85645	1.01523	1.11383	1.0934
0.97144	0.84205	1.10475	0.65135	0.79635	1.15994	0.89056	1.04695	1.02132	0.42658	0.94516
0.825	0.85542	0.86206	1.10104	1.12641	0.85917	0.62191	1.54126	0.83954	0.56088	1.02698
0.7864	0.79819	0.85034	0.96736	0.94084	1.19352	0.72183	1.03827	0.76784	0.62702	1.12262
1.07018	0.98281	1.1059	0.86771	0.51888	1.25926	0.95867	0.85173	0.87775	0.79906	0.82201
1.29525	1.01941	1.03984	1.06293	0.84083	0.70979	0.78658	0.72531	0.78296	0.68727	1.11703
1.03151	1.07847	0.93728	0.69731	1.00685	1.05328	0.69029	1.01421	0.91089	0.90597	1.09253
1.0975	0.59939	1.10306	0.92686	1.01938	0.98536	0.96707	0.75841	0.61119	0.67239	0.97956
1.04765	0.94852	1.06573	0.63478	1.07145	0.74854	0.70725	0.70757	0.84243	1.03682	1.22847
0.882	0.84433	1.00405	1.04589	1.06724	0.74273	0.74834	0.91474	0.86882	0.70761	0.87127
0.95153	0.98878	0.97835	0.98265	0.88728	1.04261	0.95706	0.93972	0.39594	0.68319	0.87074
0.94817	0.0521	0.9776	1.17757	1.05175	1.10755	0.91267	0.79177	0.86863	0.57138	1.0326
1.02748	0.87372	1.2433	0.75159	1.02892	2.23104	0.9281	0.83139	0.99445	0.64565	1.27545
1.11703	0.46787	1.15526	1.08733	0.88404	1.13829	0.94578	0.8633	0.9345	0.67269	1.23623
0.83803	0.92598	1.0266	0.91591	0.98043	1.0091	0.6316	0.8227	1.08464	0.99165	0.96571
1.08435	0.94301	1.01083	1.33505	0.92306	1.05802	0.80028	0.85994	0.98974	0.71921	1.24265
0.9775	1.00818	1.63423	0.99632	1.03873	0.76782	0.92649	0.99384	0.57452	0.77354	1.17189
0.99893	0.84541	0.99353	0.92267	1.11681	0.92662	0.82197	0.96663	0.86333	0.82332	0.98969
1.06173	0.52938	1.1177	1.11746	1.11051	1.08556	0.87083	0.92125	0.59429	0.97254	0.71198
1.09949	1.06127	0.82884	0.89684	1.11621	1.16619	1.06867	0.72022	0.84766	1.02755	1.45941
1.03312	1.05948	1.01128	1.10416	0.96603	1.10112	0.6821	0.83234	0.91587	0.81639	1.17258
0.88065	0.97596	0.89626	0.87437	0.8124	1.30391	0.81225	0.9171	0.79571	1.0981	0.95827
1.06354	0.54932	1.11208	1.00324	0.99066	1.19061	0.8427	0.96112	0.95443	0.70637	0.87349
1.08834	0.89002	1.05455	0.90068	0.85761	1.13326	0.84177	0.94359	0.87022	0.478	1.13026
1.10764	0.91799	0.89086	0.68085	1.09387	0.93788	0.96477	0.31557	0.76223	0.55302	1.16427
1.13087	3.86227	0.89525	0.99325	0.99833	1.06476	0.84741	0.92974	0.72064	0.9823	1.00541
1.17085	0.73848	1.07105	0.86562	0.92507	1.18187	0.78104	1.08993	1.11952	0.55834	0.97518
0.95164	0.7025	1.50477	1.08943	1.16809	1.46818	0.76682	0.8207	0.92353	0.98535	1.16583
0.6641	0.93247	1.26856	0.9053	0.97466	1.14726	0.81473	0.61144	1.25814	2.62801	2.197
1.10166	0.36737	0.95368	1.01334	0.84151	1.09162	0.8464	0.95688	0.98489	0.48607	1.2171
1.04908	0.91104	1.0113	0.77428	1.01689	0.92955	0.99793	0.9571	0.97429	0.85138	1.79572
0.99886	1.03754	0.96737	0.7435	0.97022	0.81725	0.71717	1.01582	0.92956	0.51625	1.17971
0.95917	1.12412	0.99587	0.95816	0.87161	1.18774	0.85283	0.73076	0.78341	0.8595	1.14168
0.75085	0.54039	1.15481	0.98039	0.6284	0.77382	0.94563	1.02994	0.95212	0.58369	1.03068
0.88623	1.08994	0.9079	0.95515	1.02007	1.03725	0.70625	0.88312	0.63687	1.26698	1.30801
1.14583	0.82748	0.66735	1.01244	0.91053	1.07302	0.53285	0.8423	0.846	0.64931	1.33044
0.91531	0.894	1.08349	0.98363	0.98498	0.60542	0.80529	0.80123	0.21162	0.47657	1.13294
0.65881	0.93031	1.093	0.66526	0.98879	0.5546	0.4958	0.77923	0.61563	0.78402	1.17816
0.88014	0.88174	1.03419	0.99324	1.07347	1.12901	0.81261	0.80242	0.8306	0.57854	0.69882
0.94227	1.00319	1.15897	0.74996	0.65293	1.11643	0.88311	0.85975	0.76962	0.78302	1.20224
1.23399	0.9609	1.00303	1.07976	0.91193	0.92026	0.74321	0.82115	0.90302	0.84114	1.06687
1.2935	1.08669	1.1524	1.12918	0.91479	1.36801	0.63357	0.8783	1.06804	0.76152	1.09808
0.93476	0.95107	0.97872	1.10663	0.98693	1.2471	0.81007	0.97025	0.90371	1.1438	0.53946
0.89573	0.9309	1.12438	1.03205	1.13159	0.88975	0.56082	1.04745	0.74611	1.06498	0.69379
1.00057	0.80747	1.10574	0.99158	0.94091	1.0729	0.77636	0.69728	0.48749	0.43861	1.46686
0.90577	0.88253	1.04729	1.00361	1.2553	0.75627	0.84018	0.77549	0.95216	0.46997	1.12887
0.95878	0.99012	1.09974	0.63306	0.98578	0.62919	0.76576	0.82746	0.82215	0.46619	1.12291
1.28587	0.90992	0.98147	1.08936	0.99136	1.08129	0.94227	0.82913	1.1356	0.66906	1.27154
0.77714	0.77078	1.08109	0.8636	0.96624	0.90691	0.7491	0.93767	0.91318	0.55841	1.19222
1.06541	1.12729	1.01544	1.16675	1.05344	1.0068	0.73129	1.13641	1.13387	0.7034	1.33219
1.01904	1.02779	1.07717	1.03854	0.98741	0.65716	0.71607	0.82403	0.52931	0.51548	1.18637
1.06658	0.90369	0.77711	1.0365	0.79336	1.06628	0.82351	0.76117	0.6043	0.77755	1.00086
0.63555	0.89162	0.97042	0.99668	1.05531	1.37317	0.78963	0.91455	0.69811	0.71403	0.9626
1.05136	0.95875	0.97265	0.46264	1.03282	1.14334	0.88672	0.95156	0.69655	0.80034	0.88461
0.95007	0.89519	0.97165	0.96241	0.91993	1.14632	0.93903	1.02436	0.74746	0.6983	1.16018
1.34783	0.77189	1.09238	1.0064	0.96485	0.98322	0.7852	2.03713	0.74636	0.83995	0.88585
0.90733	0.93955	0.97889	1.03148	0.77019	1.3299	0.91375	0.64721	0.53026	0.74832	1.38723
0.94505	1.11634	0.65055	0.95981	0.94508	1.15934	0.33606	0.54989	0.47235	0.84973	0.97736
1.30997	1.00723	0.98848	0.62612	1.03956	1.09617	0.78301	0.87111	0.58344	0.53483	1.33793
0.94647	0.91977	0.94015	0.85491	1.16865	1.10435	0.84112	0.58137	0.78687	0.80564	1.47896
1.06331	1.08588	1.0621	1.04255	0.92878	1.04382	0.5522	0.97716	0.65153	0.87248	2.7589
1.12579	0.83824	0.89295	0.70719	0.78483	1.12895	0.88999	0.75353	0.63532	0.69311	0.7568
1.05672	0.82371	1.03783	0.77487	0.75743	1.01713	0.81766	1.02291	0.75109	1.12012	0.8672
1.03987	0.91462	0.87517	1.38956	0.8806	0.85139	0.94477	0.86307	0.56611	0.69807	0.98836
1.36659	0.8107	1.15157	1.02822	0.80076	0.8815	0.85701	0.77629	0.76263	0.28095	1.66255
1.06227	0.92685	1.12243	0.95962	0.85731	1.64088	0.89065	0.67976	0.97106	0.42736	1.76839
0.85295	0.32206	0.96093	0.55706	0.84631	1.28393	0.88145	0.84427	0.28877	0.68392	1.32972
1.02151	0.9273	1.13206	0.74382	1.89258	0.97952	0.78046	1.70471	1.02198	0.83658	1.274
0.9633	0.76606	1.06162	0.83463	1.11227	0.96149	0.74583	0.6736	0.66649	0.85594	1.37073
0.98586	0.79293	1.25156	0.89348	0.83185	1.02879	0.96854	1.0877	0.84692	0.68971	1.01799
1.011	0.88173	0.9791	0.74338	1.08904	1.17812	0.32201	0.83324	0.99774	0.90749	1.0857
1.05066	0.88929	0.95566	0.9809	0.93073	1.13323	0.76219	0.82438	0.73956	0.64274	0.88057
0.90678	0.95966	0.98995	0.9764	0.87943	1.09756	1.00512	0.922	0.77669	0.71433	1.57758
1.08677	1.19203	1.04468	0.84158	0.95682	1.05988	0.73297	0.86702	0.85784	0.84283	1.01671
0.96602	0.80711	1.15995	1.07557	0.90332	0.85967	0.81874	0.83911	0.46242	0.87195	1.15065
0.65207	0.88558	1.15955	0.75593	0.91035	1.08837	0.84276	0.97633	0.89179	0.58317	0.83997
1.01797	1.01395	0.92584	0.37194	1.11003	0.82363	0.79842	0.67281	0.75653	1.68039	1.30489
0.84829	0.88378	1.1922	0.79391	0.96568	1.06474	0.80111	0.89179	0.93639	1.21397	0.94108
1.07563	0.5179	1.2233	0.85699	1.42123	1.18621	0.79686	1.42161	0.94766	1.15239	1.28577
0.83253	1.14087	1.02798	0.66679	0.93329	1.05868	0.66947	0.80411	0.69852	0.38692	1.16276
0.91947	1.08376	0.57838	0.95946	0.81463	1.06777	0.88561	0.83753	0.78352	0.8875	1.38443
1.07341	0.98417	0.95056	2.03473	1.06257	1.09749	0.77415	0.77112	0.6192	0.98543	1.07654
0.81273	0.74911	1.13697	0.88184	0.98291	1.11961	0.68022	0.87945	0.71827	0.714	1.39298
0.44795	0.94666	0.97179	0.80074	0.43305	0.95505	0.95101	0.90918	1.11151	0.74846	0.77912
1.04698	0.76962	0.84599	0.99544	0.7916	0.59073	0.83053	1.02272	0.83755	0.3083	1.37099
0.7835	0.9164	1.15054	0.83467	1.07094	1.13596	0.84046	0.82846	0.96463	0.78022	0.74528
0.97928	0.85844	0.90351	0.94178	1.09389	1.17261	0.9468	0.62531	0.57178	0.68225	0.89244
1.26427	1.02356	0.98689	1.01084	0.78445	0.84128	0.64625	0.81713	0.82118	0.46568	1.04703
1.09565	0.97932	1.03159	1.01401	0.92276	1.00541	0.88899	0.97569	0.8979	0.85445	1.32254
1.03234	1.04069	0.32312	1.02217	4.42365	1.15573	0.99653	0.91677	0.69284	0.63627	1.07079
1.00199	0.97798	0.88631	0.81521	0.71697	0.46797	0.70519	0.91001	0.42359	0.43233	0.97212
0.93042	0.85699	1.01212	0.60229	0.90916	1.01775	0.66591	1.15152	1.22214	0.56326	0.88909
0.95475	0.87759	1.05557	0.85814	0.87233	1.06277	0.51191	0.69646	2.35197	0.63749	0.93857
0.97454	0.7076	0.84675	0.86144	0.99248	1.03319	0.67325	0.72666	0.85779	0.97908	1.2617
0.80536	0.96369	1.10846	1.10991	1.24586	0.84942	0.86449	0.90213	0.75948	0.51947	1.62476
1.18514	0.98998	0.97886	0.91006	1.11814	1.14881	1.07233	0.98367	0.64868	1.31245	1.07652
0.99833	0.93569	1.09862	0.82996	0.6601	0.50291	1.02071	0.81878	1.30611	0.78075	1.15741
0.90792	0.64885	1.12236	1.0355	0.82923	1.06778	0.6675	0.68024	1.04255	0.70743	1.38992
1.10184	1.16782	1.03561	0.88918	0.91896	1.02796	0.75676	0.85405	0.80888	0.5625	1.34586
1.20107	0.82782	0.89631	1.08942	0.64706	1.08179	0.77561	0.92285	0.92035	0.94212	1.06716
0.98319	0.75871	0.69081	1.00376	0.94385	1.05186	0.89194	0.71634	0.7344	0.6235	1.30875
0.93418	1.02454	0.93919	1.2067	0.81998	1.12591	1.1674	0.95632	0.59467	0.62129	1.35315
1.08287	1.19933	0.97809	1.08757	0.93535	1.15896	0.89206	1.03301	0.57044	1.01016	0.56688
1.00949	1.00407	0.80019	0.94152	0.88146	1.08872	1.22285	0.93518	1.01594	0.98531	1.65534
0.88421	0.61377	0.92422	0.9689	0.99504	0.89082	0.89798	0.53637	0.87308	0.96092	0.9273
1.08782	0.83283	0.99721	0.935	0.92229	1.17296	0.75008	0.78272	0.69113	0.84192	0.4673
1.25142	0.8095	0.94638	0.72767	0.89104	1.03757	0.84676	0.93849	0.86648	0.70776	1.52111
1.12124	0.90085	1.02947	0.98628	0.91629	1.1987	0.75158	0.96956	0.94535	0.47942	1.5848
0.99487	0.78344	1.09437	0.99172	1.05763	0.84778	0.81691	0.98636	0.90142	0.98435	1.54262
0.86486	0.96092	0.99257	0.94078	0.68091	0.95456	1.00324	0.82505	0.9197	0.47628	0.61169
0.94725	0.97126	0.97174	1.00636	0.80313	1.08217	0.89568	1.00082	0.92005	1.06091	1.27486
1.03202	0.63513	1.01675	0.83745	0.94991	1.01768	0.87348	0.67632	0.89734	0.59113	1.25833
0.5373	0.64866	0.94076	0.78941	1.18397	1.36592	1.04614	0.85838	2.39257	0.92787	1.26548
0.85577	1.07276	0.9987	1.40307	0.92572	1.02784	0.653	0.62802	1.67914	0.57005	0.97439
0.97285	1.10568	1.04607	1.0978	0.90094	1.20478	0.8627	1.13988	0.71555	0.66145	1.39175
1.07029	0.89961	0.73269	0.91909	0.92372	1.07907	0.71751	0.86193	0.82643	0.82951	1.43676
0.9888	0.94209	0.97795	1.00414	0.8539	0.87402	0.79703	1.79232	0.81482	0.75765	0.85493
1.02033	1.28368	1.15879	1.21536	0.76232	1.11764	0.93304	1.34958	0.58348	1.41816	1.12464
0.95412	0.93906	1.1719	0.94759	0.95401	0.9664	0.84119	0.99186	0.54915	0.80856	1.21799
1.01729	0.87867	1.15677	1.07256	1.09889	1.09183	0.90969	1.04875	0.80863	0.89326	1.12126
1.08097	0.88739	1.12802	0.88676	0.72386	0.65068	0.70576	0.7066	1.42295	1.07559	0.90012
1.13861	1.25985	1.5226	0.93651	0.62752	1.23502	0.96049	0.86557	0.90488	0.66746	0.55721
0.78252	0.85636	1.12866	1.10099	1.04204	0.99482	0.75018	0.85307	1.01383	0.71523	1.34381
0.85082	1.17335	1.1338	1.08963	0.92566	1.32796	0.69384	0.39819	0.60547	1.04636	0.89083
0.99187	0.9772	2.27084	0.85809	0.81884	1.20018	0.87427	1.2663	0.72161	0.64728	1.44508
1.01553	0.89434	0.89626	0.91185	1.12143	0.99574	0.57517	0.97209	0.95839	0.53262	1.19097
1.04033	0.96481	0.97257	0.66863	0.9886	0.903	0.80826	0.74085	0.38803	1.2484	1.13612
1.0414	0.81449	1.07019	0.92488	0.95716	1.29181	0.79924	0.96394	0.75975	0.82347	0.91905
0.9408	1.02553	0.83986	0.87652	1.09282	1.21816	0.94689	0.93895	0.86834	0.86953	0.68991
0.88273	0.87643	1.00214	0.78011	0.74513	1.16917	0.86896	0.70828	0.95776	0.85379	1.19298
0.92213	0.91	1.12019	0.89203	0.82079	1.07613	0.68599	0.50129	0.81497	0.78571	1.1732
1.01405	1.78201	0.98146	0.76784	1.09159	1.00666	0.91688	0.95455	0.84262	0.59191	1.73842
0.78723	0.85075	0.98641	0.90569	1.06586	1.09115	0.94715	0.74317	0.84883	0.64738	1.34613
0.57249	1.74072	0.8612	0.9228	1.00842	3.52574	0.98676	0.97369	0.50426	0.18164	2.98391
0.91925	0.95872	1.11383	0.59165	0.64923	1.08433	0.91375	0.67257	0.70411	0.49262	0.83523
0.80328	0.90061	1.10983	0.96911	0.6588	0.89939	0.81402	0.97475	0.8687	0.44691	1.13038
0.85713	0.98845	1.21512	1.21412	0.97906	1.10492	0.892	1.01402	0.70026	0.51585	1.35537
0.95268	0.95517	1.12034	0.86333	0.9518	1.10166	0.96816	0.95859	0.88419	0.83953	1.22319
1.0138	0.70679	1.14038	1.05866	0.82447	0.93009	0.9137	0.82028	0.97724	0.5838	1.12274
1.14853	0.99528	1.02872	0.64961	0.98972	0.79434	1.02456	1.00295	0.63846	0.75612	1.24265
1.13707	1.04977	1.09369	0.93017	1.03064	0.84978	1.05082	0.58416	0.87945	0.77837	2.1938
1.10061	1.0263	0.99995	0.90997	0.89689	0.99084	0.86176	0.94467	0.53186	0.67502	1.08874
1.01027	0.833	1.02425	1.05808	1.05215	0.69265	0.68951	1.01525	1.0577	0.7542	1.02047
1.18217	0.99249	0.78091	0.66195	0.92529	1.74553	0.70172	0.92019	0.63692	0.8698	1.30272
0.68632	0.78954	1.10906	0.80125	0.99856	0.7326	0.77	1.01802	1.01988	0.85683	1.25855
1.10768	0.87082	1.18765	1.3368	1.09509	0.87133	0.86006	0.90254	0.97138	0.60102	0.95476
1.03703	0.98641	1.14506	0.99335	1.11226	1.22915	0.96725	0.90023	0.74787	0.89851	1.03009
0.9827	0.96006	1.02376	0.90688	0.89178	1.12032	0.89967	0.78311	0.83754	0.59047	1.47101
1.02207	0.89538	1.01717	0.94189	0.85936	1.01176	0.76684	0.83166	0.77775	0.76175	1.03958
1.07715	0.54023	1.05777	1.06496	0.74623	1.3633	0.48759	0.93869	0.95762	0.86183	1.31113
1.07345	0.90872	0.91458	0.89717	0.68768	0.81891	0.7266	0.93131	0.54378	0.61753	1.36609
0.85075	0.97637	1.23473	0.98845	0.8374	1.21337	0.86891	0.79276	1.02622	0.75687	1.0324
1.07849	0.8881	0.80906	0.88848	0.94281	1.70274	0.61504	1.02848	0.96218	0.61243	1.02092
1.113	1.00541	1.10287	1.04455	0.79063	0.97781	1.00758	0.94684	0.86235	0.66621	3.18664
1.03425	0.59317	1.03281	0.9757	1.07354	0.69977	0.93139	0.89532	0.74721	0.62585	1.42281
0.9733	0.93401	1.05676	0.96942	0.94387	0.63731	1.0532	0.49709	0.78986	0.86262	1.235
0.87229	0.98826	1.09848	0.99006	0.90199	1.14147	0.75881	0.93202	0.67883	0.57368	0.92602
1.01076	1.01236	0.94091	0.90717	0.93987	1.09789	0.80017	0.95936	1.11974	0.72097	1.06984
0.65161	0.91341	1.03565	2.39911	0.9033	1.73718	0.65375	0.80483	0.97289	0.37557	0.82592
1.0426	0.91848	0.74409	0.7301	0.6401	0.53215	0.79508	0.45578	0.84181	0.84538	1.14138
0.88888	0.9539	0.8527	0.87447	0.99921	1.0635	0.58561	0.60321	0.65102	0.56319	0.87874
0.96382	1.04572	1.08264	0.90616	0.97917	0.65526	0.61635	0.99745	0.69136	0.98391	1.12935
0.73358	0.81172	0.93671	0.653	0.86675	1.16673	0.9643	0.96313	0.93735	0.86567	1.07838
0.87088	0.94933	0.91461	0.92123	1.12008	0.817	0.82049	0.72496	0.84491	0.8265	1.27107
1.21828	1.1471	0.93055	0.79988	0.95009	1.14883	0.48553	0.91261	1.12532	0.85884	0.82942
1.00682	0.79559	1.36818	0.81058	1.03399	1.20465	0.75221	0.72229	0.67252	0.72734	0.89617
1.05735	0.8997	0.89881	0.77073	1.10192	0.78693	0.8827	0.9643	0.93283	0.8436	1.11984
0.93495	0.89356	0.73437	1.00244	1.07159	0.99363	0.72512	0.99019	0.82039	0.87386	1.0101
1.0531	1.02714	1.02197	1.11311	0.97965	1.18016	0.8762	0.95454	0.85041	0.71673	0.95491
0.6942	1.05185	1.05798	1.01816	1.10686	0.93969	0.95796	0.84198	0.89974	0.46558	1.21109
0.98535	0.89865	1.19693	1.12272	0.71908	1.11088	0.93514	0.69411	0.90763	0.91332	1.52737
1.01093	0.85722	1.05582	0.86815	1.18316	1.2775	0.89007	0.95085	0.9639	0.58832	1.11886
0.92051	0.79135	1.05667	0.95717	0.97425	0.7874	0.9551	0.82153	0.98014	0.90525	0.69087
0.99588	0.97074	0.91566	0.97038	0.6301	0.57362	0.84424	0.93794	0.95817	0.83744	1.48788
0.96709	0.99919	1.06919	0.89932	1.11264	1.24811	0.39156	0.59114	0.74814	0.64135	2.04464
1.00901	0.98521	1.08904	0.94103	0.75486	0.97411	0.9511	1.06946	0.57671	0.66837	1.37258
1.00028	1.35395	0.85946	0.69074	0.99062	1.28015	0.91942	0.83834	1.04211	0.26709	1.41803
0.92851	0.99172	1.01455	0.91954	0.74268	1.07107	0.93966	0.91044	0.90643	0.23608	0.93189
0.65368	1.02555	0.90994	0.89292	1.09315	0.98557	0.66214	0.83118	0.67741	0.69116	1.5718
1.09535	1.03801	0.83552	1.0301	0.94202	0.8867	0.85461	0.74501	0.711	0.59715	1.18449
1.28544	0.77869	1.09738	1.06267	1.13218	1.05323	0.88414	0.79518	0.86216	0.77972	1.40946
0.83305	0.89712	1.00934	1.16816	0.80721	1.15777	0.86986	0.98076	0.78925	0.7612	0.95834
1.10069	0.87401	1.37097	0.85867	0.94559	1.0226	0.84977	0.56758	0.74096	0.82225	1.01136
0.9124	0.90547	0.93635	1.04261	0.69356	0.94092	1.02683	1.04247	0.93964	0.54853	0.74284
0.91226	1.05079	0.93633	0.91048	0.92767	0.96261	0.89647	0.41499	0.91659	0.70235	1.44767
1.0607	1.05974	0.91395	0.9956	1.04973	1.05131	1.01947	0.74018	0.94549	0.79379	1.0448
0.8497	0.92776	1.32932	0.56336	0.85797	1.06391	0.82951	0.87272	0.72877	0.70578	1.11998
1.07278	1.00112	1.0998	1.08496	1.0871	0.98931	0.79739	0.59229	0.6779	0.85352	1.20754
0.87039	0.53663	1.03586	0.9551	0.97278	0.99872	0.99789	0.9871	0.99732	0.65099	1.56974
1.22287	0.79686	1.02507	0.90223	0.8311	1.35317	0.93176	0.9371	0.8072	0.72558	0.84158
0.87731	0.47814	1.06394	0.90841	0.54353	0.73202	0.87573	1.01305	0.68542	0.53302	0.52043
1.10291	1.0488	1.00308	0.8364	0.84488	1.36595	0.68772	0.90855	0.77659	0.56138	0.74338
1.04945	0.84974	1.10383	0.44346	0.71303	0.92399	0.73001	0.81749	1.87273	0.73192	1.01426
1.04111	0.65534	1.39517	0.99248	0.91672	0.64747	0.81486	0.79412	1.02097	0.50081	0.90858
0.57138	0.82368	0.88156	0.84858	0.98362	1.06334	0.59101	0.619	0.8185	0.57975	0.95814
1.24068	0.94084	0.92566	0.99838	0.80854	3.14921	0.7736	0.71496	0.73451	1.00657	1.77157
0.98517	0.91401	1.03142	0.96637	1.06889	1.08613	0.66406	0.97483	0.75464	1.02719	0.60767
1.03051	0.88137	0.96822	0.92595	1.11997	1.06918	0.74602	0.79306	0.4364	0.79074	1.23804
0.86031	0.94077	1.11802	1.02468	1.1128	0.94689	0.83837	0.66417	1.07793	1.33853	1.87294
1.05983	1.17143	0.99881	0.90533	1.08004	0.76489	0.85633	1.07778	1.01885	0.77804	1.11368
1.08136	0.85623	1.07945	0.9761	0.87549	1.01236	0.8537	0.96997	0.96681	0.26431	1.31835
3.4674	1.08762	1.01016	1.13811	0.8101	0.50453	1.01509	0.73183	0.69176	0.86315	1.38231
0.97098	0.62078	0.86881	0.7969	0.93437	1.03786	0.92589	0.80109	0.66151	0.71345	1.37582
0.96274	0.96135	1.20881	1.11409	0.68087	0.77876	0.6329	0.94811	0.85692	0.68722	1.09726
1.28876	0.96227	0.9888	0.78122	1.03559	1.19036	0.80613	0.85606	0.93409	0.85729	0.77282
0.93215	0.58219	1.04531	0.93053	0.55526	0.66612	0.82943	0.93038	0.64407	0.72926	0.98433
1.13178	1.17573	0.9913	4.25832	0.74659	2.67346	0.7423	0.71215	1.05219	0.61722	1.18098
1.19766	0.9258	1.68465	0.88517	0.86985	1.11545	0.74055	0.93665	0.4351	0.6225	1.27701
1.10272	0.61839	1.02246	1.04999	1.21876	1.09254	0.79305	0.69361	1.1	0.83845	1.18625
1.10237	0.85411	1.09138	1.54579	0.73054	1.16386	1.03223	0.9092	0.88324	0.59213	1.00327
0.85066	1.07597	1.08993	0.98745	1.18144	0.98167	0.86181	1.03641	0.84056	0.47599	1.47603
1.16121	0.94914	1.0801	0.89058	0.96006	0.99587	0.82035	0.94286	0.94336	0.82303	0.83901
1.13663	0.87633	1.05635	1.02956	1.01622	0.93833	1.01567	0.52381	1.01405	0.73575	1.19381
1.0724	0.94261	1.19398	0.82591	1.0991	0.98992	0.94184	1.19974	0.83353	1.13771	1.65343
1.09958	0.96212	1.02442	1.06305	1.05155	1.22099	0.86773	0.9348	0.83456	0.60475	1.42171
0.99736	0.57115	1.00308	0.87313	0.9426	1.15438	0.78833	1.02942	0.84153	1.41268	1.02505
0.94268	0.78312	1.3332	1.05803	0.83689	1.06906	0.87678	0.77084	0.82682	1.10724	1.06873
1.03501	0.71446	0.95679	0.98943	0.80212	1.05315	0.73506	1.27537	0.90257	0.94954	0.8073
1.27902	0.77879	0.80999	1.05898	1.09904	1.07624	0.77774	0.89265	0.91592	0.69387	1.67066
0.9772	0.83504	1.01476	1.31625	0.69427	1.02456	0.93287	1.02855	0.83731	0.89538	0.8124
0.9837	0.78567	2.18086	0.98275	0.88391	2.21001	0.84004	0.58847	0.63344	0.67251	0.96546
0.80814	0.98379	0.91527	1.1258	1.07481	0.77333	0.78604	0.80821	0.81277	0.9548	0.88943
0.9282	0.67676	1.3418	1.05171	0.64277	1.06329	0.80292	0.9343	0.66405	0.62286	1.04936
1.07578	0.85539	1.14564	0.86892	1.18005	0.95293	0.46575	0.97199	0.79529	0.94103	1.21102
1.0824	0.97765	1.13269	1.0179	0.61572	0.89987	1.09983	0.26961	0.83995	0.44666	1.76427
1.01799	1.11931	0.78523	1.08956	0.66285	1.07399	0.68029	1.41765	0.75557	0.83182	1.09969
1.23795	1.0236	1.02579	1.01245	0.94681	1.05675	0.85435	0.78226	0.50623	0.87953	1.04502
0.69341	0.98703	0.85164	0.94359	0.88234	0.88349	0.78746	1.08514	0.74891	0.53696	1.24471
0.14013	0.92799	0.73142	1.048	1.03993	1.53532	0.63531	0.6868	0.89414	0.75138	1.05928
0.69106	0.88785	1.0008	1.04591	0.79822	0.86948	0.5491	0.77271	0.90222	0.70649	0.97773
0.86993	1.17887	1.13257	0.62693	0.85684	1.17572	0.81287	1.18215	1.00833	0.61447	0.94519
1.15802	0.86804	1.04401	0.81848	1.09041	1.24221	0.59837	0.70917	0.58803	0.90932	0.68704
0.98502	0.94481	1.15867	0.73584	0.98091	1.13603	0.48728	0.79188	1.04752	0.7289	1.11209
0.93994	0.89717	1.0479	0.78836	1.42992	1.17856	0.82318	0.78599	0.97533	0.79139	1.11026
0.71023	0.78682	1.03127	0.96673	0.89751	1.25093	0.62877	0.95347	1.05191	1.0678	1.25795
1.21868	0.92614	0.83783	0.96391	0.90618	1.3263	0.87924	0.64072	0.83455	0.76403	2.73079
0.83045	0.99042	1.10236	3.55521	0.89892	0.79705	0.78028	0.98888	0.63969	0.32328	1.21448
0.61405	0.9448	1.05827	0.98259	0.97913	1.15645	1.04218	0.78995	0.89482	0.67801	1.03889
0.90675	0.84205	0.9347	0.71157	0.87839	0.91644	0.92918	0.95097	0.53525	0.61361	1.36517
0.52491	0.77922	0.99315	0.96157	0.91653	0.95695	0.70947	1.18099	0.84499	0.72038	0.9291
0.77079	0.89987	1.18401	0.99157	0.9856	1.23136	0.78108	0.74964	0.82218	0.36577	0.95366
1.08096	0.88181	1.0776	0.86707	0.77632	1.03105	0.91336	1.02247	1.01919	0.70823	1.17008
1.11601	0.9779	0.98269	0.92827	0.97916	1.10661	0.74171	2.82674	0.78739	0.4436	1.08875
1.04724	1.07749	1.08814	0.68957	0.71211	1.15091	0.88906	0.55857	0.84467	0.93302	1.63751
1.02434	0.75733	1.04427	1.07471	0.83396	1.37047	0.97725	0.91519	0.84074	0.75157	1.21382
0.82212	0.91681	0.75597	0.84199	0.97106	0.70939	0.58236	0.98338	0.81109	1.04616	1.15604
0.97826	0.88814	1.09365	0.99241	1.0811	1.07837	0.7833	0.81245	0.95632	0.77664	1.39383
1.03969	0.4776	1.04454	0.86537	1.00189	0.80112	0.80844	0.99442	0.77127	1.11462	1.29352
0.93271	0.89168	1.03093	0.99149	0.99709	1.01088	0.55151	0.80696	0.62578	0.73425	0.67363
1.03123	0.88842	1.09235	1.11886	1.10848	0.85516	0.85575	0.8346	0.91437	1.11925	1.23041
1.07121	0.57121	1.05641	0.85891	1.05963	0.96214	0.65955	0.54236	0.68331	0.61963	0.95326
1.01884	0.64742	1.15596	0.9417	0.87716	1.17159	0.71126	0.73798	0.46408	0.3686	0.60691
0.92151	0.78979	1.16462	1.036	0.67732	0.92311	0.42369	1.21062	0.70762	0.53504	2.43783
0.89032	0.81032	0.98305	0.80813	0.89189	1.30943	0.86329	0.91129	0.82959	0.63848	1.37301
0.78021	0.99502	1.09683	1.0333	1.18404	1.11939	0.90013	1.13952	0.95221	0.78	1.14669
0.70956	0.95802	0.92573	1.05495	0.85202	1.02518	0.64415	1.14037	1.00613	0.84194	1.24945
1.09642	0.96673	1.09966	0.97698	0.97749	0.97634	0.64972	0.91628	0.9071	1.22189	1.33438
0.97635	0.95055	0.4705	1.04235	0.38346	0.99577	0.92309	0.89509	0.85027	1.16716	0.70851
1.68383	0.92167	1.01154	1.06799	1.48748	0.94882	0.91908	0.96961	0.84956	0.52991	1.02455
1.10875	0.98394	1.00561	0.75794	0.72639	1.05307	0.8419	0.94898	1.02349	0.63426	1.20924
0.90261	0.71335	1.17008	0.83362	1.10592	0.9363	0.77463	0.865	0.76136	0.69075	0.91357
0.97688	0.86643	1.07112	0.87746	0.80589	0.9819	0.69928	1.0425	0.83475	0.52558	1.3111
0.83483	0.70913	1.06971	0.95941	0.99919	1.1319	0.92297	0.82602	1.13164	0.76017	0.67166
0.93038	0.89762	0.99823	1.00786	0.98353	0.99396	0.79704	0.96666	0.86546	0.55605	1.06452
0.91815	0.84573	1.3485	0.98892	0.90606	0.95565	0.88197	0.69848	1.02628	0.44405	0.94922
1.03115	0.88607	0.99018	0.94833	0.83772	1.02533	0.55615	0.63219	1.40573	0.54199	1.44503
1.1294	0.82014	1.04583	0.64786	0.93264	1.28752	0.85914	0.94757	1.07883	0.6746	0.9561
0.76323	0.75478	1.0045	1.05206	0.76514	1.05726	0.70841	0.66763	1.24377	0.47136	1.22583
1.06162	0.66317	1.04126	0.99075	0.92702	1.16929	0.92558	0.80807	0.8452	0.76248	1.03388
1.12101	0.90196	0.89109	1.16694	0.96931	0.73366	0.85533	1.15424	0.46179	0.8388	1.05894
1.21097	0.65149	0.90582	1.55271	0.75768	0.92788	0.67611	0.89603	0.88873	0.47311	1.06304
0.92785	0.98155	1.03727	0.93263	0.88743	0.78636	0.54815	0.92366	0.73525	1.23816	1.11946
1.06788	0.97169	1.10652	0.96226	0.83895	0.97045	0.69239	0.87475	0.9922	0.59508	1.37147
0.96484	1.04518	0.98545	0.78214	1.04737	1.0976	0.54945	1.25056	0.86871	0.4163	1.33443
1.19388	0.71077	1.04736	0.92378	0.75061	1.1102	0.66953	0.72268	1.21325	1.23759	1.03814
0.94615	0.70174	2.29795	1.26475	0.80718	0.91496	0.71708	0.88988	0.71278	0.63269	1.26937
0.86083	0.71604	1.12013	1.10816	0.62106	1.12362	0.80256	1.0432	1.06406	0.45093	1.1863
1.06624	0.8665	1.04044	0.87556	1.18111	1.36857	0.87529	0.89712	0.87095	0.74011	0.97547
0.84663	0.86071	1.01683	0.85916	0.73583	1.14375	0.86469	0.80684	0.87363	0.72934	1.5663
0.74992	0.86605	1.07788	1.15154	1.01725	1.07344	0.82391	0.86833	0.89398	0.8201	1.81297
0.86128	4.47872	0.97343	0.91658	0.92813	0.86297	0.98968	0.80372	0.87791	0.60291	0.8204
1.13045	1.24053	0.79599	1.11431	1.02146	0.80728	0.65296	1.03195	1.08917	0.73492	1.025
1.24802	1.05951	1.12033	0.9044	1.01567	1.1914	0.89087	0.99458	0.85187	0.61797	1.34213
0.54615	1.26579	1.01431	0.97695	0.85187	1.09592	0.95196	1.12452	0.83713	0.5695	0.68382
1.04857	0.95732	1.09548	0.86388	1.16278	1.08515	0.71481	0.7192	0.80404	0.71416	0.98631
1.08471	1.03437	1.0365	0.9066	1.0989	1.01411	0.77431	0.70878	1.67494	0.77761	1.07459
0.98837	1.17982	1.0523	0.50737	1.19002	1.41277	0.95871	0.70775	0.74547	0.82516	1.28087
1.21304	0.67229	0.96439	0.74679	0.22446	1.04836	0.73153	0.56654	0.85879	0.80477	0.66243
1.11715	0.97231	1.14623	1.01081	0.84453	1.02744	0.99086	1.15061	0.79404	0.80016	0.9468
0.6573	0.79703	1.05368	0.95906	0.63551	1.02174	0.87589	0.6897	0.96858	0.99027	1.03859
1.12185	0.89863	1.10901	1.11429	0.99258	0.94914	0.78631	0.84546	0.79231	0.53812	1.06746
0.63614	0.71177	0.81358	0.87987	0.6203	3.39742	0.94043	0.9318	1.02219	0.86298	1.23634
0.39451	1.01747	0.872	0.82222	0.94213	1.36195	0.93097	0.83818	0.53074	0.54578	1.05491
1.13681	0.98044	0.97484	0.78267	1.02864	0.89408	0.87723	0.64809	0.79469	1.14232	0.88461
1.27071	0.82926	1.26812	0.60238	1.00705	1.2401	0.65251	0.91145	0.75135	1.01245	0.90089
0.98358	0.7885	1.05786	1.06161	0.96058	1.16292	0.72445	0.71212	1.00907	0.70758	0.93776
1.01734	0.60337	0.8834	1.04531	1.01552	0.51036	0.58394	0.87713	0.80471	0.95455	0.98688
1.18998	0.65711	1.04671	1.05911	0.72662	1.04359	0.87785	0.62637	0.8909	0.44172	1.40725
0.5025	1.08993	1.05893	1.02333	1.22211	1.17917	0.74054	0.29107	0.84819	0.33543	1.16944
1.12452	0.72537	0.98869	1.17262	0.60873	0.87951	0.85898	0.98838	0.62867	0.94935	1.21483
0.98876	0.65986	1.19244	0.98233	0.82491	0.82203	0.84584	1.1451	0.86713	0.61306	1.12607
1.04157	0.73743	1.01332	0.83249	0.82693	0.78378	0.90506	0.48312	1.01024	0.81591	1.08
1.0888	1.05843	1.17191	1.22345	0.9575	2.38358	0.60568	0.88157	0.82837	0.90752	1.25212
0.32912	1.08704	1.16658	1.00932	0.8594	0.88117	0.96002	0.82667	1.10113	0.79999	1.36198
0.90255	0.85453	1.08444	0.89665	0.92015	0.82456	0.72537	0.67619	0.90562	0.74338	1.17099
0.604	0.90272	0.96816	1.19409	0.90576	1.12463	0.87257	1.47154	0.78464	0.38779	1.66844
1.27883	0.90403	0.94105	0.6973	1.16784	0.93079	0.74075	0.89955	0.58794	0.736	0.91589
0.96232	0.92225	0.86094	0.74524	0.99497	0.97085	0.58305	0.86287	0.96199	0.80893	1.12388
1.10785	0.90594	0.86141	0.90932	0.98152	0.95275	0.83185	0.86685	0.97238	1.05976	1.44593
1.12629	0.98057	0.8791	0.91584	0.25672	1.06062	0.80874	0.87959	0.76014	0.47782	1.15484
1.07455	0.89957	1.00389	1.14648	0.64154	1.03583	0.85745	0.88851	0.5333	0.37448	1.35901
0.96003	0.95279	1.30065	0.9051	1.08479	0.70483	0.80931	0.58314	0.92264	0.74834	0.89064
0.97247	0.95205	0.81258	0.7884	0.97654	1.18763	0.62421	0.84536	0.93684	0.89253	1.01804
0.99089	0.911	0.6345	0.84156	0.88893	1.00807	0.65428	1.00055	1.00954	0.3992	1.36178
0.95685	1.01651	1.09456	1.04944	0.54142	1.12222	0.98091	0.70413	0.61239	0.63144	1.14203
1.05039	0.93876	1.02708	0.73486	1.12584	1.07191	0.9457	0.85923	0.96682	1.13729	1.16361
0.88773	0.79544	1.16369	0.75822	0.9626	0.84917	0.86856	0.87577	0.83686	1.07373	1.15142
0.92328	0.85862	1.15829	1.01391	1.0312	0.83953	0.77909	0.38728	0.647	0.60141	2.58406
1.03886	1.05026	0.91569	0.92547	1.02775	0.59859	0.84394	0.73662	0.72011	0.81149	0.69387
1.04336	0.88932	1.11194	1.04096	0.99075	0.97324	0.76497	0.8067	0.73051	0.84758	1.23154
1.04671	0.98787	1.06501	0.81421	1.10019	1.00956	0.71531	0.94377	0.98122	0.90838	1.37194
0.96831	0.72802	0.9722	0.93501	0.96203	1.00309	0.60514	0.90196	1.40304	0.6616	0.96034
1.08351	1.04571	1.19058	0.92982	1.10991	0.82371	0.56438	0.83786	0.96377	0.88058	0.99787
1.02753	0.98474	1.14549	1.15279	0.97699	0.82171	0.67198	1.04435	0.93778	0.86338	2.64518
1.05289	0.74258	1.13731	0.76691	0.81251	1.00687	0.74215	1.01682	0.99229	0.83342	1.06811
1.03472	0.8545	1.07904	0.94747	0.99542	1.29894	0.7635	1.31267	0.66147	0.47549	1.086
0.7834	0.8889	1.11539	0.73402	0.91144	0.80785	0.92711	0.80124	0.32314	0.48819	0.54672
0.96548	1.03139	1.09532	1.04879	0.87079	1.08788	0.71141	0.95366	0.64333	0.89889	1.10439
1.01418	0.92105	1.03392	1.14306	0.76284	1.05237	0.72685	0.75663	0.4671	0.79438	1.09267
1.12317	0.60741	0.66131	1.09423	0.88097	1.19461	0.80442	0.39237	0.77556	0.72963	1.03316
0.67517	0.84449	1.15956	0.79482	0.98914	1.027	1.0405	0.90593	0.7078	0.74496	1.95183
0.95231	0.59936	1.15447	0.8624	1.01097	1.1106	0.8895	1.13796	0.93958	0.68004	0.58142
0.96197	0.90164	1.76282	0.77411	0.444	0.91511	0.80753	0.60569	1.01095	0.6746	1.208
1.12911	0.89863	1.00155	1.0145	1.06681	1.24532	0.88589	1.06742	0.7489	1.00671	1.13681
1.16824	0.90172	1.03921	0.90879	0.96885	0.94929	0.89472	0.71401	1.07474	0.73473	1.24217
0.97265	0.81756	1.60373	1.46596	0.84882	0.58718	0.83705	0.98871	0.67789	0.67839	1.08267
1.10925	0.36794	1.09321	1.06391	0.66636	0.95636	0.61884	0.49981	0.73594	0.79565	1.27572
0.72155	1.05359	0.4846	0.97166	0.99276	0.90135	0.84139	0.87727	0.7644	0.71227	1.08642
0.88756	1.37438	0.92422	0.45932	0.85453	0.73135	0.89773	0.79798	0.89824	0.86019	1.41071
0.98292	0.8908	1.07252	0.97888	0.89378	0.97769	0.88969	0.99136	0.78697	0.84112	0.77263
0.75003	0.97446	0.98287	0.92558	0.95435	0.96451	0.94758	0.99446	0.77314	0.6243	0.64505
1.09712	0.89169	1.07904	0.97896	1.05889	0.91639	0.85812	1.02349	0.98431	0.87578	0.91749
1.16812	0.89603	1.15049	0.71399	1.0354	1.18469	0.80501	1.05429	0.9458	0.59031	1.06377
0.86271	0.7933	1.2026	1.09868	0.76875	1.05321	0.75375	0.9613	0.63055	0.43767	0.99267
0.74218	0.9147	0.41736	1.06825	0.87967	1.1216	0.94188	0.98795	0.78365	0.5134	0.79793
1.17801	1.03106	0.69575	1.05974	0.64385	1.13584	0.85402	1.04046	0.83558	1.50872	1.06387
0.90285	0.57721	0.80345	1.12501	1.01665	0.97464	0.89312	1.32085	0.6522	0.68868	0.82464
1.05473	0.83448	1.05881	0.92734	0.81816	0.99438	0.73952	0.67812	1.10086	0.7931	1.53137
0.99007	0.84877	1.18079	1.05956	1.02699	1.00498	0.67697	0.94818	0.62987	0.89579	1.16606
0.98236	0.81039	1.95987	0.91184	0.79708	1.02756	0.71735	0.85606	0.96583	0.71174	1.03366
1.25724	0.97996	1.20995	0.98123	0.95938	0.87857	0.96674	0.91698	0.67221	0.76048	1.18967
1.12498	0.79483	1.00476	0.86072	1.07188	0.98866	0.7632	0.79455	0.4752	1.07726	1.11008
0.95969	0.89936	1.19662	1.65911	0.88599	1.11136	0.82075	0.93095	0.69287	0.75459	1.33915
1.16008	0.88949	1.08341	0.7924	0.86677	0.93853	0.89726	1.14371	0.49107	0.73214	1.10784
1.25013	1.07198	1.06262	0.925	1.05253	1.34534	0.61172	0.97144	0.86915	1.63575	1.38062
1.14734	0.75311	1.01577	1.00401	1.0228	1.043	0.77815	1.02557	1.06317	0.68874	1.39269
0.69631	1.0483	0.98688	0.83131	0.93748	0.93285	0.82027	0.95956	0.80201	0.63473	1.13592
1.03033	1.0251	0.93507	0.98384	0.89919	0.78357	0.72924	0.98676	0.43592	0.42134	0.85291
1.19708	0.83629	1.04651	0.54343	0.96427	0.84222	0.77189	0.63349	0.88205	0.55717	1.04596
0.76763	0.93612	1.05559	0.63422	0.88121	0.79845	0.92674	1.04134	1.13102	0.7066	1.17411
1.07358	0.9519	1.05105	0.85562	0.88282	0.96039	0.68553	0.90911	0.80647	0.68686	1.07397
0.6002	0.96522	1.02256	0.59513	0.92429	1.04232	1.47006	0.93903	1.12593	0.70094	1.13582
1.00407	0.71982	1.1046	0.87437	0.69838	1.25208	0.80204	0.82373	0.47544	0.99412	1.26764
1.01604	0.75471	1.04381	1.08805	0.91252	0.7803	0.91677	1.01265	1.03559	0.26898	1.26942
1.10774	0.8587	1.4131	0.99464	1.16412	1.08136	0.77191	0.76984	0.84755	0.61415	1.20008
0.99465	1.02454	1.14821	1.10233	1.27703	0.88472	0.96332	0.80953	0.57665	0.36542	1.08903
0.89025	0.86142	1.0115	0.65916	0.95849	0.46734	0.94186	1.25326	0.89629	0.59689	1.26612
0.91889	1.02993	1.05637	0.92538	1.04525	0.80331	0.73511	1.03203	0.9371	1.05264	1.20744
1.17948	0.87582	1.11714	1.30408	1.1038	0.8084	0.96745	1.21537	1.00124	0.85734	1.0811
1.05483	0.69822	1.05579	0.85792	1.03627	0.92198	0.5711	0.95953	0.66027	1.82709	1.33229
1.10662	1.07995	1.0461	0.84117	0.94583	0.9347	0.50252	0.89951	0.96585	0.69032	0.92163
0.87734	1.1455	1.42949	1.06317	0.85096	1.18173	0.8656	1.0419	0.63321	0.94423	1.09741
1.02592	0.99525	0.94838	1.03647	0.89161	0.97895	0.67271	0.89269	1.0279	0.76594	1.20475
0.63423	1.00059	0.97664	1.02414	0.89191	1.12602	0.74184	1.07171	0.59225	0.69772	1.09835
0.86	0.9213	1.19162	0.85021	1.0555	0.98841	0.70465	0.56028	0.38425	0.6694	1.40721
0.68073	0.95116	0.80757	0.95962	1.04715	1.33153	0.9736	0.83544	1.11362	0.44233	1.27802
0.98265	0.93203	1.4837	1.09318	0.93851	1.07008	0.75609	0.97719	0.60769	0.36694	1.00349
1.02395	1.08393	1.03724	0.85624	0.98297	0.92913	0.88078	0.96144	0.98124	0.91574	1.32341
0.95266	0.96751	1.02188	1.05155	0.42114	1.16032	0.71857	0.95958	1.028	0.94757	1.25095
1.08814	0.95611	1.24001	0.76166	0.69057	0.58244	0.85785	0.80559	0.97445	0.82501	1.28895
0.99988	0.68179	1.0718	0.95187	0.7029	0.84745	0.73108	0.92334	0.74812	0.56613	1.2658
1.0809	0.8234	1.13586	0.86358	1.21228	1.41673	0.86893	0.72734	1.07062	0.89969	1.29724
0.61475	0.56733	1.59896	0.84585	0.92219	1.05558	1.0307	0.81861	0.74643	0.43294	1.21191
1.11672	1.05762	0.88548	1.03661	0.70996	0.9797	0.81021	1.13568	1.06696	0.62911	0.63038
0.81031	0.9986	1.10789	0.76559	1.07287	0.89825	0.88821	0.87443	0.526	0.64947	0.97474
1.0604	0.93	1.07109	1.03078	1.0475	0.98453	0.96322	0.75959	1.40088	0.78222	1.38768
0.80624	0.95868	1.07757	0.72132	0.91877	1.85947	0.77234	0.94307	0.92258	0.67724	0.85334
0.80331	0.62866	1.07144	1.12046	0.62068	1.03045	0.69495	1.54545	0.96288	1.04253	1.17377
0.98653	0.94017	1.76204	0.85159	0.94496	1.17631	0.84653	0.85163	0.9697	0.40945	1.02075
1.08738	0.73971	0.87759	0.92279	1.09656	1.17004	0.86858	0.92508	1.04368	0.62045	1.0315
0.98788	0.91472	1.21437	0.99052	1.0694	1.24984	0.90099	0.85723	0.92586	0.62028	1.40324
0.1592	0.80182	1.18802	1.15166	1.15946	0.68711	0.41099	0.97902	0.806	0.8487	1.17468
1.14906	0.8728	0.75307	1.01944	0.99673	0.93712	0.66752	0.9953	0.90293	0.69688	1.09873
1.00114	0.9778	1.12579	0.82731	1.0285	1.13168	1.01095	0.65679	0.85183	0.77739	1.27319
1.02192	2.15189	1.00447	1.45235	0.94894	1.03771	0.84347	0.73747	1.0621	0.82199	0.96486
0.64828	0.99854	1.00392	1.18218	0.95625	1.11888	0.80636	1.04346	0.58561	0.57791	1.3634
1.02652	0.6989	1.91201	0.95901	1.04355	1.1354	0.82828	0.9032	0.90198	0.82688	1.04472
0.85423	0.84575	0.23435	1.14063	0.89861	0.82895	0.86708	0.75614	1.01343	0.91417	1.20984
0.9537	1.01078	1.16973	0.93128	0.9021	1.16998	0.95665	1.07461	1.00321	0.69368	1.15321
1.06036	1.08031	1.27401	0.81694	1.00296	0.84842	0.95093	0.8794	0.64116	0.80361	1.11944
1.0166	1.04297	1.22486	0.83038	1.1038	1.17545	0.68446	0.87422	0.66329	0.79665	1.17425
1.03258	0.95866	1.06684	0.91861	1.0775	1.00585	0.89529	0.91349	0.66877	0.56435	1.46543
1.05779	0.88429	0.91338	0.84212	1.01254	1.13615	0.93222	0.37213	0.8841	0.61876	1.2602
0.94969	0.90571	0.94293	0.25328	1.09423	0.91753	0.86756	0.87504	0.92467	0.62155	1.09859
0.9956	0.82263	1.1062	0.75171	0.44157	0.92845	0.23996	0.92521	0.89815	0.52554	1.10188
0.92647	1.14692	1.09824	0.96812	0.87557	1.12925	0.55498	1.01523	0.25353	0.8234	1.10903
1.16322	1.00229	1.04803	1.19672	1.41507	0.52449	0.60219	0.80991	0.89443	0.82071	1.86355
1.09178	1.04841	0.88449	0.75571	0.9756	1.38639	0.7635	0.9335	0.7135	0.68829	1.07734
0.75844	0.86963	1.03312	0.84304	1.03047	1.10644	1.1395	0.79921	1.0524	0.52974	1.16993
1.08664	0.79089	1.18182	0.89333	1.66234	0.91294	0.86474	0.91859	1.14405	0.61479	0.71698
1.01322	0.72558	0.94537	0.88856	0.9072	0.98135	0.85967	0.76545	0.53928	0.75838	0.52171
0.97429	1.16204	0.89873	0.92229	1.06147	1.03122	0.4835	0.82454	0.37253	0.8706	1.23814
1.05763	0.84505	1.02099	0.75091	1.02872	0.83205	0.97446	0.81134	0.83347	0.8548	0.95907
1.02417	0.96734	0.4547	0.77758	1.01002	0.61556	0.8808	0.75139	0.83033	0.80278	0.64724
0.99617	1.58153	0.98059	1.00207	0.86258	1.13379	0.92216	0.9279	0.80998	0.88253	1.21813
1.07188	0.75701	1.09046	1.10618	1.09853	1.23548	1.08561	1.02787	0.742	0.9183	1.1657
1.03137	0.85137	1.14449	0.67381	0.72134	1.10949	0.82859	0.93916	0.40618	0.96163	1.02214
0.89064	0.92836	1.13253	0.75942	0.93027	0.94036	0.57301	0.64787	0.77241	0.59801	0.98383
1.05298	1.25582	1.0758	0.84325	1.00087	1.09729	0.75122	0.91042	0.94616	0.69409	0.98238
0.86123	0.88252	1.16748	1.00782	0.92677	0.8074	0.72817	0.9116	0.76162	0.81367	1.1731
1.04268	0.99639	1.05427	0.85841	0.84903	0.97791	0.95891	1.20366	1.01021	0.47575	1.25254
1.19149	0.8644	1.13788	0.81762	0.94595	0.74126	0.54374	1.01185	1.01876	0.86431	1.40615
0.81514	1.01065	0.96521	1.06044	0.86912	1.01027	0.74684	0.90092	0.83324	0.54725	0.96083
0.93476	0.82229	1.01883	0.92708	1.14137	0.95087	0.92399	0.76308	0.98163	0.60411	1.47169
0.89651	0.89621	1.00857	1.11535	0.88463	1.10196	0.86306	0.61992	0.92929	0.95237	0.78328
1.15163	0.74632	1.01689	0.86939	0.76932	0.79183	1.05448	0.88359	0.91574	0.72683	1.57438
0.98975	0.94986	0.85157	0.73615	1.08254	1.25347	0.74818	0.99898	0.91454	1.05689	0.94719
0.88099	0.66978	1.03455	1.23714	1.00818	0.89598	0.9292	0.54878	0.54918	0.65371	1.12381
1.01337	1.02795	1.57766	0.67579	1.01528	0.86592	1.01687	0.78952	0.89257	1.04959	1.02294
1.07481	0.85095	1.08298	1.0509	0.96716	0.9776	0.97957	0.75554	0.73797	0.69949	1.61659
0.99233	0.92391	0.92831	0.91454	0.73622	1.13407	0.90415	0.85992	0.92472	0.91642	1.37844
1.04093	1.03424	0.73668	1.1423	1.10633	1.24816	0.74398	0.76215	0.84679	0.88786	1.1767
0.67733	0.78663	1.05686	0.98606	0.94108	0.98185	0.68625	1.10669	0.56534	0.78779	1.04185
0.83002	0.83836	1.05285	1.16787	0.93839	0.62141	0.62039	1.05963	0.89118	0.54523	0.90617
0.73311	1.10505	1.07054	1.0798	0.65451	1.46332	0.92717	0.82463	0.55482	0.86842	0.80049
0.88839	0.85227	1.16948	0.99667	1.07215	1.05826	0.8701	0.98984	0.90226	0.39354	1.19518
0.75636	0.86016	0.93363	1.02073	0.725	1.03714	0.74164	0.93169	0.83611	0.32094	0.76837
0.63411	0.55041	0.90412	1.0664	0.30859	0.99709	0.64008	1.06391	0.86854	0.63943	1.25883
1.10497	0.96811	1.04145	1.00421	0.94971	1.12934	0.60609	0.34988	0.85933	0.75107	0.72264
0.95096	1.26322	1.03829	0.93668	1.1994	0.9038	0.97668	0.86188	0.85665	0.70479	1.30655
1.0043	0.80059	1.14172	0.8298	1.00491	0.74614	0.83598	0.86898	0.96291	0.6677	1.4176
1.08367	0.99246	0.94706	0.70723	1.00251	0.42705	0.97886	0.94339	0.67626	0.86297	1.3012
1.13436	1.27187	1.15104	1.08808	0.88544	0.77646	0.67155	1.0324	0.6871	0.67772	1.21178
1.32612	1.01352	0.92158	1.06076	0.83483	0.64594	0.89355	0.94026	0.95522	0.80431	1.14165
1.00452	0.91806	0.78539	0.99011	1.10306	1.22338	0.86862	1.44162	0.75772	0.78389	1.19973
0.8088	0.28043	1.06165	1.03107	0.96643	1.00461	0.5356	0.88013	0.72841	0.84013	1.20505
1.18436	0.65809	0.53435	0.93266	0.92438	1.09561	0.69917	0.94946	0.88088	0.83711	0.98396
1.21878	0.61225	1.0832	0.86699	0.98242	0.94456	0.80017	0.67674	1.02103	0.71012	0.72961
0.98423	0.84562	0.84986	0.85429	1.08286	1.06363	0.882	0.76387	0.98852	0.72374	1.10913
1.05157	0.88445	0.8855	1.11177	0.82555	1.2401	0.85528	1.13305	0.64374	0.68423	1.07659
1.02815	0.61142	0.97595	0.5115	0.65222	1.44539	0.70206	0.84405	0.74203	0.68903	1.01168
0.83375	0.44675	1.27151	0.77407	1.16948	1.14811	0.89262	0.94978	0.74356	0.34558	0.77934
1.28489	0.87449	0.965	0.8896	0.81752	1.08072	0.58011	0.85037	1.10398	0.67766	0.7885
0.46198	1.20237	0.95412	1.15007	0.93027	1.02845	0.68527	0.76715	0.8138	0.67045	0.85305
1.01954	1.07677	1.05471	0.75822	0.9709	1.09386	0.67365	0.97957	0.71689	0.55623	1.01997
0.95369	1.02096	1.03921	0.98166	1.10896	1.01205	0.89463	0.76592	0.94686	0.71905	1.11698
1.06286	0.8574	1.04905	1.02899	1.09339	0.76144	0.78482	0.97058	0.61604	0.66733	1.48351
1.20637	0.79722	1.6003	1.07072	1.12303	0.84026	0.92153	0.88558	0.64327	0.87025	1.1829
1.0741	0.94014	0.98002	0.86098	0.83379	1.16292	1.0437	0.65292	1.09675	0.64922	0.23291
0.89459	0.85424	0.98623	1.05375	0.82297	1.20506	0.95339	0.88616	0.70427	0.93193	1.1244
0.89634	0.84912	1.16997	0.98691	0.9392	0.28412	0.94729	1.1077	1.06976	0.94521	1.08543
0.72504	0.8897	0.98975	0.8451	0.98699	0.91065	0.90721	1.07649	0.61713	0.35183	0.73922
1.00113	1.00758	1.0434	2.07731	1.18201	1.13128	1.03709	0.70278	0.94439	0.4492	1.166
1.08067	1.25949	0.99198	1.05933	0.66879	0.70551	0.81987	0.83207	0.93933	0.89841	1.28289
1.03339	1.03119	0.98528	0.90578	0.92731	1.21187	0.76366	0.9464	0.73155	0.63547	1.29399
1.18618	0.64334	1.04832	1.14726	0.99108	0.93526	0.77175	0.90735	0.89031	0.89476	1.11601
0.99404	1.07634	1.05401	0.90509	0.988	1.08335	0.5699	0.8771	0.61777	0.86106	1.05239
1.08379	0.97705	1.11919	1.02974	0.83341	1.01795	0.68226	0.94357	0.56132	2.55462	1.07416
1.06803	0.98317	1.13241	0.98015	1.18245	1.0157	0.83441	0.95009	0.77698	0.85535	1.14263
1.14201	0.86139	1.15641	0.92118	1.04803	1.01993	0.91801	0.80462	0.91178	0.67876	0.89515
0.82281	0.90761	1.14861	0.95561	0.99089	0.98799	0.55181	0.66017	0.76926	0.35219	0.87718
1.14635	0.94764	0.95753	1.20132	1.08801	1.22509	0.8392	0.86784	0.96522	0.69325	2.54268
0.93451	0.88666	0.82794	0.53984	0.69516	1.1722	0.89492	1.1194	0.67905	0.41038	1.60269
0.94626	0.92553	0.88715	0.85666	0.75864	0.74445	0.70201	0.82644	1.15403	0.72831	1.40988
1.02536	0.7771	1.00246	0.9688	1.09364	0.88999	0.8562	0.77281	1.03414	0.52017	0.99413
0.40581	1.01822	1.0606	0.88805	0.67579	1.034	0.86661	0.92337	0.75445	0.69434	0.70563
1.09835	0.61139	1.02892	0.66906	1.00927	1.11816	1.11219	0.83471	0.83726	0.68357	1.03172
1.10182	0.77303	1.13734	0.93923	1.03407	1.04358	0.84696	0.73479	1.02432	0.53003	1.16342
0.50767	0.62313	1.00058	0.68646	0.9676	0.742	0.66407	0.89064	0.97799	0.6527	1.42135
1.16363	1.44499	0.87473	0.62667	0.82915	0.91155	0.83957	1.01057	0.71924	0.50223	1.23114
1.19534	0.87102	1.06034	1.07731	0.93154	1.12075	0.9131	0.93475	2.14657	0.88279	1.01518
0.86002	0.92678	1.1317	0.78933	0.82007	0.93453	0.81398	0.86225	0.87017	0.7449	1.18726
0.89934	1.03573	1.18493	0.7736	1.06674	0.93577	0.6268	1.02952	0.79166	0.73535	1.04614
1.13346	0.96042	0.66896	1.01412	1.07489	0.89945	0.87262	0.71575	0.82667	0.82922	1.15213
0.97182	0.9553	1.05807	1.11996	0.82579	1.16303	0.86541	0.95418	0.67335	0.58964	1.17429
0.90894	0.76023	0.693	0.73715	1.01045	0.93644	0.89177	1.00943	0.98279	0.76524	0.96621
0.92883	0.86961	0.98432	1.06172	0.89995	1.13422	0.9282	0.81323	0.83567	0.65041	1.25894
1.1321	0.88773	1.09461	0.96585	1.00231	1.00102	0.66036	0.77328	0.70298	0.92719	1.34472
1.00055	0.90255	0.91678	0.96078	0.99616	1.14027	0.87732	0.93937	0.97933	0.86922	1.17261
0.73665	0.88928	0.95592	0.95304	1.0956	1.23479	0.80449	0.78407	1.05453	0.82614	1.41595
0.97578	0.97909	1.10962	1.13585	0.92489	1.15348	1.00917	0.5563	0.77046	0.85099	2.14412
0.90459	1.01146	1.4441	0.87556	0.9691	1.33559	0.62465	1.11131	0.73859	0.85422	1.33425
1.00298	1.03257	1.05386	0.98301	0.99852	1.04662	0.84926	0.99097	0.894	0.97668	0.88676
0.71309	0.67435	1.18815	0.83712	0.91418	1.39097	0.94132	0.61683	0.88106	0.69964	0.93812
0.91747	1.0578	1.02127	0.93323	0.50898	1.29566	0.7683	1.11789	0.89654	0.29306	1.12805
1.03847	1.06257	1.08061	0.95725	0.938	1.19132	1.04537	0.89657	0.59617	0.75183	0.88874
1.23021	0.68434	1.03824	0.88477	1.00093	0.96882	0.70684	0.52845	0.60789	0.26669	1.30905
0.86438	0.6734	1.20316	0.96675	0.97473		0.9685	1.09775	0.82976	0.27025	1.1804
1.10061	1.04839	0.90884	0.69207	1.01697		0.9009	1.06014	1.01013	0.50447	1.03849
0.77901	1.12766	1.10301	0.82811	0.84794		0.79324	0.61543	0.99607	0.55909	1.22008
1.14176	1.08219	1.06733	0.81499	0.85271		0.63328	0.95649	0.89839	0.39023	1.14603
1.07756	1.06033	1.1653	1.31435	0.96098		0.49329	0.94184	0.52891	0.83994	1.94474
1.11448	0.88017	0.63296	0.68372	1.20655		0.65814	1.09698	1.02083	0.38651	0.88895
0.92218	0.57576	1.13649	0.95995	1.08642		0.75257	0.81524	0.88462	0.66566	1.38031
0.91691	0.85091	1.15801	0.96449	0.87145		0.98643	1.26134	0.81383	0.63176	1.05588
0.6343	0.9835	1.05154	1.07019	0.81691		0.85463	1.12587	0.92026	0.59363	1.05294
0.99625	0.72422	1.27179	0.77022	0.95208		0.66161	0.5931	0.89283	0.46671	0.79955
0.74293	0.91488	1.24665	0.95685	0.50163		0.96954	0.96526	0.73853	0.67889	1.91963
1.00808	0.85925	0.84985	1.25823	0.82242		0.75252	0.8157	0.86676	1.10044	1.22978
0.80807	0.60434	1.15046	2.66401	1.10374		0.62359	0.86372	0.98625	0.97084	0.70076
1.13834	0.649	1.152	0.8265	1.02531		0.85716	0.78044	0.90799	0.41204	0.81383
0.86903	1.23367	1.23836	0.74615	0.61052		0.61086	0.63376	0.64619	0.88037	0.84487
0.94477	0.44257	1.97332	1.199	1.01749		0.73481	0.88272	0.93685	1.02788	0.55494
1.13392	0.60097	1.23049	0.9892	0.92589		0.70573	1.03555	0.62047	0.8297	1.12911
0.96981	0.6488	0.96239	0.97066	0.62849		0.38087	0.91665	0.84379	0.81452	1.22557
0.61039	0.8159	1.15631	1.02984	0.89547		0.84363	0.7773	0.91253	0.73866	0.97704
1.00445	0.98587	1.09552	0.64039	1.05338		0.67787	0.5639	0.90724	0.58669	0.90229
0.9766	1.01958	0.86686	1.08247	0.96313		0.38889	0.87655	0.86739	0.73664	0.94697
0.7379	1.03559	0.9344	1.11375	0.97125		0.76123	0.67232	0.87364	0.8972	0.71468
1.03693	0.94184	1.19121	1.11308	1.0701		0.95916	0.90736	0.95025	0.73729	1.41628
0.85985	0.70643	2.24792	1.08236	1.02411		0.76275	0.8206	0.79589	0.57229	0.87994
0.78304	0.96009	1.17039	1.10686	1.00027		0.49509	0.94441	0.80537	0.45247	0.86106
0.89238	0.95154	1.23608	0.67191	1.03429		0.82073	0.52896	0.86814	2.68808	1.17161
1.0272	0.93835	1.169	1.03864	0.78355		1.06077	0.88432	0.97472	0.73913	1.15103
0.5205	0.5681	1.07735	0.86044	0.97174		0.7536	0.98888	1.12415	0.68528	1.71517
1.63556	0.55571	1.00097	0.99088	0.60762		0.81556	0.8784	0.77935	0.74849	1.12873
1.00521	0.97517	0.89531	1.03073	0.95871		0.83199	0.95148	0.85169	0.76324	1.25976
1.05119	1.07773	1.03709	1.0671	0.76789		0.82159	0.78997	0.6206	1.14085	1.28579
0.84578	0.97096	1.07506	0.97187	1.06278		0.60942	1.08892	0.71546	0.75155	1.12862
1.148	0.87481	2.66936	0.64093	0.92491		0.75325	0.8414	0.51676	3.79199	0.42411
0.9899	0.5894	1.00388	0.92142	1.06796		1.07658	0.83438	0.90998	0.81115	0.628
1.02498	0.8977	1.10861	0.81152	1.02614		0.78957	0.81194	0.91267	0.71456	1.93394
0.89467	0.68556	1.09723	0.83939	1.14896		0.65902	0.93263	0.68431	0.4719	1.12542
1.03445	0.85499	1.00997	0.83599	0.88282		0.82737	0.90698	0.88013	1.14625	1.17245
0.86019	0.76383	1.09462	0.92699	0.67878		0.83397	1.02681	0.9872	1.02241	1.85961
1.08897	1.0253	1.19197	0.80909	1.1855		0.86964	1.09554	0.86392	0.81573	1.15438
0.78727	0.89666	1.19615	0.78038	0.9543		0.91909	1.05383	0.90206	0.68588	1.3894
1.02293	0.90731	1.01736	1.36771	0.93234		0.85312	0.86419	0.59203	0.83825	1.21389
1.0929	0.48031	1.40327	1.06298	0.95606		0.85109	0.88452	0.85602	0.6894	1.19752
0.70086	0.68321	1.06888	1.07528	1.10688		0.69999	1.05711	0.88077	0.79136	1.25258
0.97298	0.86858	1.23173	1.05721	0.95412		0.96297	1.04294	0.87134	0.78167	1.45631
1.00476	0.90829	0.98195	1.00502	1.03016		0.9425	0.89916	1.23386	0.88405	0.93686
1.10709	0.87782	0.97371	0.92883	1.01373		0.50285	0.84687	1.07116	0.77103	1.44844
0.99164	0.83962	1.00103	0.87102	0.89159		0.8615	0.75855	0.66161	0.73974	1.07202
0.99199	0.9038	0.91434	0.89063	0.71208		0.94119	1.18379	0.24673	0.84401	1.38299
1.03871	0.7873	1.19613	1.10474	0.84991		0.53933	0.94061	0.74491	0.64615	1.03785
1.04763	0.75684	1.18146	0.90451	0.53599		0.79936	0.8671	0.78582	0.91206	0.99118
0.89434	0.91431	1.20744	1.22343	0.72986		0.7804	0.9084	0.75128	0.34118	1.13862
0.97143	0.73354	1.1286	0.97284	1.02754		0.73055	0.83551	0.98158	0.38986	0.90309
1.05216	0.8245	1.22441	0.88958	1.18441		0.76158	0.96184	0.4435	0.75016	0.90713
0.97117	0.6095	0.96514	0.99768	0.53317		0.70536	0.94699	0.79257	0.54924	0.5547
0.9333	0.68111	1.04636	0.90506	1.26135		0.88997	0.83014	0.86527	0.59828	1.14774
1.08315	1.04484	1.03401	0.66345	0.77839		0.43528	0.76078	0.83563	0.83506	1.06712
0.80985	0.99095	1.06244	0.85555	0.70552		0.7013	0.94972	0.77852	0.98129	0.75698
0.86062	0.92745	1.05642	0.54929	0.93831		0.85451	0.89649	1.02565	0.80671	1.24285
1.11463	1.00205	1.15935	1.21611	0.80044		0.87592	0.89772	0.80265	0.88453	1.58954
1.11547	0.9995	1.03007	0.91218	0.77484		0.97105	0.82651	0.98536	0.30984	1.1643
0.65672	1.10212	1.18697	0.90625	1.03962		0.80911	1.23574	0.9173	0.77692	1.16085
1.01971	0.83163	0.92425	0.87895	0.96975		0.72657	0.8465	0.55469	0.48147	1.03567
0.61369	0.49495	0.91338	1.05048	0.7548		0.64674	0.8706	0.49973	1.02475	1.08521
0.92305	0.65582	1.2491	0.96539	0.62537		0.91375	1.05675	0.69199	0.63387	1.10876
1.14182	1.04851	1.25433	1.01065	0.9881		0.75583	1.10778	1.0201	0.41473	1.06652
1.0718	0.9065	1.09963	1.06036	1.14896		0.83677	0.91824	0.84436	0.90854	1.0147
1.31415	1.01397	0.88753	1.06769	1.02842		0.9277	0.90279	0.91275	0.91685	2.17883
1.08964	0.89227	1.11348	0.8514	0.55549		0.72337	0.89146	0.83359	0.88346	1.27385
1.19023	0.87188	1.11688	0.98884	0.57385		0.84016	0.80028	0.8498	0.9489	1.04629
0.82936	0.97808	1.0292	1.00471	0.95855		0.60507	0.52544	1.03399	0.75213	1.17927
1.07416	0.99486	1.08436	1.1171	0.87597		0.83893	0.92309	1.00868	0.71507	1.26006
2.48601	0.80921	0.92869	0.99868	0.96922		0.96679	0.94859	0.93919	0.6066	0.70084
1.07054	1.20698	1.26626	1.05928	0.78793		0.54269	0.92445	0.54429	0.697	1.41341
1.07803	0.7719	0.91525	1.01797	0.94764		1.05405	1.16788	0.86737	0.53448	1.03635
0.98167	0.93403	1.08688	0.76251	0.88998		0.89545	0.89221	0.80728	0.73406	1.06376
1.1892	0.84252	1.11824	0.93639	0.74488		0.75136	0.96797	0.5005	0.8421	1.19135
1.12216	0.94923	0.7714	1.0929	1.02296		0.83325	0.63647	1.01082	0.64423	1.36233
1.25828	0.8027	1.02323	0.83161	0.85393		0.77824	0.78494	0.73567	1.03763	1.19831
0.94283	0.91142		0.8785	0.71804		0.88282	0.91284	1.15221	0.85001	1.02323
1.11898	1.03973		1.0435	0.85221		0.77183	0.78793	0.99611	0.51135	0.94632
0.92851	0.89374		0.63678	0.98551		0.91825	3.158	0.68504	0.80703	1.09577
1.10761	0.75188		1.02049	0.89928		0.75131	0.80331	0.62408	0.62953	1.13226
0.94851	1.00547		1.18703	0.79695		0.91338	0.89084	1.14584	0.60326	0.88501
2.07201	1.00541		1.1745	0.73636		0.56261	0.83763	0.90543	1.40285	1.20713
0.93133	0.88426		1.03377	0.84517		0.68243	0.90103	0.90617	0.89853	1.3766
1.01892	0.86843		0.93529	1.01956		0.6164	1.01292	0.71052	0.53146	1.33151
1.04052	0.9355		0.95061	1.12339		0.88286	1.06203	0.92941	1.16457	1.30453
0.5601	0.99029		1.01883	1.04507		0.48163	0.7694	1.00212	0.96622	1.3311
1.10861	0.68167		0.77807	0.97774		0.74835	1.34541	0.42858	0.36317	1.14363
0.87746	0.68835		0.84685	0.8651		0.74116	0.83503	0.84585	1.05134	1.08969
1.00908	1.11448		0.82027	1.20824		0.90807	0.77477	1.16826	0.5185	1.65858
0.9673	1.00454		0.73193	0.87091		1.21613	0.96954	0.76068	0.89981	1.13046
0.99422	0.87835		0.86046	1.04241		0.95084	0.90643	0.94647	0.93256	1.10969
0.93152	0.88062		1.09666	0.96223		0.9017	0.87323	0.84801	0.70033	1.22534
1.09083	0.82053		1.14456	1.00934		0.74878	0.92026	1.3078	0.75136	1.07594
1.05763	0.84412		1.06255	0.92751		0.79607	0.93187	0.96763	0.83698	1.2696
1.11001	1.09997		0.72374	0.9413		0.74449	0.78467	0.70333	0.7263	0.91501
1.05112	1.01203		1.02114	0.97295		0.89654	1.04224	0.9993	0.75775	0.88626
0.97089	0.84727		1.18159	0.80925		0.86091	0.82689	1.00912	0.64701	1.19279
0.98224	0.9257		1.05375	1.11793		0.82811	0.75075	0.81033	0.80969	1.19764
0.76293	0.87903		0.87367	0.95803		0.84631	0.59084	0.82616	0.69443	1.33706
1.11525	0.8744		1.10911	0.90102		0.76814	0.8894	0.62592	0.73539	1.00647
0.64784	1.00357		0.92158	0.94895		0.62913	0.87196	0.98107	0.48652	1.07046
0.61493	1.07885		0.81925	1.11634		0.59708	1.01328	1.13272	0.35772	1.24762
1.08765	0.86934		0.91528	0.81909		0.65434	1.0777	0.89117	0.67542	0.76096
1.2234	0.98203		0.45084	1.20044		0.75286	4.09171	0.90934	0.77379	1.94004
1.03517	1.14424		1.14856	0.93474		0.8952	0.91274	0.89338	0.73336	0.94038
1.10468	0.86345		0.99712	1.05302		0.68138	1.06315	0.83519	0.58589	1.17159
0.92136	1.06662		0.72754	0.89793		0.66279	1.03572	1.40046	0.40588	1.38047
1.11287	1.04201		0.97137	1.01546		0.94329	0.77673	1.12023	0.55715	1.38117
0.94835	0.96073		1.15969	0.8926		0.93451	0.99846	0.37636	0.62613	1.22589
1.04118	0.89459		1.12803	1.07093		0.75311	0.80663	0.62379	0.74741	0.62586
0.80455	2.15218		0.9161	1.13193		0.78024	0.81237	0.86448	0.9269	1.05699
0.93711	0.94722		0.98888	0.78719		0.80558	1.01107	0.87735	0.69231	0.97202
0.5628	0.70389		1.25243	1.04444		0.85315	1.01225	0.82475	0.67077	1.05886
0.39748	1.00888		0.70573	0.71225		0.43077	0.95351	0.83022	0.60227	0.87231
0.89247	0.98951		1.0643	1.05984		0.70913	0.85953	0.99175	0.97212	0.84141
1.05759	0.99653		0.77201	0.85172		0.91109	0.95115	0.57283	0.7372	1.24509
1.00928	1.10782		0.8427	1.0998		0.74353	0.78773	1.18453	0.77009	1.11122
1.0672	1.0052		1.09654	0.89978		0.70211	0.79307	1.26308	0.71184	1.1271
0.4401	0.84924		1.1155	0.99018		0.7504	0.95716	1.12695	0.81536	1.95656
1.28658	0.98836		0.97206	0.64429		0.85205	0.9225	0.7208	0.91698	0.90939
1.10695	1.04135		0.76814	0.9934		0.85229	1.01293	0.77192	0.6182	0.6739
1.04312	0.95363		0.83971	0.7076		1.00786	0.97812	0.9761	0.71422	1.28226
0.96554	0.99822		0.80101	0.66398		0.85212	1.20645	0.96895	1.0413	1.04683
0.88181	0.81461		0.62617	0.71497		0.79944	0.96251	1.03716	0.79978	0.67733
1.14369	0.87453		0.94278	0.73141		1.08627	1.1025	0.78768	0.6719	1.17211
0.9039	0.83081		0.70594	1.01995		0.7493	1.00644	0.94771	0.56791	1.14197
1.13003	0.87462		1.17926	1.16632		4.04406	0.74948	0.49297	0.78228	1.11414
1.03379	0.88581		1.05163	0.98286		0.87657	0.99726	0.9609	0.77145	1.32384
1.13167	0.86895		0.66541	0.96457		0.81462	0.82916	0.76795	0.36437	1.38694
0.89108	0.72056		1.05029	1.14884		0.70561	0.44294	0.63771	0.97768	0.71979
0.92666	0.80232		0.25071	1.11269		0.92994	0.91455	0.98328	0.76769	1.20614
0.74333	0.86649		1.2001	0.95494		0.72396	0.59594	1.03134	0.98472	1.24081
1.20674	0.63319		0.77115	1.04847		0.99385	0.54976	0.826	0.89393	1.54617
0.99501	0.88054		0.88002	1.06887		0.84347	1.19703	1.21845	0.71168	1.0731
1.01681	0.86953		0.93708	0.83348		0.88848	1.00176	0.64249	0.4327	0.76394
1.02942	0.82971		0.93245	0.81283		0.83162	0.86243	0.65799	0.70851	0.93269
0.70321	1.03989		1.01017	1.06225		0.621	0.91895	1.09987	0.73058	1.16631
1.12566	0.96967		1.12238	1.0509		0.67419	0.86655	0.51042	0.62033	1.35737
0.77869	1.02962		0.76846	1.02588		0.8281	0.82995	0.59247	0.77901	1.29156
1.06451	0.88761		0.72123	0.92735		0.74013	0.99162	0.72127	0.8946	1.14667
1.07603	0.99594		1.17876	0.81832		0.85238	0.67705	1.02587	0.79732	1.1532
0.71832	0.83161		1.0151	0.92493		0.88513	0.95741	1.06418	1.21974	1.3618
0.97326	1.14176		0.78057	0.75926		0.66053	0.9257	0.73238	0.68784	1.41715
0.99146	0.90346		0.58224	1.04086		0.8522	0.97784	1.12144	0.64367	0.99188
1.12133	0.84322		0.98878	0.62516		1.00223	1.06952	0.99752	0.88173	1.0597
1.00826	1.01092		0.91792	0.68396		0.69701	0.97978	0.74011	0.85864	1.0779
1.02737	1.081		0.7988	0.94501		0.76191	1.01628	0.86452	0.59244	1.34159
1.15735	0.86408		0.86374	0.93268		0.78264	0.74457	0.91802	0.95565	1.02597
0.92877	0.90083		0.87251	0.99998		0.76786	0.63304	0.91069	0.76021	3.63487
1.11496	0.91747		1.26724	0.90203		0.81001	0.73933	1.02505	0.56514	0.86096
0.97763	0.85614		1.11475	1.12138		0.5959	0.98197	0.95443	0.61384	1.86861
0.90623	0.84593		1.06758	0.96788		0.54583	0.86463	0.67847	0.63722	1.0224
1.06518	0.4521		0.80689	1.01991		0.82003	0.96017	0.5169	0.6809	0.94176
0.81999	0.96955		0.57776	0.71547		0.75059	0.68643	0.92307	0.57314	0.86234
1.03445	0.75213		1.00125	0.88927		0.82005	0.62957	0.88628	0.74715	1.85552
0.91204	1.05686		0.76542	1.00568		0.55159	0.63688	1.16046	0.69677	1.12118
1.14957	0.9054		0.95237	0.97789		0.66139	0.72986	0.76373	0.66811	0.93588
0.91782	0.95777		1.06261	0.95141		0.79504	0.92655	0.78666	1.17298	1.21702
1.11145	0.88568		0.92199	0.89088		0.60175	0.74836	0.9055	0.99598	1.11979
1.06874	0.8351		0.78162	0.84024		0.76085	0.87741	0.90611	0.69065	0.77262
1.33378	0.88306		1.01824	0.56243		0.82316	0.94883	0.86902	0.78059	0.69248
0.74317	0.93714		1.01151	0.88564		0.73538	0.83562	1.26706	1.42354	1.07941
1.09284	0.92505		0.80368	0.71468		0.86901	0.74331	0.62703	0.58368	1.11128
0.85893	0.89341		1.05922	0.98636		0.83895	1.22214	0.68514	0.83796	0.90811
0.7317	0.7258		0.91021	0.92066		0.93553	0.93862	1.05919	0.62312	2.27253
1.0726	1.21875		1.10616	0.90874		0.8099	0.82716	0.88637	0.93273	1.14017
0.87354	0.90637		0.92218	0.8189		0.6611	1.02396	0.93921	1.00337	2.48872
0.96648	1.00268		0.93804	0.74999		1.03384	0.90138	0.78923	0.85085	0.95414
1.08272	0.77331		0.84353	0.71482		0.77438	0.88334	0.82768	0.71819	1.01273
1.08307	1.12119		0.96539	0.99935		0.83662	0.83643	1.01605	0.83152	0.73696
1.08086	0.82626		0.96332	0.81023		0.93553	0.81521	1.47099	0.77154	0.78707
1.13291	1.0009		0.99243	0.79774		0.21946	0.89986	0.91113	0.72804	1.47564
0.86995	0.93369		1.04368	1.14939		0.94575	0.6888	0.47558	0.64445	1.22151
0.84347	0.79562		0.58883	0.98245		0.85791	0.93547	0.78072	0.81022	1.11001
0.90955	0.99664		0.899	1.09717		0.8213	0.96394	0.9737	0.44654	0.74737
0.94949	0.78825		0.99854	0.99006		0.86653	0.61059	0.73549	0.71359	0.81618
1.16461	0.86219		0.94966	0.53576		0.76529	0.89325	1.46606	0.76885	0.76713
1.17385	0.93297		0.83396	0.69948		0.80401	0.70459	1.0278	0.82748	1.23349
1.02679	0.96115		0.95327	0.98862		0.66049	0.94062	0.89911	0.71195	1.2021
1.22265	1.12017		1.01173	0.93468		0.8397	0.98712	1.03197	0.61313	1.27732
1.13252	0.89446		0.98146	0.94747		0.89009	0.9234	0.7957	0.27171	1.95155
0.75622	0.77854		0.89293	1.15665		0.82076	0.92596	0.81497	0.58689	0.93538
0.92746	0.53733		0.94945	1.21518		0.84343	0.95089	0.65132	0.67152	1.17753
1.00175	0.8657		0.45894	0.98516		0.85611	0.96576	0.87879	0.95917	1.01206
0.92979	0.80947		0.9208	1.05742		0.91152	1.00629	0.86932	0.64676	0.63195
1.15931	0.96708		0.85316	0.77103		0.759	0.88718	1.08544	0.75015	1.04885
1.13678	0.80321		0.90161	0.72607		0.85051	1.0397	0.76221	0.90127	1.00137
1.17925	0.94932		1.05884	0.99474		0.93123	1.01288	0.55469	0.76339	0.79678
0.97971	0.94278		0.77996	0.973		0.73963	0.81292	1.05084	0.89892	0.78077
0.91033	0.94624		0.92753	0.85298		0.5895	0.63562	0.97398	0.99534	1.05794
0.89233	1.18581		0.8569	1.12651		0.6671	0.91803	0.77487	0.34147	2.23674
1.20209	1.12515		0.99944	0.74152		0.89968	1.08043	1.03244	0.63369	1.2353
1.12893	0.96419		0.52927	0.8526		0.74877	1.0063	1.05711	0.4371	0.95005
0.89775	0.90684		0.9947	1.01904		0.76015	0.66096	0.92905	0.34629	1.31947
0.72777	1.04664		0.9132	1.0085		0.90371	0.76467	1.07392	1.24606	1.06805
0.89962	0.69928		1.07171	0.60775		1.1086	0.73521	1.09608	0.32969	1.12721
0.74556	1.0121		0.96908	0.82838		0.87333	1.04484	1.18558	0.82947	1.24544
1.30537	0.70104		0.749	0.77963		0.38896	0.79432	0.55078	0.82979	1.06917
0.63645	0.73701		0.97701	2.65507		0.9681	0.79115	0.84944	0.93569	1.97641
1.14334	0.89185		1.06236	1.15224		0.8525	0.90987	0.78516	0.81141	1.14091
1.15333	0.81436		0.89854	0.88854		0.84018	0.90442	0.77124	0.88877	1.16897
1.01716	0.8496		0.90202	1.31614		0.8334	0.88648	1.00668	0.92933	0.95984
0.96746	0.83863		0.7939	1.01733		0.84086	1.17614	1.08509	0.67326	1.38767
1.14752	1.13103		0.83644	0.75443		0.86213	1.04457	0.87736	1.82989	1.28169
0.75757	0.89833		1.04145	0.93836		0.77779	0.71454	0.89963	0.45911	1.1701
0.9537	0.87705		0.36899	0.60606		0.9153	0.7926	0.84932	1.19839	1.02296
0.90405	0.78241		1.03316	0.93318		0.79728	2.08339	0.98807	0.7027	1.35888
0.87777	0.94345		1.07004	0.94689		0.51966	0.97961	0.43777	0.41983	0.78654
0.58402	0.98259		0.55632	1.12905		0.92454	0.57156	2.83678	0.9247	1.33144
0.96622	0.89512		0.41114	1.06232		1.10835	1.08531	1.00632	0.43256	1.41807
0.91358	0.78403		0.53838	0.46298		0.78253	0.6985	0.87668	0.52886	1.17051
0.66349	0.96545		0.81042	0.90202		0.77429	0.83644	0.93752	0.79997	1.25849
0.86071	1.03602		0.96744	1.04709		1.02726	1.12526	0.91513	0.54283	1.4341
1.13344	0.84689		0.92422	0.70631		0.48657	0.73926	1.0656	0.65041	0.88702
1.10602	0.78093		0.30797	0.76091		0.93197	0.5027	0.76559	0.80504	2.22044
1.23049	1.01486		0.92143	0.74441		0.81357	0.77695	0.77427	0.6404	1.21255
1.10213	0.96706		1.04529	1.0675		0.65742	0.75288	0.71582	0.638	1.3801
1.14033	0.7878		1.09915	0.88924		0.91935	0.86642	1.09001	0.6597	0.70269
0.88922	0.95217		0.92341	0.82103		0.95798	1.05486	0.89508	0.41924	0.85741
1.06502	0.80004		1.20278	0.83321		1.15418	0.96848	0.79734	0.69624	1.56398
0.85511	0.8833		0.94516	0.63803		0.94057	1.0863	0.81039	1.07035	1.01346
1.0667	0.94954		0.56747	1.0271		0.85847	1.01464	0.74078	0.68449	0.92415
0.93887	1.04053		0.91244	0.80827		0.66782	0.6001	0.85174	0.80564	1.23366
1.26159	0.87891		1.03059	1.16262		0.90528	0.79209	1.11015	0.70333	0.48647
1.11801	0.65492		1.01581	1.02748		1.01079	0.87838	0.68148	0.82347	1.04298
1.1546	1.02938		0.7446	1.08066		0.79807	0.89884	0.58971	0.71471	1.23717
0.7888	0.93072		1.0764	0.94168		0.76183	0.92021	0.99386	0.79895	1.9956
1.05386	0.71995		1.08071	0.86068		0.73171	0.80303	0.77453	0.7928	1.259
0.97114	1.06729		1.04612	1.00082		0.6882	0.94091	1.26789	0.66109	1.19836
0.96499	0.87373		1.2301	1.0078		0.76913	0.89273	0.82839	0.29078	1.65724
1.00235	1.02763		0.86064	0.74229		0.72243	1.00202	0.69223	0.31974	1.43819
0.92795	0.91417		0.89525	1.25815		0.95842	0.8364	0.88934	0.72036	1.37348
0.78923	0.73527		0.83745	0.90876		0.79162	1.25975	1.26016	0.81336	0.87597
1.07984	0.88801		0.82832	1.01717		0.87649	1.03179	0.7702	0.7031	0.74986
1.13901	0.93504		0.6715	1.10631		0.76008	0.55418	0.73811	0.87734	1.21453
1.21434	0.92062		0.91968	0.84842		0.85949	1.04548	0.77082	0.57	1.26161
1.03482	1.03994		1.00015	0.6799		0.62245	0.88205	0.9152	0.73518	1.30445
0.97627	0.87454		1.03519	1.11951		0.74639	0.78197	0.68219	0.84298	1.06688
0.99865	0.74071		0.79831	1.07803		0.91678	0.88062	0.742	0.34179	1.46856
1.15943	0.99444		0.91094	0.98599		1.01806	3.27291	0.8925	0.64349	1.17112
1.10112	0.89322		0.87785	1.3104		0.78039	1.03559	0.80244	0.4703	1.31358
1.12298	0.78578		0.92646	0.99175		0.9006	1.28059	0.8443	0.88296	1.01995
1.05448	1.15525		1.08525	0.91396		0.73768	0.91707	0.96371	0.48937	1.06799
1.20757	1.14069		1.05755	0.89769		0.75102	0.88691	0.88781	0.93282	1.12438
1.23408	0.7902		1.05922	1.10307		0.80877	0.8691	0.50907	0.86263	1.02561
0.97394	0.86958		1.20203	0.8546		0.8281	0.84954	0.9271	0.90101	1.28964
0.78212	1.05059		0.83203	0.9675		0.77807	1.04069	0.97707	0.68317	1.19941
0.97002	1.34149		0.47613	0.85699		0.69198	0.82957	0.95576	0.7055	1.23054
0.7586	0.88525		0.9039	0.78322		0.82126	0.87732	0.95799	1.11941	1.35134
1.28039	1.07645		0.94504	0.90978		0.80493	0.76882	0.85758	0.81897	1.27935
0.73229	0.8058		1.01133	0.79794		0.87202	1.30561	0.64985	0.80951	1.0936
0.72411	1.08636		1.03494	1.031		1.09843	0.88372	0.60515	0.24719	1.17792
1.02902	0.93564		1.00137	1.15199		0.9051	0.88728	0.75481	0.74553	1.26405
1.27886	0.88229		0.73306	0.90381		0.8424	0.8357	0.83763	0.63934	0.98823
1.22116	0.89687		1.05732	0.92389		0.80388	1.12305	1.019	0.76147	1.19296
1.18256	1.00654		0.93492	0.94758		0.76378	1.0641	1.11558	0.84129	1.48679
1.05866	1.91898		0.9693	0.88002		0.73503	0.96256	0.85606	0.61725	1.23333
1.34973	0.86045		0.82697	1.03959		0.49063	1.07697	0.97465	0.51393	1.19867
0.97047	0.64652		1.04112	1.13727		0.50147	0.61762	0.84465	0.56458	0.92448
0.95987	0.81423		1.08973	1.0067		0.96616	0.86855	0.58753	1.27306	0.94547
0.89889	0.77248		0.63966	0.36316		0.88819	0.59163	0.73973	0.82216	1.34377
0.79503	0.85955		0.82662	1.18263		0.63785	0.97904	0.80679	0.61228	1.40576
0.80345	0.80994		1.04336	0.84477		0.55278	1.04546	0.97768	0.8649	2.01913
1.02936	0.75502		0.84174	0.96364		0.80105	0.89287	0.65736	0.92543	1.26853
1.00306	0.89272		1.04855	1.14806		0.81876	0.84521	1.0357	0.77348	1.19896
0.87313	0.78656		0.93208	0.92858		0.80625	0.88288	1.09727	0.85574	0.42711
1.12441	1.10183		1.02561	0.82536		0.85	0.98088	1.07311	0.79197	1.39086
1.08791	0.91597		0.95051	1.20295		0.85665	0.86169	0.47794	0.92935	1.18738
0.99573	0.91205		0.91129	0.86022		0.91586	1.08103	0.90502	0.71301	1.16659
0.38963	0.95706		0.94572	0.96897		0.74613	0.83361	0.99963	0.46763	1.28582
1.02701	0.64541		0.97195	1.12838		0.85816	0.7833	0.83578	0.97592	1.31748
0.98849	0.82745		0.89096	0.81807		0.74136	0.84446	1.07651	0.75602	1.34874
0.93045	1.06771		0.96482	0.81847		0.96226	1.0539	0.90117	0.69725	1.22626
0.73835	0.8265		0.94139	0.99657		1.20934	0.79417	1.16362	1.00002	1.19384
1.08902	0.93358		0.9498	1.07912		0.84362	0.71012	0.89474	0.63588	1.25131
1.11304	0.67695		1.01733	1.20443		0.59077	1.01232	1.00212	0.75134	1.14316
0.78034	0.94331		0.83926	0.91174		1.05679	0.82167	0.53744	0.62468	1.13722
0.85198	1.00284		0.92076	1.04878		1.02134	0.89782	1.04025	0.54915	0.71642
1.06668	1.09716		0.58425	1.04637		1.35348	0.88022	1.03769	0.84555	0.53553
1.01554	1.07439		0.84736	0.84829		0.78601	0.36267	0.99597	0.75856	1.18395
0.43528	0.97399		0.92471	1.00723		0.74142	0.90139	0.86713	0.79025	1.80517
1.04871	0.67425		0.95516	1.20902		1.10362	0.96104	0.81674	1.15616	1.21282
0.95594	0.99199		1.0281	0.76287		0.85809	0.90846	0.89118	0.7825	1.86354
0.94046	0.59217		0.90183	0.57305		0.75182	0.77918	0.55234	0.61991	0.87449
1.1549	0.72852		0.87329	0.83494		0.81863	1.17366	0.94701	0.40751	1.12652
1.02648	0.91125		0.94339	0.67019		0.53811	0.71972	0.73708	0.96848	1.3268
1.04259	0.99022		1.02846	1.08235		0.63175	0.92878	0.97223	0.45557	1.19138
1.04267	0.82111		0.96245	1.17433		0.84872	0.91562	1.10044	0.65759	0.83131
0.92753	0.8549		0.75427	1.20517		0.80631	0.58661	0.88339	0.80875	1.07176
0.9178	0.62604		1.19218	0.92437		0.79865	0.73932	0.95033	0.57557	1.70443
0.97227	0.91218		1.12904	0.97825		0.77729	0.86073	2.98889	0.82205	1.05991
1.24822	0.62983		1.12141	0.95468		0.9188	0.86721	0.87265	1.18261	0.81644
0.77685	0.84186		0.89852	0.91838		0.93883	1.12244	0.65908	1.01374	0.94551
1.62781	0.94012		0.48031	1.01931		0.51123	0.92539	0.821	1.56697	1.07555
0.79791	0.75655		1.01865	0.74183		0.98311	0.6694	1.08295	0.82723	0.66102
0.98166	0.97494		0.8692	1.00756		0.973	1.09242	0.92692	0.47451	0.99786
0.86724	0.87506		0.94652	0.97605		0.82303	0.99741	0.81549	0.79176	1.50443
0.46808	1.01504		0.99387	1.03101		1.00153	1.03604	0.94811	0.63679	1.04593
1.01557	0.92735		0.6995	0.80925		0.73974	1.1974	0.84751	0.74429	0.967
1.01084	0.80147		1.2437	0.76498		0.92257	0.85146	1.01484	0.58269	1.89709
1.05614	0.85008		1.26032	0.73255		1.03652	0.69784	0.83901	0.69503	0.86291
0.6843	0.92115		0.79658	0.91534		0.84984	0.95692	0.90151	0.97833	1.32078
0.99718	0.95756		0.93507	0.51974		0.84273	0.81783	0.63948	0.79389	0.61289
1.16192	0.83013		1.14251	0.62913		0.85668	1.10179	0.94192	0.73171	1.28654
0.75555	0.93355		0.77518	1.10321		0.62042	1.06287	0.72597	0.47387	1.22467
0.97227	0.75093		1.25026	0.71622		0.57723	0.88993	0.91849	0.8508	1.73351
1.16903	1.06998		0.76905	1.08779		0.72843	0.85899	0.82065	0.66334	1.31661
1.0533	1.40829		0.96028	1.09451		0.83988	1.15053	0.68009	0.92457	0.94497
1.08259	0.6585		1.0337	1.07594		0.59232	0.85416	1.03141	0.80508	1.18259
0.87845	0.55585		0.8307	1.15975		0.91154	0.94798	0.7489	0.95564	0.77798
0.93961	0.86105		0.9618	1.00151		0.40937	0.98005	0.68745	1.29427	1.18468
1.03623	1.0346		1.13969	1.08928		0.79496	1.16056	0.73731	1.00096	0.96543
0.68527	1.01072		0.87143	1.02363		0.88612	0.92197	1.09645	0.52866	1.07998
1.06207	0.83558		0.91387	0.84318		0.89941	1.01695	0.61991	0.58878	1.06928
0.98405	0.86813		0.70747	1.06019		0.86414	0.97812	2.77142	0.74525	0.88064
1.05334	0.93069		1.03968	0.92967		0.88962	0.62079	0.9853	0.7989	1.2493
1.05296	0.97035		0.62639	0.94635		0.7482	0.89006	0.73296	0.68482	0.98203
0.86076	0.709		1.01167	0.94641		0.94338	1.09864	0.78499	0.64361	1.0291
1.05187	0.75785		0.79064	0.97494		0.85375	1.2845	1.0427	0.55141	0.57923
1.19422	0.94256		0.93444	0.97845		0.81137	0.7056	0.72354	0.90586	1.13799
0.09908	0.9223		0.86388	0.89602		0.87983	1.066	0.9527	0.75868	1.07555
0.95976	0.9504		0.85417	0.87757		0.89299	0.94073	0.829	0.89024	1.26284
1.24004	0.9832		0.9666	0.62914		0.76898	1.12482	1.0281	0.59916	0.49905
1.16004	0.87361		0.62326	1.1173		0.82739	0.83754	0.92295	1.0891	0.92868
0.92136	1.00966		0.97187	1.07869		0.96632	0.96953	0.6394	0.68046	0.91691
0.66107	0.91508		0.85939	0.99539		0.77128	0.47678	0.97026	0.68776	1.21629
1.13347	0.92005		1.40841	0.98728		0.82512	0.65773	0.93514	0.70568	1.10149
0.7596	0.97241		0.8723	0.86418		0.80405	0.99005	0.9461	0.64546	0.72979
0.94974	0.72146		0.84361	1.10629		0.70837	0.44146	0.95963	0.82732	0.9695
0.7295	1.06228		1.10076	1.05941		0.79635	0.93572	0.81936	0.88218	0.94422
1.03487	0.9114		0.98858	0.91569		0.68318	0.9173	0.89608	0.98794	1.35173
0.76335	0.94721		0.89677	1.05102		1.04158	4.39109	0.85965	0.74761	1.23254
1.07172	0.82625		1.03445	0.93457		0.8378	1.02639	0.94243	1.39625	1.04537
0.98436	1.09135		0.92622	1.14744		0.88438	0.71439	1.82338	0.9269	0.98011
1.07494	0.94726		0.65981	0.94861		0.73329	0.802	0.97362	0.73558	1.19717
0.88019	0.97153		0.84536	0.98298		0.73963	0.89591	0.95822	0.59131	1.14275
1.06417	0.8711		0.91286	1.07023		0.92202	0.96026	0.84536	0.86308	1.35814
0.74321	0.79615		0.89498	1.17497		0.80958	0.70919	0.91322	0.81978	1.13675
1.00766	0.86351		0.8481	0.81517		0.82282	1.05862	0.95877	0.85607	0.3674
1.17712	0.84141		0.81455	1.14643		1.94505	0.79703	0.92664	0.79665	1.243
0.95679	0.68437		0.99073	1.15393		1.12514	1.15168	1.03141	0.71131	1.20252
1.14601	1.02172		0.98632	0.69268		1.09606	1.23255	0.55038	0.60721	1.21867
0.91634	0.9622		0.7512	0.99244		0.85073	0.9945	0.81616	0.24317	1.22477
1.23542	0.55049		1.00887	0.9779		0.6191	0.66775	0.77816	0.81439	1.32605
1.12019	0.80093		1.06151	1.04381		0.93037	0.75382	0.97038	0.8165	1.49666
0.91874	0.84179		1.16975	0.93948		0.76094	0.951	0.53065	0.81935	1.15054
1.07353	1.0044		0.8251	0.76746		0.74901	0.94121	0.97063	0.73977	1.23106
1.1233	0.82177		1.02777	1.01729		0.57739	0.57142	0.79399	0.80612	1.06599
1.00249	1.53259		0.70051	0.91683		0.86567	0.91945	1.1295	0.73939	1.19667
1.03745	0.90172		0.71415	0.71657		0.79414	0.60513	1.41526	0.80839	0.92007
1.10867	1.03847		0.89355	1.01036		0.731	0.87019	1.17652	0.60938	1.42006
0.83856	0.75044		0.81452	0.9252		0.62687	0.97694	0.87328	0.6572	0.77225
0.80058	1.07893		1.04292	0.92673		0.87217	1.00267	0.71439	0.56188	1.23018
0.72021	0.9889		0.95743	0.75801		0.81114	0.95329	0.73363	0.82325	1.16604
1.25627	0.25333		0.4686	1.318		0.86768	0.96366	1.01006	0.68704	0.6878
1.08769	0.78733		0.77745	0.9737		0.90828	0.8686	0.92397	0.93963	1.25468
1.11115	0.87455		1.307	0.87275		0.64563	0.97167	0.68556	1.04897	1.21112
1.09289	0.70496		1.0006	0.9857		0.80185	0.98385	0.96601	1.36175	1.53292
1.09079	0.73235		1.18997	0.79945		0.973	0.95513	0.73927	0.61816	1.05242
0.86213	0.95434		0.76982	0.93822		0.93093	0.99933	1.06006	0.24539	1.01134
1.00002	0.62683		0.96253	0.91633		0.92619	0.4908	2.54418	0.87562	0.62878
0.941	0.42867		0.8685	0.93625		0.81474	0.92941	0.71761	0.43069	1.29312
1.07441	0.93275		1.16832	1.03463		0.81208	0.69798	0.70096	0.86442	1.25086
0.96263	1.03797		0.98302	0.9001		0.81014	0.89164	0.56855	0.77588	1.42748
0.79997	0.93302		0.98513	0.75877		0.86722	1.14377	0.98389	0.76788	0.54085
0.97533	0.91998		0.93898	0.88473		1.0315	0.81933	0.95951	0.68456	1.17024
0.98474	1.4956		0.81354	0.98141		0.7123	0.90285	0.90135	0.59178	1.00701
0.94402	1.02084		0.76402	1.00431		0.95461	1.01813	0.64827	0.90557	1.14179
0.91621	0.7815		1.07363	0.88032		0.86183	1.09352	0.86803	0.7513	1.13865
0.96852	0.97574		0.86345	0.39671		0.92449	0.84562	1.00328	0.74103	0.63223
1.04457	1.847		0.90806	0.49368		0.93438	1.18153	1.03208	0.51475	1.17793
0.91478	0.64957		0.94243	1.11578		0.86046	0.58313	0.85216	0.72569	1.09481
0.7315	0.99902		0.83773	0.8732		0.77815	1.02968	0.8914	0.98652	1.1431
0.94981	0.98604		1.05633	1.03194		0.87764	1.00425	1.09191	0.62612	0.92915
0.94531	0.95597		0.94931	1.08602		0.83835	0.90326	0.81076	1.01889	1.00093
0.89744	0.93007		0.77688	1.04273		0.72811	0.76912	0.97563	1.02619	1.24078
1.1203	0.93304		0.98407	0.96059		0.88129	0.95278	0.85156	0.84823	1.26052
0.88682	0.9418		0.67769	0.99421		0.74532	0.99716	0.96165	0.61197	1.29489
1.04639	0.67754		1.0482	0.97287		0.60681	1.10012	0.69345	0.61977	1.67571
1.01207	0.95042		1.125	0.90273		0.72553	1.09775	0.82385	0.84348	1.24509
1.08344	0.77375		0.80432	1.06966		0.573	0.91494	0.88722	0.54663	1.21525
0.98533	0.98882		0.92495	1.01105		0.92979	1.08631	0.89657	0.87357	1.63992
1.0221	0.9332		0.99355	0.99198		0.92173	0.8954	0.51449	0.82115	0.88354
0.63799	1.09887		1.15768	1.01028		0.81683	0.84203	0.77514	0.56608	1.34313
0.95462	0.6937		1.08922	0.95918		0.78076	0.63548	0.90965	0.66082	0.92664
0.94519	0.9084		1.07327	0.74618		0.95147	1.12499	1.09941	0.89553	1.14897
0.96513	0.94801		0.86317	1.04521		0.25538	0.96915	0.53718	0.71687	1.20677
0.96454	1.07874		0.86881	0.80852		0.81908	0.79823	0.84902	0.87328	0.8222
0.84813	1.09062		0.51784	0.87888		0.92083	0.85252	0.55284	0.49257	1.29256
0.87545	0.74398		0.94433	0.8249		0.91413	0.82936	0.72738	0.79471	0.99779
1.19434	0.87472		0.71348	0.85427		0.78449	0.98243	0.82373	0.43647	1.01647
1.00486	0.97157		0.70247	0.94472		0.511	0.7408	0.99263	0.5424	0.90497
1.02583	1.01765		0.6864	0.8429		0.86004	0.94317	0.98275	0.78172	1.34978
1.01083	0.96938		0.86722	1.14125		0.97533	0.71012	0.85529	0.7025	0.90595
1.14548	0.85561		1.0165	0.84434		0.459	0.73047	1.09884	1.00702	1.22352
1.09623	0.84272		0.92813	0.99965		0.69297	0.87267	0.98276	0.87009	1.15522
1.05473	1.10945		1.00655	1.07007		0.84905	2.0161	0.68369	0.75655	0.83963
0.9022	0.98451		0.79288	0.95504		0.92649	1.01702	1.04788	1.06005	1.61743
1.09074	0.96016		0.88204	1.05852		0.78918	1.10161	0.9751	0.83778	0.76297
1.34122	0.82381		0.77015	0.91849		0.71659	1.03097	1.14552	0.90708	0.91775
0.85917	0.36719		0.8538	0.78522		1.30527	1.08523	0.82466	0.5043	1.11424
1.20377	0.73977		0.81718	1.18342		0.53023	0.9115	0.96733	0.87213	1.14719
0.69053	0.87938		0.71221	0.68276		0.91742	1.12966	0.88931	0.7984	0.91625
0.99092	0.93481		0.84368	1.06328		0.69967	0.74842	2.91258	0.50736	0.8369
0.95584	0.92414		0.90006	1.10738		0.59037	1.49628	0.87067	0.79061	1.09788
1.12386	0.85833		0.77798	1.06869		0.59251	1.09801	1.04056	0.52137	1.17726
0.88839	1.10746		0.88273	0.69915		0.68741	0.94211	0.95167	0.77895	1.0918
1.06536	0.8532		0.97878	1.08675		0.75823	0.67066	0.76421	0.70052	0.60961
1.08668	0.90589		1.07134	0.99173		0.77908	0.83316	0.68014	0.70543	0.63956
1.07222	0.90521		0.99944	1.09266		0.67952	0.88785	0.69657	0.643	0.59208
0.96918	0.86332		1.04043	0.62273		0.8386	0.93282	0.83395	0.62452	1.14591
0.86949	0.89845		1.0535	0.89785		0.84921	0.70664	0.87589	0.92371	1.30758
0.91237	0.95141		0.83164	0.99324		0.7512	0.94366	0.85882	0.56188	1.10442
1.0558	0.57991		0.99945	0.93674		0.78134	1.06157	0.94824	0.70818	1.26952
1.23321	0.80592		0.92092	0.65585		0.80757	0.66335	0.89053	0.80638	1.25365
1.11556	0.88613		1.03709	0.80163		0.95832	0.8698	1.05411	0.28468	0.91844
0.96918	0.91815		0.85201	0.82623		0.35584	0.58269	0.80316	1.08515	2.05578
0.80152	0.6837		0.80058	1.02241		1.00276	0.93476	0.82821	0.80751	1.07246
1.04385	0.89977		1.08617	0.59377		0.79507	0.89271	0.81064	0.93163	1.16983
1.21014	0.64699		0.8588	0.73386		0.89807	0.83856	0.52596	0.93312	1.11056
1.08482	0.83705		1.13565	0.67929		0.91893	0.65696	0.67806	0.72255	0.63305
0.48555	0.83108		0.83315	0.9592		0.87696	0.90026	0.88278	0.94188	0.5732
0.93499	0.82157		0.66792	0.93452		0.60708	0.90623	1.10081	0.73818	1.16574
0.95759	1.01497		1.02194	0.88947		0.74744	0.76339	0.78956	0.49085	0.69974
0.78037	0.8983		0.44793	0.86446		0.8023	0.83481	1.02267	0.44317	1.20394
0.6116	0.73262		1.07724	0.71161		0.52916	0.97023	1.0156	0.73412	0.97406
0.90553	0.80008		0.43994	0.50524		0.80457	0.97661	0.90308	0.98283	0.85935
1.1017	0.88125		0.85404	0.83744		0.80984	1.13499	0.82764	0.40591	1.06691
1.02672	0.89459		0.98854	1.03184		0.73937	1.02872	0.93571	0.63116	1.33932
1.00579	0.92629		1.10157	1.10577		0.87517	0.89137	1.01129	0.89277	1.15723
0.99577	0.82791		0.90683	0.91067		0.79072	1.10692	1.13084	1.14609	0.84252
0.98245	0.99254		1.17756	0.93558		0.8536	0.90925	0.90993	0.7743	0.66214
1.03117	0.88022		2.32778	0.97813		0.79472	0.93285	0.80451	0.45554	0.81086
0.87324	1.01151		0.95755	1.09374		0.4752	0.96095	0.88274	0.67147	1.01573
1.05735	0.856		0.65755	0.45367		0.9532	1.26548	0.5703	1.07659	1.15812
1.20214	0.84303		1.13717	1.0063		0.80998	0.92972	0.78279	0.43772	1.04064
0.7153	0.5002		0.97497	0.97256		0.95434	1.03339	0.94309	0.92226	1.26807
1.0676	1.10149		0.68169	0.91594		0.62761	0.73971	0.89052	0.89361	2.27551
0.98065	1.3899		1.12747	1.02335		0.86288	1.05186	1.05465	0.29972	1.30747
1.17507	0.9955		0.9434	0.99782		0.53233	0.32475	0.65502	0.73485	1.13156
1.29849	1.00991		0.91847	0.74919		0.89002	0.78935	1.00843	0.6336	0.68976
0.95217	1.11721		1.11606	1.00543		0.81984	1.1872	0.30627	0.63736	0.91205
0.94418	0.79747		0.99958	0.93229		0.97384	0.88434	0.74439	0.63425	1.14895
0.93959	0.82293		1.04777	1.06964		0.76682	0.74076	0.99674	0.87399	1.0549
0.98489	0.79792		0.82502	1.20641		0.41553	0.98184	0.97141	0.85622	1.13131
1.00811	1.03327		0.98437	0.73727		0.82972	0.91254	0.91896	0.76361	0.99453
1.19501	1.02592		0.95988	1.01746		0.79856	0.84122	0.91837	0.66472	1.18579
1.05313	0.72279		0.87106	0.79631		0.86167	0.89989	1.01814	0.93334	1.26079
1.08902	0.96109		1.06439	0.90622		0.84069	0.77493	0.7844	0.83622	1.21506
0.85527	0.94359		0.95761	1.11069		0.85748	0.81447	1.03548	0.60835	1.74307
1.01459	0.98692		1.05329	0.64636		0.95412	0.73907	0.64506	0.71417	1.22769
1.12902	0.81221		0.86749	1.15596		0.87424	0.82737	1.5279	0.74741	1.01605
0.61351	0.76902		0.91599	0.82016		0.79238	0.90018	0.72788	1.10887	1.07346
1.08611	0.83079		1.13927	0.64976		0.80455	0.6616	0.84751	0.8015	1.10606
1.12706	1.00383		1.22891	0.94076		0.75367	1.04629	0.62138	0.71155	1.05902
0.93016	1.07617		0.75208	0.52642		0.90125	4.24143	1.02472	0.46498	1.16808
0.90424	0.70413		1.00417	0.86786		0.47693	1.01362	0.82111	0.65398	1.04086
1.02174	0.84335		1.11064	1.01085		0.77816	0.58472	0.84138	0.73737	1.66151
0.88223	0.85731		1.15829	0.90986		0.85836	0.56358	0.90581	0.67382	1.24493
1.08725	0.73435		1.02056	0.9042		0.59659	1.05267	0.60329	0.80088	1.05128
0.73378	1.4676		1.05634	1.18454		1.0489	1.05393	0.84657	3.68783	0.93481
[truncated: 5,544 more rows]

## Sheet: NADP_mito
Control	NA	NMN	NR	FK866	Metformin	Phenformin	Rotenone	Oligomycin A				Control	NA	NMN	NR	FK866	Metformin	Phenformin	Rotenone	Oligomycin A
[truncated: 9,156 more rows]
