# Supplementary material for: Semisynthetic biosensors for mapping cellular concentrations of nicotinamide adenine dinucleotides
Source: eLife. 2018 May 29;7:e32638. doi: 10.7554/eLife.32638 (PMC5990361; doi:10.7554/eLife.32638)
Supplement: Figure 2—source data 1. [file elife-32638-fig2-data1.xlsx]

## Sheet: Figure_2a
Emission spectra of NADP-Snifit titrated with NADP+
[NADP+]	100 uM	20 uM	4 uM	0.8 uM	160 nM	32 nM	6.4 nM	1.28 nM
Wavelength (nm)	Intensity (a.u.)
542	1892	1960	1995	2100	2535	3064	3270	3429
543	1830	1815	2025	1997	2581	3222	3480	3536
544	1849	1751	1954	2147	2732	3417	3687	3845
545	2002	1882	2045	2226	2761	3549	4067	4192
546	2113	1933	2128	2458	3061	4042	4466	4649
547	2139	2174	2371	2575	3416	4318	4902	5146
548	2385	2276	2482	2767	3599	4834	5423	5657
549	2519	2407	2732	3086	3898	5508	6148	6191
550	2612	2592	3028	3364	4361	6109	6705	7005
551	3046	2939	3263	3700	4951	6763	7810	8012
552	3222	3103	3473	3871	5352	7514	8344	8713
553	3552	3321	3956	4430	6052	8383	9267	9543
554	3802	3682	4173	4789	6422	8971	10160	10333
555	4114	4012	4533	5083	7121	10057	11339	11647
556	4479	4431	5005	5762	8004	11066	12583	12679
557	4838	4646	5258	5966	8424	12015	13559	13666
558	5217	5005	5719	6578	9334	13281	14827	15278
559	5735	5422	6266	7299	9959	14406	16432	16418
560	6118	5826	6706	7771	11079	15196	17388	17735
561	6538	6209	7227	8268	11629	17019	19038	19378
562	7049	6726	7751	8950	12723	17957	20744	21050
563	7412	7099	8183	9553	13555	19175	22129	22294
564	7874	7547	8570	10051	14310	20560	23336	23749
565	8273	7938	8895	10663	15310	22039	25075	25071
566	8565	8330	9457	11056	16087	22953	25789	26244
567	9036	8555	9898	11571	17029	24391	27593	27771
568	9560	8896	10285	12206	17763	25498	28643	29715
569	9846	9195	10795	12616	18544	26689	29767	30391
570	10122	9482	10923	13081	19079	27224	30858	31910
571	10299	9908	11454	13604	19759	28614	32694	32820
572	10375	10047	11700	13838	20548	29116	33352	33602
573	10718	10178	11951	13985	20894	29960	34337	34387
574	10857	10613	12238	14097	20917	30595	35284	35315
575	11129	10494	12236	14339	20920	31194	35415	35907
576	11209	10838	12299	14518	21329	31293	35915	36170
577	11228	10726	12527	14777	21749	31761	35815	36087
578	10918	10573	12384	14722	21655	31745	36299	36273
579	11206	10858	12383	14662	21614	31791	36241	36875
580	11048	10411	12184	14498	21718	31809	36363	36345
581	11014	10389	12286	14473	21699	31509	35911	36573
582	10902	10326	11875	14334	21053	31040	35393	35580
583	10620	10131	11746	14232	21025	30637	34513	35409
584	10489	9797	11427	13740	20609	30192	34203	34746
585	10354	9733	11280	13448	19954	29463	33536	34152
586	9901	9454	11064	13134	19844	29025	33402	33871
587	9707	9255	10668	12808	19117	27838	32215	32395
588	9425	9005	10333	12455	18259	26950	31322	31180
589	9175	8704	9942	12007	18085	26483	30648	30452
590	8833	8354	9694	11794	17618	25471	29537	29786
591	8546	8080	9454	11207	16865	24474	28608	28574
592	8166	7777	9160	10715	16356	23815	27778	27531
593	7863	7517	8860	10337	15895	22907	26397	26889
594	7477	7194	8377	9938	14908	22171	25321	25587
595	7322	6948	7995	9886	14656	21293	24613	24823
596	7056	6560	7790	9419	14050	20585	23500	23494
597	6733	6407	7409	8694	13150	19544	22392	22518
598	6415	6111	7153	8631	12630	18568	21724	22287
599	6378	5949	6881	8016	12312	18207	20880	20970
600	5875	5643	6795	7802	11762	17389	19787	20117
601	5627	5212	6145	7291	10996	15756	18351	18557
602	5217	5053	5917	7193	10487	15311	17847	17986
603	5018	4838	5779	6912	10096	14909	17223	17023
604	4957	4650	5348	6402	9896	14254	16281	16419
605	4719	4623	5333	6266	9197	13643	15839	16023
606	4583	4532	5102	6045	9105	13281	15018	15392
607	4534	4107	4958	5854	8664	12894	14454	14826
608	4196	4044	4634	5644	8215	12016	13833	13847
609	4190	4020	4501	5407	8206	11772	13580	13724
610	3940	3816	4310	5169	7805	11241	12659	13213
611	3742	3706	4359	5098	7438	11010	12519	12504
612	3645	3594	4243	4933	7136	10474	12011	11808
613	3542	3376	3942	4669	7187	10111	11737	11736
614	3449	3418	3849	4712	6653	10059	10990	11275
615	3454	3309	3826	4436	6557	9626	10910	10902
616	3324	3143	3744	4287	6478	9402	10476	10517
617	3367	3062	3682	4277	6444	9087	10206	10554
618	3185	3134	3605	4222	6268	8777	10011	10155
619	3198	3049	3494	4111	6015	8630	9726	9936
620	3218	2976	3464	3958	5858	8520	9509	9727
621	3129	3069	3349	4065	5878	8257	9489	9333
622	3114	2847	3256	3965	5615	8043	9185	9175
623	3062	2862	3313	3917	5632	7779	9007	9147
624	2970	2819	3313	3870	5410	7661	8867	8889
625	3104	2814	3268	3759	5346	7678	8635	8669
626	3059	2878	3311	3627	5340	7463	8341	8503
627	2987	2819	3234	3613	5190	7232	8393	8343
628	3153	2962	3309	3728	5269	7504	8241	8312
629	3002	2885	3350	3852	5137	7281	7998	8127
630	3285	2893	3321	3779	5200	6960	7876	8102
631	3272	2991	3377	3807	5057	6987	7715	7903
632	3252	3092	3454	3910	5246	6992	7707	7722
633	3431	3115	3397	3875	5195	6846	7462	7533
634	3426	3192	3576	4019	5142	6771	7364	7255
635	3629	3420	3809	4172	5039	6792	7400	7176
636	3737	3525	3902	4149	5223	6609	7201	7262
637	3903	3728	4131	4225	5169	6678	7177	7004
638	4323	4035	4380	4433	5454	6569	7136	7016
639	4449	4199	4498	4718	5482	6514	7268	7035
640	4834	4550	4937	5104	5611	6678	6979	7017
641	5316	4851	5453	5408	5852	6738	6724	6747
642	5714	5221	5641	5673	6087	6728	7043	6710
643	5883	5665	6119	5876	6287	6728	6988	6764
644	6530	6250	6563	6502	6754	7089	7004	7033
645	7194	6762	7121	6943	6947	7148	6855	6744
646	7993	7363	7841	7610	7484	7422	7007	6759
647	8701	8110	8453	7991	7917	7440	7103	7028
648	9339	8683	9390	8879	8388	7911	7278	6979
649	10419	9624	10130	9671	8871	8016	7436	7075
650	11103	10476	10869	10063	9367	8428	7386	7274
651	11895	11149	11658	11019	9859	8616	7814	7177
652	12829	11871	12656	11832	10609	9015	8038	7454
653	13813	13237	13542	12839	11229	9227	8044	7375
654	15158	14136	14843	13536	11855	9509	8343	7760
655	16089	15405	15613	14575	12655	10240	8459	7910
656	16783	15999	16252	15023	13088	10421	8560	7901
657	17996	16477	17562	16209	13668	10574	8811	8162
658	18766	17843	18326	16680	14159	10962	9014	8071
659	20009	18698	19327	17622	14954	11299	9088	8387
660	20766	19334	19967	18382	15525	11267	9367	8407
661	21082	20329	20946	19055	16155	12031	9428	8688
662	21908	20604	21146	19400	16155	11991	9563	8630
663	22563	21291	22099	19965	16570	12180	9661	8891
664	23172	21674	22154	20341	16885	12646	9482	8759
665	23567	21934	22771	20244	17161	12516	9748	8790
666	23933	21961	22772	20531	17278	12452	9756	8736
667	23929	22456	22605	20713	17219	12216	9592	8629
668	23596	21884	22865	21223	17119	12380	9422	8633
669	23567	21978	22759	20646	17015	12252	9371	8637
670	23582	21883	22161	20096	17267	11958	9240	8381
671	23089	21976	22392	20035	16529	11752	9009	8074
672	22742	21049	21674	19862	16129	11551	8816	7895
673	22056	20912	21446	19498	15908	11404	8411	7769
674	21684	19971	20718	18930	15274	11010	8311	7573
675	20819	19786	20098	18311	14982	10483	7954	7041
676	19998	18926	19551	17737	14256	10213	7916	7070
677	19156	18181	18845	17273	13996	9875	7461	6730
678	18862	17405	17834	16389	13210	9865	7328	6300
679	17810	16496	17565	15678	12815	8935	7004	6237
680	17058	15687	16502	14834	12138	8589	6480	5987
681	16270	15304	15576	14263	11696	7867	6247	5721
682	15329	14346	14744	13467	10823	7689	5920	5416
683	14733	13872	14124	12575	10505	7545	5714	5121
684	13744	12960	13397	11879	9696	7183	5467	4873
685	13273	12125	12362	11124	9217	6488	5125	4619
686	12250	11250	11892	10947	9081	6175	4869	4433
687	11566	10559	10887	9897	8596	6075	4589	4172
688	10827	10155	10703	9580	7855	5590	4370	3995
689	10237	9616	9884	9171	7367	5438	4155	3659
690	9466	8919	9317	8355	7045	5142	3992	3622
691	8905	8432	8688	7847	6598	4642	3646	3280
692	8647	7898	8275	7406	6282	4490	3531	3140
693	8006	7302	7576	6775	5598	4208	3288	2954
694	7692	6972	7049	6583	5529	3877	3107	2887
695	6985	6634	6813	6209	5322	3802	3022	2568
696	6766	6147	6414	5812	4854	3652	2868	2727
697	6197	5650	5855	5382	4498	3446	2675	2383
698	5915	5514	5576	5234	4355	3294	2540	2394
699	5472	5278	5455	5044	4208	3026	2466	2250
700	5355	4814	5129	4696	3869	2946	2369	2009
701	4940	4590	4786	4505	3587	2725	2179	2001
702	4806	4373	4653	4069	3473	2509	2086	1964
703	4479	4213	4283	3926	3259	2516	2073	1860
704	4276	4076	4111	3806	3208	2430	1895	1827
705	4239	3725	4111	3715	3134	2308	1880	1599
706	4008	3595	3745	3469	3012	2244	1875	1609
707	3723	3520	3736	3305	2838	2108	1684	1625
708	3607	3407	3524	3209	2550	2035	1564	1485
709	3635	3362	3410	3155	2625	1951	1634	1500
710	3441	3191	3348	3095	2559	1978	1594	1497
711	3350	3086	3140	2931	2412	1826	1572	1329
712	3229	2920	3076	2867	2491	1864	1494	1380
713	3023	2910	3003	2682	2289	1802	1433	1256
714	3000	2799	2954	2660	2226	1650	1407	1233
715	2984	2762	2899	2640	2241	1668	1307	1191
716	2889	2726	2797	2637	2168	1690	1304	1138
717	2810	2630	2743	2541	2188	1547	1286	1135
718	2747	2556	2752	2407	2058	1612	1271	1147
719	2830	2565	2613	2373	1930	1542	1202	1118
720	2711	2498	2631	2405	1927	1544	1232	1100
721	2653	2499	2644	2360	1983	1500	1216	1119
722	2747	2556	2522	2365	1965	1532	1146	1098
723	2624	2426	2538	2178	1917	1435	1182	1056
724	2518	2497	2508	2331	1978	1405	1124	973
725	2519	2383	2478	2274	1826	1396	1073	989
726	2603	2436	2525	2220	1818	1378	1094	1017
727	2524	2329	2447	2254	1876	1332	1053	965
728	2555	2321	2482	2244	1877	1364	1101	1028
729	2561	2337	2544	2206	1831	1386	1075	993
730	2596	2294	2471	2205	1790	1302	1074	950
731	2493	2305	2448	2128	1839	1315	1062	966
732	2599	2285	2355	2218	1742	1314	1054	1002
733	2512	2386	2366	2244	1829	1334	999	935
734	2479	2312	2362	2297	1741	1253	1004	900
735	2433	2283	2370	2099	1743	1301	1059	955
736	2469	2222	2391	2088	1673	1251	949	906
737	2454	2218	2422	2063	1816	1235	1005	868
738	2535	2108	2280	2010	1714	1294	976	920
739	2320	2181	2369	2103	1678	1240	986	860
740	2429	2190	2287	2052	1674	1208	984	832
