# Supplementary material for: Semisynthetic biosensors for mapping cellular concentrations of nicotinamide adenine dinucleotides
Source: eLife. 2018 May 29;7:e32638. doi: 10.7554/eLife.32638 (PMC5990361; doi:10.7554/eLife.32638)
Supplement: Figure 2—source data 2. [file elife-32638-fig2-data2.xlsx]

## Sheet: Figure_2b
Raw data
	pH 6.8		pH 7.0		pH 7.2		pH 7.5		pH 8
[NADP+] (M)	Ratio (TMR/SiR)	SD	Ratio (TMR/SiR)	SD	Ratio (TMR/SiR)	SD	Ratio (TMR/SiR)	SD	Ratio (TMR/SiR)	SD
0.0001	0.440956	0.00794633	0.464595	0.0211894	0.480877	0.014909	0.524139	0.0126968	0.592077	0.0163528
1e-05	0.461836	0.0147881	0.472764	0.0156224	0.504235	0.0136231	0.528513	0.0141904	0.634315	0.012949
1e-06	0.531467	0.00401582	0.552045	0.0113483	0.618044	0.0156308	0.655869	0.0054698	0.837723	0.0105246
2e-07	0.717335	0.00494865	0.786031	0.0277198	0.872818	0.0146947	0.979195	0.131403	1.41058	0.0303806
4e-08	1.42435	0.0450706	1.46875	0.0362921	1.7356	0.0532104	1.98901	0.0601627	2.72216	0.0658447
8e-09	2.75034	0.0951845	2.76887	0.0985741	3.08219	0.064235	3.56163	0.0280636	4.10791	0.00957069
8e-10	3.65831	0.0749232	3.89572	0.109805	4.04539	0.0271357	4.33801	0.059439	4.88215	0.159991
8e-11	3.78317	0.0966264	4.02586	0.0608764	4.42117	0.062266	4.61023	0.275328	5.03059	0.135235
Normalization
	pH 6.8		pH 7.0		pH 7.2		pH 7.5		pH 8
[NADP+] (M)	Normalized ratio (TMR/SiR)	SD	Normalized ratio (TMR/SiR)	SD	Normalized ratio (TMR/SiR)	SD	Normalized ratio (TMR/SiR)	SD	Normalized ratio (TMR/SiR)	SD
0.0001	1	0.0180207	1	0.0456083	1	0.0310038	1	0.0242242	1	0.0276195
1e-05	1.04735	0.0335364	1.01758	0.0336258	1.04857	0.0283296	1.00835	0.0270738	1.07134	0.0218705
1e-06	1.20526	0.00910708	1.18823	0.0244262	1.28524	0.0325047	1.25133	0.0104358	1.41489	0.0177757
2e-07	1.62677	0.0112226	1.69186	0.0596645	1.81505	0.0305581	1.8682	0.250704	2.38243	0.0513118
4e-08	3.23014	0.102211	3.16137	0.0781157	3.60924	0.110653	3.79482	0.114784	4.59764	0.11121
8e-09	6.23721	0.215859	5.95975	0.212172	6.40951	0.133579	6.79519	0.0535424	6.93814	0.0161646
8e-10	8.29631	0.169911	8.38521	0.236345	8.41252	0.0564296	8.27644	0.113403	8.2458	0.27022
8e-11	8.57948	0.219129	8.66531	0.131031	9.19398	0.129484	8.79583	0.525297	8.4965	0.228407

## Sheet: pH 6.8
Application: Tecan i-control				Tecan i-control , 1.11.1.0
Device: infinite M1000				Serial number: 806003044
Firmware: V_2.09_04/2011_S3LCE (May 2 2011/09.25.56)				MAI, V_2.09_04/2011_S3LCE (May 2 2011/09.25.56)
Date:	29.04.2016
Time:	22:48:29
System				ISIC-JOHNSSON-7
User				ISIC-Johnsson-7\Group Johnsson
Plate				Greiner 96 Flat Bottom Black Polystyrene Cat. No.: 655079/655086/655077/655076 [GRE96fb_chimney.pdfx]
Plate-ID (Stacker)
Label: Label1
Mode				Fluorescence Top Reading
Emission Wavelength Start				540	nm
Emission Wavelength End				740	nm
Emission Wavelength Step Size				1	nm
Emission Scan Number				201
Excitation Wavelength				520	nm
Bandwidth (Em)				280...850: 10 nm
Bandwidth (Ex) (Range 1)				230...300: 5 nm
Bandwidth (Ex) (Range 2)				301...850: 10 nm
Gain				170	Manual
Number of Flashes				30
Flash Frequency				400	Hz
Integration Time				20	µs
Lag Time				0	µs
Settle Time				0	ms
Z-Position (Manual)				20200	µm
Part of Plate				A1-H3
Start Time:	29.04.2016 22:49:01
	Temperature: 25.3 °C
Wavel.	540	541	542	543	544	545	546	547	548	549	550	551	552	553	554	555	556	557	558	559	560	561	562	563	564	565	566	567	568	569	570	571	572	573	574	575	576	577	578	579	580	581	582	583	584	585	586	587	588
A1	4221	3741	2917	2337	2247	2108	2170	2150	2088	2297	2466	2621	2680	2791	3245	3318	3900	4086	4421	4771	5101	5419	5876	6135	6379	6697	7351	6841	7420	7728	8089	8680	8630	8379	8921	9214	9111	9167	9238	8536	9200	8747	8704	8688	8178	8293	8245	7862	7867
A2	4969	3298	2881	2640	2363	2095	2173	2240	2246	2443	2465	2975	2847	3024	3338	3565	3886	4311	4460	4818	5166	5395	5679	6259	6826	6824	7445	7588	7653	8286	8395	8670	8692	9114	9315	8915	9473	9307	9413	9378	8813	9085	9271	9447	8845	8531	8130	7964	7694
A3	5056	3579	2685	2625	2244	2225	2078	2155	2340	2347	2313	2719	2948	2892	3332	3587	4098	3917	4719	4964	5055	5456	5994	5814	6510	6680	7270	7506	8132	8195	8225	8558	8264	8684	8859	9447	9345	8973	9343	9309	9240	9321	9408	8968	8340	8381	8208	7831	7462
B1	5370	3530	2842	2720	2533	2130	2013	2132	2435	2575	2700	2810	2843	3396	3595	3932	3894	4417	4624	5115	5499	5927	6263	6835	7106	7453	7679	7722	8087	8404	8591	9121	9158	9429	9756	9771	10018	9958	9606	9625	9740	9851	8959	8987	8978	8847	8545	8466	7818
B2	5021	3503	3125	2447	2467	2279	1997	2386	2403	2540	2534	2997	3034	3281	3483	3687	4055	4322	4508	5082	5294	5643	6474	6644	7076	7479	7558	8221	8204	8573	8664	9143	9141	9270	9462	9924	9660	9945	10230	9460	9602	9640	9091	9140	9453	8536	8697	8673	8079
B3	5307	3604	3036	2564	2424	2015	2208	2293	2158	2257	2546	2595	2861	3057	3406	3434	4099	4424	4611	4926	5251	5628	6439	6301	6492	7212	7764	7787	8239	8401	8885	8737	9028	9118	9328	9119	9489	9459	9809	10016	9888	9332	9450	9095	8564	8820	8398	8371	8060
C1	5194	3774	2966	2669	2612	2302	2369	2351	2444	2574	2940	2988	3309	3381	3754	4059	4482	4853	5027	5519	5654	6190	7050	7227	7891	7680	8184	9069	9231	9478	9834	10077	10219	10210	10652	10732	10791	10800	10848	10414	10796	10517	10536	10422	10788	10006	9714	9185	9279
C2	5124	3707	3139	2589	2504	2067	2414	2290	2494	2678	2815	3026	3249	3796	3937	4247	4564	4971	5108	5361	5817	6604	7363	7213	7789	8072	8623	8901	9197	9578	10066	10429	10733	10429	10977	10943	10951	11069	11340	11151	10963	10820	10701	10444	10144	10206	9638	9535	9218
C3	5163	3430	2932	2663	2319	2299	2141	2237	2298	2705	2735	3029	3276	3541	3789	4255	4323	4874	5019	5684	5803	6227	6980	7202	7458	7735	8295	8920	9150	9515	9563	10166	10208	10601	10486	11379	10933	10865	10665	10668	10894	10587	10324	10222	10326	9818	9606	9101	9147
D1	5463	3826	3240	2760	2503	2726	2543	2899	2980	3033	3271	3771	3784	4092	4570	4910	5446	5942	6346	6733	7425	7952	8297	9213	9726	10400	10159	11386	11519	11806	12313	12915	13111	13295	13653	13778	13877	13653	13983	13816	13946	13823	13301	13460	13261	12594	12438	12183	11889
D2	5251	3721	3213	2972	2638	2461	2626	2601	2936	3137	3183	3630	3945	4358	4347	4782	5437	5659	6222	6669	7359	7775	8280	8943	9504	10046	10847	10758	11763	11788	12366	12439	12969	13230	13738	13455	13728	13446	14071	13991	13738	14348	13267	13084	13110	12593	12509	12064	11727
D3	5353	3617	3131	3049	2757	2504	2729	2753	2854	3028	3368	3447	3855	4021	4515	4976	5233	5820	6257	6568	7237	7723	8419	8739	9314	9646	10181	10606	11096	12267	12454	12601	13318	13305	13493	13365	13511	13446	14107	13477	13504	13402	13676	13087	12940	12830	12418	12306	11763
E1	5642	4032	3784	3499	3047	3167	3469	3489	3867	3980	4372	4952	5126	6101	6735	7125	7580	8760	9218	9940	10676	11322	12390	13052	13546	14956	15415	16681	16720	17785	17818	19324	19657	20037	20628	20821	21387	20927	21649	20951	20935	21571	20769	20529	19694	20164	18978	19198	18302
E2	5560	4223	3594	3366	3154	3194	3385	3538	3572	4232	4318	4713	5090	5689	6073	6956	7382	8234	8935	9624	10812	10782	12121	12775	13686	14383	15480	16054	16738	17714	17961	19101	19597	20053	20305	20562	20589	21313	21093	20794	21100	20814	20893	20363	19391	19045	18907	18555	17748
E3	5864	4231	3530	3521	3485	3364	3364	3406	4131	4057	4421	4578	5270	5781	6185	7173	7273	8288	9095	9877	10530	11423	12357	13039	13711	14219	15527	15886	17420	17856	17917	18852	19327	20307	20310	21663	20539	21792	21377	20751	20470	20755	20289	20518	20086	19827	19326	18547	18428
F1	6693	4391	3883	3725	3621	3683	3989	4321	4901	5003	5441	6072	6876	7408	7918	9019	9940	10569	11975	12692	14019	14711	16088	17752	18488	20022	20976	21815	22602	24156	24688	25790	26342	26815	27351	28445	27843	28721	28944	28863	28972	28195	28398	27313	27173	26271	26207	25467	24251
F2	5584	4284	4092	3645	3505	3584	3833	4284	4632	4856	5337	6102	6853	7380	7655	8486	9795	9891	10693	11633	13141	14305	15549	16589	17501	18721	19987	20472	21813	22145	23801	24153	24671	25421	26027	25995	27130	26845	27518	26534	26923	26553	26429	26393	25611	25651	24864	24474	23323
F3	5930	4605	4120	3924	3932	3866	4095	4620	4653	5063	5503	6156	7146	8011	8318	9143	9883	10409	12060	13075	14223	15399	16760	18165	18555	19808	20829	22155	23458	23800	24856	25499	26516	26989	28201	28703	28916	29349	28809	28582	28569	28203	28408	27910	27568	27026	26746	25497	24458
G1	5982	4518	4312	3650	3958	4070	4414	4924	5238	5854	6275	6965	7881	8591	9151	9904	11136	12664	13380	14443	15686	16988	18651	19634	20830	22883	23544	24663	25826	27491	27577	29659	29378	30399	30796	32056	32700	32019	33073	32204	33082	32777	31966	31902	31298	30583	30158	28787	27741
G2	5956	4973	4241	4226	4043	4256	4644	4716	5218	5617	6374	7055	7750	8578	9161	10304	11276	12164	13408	14768	15905	17299	18978	20002	21050	22865	23267	24959	25951	27380	27575	29170	30031	30401	31079	31653	32082	32996	32112	32907	32178	32441	32211	31796	31143	31193	29606	29205	28539
G3	6104	4661	4112	4177	4199	4275	4142	4796	5372	5944	6534	6812	7664	8649	9396	10079	11382	12362	13261	14654	15997	16917	18440	19467	20867	22355	23647	24006	26045	26227	27254	29335	30021	30273	31016	32478	31488	33001	32433	32361	31895	31777	31368	31466	30532	30357	29183	29410	27722
H1	6082	4600	4390	4037	4017	4234	4531	5034	5593	5733	6340	7165	7789	8841	9433	10311	11229	12342	13510	14829	15669	17078	18947	19628	21143	22461	23054	24328	26395	27102	28447	29613	29863	30804	31119	31947	32499	32962	33300	33404	32802	32176	32014	32006	31002	30964	29549	29335	27813
H2	5819	4550	4214	4084	4116	4154	4588	4868	5159	5566	6475	6902	7629	8551	9207	10290	11272	12359	13333	14761	16201	16713	18270	19261	21119	22171	23761	25254	25765	27093	27768	29381	30108	30315	31831	31963	31833	32266	32830	32140	32069	32867	32300	32553	31696	30265	29718	28575	27853
H3	5688	4604	4252	3880	4340	4136	4428	4744	5120	5747	6272	6973	7468	8593	9173	10363	11188	12228	13448	14572	15736	16772	18962	19652	20430	22210	22817	24587	25260	27030	27955	29337	29632	29962	31009	32029	31854	32431	32842	32389	33060	31379	31556	31564	31234	30518	30613	28327	28130
															TMR int.	SiR int.	Ratio (TMR/SIR)			[NADP+] (M)	Mean Ratio (TMR/SIR)	SD
														A1	9167	20378	0.449848			0.0001	0.440956	0.00794633
														A2	9307	21226	0.438472			1e-05	0.461836	0.0147881
														A3	8973	20649	0.434549			1e-06	0.531467	0.00401582
														B1	9958	21235	0.468943			2e-07	0.717335	0.00494865
														B2	9945	21082	0.471729			4e-08	1.42435	0.0450706
														B3	9459	21264	0.444836			8e-09	2.75034	0.0951845
														C1	10800	20173	0.535369			8e-10	3.65831	0.0749232
														C2	11069	20990	0.527346			8e-11	3.78317	0.0966264
														C3	10865	20435	0.531686
														D1	13653	19066	0.716091
														D2	13446	18855	0.713126
														D3	13446	18603	0.722787
														E1	20927	15225	1.37452
														E2	21313	14839	1.43628
														E3	21792	14903	1.46226
														F1	28721	10157	2.82771
														F2	26845	10153	2.64405
														F3	29349	10560	2.77926
														G1	32019	8925	3.58756
														G2	32996	8830	3.73681
														G3	33001	9040	3.65055
														H1	32962	8765	3.76064
														H2	32266	8721	3.69981
														H3	32431	8339	3.88908
End Time:	29.04.2016 22:59:56
[truncated: 152 more columns]

## Sheet: pH 7.0
Application: Tecan i-control				Tecan i-control , 1.11.1.0
Device: infinite M1000				Serial number: 806003044
Firmware: V_2.09_04/2011_S3LCE (May 2 2011/09.25.56)				MAI, V_2.09_04/2011_S3LCE (May 2 2011/09.25.56)
Date:	29.04.2016
Time:	23:03:31
System				ISIC-JOHNSSON-7
User				ISIC-Johnsson-7\Group Johnsson
Plate				Greiner 96 Flat Bottom Black Polystyrene Cat. No.: 655079/655086/655077/655076 [GRE96fb_chimney.pdfx]
Plate-ID (Stacker)
Label: Label1
Mode				Fluorescence Top Reading
Emission Wavelength Start				540	nm
Emission Wavelength End				740	nm
Emission Wavelength Step Size				1	nm
Emission Scan Number				201
Excitation Wavelength				520	nm
Bandwidth (Em)				280...850: 10 nm
Bandwidth (Ex) (Range 1)				230...300: 5 nm
Bandwidth (Ex) (Range 2)				301...850: 10 nm
Gain				170	Manual
Number of Flashes				30
Flash Frequency				400	Hz
Integration Time				20	µs
Lag Time				0	µs
Settle Time				0	ms
Z-Position (Manual)				20200	µm
Part of Plate				A1-H3
Start Time:	29.04.2016 23:09:03
	Temperature: 25.2 °C
Wavel.	540	541	542	543	544	545	546	547	548	549	550	551	552	553	554	555	556	557	558	559	560	561	562	563	564	565	566	567	568	569	570	571	572	573	574	575	576	577	578	579	580	581	582	583	584	585	586	587	588
A1	4389	3648	2986	2601	2200	2205	2274	2102	2328	2390	2646	2842	3070	3226	3463	3518	3985	4155	4737	5027	5258	5695	6031	6355	6906	6876	7591	7760	8323	8479	8630	8668	8875	9548	9392	9608	9849	10262	9441	9704	9434	9442	9699	9067	8901	8607	8576	8596	7957
A2	5300	3295	3079	2425	2155	2272	2320	2056	2515	2482	2593	2838	3037	3475	3418	3538	3917	4294	4643	4934	5449	5739	6410	6400	6672	7127	7570	7998	8246	8647	8730	9097	9251	9293	9572	9746	9766	9660	9916	9693	9449	9844	9415	9196	8960	8610	8508	9201	8384
A3	5424	3422	2829	2481	2378	2153	2021	2225	2056	2487	2614	2745	2910	3152	3244	3299	3676	4139	4290	4722	5465	5591	6048	6248	6757	6838	7225	7519	7840	8211	8344	8776	8860	8716	9130	9180	9278	9031	9533	9023	9138	9357	8823	8978	8942	8281	8049	7786	8098
B1	5352	3376	3001	2552	2349	2371	2032	2281	2234	2539	2703	2847	3222	3135	3435	3850	4154	4407	4726	5163	5637	5885	6411	6450	7166	7780	8057	8468	8529	8672	9136	9176	9963	9752	9682	10047	10327	9825	10151	10139	10018	10057	9491	9841	9645	9095	9144	8645	8736
B2	5455	3364	2869	2378	2333	2172	2164	2193	2414	2456	2592	2904	2928	3142	3461	3719	4239	4314	4758	5340	5413	5967	6049	6524	6984	7644	8184	8126	8377	9045	8844	9349	9696	9766	9834	9929	10201	10414	9829	10267	10330	9793	9804	9601	9640	9314	8490	9022	8775
B3	5151	3507	3067	2752	2436	2159	2225	2218	2343	2255	2421	2673	2964	3114	3411	3737	3993	4203	4611	5110	5588	5722	6217	6667	6969	7142	7968	7941	8423	8747	8953	9393	9274	9700	9650	9959	10046	9532	9974	10349	9706	9881	9353	9842	9346	9074	8814	8760	8360
C1	5115	3422	3069	2549	2389	2284	2349	2451	2330	2847	2694	2997	3348	3199	3759	4082	4586	4765	5052	6012	6086	6579	6890	7467	7851	7927	8644	9067	9262	9818	10267	10610	10674	11107	10837	11259	11220	11494	11080	11470	11454	11472	10886	11289	10308	10444	10047	9465	9580
C2	5257	3850	3021	2625	2274	2209	2392	2298	2396	2478	2803	3021	3183	3411	3646	3872	4541	4754	5021	5682	6112	5891	6712	7051	7683	8118	8555	8648	9244	9440	9924	10343	10234	10389	10794	11212	11115	11055	11304	11000	11031	11102	10924	10595	10395	9851	9636	9724	9422
C3	5282	3531	3040	2533	2470	2323	2174	2305	2121	2562	2645	3144	3122	3442	3695	4228	4481	4551	5284	5394	6038	6543	7038	7101	7702	8109	8714	8738	9404	9839	9831	10426	10505	11082	10860	11279	11080	11389	11164	11226	11273	11050	11387	10583	10467	10010	10140	9327	9455
D1	5908	3747	3213	2831	2671	2440	2710	2613	3053	2896	3386	3527	3540	4529	4621	4889	5574	5960	5949	6886	7406	7894	8834	8937	9455	10231	10705	11036	11678	12528	12521	12871	13140	13912	14471	14371	13982	14949	14248	13994	14195	14032	14311	14020	13987	13234	12851	12461	12080
D2	5331	3856	3307	2932	2778	2632	2508	2559	2685	2913	3104	3545	3517	4307	4548	4648	5226	5633	6303	6588	7220	7597	8030	8711	9476	9752	10421	11076	11182	11944	11995	12959	12770	13409	13121	13972	13338	14071	13849	13626	14109	13572	13281	13165	12735	12631	12149	11477	11877
D3	5400	3738	3379	2834	2752	2791	2408	2626	2776	2999	2817	3435	3900	4021	4539	4789	5149	5878	5980	6815	7238	8032	8395	8937	9455	9502	10606	10818	11643	12408	12175	12960	12922	13053	13961	13854	14130	14064	14104	14555	13532	14144	13274	13537	13207	12918	12758	12418	11903
E1	5773	3998	3562	3429	3242	3171	3296	3639	3903	3978	4329	4711	5300	5502	6127	6892	7534	8365	9021	9484	10457	10624	12601	12985	14125	14956	15572	16686	17556	18198	18209	19714	19923	20052	20478	21570	22006	21990	21291	21285	21168	20991	21281	21384	20901	19732	19872	19118	18435
E2	5571	4150	3532	3275	3092	2931	2956	3454	3524	3926	4368	4769	5319	5904	6048	6584	7398	8016	8557	9773	10757	10674	11942	12845	13802	14632	15565	16141	16808	18116	18260	18902	19507	19734	20168	21342	21407	20962	21179	21368	20499	20961	20340	20176	20402	19166	19423	18395	18096
E3	6083	4184	3435	3193	3153	3047	3302	3642	3640	4067	4382	4722	5141	5559	6435	6721	7306	7858	8653	9447	10476	11236	12008	12589	13687	14583	15326	16593	16625	17595	18209	18746	19716	19988	20816	20639	20621	21164	21334	21285	20729	20659	20787	20653	19710	19766	19081	18650	18213
F1	5830	4488	3919	3673	3688	3626	4078	4508	4478	4911	5553	6219	6803	7510	8321	8925	10199	10668	11843	12984	14291	15129	16535	17001	18765	19831	20802	21376	23208	24361	24634	26131	26740	26665	28205	28181	28943	28781	29216	29711	29573	29431	29347	28295	27384	27034	26405	25639	25864
F2	6033	4259	3931	3665	3504	3763	3928	4312	4835	5239	5557	5960	6382	7700	7869	8700	9675	10747	11770	12593	14081	15321	16497	17456	19053	19457	20857	22563	22945	24404	25033	26024	27257	28017	27906	28184	28879	28535	29080	30137	29200	29420	28713	27688	27808	27853	26827	26008	24964
F3	6414	4567	4054	3779	3864	3438	3838	4377	4399	4962	5302	5911	6433	7222	7855	8873	9649	10138	11237	12272	13217	14427	15566	16830	17873	18932	19643	21059	22840	23254	24309	25310	25896	26086	27130	27803	28229	27792	28700	28980	28505	27800	28139	27164	26794	26451	26439	25219	24145
G1	5961	4747	4247	4192	3948	4360	4415	4797	5126	5583	6177	6956	7305	8385	8837	10053	10876	11853	12799	14508	15747	16191	18247	19355	21047	21730	22801	23640	25403	27205	27925	28789	29885	30265	30684	31475	31505	31977	32730	32088	32390	32369	31693	31411	30851	30034	29772	28907	27442
G2	6364	4457	4256	3818	4039	3991	4242	4784	4898	5665	6119	6872	7446	8129	8585	10299	11024	12007	13313	14402	15795	16443	18150	19308	20185	21559	23132	24262	26047	26276	28412	28472	28993	30253	31176	32044	32573	32946	32953	32568	33144	32215	32207	31042	31340	29864	29784	29099	27474
G3	6030	4700	4175	3835	3923	4038	4245	4379	4760	5351	5453	6684	7166	7878	8539	9302	10218	11295	11984	13255	14556	15950	16754	18031	19297	21150	21922	22699	24801	25247	26362	27157	27679	28618	29721	29314	30419	30124	30161	30668	30623	30043	30302	29281	29016	28436	27991	26581	26447
H1	6192	4794	4165	4112	3974	3975	4657	4705	5300	6226	6570	6937	7910	8628	9021	10585	11025	12127	13181	15126	16118	17266	18907	19814	21325	23009	23942	25418	26339	27554	28873	29473	30146	30977	32341	32354	32709	32996	32763	33889	33251	32542	32985	31935	31794	30747	30586	29292	28861
H2	6309	4649	4176	3994	3903	4104	4336	5007	5195	5884	5930	6845	7989	8637	9454	9967	11501	11765	13854	15066	16273	17379	18508	19980	21201	22337	23838	25164	26777	28218	28822	29590	30558	31790	32132	32968	33171	33445	33876	33432	33749	33596	33497	33796	32215	31430	31225	29343	28298
H3	5863	4511	4118	3956	3855	4172	4348	4709	4819	5523	5741	6571	7038	8099	8447	9833	10637	11403	12468	13895	15269	16164	17526	19025	20007	20798	22256	23670	24995	26649	26473	26646	28243	29285	29942	30985	30764	30584	31029	31576	30651	30812	30961	30039	29733	29164	29140	27875	27149
															TMR int.	SiR int.	Ratio (TMR/SIR)			[NADP+] (M)	Mean Ratio (TMR/SIR)	SD
														A1	10262	20996	0.48876			0.0001	0.464595	0.0211894
														A2	9660	21192	0.455832			1e-05	0.472764	0.0156224
														A3	9031	20105	0.449192			1e-06	0.552045	0.0113483
														B1	9825	20761	0.473243			2e-07	0.786031	0.0277198
														B2	10414	21334	0.488141			4e-08	1.46875	0.0362921
														B3	9532	20862	0.456907			8e-09	2.76887	0.0985741
														C1	11494	20950	0.54864			8e-10	3.89572	0.109805
														C2	11055	20367	0.54279			8e-11	4.02586	0.0608764
														C3	11389	20168	0.564706
														D1	14949	18291	0.817287
														D2	14071	18124	0.776374
														D3	14064	18398	0.764431
														E1	21990	14580	1.50823
														E2	20962	14589	1.43684
														E3	21164	14484	1.4612
														F1	28781	10138	2.83892
														F2	28535	10743	2.65615
														F3	27792	9885	2.81153
														G1	31977	8459	3.78023
														G2	32946	8239	3.99879
														G3	30124	7708	3.90815
														H1	32996	8340	3.95635
														H2	33445	8255	4.05148
														H3	30584	7515	4.06973
End Time:	29.04.2016 23:19:57
[truncated: 152 more columns]

## Sheet: pH 7.2
Application: Tecan i-control				Tecan i-control , 1.11.1.0
Device: infinite M1000				Serial number: 806003044
Firmware: V_2.09_04/2011_S3LCE (May 2 2011/09.25.56)				MAI, V_2.09_04/2011_S3LCE (May 2 2011/09.25.56)
Date:	29.04.2016
Time:	23:22:12
System				ISIC-JOHNSSON-7
User				ISIC-Johnsson-7\Group Johnsson
Plate				Greiner 96 Flat Bottom Black Polystyrene Cat. No.: 655079/655086/655077/655076 [GRE96fb_chimney.pdfx]
Plate-ID (Stacker)
Label: Label1
Mode				Fluorescence Top Reading
Emission Wavelength Start				540	nm
Emission Wavelength End				740	nm
Emission Wavelength Step Size				1	nm
Emission Scan Number				201
Excitation Wavelength				520	nm
Bandwidth (Em)				280...850: 10 nm
Bandwidth (Ex) (Range 1)				230...300: 5 nm
Bandwidth (Ex) (Range 2)				301...850: 10 nm
Gain				170	Manual
Number of Flashes				30
Flash Frequency				400	Hz
Integration Time				20	µs
Lag Time				0	µs
Settle Time				0	ms
Z-Position (Manual)				20200	µm
Part of Plate				A1-H3
Start Time:	29.04.2016 23:27:45
	Temperature: 25.2 °C
Wavel.	540	541	542	543	544	545	546	547	548	549	550	551	552	553	554	555	556	557	558	559	560	561	562	563	564	565	566	567	568	569	570	571	572	573	574	575	576	577	578	579	580	581	582	583	584	585	586	587	588
A1	4292	3682	3029	2434	2316	2098	2486	2074	2292	2570	2553	2843	2940	3190	3413	3822	4239	4406	4534	5289	5393	5860	6017	6547	6952	6833	7427	8088	8469	8760	9184	9153	9006	9771	9625	9895	10058	10166	9955	9727	9788	9594	9956	9745	9049	9560	8856	8906	8595
A2	5306	3595	3011	2521	2316	2339	2373	2286	2434	2804	2590	3002	3076	3347	3670	3953	4062	4488	4858	5346	5697	6037	6142	6526	7151	7819	8006	7999	8902	8597	8980	9585	9527	10140	10242	10151	10478	10131	10080	10479	10151	10475	9940	9833	9959	9261	9207	9195	8736
A3	5262	3773	2941	2585	2396	2464	2280	2315	2491	2396	2900	2787	3123	3155	3645	3860	4314	4950	4513	5310	5467	6154	6226	6652	7352	7625	7958	8508	8868	8854	8916	9785	9711	9981	10180	9962	10123	10644	10203	10492	10542	10424	10245	10034	9727	9222	9143	8915	8740
B1	5234	3602	2928	2840	2126	2092	2392	2318	2567	2674	2697	3040	3256	3501	3667	4012	4361	5030	5082	5454	6219	6733	6412	7330	7596	8387	8388	8597	9031	9667	9847	10526	10410	10938	10528	10733	11054	10776	11283	11035	10691	10431	10842	10234	9853	9842	10004	9730	9000
B2	5383	3730	3153	2685	2562	2367	2488	2258	2533	2618	2734	3103	3210	3447	3785	4263	4395	5018	5109	5627	5980	6400	6716	7210	7810	8136	8509	8784	9276	10037	9904	9845	10303	11053	10712	10974	10773	10943	11027	10964	10989	10843	10841	10853	10293	10382	9951	9489	9274
B3	5886	3382	3109	2493	2384	2348	2441	2344	2370	2522	2904	2974	3272	3450	3843	4201	4479	4638	5250	5739	6064	6275	7047	7423	7695	8281	9139	8866	9101	9696	9678	10470	10418	10698	11199	11346	10717	11516	11120	10951	10685	10952	10652	10728	10426	9926	9453	9838	9249
C1	5796	3773	3084	2768	2578	2511	2406	2637	2579	2838	2892	3209	3586	3711	3980	4544	4902	5367	5571	6087	6535	7000	7734	8313	8393	8850	9082	9898	10091	10754	10694	11178	11587	11876	11987	12432	12235	12302	12606	12314	12462	12280	11780	11701	11966	10968	11024	10767	10573
C2	5680	3732	3047	2675	2478	2421	2524	2451	2646	3068	3083	3556	3701	4075	4216	4598	5055	5483	5866	5947	6534	6996	8105	8495	9093	9188	9622	10631	10577	11126	11535	11976	12350	12553	12230	12715	12659	12547	13116	12958	12968	12758	12799	12250	11779	11842	11048	11050	10906
C3	5176	3736	3135	2775	2547	2538	2402	2508	2616	3016	3052	3258	3781	3846	4133	4223	4758	5124	5592	6041	6786	7039	7786	7976	8535	8759	9466	10092	10431	11232	11382	11450	11970	12407	12531	11971	12234	12963	12229	12802	12430	12341	12107	11597	12006	11378	11171	11003	10699
D1	5561	3584	3287	3221	2831	2825	2891	2833	3241	3428	3418	4232	4455	5007	5269	5578	6538	6585	7584	7894	8504	9166	9844	10362	10582	11557	12497	12679	13735	14385	14286	14835	15306	15258	15704	16390	16392	16328	16729	16222	16720	16020	16131	15552	15807	15348	15091	14330	13936
D2	5336	3893	3462	3008	2766	2720	2912	3172	3284	3354	3579	4058	4357	4811	5194	5435	6107	6666	7259	7757	8407	8877	9707	10286	10623	11895	12316	12980	13142	14295	14718	14881	15156	15888	15689	16638	16223	16561	16690	16450	15844	15948	15701	15467	15679	15015	14573	14535	14389
D3	5550	3754	3224	3206	2776	2708	2879	2954	2836	3465	3639	3875	4109	4611	5031	5354	6220	6448	7318	7570	8388	9110	9499	10182	10791	11549	11739	12588	12946	13682	14488	13869	14831	15815	15652	15475	16011	15897	16445	15924	16150	15723	15456	15351	15043	15036	14626	14411	13391
E1	5929	4254	3784	3633	3503	3492	3646	3604	3998	4684	4702	5709	5855	6327	6815	7927	8501	9711	10096	11236	12268	12935	14118	15121	15909	16795	17768	18843	19998	21133	21005	22411	21921	22774	23335	23745	24007	24797	24722	24429	24690	24112	23747	23244	22632	22987	21672	21097	20888
E2	5669	4088	3502	3564	3467	3287	3595	3792	4266	4217	4657	5331	5965	6544	6969	7953	8452	9099	10194	10870	11993	12851	13771	14885	15862	16686	17358	18116	19379	20000	21295	21893	23245	22555	23369	23743	23917	23936	24370	24436	24304	23342	23653	23102	22830	22628	22117	21421	21520
E3	5812	3919	3911	3691	3404	3431	3476	3737	3888	4701	4902	5171	5533	6424	7042	7940	8304	9435	10211	10961	12272	12971	13802	14471	15568	17283	17802	18232	19410	20195	21433	21008	22304	22776	23558	24040	24017	24605	24812	24312	24348	24255	23731	23706	23322	22805	22208	21301	21036
F1	6005	4727	4442	4027	3833	4043	4315	4560	4900	5601	5943	6878	7381	8147	8664	9694	11187	11840	12944	14238	15420	16210	17688	18858	20331	21549	22622	24077	24896	26213	27437	28239	29229	29404	29918	30261	30929	30973	31022	31715	31632	31230	30819	29957	29753	29142	28336	28375	27349
F2	5890	4682	4297	4266	3692	4095	4144	4555	4743	5483	6020	6741	7709	8072	8584	9695	10918	11630	12952	13822	15479	16007	17392	18298	19915	21544	22670	23990	24724	25929	27056	27945	28843	29959	30624	31123	30289	30778	31549	31589	32433	30666	30818	31259	30143	29088	29356	27807	26873
F3	6069	4609	4067	3912	3918	3935	4425	4415	4981	5612	6378	6563	7671	8039	8827	9648	10438	11311	12699	14224	15167	15833	17808	19071	19850	21320	22246	24000	24934	27180	27771	28213	28700	29212	30167	31495	31095	31531	31769	31159	31652	31158	32381	30235	30685	28837	28642	28183	27211
G1	7733	6340	6333	5829	6174	6387	6406	7161	7353	8523	8333	9647	9928	11435	12240	12702	14493	15300	16210	17887	18959	20247	21902	23376	24574	26336	27147	28647	30969	31984	32195	34290	34209	36167	36511	36267	37020	37542	37820	37589	37344	36962	36470	36752	35695	34481	34882	33590	32920
G2	6428	4967	4290	4569	4256	4286	4502	5195	5446	6192	6327	7334	7941	9100	9616	10515	12005	12608	14507	15744	16854	18352	19800	21182	22289	24092	24615	26122	27141	28838	30880	31193	31607	32827	33841	33677	34727	34333	35173	35223	35027	35092	35135	32976	33102	32816	32145	31952	29920
G3	6188	4619	4539	4102	4356	4348	4545	5199	5407	6045	6678	7239	8155	8766	9869	10436	12156	12843	13999	15422	16753	18102	19528	20539	22089	23850	23995	26279	27933	28815	29635	31106	31309	32605	33470	33855	34241	34513	34495	34983	34867	33961	34315	33362	33631	32650	31644	30906	30137
H1	5904	4622	4444	4096	4534	4565	4777	5107	5730	6565	6576	8012	8563	9267	10048	10844	13047	13497	14498	15860	17547	18718	20439	20982	22624	24306	25538	27146	28612	29917	30936	32421	33748	34218	34802	34439	35358	36166	36786	35821	35460	36269	35395	34655	34206	33552	32440	31785	30299
H2	6096	4422	4503	4357	4312	4391	4732	5232	5450	6030	6630	7790	7976	9562	9866	11359	12504	13375	14763	15690	17494	18676	19958	21931	22343	23989	25470	27696	28959	29813	30684	31312	32837	33677	33807	34642	35836	35446	35162	36340	35498	34787	34646	34471	33610	33444	33335	32017	30988
H3	6447	4629	4443	4279	4315	4351	4819	5007	5330	6201	6924	7451	8041	8813	9984	10957	12084	12836	13867	15812	17608	17863	19699	21598	22378	24431	24593	26376	27723	29335	30258	31031	31983	33605	33549	34541	34835	35141	34481	35322	35088	34925	34357	33804	33123	33245	32149	31199	29849
															TMR int.	SiR int.	Ratio (TMR/SIR)			[NADP+] (M)	Mean Ratio (TMR/SIR)	SD
														A1	10166	20639	0.492563			0.0001	0.480877	0.014909
														A2	10131	21830	0.464086			1e-05	0.504235	0.0136231
														A3	10644	21902	0.485983			1e-06	0.618044	0.0156308
														B1	10776	21037	0.51224			2e-07	0.872818	0.0146947
														B2	10943	22401	0.488505			4e-08	1.7356	0.0532104
														B3	11516	22494	0.511959			8e-09	3.08219	0.064235
														C1	12302	20105	0.611888			8e-10	4.04539	0.0271357
														C2	12547	20690	0.606428			8e-11	4.42117	0.062266
														C3	12963	20388	0.635815
														D1	16328	18444	0.885274
														D2	16561	18893	0.876568
														D3	15897	18558	0.856612
														E1	24797	14123	1.75579
														E2	23936	14288	1.67525
														E3	24605	13856	1.77577
														F1	30973	9930	3.11913
														F2	30778	10232	3.00801
														F3	31531	10108	3.11941
														G1	37542	9347	4.01648
														G2	34333	8435	4.0703
														G3	34513	8523	4.0494
														H1	36166	8277	4.36946
														H2	35446	8049	4.40378
														H3	35141	7826	4.49029
End Time:	29.04.2016 23:38:39
[truncated: 152 more columns]

## Sheet: pH 7.5
Application: Tecan i-control				Tecan i-control , 1.11.1.0
Device: infinite M1000				Serial number: 806003044
Firmware: V_2.09_04/2011_S3LCE (May 2 2011/09.25.56)				MAI, V_2.09_04/2011_S3LCE (May 2 2011/09.25.56)
Date:	29.04.2016
Time:	23:40:24
System				ISIC-JOHNSSON-7
User				ISIC-Johnsson-7\Group Johnsson
Plate				Greiner 96 Flat Bottom Black Polystyrene Cat. No.: 655079/655086/655077/655076 [GRE96fb_chimney.pdfx]
Plate-ID (Stacker)
Label: Label1
Mode				Fluorescence Top Reading
Emission Wavelength Start				540	nm
Emission Wavelength End				740	nm
Emission Wavelength Step Size				1	nm
Emission Scan Number				201
Excitation Wavelength				520	nm
Bandwidth (Em)				280...850: 10 nm
Bandwidth (Ex) (Range 1)				230...300: 5 nm
Bandwidth (Ex) (Range 2)				301...850: 10 nm
Gain				170	Manual
Number of Flashes				30
Flash Frequency				400	Hz
Integration Time				20	µs
Lag Time				0	µs
Settle Time				0	ms
Z-Position (Manual)				20200	µm
Part of Plate				A1-H3
Start Time:	29.04.2016 23:45:56
	Temperature: 25.4 °C
Wavel.	540	541	542	543	544	545	546	547	548	549	550	551	552	553	554	555	556	557	558	559	560	561	562	563	564	565	566	567	568	569	570	571	572	573	574	575	576	577	578	579	580	581	582	583	584	585	586	587	588
A1	4041	3684	3257	2717	2469	2321	2420	2431	2497	2744	2580	3119	3239	3724	3931	4135	4492	4846	5105	5426	6150	6248	6702	7212	7427	8286	8470	9080	9378	10074	9752	10267	10571	11316	10734	10717	10752	11086	11179	11286	11030	11329	10833	10306	10695	10337	9560	9699	9763
A2	5262	3493	2889	2701	2354	2305	2373	2251	2434	2435	2787	3151	3334	3584	3629	4035	4542	4749	5097	5559	6009	5748	6770	7365	7298	7981	8286	8541	9337	9733	9767	10448	10019	10242	10471	10633	10970	11221	10511	11250	10769	10945	10752	10525	10357	9995	9736	9615	9251
A3	5190	3606	2998	2565	2388	2269	2188	2248	2462	2536	2765	2862	3024	3485	3428	3602	4124	4432	4644	5233	5857	6050	6299	7106	7259	7606	8096	8662	8776	9277	9378	9691	9635	9956	9749	10834	10224	10735	10505	10450	10327	10360	10437	10052	10029	9429	9534	9075	8570
B1	5236	3442	3061	2714	2580	2322	2491	2651	2604	2840	2852	3299	3284	3683	4059	4417	4867	5008	5708	6193	6509	6776	7330	7770	8148	8817	9127	9034	10001	10626	10737	10838	11395	10975	11587	11907	11253	11751	11324	11627	11941	11939	11273	11010	10798	10512	10230	10104	9719
B2	5200	3605	2952	2642	2458	2276	2226	2612	2638	2470	2993	3191	3309	3731	3795	4065	4652	4953	5369	5595	6166	6456	6851	7703	8155	8128	8491	8797	9872	9698	10164	10381	10545	10722	10715	11309	11110	11464	11224	11175	11440	11165	10895	10904	10821	10139	10096	9871	9292
B3	5014	3492	2809	2849	2358	2423	2165	2512	2387	2555	2878	3050	3060	3193	4015	4058	4619	4465	4945	5487	6119	6425	6867	7180	7859	8126	8553	9037	9102	9543	9884	10040	10017	11133	10785	10758	10875	11127	10560	10742	10851	10899	10925	10467	10232	10141	9712	9687	9239
C1	5351	3702	3236	2801	2702	2670	2689	2581	2872	2894	3225	3528	3749	4037	4363	5162	5387	5854	5804	6567	7498	7527	8294	8765	9321	9979	10057	10581	11055	11848	12046	12751	12433	13076	13273	13219	13154	13576	13671	13615	13361	13714	13064	12834	12748	12092	11659	11521	11339
C2	5415	3471	3336	2795	2426	2670	2652	2654	2622	3013	2988	3556	3719	3783	4425	4500	5218	5690	5977	6473	7041	7473	8178	8471	8989	9465	9653	10643	10512	11270	11589	11707	12418	12583	12798	12866	13013	13209	13293	12963	12986	12543	12441	12717	11811	12089	11508	11098	11407
C3	5530	3572	3068	2831	2558	2489	2637	2573	2692	2969	3080	3439	3739	4084	4386	4733	5161	5659	6101	6324	7369	7809	8390	8573	8987	9773	10141	10383	11447	11080	11974	12128	12682	12878	12956	13187	13170	12950	13643	13114	13082	13030	13118	12771	12278	12814	11995	11264	11286
D1	5352	3830	3565	3256	3062	3043	2992	2984	3642	3643	4088	4551	4635	5191	5801	6141	6824	7373	7848	8805	9566	9902	10571	11040	12434	12984	13632	14534	15144	15040	16543	16791	17340	17654	17623	18004	18057	18567	18659	18131	18107	17737	17737	17574	16900	16313	16407	15563	15487
D2	5469	3553	3288	3000	3044	3050	3026	3092	3344	3387	3686	4479	4634	4944	5187	6100	6449	6924	7470	8545	9012	9453	10215	10701	11458	12556	12860	12747	14382	15004	15294	15817	16246	16729	16681	17144	17812	17858	17448	17506	17228	17479	17018	16072	16665	15902	15876	15307	15028
D3	5336	3810	2989	2820	2837	2723	2672	2798	2935	3294	3554	3925	4211	4454	5137	5212	5798	6386	6908	7659	8181	8585	8996	10223	10614	11007	11805	12768	13525	13539	14030	14585	15014	15097	15682	15606	15183	15562	16149	16101	15351	15666	15284	15393	14588	14738	14227	13158	13299
E1	5857	4185	3875	3623	3614	3622	3921	4144	4395	5088	5271	5860	6508	7048	7923	8772	9817	9926	11516	12357	13607	14589	15165	15849	17083	18576	19927	20500	21472	22497	23834	24349	25520	25349	26378	26960	27225	26834	27121	26669	26860	26975	27059	25970	25818	25136	25422	24180	23356
E2	5824	4210	3846	3645	3407	3563	3680	3923	4286	4559	5278	5912	6425	6823	7411	8511	9147	10113	10887	12044	12689	14171	15076	15546	16823	18108	18701	19909	20912	21806	22996	23707	24383	24920	25032	25859	26049	26285	26710	26248	26263	26684	26195	24871	24720	24625	23654	23193	22656
E3	5567	4301	3873	3734	3556	3464	3566	4021	4129	5086	5342	5900	6230	7061	7225	7931	9269	9722	10746	11703	13277	13553	14536	15409	16470	18610	19321	19929	21133	22079	22833	23041	24458	24618	25894	25626	26077	25677	26330	26106	25994	25974	25285	25508	24309	23567	23716	22624	22347
F1	6380	4526	4164	4207	4037	4275	4525	4883	5236	5682	6685	7186	7822	8840	9465	10793	11630	12781	13964	15441	16530	17583	18682	19906	21802	23589	24236	25555	26764	27256	29516	30274	30692	31598	32337	32871	33378	33770	33848	33558	33884	33783	32551	32333	32225	30904	31220	29549	28657
F2	6166	4407	4420	4140	4397	4266	4452	4762	5338	5572	6162	7144	7637	8611	9482	10326	11400	12339	13745	14733	16498	17288	18671	20373	21806	22717	23292	25453	26876	27836	29284	30110	31347	31442	32079	32558	32977	33397	33498	33594	33082	33739	32701	32733	31427	31242	30306	29257	28464
F3	6480	4593	4312	4018	4064	4102	4431	4524	4794	5635	6142	6753	7616	8117	8970	9754	10655	11499	12674	13624	15483	16618	18219	19229	20525	22132	23067	24130	25519	26209	27526	27991	28735	30145	31589	31895	32207	31752	31639	31856	31444	31646	31009	30789	30360	30124	28700	28336	27492
G1	5968	4859	4415	4263	4239	4588	4522	5505	5536	6073	6985	7427	8168	9099	9790	11248	12144	13460	14317	15826	17509	18280	20044	21767	22904	23953	25231	26914	29025	29123	31189	31971	32968	33288	33718	34456	34695	35621	35744	35851	35585	35139	34177	34814	34073	32659	32392	31574	30931
G2	6705	4894	4468	4427	4553	4146	4629	5029	5511	6096	6496	7501	8346	9241	10174	10968	12583	13101	14441	16357	17397	18403	20455	20830	22985	24496	25582	27069	28847	29544	30596	32093	32897	33409	34109	34986	35124	35341	35703	35474	35256	35367	35595	34930	34149	32869	33008	31878	31390
G3	6002	4633	4307	4025	4173	4339	4364	4618	5072	6065	6197	7318	7951	8802	9382	10418	11309	12698	13856	15286	16236	17845	18617	20001	21029	23010	23931	25598	27099	27294	29154	30064	30207	32344	32418	32779	34111	33718	33975	33634	33097	33150	33747	32983	31968	32286	30973	30625	28496
H1	6153	4849	4725	4295	4512	4678	5108	5570	5957	6483	7418	7985	8770	9699	10612	11441	13108	13703	15033	16468	18087	19290	20364	21983	23033	25564	27013	27433	29053	31097	32271	33320	33575	35063	35307	35991	36270	37473	36158	36406	37915	36281	36274	35453	34057	34621	34374	32646	30980
H2	6859	4937	4441	4399	4322	4940	4940	5455	5501	6511	6794	7862	8691	9702	10316	11311	12736	13362	15046	15914	17522	18566	20271	21695	23282	24807	26435	27777	28902	30077	31588	32580	33307	34352	34988	35462	36147	35570	36636	36235	36581	36269	35426	35173	34961	33728	32918	32028	31263
H3	6057	4826	4248	4418	4138	4515	4785	5166	5109	6016	6641	7572	8262	9105	9488	10918	12281	13031	14421	15924	16688	17934	19266	20619	22305	24053	24904	26596	27620	29377	30045	31498	32051	33045	33336	34120	34778	34748	34633	35156	34341	35349	34008	33746	33824	32123	32000	31248	29694
															TMR int.	SiR int.	Ratio (TMR/SIR)			[NADP+] (M)	Mean Ratio (TMR/SIR)	SD
														A1	11086	21266	0.521302			0.0001	0.524139	0.0126968
														A2	11221	21869	0.513101			1e-05	0.528513	0.0141904
														A3	10735	19953	0.538014			1e-06	0.655869	0.0054698
														B1	11751	21950	0.535353			2e-07	0.979195	0.131403
														B2	11464	21309	0.537989			4e-08	1.98901	0.0601627
														B3	11127	21724	0.512198			8e-09	3.56163	0.0280636
														C1	13576	20529	0.661308			8e-10	4.33801	0.059439
														C2	13209	20310	0.650369			8e-11	4.61023	0.275328
														C3	12950	19743	0.655929
														D1	18567	17729	1.04727
														D2	17858	16806	1.0626
														D3	15562	18801	0.827722
														E1	26834	13037	2.0583
														E2	26285	13419	1.95879
														E3	25677	13168	1.94995
														F1	33770	9539	3.5402
														F2	33397	9294	3.59339
														F3	31752	8941	3.55128
														G1	35621	8086	4.40527
														G2	35341	8188	4.31619
														G3	33718	7855	4.29255
														H1	37473	7660	4.89204
														H2	35570	7738	4.5968
														H3	34748	8003	4.34187
End Time:	29.04.2016 23:56:51
[truncated: 152 more columns]

## Sheet: pH 8.0
Application: Tecan i-control				Tecan i-control , 1.11.1.0
Device: infinite M1000				Serial number: 806003044
Firmware: V_2.09_04/2011_S3LCE (May 2 2011/09.25.56)				MAI, V_2.09_04/2011_S3LCE (May 2 2011/09.25.56)
Date:	29.04.2016
Time:	22:12:26
System				ISIC-JOHNSSON-7
User				ISIC-Johnsson-7\Group Johnsson
Plate				Greiner 96 Flat Bottom Black Polystyrene Cat. No.: 655079/655086/655077/655076 [GRE96fb_chimney.pdfx]
Plate-ID (Stacker)
Label: Label1
Mode				Fluorescence Top Reading
Emission Wavelength Start				540	nm
Emission Wavelength End				740	nm
Emission Wavelength Step Size				1	nm
Emission Scan Number				201
Excitation Wavelength				520	nm
Bandwidth (Em)				280...850: 10 nm
Bandwidth (Ex) (Range 1)				230...300: 5 nm
Bandwidth (Ex) (Range 2)				301...850: 10 nm
Gain				170	Manual
Number of Flashes				30
Flash Frequency				400	Hz
Integration Time				20	µs
Lag Time				0	µs
Settle Time				0	ms
Z-Position (Manual)				20200	µm
Part of Plate				A1-H3
Start Time:	29.04.2016 22:17:58
	Temperature: 25.2 °C
Wavel.	540	541	542	543	544	545	546	547	548	549	550	551	552	553	554	555	556	557	558	559	560	561	562	563	564	565	566	567	568	569	570	571	572	573	574	575	576	577	578	579	580	581	582	583	584	585	586	587	588
A1	4647	3830	3170	2817	2704	2448	2885	2522	2711	2970	3013	3351	3575	3993	3981	4409	4983	5424	5985	6263	6755	7508	7546	7892	8826	9473	9699	10298	10347	10662	11342	12018	11725	12355	12467	12648	13314	12861	12915	13025	12256	12407	12504	12323	11976	11615	11442	11365	10595
A2	5562	3577	3094	2554	2605	2579	2278	2550	2623	2908	2973	3246	3755	4090	4186	4497	4996	5277	5778	6128	6998	7409	7855	8375	8909	9195	9810	10389	10591	10817	11125	11633	11789	12147	12314	12129	12542	12974	12707	12567	12372	12847	12636	12114	12001	11885	11499	11311	11190
A3	5420	3751	3290	2737	2536	2570	2433	2553	2813	2766	3071	3079	3533	3882	4041	4772	5027	5149	5574	5956	6588	7184	7370	8104	8292	9124	9432	9815	10343	10911	11273	11155	12201	12279	11909	12418	12636	12373	12945	13073	12435	12232	11835	12204	11611	11510	11079	11091	10251
B1	5508	3869	3269	2850	2596	2846	2529	2739	2799	3000	3097	3368	3803	4161	4720	4705	5392	5941	6275	6563	7430	7760	8696	8780	9530	10478	10783	11481	11458	11854	12265	12715	13367	13373	13581	14000	13630	14325	13844	13549	13932	14189	13038	13314	12704	12914	12508	12383	11585
B2	5439	3743	3202	3051	2668	2663	2731	2583	2869	3085	3439	3471	3929	4355	4282	4854	5629	5858	5901	7068	7334	7826	8294	8983	9676	10172	10157	10867	11304	12375	12210	12218	12455	13242	13209	13958	13517	13677	13869	13445	13338	13488	12968	13135	12990	12490	12278	11843	11575
B3	5099	3792	3124	2784	2681	2569	2593	2755	2775	2755	3066	3423	3576	4180	4535	4790	5396	5587	6135	6400	6970	7777	8078	8886	8940	9300	10209	10619	11258	11428	12126	12319	12341	12321	12836	13603	13482	13687	13476	13393	12863	13549	13078	13097	12399	11895	12353	11667	11338
C1	5187	3896	3357	3165	2884	2819	2992	2809	3429	3729	3777	4270	4504	4976	5500	5619	6553	6839	7366	7953	8898	9232	10044	10680	10799	11855	12728	13590	14081	14245	14853	15182	15995	16007	16384	17180	16246	17099	16522	17482	17047	16494	16539	16334	15658	15659	15479	15075	14305
C2	5419	3778	3467	2908	2878	3047	2906	3020	3103	3361	3526	3875	4575	4762	5281	5335	6023	6605	7126	7793	8314	8810	9509	10121	10559	11637	11970	12684	13682	13878	14104	14656	14993	15104	16186	16258	16908	16444	16577	16192	16135	16257	15938	15968	15786	14880	14929	14114	14076
C3	5708	3837	3227	3144	2819	2788	2847	3035	3272	3561	3730	4152	4335	4994	5253	5443	6416	6885	7421	7791	8495	9459	10266	10818	11278	11641	12591	12970	13671	14167	14534	15310	15547	15760	16298	16682	17212	16824	16761	16665	16920	16311	15781	16710	15878	15222	14499	14656	14491
D1	5995	4193	3650	3787	3396	3227	3658	3718	4036	4240	4825	5338	5680	6192	7048	7881	8260	9060	10127	10840	11214	12310	13063	14190	15467	15835	17194	18015	18203	19410	20249	21071	21239	22549	22625	22981	23352	23139	22746	23372	23498	23079	22671	22077	22144	21890	20909	20872	19659
D2	5682	4153	3545	3468	3280	3348	3309	3520	3877	3983	4587	4949	5693	6066	6826	7253	8175	8577	9092	10341	11336	11692	13103	13685	14732	15621	16504	17269	17835	19008	19346	20411	20513	21621	21705	22441	22616	23010	23078	22798	23045	21944	22448	21529	21474	20983	20077	20115	19204
D3	5388	4271	3577	3351	3192	3058	3629	3670	3935	4237	4484	5114	5481	6454	6783	7585	7722	8567	9472	10560	11273	12083	13022	13704	14472	15478	17042	17295	18091	18905	19753	19866	20812	21265	22259	22509	22673	23087	22565	23044	22830	23078	22632	21650	21642	21271	20554	20257	19600
E1	6500	4646	4262	4081	4118	4005	4520	4670	4948	5546	5990	7017	7642	8323	8791	9999	10840	12128	13068	14127	15535	16289	17999	19557	20375	21941	22803	24219	25980	27449	27703	28717	30169	30929	30411	31775	32009	32496	31576	32557	31701	31433	31176	30899	30052	30049	29177	28437	27833
E2	6057	4803	4302	3714	4130	3924	4360	4622	4943	5370	5855	6398	7113	8278	8692	9535	10465	11594	12338	13517	15311	16305	17373	18082	20112	21425	22389	23197	25524	25999	27050	28468	28684	29758	30262	30781	31611	31144	31645	31521	31713	31581	31509	30707	29553	29383	28658	27366	27221
E3	6200	4669	4167	4171	4042	4251	4272	4605	4799	5602	6135	6971	7226	8298	8670	9801	10843	11865	12844	14113	15427	16141	17835	18865	20256	21667	23018	24123	25102	26614	27834	28205	28979	30159	30857	31058	31535	31609	31798	32731	32294	31474	31218	30786	30432	30459	29212	27525	27710
F1	6405	5036	4671	4445	4073	4722	4879	5180	5907	5809	6624	7667	8173	9748	10070	11017	12043	13365	14610	15708	17959	18449	20386	21746	22480	24670	26228	27124	28224	30051	31027	31331	32857	33588	34850	35789	35667	36490	36195	36655	36586	35940	35770	35912	33804	34422	33043	31419	30443
F2	6260	4880	4351	4470	4308	4415	5096	5239	5923	6458	6803	7745	8554	9462	10321	11293	12664	13648	14794	16269	17557	18649	20158	21583	23463	24627	26686	27096	29354	30566	30987	32197	34156	34737	35386	35526	36544	36326	37099	36648	35941	36401	36876	35604	34540	34178	33716	32861	31547
F3	6873	4830	4352	4261	4230	4116	4662	5245	5617	5974	6889	7493	8121	8974	9792	11043	11863	12884	14581	15213	17342	18644	19087	21030	22717	24061	25531	26451	28031	29817	30438	31833	32232	33696	33643	34736	35585	36257	35645	36087	35426	35364	34756	34015	33949	33488	32214	32103	31175
G1	6292	4981	4456	4466	4464	4430	4978	5421	5828	6326	7370	8168	8662	9578	10827	11725	12678	13619	15128	16825	18618	19522	20361	22023	23998	24922	27120	28034	29117	30953	31542	32884	33614	34699	36067	36073	37076	37268	37789	36209	37500	36769	36230	36158	36321	34239	33114	32765	32238
G2	6288	5120	4426	4520	4371	4568	5116	5559	6103	6283	6901	7820	8586	9579	10355	11572	13329	13834	15271	16477	17857	19451	21196	22501	23732	25744	26504	28491	29970	30993	32323	33092	34125	35857	36008	36886	37691	37419	38002	37002	37283	37353	37284	36752	35467	35099	35072	33440	33459
G3	6392	4599	4570	4321	4443	4454	4928	5567	5688	6115	6681	7721	8216	9537	9850	11245	12498	13345	15152	16054	17582	18861	20728	21100	22956	24599	25567	27397	28726	29967	31487	32209	33087	34347	35191	35549	36097	36011	35997	37096	36080	36712	35478	34839	34198	34040	33301	32466	31892
H1	6051	5062	4745	4388	4616	4749	5163	5601	5927	6609	7372	8029	8373	9981	10828	11793	12798	14109	15430	17145	18192	19867	21455	22646	24208	25419	25960	28189	29658	32084	32770	33698	34749	35573	35833	36529	35705	37347	37893	37419	37716	36599	37362	36748	35683	33878	34035	33070	31562
H2	6601	5003	4644	4637	4987	4999	5130	5459	6085	6592	7472	8174	8992	10162	11118	12214	13645	14617	15780	17171	19202	20955	22016	23599	25143	26816	28153	29663	30924	32825	33800	34742	35909	36611	37229	38813	39043	39022	38935	40075	38583	39014	37999	37817	37380	36817	35701	34069	33632
H3	6241	4818	4848	4619	4790	4734	4844	5852	6190	6525	7426	8492	8932	10043	11184	12573	13386	14186	15697	17338	19006	20479	22076	23419	25094	26847	27744	29454	31660	32304	32901	34865	35455	36613	37100	38534	38196	38004	38783	38900	39116	38430	37895	37645	36919	36378	36131	34678	33784
															TMR int.	SiR int.	Ratio (TMR/SIR)			[NADP+] (M)	Mean Ratio (TMR/SIR)	SD
														A1	12861	21055	0.610829			0.0001	0.592077	0.0163528
														A2	12974	22339	0.580778			1e-05	0.634315	0.012949
														A3	12373	21164	0.584625			1e-06	0.837723	0.0105246
														B1	14325	22210	0.64498			2e-07	1.41058	0.0303806
														B2	13677	22063	0.619907			4e-08	2.72216	0.0658447
														B3	13687	21451	0.638059			8e-09	4.10791	0.00957069
														C1	17099	20472	0.835238			8e-10	4.88215	0.159991
														C2	16444	19844	0.828664			8e-11	5.03059	0.135235
														C3	16824	19810	0.849268
														D1	23139	16081	1.4389
														D2	23010	16269	1.41435
														D3	23087	16748	1.37849
														E1	32496	11822	2.74877
														E2	31144	11765	2.64717
														E3	31609	11409	2.77053
														F1	36490	8886	4.10646
														F2	36326	8821	4.11813
														F3	36257	8845	4.09915
														G1	37268	7369	5.0574
														G2	37419	7723	4.84514
														G3	36011	7591	4.74391
														H1	37347	7201	5.18636
														H2	39022	7864	4.96211
														H3	38004	7688	4.94329
End Time:	29.04.2016 22:28:52
[truncated: 152 more columns]
