# Supplementary material for: Semisynthetic biosensors for mapping cellular concentrations of nicotinamide adenine dinucleotides
Source: eLife. 2018 May 29;7:e32638. doi: 10.7554/eLife.32638 (PMC5990361; doi:10.7554/eLife.32638)
Supplement: Figure 2—source data 3. [file elife-32638-fig2-data3.xlsx]

## Sheet: Figure_2c
Titration of NADP-Snifit with different NADPH/NADP+ ratios
NADPH/NADP+	Ratio (TMR/SiR)	SD
55	2.98031	0.0806621
25.3612	2.30974	0.0149814
20.2462	2.04377	0.0389347
16.7907	1.85846	0.0255718
12.4189	1.61722	0.0155587
10.9486	1.45621	0.107408
6.71102	1.28386	0.0225081
3.49673	1.05109	0.0534269
0	0.685136	0.0795299

## Sheet: NADP-Snifit_NADPH_NADP
Titration of NADP-Snifit at different NADPH/NADP+ ratios
Wavel.	577	667	Ratio (TMR/SiR)			NADPH/NADP+	Mean Ratio (TMR/SIR)	SD
A1	36365	15691	2.31757			55	2.98031	0.0806621
A2	36527	15750	2.31917			25.3612	2.30974	0.0149814
A3	36308	15838	2.29246			20.2462	2.04377	0.0389347
B1	34829	17343	2.00825			16.7907	1.85846	0.0255718
B2	35239	16898	2.08539			12.4189	1.61722	0.0155587
B3	34836	17096	2.03767			10.9486	1.45621	0.107408
C1	33062	18076	1.82906			6.71102	1.28386	0.0225081
C2	33042	17618	1.87547			3.49673	1.05109	0.0534269
C3	33206	17749	1.87087			0	0.685136	0.0795299
D1	30958	19343	1.60048
D2	31044	19031	1.63123
D3	30774	18997	1.61994
E1	27846	20662	1.34769
E2	29244	20051	1.45848
E3	29926	19153	1.56247
F1	26502	21069	1.25787
F2	26487	20423	1.29692
F3	26409	20365	1.29678
G1	24264	22634	1.07202
G2	22931	23154	0.990369
G3	24329	22302	1.09089
H1	17869	26488	0.674607
H2	16441	26891	0.611394
H3	19349	25148	0.769405
NADPH purified by gel filtration (NADPH/NADP+ = 55)
C1	33027	11393	2.89889
C2	33024	11075	2.98185
C3	32998	10783	3.06019
