# Supplementary material for: Semisynthetic biosensors for mapping cellular concentrations of nicotinamide adenine dinucleotides
Source: eLife. 2018 May 29;7:e32638. doi: 10.7554/eLife.32638 (PMC5990361; doi:10.7554/eLife.32638)
Supplement: Figure 2—source data 4. [file elife-32638-fig2-data4.xlsx]

## Sheet: Figure_1d
Titration of NAD-Snifit with NAD+ or NADP+
[NAD+] (M)	Ratio (TMR/SiR)	SD		[NADP+] (M)	Ratio (TMR/SiR)	SD
0.02	0.609735	0.0196046		0.02	2.96049	0.0934116
0.002	0.730594	0.00886425		0.002	3.75354	0.0830882
0.0004	1.12864	0.0170179		0.0004	4.16013	0.0859103
8e-05	2.21001	0.0744293		8e-05	4.21017	0.109294
1.6e-05	3.41574	0.0643257		1.6e-05	4.3016	0.028206
3.2e-06	4.25098	0.152737		3.2e-06	4.15915	0.0293005
3.2e-07	4.38973	0.191222		3.2e-07	4.23816	0.060984
3.2e-08	4.65332	0.13816		3.2e-08	4.30116	0.0553315

## Sheet: NAD-Snifit_NAD+
Wavel. (nm)	540	541	542	543	544	545	546	547	548	549	550	551	552	553	554	555	556	557	558	559	560	561	562	563	564	565	566	567	568	569	570	571	572	573	574	575	576	577	578	579	580	581	582	583	584	585	586	587	588
A10	6056	4692	3493	3169	2459	2356	2315	2222	2479	2161	2549	2722	2804	3260	3574	3889	4385	4829	4923	5540	6335	6786	7657	8155	8738	9092	9308	10190	10526	10922	11256	12021	12471	12564	12911	12846	13993	13251	14438	13400	14442	13612	13881	13791	13370	12755	12642	12346	11970
A11	6420	4815	3466	2815	2598	2450	2054	2193	2123	2412	2443	2587	2950	3227	3579	3975	4369	4676	5191	5802	6108	7166	7179	7870	8607	9125	10137	10074	10642	11437	11164	12456	12439	12718	13261	14285	13827	14224	13397	13632	13820	13943	13262	13983	13448	13075	12847	12260	11830
A12	6391	4688	3468	2992	2481	2436	2127	1980	2346	2340	2388	2683	3011	3256	3333	3945	4060	4526	4948	5548	6074	6441	7060	7635	8142	8884	9617	10320	10447	10967	10617	11356	11897	12630	12236	12791	13321	12654	13666	13443	13703	13306	13319	12569	12886	12190	12851	11797	11390
B10	6165	4609	3268	2818	2558	2472	2221	2345	2254	2712	2897	2858	3241	3436	3860	4479	4968	5041	5894	6672	7037	8175	8843	9061	10151	10319	11048	11923	12432	13070	13295	13940	14275	15154	15028	16284	16071	15804	16110	15956	16294	15533	15883	15548	15925	14656	14795	14483	14008
B11	6189	4763	3190	2717	2589	2357	2252	2398	2097	2394	2719	3030	3195	3697	3580	4274	4597	5161	5791	6248	7220	7606	7834	8889	9757	10011	11285	12474	12103	12899	13250	13668	14155	14937	15286	15984	15418	15904	16508	15960	15545	15550	16098	15037	15114	14966	14119	14140	13802
B12	6557	4322	3712	2710	2605	2118	2263	2211	2367	2342	2584	2833	3172	3475	4057	3986	4888	5254	5990	6719	7081	7790	8745	8754	9701	11097	10954	11908	12642	12833	12855	13805	14434	14232	15029	15404	16044	15094	15860	16354	15952	16764	16375	15019	15036	15196	14786	13916	13322
C10	6198	4827	3363	3324	2997	2488	2696	2508	2644	2979	3144	3457	3725	4504	4788	5747	5942	6844	7602	8121	9174	9983	10557	12002	12574	13632	14264	15492	15375	16460	16895	18190	19158	19998	19317	20367	21936	21034	21167	20624	21322	21046	20805	20683	19824	19786	19481	18516	18197
C11	6433	4829	3886	3096	2883	2565	2230	2435	2599	2971	3172	3099	3799	4336	4918	5502	6054	6589	7373	8297	8975	9691	10738	11598	12474	13378	14579	14956	16044	17023	17721	18661	19268	19047	19488	20080	21066	20583	21167	21044	20891	21487	20551	20168	19968	20249	19085	18490	19191
C12	5908	4450	3417	3120	2622	2588	2566	2571	2536	3051	3251	3287	3825	4536	5276	5590	6164	6606	7418	8285	9203	10054	10789	12044	12720	13611	14292	15525	16245	16751	18636	18304	19262	19667	19962	20846	21245	21068	21017	21479	21544	21281	21327	20813	21040	20657	20405	18878	18859
D10	6544	4857	3899	3396	3024	2827	2917	3223	3221	3432	4036	4353	4971	5836	6403	7241	8193	8887	9637	11373	12382	13757	14388	16160	16551	18767	18917	20833	22072	23795	24430	25094	26070	26763	27274	28368	29079	29066	28528	29203	28890	28430	28894	29166	28102	26943	26266	26110	25656
D11	6765	4653	3818	3258	3067	2882	2920	3098	3129	3565	3784	4496	5054	5726	6354	7454	8075	9000	10146	11363	12407	13191	14340	16201	17681	18430	19806	21612	21836	24550	24153	25539	26650	27255	28122	29037	29399	29752	29445	29808	29543	29643	29644	29328	28421	28155	27166	27007	25877
D12	6430	5312	4024	3357	2966	2874	2928	3142	3268	3715	4198	4379	5227	5826	6868	7368	8490	9014	10613	11367	13275	13361	14443	16256	17451	18561	20552	21438	23148	23283	24694	25889	26799	27710	27950	29417	29373	29490	30179	29854	29743	29198	29088	29122	28261	28378	28493	26339	25950
E10	6412	4668	4084	3692	3074	2943	3096	3538	3725	4270	4950	5551	5918	6989	7503	8571	9816	11127	12211	13713	14866	16217	18389	19487	21712	23033	24030	26147	26775	29029	31217	30945	32890	33670	34355	36031	35222	35906	37399	36614	35685	35448	35618	34886	34984	34280	34074	32419	31517
E11	6654	5196	3714	3380	3247	3280	3295	3433	3697	4150	4865	5526	6046	6817	7921	8627	9550	10622	11924	12987	14869	16831	17662	19053	21333	22787	24237	26277	28072	28643	29787	31118	32154	33126	33644	35004	35907	35144	36174	36910	35542	36253	35779	34922	34106	34544	34626	32621	31309
E12	6643	5264	4210	3755	3352	3269	3388	3599	3849	4256	4889	5504	6014	7021	7965	8932	9941	11166	12677	13702	14687	16264	17974	19952	21037	23365	24589	26239	27322	28416	30458	30993	32346	33593	34546	35046	36118	35830	36469	36703	37507	36834	36367	35532	35805	33521	34509	33164	32156
F10	6391	5123	4303	3691	3414	3351	3619	3686	4046	4315	5064	5403	6126	7403	7711	9438	10639	11309	12931	13706	15558	17482	18994	20520	21765	25330	26447	27934	28662	30062	31786	32842	34796	35398	36399	37484	38218	38677	39170	38159	37941	38377	37844	37381	36757	36186	35286	34878	34168
F11	6598	5195	3898	3403	3329	3170	3335	3884	4163	4232	5120	5373	6459	7382	8536	9271	10236	11477	13089	14420	15361	17333	18559	20825	22193	24177	25921	27745	28691	30468	32428	33373	34369	35662	36696	37000	37936	37345	38175	39045	38200	38200	37828	37658	36690	36759	35837	34271	33575
F12	7056	5072	4215	3618	3558	3488	3467	3761	3847	4684	5370	5582	6319	7382	7798	9226	10283	11225	13009	14302	15541	17496	18935	21047	22105	24220	25847	27990	29223	29945	32103	33273	34307	35731	36379	37306	38008	37486	38409	38637	39299	38439	38113	37765	37338	36154	35927	34428	33131
G10	6742	5177	4055	3616	3615	3585	3371	3771	4168	4638	5213	5592	6425	7036	8567	9222	10432	11673	13095	14922	16388	17641	19269	21325	22980	24152	25110	28245	30035	31095	31999	34328	35674	35672	36911	38288	38440	38836	39342	39662	39595	38729	39149	38404	38155	37984	36008	34975	35091
G11	6380	5257	4264	3356	3377	3388	3613	4014	3927	4478	5204	5589	7130	7499	8557	9138	10613	11313	13528	14109	16500	17814	19907	21194	23470	24360	26095	27972	29277	31417	32016	33999	34706	36151	36412	38578	38493	38357	39294	39438	39114	39992	38906	38357	38704	38433	37024	35285	34249
G12	6805	5303	4185	3481	3553	3585	3583	3672	4089	4660	4970	5609	6599	7207	8221	9279	10199	11635	13532	14424	15929	17273	18209	20564	23184	24336	25984	27981	28928	30896	32929	34481	35004	35257	35975	36960	38156	39349	38709	38411	38568	38874	38936	38368	38226	36694	35575	35156	34011
H10	6396	5120	4036	3529	3458	3609	3502	3489	4048	4503	5371	5658	6431	7658	8392	9560	10489	12273	13214	14488	16066	17797	19803	21895	23089	24597	26041	28109	28994	30773	33344	34284	35265	35751	36882	38564	38186	39634	39403	38530	38985	39333	39879	39248	38071	38300	36400	35615	34353
H11	6848	4988	4180	3578	3446	3580	3616	3471	3992	4444	5430	5936	6560	7659	8477	9523	10809	12528	14013	14544	15695	18556	19234	20488	23716	24784	26509	28009	30332	30621	33100	34916	35263	36543	37293	38729	39432	39925	39406	40290	39720	39217	38414	39770	38162	37171	35971	35125	34920
H12	6770	5118	4174	3817	3734	3252	3274	3735	3939	4400	5362	5975	6748	7515	8462	9322	10783	11690	13441	14815	15702	18080	18902	20556	22158	23921	26026	27778	28993	30131	32657	34207	34890	36368	36536	37820	38910	38917	38686	39154	39792	39059	38207	37640	37712	37254	35926	35021	33981
															TMR int.	SiR int.	Ratio (TMR/SIR)			[NAD+] (M)	Mean Ratio (TMR/SIR)	SD
														A10	13251	22053	0.600871			0.02	0.609735	0.0196046
														A11	14224	22499	0.632206			0.002	0.730594	0.00886425
														A12	12654	21227	0.596128			0.0004	1.12864	0.0170179
														B10	15804	21467	0.7362			8e-05	2.21001	0.0744293
														B11	15904	21632	0.735207			1.6e-05	3.41574	0.0643257
														B12	15094	20953	0.720374			3.2e-06	4.25098	0.152737
														C10	21034	18886	1.11374			3.2e-07	4.38973	0.191222
														C11	20583	18296	1.125			3.2e-08	4.65332	0.13816
														C12	21068	18365	1.14718
														D10	29066	13596	2.13783
														D11	29752	13012	2.2865
														D12	29490	13370	2.20568
														E10	35906	10584	3.39248
														E11	35144	10440	3.36628
														E12	35830	10271	3.48846
														F10	38677	8738	4.4263
														F11	37345	9006	4.14668
														F12	37486	8968	4.17997
														G10	38836	8779	4.42374
														G11	38357	9168	4.18379
														G12	39349	8626	4.56167
														H10	39634	8430	4.70154
														H11	39925	8386	4.76091
														H12	38917	8653	4.49752
[truncated: 152 more columns]

## Sheet: NAD-Snifit_NADP+
Wavel. (nm)	540	541	542	543	544	545	546	547	548	549	550	551	552	553	554	555	556	557	558	559	560	561	562	563	564	565	566	567	568	569	570	571	572	573	574	575	576	577	578	579	580	581	582	583	584	585	586	587	588
A4	2943	3003	3128	3717	3520	4123	4469	4919	5486	6401	6350	8290	8663	9774	10170	11416	12446	14332	14926	16224	18103	19613	20890	22657	24561	25297	26977	28066	29802	31084	32146	33365	34058	34785	36099	37183	36955	37608	37555	38090	37713	37348	36830	37154	35495	33987	34568	33481	31802
A5	2544	2684	2864	3144	3296	3911	4391	4730	5391	5958	6807	7416	8273	9349	9875	10818	12191	13518	15278	16520	17493	18269	20065	22284	23645	24374	26763	27077	28500	29425	31834	31598	34059	33661	34946	35588	35186	35595	36007	35965	36791	36161	35600	35573	34761	34565	33354	31258	31459
A6	2741	2990	2969	3418	3768	4327	4416	5321	5682	6173	7290	8012	8825	9206	10705	11839	12672	14578	15452	16820	18551	19692	22480	23342	25115	26138	27704	28669	30090	31638	33532	33364	34962	35357	37035	37268	37516	38222	39065	37859	38712	37430	37771	37618	36173	36357	34446	33839	32220
B4	3377	3567	4126	4325	4686	5599	5697	6201	7170	8043	9341	10212	11479	12460	14142	15396	17444	18644	20570	23157	24149	25974	29424	30332	32716	34937	37039	38395	41242	42559	43933	46029	47096	47411	49996	50953	50264	50149	50789	52216	51525	50598	50754	49560	49085	47451	46789	46217	43747
B5	3346	3418	3912	3873	4114	4916	5447	6045	6957	7627	8392	9608	10332	11732	12548	13945	16226	16991	18502	20801	22260	22987	26395	27675	30228	31986	33299	35618	36717	39371	41466	40354	44116	44872	44716	45546	46660	46290	46710	46919	47076	45768	46613	45547	43803	44026	42934	41826	39803
B6	3394	3417	3643	4178	4403	5250	5978	6251	7055	8062	8968	10052	11531	12138	14061	14507	16556	18540	19557	21676	23308	25350	27631	30334	31532	33496	35633	36484	40049	41910	42194	43496	44577	46466	46444	49470	48003	48767	50241	49909	49347	50444	48661	48106	46779	45900	45400	43320	41598
C4	3775	3714	3726	4108	4782	5478	6186	6627	7620	8685	8757	10298	11895	12965	13723	15682	17290	19752	21091	22461	24042	26207	29188	30782	31967	34145	38007	38997	40665	42607	44677	44504	47560	47738	49066	50996	50482	50833	51878	50664	51621	50517	50590	48629	48753	47906	46264	44381	44751
C5	3385	3482	3730	4373	4261	4905	5669	5774	6960	7885	8490	9467	10534	11459	12712	14190	15812	17042	18535	21359	22506	24036	25748	28555	30698	31527	33813	34730	36488	39247	40695	41337	42636	44758	44601	45957	45760	47501	47204	46258	47252	46838	45706	44791	44013	44116	43010	41895	40680
C6	3358	3558	3896	4308	4568	5111	5388	6625	7122	8239	8987	10159	11374	12227	14135	15516	16818	18455	19658	21916	24060	25920	27935	29426	31604	33962	34890	37850	40281	41176	41997	44296	44928	47269	47114	48620	48332	49485	49510	49873	49374	49005	49453	47996	47144	45612	45157	43877	42626
D4	3443	3226	3893	4252	4719	5291	6067	6761	7233	8822	9041	10421	11895	12700	13866	15221	17578	18425	20153	21796	25071	26107	28123	29752	32106	34014	36323	37592	40982	41530	42756	45812	46050	47769	49016	50656	50224	50047	50264	49979	50443	49398	49188	48078	47552	46714	46790	44254	43083
D5	3248	3443	3682	4116	4384	4949	5493	5914	6797	7893	8591	9549	10725	11378	12934	14488	16341	17595	18922	21095	22267	24460	26124	28172	30227	32073	33964	35991	38611	39672	41043	42345	42557	44001	45775	45793	46539	47969	46984	47920	46959	47015	46722	44913	44936	44090	43499	42370	40601
D6	3130	3430	3558	4329	4313	4983	5946	6101	7306	8003	8812	10093	11089	12561	13743	14706	16294	18313	18821	21402	23449	25724	27822	30014	30308	33227	35342	37117	38660	40327	42345	43235	44133	45502	46495	47890	47461	48920	49212	48344	48439	48687	48042	47689	47282	44471	44049	43157	40920
E4	3608	3400	3722	4383	4803	5216	5864	6467	7786	8361	9402	10154	11351	12656	14201	14829	16152	18339	19714	22091	24225	25532	27497	30387	31954	34165	36993	37984	39788	41577	43145	44372	46250	47107	47698	48833	49364	51279	49950	49445	49566	49008	48998	48534	47434	46638	46169	44684	43560
E5	3357	3248	3640	3755	4392	4771	5424	6059	6865	7490	8590	9272	10575	11616	12375	13607	15407	17393	18009	19889	22221	23518	25527	27473	28915	30890	33083	35065	36154	37874	39430	40645	42457	43299	44192	43957	44830	45574	45401	47100	46507	45109	44616	44603	42758	42309	42535	40989	38709
E6	3467	3549	3879	4572	4422	5381	5914	6418	7230	8229	8776	9816	11412	12482	13591	14705	16178	18325	20258	22735	24602	25677	27008	30150	31455	33572	35029	36655	38362	40105	42341	43381	45024	45851	46532	47336	48783	48052	49334	49269	48770	48655	48788	47063	45808	44925	44257	43089	42240
F4	3469	3612	4076	4320	4560	4960	5871	6562	7353	8538	8496	10341	11482	12887	14240	15035	16742	18293	20038	21580	23402	25439	27856	29438	32029	33115	35765	36467	38822	41656	43210	43818	45628	47413	46932	48879	48907	49903	50019	50094	48961	49311	47927	48703	46521	45782	45894	43502	42854
F5	3454	3031	3941	3702	4350	4640	5604	5760	6868	7620	8502	9294	10401	11506	12652	14308	15218	17622	18398	20458	22202	23435	26330	27593	29271	31491	32954	34549	36852	38172	39657	40409	42316	42776	44459	44374	44879	46085	46458	46041	45511	45668	45096	44496	43458	42352	41761	40791	39142
F6	3566	3403	3972	4443	4457	5125	5665	6342	7186	7894	8831	9998	11159	12279	13209	14727	16726	18645	20488	21808	22887	25471	26893	29072	30725	33722	36169	36153	38580	40834	42163	42882	45217	46190	46668	48529	48122	48979	49659	48744	48009	49266	47042	47119	47642	44697	45475	42140	42013
G4	3448	3919	4178	4626	4744	5557	6014	6907	7472	8880	8949	10727	11531	12494	14260	15822	17605	19123	21100	22172	24676	25937	28369	30293	31873	34672	36917	38280	40123	41187	43816	44570	45516	45998	48268	49137	50532	49778	50709	49707	50342	49538	49585	49014	48033	46506	45929	44666	43488
G5	3129	3276	3493	3800	4212	4705	5477	5832	6614	7712	8293	9489	10490	11558	13014	13885	15404	17551	17916	20387	22383	23315	25868	27270	29470	31858	33770	34981	36929	37863	40429	40771	42841	43951	44892	45340	46339	44296	46063	45426	45653	45469	45583	43947	43776	42466	43478	41331	39527
G6	3517	3553	3977	4268	4793	5149	5963	6632	7542	8192	9225	10194	11269	12126	13844	14759	16361	19225	19540	21820	23697	25065	27190	30325	31313	34002	35751	36852	38855	41488	42685	43747	44726	46842	48107	47982	49339	49795	48909	50045	49532	49815	48261	48272	46963	46393	45881	44322	42437
H4	3496	3356	3959	4445	4662	5246	6160	6692	7602	8450	9643	10288	11308	13231	13624	15340	17147	19387	20309	21751	23967	26207	28124	30546	32692	34703	36138	38082	40035	41187	43348	43942	45668	46302	48628	48568	48792	50675	50394	49697	50628	50423	49709	48166	47293	46402	45593	44451	43820
H5	3192	3390	3434	4134	4389	4875	5857	6050	6929	7882	8712	9245	10511	11865	13315	13843	15430	18172	19266	20820	22718	23957	26100	28475	29842	31544	33111	35766	37510	39239	41453	41885	43155	44417	44759	45243	46813	46627	46548	47639	46421	46701	45881	45298	44850	43030	43553	40505	40053
H6	3211	3652	3728	4063	4578	5389	5941	6842	7668	8010	9116	10171	11183	12683	13541	14801	16213	18662	19847	21458	24045	25270	27463	30029	31801	33812	35929	37737	39186	41288	43582	43532	45223	47130	47617	49088	48854	48278	48819	49406	48539	49011	47922	46972	45607	46226	45124	43715	42168
															TMR int.	SiR int.	Ratio (TMR/SIR)			[NADP+] (M)	Mean Ratio (TMR/SIR)	SD
														A4	37608	12569	2.99212			0.02	2.96049	0.0934116
														A5	35595	12466	2.85537			0.002	3.75354	0.0830882
														A6	38222	12598	3.03397			0.0004	4.16013	0.0859103
														B4	50149	13033	3.84785			8e-05	4.21017	0.109294
														B5	46290	12438	3.72166			1.6e-05	4.3016	0.028206
														B6	48767	13212	3.69111			3.2e-06	4.15915	0.0293005
														C4	50833	12516	4.06144			3.2e-07	4.23816	0.060984
														C5	47501	11261	4.21819			3.2e-08	4.30116	0.0553315
														C6	49485	11780	4.20076
														D4	50047	12254	4.08414
														D5	47969	11211	4.27874
														D6	48920	11463	4.26764
														E4	51279	12000	4.27325
														E5	45574	10526	4.32966
														E6	48052	11170	4.30188
														F4	49903	11908	4.19071
														F5	46085	11151	4.13281
														F6	48979	11791	4.15393
														G4	49778	11883	4.18901
														G5	44296	10499	4.21907
														G6	49795	11563	4.30641
														H4	50675	11638	4.35427
														H5	46627	10830	4.30536
														H6	48278	11376	4.24385
[truncated: 152 more columns]
