# Supplementary material for: Semisynthetic biosensors for mapping cellular concentrations of nicotinamide adenine dinucleotides
Source: eLife. 2018 May 29;7:e32638. doi: 10.7554/eLife.32638 (PMC5990361; doi:10.7554/eLife.32638)
Supplement: Figure 2—source data 5. [file elife-32638-fig2-data5.xlsx]

## Sheet: Figure_2e
	Control (only NADP+)		10 mM ATP		1 mM ADP		1 mM GTP		100 uM NMN		100 uM nicotinamide		100 uM NAD+		100 uM NADH		100 uM sepiapterin
[NADP+] (M)	Ratio (TMR/SiR)	SD	Ratio (TMR/SiR)	SD	Ratio (TMR/SiR)	SD	Ratio (TMR/SiR)	SD	Ratio (TMR/SiR)	SD	Ratio (TMR/SiR)	SD	Ratio (TMR/SiR)	SD	Ratio (TMR/SiR)	SD	Ratio (TMR/SiR)	SD
0.0001	0.539495	0.0119499	0.554047	0.00596686	0.588353	0.0131772	0.590662	0.00111982	0.593196	0.0219807	0.567763	0.0135835	0.581065	0.0326748	0.576696	0.0134563	0.615031	0.0215497
1e-05	0.572013	0.0130934	0.598911	0.0154564	0.601408	0.0138805	0.611019	0.00641603	0.623929	0.012443	0.605674	0.0170401	0.612195	0.0105281	0.614178	0.0100916	0.631855	0.0131401
1e-06	0.731569	0.0114454	0.752072	0.0263062	0.773175	0.0181521	0.805416	0.0155352	0.809344	0.0191852	0.760576	0.0198569	0.747044	0.0173272	0.798137	0.00980434	0.789299	0.00644197
2e-07	1.05458	0.0270083	1.08135	0.0430849	1.16353	0.0156635	1.21231	0.0258218	1.21249	0.0303645	1.07408	0.0233224	1.06985	0.0116099	1.17719	0.026181	1.14176	0.0120183
4e-08	2.02194	0.067095	1.98552	0.0376311	2.10471	0.0953156	2.19518	0.0558713	2.27523	0.0291438	2.13933	0.0374587	2.0116	0.0333364	2.1816	0.0908272	2.01541	0.00561936
8e-09	3.3132	0.0627998	3.22902	0.0362729	3.4817	0.117314	3.39606	0.118037	3.56496	0.00616735	3.50447	0.106971	3.31287	0.113053	3.3392	0.0746598	3.30499	0.0508306
8e-10	4.0535	0.0662775	4.04931	0.0118253	4.0453	0.0810128	4.05835	0.0992684	4.29131	0.131704	4.20849	0.0761955	3.98523	0.0741837	3.87491	0.120057	3.99328	0.0517924
8e-11	4.1316	0.131545	4.13648	0.0620078	4.31592	0.110642	4.13513	0.201093	4.35049	0.149308	4.28171	0.126456	4.0253	0.0562272	4.24683	0.0790138	4.16812	0.0333493

## Sheet: NADP_control
Titration of NADP-Snifit with NADP+
Wavel. (nm)	540	541	542	543	544	545	546	547	548	549	550	551	552	553	554	555	556	557	558	559	560	561	562	563	564	565	566	567	568	569	570	571	572	573	574	575	576	577	578	579	580	581	582	583	584	585	586	587	588
A4	4615	4048	3136	3089	2798	2559	2882	2867	2863	3366	3606	3799	4257	4897	4703	5447	5725	6532	6952	7322	8071	8323	8953	9780	10156	10442	11355	11962	12232	12838	13542	13309	13988	14424	13973	14763	14433	14749	14959	14842	14402	14450	14018	13589	13767	13588	12879	12961	12293
A5	5105	3826	3167	3061	2835	2415	2944	2861	3082	3304	3692	3802	4354	4795	4998	5604	5825	6513	7221	7737	8051	9017	9152	9424	10194	10904	11199	11863	12838	13289	13163	13744	14207	14316	14730	14880	14459	14607	14597	14503	14657	14778	14613	14565	14185	13615	13409	12868	12557
A6	4942	3882	3470	3090	2893	2918	2861	2896	3334	3405	3581	3769	4313	4645	5122	5467	6162	6399	6752	7672	7887	8809	9017	9639	10588	10766	11332	12034	12342	13174	13259	13627	13867	14434	14395	14600	15008	15522	14725	14689	14723	14952	14791	14423	14146	13909	13409	12833	12751
B4	5386	3661	3607	3100	3052	3054	2910	3122	3506	3774	3775	3872	4782	5048	5391	5792	6694	6766	7661	8030	8608	9424	9815	10655	11513	11750	12510	12872	13424	13967	14310	15072	15334	15465	16076	15962	16386	16574	16054	16139	16426	15933	15780	15506	15123	14705	14656	14270	13534
B5	5491	4138	3473	3008	2981	2934	3063	3018	3085	3789	3927	4194	4397	4974	5608	5848	6125	6666	7298	8314	8306	9352	9795	10392	10991	11926	12129	13160	13292	14152	14768	14614	15087	15283	15653	15538	16027	16059	16329	16108	15698	15816	15739	15131	14559	14767	14885	14463	13588
B6	5748	3946	3382	3148	2960	2906	3279	3343	3390	3649	3936	3878	4567	5142	5304	5945	6183	6962	7271	7845	8794	9609	9943	10600	11260	11919	12393	12731	14067	14197	14621	15135	14841	15898	15647	16262	15914	16754	16603	16549	15823	15927	15330	15488	15117	14685	14336	13734	13880
C4	5759	4212	3680	3341	3181	2966	3251	3361	3682	3945	4145	4755	4927	5910	6306	6410	7487	8061	8624	9131	9997	10525	11422	12196	12798	13560	14344	14992	15486	16401	16972	17597	17847	18369	18509	19089	18962	19167	18839	18920	19663	18379	18679	18802	18077	17810	16958	16425	16531
C5	5609	4070	3398	3222	3284	3190	3519	3488	3617	4043	4464	4927	5059	5614	6295	6539	6960	7971	8473	9061	9436	10866	11360	12253	13046	13551	14361	15119	15452	16401	17111	17773	17248	17602	18138	18593	18763	18810	19074	18732	18377	18535	17913	17847	17648	17552	16373	16430	15767
C6	5600	3983	3556	3327	3001	3449	3267	3574	3614	3945	4325	4923	5195	5502	6320	6444	7122	8014	8772	9084	10168	10586	11417	11969	13407	13977	14371	15132	15561	16369	17042	17409	17823	18139	18720	19004	18744	19035	19317	18998	18931	18380	18397	18014	18130	17719	17040	16792	15810
D4	5750	4119	3748	3629	3521	3640	3632	4200	4542	4937	5172	5825	6286	6424	7423	7757	9204	9740	9946	11394	11991	12988	14112	14996	16251	17512	18254	19152	19984	20541	21209	22230	22939	23407	23862	24306	24271	24261	24450	24332	24441	23876	23964	23453	22871	22754	21816	21322	20279
D5	5982	4277	3825	3473	3516	3587	3971	4050	4042	4658	5014	5566	5985	6750	7440	8269	8897	9748	10020	11472	12442	13321	14018	14892	15712	16534	17986	18422	19584	20621	21702	21729	22874	22944	23504	23737	24240	24180	24030	23669	23854	23473	22992	22952	22786	21894	21663	21409	20051
D6	5875	4364	3599	3693	3521	3597	3984	4078	4294	4680	5183	5744	6415	7133	7604	7894	9097	9707	10821	11322	12570	13721	14203	15276	16844	16602	17972	19713	19779	20586	22088	22547	23223	23672	23702	24487	23927	24656	25323	24790	24596	24144	24370	23009	23983	22701	22164	21315	20849
E4	6071	4905	4522	4275	4196	4710	4613	5148	5538	6106	6647	7445	8334	9173	10260	10783	12206	13262	14706	15678	17142	18459	19407	21439	22207	23941	24933	25963	27596	28999	30453	31885	31667	33185	33070	34299	33994	34213	34939	35120	34764	34278	33408	33000	32773	31648	31370	30971	29542
E5	6176	4556	4679	4373	4202	4715	4797	5280	5700	6124	6962	7532	7975	8797	10370	10857	11741	13050	14235	15457	17028	18073	19976	21221	22740	23859	25422	26332	28002	29380	30095	31729	31860	32791	33421	34456	34199	35267	34681	35364	34390	34923	33412	33589	33087	32763	30875	30840	29969
E6	6228	4941	4446	4101	4058	4529	4807	5516	5611	6107	6972	7369	8413	8891	9961	11073	11656	13223	13890	15744	16592	18070	19810	21026	22261	23676	25563	26057	27641	29042	30111	31319	31712	32865	33001	33742	34529	34419	34936	35077	34361	34937	33248	33805	33547	32052	31782	30594	29496
F4	6905	5418	4935	4894	4824	5133	5449	6011	6568	7031	7530	8968	9725	10820	11814	12685	14534	15492	16773	18114	20205	20876	23430	25213	26433	28132	29748	30850	32752	35268	35877	36619	38010	38662	39612	40525	40903	40853	42125	41095	41455	41472	41079	39674	39458	38765	37819	37413	35629
F5	6526	5045	4851	4542	5065	5235	5572	5801	6311	7007	7515	8503	10153	10852	11858	13211	14349	15998	17009	18504	20389	21919	23640	25815	26854	28947	29657	31593	33482	35131	36377	37409	38830	40340	40476	40799	42154	41210	41990	41665	41995	42568	41392	41170	40084	39440	38284	37170	36727
F6	6550	4885	4737	4588	4463	4979	5583	5863	6430	7369	7445	8379	10050	10990	11614	12964	14538	15701	16979	18612	19990	21583	23107	25406	26446	28350	29513	31003	33577	34821	36343	36888	38100	40005	40036	40817	40528	42552	42230	41000	41179	41448	40557	40051	39448	38051	37718	36668	36049
G4	6710	5260	5059	5042	4982	5686	5838	6635	7009	7520	8311	9406	10445	11426	13012	14052	15839	16937	18350	20103	21876	23716	25572	26753	28486	30617	32970	34814	36458	37902	38887	40354	41477	43092	44411	44715	45446	44901	45188	45526	46087	45549	44842	43807	43520	42252	41365	41582	39268
G5	6808	5576	4937	4754	5051	5540	5732	6493	6993	7662	8299	9489	11190	11005	12727	13773	15215	16643	18315	19710	21844	23099	24964	26923	28366	30218	31942	33457	35732	36715	38469	39035	41457	42170	43303	44081	44628	44964	44542	44907	43954	44496	43287	42620	42325	42268	40309	38997	38623
G6	6463	5167	5443	5082	5260	5630	5792	6377	7295	7913	8274	9312	10542	11379	13117	13513	15793	17497	18143	20303	22036	22942	25476	27132	28889	30757	32577	33660	35511	37710	38928	40548	41493	43246	43514	43743	44743	44873	45033	45184	44519	44314	44586	43742	43168	42559	40998	40216	38944
H4	6663	5511	4962	5198	5159	5825	6146	6657	7240	8235	8933	9848	10807	12005	13779	14621	16465	17789	19431	20453	23047	24370	26674	28431	29974	31959	33449	36058	37243	39557	40866	41800	43522	44426	45708	46631	47141	46896	46795	47332	47573	47100	46242	44788	45086	43145	43381	42278	40920
H5	6657	5698	5433	5566	5457	6202	6539	7055	7736	8671	9215	10331	11317	12383	13993	15039	16449	18167	19420	20794	22607	24212	26593	28226	30025	32203	33680	34571	37645	39145	40692	41831	42349	44247	45028	44879	45713	46137	46204	46349	46490	46342	45274	44590	43251	42968	43102	40970	40072
H6	6675	5395	5118	5092	5121	5760	6077	6375	6810	7891	8304	9225	10652	11334	13023	14052	15387	16817	18450	19436	21687	23125	25239	27114	28219	30472	32176	34224	35771	37368	38273	40505	41042	41945	42158	43284	44747	43201	43987	43874	43567	44170	43949	43076	41488	41043	39787	39453	38233
															TMR int.	SiR int.	Ratio (TMR/SIR)			[NADP+] (M)	Mean Ratio (TMR/SIR)	SD
														A4	14749	27728	0.531917			0.0001	0.539495	0.0119499
														A5	14607	27390	0.533297			1e-05	0.572013	0.0130934
														A6	15522	28055	0.55327			1e-06	0.731569	0.0114454
														B4	16574	29172	0.568148			2e-07	1.05458	0.0270083
														B5	16059	28611	0.561288			4e-08	2.02194	0.067095
														B6	16754	28561	0.586604			8e-09	3.3132	0.0627998
														C4	19167	25767	0.743858			8e-10	4.0535	0.0662775
														C5	18810	25780	0.729635			8e-11	4.1316	0.131545
														C6	19035	26393	0.721214
														D4	24261	22865	1.06105
														D5	24180	23592	1.02492
														D6	24656	22877	1.07776
														E4	34213	17575	1.94669
														E5	35267	16992	2.07551
														E6	34419	16842	2.04364
														F4	40853	12335	3.31196
														F5	41210	12676	3.25103
														F6	42552	12602	3.37661
														G4	44901	10887	4.12428
														G5	44964	11261	3.9929
														G6	44873	11098	4.04334
														H4	46896	11612	4.03858
														H5	46137	10921	4.22461
[truncated: 152 more columns]

## Sheet: ATP
Titration of NADP-Snifit with NADP+ and a fixed concentration of 10 mM ATP
Wavel. (nm)	540	541	542	543	544	545	546	547	548	549	550	551	552	553	554	555	556	557	558	559	560	561	562	563	564	565	566	567	568	569	570	571	572	573	574	575	576	577	578	579	580	581	582	583	584	585	586	587	588
A1	3946	3873	3435	3038	2819	2562	2694	2913	3211	3109	3655	3727	3792	4550	4988	5284	5683	6114	6470	7106	7781	8059	8780	9003	9698	10342	10657	11357	11923	12292	12705	12698	12907	13086	13895	14131	13467	14099	14202	14156	13612	13903	13497	13741	13118	12666	12562	12444	12539
A2	4937	3697	3118	2800	2668	2729	2690	2757	2964	3138	3528	3747	4197	4252	4423	5313	5948	6025	6589	7348	7451	8403	8770	8852	10341	10369	10722	11635	12224	12610	12484	13066	13341	13729	14097	14164	14476	14038	13899	13710	14047	14045	13740	13298	12820	13044	12954	12557	12115
A3	6070	3858	3353	2918	2716	2855	2654	3030	3290	3253	3514	3628	4221	4720	4645	5581	5815	6539	6686	7538	7914	8359	9059	9471	10085	10674	11124	11919	12476	12724	13007	13596	13704	13885	14193	14607	14723	14496	14814	14416	14369	14499	14185	14165	13715	13544	13087	12834	12201
B1	5839	3755	3120	3164	2772	2991	2873	2969	3064	3527	3676	3795	4196	4952	5060	5442	6185	6505	7027	7568	8328	8763	8841	9725	10770	11257	11687	12045	13053	13253	13981	13912	14703	14534	15155	15398	15247	15622	15207	15585	15288	15149	14828	14947	13876	14136	14104	13378	13322
B2	5573	3647	3559	2872	2759	2571	2733	2757	3231	3654	3774	3898	4303	4785	5222	5472	6048	6346	7145	7508	8356	8743	9539	10217	10731	11068	12047	11633	12747	13469	13902	13688	14461	14531	14657	15661	15611	15707	15710	15438	15240	14997	15086	14618	14742	13773	13871	13397	12994
B3	5427	3698	3384	2945	2865	2717	2954	3106	2983	3306	3777	4019	4528	4787	5131	5274	6126	6523	6945	7465	8151	8359	9342	9985	10498	11547	11764	12491	13623	13418	13869	14354	15045	14838	15254	14843	15549	15588	16105	15844	15140	14880	14702	14928	14608	14618	14100	13548	13406
C1	5586	3791	3393	3139	2928	2910	3093	3347	3507	3481	4083	4328	4728	5259	5739	6101	6687	7270	8145	8468	9188	10095	10652	11082	11712	12763	13322	13720	15103	15620	15512	16355	16166	17594	17645	17796	17760	18024	17992	17554	18015	17425	17272	17248	17097	16021	16097	15399	14825
C2	5853	3518	3333	3225	3139	3017	3165	3347	3451	3654	4414	4675	5124	5337	5643	6456	7208	7635	8005	8862	9544	9941	11241	11275	11949	12942	13578	14590	15029	15219	16505	16366	17019	17748	18230	18015	17815	18067	18410	18336	18228	18406	17599	17047	16891	16898	16585	16240	15054
C3	5046	4030	3356	3161	3129	2958	3114	3207	3533	3898	3996	4562	4866	5159	5822	6075	6872	7048	8314	8712	9417	9883	10780	11665	12590	13132	13602	14383	15270	15424	16353	16630	16773	17351	17238	17117	17596	17939	18163	18261	18047	17502	17275	17146	17196	16073	16093	16453	15200
D1	5612	4375	3826	3765	3598	3674	3668	3798	4137	4390	4938	5336	5917	6569	7108	7798	8200	9276	9921	10982	12053	12199	13803	14614	15343	17154	17293	18075	18735	19341	20942	21449	21938	21972	22466	22816	22501	23509	23022	23463	22912	22848	23153	22121	21877	20819	21193	20787	20384
D2	5576	4325	3899	3411	3363	3465	3633	3820	4110	4527	4905	5250	5910	6498	7321	7670	8920	9336	10005	11147	11650	12760	13076	14746	14968	16530	17231	18131	19094	20187	20674	21392	22238	21650	22825	22663	23480	23132	23485	23065	23319	23651	22918	22121	22467	21560	21068	20302	19927
D3	5791	4177	3835	3480	3371	3533	3340	3777	4099	4358	4786	5349	5709	6590	7027	7808	8339	9013	10057	10762	11022	12838	13383	14062	14656	16558	16546	17588	18298	18815	19412	20577	20797	21582	22072	22108	22151	22681	23173	22962	22610	22557	21784	21998	21238	21141	20277	20010	19033
E1	6080	4359	4242	4227	3854	4175	4630	4932	5132	5793	6511	7268	7902	8222	9484	10552	11415	11922	13356	14667	16200	17270	18869	19427	20852	23188	23915	24765	26137	27164	28250	29499	29256	30292	31141	32053	31766	32704	32081	32659	32091	32028	31948	30726	30948	29931	29245	28384	28250
E2	5951	4771	4291	3981	4176	3960	4392	4901	4955	5361	6312	7195	7722	8011	8971	10136	11373	11974	13121	14866	15957	16701	18648	19979	20752	22286	23103	24682	25948	26816	27606	29232	29503	29732	30649	31249	31390	30974	32673	31679	32184	31562	31840	31026	29721	30490	29374	29057	26957
E3	6073	4521	4253	4022	3951	3991	4429	4847	5267	5489	6515	7069	7625	8516	9417	10254	10950	12874	13116	14008	15747	16354	18290	19914	20602	22347	23243	24325	25699	27269	28128	28934	28784	30164	31046	31350	32366	31589	31502	31404	32476	32002	31588	31510	30452	29643	29059	28739	28232
F1	6420	5079	5021	4600	5133	4990	5115	5969	6067	7021	7846	8575	9434	10713	11808	12031	13781	15068	17056	18531	20251	21490	23957	24803	26563	28670	28999	31125	32913	34760	35046	36945	37730	38422	39631	39320	40637	40557	41762	40741	39969	39872	40454	39813	38924	37732	37735	36710	35817
F2	6313	5194	4956	4702	4782	5015	5162	5754	5822	6671	7440	8701	8996	10476	11484	12240	13568	14467	16317	18061	20230	20846	22379	24170	25365	26760	28770	30536	31346	33516	34836	36200	36428	37701	37914	38880	39060	39520	40688	40552	39466	39623	38782	38814	37365	37485	36537	35890	33889
F3	7048	5009	4711	4638	4626	4767	5366	5920	6208	6742	7791	8844	9588	10569	11114	12852	14364	14906	16949	18289	19632	20836	23268	24243	26203	28245	29675	31011	32007	34769	35634	36129	37177	38481	38904	39821	39604	40519	41420	40932	40682	40531	39197	39458	38372	37510	37312	36472	34981
G1	6855	5221	4744	4763	4999	5322	5964	6333	6823	7389	8367	9092	10186	11230	12457	13598	15300	16268	17703	19965	21289	23298	24840	26834	28142	30478	31362	34084	34823	37235	38274	39577	40965	41471	42775	43375	43687	44858	44689	43582	43609	43292	43178	43784	42448	40753	39555	38630	38413
G2	6875	5151	4918	5043	5136	5262	5474	5900	6587	6997	8336	8868	9755	11114	12252	13331	14784	15910	17253	18987	20772	22190	24102	25457	27571	29579	30470	32924	34752	35455	37617	38538	39411	39776	41104	42472	43300	42662	43132	44241	43041	43120	42732	42269	41083	40385	38799	39067	36682
G3	6523	5471	5073	5111	4996	5355	5829	6333	6821	7709	8413	9429	10600	12031	12573	13907	15226	16604	18710	19663	21167	23417	25242	26877	28589	30949	31315	34262	36224	36390	38493	39569	40546	42826	42212	43971	43991	44834	44168	45398	45473	44287	44645	42691	42535	41464	40980	40219	39322
H1	6532	5273	5199	5055	5079	5390	5961	6636	6986	7841	8780	9992	10633	11752	13027	14403	15821	16595	18513	20273	21480	23303	25633	27231	29077	30560	32455	34491	35700	37303	39486	40304	41705	43233	43917	44603	44857	45382	45413	45674	45275	45101	44801	44063	43265	42115	41206	40337	37517
H2	6672	5051	4923	4474	5279	5359	5324	6239	6675	7721	8559	9475	10264	11173	12559	14019	15165	15953	17316	19779	20673	22867	24780	26430	28104	30877	31006	33488	35101	36838	38248	38637	39832	41542	42923	43207	43859	44556	43958	45168	44951	44499	43854	42324	41955	40455	39862	39676	37794
H3	6907	5273	5334	4915	5094	5290	5924	6563	7451	7688	8548	9536	10168	11543	13207	14330	15319	16652	18478	19724	21322	23567	26065	26995	28452	31225	32733	34438	35427	37663	39510	40351	42007	42902	43633	43657	44557	45569	44679	45106	45427	45393	44490	44151	44031	41759	41572	40349	38588
															TMR int.	SiR int.	Ratio (TMR/SIR)			[NADP+] (M)	Mean Ratio (TMR/SIR)	SD
														A1	14099	25706	0.548471			0.0001	0.554047	0.00596686
														A2	14038	25370	0.553331			1e-05	0.598911	0.0154564
														A3	14496	25870	0.56034			1e-06	0.752072	0.0263062
														B1	15622	26745	0.584109			2e-07	1.08135	0.0430849
														B2	15707	25542	0.614948			4e-08	1.98552	0.0376311
														B3	15588	26081	0.597676			8e-09	3.22902	0.0362729
														C1	18024	23203	0.776796			8e-10	4.04931	0.0118253
														C2	18067	23930	0.754994			8e-11	4.13648	0.0620078
														C3	17939	24763	0.724428
														D1	23509	21291	1.10418
														D2	23132	20873	1.10823
														D3	22681	21985	1.03166
														E1	32704	16123	2.02841
														E2	30974	15819	1.95803
														E3	31589	16034	1.97013
														F1	40557	12545	3.23292
														F2	39520	12385	3.19096
														F3	40519	12417	3.26319
														G1	44858	11100	4.04126
														G2	42662	10550	4.04379
														G3	44834	11035	4.06289
														H1	45382	10853	4.18152
														H2	44556	10705	4.16217
														H3	45569	11208	4.06576
[truncated: 152 more columns]

## Sheet: ADP
Titration of NADP-Snifit with NADP+ and a fixed concentration of 1 mM ADP
Wavel. (nm)	540	541	542	543	544	545	546	547	548	549	550	551	552	553	554	555	556	557	558	559	560	561	562	563	564	565	566	567	568	569	570	571	572	573	574	575	576	577	578	579	580	581	582	583	584	585	586	587	588
A7	4488	3560	3106	2771	2610	2641	2745	2821	2841	3347	3369	3494	4105	4161	4986	5185	5438	6097	6379	6986	7688	8243	8596	9350	10155	10418	10717	11330	11720	12123	12547	12932	13008	13538	14135	14158	14075	14160	13992	13879	14035	13909	13547	13296	13360	12933	12706	12087	11698
A8	5539	3359	2826	2930	2715	2732	2676	2833	2805	3384	3763	3739	4072	4394	4904	5076	6039	5957	6705	7483	7927	8448	8988	9354	10145	10815	11397	11676	11983	12861	12824	13575	14132	14112	14611	14397	14564	14951	14755	15147	14429	14011	14014	13896	13474	13230	12857	12709	12334
A9	5069	3486	3327	3018	2551	2852	2995	2721	3050	3275	3401	3904	3981	4253	4810	5195	6139	5931	6657	7148	7749	8147	8507	9230	10002	10669	10800	11705	11949	12614	12649	13200	13328	13492	13889	14153	14635	14638	14032	14335	13832	14125	14051	13719	13746	12681	12501	12753	11974
B7	5444	3733	3437	3056	2997	2667	2817	3004	3387	3580	3600	3884	4313	5051	5223	5722	6089	6850	7362	7890	8554	9203	9727	10236	10927	11228	12021	12616	12990	13811	13861	14575	14255	15364	15244	15381	15585	15201	15351	15900	15671	15684	15425	15146	14494	14112	13336	13712	12819
B8	5301	3788	3313	2872	2835	2748	2832	2917	3249	3398	3866	3948	4326	4707	5105	5300	6169	6549	7341	7523	8216	8874	9722	10048	10894	11201	12105	11907	13211	13352	13404	13896	14361	14479	15349	15222	15281	15338	15160	14900	14752	15127	15016	14824	14216	14040	13404	13263	13025
B9	5118	3552	3248	2926	3011	2707	2810	2905	3229	3443	3752	4112	4459	4955	5243	5744	6111	6490	7175	7772	8540	8603	9796	9969	10768	11373	12157	12344	12519	13936	13566	14772	14600	14701	15563	15387	15563	15496	15149	15467	15266	15568	15183	14914	14573	14486	14143	13123	13396
C7	5429	3844	3442	3176	3225	3172	3165	3446	3746	4019	4042	4808	4979	5556	5959	6647	7253	7705	8080	8731	9577	10288	11149	11865	12273	13653	14212	15041	15088	15551	16315	17338	17444	18023	18073	18363	18619	18486	18480	18193	18685	18119	17996	18304	17280	17183	16462	16424	15918
C8	5369	3891	3566	3039	3203	3117	3159	3421	3643	3918	4072	4794	5026	5385	5884	6612	7296	7531	8159	9656	9942	10613	11551	11856	12804	13090	14126	15131	15576	15947	16556	17026	18167	17731	18634	19035	18507	18387	18976	19226	18946	18575	17907	18115	17428	17548	16783	16184	16049
C9	5328	3979	3503	3364	3006	3153	3071	3450	3670	3733	4443	4592	5067	5613	6170	6911	7052	7986	8390	9268	9729	10457	11342	12095	12363	13751	14151	14691	15163	16157	16470	17385	17893	18230	18353	18326	18791	18761	18817	18262	18790	18277	18195	17681	18148	16509	16933	16436	15547
D7	6137	4268	3616	3550	3585	3467	3792	3927	4054	4736	5186	5437	6235	6881	7597	8223	9064	9786	10645	11071	12327	13379	14159	14802	16023	17184	17452	18673	19407	20456	20644	21860	22372	23253	23219	23939	23795	23850	24243	23663	23901	23842	23901	22702	22997	22400	21741	20917	20403
D8	5494	4126	3879	3455	3745	3711	3947	3940	4403	4693	5348	5553	6395	7176	7314	8167	9188	9689	11161	11387	12336	13558	14472	15126	16495	17490	18418	19365	20205	20768	21945	21823	22590	23084	24216	24157	23585	24725	25229	24200	24463	23888	24621	23870	22809	22835	22340	21710	21625
D9	5544	4288	3855	3789	3516	3648	3786	3850	4425	4784	5259	6002	6134	6735	7375	8167	9304	9718	10450	11562	12608	13623	14717	14979	16515	18047	18830	18634	19672	20749	21948	22234	23127	23600	23585	24389	23897	24860	25044	24574	24303	24543	23504	23957	23468	23124	22517	21098	21048
E7	6015	4570	4189	4075	4148	4460	4634	5037	5323	5973	6730	7343	7804	9013	9481	10720	11802	12743	13681	15427	16774	17670	19434	20202	21681	22886	24120	25670	27134	27707	29424	29951	31356	31040	32044	32174	33475	34269	34065	32855	33437	33640	32640	32156	31829	31290	30657	30044	29228
E8	5995	4550	4288	3864	4246	4312	4580	5094	5241	5935	6463	7409	7915	9022	9200	10415	11613	12475	13255	14924	16432	17347	18510	20251	21272	23125	24502	25497	26216	27081	29243	29626	31178	31248	32421	32308	32890	32462	32896	32470	32919	32329	32822	32213	31024	31134	29730	29225	27899
E9	5840	4546	4394	3987	4139	4487	4650	5129	5441	5822	6790	7433	7797	9126	9974	11143	11822	12806	14085	15176	15782	17871	19105	20741	21710	23648	24363	25696	27213	28113	29083	30695	30793	31847	32826	32919	33532	33360	33888	33691	33770	34051	33243	32465	31989	31479	30514	30355	28510
F7	6034	4929	4718	4395	4881	4615	5279	5504	6230	6796	7610	8380	9457	10371	10988	12412	13930	15043	16658	18275	19897	20568	22332	23790	26045	27847	28590	30809	32207	33308	34032	35733	36460	37933	37901	39208	39427	40164	40426	38330	40032	39159	39270	39401	38416	37057	36644	35140	34441
F8	5987	4752	4471	4434	4623	4647	5077	5520	6294	6763	7813	8432	9188	10203	11195	12612	13587	14413	16371	17814	19277	21039	22818	23939	25656	27013	28553	30418	32038	33156	34404	35702	36478	37311	38782	39178	39318	40051	40714	39882	40245	39535	39380	38094	38142	37691	35822	34584	34583
F9	6014	4766	4585	4444	4550	4977	5387	6007	6211	7378	7592	8598	9569	10599	11275	12815	14035	14918	16583	17937	20107	20713	23298	23818	26085	27664	28216	30779	32441	33956	35266	36460	38100	37685	38511	39653	40396	40231	41425	40886	40088	40848	39892	39301	38996	38063	37123	35564	34903
G7	6187	4920	4957	4798	4706	4836	5296	5985	6450	7287	7645	8898	9796	10929	12043	12486	14392	15425	17495	18598	20212	22011	23487	25463	26639	28901	30328	31569	33481	35399	35675	37777	38794	39233	41051	41638	41269	41605	42519	42424	41929	41986	41070	40140	39403	39096	37094	37555	36424
G8	6414	4821	4732	4707	4981	5157	5349	6014	6427	7056	8114	8858	9668	10798	11808	12834	14601	15796	17099	18903	20318	21757	24082	25008	26557	28887	29867	32253	34063	34944	36483	37029	38008	40404	39995	41212	41642	41960	42382	41749	42699	42318	40644	40533	39892	38551	38116	36918	35989
G9	6146	5222	4757	4707	4987	5105	5409	5803	6309	7256	8250	9044	9710	11072	11774	12721	14839	16020	17130	19021	21059	22196	23572	25696	27266	28627	30219	31840	34058	36181	35878	38083	38535	39780	41537	42208	42320	41974	42648	42569	42916	42079	41635	42139	40379	39683	38939	38090	36486
H7	6413	4941	4865	4632	4777	5124	5402	6231	6575	7526	8643	9185	9743	11038	12267	14192	15475	16519	17706	19541	20736	22699	24741	26342	27967	29361	30946	32870	34387	35771	37528	39643	39981	41540	41798	42011	42358	43255	42716	43519	43644	43424	42585	41732	41174	39823	39674	38054	37511
H8	6217	5156	4769	4835	5061	5395	5576	6070	6703	7445	8644	9331	9957	11280	12421	13162	15081	16413	17592	19640	20679	22588	24690	25741	28196	29492	31782	33349	34209	36507	37739	39404	39803	40560	41498	42493	43117	43706	43525	44317	44399	43514	42221	42505	41731	40801	39987	39220	37502
H9	6490	5061	5024	4664	5108	5200	5989	6250	6734	7679	8787	9635	10616	12032	12618	14152	15974	17133	18429	19536	21468	23308	25249	27543	28359	30700	32070	33396	35651	36598	38574	40937	40641	41492	42888	43439	44260	44436	45121	44853	44699	44774	43167	43529	42104	41101	40377	39571	38567
															TMR int.	SiR int.	Ratio (TMR/SIR)			[NADP+] (M)	Mean Ratio (TMR/SIR)	SD
														A7	14160	24646	0.574535			0.0001	0.588353	0.0131772
														A8	14951	24886	0.60078			1e-05	0.601408	0.0138805
														A9	14638	24821	0.589743			1e-06	0.773175	0.0181521
														B7	15201	25942	0.585961			2e-07	1.16353	0.0156635
														B8	15338	25028	0.612834			4e-08	2.10471	0.0953156
														B9	15496	25595	0.605431			8e-09	3.4817	0.117314
														C7	18486	24213	0.763474			8e-10	4.0453	0.0810128
														C8	18387	24132	0.761934			8e-11	4.31592	0.110642
														C9	18761	23625	0.794116
														D7	23850	20809	1.14614
														D8	24725	21170	1.16793
														D9	24860	21130	1.17653
														E7	34269	15505	2.21019
														E8	32462	15613	2.07916
														E9	33360	16476	2.02476
														F7	40164	11528	3.48404
														F8	40051	11132	3.59783
														F9	40231	11962	3.36323
														G7	41605	10476	3.97146
														G8	41960	10155	4.13195
														G9	41974	10409	4.03247
														H7	43255	10228	4.22908
														H8	43706	10216	4.27819
														H9	44436	10007	4.44049
[truncated: 152 more columns]

## Sheet: GTP
Titration of NADP-Snifit with NADP+ and a fixed concentration of 1 mM GTP
Wavel. (nm)	540	541	542	543	544	545	546	547	548	549	550	551	552	553	554	555	556	557	558	559	560	561	562	563	564	565	566	567	568	569	570	571	572	573	574	575	576	577	578	579	580	581	582	583	584	585	586	587	588
A4	3958	3732	3241	2941	2998	2659	2819	2889	3055	3404	3482	3786	4050	4563	4939	5162	5556	6433	6724	7318	7861	8166	9193	9273	10142	10682	11549	11750	12303	12644	12993	13547	14192	13635	14056	14757	14928	15012	14722	14276	14937	14182	13937	14048	13784	13345	12953	12997	12193
A5	5249	3679	3111	3079	2613	2675	2823	2720	3209	3200	3406	3878	4008	4727	4571	5198	5744	6332	6552	7476	7835	8588	9113	9485	10446	10740	11284	11576	12221	13110	13169	13694	13831	14654	14013	15033	14648	15150	14390	15050	14442	14067	14570	14088	14099	13148	12906	12758	12077
A6	5538	3779	3047	2998	2860	2869	2674	2957	2848	3349	3533	3887	4346	4642	4965	5555	5738	6369	6669	7323	8128	8526	9035	9758	10233	10831	10984	11672	12257	13440	13442	13882	14287	14146	14291	14362	14759	14835	14648	14841	14281	14430	14449	13922	14034	13518	13049	13083	12108
B4	5698	3726	3371	3035	2982	2932	2810	3066	3172	3765	3584	3977	4548	4926	4872	5607	6236	6663	7009	8047	8372	8768	9451	10236	10859	11269	12222	12362	13254	13369	14330	14625	14848	15313	15448	15795	15506	15696	16414	16045	15357	15463	15491	15405	15127	14503	14226	13828	13462
B5	5137	3813	3467	2991	2821	2931	2918	3020	3141	3467	3772	4010	4330	4704	5218	5626	5704	6428	7224	7693	8496	9117	9309	10515	10652	11092	11839	12439	12682	13038	14052	14251	15096	14987	14748	15708	15400	15633	15394	16093	15211	14955	14857	15390	14864	14189	13634	13685	13403
B6	5192	3920	3351	3260	2829	3083	2767	2952	3256	3877	3660	4220	4369	4677	5491	5470	6275	6785	7103	7853	8492	8903	9230	9685	10842	11370	12035	12501	13435	13495	13759	14300	14572	14986	15132	15422	16156	15755	15885	15752	15242	15479	15451	15243	14750	14156	14050	13953	13076
C4	5354	3954	3552	3066	2897	3101	3152	3502	3540	3928	4267	4548	4920	5497	5845	6346	7076	7795	8397	9040	9797	10338	11134	11844	12740	13430	13739	15038	15452	16573	16949	17168	17820	18044	18357	18437	18353	19221	18416	18840	18943	18325	18291	18621	17540	18069	17077	16142	16407
C5	5596	3936	3394	3003	3016	2962	3281	3309	3423	3838	4285	4464	5062	5492	5797	6599	7106	7570	8220	9107	9600	9990	11217	11735	12417	13368	13750	14844	15094	16020	16585	16831	17298	17293	18319	18256	18295	18678	18489	18664	18055	17999	18032	17562	17491	17093	16648	15881	15811
C6	6016	4090	3428	3215	3104	2945	3282	3271	3449	3855	4338	4730	4783	5355	5810	6386	7010	7803	8391	9038	9591	10311	10994	11585	12300	13147	13471	14566	15381	15428	16188	16526	17364	17698	18040	18366	18019	18751	18591	18612	18247	18603	18228	17566	16991	16966	16670	16490	15358
D4	5605	4373	3953	3704	3603	3642	3645	3773	4274	4667	4789	5651	5842	6770	7351	8078	8912	9215	10081	11282	12040	13041	14750	15140	16172	17203	17930	18664	19342	20330	21124	22176	22021	23348	23222	24231	23981	24093	24051	24436	23677	23840	23508	23331	23024	22748	21305	20566	20884
D5	5769	4280	4093	3762	3622	3434	3758	4041	4337	4594	4837	5331	5976	6480	7620	8071	8949	8972	10571	11202	11857	13082	14278	15427	15751	16822	18820	19300	20331	21018	21141	21951	22669	22644	24095	24429	23219	24697	24352	24438	23971	23953	24493	23740	23171	22863	22201	20767	20759
D6	5693	4231	3893	3726	3478	3529	3821	4113	4097	4547	5336	5767	6216	7179	7116	7825	8601	9330	10047	11473	12471	13007	13864	14947	15767	16855	17935	18941	19414	20504	21073	22005	22544	22959	23205	23775	23691	24311	24032	24150	24320	23871	23241	22878	22532	21633	21903	21228	20402
E4	5966	4656	4101	3992	4075	4044	4425	5074	5304	5838	6640	7469	7889	9021	9496	10721	11938	12559	13633	14978	16214	17198	19536	20373	21381	23590	24319	25820	27123	28204	29077	30810	31038	31900	32837	33700	33637	33473	34062	34252	33038	33325	32947	32787	32209	31704	31517	29981	29440
E5	6190	4709	4491	4250	4020	4341	4839	4893	5336	6208	6838	7438	8091	8583	9510	10910	12007	12605	14020	15093	16351	17990	18864	20143	22073	23186	24207	25323	26744	27760	28830	30693	31514	31043	32626	32331	33681	34403	34244	33853	33032	32728	32613	32469	31775	31968	30602	29992	28612
E6	5641	4649	4282	4128	4193	4104	4600	4850	5410	5781	6505	7093	7946	8762	9745	10362	11190	12697	14044	15110	16621	17098	19083	20222	21861	22456	24259	25406	26902	27233	28724	29836	30663	30784	32137	31822	32986	33129	33013	33576	32919	33508	32389	32209	31524	30571	30173	29364	28689
F4	6678	5036	4627	4649	4599	5001	5500	5709	6040	7032	7498	8451	9218	10228	11577	12243	13823	14763	16634	17312	18637	20780	22856	23814	25512	27253	27924	30391	31517	33063	33326	35521	36704	37441	38866	38449	39502	39151	40002	39770	39354	39426	39098	38071	37540	37540	36488	35397	34810
F5	6333	4977	4760	4442	4627	4695	5297	5904	6017	6662	7424	8592	9060	10301	11170	12578	13985	15000	16390	18163	19459	20820	23286	24004	25882	26992	28596	30142	31719	33029	34316	36405	36688	38330	38075	39474	39896	40652	40472	40394	40119	40178	39063	38100	38010	36404	36371	35726	34187
F6	6139	5191	4661	4499	4845	4974	5092	5845	6228	6975	7605	8432	9541	10503	11254	12591	13713	14619	16318	17620	18996	20918	22448	23612	25742	27427	28539	29209	31741	32854	33929	35899	35938	36735	37528	38849	38764	39673	39298	39736	39679	39334	38284	38957	37540	36803	37143	35267	33776
G4	6526	5027	4772	4889	4785	5142	5623	5978	6803	7540	7738	9312	10320	11498	11869	13575	14761	15600	17597	19496	20260	22708	23797	26366	27635	29384	30822	33263	34251	35208	37554	38697	39686	41496	41568	42070	42371	43788	44136	44036	43156	42527	42711	41892	41074	40492	39760	37964	37669
G5	6897	4969	4953	4657	4810	5203	5741	6084	6292	7096	8065	9020	9887	11107	11407	12691	14811	15405	17126	17928	20171	22136	23715	25154	26937	28947	29885	32137	33641	35438	36265	38254	38325	39666	39923	41668	41576	41534	42050	41895	42167	42143	41457	39988	39339	39346	38033	37519	36433
G6	6711	5199	5022	4681	4812	5188	5515	6191	6305	7379	8140	9246	9582	11244	11897	13416	14460	15808	17551	18490	20011	21880	23445	24993	27053	28298	30475	32181	34246	34393	37276	38576	38085	39575	41247	41479	41778	42569	41955	42376	42162	41300	41061	40628	39472	39779	38714	37433	35763
H4	6606	5414	4875	5049	5103	5309	6000	6359	6998	7552	8823	9456	10608	11918	12783	13888	15438	16423	18970	20521	21813	23751	25479	26984	29525	30915	32339	34716	36525	37404	39108	40623	41262	42228	42448	43383	44630	45284	44419	46130	44799	45460	44162	44309	42650	42194	40292	39442	38910
H5	6742	4988	4776	4976	5297	5218	5498	6134	6690	7444	8390	9345	10056	10993	12143	13733	15174	15961	17868	19668	20485	22418	24894	26050	27835	29802	30805	33380	34555	35976	37689	38817	39420	40938	41770	42209	42642	43579	43390	43621	43384	43391	43131	41977	41026	40656	39612	38794	37207
H6	6371	5098	4786	4923	4697	5033	5412	6084	6510	7369	8386	9123	10023	11002	12148	12917	14488	15420	17490	19185	20007	21750	23492	25185	27249	28672	29730	32239	33441	34439	35957	37546	37923	39661	40752	40650	41108	41772	42342	42292	42061	41663	40981	40096	39278	38780	38163	36858	35630
															TMR int.	SiR int.	Ratio (TMR/SIR)			[NADP+] (M)	Mean Ratio (TMR/SIR)	SD
														A4	15012	25376	0.591583			0.0001	0.590662	0.00111982
														A5	15150	25635	0.590989			1e-05	0.611019	0.00641603
														A6	14835	25169	0.589416			1e-06	0.805416	0.0155352
														B4	15696	25975	0.604273			2e-07	1.21231	0.0258218
														B5	15633	25555	0.611739			4e-08	2.19518	0.0558713
														B6	15755	25533	0.617045			8e-09	3.39606	0.118037
														C4	19221	23710	0.810671			8e-10	4.05835	0.0992684
														C5	18678	23705	0.787935			8e-11	4.13513	0.201093
														C6	18751	22933	0.817643
														D4	24093	19888	1.21143
														D5	24697	19940	1.23857
														D6	24311	20482	1.18694
														E4	33473	15710	2.13068
														E5	34403	15438	2.22846
														E6	33129	14880	2.22641
														F4	39151	11988	3.26585
														F5	40652	11628	3.49604
														F6	39673	11579	3.42629
														G4	43788	10667	4.105
														G5	41534	10530	3.94435
														G6	42569	10318	4.1257
														H4	45284	10430	4.34171
														H5	43579	10568	4.12368
														H6	41772	10602	3.94001
[truncated: 152 more columns]

## Sheet: NMN
Titration of NADP-Snifit with NADP+ and a fixed concentration of 100 uM nicotinamide mononucleotide
Wavel. (nm)	540	541	542	543	544	545	546	547	548	549	550	551	552	553	554	555	556	557	558	559	560	561	562	563	564	565	566	567	568	569	570	571	572	573	574	575	576	577	578	579	580	581	582	583	584	585	586	587	588
A4	5287	3726	3568	3030	2833	2911	2837	2967	3288	3371	3563	4307	4470	4887	5225	5733	5997	7052	7176	7861	8131	8882	9382	10543	10848	11266	12181	12855	12967	13812	13873	14383	14687	15148	15591	15087	15383	16083	15530	15535	15601	15719	15431	15229	15026	14196	14205	14234	13186
A5	5469	3774	3452	2986	2809	2882	2894	3113	3257	3515	3715	4134	4372	4836	5185	5512	5786	7083	7025	7613	8350	8827	9468	10327	10857	11102	11820	12556	12924	13005	13623	14201	14511	14303	15277	15069	15842	15248	15168	14935	15105	14936	14795	14979	14355	14382	13622	13404	13121
A6	5704	4002	3283	3125	2819	2854	2832	3410	3118	3643	3661	3853	4528	4724	4958	5675	6199	6777	6960	7838	8579	8802	9782	9979	10853	11282	11957	12649	12665	13494	13871	14703	15073	14983	15096	15709	15592	15462	15481	15697	15186	15497	15296	14811	14758	14661	13951	13385	13239
B4	5506	3620	3357	3192	3078	2868	3225	3107	3263	3528	4079	4416	4680	5179	5377	6040	6709	7376	7699	8492	8822	9606	10248	10562	11509	11662	12660	13063	14040	14789	14912	15162	15572	16485	16991	16300	16614	16528	16890	16686	16564	16780	15955	16318	15585	15276	14877	14301	14241
B5	5420	3903	3493	3029	2933	3102	3224	3269	3231	3812	4089	4402	5237	5549	5779	6304	6531	7221	7788	8505	9105	9723	10636	10736	11558	12566	13038	13727	14351	15058	15500	15844	15838	16318	17066	17304	17117	17534	17299	16853	16751	17059	17248	16525	16090	15523	15140	14675	14572
B6	5402	3826	3548	3196	2944	3024	3163	3262	3602	3772	3928	4441	4756	5083	5460	6205	6667	7104	7762	8542	9072	9417	10675	10750	11774	12117	12414	13425	14006	14472	15518	15504	15575	16243	16073	16822	16348	16701	16532	16433	16568	16359	15589	16137	15532	14995	14728	14584	14065
C4	5401	4119	3674	3377	3233	3127	3668	3340	4028	4147	4609	4909	5433	5572	6167	6825	7711	8021	9223	9615	10758	11086	12309	12684	13400	14637	15362	16238	16331	17549	18557	18480	18798	18863	19812	19406	20013	20233	20342	20348	19672	19851	19924	19640	19136	18428	17687	18479	16914
C5	5635	4130	3644	3375	3295	3315	3622	3499	3913	4068	4432	5043	5470	5963	6481	7119	8007	8220	9086	9422	10805	11224	12300	12762	13701	14626	15123	15711	16516	17339	17803	18524	18902	19037	19795	19633	20213	20390	20156	19712	19709	19073	19396	19451	18581	18274	17869	17919	17017
C6	5505	4112	3796	3330	3099	3276	3551	3726	4013	4077	4181	5117	5360	5952	6618	6675	7614	8102	8978	9650	10144	10467	11967	12457	13519	14428	14689	15768	16337	16937	17466	18392	18550	19054	18745	19815	19920	20022	19696	19667	19160	19248	18848	18840	18228	17970	17352	16840	16417
D4	5723	4261	4072	3734	3809	3684	4029	4266	4533	5094	5268	5848	6437	7462	7809	8156	9179	9961	11027	11933	12866	13945	15349	16220	17123	18476	19290	19890	21298	22103	22777	22807	23217	25158	24243	25568	25743	25303	25956	26375	25628	25232	25019	24747	24399	23615	22983	22346	21229
D5	6312	4262	3878	3733	3776	3890	3915	4306	4909	5026	5454	6058	6811	7326	8205	8762	9790	10402	11013	12149	13203	14211	15434	15939	17126	18241	19456	20461	21765	22259	22799	23611	24427	24976	25836	25713	26589	26654	25840	26260	26338	25987	25300	25533	24822	24082	23751	23071	22222
D6	5909	4474	4039	3765	3814	3554	4099	4412	4751	4987	5302	5974	6602	7250	7642	8740	9646	9895	11043	11738	12949	13732	14974	16325	17572	18384	19319	20098	20963	21910	22900	23244	23924	24298	25380	25517	26050	26077	25614	25717	25390	24714	25184	24927	24343	23708	23572	23278	22317
E4	6306	4692	4742	4452	4225	4533	4793	5481	5657	6262	6937	7876	8340	9409	10070	11297	12156	13324	14636	16186	17646	18853	20586	21768	23284	24524	25558	27314	28354	29575	30433	32049	33186	34156	34041	33966	35201	35140	35761	34964	35531	35616	35290	34900	33626	32871	31861	31244	30780
E5	6141	4858	4772	4299	4293	4652	5180	5439	5958	6347	7159	7919	8554	9420	10448	11623	12627	13566	14636	16583	18575	18830	20987	22276	23804	24989	26754	27612	28918	30404	32169	32275	33539	34337	35063	36380	35592	35893	35971	36737	36450	35744	34879	35345	34558	33722	33359	31173	31253
E6	6219	4655	4330	4348	4375	4569	4784	5192	5880	6175	6955	7899	8625	9332	10089	11695	12901	13434	14597	16178	17711	18425	20067	21425	23362	24587	25617	26942	28529	30085	31823	32393	32963	34027	34815	35523	35395	35217	36097	35426	35885	35683	35175	34321	33044	33228	32219	31260	29840
F4	7311	5275	5135	4834	4933	5310	5260	6104	6534	7533	8160	9276	9857	11431	12148	13369	14822	16280	17421	19524	20771	22435	24109	25433	27411	29237	30880	32031	33874	36042	36802	39139	39516	39930	40491	42077	42463	42464	42680	43014	42547	41976	41769	42192	40825	40607	37982	38060	37485
F5	6634	5383	5109	4810	5316	5144	5924	6559	6918	7584	8380	9366	9940	11011	12185	13574	15385	16181	17589	19042	21538	22541	24814	25452	27970	29438	31004	32633	33309	35367	38032	39019	39467	40047	41593	41918	42327	42509	43159	43707	43297	41110	41945	40377	40293	40036	39088	38388	37952
F6	6318	5101	4819	4845	4783	5005	5558	6034	6432	7053	8186	8755	9726	11040	11995	12869	14346	15381	17645	18434	21014	22035	23632	25704	26386	28168	30112	31766	33353	34743	35596	37524	38121	38528	40254	40514	40217	41217	41466	41523	41823	41318	39941	40564	38924	38897	38040	36902	35637
G4	6454	5774	5190	4965	5289	5462	5903	6937	7003	8178	8856	9637	10602	12130	12975	14213	15705	17307	18578	20861	22516	23610	25781	27254	29018	31899	32362	34593	36541	39079	39149	41158	42482	42558	43739	43935	44657	44779	45969	45598	45500	45300	45208	44027	43181	42147	41800	40065	39561
G5	6694	5527	5179	4881	5264	5457	6251	6734	6946	8048	8772	9768	10446	12005	12680	14492	15707	17308	18459	20116	22668	23594	25016	27199	29517	31804	32555	33989	36747	37584	39403	40522	41892	43543	44008	43949	44911	45838	45271	46396	45864	44809	45288	44414	43568	42424	41008	40285	39004
G6	6621	5338	5136	5064	5179	5385	5697	6487	6846	7914	8459	9769	10683	12156	12783	14495	16177	16626	18153	20286	22378	23588	25543	27056	28698	31693	33068	34508	35648	37925	38951	40465	41546	43211	43680	44501	45688	45122	44948	45305	45166	44412	44252	43068	43486	41273	41086	39828	38924
H4	6570	5089	5140	5225	5719	5705	5875	6225	6854	8265	8882	9638	10410	11541	12690	14196	15472	17023	18166	21491	22248	23989	25598	27905	29626	31748	32302	34600	36060	37952	38566	40161	41044	42810	44359	44121	44672	45847	44999	44828	43898	44561	44720	43401	43149	42067	41193	40228	37994
H5	6702	5261	5272	4983	5343	5320	6063	6562	7456	8126	8792	10133	10778	11673	12925	14786	15975	16900	18550	20513	22122	24353	26246	27074	28997	31576	32764	34750	36759	37944	39863	41471	41852	43332	43958	44980	45485	45877	45885	45027	45703	45225	44161	44315	43468	42498	41095	40450	39069
H6	6991	5369	5355	5025	5169	5156	5803	6420	7041	8474	8711	9638	10500	11863	12878	14191	15972	17231	19054	20501	22611	24047	25653	27435	29495	31095	32260	34234	36393	38267	40037	41280	41251	43152	43821	44366	44386	44817	45579	45545	45916	45604	44296	43642	42954	42499	41752	41158	39275
															TMR int.	SiR int.	Ratio (TMR/SIR)			[NADP+] (M)	Mean Ratio (TMR/SIR)	SD
														A4	16083	26976	0.596197			0.0001	0.593196	0.0219807
														A5	15248	26757	0.56987			1e-05	0.623929	0.012443
														A6	15462	25202	0.613523			1e-06	0.809344	0.0191852
														B4	16528	26792	0.616901			2e-07	1.21249	0.0303645
														B5	17534	27470	0.638296			4e-08	2.27523	0.0291438
														B6	16701	27086	0.616592			8e-09	3.56496	0.00616735
														C4	20233	25696	0.787399			8e-10	4.29131	0.131704
														C5	20390	24777	0.822941			8e-11	4.35049	0.149308
														C6	20022	24486	0.817692
														D4	25303	21487	1.1776
														D5	26654	21619	1.2329
														D6	26077	21253	1.22698
														E4	35140	15402	2.28152
														E5	35893	15999	2.24345
														E6	35217	15307	2.30071
														F4	42464	11888	3.57201
														F5	42509	11933	3.56231
														F6	41217	11576	3.56056
														G4	44779	10632	4.21172
														G5	45838	10865	4.21887
														G6	45122	10155	4.44333
														H4	45847	10728	4.27358
														H5	45877	10144	4.52257
														H6	44817	10532	4.25532
[truncated: 152 more columns]

## Sheet: nicotinamide
Titration of NADP-Snifit with NADP+ and a fixed concentration of 100 uM nicotinamide
Wavel. (nm)	540	541	542	543	544	545	546	547	548	549	550	551	552	553	554	555	556	557	558	559	560	561	562	563	564	565	566	567	568	569	570	571	572	573	574	575	576	577	578	579	580	581	582	583	584	585	586	587	588
A7	5427	3730	3366	2916	3000	2742	3069	3222	3395	3419	3732	4213	4614	4947	5260	5843	6077	6718	7219	7510	8781	8874	9730	10145	10966	11309	11787	12415	13632	13758	14239	14105	14427	14890	14872	15555	15586	15569	15200	15478	15322	15441	14800	14800	14717	14017	13925	13340	13381
A8	5331	3891	3498	3102	3026	3111	2911	3253	3260	3681	4008	4480	4555	4906	5177	6059	6326	7031	7461	8015	8756	9052	9730	10580	11136	11821	12416	12760	13234	14181	14251	14572	15282	15320	15399	15812	16007	16049	16382	15725	16355	15751	15528	15694	14948	14531	14342	14254	13462
A9	5847	3936	3429	3245	3071	2785	2888	3051	3166	3514	3843	4322	4468	4983	5195	5734	6322	6686	7454	8244	8277	9277	10243	10492	10950	11478	12249	12712	12959	13894	14275	14594	15087	15299	15421	16404	15787	15532	15958	15937	15617	15911	15175	15295	15171	14655	13746	13785	13808
B7	5229	3773	3349	3180	3035	2754	3059	3263	3405	3753	3902	4394	4543	5187	5629	5800	6740	7078	7701	8127	9235	9628	10039	10626	11255	12329	13168	12876	14022	14383	15140	15149	15356	16057	15809	16081	16443	16900	16949	16881	16674	15811	15436	15361	15135	15241	14480	14691	13460
B8	5490	4132	3169	3165	3233	3092	3140	3308	3531	3645	4116	4347	4771	5381	5416	6136	6514	7027	7600	8152	9245	9509	10384	10264	11502	11966	12758	13147	13503	14732	14692	15242	15659	16074	16461	16201	16548	16425	16969	16667	16442	16632	16130	15594	15563	15087	14642	14730	14100
B9	5207	3757	3338	3095	3051	2850	2885	3023	3620	3592	3793	4202	4655	4994	5224	6110	6551	6921	7458	7977	8809	9515	10245	9900	11552	11834	12507	12940	13279	13785	14658	14581	15175	15557	15218	16244	16535	16212	15963	16180	15491	16270	15651	15655	14645	14696	14428	13821	13448
C7	5616	4021	3465	3403	3458	3386	3374	3569	3601	3934	4306	4885	5228	5835	6207	7066	7626	7871	8542	9110	10018	10449	11136	12202	12812	13543	14475	15193	15549	15896	16515	17586	18024	17798	18296	18318	19210	19151	19417	19078	19221	19065	18245	18208	18269	17396	16560	16269	15957
C8	5863	4193	3683	3265	3339	3210	3420	3545	3878	4062	4419	4903	5416	5702	6371	6685	7211	7827	8777	9415	10156	11088	11611	12144	12814	13928	14602	14890	15582	16354	17021	17888	18110	18483	18658	18851	19057	19529	18892	18805	19615	18524	18736	18169	17304	17391	16897	16349	15887
C9	5347	3939	3726	3262	3114	2898	3069	3466	3672	3889	3888	4711	5296	5337	6006	6445	7150	7933	8278	9380	10297	10156	11208	12020	13010	13451	14243	15064	15392	16139	16303	16938	17078	18213	18341	18539	18731	18271	18674	18723	19035	18680	18175	18062	17633	16757	15983	16135	16180
D7	5751	4391	4063	3509	3487	3212	3690	3821	4497	4394	5437	5812	5940	6751	7363	8145	9242	9486	10348	11529	11869	13373	13678	15146	15654	17037	17573	18836	20030	20383	21142	22315	22585	22550	22975	23463	23864	23673	23883	23717	23855	24303	23353	22886	22427	22127	20904	21248	20448
D8	6269	4334	3851	3657	3439	3719	3934	4235	4136	4931	5466	5553	6279	7065	7690	8381	9116	9566	10557	11558	12611	13594	14163	15325	16374	17045	17782	19321	20477	20999	21574	22001	22100	23629	23843	24325	24411	24490	24862	24576	24697	23575	24070	23751	22757	23144	21738	21914	21249
D9	5956	4070	3854	3430	3376	3329	3684	3901	4251	4528	4966	5435	5909	6844	6901	7691	9063	9255	10485	10971	12265	12616	13423	14061	15487	16479	18055	18065	19272	19808	20104	20867	21075	22150	22037	22796	22851	23134	23149	23284	23028	22661	23222	22200	22408	21487	20758	20129	20011
E7	6733	4771	4329	4471	4317	4646	4806	5344	5728	6046	6657	7590	8359	8876	9543	11022	12135	13042	13979	15724	16978	18095	20043	21376	22399	23526	24942	26795	27413	28764	29356	30748	31026	32750	33131	33637	33822	34272	34396	34603	34666	33495	33617	32901	33323	31882	31597	30737	29668
E8	6219	4727	4591	4289	4494	4408	4832	5074	5382	6233	6811	7561	8097	9265	9926	10903	12482	12653	14300	15920	17085	18026	19705	21177	22275	23407	25438	26525	27170	29412	29775	31046	32128	31919	33445	33737	33764	35027	34293	34873	33979	34027	34499	32988	32313	32017	30971	30460	29904
E9	6133	4820	4119	4136	4161	4484	4898	4939	5606	5762	6639	7199	7917	8980	9484	10532	11654	12586	14176	15065	16860	17837	18744	20216	21560	22869	24184	26217	26371	28017	29271	29623	30730	31133	32039	32826	33227	33724	32979	33238	33241	32217	32618	31532	31407	30759	30493	29838	28747
F7	6116	5066	4657	4638	4837	5066	5612	6197	6772	7457	7800	8965	9489	10729	11967	13433	14826	15878	16907	18725	20764	21562	24194	25778	27298	28013	30066	32118	32996	35010	35980	38143	39094	38696	40529	40666	42345	41788	43345	42885	41561	41269	41600	40261	39830	38705	38209	37253	36403
F8	6395	5317	4772	4711	4904	5069	5482	5917	6457	7458	8189	9099	9634	10603	12001	12793	14030	15624	16767	18631	20850	21555	23291	25112	27281	28852	29791	31721	33706	34631	36128	37518	38323	38852	40693	40916	40878	41574	42124	41286	40949	40866	40467	39756	39486	38183	37739	36287	35960
F9	6443	5008	4968	4625	4773	4841	5160	5614	6527	7253	7655	8952	9602	10358	11227	12391	13895	15346	16447	18195	19679	20631	22767	24170	25887	27733	29008	30767	32520	33400	34747	35127	37020	37412	38596	39713	40159	40640	40315	39773	39638	39154	39487	38743	37828	36486	36697	35405	34425
G7	6296	5211	5112	4833	5063	5361	5629	6393	6882	8030	8489	9630	10418	11499	12601	13799	15173	16316	17995	20109	20525	23105	24862	26585	28069	30111	32152	33778	34922	36389	37748	39756	40907	41981	42142	43694	44243	44410	44132	44894	43895	43809	43689	42361	41108	40882	40294	39861	37664
G8	6897	5419	4986	4882	5208	5535	5721	6506	7184	7752	8368	9458	10318	12130	12478	14218	15825	16779	18112	20019	21747	23297	25430	27055	28349	30389	31951	34629	35993	37127	38235	39551	40335	41688	43076	44166	44112	43600	44351	44374	44311	43995	43409	42732	42437	42133	40963	39606	37866
G9	6554	5307	5003	4955	5065	5122	5560	6400	6851	7700	8283	9398	10141	11413	12041	13618	15087	16379	18347	19740	21786	22484	24955	26232	27569	29359	30891	32533	33875	36490	38333	39611	40425	39809	41592	43300	43271	43001	43309	43575	43172	43452	42807	41377	41046	40677	39524	38378	37194
H7	6496	5469	5151	5133	4911	5485	5917	6443	7061	7976	8648	9601	10187	11690	12704	14042	15508	16733	18665	20054	22227	23908	25605	26881	29248	30551	32205	34353	35404	36895	38829	40626	40869	42357	43052	43241	43953	44308	43946	45644	44521	44243	44581	43026	42510	41809	41356	39309	37737
H8	6260	5300	5130	4999	5249	5448	5961	6668	7172	7915	8453	9421	10732	11876	12641	14727	15589	16587	18687	20514	21815	23463	25358	27483	29162	30764	32030	33791	36062	37614	38989	40319	41123	41841	42343	43935	44252	45378	44551	44142	45276	44599	44316	43118	43705	41500	40425	39208	38805
H9	6757	5442	5066	4914	5142	5351	5701	6215	6741	7685	8739	9353	10345	11507	12546	13994	15562	16596	18425	20260	21328	23097	25081	26771	28482	29858	31391	32969	35335	36712	38069	40073	40037	42288	42795	43543	43266	43663	44332	44005	44757	43845	42830	42500	41909	41329	39067	39765	37897
															TMR int.	SiR int.	Ratio (TMR/SIR)			[NADP+] (M)	Mean Ratio (TMR/SIR)	SD
														A7	15569	26691	0.583305			0.0001	0.567763	0.0135835
														A8	16049	28566	0.561822			1e-05	0.605674	0.0170401
														A9	15532	27827	0.558163			1e-06	0.760576	0.0198569
														B7	16900	27178	0.621826			2e-07	1.07408	0.0233224
														B8	16425	27940	0.587867			4e-08	2.13933	0.0374587
														B9	16212	26694	0.607327			8e-09	3.50447	0.106971
														C7	19151	25319	0.756388			8e-10	4.20849	0.0761955
														C8	19529	24967	0.782192			8e-11	4.28171	0.126456
														C9	18271	24586	0.743147
														D7	23673	22416	1.05608
														D8	24490	22255	1.10043
														D9	23134	21707	1.06574
														E7	34272	16319	2.10013
														E8	35027	16344	2.14311
														E9	33724	15507	2.17476
														F7	41788	11562	3.61425
														F8	41574	11883	3.49861
														F9	40640	11951	3.40055
														G7	44410	10711	4.1462
														G8	43600	10155	4.29345
														G9	43001	10273	4.18583
														H7	44308	10404	4.25875
														H8	45378	10271	4.41807
														H9	43663	10475	4.16831
[truncated: 152 more columns]

## Sheet: NAD
Titration of NADP-Snifit with NADP+ and a fixed concentration of 100 uM NAD+
Wavel. (nm)	540	541	542	543	544	545	546	547	548	549	550	551	552	553	554	555	556	557	558	559	560	561	562	563	564	565	566	567	568	569	570	571	572	573	574	575	576	577	578	579	580	581	582	583	584	585	586	587	588
A10	5206	3678	3501	2987	2956	2942	2997	2917	3412	3517	3800	4313	4574	4762	5079	5512	5992	6696	7384	7954	8458	9444	9811	9998	10642	11306	11897	12481	12310	13241	13550	14798	14789	15562	15384	15725	15476	15905	15545	15370	15333	15108	14990	14864	14925	14123	13898	13361	12773
A11	5209	3930	3294	2904	2940	2881	2828	3060	3370	3550	3543	4175	4713	4935	5215	5901	6074	6664	7482	7539	8615	8708	9814	10419	10613	11869	12162	12630	13286	13462	13624	14047	14867	15299	15216	15621	15409	16013	15881	15424	15426	15101	15281	14973	14748	14826	14093	13506	12843
A12	5598	3785	3320	3155	2908	2641	2926	2959	3154	3328	3773	3750	4242	4621	4787	5613	6084	6290	6871	7528	7951	8510	8884	9606	10020	10727	11370	11811	12643	12608	12869	13699	13816	14027	14402	14133	14500	14284	14362	14813	14661	14390	14044	14386	13343	13069	13136	12502	12151
B10	5693	3587	3314	3013	3028	3096	2941	3120	3334	3653	3975	4215	4685	5219	5329	6154	6278	6875	7774	8023	9224	9428	10263	10618	11335	12020	12398	13154	13769	14244	14719	14845	15294	15179	16180	16118	16226	17025	16330	16281	16187	15950	15793	16057	15063	14810	14429	14365	13744
B11	5478	3854	3254	3106	2948	2995	3167	3079	3364	3624	3828	4143	4761	4763	5440	5991	6508	7126	7595	8504	8969	8960	10080	10587	11105	12059	12792	13403	13823	14403	14905	15305	15530	15644	16157	15962	16437	16239	16105	16467	16383	15938	15735	15675	15239	14400	14310	14088	13506
B12	5248	3571	3455	3168	2744	2992	3013	3116	3364	3544	3932	4073	4872	5235	5295	6064	6642	7097	7607	8493	8598	9458	10114	10746	11325	11827	12567	13222	13309	14145	14170	14991	15319	15220	15946	15652	16137	16240	16305	15539	16131	16190	15399	15476	15049	14558	13915	13971	13699
C10	5335	3844	3631	3319	3135	3103	3261	3349	3482	3975	4131	4655	5173	5640	5953	6597	7179	7713	8370	8750	9848	10830	11333	11593	12612	13700	13780	15243	14890	15950	16562	16976	17538	17633	18175	17809	18549	18810	18199	18455	18228	17902	17969	17813	17409	17035	16736	16333	15411
C11	5754	4170	3475	3351	3222	3023	3111	3486	3447	3735	4237	4794	5119	5810	6093	6655	7112	7542	8399	9172	10104	10375	11632	12399	12375	13338	14153	14632	15977	16241	16423	16924	17129	17760	18318	18636	18633	19480	18869	18649	18080	18445	17429	17625	17474	16726	16909	16517	15603
C12	5540	3918	3442	3261	3067	3081	3226	3533	3507	3697	4391	4430	5076	5285	5962	6418	7351	7829	8121	9367	9793	10087	10768	11383	12615	13483	14089	14089	15118	15805	16462	16936	17448	17892	17895	17752	18061	18247	18693	18815	17853	17683	17575	17370	17471	16607	16227	16078	15368
D10	5565	4166	3890	3674	3281	3499	3619	3945	4168	4395	4789	5453	5798	6525	7233	8022	8351	8730	9874	10860	11900	12309	13548	14234	15146	16307	17295	17854	18756	19320	20302	21306	21412	21934	21571	22768	22817	22960	22849	22813	22840	22660	22090	22703	21370	21507	20996	20652	19737
D11	5720	4302	3755	3677	3381	3653	3732	3931	4344	4619	5176	5976	6319	6893	7298	8265	8948	9473	10317	11112	12241	12997	14491	15192	15894	17199	17884	19147	19234	20790	21465	21819	22375	23367	22699	23244	23968	23926	24302	23500	24032	23541	23452	23205	22578	21859	21496	21105	20390
D12	5330	4236	3808	3542	3387	3395	3597	3886	4146	4421	5001	5695	5701	6778	7281	8056	8782	9323	10434	11361	12416	13026	13528	14733	15376	16513	17440	18264	18740	19907	20280	21280	21624	22354	22294	23296	23724	23558	23406	23386	22765	22828	22660	22177	22004	21450	20347	19921	19731
E10	6265	5028	4383	4119	4183	4093	4625	5020	5379	5977	6714	7434	8055	9062	9328	10767	11597	13218	13752	15353	16622	17512	19290	19880	21485	23079	23322	25508	26311	28116	28136	30126	30526	31379	32195	32042	33299	33306	33229	32582	32949	33115	31903	32101	31279	30307	30013	29550	28162
E11	5763	4684	4395	4442	4275	4289	4607	5346	5700	6001	6989	7460	8600	9157	9964	10609	12058	12659	14457	15419	16904	18358	19639	20311	22534	23541	24492	26087	27113	28964	29327	30346	31007	31442	31979	33053	33837	33383	33081	33321	33289	32904	33194	32310	31947	31295	30563	29754	28269
E12	6156	4759	4666	4358	4051	4356	4705	5033	5583	5837	6641	7398	7935	9181	9360	10385	11485	12895	13965	15002	16760	17614	19367	19665	21773	23022	24845	26278	26808	27362	29070	29751	31091	31137	32020	32751	32093	33327	33486	33440	33186	32409	31887	32327	32034	30848	30031	29102	28024
F10	6449	4997	4727	4260	4930	4806	5238	5836	6212	7358	7384	8407	9513	10498	11262	13033	13779	15038	16433	18089	19800	21237	23260	24064	26271	28655	29256	30339	32460	33532	34745	36294	37774	37621	38958	39190	39891	40168	40157	40656	40339	40570	39298	39681	38232	37249	36947	35873	34512
F11	6267	5152	5089	4504	4751	5125	5350	6274	6617	7074	8115	8882	9211	10912	11928	12653	14551	15563	16815	18770	19883	21560	22816	25308	26494	28450	29742	31642	32144	35391	35074	36622	37084	39113	39259	40061	41158	41213	41481	41329	41740	40569	40326	40264	39088	38038	37467	36028	35686
F12	6429	5157	4718	4741	4665	4951	5292	6211	6140	6880	7583	8393	9420	10710	11567	12686	14315	14981	16897	18308	19465	21244	22930	24202	26380	28172	28996	30918	32335	33804	35355	36825	35957	38704	38940	38984	40432	40035	40429	40276	40757	39975	39797	39550	38792	37209	37569	35715	34465
G10	6414	5290	4884	4899	5038	5270	5367	6191	6756	7756	8195	9840	10267	11339	12055	13547	15400	16048	17958	19262	21539	22765	24483	26514	27574	29891	31192	33537	34409	36283	37784	38932	39200	40923	40853	41884	42859	44043	43532	42696	42497	42828	42821	41410	40403	39686	39612	38208	37152
G11	6299	5328	4931	4905	5128	5119	5737	6363	6644	7723	8586	9220	10331	11679	12488	14013	15393	16473	18069	19929	21921	23452	24920	26681	28624	29872	31641	33650	35308	36607	37620	39719	40612	41825	42013	43443	43846	44342	44543	43971	43479	42788	43118	42348	41190	41110	40494	38569	37637
G12	6473	4883	5017	4897	5117	5101	5869	6094	6590	7576	8495	9221	10223	11122	11945	13064	14786	15530	17556	19141	20901	22088	24411	25588	27359	29166	30629	32052	34060	35303	36238	38555	38660	39517	41282	41640	42611	41381	42928	42882	42251	42686	41238	42397	40395	40003	37737	36957	36471
H10	6436	5447	5447	5145	5257	5380	5803	6430	6903	8050	8638	9244	10534	11672	13004	14078	15704	16588	18432	20128	22620	23683	25767	26909	28876	31490	32799	34523	35752	37919	38388	40804	40388	42742	43190	44896	44659	44865	44544	44641	43989	43086	44232	43393	41841	41795	40630	39560	38818
H11	6953	5100	5112	5061	5337	5461	5760	6456	6866	7976	8233	9794	10518	11654	12588	14107	15938	16485	18373	20120	21834	22989	25492	27495	29323	30691	31093	33452	35038	37970	38870	40159	39563	41822	43381	43766	43340	44249	44491	44320	43743	44402	43823	43304	41954	41615	39722	39088	38587
H12	6670	5097	4925	4574	5047	5499	5693	6247	6493	7632	8117	9415	10372	11199	12200	13586	15273	15935	18104	19639	20750	22869	24288	25844	27899	29480	30827	32629	34935	36092	36981	37966	39366	40515	41328	42433	42600	42990	43416	42822	42880	42665	43362	41029	40372	39914	39602	37705	38155
															TMR int.	SiR int.	Ratio (TMR/SIR)			[NADP+] (M)	Mean Ratio (TMR/SIR)	SD
														A10	15905	26602	0.597887			0.0001	0.581065	0.0326748
														A11	16013	26604	0.601902			1e-05	0.612195	0.0105281
														A12	14284	26286	0.543407			1e-06	0.747044	0.0173272
														B10	17025	27487	0.619384			2e-07	1.06985	0.0116099
														B11	16239	27060	0.600111			4e-08	2.0116	0.0333364
														B12	16240	26317	0.617092			8e-09	3.31287	0.113053
														C10	18810	25867	0.727181			8e-10	3.98523	0.0741837
														C11	19480	25805	0.754892			8e-11	4.0253	0.0562272
														C12	18247	24039	0.759058
														D10	22960	21340	1.07591
														D11	23926	22212	1.07717
														D12	23558	22299	1.05646
														E10	33306	16624	2.00349
														E11	33383	16834	1.98307
														E12	33327	16271	2.04825
														F10	40168	12075	3.32654
														F11	41213	12056	3.41846
														F12	40035	12536	3.1936
														G10	44043	10844	4.06151
														G11	44342	11331	3.91334
														G12	41381	10395	3.98086
														H10	44865	10972	4.08904
														H11	44249	11051	4.00407
														H12	42990	10794	3.98277
[truncated: 152 more columns]

## Sheet: NADH
Titration of NADP-Snifit with NADP+ and a fixed concentration of 100 uM NADH
Wavel. (nm)	540	541	542	543	544	545	546	547	548	549	550	551	552	553	554	555	556	557	558	559	560	561	562	563	564	565	566	567	568	569	570	571	572	573	574	575	576	577	578	579	580	581	582	583	584	585	586	587	588
A1	4438	3902	3025	2843	2498	2695	2759	2838	3071	3181	3591	3716	4132	4274	4910	5106	5376	6036	6868	7675	7492	8071	8858	9412	9999	10544	11231	11435	11779	12532	12942	13066	13628	13626	13986	14020	14048	14053	14009	14390	14192	13630	13297	13422	13537	12600	12649	12375	12069
A2	5299	3759	3211	2926	3044	2763	2857	2868	3253	3326	3500	4040	4175	4514	4975	5315	5760	6504	6668	6847	7670	8489	8805	9122	10013	11125	11182	11684	11858	12489	13002	13367	13385	13779	13778	14587	14666	14887	14637	14947	14678	14253	14546	13878	13835	13542	13009	12863	12333
A3	5301	3631	3156	2806	2676	2695	2837	2949	2955	3370	3867	4124	3833	4578	4698	5326	5951	6598	6725	7584	7780	8089	8879	9551	9900	10738	11514	11758	12630	12592	12764	13291	13244	13758	14153	14207	14791	14328	14911	14610	14108	14834	14534	13827	13444	13412	12445	12791	11765
B1	5357	3555	3384	3021	3066	2902	2997	3153	3079	3710	3573	4294	4767	4973	5385	5590	6353	6700	7282	8174	8508	9040	9615	10604	11262	11489	12103	12922	13657	14051	13864	14679	14954	15551	15599	16330	15630	15893	16091	15757	15896	15269	15791	15233	14763	13864	14485	14236	13180
B2	5658	3869	3188	2971	2798	2959	3019	2936	3165	3477	4111	4199	4522	4799	5242	5956	6319	6850	7709	7660	8652	9190	10005	10221	11015	11634	11926	12397	13499	13764	14312	14671	14332	15577	15866	15717	15751	16172	16028	15914	16022	15842	15728	15087	15579	14568	14863	13443	13749
B3	5181	3675	3559	3026	3018	3044	2918	2935	3232	3680	3800	4105	4390	4951	5160	5822	6089	6709	7273	7948	8761	8768	9708	10226	10967	11548	12091	12621	13464	13541	14330	15063	14316	15472	15228	15720	15464	15999	16191	15943	16010	15681	15495	15350	14799	14415	14004	13769	13680
C1	5586	3769	3387	3261	3149	3246	3220	3474	3588	3948	4100	4451	4844	5619	5937	6598	7350	7747	8541	9321	10550	10588	11247	11598	12552	13795	13880	15018	15589	16153	16692	17032	17660	18176	18219	18337	18972	19079	18849	18667	19017	17699	18905	17957	17819	17015	16871	16753	15805
C2	5387	3868	3683	3032	3284	3220	3438	3401	3793	3873	4136	4957	5244	5440	5984	6639	7079	7645	8345	9334	10014	11300	11363	11944	13213	14201	14072	15036	16084	16476	17051	17835	17551	18207	18324	18975	19193	18426	19495	19409	18517	18350	18304	18293	18472	17615	16738	16398	16266
C3	5504	3721	3484	3356	3194	3140	3244	3377	3317	4010	4618	4504	5345	5839	5915	6561	7219	7840	8718	9046	9992	10814	11605	12363	12886	13620	13838	15042	15999	16433	16832	17292	17089	18478	18775	18817	19442	19230	19081	18862	18572	18481	18586	18481	17741	17358	17034	16695	16156
D1	5580	4178	3710	3538	3542	3765	3659	4039	4292	4562	5046	5828	6335	6882	7248	8614	9113	9258	10292	12072	12467	13628	14389	15333	16909	17296	17801	19215	19882	21777	21234	22390	22806	24034	23962	24344	24333	24490	24389	24127	24272	24047	24130	23257	22880	22583	22532	21594	21094
D2	5552	3912	3996	3565	3361	3637	3885	4121	4323	4357	5222	5818	6387	6909	7383	8306	8703	9642	10387	11645	12470	13499	14432	15453	16300	17765	17459	19330	20657	20751	21191	22510	23035	23189	23634	24221	24540	24416	24336	24876	24515	24013	23994	23750	23360	22877	22422	21749	20859
D3	5717	4122	3900	3852	3564	3497	3687	3770	4207	4620	5152	5491	6295	6843	7274	8105	9205	9425	10364	11289	12172	12744	13970	15509	16715	17279	17871	19129	20331	20091	21123	22034	21904	23150	23954	23650	24288	24526	24629	24133	23910	23660	23787	23330	23254	22731	22019	20895	20928
E1	6218	4494	4583	4156	4124	4345	4765	5156	5313	6109	6585	6954	7938	9117	9927	11019	11763	12911	13668	15887	16954	17823	19358	21052	22394	23537	24722	25572	27343	28871	28880	30365	31494	31940	32719	32869	33432	32885	33483	34290	33340	33498	32994	32679	31903	31542	31382	29544	28590
E2	6038	4638	4254	4178	4199	4385	4694	5185	5453	5703	6508	7454	8098	9102	10089	11037	11658	12378	14054	15030	17096	18099	18702	20773	21869	23657	24249	25327	26963	28909	29952	30038	31054	31389	32901	32940	33311	34400	33699	33627	33874	33333	33002	33163	31866	31757	30923	29757	28529
E3	5801	4790	4252	3960	4211	4548	4579	5004	5391	6096	6628	7103	8074	8901	9608	10662	11590	12780	14138	15912	17019	18223	19310	20484	21858	23516	24853	25947	27988	28439	29042	30155	30937	32707	31939	32853	33247	33546	33800	33802	34219	33614	32614	32479	32123	32158	31360	30480	29165
F1	6106	5140	4762	4393	4718	5088	5323	6006	6335	7284	7568	8707	9073	10687	11370	12764	13961	15321	16519	18535	20531	20866	22986	24313	25770	27783	29474	31231	32399	34387	35017	35822	37044	38751	38467	39584	39268	39914	39443	40167	40584	40428	39551	38548	38649	37467	36167	36493	33939
F2	6391	4946	4462	4580	4608	4913	5170	6107	6183	6869	7990	8599	9352	10582	11386	12792	14375	14907	16559	17993	19908	21187	22479	24597	25738	27957	28892	31360	32078	32976	34847	35340	36728	38297	38586	39354	40264	39716	40635	39699	41141	39729	40196	39112	38320	37136	37516	35757	34864
F3	6609	5007	4642	4689	4996	5059	5095	5892	6117	6925	7942	8732	9766	10763	11488	12462	14059	15355	16892	17935	19692	20994	22671	24479	25862	28091	28958	30800	32952	33615	35500	35724	36466	38155	38565	38949	40030	40317	40701	41130	40717	40203	39900	39284	38341	37363	36951	35921	33876
G1	6446	5230	4768	4733	5015	5073	5376	6130	6689	7467	8048	9111	9640	11224	12323	13187	14955	16237	18056	19480	21120	22206	24225	25705	27548	29401	30426	32177	34355	36076	36748	38225	38447	40336	42803	41560	41901	42517	42818	42721	42777	42262	41083	42193	40778	39574	39042	37746	36802
G2	6375	5188	4839	4804	4922	5345	5535	6238	6898	7096	8081	9217	10059	11240	12510	13134	15102	16309	17667	19409	20932	22998	24289	25939	27167	28700	31043	33389	34404	36549	37549	38048	39289	40129	40525	42496	42208	42705	43533	43004	43370	42095	42149	41805	41889	40666	39524	38631	36660
G3	6785	5536	4989	5051	4853	5376	6026	6279	7135	7483	8382	9400	10267	11379	12156	13910	15261	16353	17609	19904	21988	22397	25456	26976	27842	30774	31692	33349	35991	36439	37507	38992	39804	40560	41703	42682	43059	42400	43723	43608	43417	43095	42406	42614	41322	40257	39455	39067	37252
H1	6571	5176	4804	4767	5198	5253	5820	6131	6977	7405	7953	8808	9674	11366	12288	13401	15562	15569	17831	19675	21424	22639	24802	26055	28077	29317	31307	32172	34755	36132	37343	39319	39447	39805	40987	41959	42135	42899	42532	42643	42951	41646	42962	41644	40903	39488	38580	38107	36327
H2	6131	5171	4721	4829	4914	5114	5262	6143	6604	7458	8108	9205	9794	11041	11809	13035	14958	15595	17152	18402	20094	22117	23630	25333	27330	29252	30772	31712	33326	35202	35813	37816	38965	39337	40522	41329	42009	42064	41950	41855	41500	42801	40830	40652	39721	38779	37773	37009	35911
H3	6761	5037	5110	4869	4982	5142	5618	6342	6501	7655	8145	9474	9965	11447	12298	13705	15442	16697	17975	19529	21121	22702	24933	25324	27526	29884	31463	33195	35621	36647	37434	39393	40539	40911	42292	42766	42775	43240	43817	43775	43587	43557	42670	42278	41840	40372	38992	38623	37547
															TMR int.	SiR int.	Ratio (TMR/SIR)			[NADP+] (M)	Mean Ratio (TMR/SIR)	SD
														A1	14053	24549	0.572447			0.0001	0.576696	0.0134563
														A2	14887	25157	0.591764			1e-05	0.614178	0.0100916
														A3	14328	25320	0.565877			1e-06	0.798137	0.00980434
														B1	15893	26222	0.606094			2e-07	1.17719	0.026181
														B2	16172	25855	0.625488			4e-08	2.1816	0.0908272
														B3	15999	26187	0.610952			8e-09	3.3392	0.0746598
														C1	19079	23602	0.808364			8e-10	3.87491	0.120057
														C2	18426	23359	0.788818			8e-11	4.24683	0.0790138
														C3	19230	24121	0.797231
														D1	24490	20458	1.19709
														D2	24416	21277	1.14753
														D3	24526	20663	1.18695
														E1	32885	15817	2.07909
														E2	34400	15275	2.25205
														E3	33546	15154	2.21367
														F1	39914	11926	3.34681
														F2	39716	12179	3.26102
														F3	40317	11824	3.40976
														G1	42517	10770	3.94773
														G2	42705	10837	3.94067
														G3	42400	11348	3.73634
														H1	42899	10093	4.25037
														H2	42064	9728	4.32401
														H3	43240	10379	4.1661
[truncated: 152 more columns]

## Sheet: Sepiapterin
Titration of NADP-Snifit with NADP+ and a fixed concentration of 100 uM sepiapterin
Wavel. (nm)	540	541	542	543	544	545	546	547	548	549	550	551	552	553	554	555	556	557	558	559	560	561	562	563	564	565	566	567	568	569	570	571	572	573	574	575	576	577	578	579	580	581	582	583	584	585	586	587	588
A10	7135	5689	5180	4994	4889	4555	4481	4514	5263	5280	5453	5793	5774	6366	6653	7261	7588	7833	8595	8990	9429	10315	10495	11073	11904	12273	12833	13213	13696	14715	14787	14659	14869	15324	15737	15995	15962	16221	16091	16239	15581	15772	15109	14738	15130	14487	14017	13818	13181
A11	7066	5435	4924	4736	4560	4845	4836	4624	4850	5063	5176	5472	5972	6241	6505	7130	7610	7636	8434	8571	9371	10238	10608	11121	11053	12407	12361	13372	14028	14320	14360	14236	15248	15064	15371	15643	15686	15295	15987	15238	15193	15773	14963	14844	14706	14263	13783	14469	12958
A12	6794	5454	5109	4695	4363	4458	4906	4584	4935	4856	5164	5602	5969	6056	6677	6777	6957	7673	8415	9010	9410	9542	10305	11042	11125	11906	12511	13216	13395	13886	14197	14434	14418	15443	15225	15592	15310	15882	15446	15658	15267	15323	15032	14901	14531	14095	13829	13654	13235
B10	7247	5372	5219	4943	4761	4974	4605	4706	4979	5202	5602	5615	5881	6506	7098	7321	7580	8531	8621	9190	10133	10442	10858	11825	11686	12752	13510	13483	14404	14695	15406	15731	15721	16716	16350	16456	16705	16853	16221	16331	16486	16381	16366	15415	15297	15070	14829	14645	14144
B11	7582	5493	5141	4762	4642	4381	4817	4563	4947	5144	5342	5512	6020	6234	6737	7189	7745	8041	8580	9302	9162	10186	10832	10906	12011	12455	12697	13211	14118	14752	14928	14834	15348	15961	16103	16268	16168	15660	16334	15973	16291	15781	15769	15855	15059	14963	14102	14015	13620
B12	7178	5651	5211	4908	4931	4927	4725	5006	5237	5257	5612	5595	6131	6545	6904	7234	7715	8090	8791	9479	9967	10569	11078	11741	12364	13055	13443	13619	13975	15154	15390	15452	15531	16118	16625	16498	16903	16963	17207	16050	17013	16661	16505	15774	15402	15414	14501	14210	14008
C10	6930	5896	5260	5044	5242	4966	4745	5049	5187	5725	6015	6113	6637	7261	7650	7963	8521	9051	9962	10416	11070	12220	12609	12992	13575	15088	15085	16015	16786	17266	17454	18031	17912	18920	18654	19167	19250	19448	19031	19245	18982	19296	18825	18339	17933	17295	17383	16901	17048
C11	7072	5620	5233	4958	4567	4836	4899	5323	5217	5529	5816	6189	6496	7142	7315	8296	7867	8867	9892	10175	10842	11231	12812	13101	13799	14340	14881	15127	16425	17116	16870	17888	17993	18191	18840	18478	18814	19064	19312	18428	17885	18275	18189	17980	17881	17364	16925	16654	15839
C12	7153	6236	5793	4768	5019	5063	4960	5221	5379	5863	6056	6111	6660	7005	7692	8345	8603	9350	10025	10618	11295	11996	12409	13017	14247	14523	15169	15734	16756	17128	17939	18478	18482	18939	18820	19841	19795	19296	19778	19618	19375	19477	18810	18491	18548	18003	17566	17227	16618
D10	7369	5916	5909	5245	5207	5237	5379	5505	5984	6577	6589	7096	7425	8125	8247	9497	10202	10567	11628	12925	13121	13739	15008	15889	16915	17742	17902	19658	20169	21184	21775	22148	22318	22894	23000	23972	23347	24097	24805	24081	23971	23871	23694	22999	22415	22333	22444	21488	20892
D11	7424	5644	5317	5170	5029	5373	5174	5665	6114	6297	6497	7036	7598	7672	8746	9226	10211	10733	11551	12126	13482	14376	14873	15911	17106	17449	18087	19546	20049	20087	21515	21734	22503	23196	23394	23865	23557	24306	23555	24315	23586	23400	23649	22824	23161	21711	21668	21056	20820
D12	7518	5790	5457	5582	5277	5348	5556	5733	6089	6274	7184	7429	7879	8722	8831	9801	10491	10813	11880	12691	13710	14417	15375	16186	17871	17789	19349	19956	21038	21592	22347	22644	22938	23546	23967	24417	24302	24646	24344	24817	24614	24494	24029	23468	23034	22663	22102	21172	20942
E10	7433	6611	6358	5711	5781	5753	5999	6745	6745	7543	7800	8734	9368	10104	10883	11638	12789	13460	14454	15793	17031	18401	20003	21301	22588	23576	24657	25939	27205	27872	29006	30287	30556	31710	32438	33027	32609	33047	32584	34124	32684	32953	31778	31824	31262	30844	31018	29583	28182
E11	7536	6406	5875	5847	5818	5834	6130	6283	6693	7198	8168	8939	9236	9788	10567	11545	12736	13684	15018	16084	16976	18179	19615	20645	22063	23181	24391	25525	26584	27919	28692	30890	31085	31218	31097	32296	32875	32596	32095	32955	32984	32477	32461	31533	31122	30412	29453	28990	28200
E12	8415	6354	5982	6026	5950	6192	6471	7028	6993	7764	8102	8915	9847	10513	11371	12234	13225	14028	15106	16914	17428	19203	20818	20993	22927	24250	25308	26667	27736	28731	29559	31261	32112	32671	33708	33619	33007	33787	34759	34591	33815	33753	33318	33164	31661	31048	31475	29987	28960
F10	7990	6769	6680	6334	6432	6625	7298	7639	8197	8761	9091	10680	11209	12528	12572	14601	15483	16227	18195	19797	21811	22433	24294	25770	27662	29831	31259	31830	33995	35239	35942	37782	38569	39926	40276	40497	40647	41572	42119	41593	41978	41238	40242	39874	38791	38172	38235	36959	35428
F11	7934	6562	6366	6166	6387	6753	6887	7424	7710	8562	9369	10095	11116	11792	13050	13992	15916	16256	17889	19229	20872	22853	23676	24858	26759	28170	30059	31996	32751	33829	35204	37098	37361	38338	39437	39539	40253	40731	41228	41208	40634	40518	40551	40231	38935	38357	37210	36659	35217
F12	8303	6985	6736	6361	6658	6661	7064	7806	7906	8680	9137	10453	11142	12285	13228	14233	15381	16644	17752	19246	20903	22366	24509	26204	27696	29182	30659	32406	33318	35085	36753	37552	38478	39306	40768	40343	41215	41455	41380	41684	41298	41792	40543	40533	39308	38675	38228	36001	35938
G10	8633	6965	6544	6380	6659	6667	7193	7961	8050	8739	9615	10365	11511	12649	13362	14605	15942	17171	19153	20921	22365	22987	25117	26722	28650	30129	31946	33229	34744	36560	38350	38986	39879	40358	41961	42246	42918	43752	43847	43373	43662	43309	42338	41282	41263	40423	39440	38679	36882
G11	7920	6590	6517	6274	6582	6705	7407	7886	8342	8778	9792	10167	11381	12470	13365	14545	16176	17007	18486	20550	21940	22947	25186	26697	28292	30045	30924	33142	35200	36018	37637	38942	39222	40189	41362	42336	42458	42163	43053	43234	42005	42447	43116	41892	40458	40213	39374	37751	36738
G12	8034	6804	6401	6430	6575	6987	7176	7688	8474	9106	9257	10636	11456	12522	13426	14292	16377	16764	18734	19992	21893	23422	25230	26798	28349	29934	31514	32688	34952	35920	37780	38000	39424	41583	41060	42369	43168	42852	42647	42867	42008	43139	42213	41356	40380	39484	39293	38039	36706
H10	8296	6888	6597	6898	6788	6999	7348	8086	8630	9417	9831	11102	12277	13114	13788	15452	16666	18260	19473	21521	22567	23958	26185	27751	29397	31444	32725	34891	36760	38028	38969	40058	41731	42042	43652	44019	44169	45315	44585	44752	44939	44451	44255	43082	42896	41509	41213	39536	38262
H11	7956	6774	6813	6582	6626	6976	7526	8038	8342	9066	9755	10699	11574	12976	13501	14731	16392	17741	18919	20479	22955	24024	25861	27810	28926	31165	31922	34225	35922	38151	38138	40173	41211	41314	43109	43217	43498	43687	43534	43834	43826	43995	43790	41950	41322	41467	40360	39175	38177
H12	8973	7269	6718	6602	6598	7209	7445	8148	8482	9620	10259	10979	11795	12534	14243	15086	16606	17910	19447	20944	23040	24444	26224	28040	29952	31842	32463	35194	36926	38101	39092	40724	41573	42665	42603	44277	44061	45354	44965	45294	44595	44332	43879	42847	41853	41604	40745	39576	38167
															TMR int.	SiR int.	Ratio (TMR/SIR)			[NADP+] (M)	Mean Ratio (TMR/SIR)	SD
														A10	16221	25870	0.62702			0.0001	0.615031	0.0215497
														A11	15295	25917	0.590153			1e-05	0.631855	0.0131401
														A12	15882	25293	0.627921			1e-06	0.789299	0.00644197
														B10	16853	26772	0.629501			2e-07	1.14176	0.0120183
														B11	15660	25256	0.620051			4e-08	2.01541	0.00561936
														B12	16963	26258	0.646013			8e-09	3.30499	0.0508306
														C10	19448	24434	0.79594			8e-10	3.99328	0.0517924
														C11	19064	24345	0.783077			8e-11	4.16812	0.0333493
														C12	19296	24460	0.78888
														D10	24097	21245	1.13424
														D11	24306	21407	1.13542
														D12	24646	21327	1.15562
														E10	33047	16349	2.02135
														E11	32596	16179	2.01471
														E12	33787	16808	2.01017
														F10	41572	12382	3.35745
														F11	40731	12337	3.30153
														F12	41455	12732	3.25597
														G10	43752	10795	4.05299
														G11	42163	10630	3.96642
														G12	42852	10820	3.96044
														H10	45315	10840	4.18035
														H11	43687	10577	4.13038
														H12	45354	10815	4.19362
[truncated: 152 more columns]
