# Supplementary material for: Semisynthetic biosensors for mapping cellular concentrations of nicotinamide adenine dinucleotides
Source: eLife. 2018 May 29;7:e32638. doi: 10.7554/eLife.32638 (PMC5990361; doi:10.7554/eLife.32638)
Supplement: Figure 2—source data 6. [file elife-32638-fig2-data6.xlsx]

## Sheet: Figure_2f
	Std labeling		0.2 eq. CP-TMR-SMX
[NADP+] (M)	Ratio (TMR/SiR)	SD	Ratio (TMR/SiR)	SD
0.001	0.533564	0.0147685	0.522629	0.0284283
1e-05	0.628042	0.017059	0.611027	0.00871831
2e-06	0.812242	0.0186116	0.759492	0.0404137
4e-07	1.16118	0.0385955	1.22262	0.02212
8e-08	2.07208	0.027568	2.24251	0.0457176
1.6e-08	3.22016	0.0686848	3.3313	0.081696
3.2e-09	3.79725	0.149152	4.16794	0.765219
6.4e-10	4.06411	0.090724	4.01469	0.266971
1.28e-10	4.1236	0.108037	3.56837	0.634599

## Sheet: Standard Labeling
Titration of NADP-Snifit with NADP+ (from 10 uM NADP+, 5-fold serial dilution), NADP-Snifit was labeled with 2 eq. CP-TMR-SMX
Wavel. (nm)	540	541	542	543	544	545	546	547	548	549	550	551	552	553	554	555	556	557	558	559	560	561	562	563	564	565	566	567	568	569	570	571	572	573	574	575	576	577	578	579	580	581	582	583	584	585	586	587	588
A1	1644	1678	1699	1880	1742	2097	2240	2332	2743	3062	3296	3648	3953	4265	4725	5283	5731	6141	6587	7136	7853	8693	9755	9918	10163	11305	11569	12653	12669	12878	13947	13925	14280	14474	14985	15130	14995	15055	15074	15102	15189	15069	14254	14817	14176	14116	13626	13022	12797
A2	2094	1946	1765	1938	2192	2217	2593	2641	3119	3491	3898	3734	4434	5270	5254	5496	6378	6812	7407	8312	8764	9868	10117	10282	11423	11718	12868	13009	13956	14037	15229	15106	15432	15834	15707	16502	16276	16456	17132	16398	16715	16139	15901	15391	15573	15269	14752	14428	14290
A3	2004	1844	1755	1956	1991	2135	2465	2787	2817	3412	3653	3730	4097	4947	5128	5582	6406	6636	7169	8021	8554	9003	9853	10683	11463	11892	11895	13370	13898	13722	14289	14912	15718	15574	15251	16063	16368	16586	16415	16868	15889	16272	16173	15749	15523	15039	14716	14170	13474
B1	2027	1996	2268	2119	2449	2565	2769	3156	3492	3970	4334	4496	5236	5703	6098	7106	7005	8135	8951	9687	10686	11344	12440	12965	14290	14797	15608	16370	17393	17553	18260	19125	19847	20311	20173	21541	20386	21072	20740	20953	20210	20800	20764	19462	19570	18724	19385	18615	18041
B2	2026	1904	1820	2111	2399	2211	2667	2855	3322	3535	3871	4420	4969	5157	5940	6404	6744	7449	8706	8790	9906	10147	10611	11938	12975	13451	14299	14514	15438	16686	17059	17156	17766	17823	18576	18705	18589	19580	19645	19547	19452	18440	19027	18356	17989	17783	16767	17177	16737
B3	1920	2100	2098	2206	2398	2680	2833	3163	3440	3540	4210	4754	5053	5656	6066	6885	7199	7970	8708	9493	10788	11031	12304	13212	13828	14380	15421	15915	16622	17475	17664	18323	18985	19690	20298	20200	21075	21275	21480	20962	20304	20179	19738	20396	19001	18550	18364	17656	18172
C1	2308	2067	2458	2425	2866	2911	3276	3753	3842	4401	5368	5710	5679	6512	7270	8054	8796	9675	11109	12258	12697	13877	15240	16256	16586	17095	18751	20116	20762	21714	22598	24270	24493	24310	24978	25758	24364	25049	24232	24824	24244	24836	24889	24784	24315	23932	23927	22732	21833
C2	2307	2275	2460	2526	2798	2850	3328	3638	3767	4700	4765	5470	5969	6442	7582	7812	8397	10283	10917	11492	12607	13398	14577	15133	16351	17856	18741	19353	20265	21175	21751	22501	24117	23542	24653	24616	24664	25014	25317	25819	24956	25343	24813	24898	23898	23073	23102	22093	22073
C3	2326	2112	2446	2642	2936	3267	3405	3739	4399	4838	5124	5998	6453	6708	7279	8728	9168	10416	10750	12209	13011	14906	14591	16255	17530	18135	19847	20436	21433	22692	24223	24408	24994	25668	25112	25167	26454	26511	26949	26345	27088	25982	26302	24592	24867	24625	24195	23597	22639
D1	2718	2737	2816	2745	3213	3401	4184	4837	4971	5979	6274	7296	8064	8519	9146	10413	11339	13491	14471	15695	16472	17722	20058	20618	22235	24704	24862	25806	28235	28735	30248	31313	31991	32283	33084	34383	34290	34938	35402	34439	34756	35052	33727	32548	32959	33198	31286	31121	30193
D2	2580	2403	2522	2830	3130	3331	3840	4077	4652	5037	5691	6383	6954	7387	8676	9764	10191	11253	12455	13888	15034	16966	17356	17693	20149	19847	22370	23163	24458	25414	27620	27847	28973	28155	29153	30884	30090	30451	31390	30964	30675	30737	30565	30251	28237	28964	27489	28149	26704
D3	2955	2666	2850	3084	3424	3584	4244	4719	5219	5941	6274	7279	7970	8995	9867	10580	12045	12630	14375	15612	17181	18510	20097	21325	23788	23971	24931	27640	28904	30120	31443	31958	33862	33897	34710	34426	35869	35347	36214	36582	35302	35604	34951	34321	33732	32651	32983	32626	30669
E1	3075	3118	3186	3635	4035	4456	4850	5300	5408	6735	6993	8293	9249	10011	11462	12685	13640	15166	16770	18152	19752	21043	22923	24055	26909	27670	30226	31285	33554	34606	35094	36875	38185	38861	39669	40870	41055	41030	40638	40473	41805	40970	41010	39986	39674	38452	37960	35928	36138
E2	2728	2760	3011	3044	3919	3621	4577	4954	5561	5852	6305	7365	8314	9200	10029	11157	12777	13672	14988	16888	17623	19809	20385	22691	23527	25589	27066	28739	29379	30600	32443	33368	33839	35297	36000	36851	36774	37364	37855	36631	36904	38230	36449	35315	34775	34318	33781	33076	31552
E3	2901	3161	3247	3323	3879	4570	4863	5453	5860	6772	7470	8339	9112	10018	11119	12821	13528	15478	17109	18353	19949	23067	23177	24923	26772	27179	29841	32219	32827	34243	36238	36365	39342	39642	40666	42212	41646	41136	40953	41350	42579	42611	40785	42134	40414	39878	38425	37276	36710
F1	2923	3314	3444	3456	4031	4527	4841	5742	6255	6606	7800	8649	9893	10346	11660	13569	14214	15670	17472	18725	20820	22709	23742	26324	27409	28954	30597	32001	33850	35547	36689	38415	40000	40034	42159	42365	42657	43223	42510	43113	43382	42691	41347	41626	40672	40578	40417	38285	37322
F2	2773	2966	2630	3386	3630	3973	4261	4856	5589	5958	6700	7479	8258	9332	10075	11355	12691	13639	15136	16428	17756	19254	20825	22930	24547	25626	27033	28330	30689	31017	33073	34171	35600	35519	36595	37654	37178	36537	37522	38118	37620	37033	37885	36059	36057	35875	34148	33583	32643
F3	2914	3224	3297	3533	3725	4116	4872	5332	5801	6733	7651	8458	9712	10856	11509	13034	14295	15114	17044	18571	20250	21550	23957	25478	27875	28486	30397	32450	33994	35070	37013	37838	38483	39561	41541	41510	42116	42443	42677	42029	42831	42227	42063	42193	41053	39707	39520	38712	37113
G1	2795	2985	3178	3468	3677	4319	4838	5389	6056	7080	7736	9035	9526	9982	11159	12446	14219	16045	17361	18275	20829	22063	23518	25527	27125	28538	30942	32198	34567	35326	36902	37849	38995	39657	39970	41352	41508	42223	42941	43471	41832	43114	42505	40781	40804	39353	38842	37485	36283
G2	2813	2804	2968	3395	3808	4369	4322	5136	5558	6372	6798	8138	9178	9405	11328	11053	12581	14157	15264	17294	18608	19955	21034	23327	25134	26111	28387	29888	30001	32171	33762	34387	36308	36905	37548	38281	38790	38468	38575	39521	38329	39212	38927	38397	37109	35955	35772	35035	32958
G3	3006	2923	3291	3701	3954	4328	4623	5355	5972	6876	6952	8086	9534	10001	11389	13104	13842	15196	17250	17839	19870	21852	23405	24763	27369	28463	30175	30991	33450	35042	35199	36470	38918	38000	40034	40039	40607	42509	41426	41749	41763	42050	41181	41707	39523	39297	37465	37540	35675
H1	2990	2929	3361	3446	3709	4113	5345	5516	6032	6431	7432	8222	9535	10204	11417	12295	14239	15239	16523	18824	20109	21294	23615	25032	27060	28519	30376	31448	33302	34682	35469	37518	38635	40254	40068	40907	41418	42192	41730	42949	41782	41988	41116	40951	39931	40040	38669	38194	35770
H2	2877	2818	3013	3132	3552	4003	4485	4667	5130	6116	6742	7774	8687	9415	10670	11916	12399	13447	15403	16635	17951	20171	21050	22772	24085	25782	27357	28737	30931	31780	32528	34209	35497	35855	36654	37440	37915	38684	37953	38042	38457	37297	37112	38053	36729	35866	34809	34075	33203
H3	2860	2946	3423	3620	4025	4586	5042	5626	5957	6669	7485	8602	9446	10406	11453	13465	14219	15509	17094	18931	20680	21770	23977	25166	27916	28251	31479	32661	32980	35650	37409	37395	39995	41561	42238	42493	42798	42557	44452	43135	43689	43211	43116	43119	41603	40442	40532	38989	38735
															TMR int.	SiR int.	Ratio (TMR/SIR)			[NADP+] (M)	Mean Ratio (TMR/SIR)	SD
														A1	15055	24727	0.608849			0.001	0.533564	0.0147685
														A2	16456	25964	0.633801			1e-05	0.628042	0.017059
														A3	16586	25856	0.641476			2e-06	0.812242	0.0186116
														B1	21072	26237	0.803141			4e-07	1.16118	0.0385955
														B2	19580	23487	0.833653			8e-08	2.07208	0.027568
														B3	21275	26596	0.799932			1.6e-08	3.22016	0.0686848
														C1	25049	21248	1.17889			3.2e-09	3.79725	0.149152
														C2	25014	21060	1.18775			6.4e-10	4.06411	0.090724
														C3	26511	23736	1.11691			1.28e-10	4.1236	0.108037
														D1	34938	16890	2.06856
														D2	30451	14880	2.04644
														D3	35347	16822	2.10124
														E1	41030	12811	3.20272
														E2	37364	11817	3.16189
														E3	41136	12481	3.29589
														F1	43223	11139	3.88033
														F2	36537	10079	3.62506
														F3	42443	10921	3.88637
														G1	42223	10590	3.98706
														G2	38468	9238	4.1641
														G3	42509	10519	4.04116
														H1	42192	10057	4.19529
														H2	38684	9263	4.17618
														H3	42557	10641	3.99934
														A10	14511	28074	0.516884
														A11	16424	30137	0.544978
														A12	15806	29334	0.538829
Titration of NADP-Snifit with NADP+ (1 mM NADP+), NADP-Snifit was labeled with 2 eq. CP-TMR-SMX
Wavel. (nm)	540	541	542	543	544	545	546	547	548	549	550	551	552	553	554	555	556	557	558	559	560	561	562	563	564	565	566	567	568	569	570	571	572	573	574	575	576	577	578	579	580	581	582	583	584	585	586	587	588
A10	1707	1767	1755	1832	1993	2154	2557	2470	2823	2656	3295	3721	3914	4315	4977	5454	5515	6112	6485	6880	7532	8218	9023	9149	9997	10151	11147	11990	12174	12798	12633	13335	13386	13705	14368	14425	14175	14511	14570	14159	14304	13959	14245	13861	13045	13616	13055	12432	12797
A11	2604	2429	2609	2445	2870	3196	3624	3396	3616	3944	4255	4761	4961	5578	5804	6377	7230	7739	7855	8674	9168	9909	10200	10818	12185	12164	13652	13377	13884	14745	15076	15868	15944	15995	16623	16946	16955	16424	16369	16546	15931	16633	16018	15808	15558	15655	14734	14447	14167
A12	1815	1909	1917	1702	2157	2247	2420	2414	2794	3159	3707	3932	4543	4522	5211	5643	5868	6686	7038	7610	7889	8979	9619	10272	11076	11104	11554	12423	13512	13735	14003	14295	14616	14767	14992	14976	15773	15806	15751	15810	15198	15504	14826	15048	14268	13692	13336	13625	13340
[truncated: 152 more columns]

## Sheet: Incomplete labeling
Titration of NADP-Snifit with NADP+ (from 10 uM NADP+, 5-fold serial dilution), NADP-Snifit was labeled with 0.2 eq. CP-TMR-SMX
Wavel. (nm)	540	541	542	543	544	545	546	547	548	549	550	551	552	553	554	555	556	557	558	559	560	561	562	563	564	565	566	567	568	569	570	571	572	573	574	575	576	577	578	579	580	581	582	583	584	585	586	587	588
A7	2517	2536	2448	2285	2133	2670	2495	2612	3259	3276	4145	3910	4930	5584	5616	5868	6909	6774	7927	8841	9074	9291	10854	10751	10857	11606	12413	13257	13686	13920	14018	14480	15330	15516	15260	15438	15627	15708	15848	15909	15120	15246	15727	15609	15145	14525	13492	13244	13105
A8	2761	2441	2508	2655	2881	2914	3360	3433	3627	3754	4384	4418	4737	5228	5852	5909	6610	7757	7722	8417	8763	9244	10509	11277	11411	12245	12463	13384	13645	15035	15618	15804	15352	16325	15385	16087	16792	16589	16306	17120	16369	16894	15176	15322	15971	14947	14966	13762	13793
A9	2598	2605	2640	2757	2682	2439	2753	2843	3056	3560	3934	3975	3876	4613	5556	6095	5417	6393	7057	7791	8661	9518	9242	10579	10691	10836	11457	13388	13368	13375	13801	14509	14486	14602	14769	15382	14893	15590	16202	14955	15429	15125	15214	14652	14722	14194	13574	14046	12647
B7	2992	2955	2816	2855	2792	3225	3363	3641	4595	4342	4377	5394	6249	6290	6085	7514	8330	8586	9701	10125	10929	12720	12329	12901	13950	14976	14871	16766	16667	17378	18623	19142	19760	19960	20477	20622	20943	20523	19964	20109	19759	20007	20389	19771	18871	19143	18224	17489	17434
B8	3253	2836	2692	2882	2797	3002	2915	3611	3653	3783	4462	4988	4957	6210	6244	5987	7071	8087	8718	9402	10200	11468	11862	11850	12678	13130	15150	14886	15297	15898	17116	17698	17143	18601	17703	18289	19036	18687	18750	18714	17980	19224	19144	17675	17860	16765	16497	15300	15497
B9	3380	2537	2835	3418	3091	3460	3508	3562	3792	4260	4935	5367	5564	6360	6760	8387	8816	8410	9700	10639	11940	11387	13987	12453	14493	15398	15604	16057	17483	18398	18538	20079	19781	20127	21102	20473	21342	21559	21244	19989	20637	21474	20618	19243	19831	19972	19219	18937	18064
C7	3605	3457	3466	3154	3453	3684	4132	4754	5086	5447	5804	6684	7309	8625	9255	9285	10252	11436	12862	13157	14640	15893	16238	16752	18684	20104	21666	20791	22997	23238	24386	24566	25585	26488	27191	27534	27196	29385	27198	27740	26813	27262	26965	26840	25051	25142	23484	23649	23427
C8	3549	3303	2941	3363	3706	3622	3855	3961	5184	5242	5134	6193	6803	8030	7789	8888	10189	10610	12023	12972	13179	14246	14662	16356	18020	18524	20727	20520	22124	22617	23184	24144	24677	25656	25416	27061	26706	26681	26088	27105	26424	26925	25584	25290	24641	25855	23918	23818	22320
C9	3283	3278	3195	3174	3308	3722	4396	4338	4498	5530	5942	6398	7016	8342	9135	9575	10456	11220	12542	13418	14371	15147	15711	17486	18436	19773	20747	22914	22831	25002	24951	26432	26425	28052	26740	26668	27152	28980	29152	28746	27979	28598	27264	26622	26547	25812	25228	25508	25507
D7	3480	3889	3976	4538	4020	4550	5220	5859	6188	6745	6926	7530	9385	10502	11717	12855	13917	14645	16390	18058	18702	20816	21336	23726	26026	26083	28374	29312	31399	32159	33861	34125	35630	37088	37385	37861	38015	38930	38735	39210	37841	37146	38276	38195	36488	36177	35624	33812	32867
D8	4197	3803	4199	3674	4442	4322	5353	5792	6483	7188	6749	8161	9586	10630	10752	12666	13430	14551	15527	19062	18198	20585	22108	22944	25974	27138	28528	29124	32419	32088	33320	36461	34874	37880	36926	38886	37581	37684	39217	37318	37977	38564	37618	36693	37263	35563	35944	32964	32831
D9	4241	3961	3957	4074	4374	4851	4998	5557	5950	6694	7218	8372	9071	9867	10721	13038	13442	14371	16494	18135	19223	19774	21608	22418	25685	26276	26635	30956	31587	32523	33095	34288	35996	36234	36342	37403	37039	37546	38481	37015	37979	36700	35641	36367	34931	35460	34343	33112	32615
E7	3990	4107	4177	4398	5080	5354	6182	6708	6862	7565	8509	9971	10381	11135	12719	13936	15902	17985	18884	20380	22285	24232	24451	27576	29625	30340	32601	33597	35016	36768	38745	39619	39945	41790	43392	43142	43848	44378	45681	45070	43271	42519	44389	41859	41623	40525	40951	40077	38544
E8	3917	3883	4074	4692	4469	5156	5520	6019	6421	7661	8592	8807	10117	11105	12091	14146	15493	15877	17697	20328	20992	22881	24556	25589	26975	30864	30201	32507	34475	35682	38123	39077	40252	40674	39818	41572	43991	42417	42428	42165	42389	42681	41418	41903	40915	39294	39612	36631	36012
E9	4283	3975	4226	4869	4675	5315	5325	6474	7553	7638	7587	10160	11062	11343	12442	14658	15203	16416	18134	20327	21210	22500	24462	26850	28285	28907	31617	32659	34585	35226	36771	38298	40672	42087	41215	42196	43787	43723	43163	43235	42811	43990	40824	41052	41123	41918	38248	37523	36720
F7	4403	3895	3599	4186	4770	5008	5592	6765	7143	7460	8211	9866	10542	11207	12971	14156	16680	16856	18130	20465	22674	23870	25056	26859	29679	30794	34468	34442	35484	37016	41082	40325	40760	42047	42830	43808	44445	45302	45739	46131	44170	44497	44172	42739	42811	42050	41712	40905	38202
F8	6030	6910	7145	7652	8144	8929	10382	11290	12505	13615	14073	16104	18196	19308	21779	24488	26431	27881	31031	34471	34616	39589	41441	44165	47062	49442	52552	53792	56314	57127	58918	60564	60376	61061	62041	61985	61212	62065	62195	62672	61856	62015	62212	60953	62088	60765	58280	56008	56816
F9	4399	3819	3988	4600	4651	4945	5451	6341	7145	7865	8126	9766	10766	11154	12911	13466	15049	16731	18407	20683	21428	23352	25088	27904	29207	30693	32291	34804	35513	38706	38833	39300	40861	41827	41414	42881	44671	44557	44352	43001	44749	44498	43394	42862	42408	41286	40814	38728	36454
G7	3671	3633	4111	4286	4460	5084	5172	6238	6953	7838	8157	9274	10287	11753	12332	13863	15405	17781	18277	20570	21441	23304	25617	26752	28987	30508	32718	34256	35093	36865	38338	39280	40468	43087	41248	42566	43178	45265	44583	44724	43530	43419	43191	42210	41190	40335	40869	39447	37694
G8	4521	4467	3948	4701	4915	5156	5779	7193	7277	8439	9271	10821	11468	12367	13510	14785	16837	17819	20064	21368	23422	25188	27705	28152	30702	32657	34169	36345	36748	39457	38580	42695	43476	43449	43169	44812	45878	46010	46165	45312	45833	44258	44269	44074	43393	42252	41831	40000	38765
G9	4178	4308	3988	3982	5013	5023	5688	6189	6723	7385	8756	9633	10576	10850	12761	13553	15130	16339	17794	20373	22351	23026	24295	26450	27908	29868	31948	32507	34636	36193	38873	40747	39928	41383	42235	43603	42480	42789	44884	42463	43282	42490	41699	41198	41955	39427	39745	39206	38170
H7	3766	3413	3941	3906	4523	4090	4785	5542	6291	7108	8007	7979	9372	9789	11472	12670	14160	15356	15706	17899	20246	20110	21859	22838	26381	26124	28054	28802	32525	32919	33429	35699	35574	37611	38071	37556	37538	38832	38219	38139	37682	38351	37322	37103	37409	36275	34001	35147	34289
H8	3843	3909	4155	4135	4367	5488	5337	6302	6889	7652	8326	9155	9646	11132	12997	14514	15363	16283	18141	19485	21325	22548	25320	27314	27812	29118	30405	33067	33719	35094	38438	37758	39178	41405	41579	42978	44611	42977	43296	43182	41412	42920	40785	40238	41435	40369	39676	38163	37885
H9	3843	3814	3808	4570	4585	4969	5416	6138	7108	7101	9001	9654	9948	11122	13226	14528	15502	16962	17945	19968	21007	23302	24647	25984	28765	29533	31388	32788	34487	36533	39927	39413	40761	42897	42560	42077	43781	41738	42731	42597	44230	43037	41914	41436	41341	40783	38886	38740	38119
															TMR int.	SiR int.	Ratio (TMR/SIR)			[NADP+] (M)	Mean Ratio (TMR/SIR)	SD
														A7	15708	25681	0.611658			0.001	0.522629	0.0284283
														A8	16589	27556	0.60201			1e-05	0.611027	0.00871831
														A9	15590	25169	0.619413			2e-06	0.759492	0.0404137
														B7	20523	26303	0.780253			4e-07	1.22262	0.02212
														B8	18687	26212	0.712918			8e-08	2.24251	0.0457176
														B9	21559	27453	0.785306			1.6e-08	3.3313	0.081696
														C7	29385	23573	1.24655			3.2e-09	4.16794	0.765219
														C8	26681	22180	1.20293			6.4e-10	4.01469	0.266971
														C9	28980	23786	1.21836			1.28e-10	3.56837	0.634599
														D7	38930	17083	2.27887
														D8	37684	16693	2.25747
														D9	37546	17135	2.19119
														E7	44378	13410	3.30932
														E8	42417	13000	3.26285
														E9	43723	12778	3.42174
														F7	45302	12392	3.65575
														F8	62065	12296	5.04758
														F9	44557	11724	3.80049
														G7	45265	10949	4.13417
														G8	46010	10952	4.20106
														G9	42789	11537	3.70885
														H7	38832	13599	2.8555
														H8	42977	10555	4.07172
														H9	41738	11048	3.77788
														C10	6605	13267	0.497852
														C11	7160	12932	0.553665
														C12	6703	12981	0.51637
Titration of NADP-Snifit with NADP+ (1 mM NADP+), NADP-Snifit was labeled with 0.2 eq. CP-TMR-SMX
Wavel. (nm)	540	541	542	543	544	545	546	547	548	549	550	551	552	553	554	555	556	557	558	559	560	561	562	563	564	565	566	567	568	569	570	571	572	573	574	575	576	577	578	579	580	581	582	583	584	585	586	587	588
C10	1367	1136	1161	1111	1104	964	1234	1327	1427	1559	1614	1821	2083	2373	2493	2482	2812	3118	3088	3502	3750	4238	4185	4526	4856	5373	5556	5385	5545	5978	5992	6075	6305	6594	6735	6539	6695	6605	6781	6669	6380	6219	6249	6287	5921	6011	5912	5942	5771
C11	1387	1193	1081	1193	1223	1207	1312	1371	1470	1642	1549	1767	2056	2172	2392	2501	2952	3105	3465	3770	3496	4157	4505	4607	4729	5133	5308	5661	5465	5917	6165	6717	6743	6629	6711	6892	6844	7160	6483	6727	6476	6497	6724	6096	6152	5915	5904	5859	5755
C12	1602	1141	1237	1106	1131	1285	1356	1462	1435	1647	1705	1852	2280	2164	2396	2530	3027	3281	3416	3515	3814	4417	4467	4544	4863	5132	5671	5624	5841	6156	6532	6230	6452	6623	6516	7180	6627	6703	6803	6817	6526	6973	6527	6307	6138	6415	6371	6016	5592
[truncated: 152 more columns]
