# Supplementary material for: Semisynthetic biosensors for mapping cellular concentrations of nicotinamide adenine dinucleotides
Source: eLife. 2018 May 29;7:e32638. doi: 10.7554/eLife.32638 (PMC5990361; doi:10.7554/eLife.32638)
Supplement: Figure 3—source data 1. [file elife-32638-fig3-data1.xlsx]

## Sheet: Figure_3b
Time (min)	Ratio (TMR channel/FRET channel)	SD
0	3.01314	0.306596
0.168233	2.96704	0.318986
0.3349	2.98454	0.298275
0.501817	2.98816	0.289209
0.668233	2.9715	0.288458
0.8349	2.95246	0.29763
1.00182	2.97268	0.292891
1.16848	2.96954	0.315746
1.3349	2.95958	0.304418
1.50157	2.95066	0.301838
1.66823	2.95948	0.297636
1.8349	2.94157	0.283002
2.00157	2.9251	0.273484
2.16823	3.10499	0.299941
2.3349	3.19074	0.289466
2.50182	3.30527	0.276728
2.66823	3.34771	0.288921
2.8349	3.44753	0.286103
3.00182	3.56363	0.316999
3.16823	3.59364	0.302545
3.33515	3.6411	0.280427
3.50182	3.67625	0.264747
3.66848	3.73101	0.297928
3.8349	3.72421	0.278247
4.00182	3.78582	0.278703
4.16848	3.81429	0.304748
4.3349	3.87862	0.329485
4.50157	3.87894	0.293359
4.66848	3.92632	0.30826
4.8349	3.95408	0.312561
5.00157	3.92312	0.30379
5.16848	3.94853	0.276508
5.33515	3.95455	0.289911
5.50157	3.98707	0.302696
5.66848	3.95672	0.298787
5.8349	3.96849	0.301012
6.00182	3.97228	0.272422
6.16823	3.97356	0.29217
6.33515	4.00156	0.283421
6.50157	3.96746	0.274369
6.66823	3.97941	0.277311
6.83515	3.99011	0.298649
7.00157	3.97889	0.266451
7.16823	3.96235	0.280285
7.3349	3.95844	0.271822
7.50157	3.94009	0.279372
7.66823	3.94763	0.253548
7.8349	3.95279	0.266513
8.00157	3.87639	0.254527
8.16823	3.77656	0.254875
8.3349	3.74159	0.246574
8.50157	3.67448	0.229729
8.66823	3.61641	0.253835
8.8349	3.56093	0.256836
9.00182	3.49851	0.24547
9.16823	3.46946	0.248682
9.3349	3.48108	0.263377
9.50157	3.37927	0.280203
9.66823	3.39716	0.260686
9.83515	3.37805	0.266416
10.0016	3.36922	0.278628
10.1685	3.34245	0.286044
10.3349	3.2989	0.283606
10.5016	3.30247	0.280392
10.6682	3.28426	0.276133
10.8352	3.27393	0.292197
11.0016	3.27057	0.276404
11.1682	3.22171	0.298085
11.3349	3.21998	0.295184
11.5018	3.20774	0.289678
11.6682	3.21074	0.304346
11.8349	3.17963	0.282335
12.0016	3.19977	0.298327
12.1685	3.1798	0.304434
12.3349	3.15992	0.29862
12.5018	3.15633	0.29065
12.6685	3.13405	0.301537
12.8349	3.17184	0.30644
13.0016	3.14185	0.312696
13.1682	3.10016	0.276736
13.3349	3.14238	0.300204
13.5018	3.11539	0.296309
13.6685	3.13587	0.314529
13.8349	3.09623	0.288294
14.0016	3.08698	0.300449
14.1682	3.09218	0.28917
14.3349	3.07085	0.295108
14.5016	3.06408	0.304052
14.6682	3.08664	0.297758
14.8352	3.07371	0.301521
15.0016	3.07378	0.310934
15.1682	3.03802	0.302792
15.3349	2.97701	0.321597
15.5016	2.85118	0.278977
15.6682	2.74875	0.281132
15.8349	2.72396	0.276739
16.0016	2.64802	0.266787
16.1682	2.65366	0.247526
16.3349	2.5217	0.245575
16.5016	2.36622	0.232513
16.6682	2.5115	0.242519
16.8352	2.49048	0.232128
17.0016	2.4749	0.230977
17.1682	2.44253	0.227723
17.3349	2.47068	0.235595
17.5016	2.44609	0.232976
17.6685	2.41942	0.218309
17.8351	2.42185	0.219279
18.0016	2.43414	0.222937
18.168	2.44777	0.227466
18.3349	2.45526	0.22952
18.5016	2.42727	0.229359
18.6685	2.42524	0.21466
18.8349	2.39865	0.21732
19.0016	2.39893	0.208418
19.1682	2.43662	0.21445
19.3349	2.426	0.221273
19.5018	2.42459	0.218701
19.6685	2.43156	0.212431
19.8351	2.34187	0.226497
20.0016	2.31737	0.208628
20.1682	2.44896	0.226169
20.3349	2.53123	0.227775
20.5018	2.61251	0.236052
20.6685	2.46782	0.213182
20.8349	2.69963	0.230595
21.0016	2.6995	0.229731
21.1682	3.04414	0.270695
21.3351	2.82765	0.238885
21.5016	2.87877	0.232429
21.6685	2.95329	0.249881
21.8349	2.96051	0.26949
22.0016	2.9965	0.25614
22.1682	3.0049	0.276265
22.3349	3.00858	0.243307
22.5016	3.05014	0.254672
22.6682	3.04247	0.276745
22.8351	3.06914	0.26241
23.0016	3.09846	0.263192
23.1685	3.13318	0.26475
23.3349	3.11769	0.2605
23.5018	3.11359	0.246249
23.6682	3.10758	0.260778
23.8349	3.14488	0.25973
24.0016	3.11965	0.265967
24.1682	3.13683	0.263061
24.3349	3.16959	0.256994
24.5013	3.17754	0.275177
24.6682	3.15846	0.245938
24.8351	3.15919	0.277163
25.0016	3.15156	0.288544
25.1682	3.13849	0.265412
25.3349	3.16056	0.261222
25.5016	3.18571	0.270996
25.6682	3.16977	0.268232
25.8349	3.16352	0.28212
26.0016	3.16452	0.275547
26.1685	3.16679	0.256419
26.3349	3.18456	0.276774
26.5016	3.18454	0.276733
26.6682	3.19083	0.259874
27.0016	3.16985	0.252721
27.1682	3.16834	0.255043
27.3349	3.13047	0.26453
27.5016	3.1614	0.266768
27.6682	3.1455	0.230966
27.8349	3.15195	0.260445
28.0016	3.13838	0.243267
28.1682	3.17484	0.278738
28.3351	3.09402	0.288493
28.5016	3.02446	0.28632
28.6682	2.9055	0.289496
28.8349	2.81145	0.273306
29.0018	2.71183	0.258253
29.1685	2.5886	0.246456
29.3349	2.49182	0.223561
29.5016	2.42785	0.208398
29.6682	2.34091	0.202368
29.8346	2.30869	0.197049
30.0016	2.26985	0.197529
30.1682	2.21018	0.17459
30.3349	2.19376	0.17652
30.5016	2.1926	0.192514
30.6685	2.16593	0.190289
30.8349	2.13207	0.197169
31.0016	2.1199	0.195861
31.1682	2.08341	0.175883
31.3349	2.05793	0.180509
31.5016	2.04144	0.166889
31.6682	2.01638	0.173723
31.8349	2.01328	0.175475
32.0016	1.89092	0.157375
32.1685	1.97577	0.169703
32.3349	1.98482	0.168913
32.5016	1.96386	0.172604
32.6682	1.9786	0.162846
32.8349	1.97148	0.175698
33.0016	1.96517	0.1697
33.1682	1.96056	0.163135
33.3349	1.94833	0.164357
33.5018	1.9485	0.179263
33.6682	1.94796	0.170292
33.8351	1.93709	0.179796
34.0016	1.94097	0.173002
34.1682	1.92992	0.177812
34.3349	1.93417	0.182368
34.5018	1.92135	0.171888
34.6682	1.92188	0.167192
34.8351	1.93933	0.187586
35.0016	1.92734	0.186588
35.1682	1.93742	0.180612
35.3349	1.95021	0.179241
35.5016	1.97096	0.173474
35.6685	1.99272	0.181858
35.8351	1.99887	0.175574
36.0018	2.00944	0.175558
36.1682	2.03105	0.181732
36.3349	2.03998	0.186684
36.5018	2.06541	0.174395
36.6682	2.06826	0.177962
36.8349	2.0962	0.175011
37.0016	2.13104	0.186479
37.1682	2.12751	0.182063
37.3349	2.16674	0.199188
37.5016	2.20204	0.192736
37.6685	2.23974	0.194816
37.8349	2.28531	0.210993
38.0018	2.30659	0.211564
38.1685	2.35414	0.208112
38.3349	2.38009	0.202369
38.5016	2.44548	0.217614
38.6682	2.46339	0.213535
38.8351	2.51331	0.21605
39.0016	2.56375	0.219832
39.1682	2.60387	0.214239
39.3349	2.63693	0.231786
39.5016	2.68081	0.232726
39.6682	2.7122	0.252433
39.8351	2.73771	0.241239
40.0016	2.79013	0.24832
40.1682	2.81809	0.23809
40.3351	2.83498	0.226415
40.5016	2.85303	0.258019
40.6682	2.88208	0.234515
40.8349	2.89832	0.237625
41.0016	2.89872	0.242668
41.1685	2.91962	0.227359
41.3349	2.94415	0.223582
41.5016	2.95205	0.230332
41.6682	2.97046	0.233843
41.8349	2.99237	0.233089
42.0018	3.03076	0.255714
42.1685	3.00129	0.216756
42.3351	3.01929	0.237957
42.5018	3.03687	0.2307
42.6682	3.03518	0.235826
42.8349	3.07256	0.247413
43.0016	3.09024	0.233062
43.1685	3.08975	0.232498
43.3349	3.10493	0.26835
43.5018	3.11228	0.25762
43.6685	3.10076	0.240077
43.8349	3.12799	0.242044
44.0016	3.16707	0.256691
44.1682	3.13236	0.241984
44.3349	3.16429	0.242859
44.5016	3.12208	0.245003
44.6682	3.12946	0.220709
44.8349	3.14902	0.239387
45.0016	3.17276	0.254006
45.1682	3.2522	0.257937
45.3349	3.11766	0.257117
45.5016	3.0155	0.239823
45.6682	3.11781	0.219467
45.8349	3.17211	0.246525
46.0016	3.1621	0.247665
46.1682	3.12167	0.264959
46.3349	2.90628	0.263278
46.5013	2.75183	0.265156
46.6682	2.58853	0.235419
46.8351	2.49983	0.257494
47.0016	2.39192	0.229834
47.1685	2.3205	0.233936
47.3346	2.25115	0.229421
47.5016	2.16733	0.212216
47.6685	2.13761	0.208614
47.8351	2.09426	0.18403
48.0018	2.06573	0.19881
48.1682	2.04171	0.184337
48.3349	2.01756	0.187611
48.5018	2.00471	0.178069
48.6685	1.99646	0.184218
48.8349	1.97775	0.18605
49.0016	1.96801	0.180139
49.1682	1.94393	0.179521
49.3349	1.94734	0.184023
49.5016	1.91328	0.165008
49.6682	1.92716	0.18261
49.8349	1.91002	0.169061
50.0018	1.94745	0.175581
50.1682	1.91884	0.184368
50.3349	1.90895	0.176495
50.5018	1.90111	0.161782
50.6682	1.91583	0.17627
50.8349	1.89267	0.160916
51.0016	1.9014	0.166549
51.1682	1.90275	0.174844
51.3349	1.8875	0.167256
51.5016	1.88617	0.176799
51.6682	1.87725	0.171088
51.8349	1.96385	0.190443
52.0016	1.96769	0.18929
52.1682	1.93788	0.17088
52.3349	1.91964	0.16387
52.5016	1.94835	0.174147
52.6682	1.92777	0.169943
52.8349	1.91933	0.177453
53.0016	1.93144	0.182009
53.1682	1.90879	0.176484
53.3349	1.9129	0.16559
53.5018	1.90257	0.166227
53.6682	1.90259	0.16013
53.8349	1.8983	0.166913
54.0018	1.90509	0.173686
54.1682	1.91573	0.175146
54.3349	1.92368	0.176649
54.5016	1.95323	0.171968
54.6685	1.9613	0.181457
54.8349	1.98722	0.17762
55.0016	1.99939	0.180768
55.1682	2.03795	0.178901
55.3349	2.04968	0.192089
55.5018	2.06829	0.17882
55.6682	2.08611	0.180764
55.8349	2.10783	0.182666
56.0013	2.12289	0.175662
56.1682	2.10923	0.190106
56.3349	2.12527	0.172102
56.5016	2.17244	0.18412
56.6682	2.20685	0.189412
56.8346	2.25671	0.200661
57.0016	2.29692	0.220705
57.1682	2.32177	0.219079
57.3349	2.35269	0.216143
57.5016	2.39913	0.217878
57.6682	2.45514	0.219027
57.8349	2.49508	0.23504
58.0016	2.52331	0.236305
58.1685	2.56616	0.223287
58.3349	2.61259	0.243957
58.5018	2.64707	0.242064
58.6685	2.67308	0.242281
58.8349	2.71038	0.226282
59.0018	2.72609	0.24498
59.1682	2.77562	0.246139
59.3351	2.83565	0.25833
59.5016	2.84704	0.242287
59.6682	2.88379	0.249705
59.8349	2.88167	0.244173
60.0016	3.00131	0.268992
60.1682	3.01887	0.271753
60.3349	3.07732	0.28215
60.5016	3.07504	0.297821
60.6685	3.13603	0.307603
60.8349	3.15113	0.301999
61.0016	3.19492	0.300099
61.1685	3.16015	0.306685
61.3349	3.17542	0.310279
61.5018	3.21654	0.30532
61.6685	3.23576	0.311764
61.8349	3.26056	0.319198
62.0016	3.2632	0.337321
62.1685	3.28901	0.337578
62.3349	3.28317	0.299116
62.5016	3.26805	0.320356
62.6682	3.30889	0.308367
62.8349	3.31619	0.337059
63.0016	3.3189	0.337704
63.1682	3.30782	0.308273
63.3349	3.33085	0.32918
63.5016	3.3253	0.31041
63.6682	3.38161	0.308903
63.8349	3.38355	0.340075
64.0016	3.41631	0.357418
64.1682	3.36994	0.307967
64.3346	3.37313	0.322467
64.5018	3.41146	0.330547
64.6682	3.37785	0.311092
64.8349	3.39518	0.320265
65.0013	3.37126	0.300983
65.1682	3.39989	0.318045
65.3349	3.35618	0.32164
65.5016	3.35795	0.303658
65.6682	3.33871	0.302958
65.8346	3.37412	0.315102
66.0016	3.3174	0.307393
66.1682	3.32789	0.287384
66.3349	3.32676	0.277377
66.5016	3.31651	0.275613
66.6682	3.33776	0.293545
66.8349	3.33291	0.294839
67.0018	3.31309	0.289594
67.1685	3.29041	0.293406
67.3349	3.31801	0.299545
67.5016	3.31088	0.304632
67.6682	3.3008	0.276298
67.8351	3.30056	0.281882
68.0016	3.28801	0.327406
68.1682	3.26949	0.275588
68.3352	3.24918	0.278975
68.5013	3.29848	0.28556
68.6682	3.2838	0.295953
68.8349	3.27756	0.281695
69.0018	3.30644	0.305402
69.1685	3.31971	0.284692
69.3349	3.26211	0.270834
69.5016	3.27436	0.279821
69.6682	3.28139	0.288632
69.8349	3.27255	0.293066
70.0016	3.30312	0.284765
70.1682	3.2722	0.308815
70.3349	3.25192	0.271497
70.5016	3.25917	0.303042
70.6685	3.26199	0.287983
70.8349	3.26017	0.277923
71.0018	3.25466	0.285204
71.1682	3.26128	0.296165
71.3352	3.29662	0.291319
71.5018	3.27333	0.277808
71.6685	3.29271	0.289219
71.8349	3.2702	0.286874
72.0016	3.28945	0.292386
72.1685	3.20124	0.26803
72.3349	3.18356	0.271307
72.5016	3.15662	0.271279
72.6682	3.19962	0.277385
72.8349	3.19782	0.268851
73.0016	3.20591	0.284575
73.1682	3.21339	0.294596
73.3352	3.17406	0.272055
73.5016	3.17993	0.249226
73.6682	3.21273	0.26512
73.8349	3.17862	0.275415
74.0016	3.19667	0.270355
74.1682	3.18921	0.278943
74.3352	3.20606	0.273537
74.5016	3.17363	0.286528
74.6685	3.20793	0.27639
74.8349	3.18559	0.264108
75.0016	3.18062	0.285978
75.1682	3.21895	0.278815
75.3349	3.16233	0.258485
75.5016	3.19108	0.274437
75.6685	3.18061	0.255829
75.8349	3.18229	0.3016
76.0016	3.21777	0.282951
76.1682	3.20037	0.260867
76.3349	3.18975	0.262531
76.5016	3.21101	0.290399
76.6682	3.21103	0.296834
76.8349	3.18401	0.280705
77.0016	3.0883	0.281413
77.1682	3.22938	0.299913
77.3349	3.23232	0.286564
77.5016	3.19307	0.286674
77.6682	3.12489	0.254792
77.8349	3.10161	0.249742
78.0016	3.17539	0.278048
78.1682	3.14933	0.284078
78.3352	3.12041	0.248163
78.5018	3.11513	0.2604
78.6685	3.17944	0.279704
78.8349	3.1729	0.297667
79.0016	3.13231	0.29189
79.1685	3.13495	0.27931
79.3349	3.21384	0.299793
79.5018	3.12071	0.254688
79.6685	3.12085	0.261433
79.8349	3.13715	0.258163
80.0016	3.10517	0.253388

## Sheet: DATA
TMR channel (background corrected intensities)												FRET channel (background corrected intensities)												Ratio (TMR ch. / FRET ch.)
Axis [s]	ROI.001 []	ROI.002 []	ROI.003 []	ROI.004 []	ROI.005 []	ROI.006 []	ROI.007 []	ROI.008 []	ROI.009 []	ROI.010 []		Axis [s]	ROI.001 []	ROI.002 []	ROI.003 []	ROI.004 []	ROI.005 []	ROI.006 []	ROI.007 []	ROI.008 []	ROI.009 []	ROI.010 []		Axis [min]	ROI.001 []	ROI.002 []	ROI.003 []	ROI.004 []	ROI.005 []	ROI.006 []	ROI.007 []	ROI.008 []	ROI.009 []	ROI.010 []		Time [min]	Average Ratio	SD	SEM
0	9119.24	5686.39	9098.5	7263.85	6412.12	6135.25	5848.31	4762.46	8585.88	5883.14		0	3618.21	1777.89	3509.92	2378.26	1931.88	1891.27	1801.2	1622.52	3170.01	1776.09		0	2.52037	3.19839	2.59222	3.05428	3.31911	3.24398	3.24691	2.93523	2.70847	3.31242		0	3.01314	0.306596	0.0969543
10.094	9000.18	5624.14	9098.97	7150.4	6407.82	6095.01	5860.03	4729.06	8370.62	5791.91		10.094	3655.64	1795.82	3489.97	2410.8	1938.11	1868.89	1839.42	1620.8	3263.69	1772.54		0.168233	2.462	3.13179	2.60718	2.96598	3.30621	3.2613	3.18581	2.91773	2.56478	3.26757		0.168233	2.96704	0.318986	0.100872
20.094	9079.14	5697.83	9150.83	7226.03	6478.69	6149.33	5865.87	4759.44	8575.26	5865.6		20.094	3626.2	1790.03	3506.16	2451.93	1968.52	1872.52	1860.66	1629.46	3196.23	1793.78		0.3349	2.50376	3.1831	2.60993	2.94708	3.29115	3.28399	3.15258	2.92087	2.68293	3.26996		0.3349	2.98454	0.298275	0.0943228
30.109	9116.04	5610.48	9149.33	7340.21	6409.04	6058.27	5956.67	4769.7	8447.7	5843.04		30.109	3619.85	1777.59	3433.01	2472.5	1929.83	1879.91	1868.95	1639.03	3175.05	1786.01		0.501817	2.51835	3.15623	2.66511	2.96874	3.32105	3.22263	3.18717	2.91008	2.66065	3.27155		0.501817	2.98816	0.289209	0.0914561
40.094	9027.93	5651.08	9099.56	7275.04	6432.47	6201.77	5944.67	4753.47	8468.2	5884		40.094	3577.56	1823.42	3479.53	2456.68	1953.58	1900.99	1883.25	1640.06	3188.75	1810.37		0.668233	2.52349	3.09916	2.61517	2.96133	3.29266	3.26239	3.1566	2.89835	2.65565	3.25016		0.668233	2.9715	0.288458	0.0912185
50.094	9071.25	5733.97	9109.37	7321.93	6527.1	6179.51	5918.39	4774.2	8568.05	5835.48		50.094	3624.27	1850.77	3543.38	2494.3	1967.66	1908.23	1889.24	1653.13	3263.91	1814.55		0.8349	2.50292	3.09816	2.57081	2.93547	3.31719	3.23835	3.13268	2.88798	2.62508	3.21595		0.8349	2.95246	0.29763	0.0941188
60.109	8994.62	5749.85	9065.42	7476.46	6418.06	6189.98	5992.26	4758.67	8427.56	5829.07		60.109	3576.12	1823.32	3489.58	2498.71	1949.86	1928.84	1890.36	1630.84	3200.02	1795.76		1.00182	2.51519	3.15351	2.59785	2.99213	3.29155	3.20917	3.16991	2.91792	2.63359	3.24601		1.00182	2.97268	0.292891	0.0926201
70.109	8930.69	5806.17	9088.72	7430.69	6479.8	6200.13	5990.02	4758.05	8413.82	5915.53		70.109	3592.18	1824.8	3538.51	2564.73	1955.69	1897.49	1890.13	1647.21	3179.64	1805.16		1.16848	2.48615	3.18182	2.56852	2.89726	3.3133	3.26755	3.1691	2.88855	2.64616	3.27701		1.16848	2.96954	0.315746	0.0998476
80.094	8884.16	5655.48	8972.66	7370.13	6480.59	6137.3	5961.47	4721.87	8266.36	5838.05		80.094	3551.03	1807	3458.85	2516.43	1945.38	1879.9	1882.62	1634.39	3179.08	1830.43		1.3349	2.50185	3.12977	2.59412	2.9288	3.33128	3.2647	3.16658	2.88907	2.60023	3.18943		1.3349	2.95958	0.304418	0.0962655
90.094	8794.76	5662.36	9008.19	7319.25	6423.43	6122.87	5878.5	4698.43	8214.84	5791.01		90.094	3591.34	1802.3	3445.53	2513.18	1972.27	1867.53	1870.08	1637.72	3124.75	1802.71		1.50157	2.44888	3.14173	2.61446	2.91235	3.25687	3.2786	3.14345	2.86888	2.62896	3.2124		1.50157	2.95066	0.301838	0.0954495
100.094	8798.48	5695.47	9007.07	7331.48	6489.34	6076.48	5862.26	4716.04	8270.24	5877.44		100.094	3511.89	1834.72	3512.61	2478.76	2012.14	1851.02	1842.77	1639.48	3124.7	1807.95		1.66823	2.50534	3.10428	2.56421	2.95772	3.22508	3.28277	3.18122	2.87656	2.64674	3.25089		1.66823	2.95948	0.297636	0.0941209
110.094	8792.23	5739.03	9058.04	7427.23	6438.37	6087.66	5887.35	4720.19	8471.48	5888.61		110.094	3574	1817.25	3473.29	2589.43	1982.9	1914.69	1884.08	1647.17	3147.46	1832.74		1.8349	2.46006	3.15809	2.60791	2.86829	3.24694	3.17945	3.12479	2.86564	2.69152	3.21301		1.8349	2.94157	0.283002	0.0894931
120.094	8734.78	5701.1	9038.8	7344.98	6476.69	6078.57	5887.99	4712.94	8297.92	5932.58		120.094	3546.83	1851.69	3464.01	2530.54	2027.79	1928.7	1880.43	1643.44	3145.11	1845.45		2.00157	2.4627	3.07887	2.60934	2.90254	3.19397	3.15163	3.13119	2.86772	2.63836	3.21471		2.00157	2.9251	0.273484	0.0864831
130.094	8742.44	5709.38	8986.95	7361.79	6517.33	6122.83	5902.71	4727.56	8277.06	5895.07		130.094	3391.25	1748.67	3266.14	2373.25	1890.14	1822.38	1809.62	1555.46	2923.39	1727.18		2.16823	2.57794	3.265	2.75155	3.10198	3.44807	3.35979	3.26184	3.03933	2.83132	3.41311		2.16823	3.10499	0.299941	0.0948497
140.094	8775.92	5681.8	9111.22	7410.42	6447.09	6135.93	5864.24	4705.67	8130.62	5837.97		140.094	3248.87	1667.7	3170.41	2357.57	1882.56	1789.98	1728.43	1498.2	2829.6	1657.34		2.3349	2.70122	3.40696	2.87383	3.14324	3.42463	3.42793	3.39282	3.14088	2.87341	3.5225		2.3349	3.19074	0.289466	0.091537
150.109	8908.35	5770.19	9171.11	7514.29	6611.53	6156.3	5946.71	4759.77	8404.35	5876.31		150.109	3163.73	1641.2	3065.57	2267.05	1836.39	1750.39	1733.03	1472.74	2764.41	1635.05		2.50182	2.81577	3.51584	2.99165	3.31457	3.60029	3.5171	3.4314	3.23192	3.0402	3.59397		2.50182	3.30527	0.276728	0.0875091
160.094	9164.16	5943.98	9576.9	7840.67	6870.6	6419.66	6266.69	4984.76	8680.78	6131.5		160.094	3233.21	1674.93	3157.58	2339.81	1892.98	1845.37	1735.06	1520.9	2837.96	1678.23		2.66823	2.83438	3.5488	3.03299	3.35098	3.62951	3.4788	3.6118	3.2775	3.05881	3.65356		2.66823	3.34771	0.288921	0.0913649
170.094	9138.06	5922.88	9451.91	7897.01	6867.67	6346.34	6282.14	4949.65	8665.21	6125.71		170.094	3133.26	1627.63	3049.91	2285.55	1840.29	1751.71	1713.37	1470.4	2676.8	1637.46		2.8349	2.91647	3.63896	3.09908	3.45519	3.73183	3.62294	3.66654	3.36619	3.23716	3.74098		2.8349	3.44753	0.286103	0.0904736
180.109	9005.2	5861.05	9321.71	7719.97	6685.47	6383.43	6183.18	4894.42	8559.09	6074.71		180.109	2964.03	1525.18	2912.48	2191.07	1732.95	1671.32	1623.48	1411.96	2651.66	1577.37		3.00182	3.03815	3.84286	3.20061	3.52338	3.85786	3.8194	3.80861	3.46641	3.22782	3.85116		3.00182	3.56363	0.316999	0.100244
190.094	8972.54	5908.59	9344.5	7771.06	6592.42	6359.03	6191.92	4877.75	8606.22	5991.57		190.094	2921.81	1473.12	2879.84	2167.38	1705.64	1697.67	1650.54	1395.42	2580.43	1563.83		3.16823	3.07089	4.01092	3.2448	3.58546	3.86508	3.74575	3.75145	3.49554	3.33519	3.83135		3.16823	3.59364	0.302545	0.0956731
200.109	9051.97	5873.39	9333.03	7797.02	6617.69	6288.04	6246.33	4889.85	8473.08	5898.81		200.109	2854.87	1497.46	2772.39	2160.47	1683.64	1624.4	1625.68	1364.43	2570.56	1544.65		3.33515	3.17071	3.92224	3.36642	3.60894	3.93059	3.871	3.84228	3.5838	3.2962	3.81887		3.33515	3.6411	0.280427	0.0886787
210.109	8967.15	5804.95	9420.58	7881.8	6618.37	6394.24	6240.66	4882.4	8606.51	5965.07		210.109	2845.95	1488.11	2763.91	2112.62	1672.91	1663.82	1653.2	1348.77	2491.75	1520.39		3.50182	3.15085	3.9009	3.40842	3.73082	3.95621	3.84312	3.77491	3.61989	3.454	3.92337		3.50182	3.67625	0.264747	0.0837203
220.109	9007.93	5849.41	9527.61	7972.23	6703.16	6444.91	6268.47	4920.21	8630.35	6042.5		220.109	2837.97	1444.72	2732.91	2152.12	1670.86	1619.08	1644.46	1344.27	2522.6	1506.5		3.66848	3.17407	4.04881	3.48625	3.70435	4.0118	3.98061	3.81188	3.66013	3.42122	4.01096		3.66848	3.73101	0.297928	0.094213
230.094	9062.99	5938.65	9487.75	7975.06	6677.92	6453.29	6372.92	4933.18	8602.48	6014.02		230.094	2823.98	1463.14	2748.81	2201.06	1690.36	1655.78	1611.75	1344.6	2462.83	1528.24		3.8349	3.2093	4.05884	3.45158	3.62329	3.95059	3.89744	3.95404	3.66887	3.49293	3.93526		3.8349	3.72421	0.278247	0.0879896
240.109	9076.07	5930.4	9482.17	8051.02	6734.33	6484.57	6334.39	4962.06	8802.19	6165.93		240.109	2776.46	1426.96	2717.37	2104.34	1662.77	1670.41	1648.79	1332.81	2467.31	1521.15		4.00182	3.26893	4.15597	3.48946	3.82591	4.05007	3.88203	3.84184	3.723	3.56753	4.05348		4.00182	3.78582	0.278703	0.0881337
250.109	9027.99	5885.64	9508.86	8051.43	6680.92	6508.5	6404.09	4923.92	8695.64	6094.61		250.109	2777.64	1412.65	2683.63	2087.12	1641.76	1615.14	1601.54	1325.55	2500.97	1510.04		4.16848	3.25024	4.16637	3.54328	3.85768	4.06935	4.02968	3.9987	3.71462	3.47691	4.03606		4.16848	3.81429	0.304748	0.0963698
260.094	9032.83	5958.11	9550.52	7948.44	6666.46	6624.81	6449.4	4932.37	8623.86	6118.46		260.094	2739.25	1397.15	2695.4	2090.22	1594.34	1608.75	1586.11	1310.34	2409.96	1467.2		4.3349	3.29755	4.26446	3.54327	3.80269	4.18132	4.11798	4.06617	3.7642	3.57842	4.17016		4.3349	3.87862	0.329485	0.104192
270.094	9077.72	5869.95	9564.12	7941.66	6712.05	6559.8	6424.12	4948.75	8648.07	6140.04		270.094	2728.8	1409.34	2648.6	2090.44	1614.69	1615.66	1595.35	1300.08	2383.79	1458.62		4.50157	3.32664	4.16504	3.61102	3.79904	4.15687	4.06014	4.02678	3.8065	3.62787	4.20949		4.50157	3.87894	0.293359	0.0927683
280.109	9037.38	5924.16	9502.56	8074.09	6712.15	6666.97	6457.69	4960.72	8663.51	6123.77		280.109	2706.28	1379.37	2628.85	2074.08	1620.05	1570.04	1586.23	1294.35	2345.56	1481.12		4.66848	3.33941	4.29484	3.61472	3.89285	4.14317	4.24638	4.0711	3.8326	3.69358	4.13455		4.66848	3.92632	0.30826	0.0974803
290.094	8994.89	5961.81	9570.14	7910.67	6735.35	6584.08	6406.5	4955.83	8769.83	6223.8		290.094	2677.49	1365.36	2609.58	2031.07	1591.17	1608.53	1567.44	1283.2	2357.36	1461.98		4.8349	3.35945	4.36647	3.66731	3.89482	4.23295	4.09323	4.08724	3.86208	3.72019	4.2571		4.8349	3.95408	0.312561	0.0988404
300.094	9083.99	5951.41	9514.7	7977.94	6739.45	6687.76	6470.61	4965.12	8655.18	6204.53		300.094	2709.07	1394.06	2635.13	2030.16	1587.07	1612.97	1573.8	1291.79	2368.08	1526.05		5.00157	3.35318	4.26913	3.61071	3.92971	4.24647	4.14624	4.11146	3.84361	3.65494	4.06574		5.00157	3.92312	0.30379	0.0960669
310.109	9034.28	5939.17	9572.53	8006.71	6710.3	6583.12	6400.21	4951.48	8697.81	6187.29		310.109	2668.88	1382.93	2533.78	2015.82	1604.95	1612	1566.41	1281.31	2367.36	1484.99		5.16848	3.38504	4.29462	3.77796	3.97193	4.181	4.08383	4.08591	3.86439	3.67405	4.16655		5.16848	3.94853	0.276508	0.0874396
320.109	9078.96	5890.55	9659.3	8133.53	6779.53	6723.15	6474.56	4987.87	8712.94	6224.58		320.109	2660.85	1401.76	2619.47	2034.36	1601.85	1605.55	1566.28	1277.12	2409.79	1492.38		5.33515	3.41206	4.20227	3.6875	3.99809	4.23231	4.18743	4.13373	3.90555	3.61564	4.17091		5.33515	3.95455	0.289911	0.0916779
330.094	9140.51	5956.72	9624.63	8064.75	6824.59	6814.68	6488.61	4999.5	8796.67	6138.53		330.094	2678.12	1364.6	2579.25	2022.7	1609.73	1595.97	1582.14	1285.12	2380.03	1469.67		5.50157	3.41304	4.36519	3.73156	3.98712	4.23958	4.26992	4.10116	3.8903	3.69604	4.17681		5.50157	3.98707	0.302696	0.0957207
340.109	9180.09	6053.3	9726.5	8106.66	6833.19	6854.28	6521.12	5027	8870.38	6207.96		340.109	2676.69	1378.6	2625.43	2107.32	1615.32	1670.93	1607.21	1290.78	2410.41	1467.36		5.66848	3.42964	4.3909	3.70472	3.8469	4.23024	4.10209	4.05743	3.89456	3.68003	4.23071		5.66848	3.95672	0.298787	0.0944847
350.094	9197.32	6040.61	9702.96	8131.73	6828.66	6864.59	6467.71	5017.38	8794.01	6224.28		350.094	2727.5	1380.54	2609.49	2049.3	1634.76	1635.22	1578.86	1293.68	2366.66	1487.24		5.8349	3.37207	4.37555	3.71834	3.96805	4.17715	4.19797	4.09645	3.87838	3.71579	4.18511		5.8349	3.96849	0.301012	0.0951883
360.109	9242.17	6091.91	9597.58	8179.17	6890.9	6838.24	6573.35	5032.43	8894.75	6303.46		360.109	2678.81	1417.28	2624.96	2083.29	1620.47	1663.04	1589.45	1293.36	2318.71	1513.44		6.00182	3.4501	4.29832	3.65627	3.92609	4.25242	4.1119	4.13562	3.89098	3.83607	4.165		6.00182	3.97228	0.272422	0.0861473
370.094	9253.72	6093.16	9653.2	8278.18	6857.3	6925.27	6541.51	5055.92	8976.75	6236.09		370.094	2703.92	1392.77	2599.18	2041.24	1659.83	1626.12	1625.53	1297.35	2430.35	1497.62		6.16823	3.42233	4.37484	3.71394	4.05547	4.13133	4.25875	4.02423	3.89712	3.69361	4.16402		6.16823	3.97356	0.29217	0.0923924
380.109	9311.18	6090.61	9583.79	8211.99	7018.87	6959.27	6621.33	5095.97	8931.8	6383.22		380.109	2719.37	1389.84	2543.76	2095.48	1639.84	1666.26	1609.76	1304.13	2313.46	1525.44		6.33515	3.42402	4.38224	3.76757	3.9189	4.28022	4.17659	4.11325	3.90755	3.86079	4.18452		6.33515	4.00156	0.283421	0.0896257
390.094	9465.63	6199.36	9826.43	8413.96	7100.32	7224.44	6732.27	5194.2	9188.04	6446.26		390.094	2759.09	1428.05	2600.66	2109.24	1725.36	1696.79	1658.87	1344.01	2473.52	1562.88		6.50157	3.43071	4.34115	3.77844	3.98909	4.11527	4.25771	4.05836	3.8647	3.71457	4.1246		6.50157	3.96746	0.274369	0.0867631
400.094	9473.59	6210.45	9968.73	8455.55	7117.2	7175.16	6773.75	5211.67	9335.28	6523.77		400.094	2740.88	1438.53	2708.06	2152.27	1673.14	1732.9	1633.7	1343.18	2454.51	1558.24		6.66823	3.4564	4.31723	3.68113	3.92867	4.2538	4.14054	4.14626	3.8801	3.80332	4.18664		6.66823	3.97941	0.277311	0.0876934
410.109	9424.9	6281.82	9908.51	8530.09	7123.23	7194.53	6733.43	5205.81	9354.68	6499.1		410.109	2809.01	1434.61	2629.75	2159.26	1677.17	1701.47	1654.06	1345.12	2427.19	1555.52		6.83515	3.35523	4.37878	3.76785	3.95048	4.24716	4.22843	4.07085	3.87013	3.85411	4.1781		6.83515	3.99011	0.298649	0.0944412
420.094	9512.4	6238.12	9822.46	8484.55	7157.89	7203.23	6811.12	5202.87	9137.56	6429.32		420.094	2725.74	1417.05	2566.88	2171.97	1735.76	1704.38	1651.77	1343.41	2453.45	1570.82		7.00157	3.48984	4.40219	3.82661	3.90639	4.12378	4.22631	4.12353	3.87289	3.72437	4.09296		7.00157	3.97889	0.266451	0.0842592
430.094	9454.68	6198.52	9788.86	8486.15	7235.66	7131.57	6908.59	5212.88	9242.11	6418.04		430.094	2778.17	1481.16	2645.29	2140	1699.65	1723.34	1636.65	1354.23	2462.11	1546.58		7.16823	3.40321	4.18491	3.70049	3.96549	4.25714	4.13823	4.22118	3.84932	3.75373	4.14983		7.16823	3.96235	0.280285	0.0886338
440.094	9643.89	6340.1	9997.16	8717.64	7345.08	7348.98	6929.53	5329.87	9563.98	6566.46		440.094	2827.55	1490.11	2679.11	2221.12	1765.57	1761.05	1700.85	1381.17	2542.16	1550.89		7.3349	3.41069	4.25479	3.73151	3.92489	4.16017	4.17307	4.07416	3.85895	3.76215	4.234		7.3349	3.95844	0.271822	0.0859578
450.094	9744.96	6444.2	9937.72	8805.42	7350.57	7407.27	6964.72	5351.77	9502.65	6710.39		450.094	2848.14	1487.61	2691.98	2213.08	1764.27	1794.25	1706.62	1393.64	2592.99	1638.09		7.50157	3.42152	4.33191	3.6916	3.9788	4.16635	4.12834	4.081	3.84013	3.66474	4.09647		7.50157	3.94009	0.279372	0.0883452
460.094	9879.3	6467.6	10074.8	9054.99	7478.49	7529.89	7088.91	5415.8	9658.98	6710.69		460.094	2900.89	1522.46	2718.73	2293.93	1792.11	1849.79	1715.2	1404.23	2507.05	1643.46		7.66823	3.40561	4.24814	3.70569	3.94738	4.17302	4.07068	4.13299	3.85678	3.85273	4.08327		7.66823	3.94763	0.253548	0.0801791
470.094	9887.66	6561.39	10267.5	9008.71	7451.98	7666.17	7125.31	5425.06	9748.7	6804.09		470.094	2892.75	1515.01	2713.2	2297.59	1815.76	1811.88	1771.09	1426.16	2570.76	1651.75		7.8349	3.41808	4.33091	3.78426	3.92093	4.10406	4.23107	4.02312	3.80397	3.79214	4.11933		7.8349	3.95279	0.266513	0.0842789
480.094	9848.02	6492.78	10106.6	8965.85	7491.52	7630.14	7220.24	5417.79	9678.15	6757.56		480.094	2923.21	1577.64	2730.53	2335.43	1826.93	1836.27	1801.45	1443.17	2639.78	1666.53		8.00157	3.36891	4.1155	3.70133	3.83906	4.1006	4.15523	4.00802	3.75408	3.66628	4.05486		8.00157	3.87639	0.254527	0.0804884
490.094	9904.34	6605.89	10136.6	9062.03	7522.8	7558.72	7107.44	5435.96	9816.29	6798.73		490.094	3012.62	1587.19	2861.8	2372.21	1870.91	1920.44	1842.27	1479.98	2724.57	1759.9		8.16823	3.28762	4.162	3.54203	3.82009	4.02093	3.93593	3.85798	3.673	3.60287	3.86314		8.16823	3.77656	0.254875	0.0805984
500.094	9625.59	6519.16	9841.65	8940.02	7353.67	7527.92	7013.72	5330.82	9616.9	6774.93		500.094	2965.06	1599.58	2750.49	2453.96	1850.46	1922.2	1836.53	1477.62	2648.2	1726.39		8.3349	3.24634	4.07555	3.57814	3.6431	3.97397	3.9163	3.81901	3.6077	3.63148	3.92434		8.3349	3.74159	0.246574	0.0779735
510.094	9559.96	6431.18	9867.25	8905.32	7403.64	7610.34	7061.19	5326.88	9600.52	6712.88		510.094	3005.48	1611.09	2788.98	2468.97	1927.21	1976.84	1867.41	1493.85	2679.33	1763.94		8.50157	3.18085	3.99183	3.53795	3.6069	3.84164	3.84974	3.78127	3.56587	3.58318	3.80561		8.50157	3.67448	0.229729	0.0726468
520.094	9653.82	6460.61	9896.21	8813.44	7403.9	7528.14	7007.33	5312.14	9512.91	6703.5		520.094	3073.31	1647	2886.76	2511.59	1957.84	1918.64	1863.93	1522.74	2765.56	1778.13		8.66823	3.14118	3.92264	3.42814	3.50911	3.78167	3.92368	3.75944	3.48854	3.43977	3.76997		8.66823	3.61641	0.253835	0.0802696
530.094	9426.5	6404.14	9639.48	8671.63	7360.99	7490.57	6983.88	5264.6	9505.03	6682.53		530.094	3062.44	1664.44	2896.33	2511.24	1930.1	1986.4	1870.26	1525.39	2804.39	1785.46		8.8349	3.0781	3.84762	3.32817	3.45312	3.81378	3.77094	3.73419	3.45131	3.38934	3.74275		8.8349	3.56093	0.256836	0.0812188
540.109	9385.78	6404.75	9661.44	8658.98	7334.72	7384.79	6943.6	5228.3	9366.43	6680.7		540.109	3086.34	1674.73	2939.31	2512.47	1940.98	2025.87	1941.47	1548.89	2808.69	1817.69		9.00182	3.04107	3.82434	3.28697	3.4464	3.77887	3.64525	3.57647	3.37552	3.3348	3.67539		9.00182	3.49851	0.24547	0.0776245
550.094	9389.04	6384.22	9572.88	8626.06	7273.3	7463.38	6920.75	5226.56	9425.67	6635.82		550.094	3122.19	1705.04	2942.26	2542.31	1979.57	1996.5	1911.77	1560.06	2874.87	1825.49		9.16823	3.0072	3.74432	3.25358	3.393	3.67419	3.73824	3.62008	3.35023	3.27865	3.63509		9.16823	3.46946	0.248682	0.0786402
560.094	9410.08	6396.22	9564.76	8680.19	7303.31	7500.98	6981.97	5235.17	9429.65	6721.53		560.094	3144.72	1714.68	2976.88	2502.27	2003.12	1997.47	1885.09	1560.5	2884.47	1827.82		9.3349	2.99234	3.73028	3.21302	3.46892	3.64597	3.75523	3.70378	3.3548	3.26911	3.67734		9.3349	3.48108	0.263377	0.083287
570.094	9275.51	6374.38	9491.23	8657.86	7346.89	7352.4	6994.07	5217.34	9336.01	6682.23		570.094	3215.66	1734.51	3060.08	2574.16	1995.65	2023.9	1986.65	1599.02	3004.61	1875.26		9.50157	2.88448	3.67503	3.10163	3.36337	3.68145	3.63278	3.52054	3.26283	3.10723	3.56337		9.50157	3.37927	0.280203	0.0886081
580.094	9286.81	6310.86	9493.08	8766.73	7270.26	7357.45	6970.95	5186.68	9330.04	6682.85		580.094	3176.01	1723.49	3001.82	2561.81	2005.28	2017.79	1963.6	1588.89	2981.01	1864		9.66823	2.92405	3.66168	3.16244	3.42208	3.62557	3.64629	3.55009	3.26434	3.12982	3.58521		9.66823	3.39716	0.260686	0.0824361
590.109	9175.57	6264.36	9339.03	8573.15	7231.49	7254.47	6928.5	5135.23	9280.88	6596.51		590.109	3199.33	1689.12	2943.75	2585.62	1971.34	2046.36	1970.58	1577.74	2927.55	1852.23		9.83515	2.86796	3.70865	3.17249	3.3157	3.66831	3.54506	3.51596	3.25481	3.17019	3.56138		9.83515	3.37805	0.266416	0.0842482
600.094	9022.92	6287.98	9281.95	8504.74	7116.27	7247.71	6875.51	5071.75	9144.88	6584.23		600.094	3155.47	1694.57	2981.25	2547.49	1956.72	2029.74	1946.13	1565.65	2928.4	1845.64		10.0016	2.85945	3.71066	3.11344	3.33848	3.63684	3.57076	3.53291	3.23939	3.12282	3.56744		10.0016	3.36922	0.278628	0.0881099
610.109	8952.28	6208.83	9178.11	8519.13	7156.26	7246.19	6891.76	5055.75	9068.68	6644.07		610.109	3172.76	1695.53	2970.11	2590.5	1967.12	2044.65	1987.36	1570.56	2940.19	1840.96		10.1685	2.8216	3.66189	3.09016	3.28861	3.63793	3.54398	3.4678	3.21907	3.08439	3.60902		10.1685	3.34245	0.286044	0.0904551
620.094	8842	6136.02	9159.64	8463.22	7022.35	7219.69	6789.81	5017.29	8954.16	6520.59		620.094	3150.71	1757.93	3068.24	2568.19	1980.93	1984.76	1974.08	1556.53	2971.1	1835.6		10.3349	2.80635	3.49049	2.98531	3.29541	3.54497	3.63757	3.43948	3.22339	3.01375	3.55229		10.3349	3.2989	0.283606	0.089684
630.094	8805.77	6123.53	9177.96	8352	7036.48	7241.4	6815.07	4991.05	9022.65	6500.57		630.094	3158.59	1706.41	2971.86	2555.22	1946.11	2034.47	1981.44	1561.7	3003.74	1869.5		10.5016	2.78787	3.58854	3.08829	3.26861	3.61566	3.55935	3.43945	3.19592	3.0038	3.47716		10.5016	3.30247	0.280392	0.0886676
640.094	8766.51	6139.31	9065.48	8394.13	7008.2	7198.34	6870.48	4982.53	8878.51	6456.99		640.094	3164.66	1756.65	3004.78	2549.32	1955.93	2049.16	1961.42	1569.05	2939.08	1859.28		10.6682	2.77013	3.4949	3.01702	3.29269	3.58305	3.51282	3.5028	3.1755	3.02085	3.47284		10.6682	3.28426	0.276133	0.0873209
650.109	8758.57	6138.73	9017.95	8334.8	6984.22	7257.48	6841.2	4977.59	8929.99	6505.27		650.109	3192.21	1708.85	3018.81	2528.28	1963.46	2065.34	1972.61	1576.61	2995.68	1889.92		10.8352	2.74373	3.59231	2.98725	3.29662	3.5571	3.51394	3.4681	3.15715	2.98096	3.44209		10.8352	3.27393	0.292197	0.0924009
660.094	8743.45	6166.83	9076.67	8241.58	7006.35	7281.5	6887.54	4975.36	8892.51	6544.2		660.094	3164.73	1735.17	3027.7	2557.99	2000.86	2074.28	1966.25	1583.56	2922.2	1886.35		11.0016	2.76278	3.55402	2.99788	3.22189	3.50167	3.51037	3.50289	3.14189	3.04308	3.46925		11.0016	3.27057	0.276404	0.0874066
670.094	8607.33	6059.03	8938	8141.32	6927.83	7141.71	6730.89	4918.08	8821.83	6551.23		670.094	3195.62	1692.66	3018.05	2611.04	1981.97	2071.07	1962.23	1578.55	3009.05	1902.67		11.1682	2.69347	3.57959	2.96152	3.11804	3.49543	3.44832	3.43022	3.11556	2.93177	3.44318		11.1682	3.22171	0.298085	0.0942627
680.094	8641.92	6099.82	8811.88	8222.78	6892.54	7164.61	6882.43	4940.02	8860.93	6549.71		680.094	3206.78	1747.6	3054.18	2512.68	1976.29	2092.03	1974.74	1584.07	3030.43	1916.95		11.3349	2.69489	3.4904	2.88519	3.27251	3.48761	3.42472	3.48524	3.11856	2.92399	3.41673		11.3349	3.21998	0.295184	0.0933455
690.109	8642.92	6043.98	8880	8162.61	6964.92	7153.84	6822.44	4937.08	8843.28	6534.57		690.109	3226.68	1715.44	3052.85	2551.97	1972.26	2110.46	2017.72	1579.56	3010.87	1920.17		11.5018	2.67858	3.52329	2.90876	3.19855	3.53144	3.38971	3.38126	3.1256	2.93712	3.40313		11.5018	3.20774	0.289678	0.0916044
700.094	8705.06	6099.27	8862.59	8140.21	6972.77	7270.03	6847.8	4959.54	8825.48	6586.68		700.094	3217.75	1746.89	3060.76	2599.51	1961.2	2127.62	1999.07	1588.86	3059.19	1893.04		11.6682	2.70533	3.4915	2.89555	3.13144	3.55536	3.41698	3.42549	3.12145	2.88491	3.47941		11.6682	3.21074	0.304346	0.0962425
710.094	8578.74	5989.18	8857.96	7977.29	6897.09	7142.3	6819.72	4914.49	8856.08	6503.8		710.094	3220.36	1763.75	3040.21	2578.09	1963.58	2170.62	1950.49	1591.53	2998.8	1919.44		11.8349	2.6639	3.3957	2.9136	3.09426	3.5125	3.29044	3.49641	3.08791	2.9532	3.38839		11.8349	3.17963	0.282335	0.089282
720.094	8661.39	6108.77	8914.71	8085.28	6937.09	7218.8	6847.6	4950.48	8859.56	6693.86		720.094	3206.27	1746.88	3107.44	2512.89	1984.35	2143.08	2009.6	1604.89	3078.93	1923.99		12.0016	2.70139	3.49696	2.86883	3.21752	3.49589	3.36843	3.40744	3.08462	2.87748	3.47915		12.0016	3.19977	0.298327	0.0943391
730.109	8536.86	6050.74	8802.47	7970.01	6872.49	7226.19	6769.86	4940.85	8805.47	6661.33		730.109	3267.47	1752.25	3079.72	2526.87	1973.97	2120.02	1990.73	1612.54	3005.88	1938.91		12.1685	2.61268	3.45312	2.85821	3.1541	3.48155	3.40855	3.40069	3.06401	2.92942	3.43561		12.1685	3.1798	0.304434	0.0962704
740.094	8634.14	6087.68	8863.54	7938.67	6884.17	7226.47	6806.83	4951.97	8786.12	6666.88		740.094	3257.02	1764.63	3118.81	2556.62	2025.1	2124.64	1997.52	1621.53	3076.51	1941.88		12.3349	2.65093	3.44982	2.84196	3.10515	3.39942	3.40127	3.40765	3.05388	2.85588	3.43321		12.3349	3.15992	0.29862	0.0944318
750.109	8639.69	6099.89	8856.56	8014.6	6902.09	7210.71	6735.76	4966.98	8789.71	6661.46		750.109	3304.83	1810.23	3111.66	2545.55	1995.33	2138.15	1993.27	1627.62	3020.07	1952.51		12.5018	2.61426	3.36967	2.84625	3.14847	3.45912	3.37241	3.37925	3.05168	2.91044	3.41175		12.5018	3.15633	0.29065	0.0919115
760.109	8586.21	6118.99	8838.28	7944.56	6903.57	7307.2	6700.96	4965.12	8665.31	6680.14		760.109	3304.67	1804.45	3170.06	2503.34	2020	2167.46	2003.05	1629.14	3065.17	1976.03		12.6685	2.5982	3.39105	2.78805	3.17358	3.41761	3.37131	3.34538	3.0477	2.82703	3.38059		12.6685	3.13405	0.301537	0.0953545
770.094	8596.85	6176.03	8908.35	7884.03	6980.15	7231.21	6634.45	4957.66	8926.26	6738.46		770.094	3310.12	1820.1	3123.14	2472.04	1970.56	2174.33	1938.36	1632.25	3043.69	1967.06		12.8349	2.59714	3.39324	2.85237	3.18928	3.54221	3.32572	3.42272	3.03733	2.93271	3.42565		12.8349	3.17184	0.30644	0.0969048
780.094	8601.14	6103.28	8903.29	7867.99	6869.33	7278.37	6723.67	4971.31	8729.81	6776.27		780.094	3338.44	1814.98	3202.32	2501.12	1996.12	2147.74	2000.31	1636.74	3041.06	1961.91		13.0016	2.5764	3.36272	2.78026	3.14578	3.44133	3.38885	3.36131	3.03732	2.87065	3.45392		13.0016	3.14185	0.312696	0.0988832
790.094	8603.27	6094.83	8912.02	7812.78	6874.44	7243.29	6610.11	4953.43	8724.23	6629.45		790.094	3313.61	1786.04	3155.54	2568.73	2040.25	2210.42	2031.64	1650.47	3042.87	1973.72		13.1682	2.59635	3.41249	2.82424	3.04149	3.36941	3.27688	3.25358	3.00122	2.8671	3.35886		13.1682	3.10016	0.276736	0.0875115
800.094	8610.79	6158.64	8864.47	7795.93	6941.54	7336.41	6634.86	4972.49	8706.82	6726.88		800.094	3299.49	1806.81	3139.02	2557.84	2033.22	2165.97	1947.5	1650.16	2996.51	1974.62		13.3349	2.60973	3.40857	2.82396	3.04786	3.41406	3.38712	3.40686	3.01335	2.90565	3.40667		13.3349	3.14238	0.300204	0.0949327
810.109	8663.33	6129.78	8835.45	7883.2	6967.25	7315.81	6639	4997.64	8773.86	6773.39		810.109	3357.49	1860.93	3189.69	2518.05	2052.17	2223.05	1965.02	1660.41	3057.99	1971.64		13.5018	2.5803	3.29393	2.77001	3.13068	3.39506	3.29088	3.37859	3.00988	2.86916	3.43541		13.5018	3.11539	0.296309	0.0937011
820.109	8746.49	6214.39	8716.69	7841.46	7032.5	7365.73	6599.57	5032.99	8710.76	6932.52		820.109	3357.39	1817.61	3162.09	2493.29	2013.29	2221.55	1981.52	1665.09	3066.59	2020.86		13.6685	2.60515	3.419	2.75662	3.14503	3.49304	3.31559	3.33056	3.02266	2.84053	3.43048		13.6685	3.13587	0.314529	0.0994627
830.094	8698.75	6165.44	8718	7778.35	6917.44	7328.12	6549.15	4998.49	8645.67	6802.91		830.094	3352.32	1823.76	3168.24	2514.23	2039.43	2216.4	2033.16	1671.52	3030.15	2013.62		13.8349	2.59485	3.38062	2.75169	3.09373	3.39186	3.30631	3.22117	2.99039	2.85322	3.37846		13.8349	3.09623	0.288294	0.0911667
840.094	8642.98	6101.58	8749.13	7698.31	6956.05	7379.51	6628.79	4995.45	8564.62	6832.29		840.094	3395.88	1842.02	3154.34	2541.04	2042.6	2251.08	1982.65	1667.14	3042.77	2026.98		14.0016	2.54514	3.31243	2.77368	3.02959	3.40548	3.27821	3.34339	2.99641	2.81474	3.37067		14.0016	3.08698	0.300449	0.0950103
850.094	8669.72	6138.9	8786.25	7867.94	6913.22	7454.04	6542.22	5024.76	8702.29	6843.02		850.094	3409.86	1860.8	3166.4	2511.84	2057.22	2238.87	1973.5	1684.02	3051.63	2053.29		14.1682	2.54254	3.29906	2.77484	3.13234	3.36047	3.32937	3.31504	2.98379	2.85168	3.33271		14.1682	3.09218	0.28917	0.0914437
860.094	8731.58	6207.07	8831.1	7795.09	6993.48	7403.26	6649.73	5036.7	8722.98	6817.98		860.094	3414.92	1891.9	3183.24	2595	2041.91	2277.4	1984.38	1696.93	3127.91	2060.48		14.3349	2.55689	3.28087	2.77425	3.00389	3.42497	3.25075	3.35104	2.96812	2.78875	3.30892		14.3349	3.07085	0.295108	0.0933215
870.094	8705.02	6147.63	8685.41	7873.67	7022.33	7460.29	6566.45	5033.07	8716.02	6830.96		870.094	3442.22	1851.57	3201.19	2593.34	2057.33	2286.81	1993.13	1690.48	3125.17	2066.27		14.5016	2.5289	3.32023	2.71318	3.03611	3.41331	3.26232	3.29453	2.97731	2.78897	3.30594		14.5016	3.06408	0.304052	0.0961497
880.094	8791.9	6335.9	8745.94	7826.5	7043.81	7569.58	6633.53	5055.2	8669.38	6914.33		880.094	3425	1884.42	3140.89	2559.61	2068.13	2321.38	2020.09	1700.78	3107.6	2044.19		14.6682	2.56698	3.36225	2.78454	3.05769	3.40588	3.26081	3.28378	2.97228	2.78974	3.38243		14.6682	3.08664	0.297758	0.0941593
890.109	8819.12	6319.43	8730.81	7935.03	7110.07	7525.68	6755.96	5080.95	8823.91	6942.73		890.109	3486.85	1941.29	3193.79	2630.36	2084.2	2282.69	2021.15	1717.63	3093.65	2078.07		14.8352	2.52925	3.25528	2.73368	3.01671	3.41141	3.29684	3.34263	2.95812	2.85227	3.34095		14.8352	3.07371	0.301521	0.0953493
900.094	8868.36	6273.66	8818.66	8041.59	7218.96	7549.82	6837.9	5108.69	8808.39	7044.36		900.094	3507.5	1907.64	3246.22	2568.03	2126.1	2313.46	2031.58	1727.82	3183.7	2118.86		15.0016	2.5284	3.2887	2.71659	3.13142	3.3954	3.26343	3.3658	2.95674	2.76671	3.32461		15.0016	3.07378	0.310934	0.0983259
910.094	8705.43	6134.17	8663.11	7814.32	7046.74	7379.54	6641.74	5010.21	8634.9	6866.69		910.094	3481.85	1911.1	3235.92	2586.44	2080.13	2275.03	2027.68	1707.42	3085.99	2060.58		15.1682	2.50023	3.20975	2.67717	3.02126	3.38765	3.24371	3.27554	2.93437	2.79809	3.33242		15.1682	3.03802	0.302792	0.0957514
920.094	8524.89	6055.97	8481.54	7712.28	6903.34	7213.09	6591.3	4903.22	8435.99	6733.81		920.094	3555.43	1911.1	3203.88	2641.19	2100.48	2256.27	2014.18	1723.3	3117.71	2022.59		15.3349	2.39771	3.16884	2.64727	2.92001	3.28655	3.19691	3.27244	2.84524	2.70582	3.3293		15.3349	2.97701	0.321597	0.101698
930.094	8505.22	6006.53	8435.36	7674.59	6941.44	7328.88	6475.72	4880	8516.1	6628.22		930.094	3623	1983.51	3270.41	2765.66	2179.41	2336.36	2135.36	1785.73	3239.97	2161.86		15.5016	2.34757	3.02824	2.5793	2.77495	3.18501	3.13688	3.03261	2.73278	2.62845	3.06598		15.5016	2.85118	0.278977	0.0882204
940.094	8441.56	5979.76	8316.06	7595.01	6900.68	7243.86	6462.04	4845.04	8350.82	6666.67		940.094	3738.25	2017.71	3385.71	2846.67	2230.06	2451.29	2176.66	1842.57	3320.64	2237.99		15.6682	2.25816	2.96364	2.45622	2.66803	3.09439	2.95513	2.96879	2.6295	2.51482	2.97887		15.6682	2.74875	0.281132	0.0889018
950.094	8347.36	5958.7	8288.4	7536.16	6798.69	7197.66	6370.83	4803.74	8411.73	6682.37		950.094	3720.18	2049.48	3419.37	2826.04	2272.98	2437.26	2150.62	1858.11	3367.62	2221.52		15.8349	2.2438	2.90742	2.42396	2.66668	2.99109	2.95318	2.96232	2.58528	2.49783	3.00801		15.8349	2.72396	0.276739	0.0875125
960.094	7855.99	5632.68	7839.97	7203.69	6431.85	6838.02	6009.34	4526.32	7906.91	6339.74		960.094	3640.09	1996.57	3300.46	2761.79	2180.68	2342.8	2153.64	1788.27	3234.72	2198.99		16.0016	2.15819	2.82117	2.37542	2.60834	2.94948	2.91874	2.79032	2.53112	2.44439	2.88303		16.0016	2.64802	0.266787	0.0843655
970.094	8373.99	5883.7	8282.42	7576.71	6856.67	7270.58	6364.59	4788.39	8449.22	6621.65		970.094	3828.39	2083.38	3401.3	2889.05	2329.4	2500.54	2282.99	1900.96	3426.66	2328.39		16.1682	2.18734	2.82412	2.43508	2.62257	2.94353	2.9076	2.78784	2.51893	2.46573	2.84387		16.1682	2.65366	0.247526	0.0782746
980.094	8594.73	6043.13	8466.86	7824.95	6935.86	7299.41	6399.03	4895.62	8612.77	6831.03		980.094	4105.58	2230.49	3736.07	3163.33	2469.52	2617.62	2462.57	2053.38	3663.22	2489.99		16.3349	2.09342	2.70933	2.26625	2.47364	2.80859	2.78857	2.59852	2.38417	2.35115	2.7434		16.3349	2.5217	0.245575	0.0776577
990.094	7659.22	5451.43	7551.57	6878.41	6198.51	6518.45	5740.71	4355.13	7639.96	6096.13		990.094	3926.3	2125.37	3531.17	2985.65	2393.9	2502.64	2301.4	1949.85	3480.49	2356.32		16.5016	1.95075	2.56493	2.13855	2.30382	2.5893	2.60463	2.49445	2.23357	2.19508	2.58714		16.5016	2.36622	0.232513	0.0735272
1000.09	8356.71	5881.24	8151.49	7599.5	6810.12	7067.15	6225.21	4768.83	8328.73	6693.26		1000.09	4041.02	2222.14	3570.32	3050.95	2427.31	2545.11	2369.34	2014.11	3564.19	2467.88		16.6682	2.06797	2.64666	2.28312	2.49086	2.80563	2.77676	2.6274	2.36771	2.33678	2.71215		16.6682	2.5115	0.242519	0.0766913
1010.11	8409.47	5724.34	8214.52	7612.86	6768.45	7114.45	6214.87	4747.56	8348.6	6638.06		1010.11	4043.41	2186.35	3606.04	3104.1	2449.67	2579.56	2376.81	2023.24	3616.89	2471.56		16.8352	2.07979	2.61822	2.27799	2.45252	2.763	2.758	2.61479	2.34651	2.30822	2.68578		16.8352	2.49048	0.232128	0.0734053
1020.09	8559.48	5875.08	8358.93	7677.52	6836.02	7167.49	6356.26	4846.13	8482.15	6727.79		1020.09	4162.66	2211.8	3745.31	3151.58	2503.71	2642.49	2439.68	2062.7	3660.77	2534.99		17.0016	2.05625	2.65625	2.23184	2.43609	2.73036	2.7124	2.60537	2.34941	2.31704	2.65397		17.0016	2.4749	0.230977	0.0730414
1030.09	8653.73	5946.05	8453.93	7790.26	6917.11	7306.56	6387.39	4885.49	8491.23	6834		1030.09	4263.28	2342.82	3748.83	3225.34	2543.53	2729.87	2447.66	2125.06	3770.12	2598.27		17.1682	2.02983	2.53798	2.25508	2.41533	2.71949	2.67652	2.6096	2.29899	2.25224	2.63021		17.1682	2.44253	0.227723	0.0720122
1040.09	8633.39	5973.97	8463.86	7874.03	6919.04	7295.6	6367.1	4907.78	8521.33	6989.51		1040.09	4213.4	2272.98	3810.05	3274.97	2498.99	2722.54	2445.21	2097.83	3653.8	2608.22		17.3349	2.04903	2.62825	2.22145	2.4043	2.76874	2.6797	2.60391	2.33946	2.33219	2.6798		17.3349	2.47068	0.235595	0.0745017
1050.09	8631	5920.9	8367.75	7796.08	6834.93	7265.68	6304	4857.43	8586.01	6822.1		1050.09	4251.09	2261.15	3776.86	3289.51	2487.83	2751.2	2408.09	2101.54	3739.94	2610.48		17.5016	2.0303	2.61853	2.21553	2.36998	2.74735	2.64091	2.61784	2.31137	2.29576	2.61335		17.5016	2.44609	0.232976	0.0736734
1060.11	8739.34	5869.45	8389.27	7736.25	6876.43	7267.01	6305.22	4867.43	8542.75	6801.86		1060.11	4294.12	2324.25	3763.97	3347.2	2551.34	2733.23	2482.75	2125.69	3731.37	2595.31		17.6685	2.03519	2.52531	2.22883	2.31126	2.69523	2.65877	2.5396	2.28981	2.28944	2.62083		17.6685	2.41942	0.218309	0.0690353
1070.11	8726.44	5900.22	8459.65	7792.31	6878.15	7386.98	6201.19	4881.25	8493.47	6840.8		1070.11	4286.63	2332.77	3800.2	3300.83	2529.18	2781.17	2441.77	2132.01	3749.73	2634.2		17.8351	2.03574	2.52927	2.2261	2.36071	2.71951	2.65607	2.53963	2.28951	2.26509	2.59692		17.8351	2.42185	0.219279	0.0693423
1080.09	8814.59	5948.87	8527.62	7901.57	6921.19	7462.35	6361.53	4918.55	8558.4	6937.61		1080.09	4298.32	2309.31	3839.64	3351.36	2601.76	2756.38	2478.38	2156.84	3742.71	2633.3		18.0016	2.05071	2.57604	2.22094	2.35773	2.66019	2.7073	2.56681	2.28044	2.28669	2.63457		18.0016	2.43414	0.222937	0.070499
1090.08	8825.7	5918.05	8580.35	7920.7	6930.33	7401.27	6304.61	4910.65	8579.48	6888.35		1090.08	4305.75	2338.12	3837.72	3320.76	2520.06	2733.74	2439.16	2138.94	3712.57	2622.21		18.168	2.04975	2.53112	2.23579	2.38521	2.75007	2.70738	2.58474	2.29584	2.31093	2.62693		18.168	2.44777	0.227466	0.0719311
1100.09	8655.19	5818.98	8375.67	7757.27	6750.56	7260.06	6169.25	4810.23	8391.5	6802.62		1100.09	4200.35	2238.38	3752.68	3261.49	2462.66	2719.21	2375.97	2081.04	3661.4	2546.78		18.3349	2.06059	2.59964	2.23192	2.37845	2.74117	2.66991	2.59652	2.31145	2.29188	2.67107		18.3349	2.45526	0.22952	0.0725806
1110.09	8424.18	5739.68	8339.68	7703	6706.55	7194.25	5980.71	4736.92	8137.31	6669.75		1110.09	4182.28	2236.49	3738.31	3240.08	2487.21	2677.4	2375.2	2077.17	3597.91	2526.22		18.5016	2.01426	2.56637	2.23087	2.37741	2.69641	2.68703	2.51799	2.28047	2.26168	2.64021		18.5016	2.42727	0.229359	0.0725295
1120.11	8451.18	5694.47	8195.76	7790.28	6635.29	7084.94	6005.44	4719.87	8241.34	6653.62		1120.11	4134.24	2212.17	3683.39	3239	2477.2	2704.21	2376.98	2056.51	3670	2522.13		18.6685	2.04419	2.57416	2.22506	2.40515	2.67855	2.61997	2.5265	2.29508	2.2456	2.6381		18.6685	2.42524	0.21466	0.0678815
1130.09	8944.09	6130.86	8787.69	8276.91	7000.98	7453.66	6389.2	5005.43	8673.59	7123.08		1130.09	4411.57	2409.25	3969.43	3504.44	2671.9	2860.51	2533.66	2223.37	3950.53	2693.83		18.8349	2.02742	2.54472	2.21384	2.36184	2.62023	2.60571	2.52173	2.25128	2.19555	2.64422		18.8349	2.39865	0.21732	0.0687225
1140.09	8961.1	6027.22	8720.79	8336.17	7067.6	7626.77	6408.41	5015.78	8685.08	7072.36		1140.09	4426.3	2409.04	3893.34	3501.45	2687.13	2910.11	2515.83	2221.53	3936.69	2741.23		19.0016	2.02451	2.50192	2.23992	2.38077	2.63017	2.62078	2.54723	2.25781	2.20619	2.58		19.0016	2.39893	0.208418	0.0659075
1150.09	8616.09	5796.06	8396.57	7990.45	6720.64	7136.11	6112.6	4764.22	8237.99	6772.67		1150.09	4148.51	2262.25	3740.11	3347.58	2469.27	2694.5	2361.01	2070.98	3672.36	2612.38		19.1682	2.07691	2.56208	2.24501	2.38693	2.72171	2.6484	2.58897	2.30046	2.24324	2.59253		19.1682	2.43662	0.21445	0.0678149
1160.09	8531.82	5742.03	8256.59	7953.44	6703.02	7286.03	6127.4	4751.72	8172.69	6779.39		1160.09	4137.02	2270.13	3760.16	3381.57	2470.44	2756.07	2373.66	2063.58	3627.17	2581.38		19.3349	2.06231	2.52938	2.19581	2.352	2.71329	2.64363	2.58141	2.30266	2.25319	2.62627		19.3349	2.426	0.221273	0.0699727
1170.11	8534.64	5778.69	8300.43	8020.31	6632.5	7218.94	6121.13	4730.32	8067.4	6739.9		1170.11	4184.08	2242.92	3724.03	3400.87	2507.47	2723.55	2392.37	2073.03	3574.38	2543.92		19.5018	2.03979	2.57641	2.22888	2.35832	2.64509	2.65056	2.5586	2.28184	2.257	2.64942		19.5018	2.42459	0.218701	0.0691594
1180.11	8494.69	5753.7	8229.07	7846.05	6620.64	7064.57	6112.74	4715.03	8099.67	6696.94		1180.11	4151.06	2224	3637.7	3302.74	2467.92	2667.22	2425.64	2049.79	3576.64	2548.22		19.6685	2.04639	2.5871	2.26216	2.37562	2.68268	2.64866	2.52005	2.30025	2.2646	2.62808		19.6685	2.43156	0.212431	0.0671766
1190.11	8255.75	5585.59	7801.84	7728.12	6417.52	6856.32	5958.22	4564.49	7858.59	6468.33		1190.11	4236.87	2255.9	3680.04	3363.78	2473.5	2680.75	2346.64	2075.21	3641.35	2558.88		19.8351	1.94855	2.476	2.12004	2.29745	2.59452	2.55761	2.53905	2.19953	2.15815	2.5278		19.8351	2.34187	0.226497	0.0716247
1200.09	8198.82	5470.98	7914.33	7688.91	6356.5	6893.91	5856.67	4541.74	7884.39	6429.62		1200.09	4235.71	2285.98	3734.6	3385.92	2462.02	2728.56	2384.1	2079.35	3580.64	2568.13		20.0016	1.93564	2.39328	2.11919	2.27085	2.58183	2.52657	2.45656	2.18422	2.20195	2.50361		20.0016	2.31737	0.208628	0.0659739
1210.09	8659.68	5806.58	8230.13	8183.93	6719.87	7232.6	6222.92	4793.47	8264.81	6812.18		1210.09	4209.67	2288.4	3651.31	3419.31	2509.95	2627.61	2414.67	2072.82	3646.62	2559.35		20.1682	2.05709	2.5374	2.25402	2.39345	2.67729	2.75254	2.57713	2.31253	2.26643	2.66168		20.1682	2.44896	0.226169	0.0715209
1220.09	8144.73	5476.89	7694.68	7692.85	6257.3	6767.77	5844.88	4476.48	7737.5	6315.02		1220.09	3795.14	2071.73	3358.47	3093.3	2216.13	2478.35	2209.35	1850.95	3296.58	2272.33		20.3349	2.14609	2.64363	2.29113	2.48694	2.82352	2.73076	2.64553	2.41848	2.34713	2.7791		20.3349	2.53123	0.227775	0.0720287
1230.11	8586.89	5834.89	8173.13	8075.31	6681.23	7239.91	6150.71	4752.29	8120.88	6742.4		1230.11	3917.29	2109.21	3390.35	3162.59	2310.96	2518.96	2235.45	1911.41	3375.38	2413.5		20.5018	2.19205	2.76638	2.41071	2.55339	2.89111	2.87417	2.75144	2.48628	2.40592	2.79362		20.5018	2.61251	0.236052	0.0746461
1240.11	8417.73	5682.36	8101.95	7829.74	6530.75	7061.47	6010.32	4616.72	7932.17	6506.14		1240.11	4030.82	2135.05	3493.92	3295.71	2380.27	2629.1	2339.03	1979.06	3444.96	2503.05		20.6685	2.08834	2.66146	2.31887	2.37574	2.7437	2.68589	2.56958	2.33279	2.30255	2.59929		20.6685	2.46782	0.213182	0.0674142
1250.09	8980.02	6048.4	8573.44	8297.22	6940.16	7520.63	6501.14	4947.17	8522.71	6915.48		1250.09	3936.61	2126.74	3397.92	3134.77	2361.57	2549.73	2257.68	1919.96	3440.01	2402.03		20.8349	2.28115	2.84397	2.52315	2.64684	2.9388	2.94958	2.87957	2.57671	2.47752	2.87901		20.8349	2.69963	0.230595	0.0729204
1260.09	8632.78	5827.3	8252.88	8012.68	6666.96	7176.86	6199.65	4755.03	8175.8	6716.82		1260.09	3744.68	2012.6	3276.64	3065.4	2214.19	2482.04	2220.29	1837.61	3293.69	2318.54		21.0016	2.30535	2.89541	2.5187	2.61391	3.01101	2.89151	2.79227	2.58761	2.48226	2.897		21.0016	2.6995	0.229731	0.0726472
1270.09	9020.54	6188.18	8688.7	8438.37	6972.73	7609.6	6539.83	4996.89	8622.76	7064.79		1270.09	3544.81	1872.17	3035.32	2928.85	2108.13	2290.64	2044.57	1720.59	3032.56	2159.2		21.1682	2.54472	3.30535	2.86253	2.88112	3.30755	3.32204	3.19864	2.90417	2.84339	3.27194		21.1682	3.04414	0.270695	0.0856011
1280.11	9136.99	6234.67	8740.79	8533.25	7008.45	7681.65	6594	5020.34	8730.99	7049.06		1280.11	3769.22	2052.27	3299.09	3133.91	2293.58	2483.47	2213.88	1875.55	3357.58	2320.47		21.3351	2.42411	3.03795	2.64945	2.72288	3.05568	3.09311	2.97848	2.67673	2.60038	3.03777		21.3351	2.82765	0.238885	0.0755421
1290.09	9181.66	6220.32	8769.52	8518.11	6986.94	7622.99	6539.48	5027.24	8715.75	7024.2		1290.09	3702.5	1992.46	3214.59	3013.95	2228.12	2491.78	2172.53	1828.34	3342.53	2288.49		21.5016	2.47985	3.12194	2.72804	2.82622	3.13581	3.05926	3.01007	2.74962	2.60753	3.06937		21.5016	2.87877	0.232429	0.0735006
1300.11	8534.94	5811.08	8248.16	8025.46	6536.51	7125.12	6057.95	4692.02	8125.08	6694.56		1300.11	3396.27	1823.76	2963.46	2801.9	2027.67	2267.4	1981.08	1654.05	3015.03	2072.33		21.6685	2.51303	3.18632	2.78328	2.86429	3.22366	3.14242	3.0579	2.83668	2.69486	3.23044		21.6685	2.95329	0.249881	0.0790193
1310.09	8693.63	5852.88	8338.79	8151.96	6648.26	7219.16	6251.29	4773.74	8255.1	6748.07		1310.09	3459.66	1843.02	3009.86	2837.46	2029.98	2256	2001.5	1676.8	3140.86	2109.1		21.8349	2.51286	3.1757	2.77049	2.87298	3.27503	3.19998	3.1233	2.84693	2.6283	3.19951		21.8349	2.96051	0.26949	0.0852201
1320.09	8776.05	5992.26	8418.04	8271.29	6787.78	7289.6	6427.62	4831.66	8523.23	6813.96		1320.09	3447.01	1826.77	3010.25	2892.66	2077.04	2289.69	2013.45	1692.33	3054.22	2133.9		22.0016	2.54598	3.28025	2.79645	2.8594	3.26801	3.18367	3.19233	2.85503	2.79064	3.19319		22.0016	2.9965	0.25614	0.0809984
1330.09	8727.48	5988.35	8466.61	8232.77	6786.83	7358.12	6341.68	4830.2	8515.53	6846.25		1330.09	3470.58	1867.76	3028.35	2832.92	2034.74	2221.9	2017.17	1677.52	3107.21	2129.23		22.1682	2.5147	3.20618	2.79578	2.90611	3.33548	3.31164	3.14385	2.87937	2.74057	3.21536		22.1682	3.0049	0.276265	0.0873628
1340.09	8921.71	6049.05	8627.25	8451.72	6812.28	7526.47	6587.61	4910.18	8658.44	6932.21		1340.09	3475.41	1887.85	3033.82	2912.61	2053.24	2361.96	2053.96	1694.27	3115.45	2179.89		22.3349	2.56709	3.2042	2.84369	2.90177	3.31782	3.18654	3.20727	2.89811	2.77919	3.18008		22.3349	3.00858	0.243307	0.0769403
1350.09	8985.08	6255.23	8615.38	8564.78	6813.71	7575.96	6523.03	4964.37	8714.96	7060.9		1350.09	3473.55	1877.46	3000.39	2842.66	2080.02	2283.52	2055.43	1704.57	3123.51	2186.66		22.5016	2.58671	3.33175	2.87142	3.01295	3.2758	3.31766	3.17356	2.91238	2.79012	3.22909		22.5016	3.05014	0.254672	0.0805344
1360.09	9053.19	6240.9	8708.72	8606.92	6862.43	7711.46	6566.59	4993.43	8657.58	7031.56		1360.09	3492.93	1867.18	3122.56	2933.86	2051.11	2323.34	2045.23	1714.71	3130.58	2187.33		22.6682	2.59186	3.34242	2.78897	2.93365	3.34572	3.31913	3.21069	2.91212	2.76549	3.21468		22.6682	3.04247	0.276745	0.0875146
1370.11	9092.61	6253.56	8765.14	8600.06	6937.42	7662.25	6591.98	5019.62	8887.18	7062.77		1370.11	3490.51	1863.64	3055.82	2910.07	2070.24	2350.81	2029.28	1700.94	3153.66	2153.75		22.8351	2.60496	3.35556	2.86834	2.95527	3.35101	3.25942	3.24843	2.95109	2.81806	3.27928		22.8351	3.06914	0.26241	0.0829813
1380.09	9034.94	6188.08	8761.22	8642.12	6906.01	7615.06	6554.44	4968.17	8825.81	7053.44		1380.09	3427.99	1864.36	2988.48	2928.95	2033.32	2318.61	1988.45	1681.74	3090.45	2098.88		23.0016	2.63564	3.31914	2.93167	2.95059	3.39642	3.28432	3.29626	2.95419	2.85583	3.36058		23.0016	3.09846	0.263192	0.0832287
1390.11	9054.98	6246.8	8705.01	8630.78	6883.85	7635.88	6633.79	4995.36	8872.44	7092.6		1390.11	3380.3	1816.64	3010.38	2877.67	1995.47	2321.55	1984.91	1663.07	3024.92	2145.56		23.1685	2.67875	3.43865	2.89166	2.99923	3.44974	3.28913	3.34212	3.0037	2.93311	3.30571		23.1685	3.13318	0.26475	0.0837215
1400.09	9029.47	6258.22	8811.86	8619.87	6944.67	7716.06	6582.67	5006.49	8908.58	7005.85		1400.09	3428.03	1856.61	3003.22	2844.8	2048.5	2286.22	2015.5	1675.87	3091.63	2117.93		23.3349	2.63401	3.37078	2.93414	3.03004	3.39012	3.37504	3.26603	2.9874	2.88151	3.30787		23.3349	3.11769	0.2605	0.0823775
1410.11	9042.49	6302.37	8815.08	8668.45	6882.27	7624.27	6604.3	5014.7	8935.47	7085.26		1410.11	3414	1864.02	3009.92	2831.68	2030.32	2346.24	2007.68	1667.47	3095.82	2151.13		23.5018	2.64865	3.38106	2.92867	3.06124	3.38974	3.24957	3.28952	3.00737	2.8863	3.29374		23.5018	3.11359	0.246249	0.0778706
1420.09	9042.09	6283.15	8759.56	8686.63	6860.14	7638.15	6557.58	5011.39	8924.4	7097.58		1420.09	3442.44	1858.9	3048.16	2876.34	2024.19	2320.25	2029.68	1676.72	3062.71	2111.89		23.6682	2.62665	3.38004	2.87372	3.02002	3.38908	3.29196	3.23085	2.98881	2.91389	3.36078		23.6682	3.10758	0.260778	0.0824654
1430.09	9148.99	6400.65	8937.4	8778.06	7025.58	7707.2	6630.79	5069.02	9057.42	7248.81		1430.09	3425.75	1816.57	2992.46	2877.47	2072.61	2340.46	2040.54	1689.74	3092.13	2159.93		23.8349	2.67065	3.52347	2.98664	3.05062	3.38972	3.29303	3.24953	2.99987	2.92919	3.35604		23.8349	3.14488	0.25973	0.0821339
1440.09	8972.77	6285.29	8727.46	8718.2	6852.04	7636.5	6602.81	5011.19	8938.85	7142.04		1440.09	3424.59	1848.35	2974.36	2897.74	1991.73	2316.01	2030.72	1680.45	3063.2	2135.86		24.0016	2.6201	3.40049	2.93423	3.00862	3.44025	3.29727	3.25146	2.98205	2.91814	3.34387		24.0016	3.11965	0.265967	0.0841063
1450.09	9011.03	6303.83	8698.76	8799.5	6854.75	7652.75	6565.71	5015.1	9008.7	7137		1450.09	3438.67	1852.96	2950.5	2914.79	2008.84	2299.48	1968.58	1671.85	3032.33	2141.69		24.1682	2.6205	3.40204	2.94823	3.01891	3.4123	3.32804	3.33526	2.99973	2.97089	3.33241		24.1682	3.13683	0.263061	0.0831873
1460.09	9080.83	6298.59	8817.59	8693.91	6893.07	7723.8	6505.37	5023.99	8932.99	7105.72		1460.09	3372.3	1812.98	2945.19	2871.11	1989.36	2289.8	1964.48	1653.6	2987.01	2134.76		24.3349	2.69277	3.47417	2.99389	3.02806	3.46497	3.37313	3.3115	3.03822	2.99061	3.32857		24.3349	3.16959	0.256994	0.0812687
1470.08	9010.13	6319.52	8728.3	8723.77	6910.18	7689.12	6527.86	5007.35	8992.03	7174.59		1470.08	3388.3	1811.55	2927.96	2771.89	1989.57	2341.88	1922.35	1650.08	3076.49	2116.52		24.5013	2.65919	3.48847	2.98102	3.14723	3.47321	3.28331	3.39577	3.03461	2.92282	3.3898		24.5013	3.17754	0.275177	0.0870186
1480.09	9086.28	6350.81	8850.87	8646.97	6874.05	7820.34	6614.42	5034.26	8957.11	7113.53		1480.09	3375.69	1851.06	2949.81	2821.65	1987.12	2359.21	2010.51	1664.83	3015.87	2130.41		24.6682	2.69168	3.4309	3.00049	3.0645	3.45931	3.31482	3.28992	3.02389	2.96999	3.33905		24.6682	3.15846	0.245938	0.0777725
1490.11	9062.2	6369.98	8863.43	8752.12	6983.06	7827.26	6700.16	5079.73	9102.52	7198.39		1490.11	3439.28	1868.34	2965.52	2876.47	1968.87	2343.93	2002.8	1681.65	3095.54	2166		24.8351	2.63491	3.40944	2.98883	3.04266	3.54674	3.33937	3.34539	3.02068	2.94053	3.32335		24.8351	3.15919	0.277163	0.0876466
1500.09	9321.98	6560.17	9059.74	8888.11	7161.58	8059.16	6831.32	5211.31	9261.19	7358.84		1500.09	3534.73	1909.8	3086.94	2957.84	2065.08	2394	2024.96	1732.77	3194.05	2171.63		25.0016	2.63725	3.435	2.93486	3.00493	3.46794	3.36641	3.37356	3.0075	2.89952	3.38862		25.0016	3.15156	0.288544	0.0912458
1510.09	9266.01	6486.35	8823.15	8708.44	7037.67	7932.16	6700.87	5144.85	9285.97	7355.72		1510.09	3489.11	1934.98	3024.63	2892.52	2033.12	2394.68	1985.59	1714.01	3149.06	2195.66		25.1682	2.6557	3.35216	2.9171	3.01067	3.46151	3.31241	3.37475	3.00164	2.94881	3.35012		25.1682	3.13849	0.265412	0.0839308
1520.09	9234.62	6488.89	8812.82	8798.9	7016.83	8031.24	6743.7	5149.85	9148.88	7377.2		1520.09	3463.55	1904.12	2970.12	2842.81	2010.6	2388.35	2041.63	1707.44	3097.56	2206.19		25.3349	2.66623	3.40781	2.96716	3.09514	3.48993	3.36267	3.3031	3.01612	2.95357	3.34386		25.3349	3.16056	0.261222	0.0826056
1530.09	9133.73	6367.68	8830.79	8652.12	6935.46	7847.42	6538.93	5076.47	8976.98	7207.19		1530.09	3434.69	1844.54	2946.11	2767.19	1962.03	2347.13	1973.71	1661.65	3021.53	2117.16		25.5016	2.65926	3.45217	2.99744	3.12668	3.53484	3.34341	3.31302	3.05507	2.97101	3.40419		25.5016	3.18571	0.270996	0.0856965
1540.09	9215.48	6432.99	8808.61	8546.04	6989.93	8004.33	6603.93	5109.28	9045.49	7277.91		1540.09	3436.91	1865.41	2979.87	2793.44	2008.99	2415.08	1981.31	1684.37	3054.17	2121.45		25.6682	2.68133	3.44856	2.95604	3.05932	3.47933	3.31431	3.33312	3.03335	2.96168	3.43063		25.6682	3.16977	0.268232	0.0848224
1550.09	9198.53	6501.78	8746.46	8495.46	7068.64	8004.84	6660.26	5102.71	9088.51	7240.16		1550.09	3429.44	1889.55	3010.38	2773.93	2019.93	2396.22	1947.43	1679.66	3136.92	2162.1		25.8349	2.68222	3.44091	2.90543	3.06261	3.49944	3.34062	3.42002	3.03795	2.89727	3.34867		25.8349	3.16352	0.28212	0.089214
1560.09	9203.08	6471.72	8882.76	8469.31	6949.44	7982.29	6533.13	5100.25	9065.74	7236.48		1560.09	3431.73	1842.49	3014.41	2789.45	2034.14	2382.78	1944.48	1687.8	3097.68	2132.55		26.0016	2.68176	3.51249	2.94676	3.0362	3.41641	3.34999	3.35984	3.02183	2.92662	3.39334		26.0016	3.16452	0.275547	0.0871356
1570.11	9165.03	6498.65	8910.58	8432.35	7051.24	7994.11	6717.18	5125.3	9062.34	7258.01		1570.11	3408.36	1884.69	3025.49	2733.57	2073.75	2410.12	2004.06	1686.28	3047.67	2122.82		26.1685	2.68898	3.44814	2.94517	3.08474	3.40024	3.31689	3.35179	3.03942	2.97353	3.41904		26.1685	3.16679	0.256419	0.0810868
1580.09	9169.82	6494.75	8916.66	8390.82	7098.57	8041.43	6656.04	5122.83	9152.13	7184.99		1580.09	3431.61	1853.1	3031.45	2700.09	2034.39	2404.47	1974.36	1682.17	3074.74	2117.7		26.3349	2.67216	3.50481	2.94138	3.10761	3.48929	3.34436	3.37124	3.04537	2.97655	3.39283		26.3349	3.18456	0.276774	0.0875236
1590.09	9112.9	6476	8854.25	8258.04	6959.98	7977.5	6542.51	5072.16	8927.71	7213.49		1590.09	3371.89	1853.57	2981.78	2660.32	2002.88	2346.65	1927.8	1661.92	3086.13	2145.39		26.5016	2.70261	3.4938	2.96945	3.10415	3.47498	3.39952	3.39376	3.05199	2.89285	3.36232		26.5016	3.18454	0.276733	0.0875107
1600.09	9182.22	6507.99	8907.82	8295.42	7167.77	8042.47	6626.13	5117.03	9055.94	7220.65		1600.09	3364.27	1867.66	2990.16	2674.83	2045.83	2379.99	2006.43	1672.04	3050.37	2123.95		26.6682	2.72934	3.48457	2.97905	3.10129	3.5036	3.3792	3.30245	3.06034	2.9688	3.39963		26.6682	3.19083	0.259874	0.0821795
1620.09	9089.12	6380.8	8847	8037.89	6995.95	7995.88	6473.6	5068.07	8944.9	7114.74		1620.09	3407.66	1875.77	2956.67	2579.75	2019.86	2360.96	1942.17	1660.54	3009.99	2146.65		27.0016	2.66726	3.40169	2.99221	3.11576	3.46359	3.3867	3.33318	3.05207	2.97173	3.31434		27.0016	3.16985	0.252721	0.0799175
1630.09	9130.75	6439.34	8880.24	8146.29	7019.51	7989.57	6612.1	5092.33	8966.7	7150.52		1630.09	3437.81	1873.84	2950.24	2620.76	2063.39	2406.53	1978.91	1676.74	3023.23	2099.12		27.1682	2.65598	3.43645	3.01001	3.10837	3.40194	3.31995	3.34128	3.03705	2.96593	3.40644		27.1682	3.16834	0.255043	0.0806517
1640.09	9329.9	6663.78	9075.51	8311.72	7335.87	8137.47	6738.32	5220.58	9207.74	7318		1640.09	3539.04	1962.48	3095	2710.28	2123.09	2466.46	2031.41	1739.78	3180.42	2213.34		27.3349	2.63628	3.3956	2.93232	3.06674	3.45528	3.29925	3.31706	3.00071	2.89513	3.30632		27.3349	3.13047	0.26453	0.0836519
1650.09	9181.24	6549.9	8930.25	8167.62	7195.82	8052.62	6736.84	5140.26	8968.13	7211.76		1650.09	3379.59	1927.85	3045.93	2650.2	2095.34	2443.53	1976.87	1693.03	3120.2	2097.51		27.5016	2.71667	3.39751	2.93186	3.08189	3.4342	3.29549	3.40783	3.03612	2.87422	3.43825		27.5016	3.1614	0.266768	0.0843594
1660.09	9215.7	6539.29	8930.38	8155.41	7225.96	7981.02	6646.55	5161.98	9146.46	7248.14		1660.09	3378.45	1918.23	3001.84	2678.37	2115.67	2435.81	2043.65	1701.77	3092.89	2154.95		27.6682	2.72779	3.40902	2.97497	3.04492	3.41545	3.27654	3.25229	3.0333	2.95726	3.36348		27.6682	3.1455	0.230966	0.0730379
1670.09	9310.54	6589.81	9008.3	8159.35	7337.15	8070.04	6807.84	5196.33	9257.42	7308.5		1670.09	3450.54	1900.53	2998.24	2728.65	2133.63	2464.61	2065.16	1718.54	3175.32	2143.07		27.8349	2.69828	3.46735	3.00453	2.99025	3.43881	3.27437	3.29653	3.02369	2.91543	3.41029		27.8349	3.15195	0.260445	0.08236
1680.09	9294.57	6611.84	8954.65	8278.1	7317.93	8100.83	6748.45	5200.79	9116.64	7356.92		1680.09	3454.39	1965.27	3050.37	2660.5	2124.95	2489.46	2052.21	1719.5	3127.39	2192.29		28.0016	2.69066	3.36434	2.93559	3.11148	3.44381	3.25406	3.28839	3.0246	2.9151	3.35581		28.0016	3.13838	0.243267	0.0769276
1690.09	9262.14	6563.1	8926.79	8212.37	7232.14	8002.9	6797.92	5199.7	9108.26	7376.06		1690.09	3499	1885.84	2986.36	2630.9	2081.03	2417.64	2036.16	1708.33	3130.99	2148.22		28.1682	2.64708	3.48021	2.98919	3.12151	3.47527	3.31022	3.33859	3.04373	2.90907	3.43356		28.1682	3.17484	0.278738	0.0881448
1700.11	9203.2	6575.85	8824.05	8258.02	7231.36	7887.67	6783.92	5149.53	9081.85	7293.07		1700.11	3594.78	1936.42	3133.4	2688.51	2143.75	2410.12	2067.3	1744.62	3181.9	2168.59		28.3351	2.56016	3.39588	2.81613	3.0716	3.37323	3.27273	3.28153	2.95167	2.85422	3.36304		28.3351	3.09402	0.288493	0.0912295
1710.09	9043.23	6539.18	8806.98	8223.69	7294.68	7968.05	6778.53	5127.35	9059.65	7378.15		1710.09	3646.41	2013.09	3198.09	2760.45	2184.62	2443.33	2114.39	1778.2	3217.93	2250.58		28.5016	2.48004	3.24833	2.75382	2.97911	3.3391	3.26115	3.2059	2.88346	2.81537	3.27834		28.5016	3.02446	0.28632	0.0905424
1720.09	8989.7	6485.68	8776.85	8249.97	7298.79	8061.62	6688.65	5106.04	8930.66	7328.94		1720.09	3766.38	2039	3332.13	2884.73	2302.22	2520.52	2223.16	1847.01	3363.38	2292.9		28.6682	2.38683	3.18081	2.634	2.85988	3.17032	3.19839	3.00862	2.76448	2.65526	3.19637		28.6682	2.9055	0.289496	0.0915467
1730.09	8811.74	6444.06	8636.35	8106.37	7185.53	7961.75	6707.76	5046.85	8858.9	7372.27		1730.09	3861.62	2152.54	3357.62	2893.9	2328.62	2623.52	2242.35	1889.56	3414.91	2386.96		28.8349	2.28187	2.9937	2.57216	2.80119	3.08574	3.03477	2.9914	2.67092	2.59418	3.08856		28.8349	2.81145	0.273306	0.0864269
1740.11	8847.89	6336.96	8544.11	8028.15	7147.95	7917.75	6651.88	5001.69	8718.62	7298.47		1740.11	3918.25	2211.19	3445.06	3032.32	2392.87	2681.33	2286.29	1953.55	3505.37	2457.75		29.0018	2.25812	2.86585	2.4801	2.64753	2.98719	2.95292	2.90947	2.56031	2.48722	2.96957		29.0018	2.71183	0.258253	0.0816668
1750.11	9189.96	6596.58	8967.24	8366.34	7432.86	8227.2	6878.48	5209.71	9140.23	7549.34		1750.11	4271.58	2393.41	3739.23	3299.37	2591.8	2916.36	2517.49	2143.29	3871.25	2666.1		29.1685	2.15142	2.75614	2.39815	2.53574	2.86783	2.82105	2.73228	2.43071	2.36106	2.8316		29.1685	2.5886	0.246456	0.0779362
1760.09	9127.98	6572.44	8866.54	8370.42	7349.52	8165.3	6851.79	5147.5	9073.47	7435.33		1760.09	4326.7	2480.09	3867.66	3389.65	2685.95	2989.59	2566.03	2200	3979.44	2817.5		29.3349	2.10969	2.65008	2.29248	2.4694	2.73628	2.73125	2.67019	2.33978	2.28009	2.63898		29.3349	2.49182	0.223561	0.0706963
1770.09	9057.26	6465.98	8695.77	8231.45	7323.47	8036.8	6732.85	5077.76	9065.23	7420.88		1770.09	4413.95	2529.7	3827.94	3485.08	2753.28	3074.98	2639.73	2241.06	3966.06	2788.41		29.5016	2.05196	2.55602	2.27166	2.36191	2.6599	2.61361	2.55059	2.26578	2.2857	2.66133		29.5016	2.42785	0.208398	0.0659014
1780.09	8980.15	6375.17	8631.91	8055.98	7156.67	8003.96	6641	5030.94	9010.66	7336.93		1780.09	4495.96	2561.21	4028.82	3531.32	2825.96	3172.64	2681.68	2289.36	4107.86	2848.21		29.6682	1.99738	2.48913	2.14254	2.2813	2.53248	2.52281	2.47643	2.19753	2.19352	2.57598		29.6682	2.34091	0.202368	0.0639944
1790.08	8826.53	6306.8	8550.38	8012.26	7205.91	7933.27	6513.83	4983.93	8992.43	7337.04		1790.08	4511.07	2571.05	3991.64	3551.54	2827.57	3152.37	2745.6	2315	4090.13	2946.3		29.8346	1.95664	2.453	2.14207	2.25599	2.54844	2.51661	2.37246	2.15288	2.19857	2.49026		29.8346	2.30869	0.197049	0.0623123
1800.09	8774.61	6203.05	8491.89	7885.13	7030.41	7849.4	6496.06	4902.97	8750.38	7222.68		1800.09	4524.49	2569.36	3992.04	3615.26	2839.05	3160.2	2729.97	2331.58	4128.52	2918.75		30.0016	1.93936	2.41424	2.1272	2.18107	2.47632	2.48383	2.37953	2.10285	2.1195	2.47458		30.0016	2.26985	0.197529	0.0624643
1810.09	8685.34	6083.08	8335.81	7681.58	6889.44	7713.04	6294.72	4843.13	8653.51	7036.33		1810.09	4524	2637.42	3985.66	3589.26	2889.37	3189.24	2737.53	2330.42	4208.87	2922.81		30.1682	1.91984	2.30645	2.09145	2.14016	2.38441	2.41846	2.29941	2.07822	2.05602	2.40739		30.1682	2.21018	0.17459	0.0552103
1820.09	8450.45	5901.61	8144.22	7504.54	6853.79	7485.37	6187.81	4701.66	8545.63	6867.47		1820.09	4472.04	2595.13	3926.19	3527.72	2832.87	3176	2665.06	2300.4	4139.71	2902.58		30.3349	1.88962	2.27411	2.07433	2.12731	2.41938	2.35685	2.32183	2.04385	2.0643	2.36599		30.3349	2.19376	0.17652	0.0558206
1830.09	7983.01	5611.2	7647.8	7027.93	6385.33	7155.71	5846.77	4424.8	8014.44	6540.85		1830.09	4221.13	2428.25	3774.63	3311.54	2664.89	2949.75	2529.42	2167.72	3961.85	2750.48		30.5016	1.8912	2.3108	2.02611	2.12226	2.3961	2.42587	2.31151	2.04122	2.0229	2.37807		30.5016	2.1926	0.192514	0.0608783
1840.11	7883.95	5599.94	7634.55	7025.49	6460.35	7125.64	5802.13	4424.96	8054.69	6445.79		1840.11	4290.82	2487.98	3747.26	3358.36	2664.88	2990.41	2537.2	2186.17	3987.21	2798.03		30.6685	1.8374	2.2508	2.03737	2.09194	2.42425	2.38283	2.28682	2.02407	2.02013	2.30368		30.6685	2.16593	0.190289	0.0601747
1850.09	7957.6	5555.37	7652.15	7039.1	6447.14	7215.48	5789.54	4440.16	7976.79	6502.24		1850.09	4356.26	2534.89	3866.31	3436.35	2705.98	3014.96	2636.33	2223.41	4053.64	2780.95		30.8349	1.8267	2.19157	1.97919	2.04842	2.38255	2.39323	2.19606	1.997	1.96781	2.33813		30.8349	2.13207	0.197169	0.0623504
1860.09	7861.39	5560.73	7622.82	6976.53	6377.39	7040.95	5800.97	4407.34	8096.31	6432.23		1860.09	4360.39	2501.65	3887	3431.99	2695.14	3032.33	2605.61	2229.76	4128	2764.32		31.0016	1.80291	2.22283	1.9611	2.03279	2.36625	2.32196	2.22634	1.97659	1.96132	2.32688		31.0016	2.1199	0.195861	0.0619368
1870.09	7949.76	5623.14	7695.79	7095.76	6382.45	7103.13	5795.7	4431.72	8215.91	6511.26		1870.09	4461.24	2577.45	3969.81	3495.4	2787.81	3094.81	2658.52	2277.98	4196.32	2914.73		31.1682	1.78196	2.18166	1.93858	2.03003	2.28942	2.29518	2.18005	1.94546	1.95788	2.23391		31.1682	2.08341	0.175883	0.0556192
1880.09	8004.99	5543.92	7617.45	7099.81	6460.51	6991.59	5836.06	4455.35	8212.39	6590.32		1880.09	4491.77	2602.24	4041.74	3552.07	2837.04	3072.26	2699.06	2316.91	4301.64	2947.49		31.3349	1.78215	2.13044	1.8847	1.99878	2.2772	2.27572	2.16226	1.92297	1.90913	2.23591		31.3349	2.05793	0.180509	0.0570819
1890.09	7992.57	5559.76	7688.1	7115.55	6475.31	7002.26	5895.6	4472.86	8384.93	6544.05		1890.09	4537.74	2634.15	4060.71	3605.24	2879.76	3169.66	2727.92	2337.13	4334.35	2963.54		31.5016	1.76135	2.11064	1.89329	1.97367	2.24856	2.20915	2.16121	1.91382	1.93453	2.20818		31.5016	2.04144	0.166889	0.052775
1900.09	7931.25	5637.4	7725.37	7101.43	6401.17	7031.92	5818.22	4455.31	8281.61	6501.53		1900.09	4604.7	2687.07	4105.22	3728.83	2908.94	3178.78	2717.22	2366.85	4308.61	2956.93		31.6682	1.72242	2.09798	1.88184	1.90447	2.20052	2.21215	2.14124	1.88238	1.92211	2.19874		31.6682	2.01638	0.173723	0.054936
1910.09	8075.7	5719.75	7837.92	7374.32	6580.96	7046.17	5945.3	4537.19	8484.44	6609.1		1910.09	4691.27	2745.22	4198.19	3745.12	2968.16	3153.89	2849.15	2421.88	4496.11	3013.26		31.8349	1.72143	2.08353	1.86698	1.96905	2.21718	2.23412	2.08669	1.87341	1.88706	2.19334		31.8349	2.01328	0.175475	0.0554899
1920.09	8187.93	5777.27	7897.1	7217.19	6534.08	6974.94	5944.13	4546.85	8465.09	6688.46		1920.09	4998.23	2914.12	4493.53	3990.52	3169.4	3410.25	2951.13	2581.32	4756.67	3246.22		32.0016	1.63816	1.98251	1.75744	1.80858	2.06161	2.04529	2.01419	1.76144	1.77963	2.06038		32.0016	1.89092	0.157375	0.0497662
1930.11	8322.97	5860.14	8022.36	7452.29	6731.02	7088.77	6110.84	4637.59	8672.81	6795.32		1930.11	4911.37	2883.47	4411.73	3897.84	3096.09	3240.03	2950.79	2534.13	4572.65	3174.03		32.1685	1.69463	2.03233	1.81842	1.9119	2.17404	2.18787	2.07092	1.83006	1.89667	2.14091		32.1685	1.97577	0.169703	0.0536647
1940.09	8200.81	5763.33	7942.98	7367.9	6699.73	7163.45	6083.74	4589.92	8532.5	6736.08		1940.09	4818.63	2844.3	4298.49	3838.42	3061.53	3217.05	2958.03	2485.21	4482.67	3161.63		32.3349	1.7019	2.02628	1.84785	1.91951	2.18836	2.22671	2.05669	1.8469	1.90344	2.13057		32.3349	1.98482	0.168913	0.0534149
1950.09	7756.19	5484.24	7641.91	6955.88	6344.57	6748.77	5760.28	4349.64	8056.35	6386.29		1950.09	4631.27	2729.18	4177.24	3628.65	2936.27	3082.12	2820.22	2366.31	4398.56	2976.77		32.5016	1.67474	2.00948	1.82942	1.91694	2.16076	2.18965	2.0425	1.83815	1.83159	2.14538		32.5016	1.96386	0.172604	0.0545821
1960.09	7835.88	5530.29	7628.69	6905.73	6330.83	6647.47	5843.98	4359.84	8116.22	6351.44		1960.09	4597.87	2744.29	4145.33	3574.94	2890.99	3096.03	2818.52	2350.52	4335.93	2943.85		32.6682	1.70424	2.0152	1.84031	1.9317	2.18985	2.1471	2.07342	1.85484	1.87185	2.15753		32.6682	1.9786	0.162846	0.0514965
1970.09	7728.59	5530.18	7549.41	6911.54	6306.15	6679.1	5802.83	4326.07	8092.66	6344.8		1970.09	4598.77	2681.4	4190.47	3620.77	2889.96	3088.87	2790.38	2355.48	4352.5	2962.78		32.8349	1.68058	2.06242	1.80157	1.90886	2.18209	2.16232	2.07959	1.8366	1.85931	2.1415		32.8349	1.97148	0.175698	0.0555607
1980.09	7702.92	5517.66	7628.79	6978.35	6291.56	6631.97	5809.75	4330.92	8187.16	6349.92		1980.09	4609.8	2709.6	4168.24	3663.48	2873.73	3108.86	2798.74	2373.5	4393.8	2991.18		33.0016	1.67099	2.03634	1.83022	1.90484	2.18934	2.13325	2.07585	1.8247	1.86334	2.12288		33.0016	1.96517	0.1697	0.0536638
1990.09	7724.85	5575.44	7667.37	6969.47	6317.83	6608.21	5879.24	4341.16	8334.18	6315.43		1990.09	4612.83	2723.11	4210.19	3678	2944.83	3080.66	2821.72	2374.18	4453.75	3016.42		33.1682	1.67464	2.04745	1.82115	1.89491	2.14539	2.14506	2.08356	1.82848	1.87127	2.09368		33.1682	1.96056	0.163135	0.0515879
2000.09	7762.41	5591.24	7640.32	7016.29	6341.27	6648.3	5851.41	4349.13	8220.1	6327.2		2000.09	4650.83	2732.3	4180.69	3717.59	2917.6	3114.73	2899.24	2389.83	4491.29	3046.55		33.3349	1.66904	2.04635	1.82753	1.88732	2.17345	2.13447	2.01825	1.81985	1.83023	2.07684		33.3349	1.94833	0.164357	0.0519742
2010.11	7680.52	5609.01	7715.93	6950.46	6334.74	6602.25	5822.53	4338.94	8227.86	6314.11		2010.11	4695.36	2749.51	4215.16	3716.66	2931.72	3035.9	2826.13	2393.87	4529.52	3029.91		33.5018	1.63577	2.04	1.83052	1.87008	2.16076	2.17473	2.06025	1.81252	1.8165	2.08392		33.5018	1.9485	0.179263	0.0566881
2020.09	7742.32	5562.43	7625.27	6946.98	6345.98	6578.05	5856.24	4352.23	8245.92	6385.6		2020.09	4629.32	2806.62	4211.09	3696.42	2923.93	3093.05	2866.23	2391.53	4509.02	2975.28		33.6682	1.67245	1.9819	1.81076	1.87938	2.17036	2.12672	2.04318	1.81985	1.82876	2.14622		33.6682	1.94796	0.170292	0.0538509
2030.11	7696.61	5608.51	7574.24	6859.73	6271.96	6622.39	5803.38	4316.34	8210.28	6336.65		2030.11	4683.3	2791.51	4249.03	3695.8	2885.08	3107.69	2846.8	2389.07	4530.67	2992.76		33.8351	1.64342	2.00913	1.78258	1.85609	2.17393	2.13097	2.03856	1.80671	1.81215	2.11732		33.8351	1.93709	0.179796	0.0568565
2040.09	7715.57	5559.96	7520.22	6803.56	6218.96	6568.5	5784.39	4299.87	8121.3	6214.58		2040.09	4620.55	2792.86	4152.53	3636.25	2861.05	3061.71	2809.93	2365.18	4554.89	2975.67		34.0016	1.66984	1.99077	1.811	1.87104	2.17367	2.14537	2.05855	1.81799	1.78298	2.08846		34.0016	1.94097	0.173002	0.0547081
2050.09	7619.82	5525.93	7505.14	6831.63	6220.76	6594.56	5831.65	4299.89	8022.57	6244.44		2050.09	4654.2	2823.28	4189.04	3628.41	2901.54	3059.38	2837.41	2377.27	4517.53	2986.4		34.1682	1.63719	1.95727	1.79161	1.88282	2.14395	2.15552	2.05527	1.80875	1.77587	2.09096		34.1682	1.92992	0.177812	0.0562289
2060.09	7579.72	5504.73	7504.01	6795.56	6205.29	6503.8	5820.09	4269.95	8192.95	6253.91		2060.09	4648.1	2737.17	4242.21	3618.44	2821.81	3073.69	2821.06	2356.43	4559.04	3027.41		34.3349	1.63071	2.0111	1.76889	1.87804	2.19905	2.11596	2.06308	1.81204	1.79708	2.06576		34.3349	1.93417	0.182368	0.0576698
2070.11	7611.24	5586.25	7501.64	6854.54	6226.87	6469.62	5694.2	4282.25	8104.08	6228.46		2070.11	4638.94	2781.63	4161.34	3685.58	2886.58	3101.32	2834.31	2381.65	4608.71	2975.5		34.5018	1.64073	2.00826	1.8027	1.85983	2.15718	2.08609	2.00903	1.79802	1.75843	2.09325		34.5018	1.92135	0.171888	0.0543558
2080.09	7600.99	5558.75	7588.75	6763.69	6182.35	6466.44	5729.23	4288.54	8283.16	6148.64		2080.09	4686.22	2776.19	4190.65	3639.8	2916.66	3064.09	2839.99	2389.69	4592.17	2956.62		34.6682	1.62199	2.0023	1.81088	1.85826	2.11967	2.1104	2.01734	1.7946	1.80376	2.07962		34.6682	1.92188	0.167192	0.0528708
2090.11	7616.23	5610.84	7549.95	6926.19	6287.1	6597.71	5685.54	4311.12	8335.65	6217.08		2090.11	4737.45	2771.12	4224.33	3667.53	2908.52	3048.43	2806.24	2387.98	4603.76	2936.5		34.8351	1.60766	2.02476	1.78725	1.88852	2.16161	2.1643	2.02603	1.80534	1.81062	2.11718		34.8351	1.93933	0.187586	0.05932
2100.09	7607.49	5654.69	7477.25	6782.95	6254.45	6522.51	5739.1	4301.77	8389.22	6186.96		2100.09	4713.42	2760.32	4291.45	3678.91	2880.99	3113.17	2809.47	2403.25	4592.04	2947.52		35.0016	1.61401	2.04856	1.74236	1.84374	2.17094	2.09514	2.04277	1.78998	1.82691	2.09904		35.0016	1.92734	0.186588	0.0590042
2110.09	7557.24	5612.19	7457.1	6779.76	6213.18	6435.84	5690.23	4280.13	8202.82	6201.82		2110.09	4618.67	2783.83	4156.54	3683.42	2859.89	3039.07	2784.8	2367.58	4513.67	2913.5		35.1682	1.63624	2.016	1.79406	1.84062	2.17253	2.1177	2.04332	1.80781	1.81733	2.12865		35.1682	1.93742	0.180612	0.0571147
2120.09	7655.08	5676.89	7467.26	6775.13	6279.82	6558.75	5757.41	4338.16	8391.05	6268.63		2120.09	4638.53	2784.12	4154.13	3659.43	2889.44	3094.46	2774.98	2384.8	4560.44	2933.21		35.3349	1.65032	2.03902	1.79755	1.85141	2.17337	2.11952	2.07476	1.81909	1.83997	2.13712		35.3349	1.95021	0.179241	0.056681
2130.09	7770.02	5806.09	7720.91	6950.99	6381.06	6664.68	5789.17	4394.58	8487.67	6315.8		2130.09	4611.12	2795.77	4239.42	3676.05	2908.27	3098.61	2806.61	2390.25	4578.98	2957		35.5016	1.68506	2.07674	1.82122	1.89089	2.19411	2.15086	2.06269	1.83854	1.85361	2.13588		35.5016	1.97096	0.173474	0.0548573
2140.11	7769.81	5879.28	7775.08	6981.47	6503.53	6752.22	5861.02	4437.85	8650.5	6392.73		2140.11	4634.86	2801.25	4252.23	3611.92	2905.16	3089.64	2831.72	2380.77	4589.19	2976.36		35.6685	1.67638	2.09881	1.82847	1.9329	2.23861	2.18544	2.06978	1.86404	1.88497	2.14784		35.6685	1.99272	0.181858	0.0575084
2150.11	7882.34	5917.91	7769.24	7043.09	6469.35	6791.2	5908.93	4472.39	8646.44	6375.07		2150.11	4634.4	2818.83	4189.23	3615.64	2890.54	3094.68	2795.14	2387.32	4647.87	3027.68		35.8351	1.70083	2.09942	1.85458	1.94795	2.23811	2.19447	2.114	1.8734	1.8603	2.10559		35.8351	1.99887	0.175574	0.0555214
2160.11	7913.12	5921.06	7837.63	7054.33	6477.7	6756.73	5915.42	4474.92	8583.27	6424.97		2160.11	4633.57	2807.26	4215.75	3618.72	2884.78	3084.85	2799.19	2382.66	4538.13	2987.89		36.0018	1.70778	2.10919	1.85913	1.9494	2.24548	2.1903	2.11326	1.87812	1.89137	2.15034		36.0018	2.00944	0.175558	0.0555162
2170.09	7920.43	5970.16	7892.55	7067.34	6467.32	6830.22	5978.34	4492.42	8664.57	6438.77		2170.09	4584.44	2770.5	4258.37	3566.8	2875.96	3078.34	2768.34	2372.19	4563.56	2962.25		36.1682	1.72768	2.1549	1.85342	1.98142	2.24875	2.2188	2.15954	1.89378	1.89864	2.17361		36.1682	2.03105	0.181732	0.0574686
2180.09	7969.34	6076.27	7996.18	7203.88	6568.06	6753.93	5943.07	4534.05	8678.84	6554.34		2180.09	4647.7	2791.23	4265.56	3591.33	2882.79	3112.6	2714.73	2388.38	4575.57	2985.95		36.3349	1.71468	2.17691	1.87459	2.00591	2.27837	2.16987	2.1892	1.89838	1.89678	2.19506		36.3349	2.03998	0.186684	0.0590347
2190.11	7988.9	6075.62	7959.36	7144.12	6582.44	6872.18	5967.47	4539.08	8846.27	6604.93		2190.11	4528.02	2757.55	4094.01	3564.25	2865.2	3068.62	2798.29	2354.54	4577.68	2990.99		36.5018	1.76433	2.20327	1.94415	2.00438	2.29737	2.2395	2.13254	1.9278	1.93248	2.20827		36.5018	2.06541	0.174395	0.0551486
2200.09	8082.12	6101.53	8100.06	7213.2	6614.75	6827.27	6028.11	4584.38	8883.41	6615.65		2200.09	4582.45	2783.21	4192.24	3588.74	2865.16	3084.54	2729.61	2371.23	4621.44	3009.25		36.6682	1.76371	2.19226	1.93216	2.00995	2.30869	2.21338	2.20841	1.93334	1.92222	2.19844		36.6682	2.06826	0.177962	0.0562766
2210.09	8170.03	6155.2	8141.3	7308.95	6684.47	6887.98	6017.32	4623.62	8998.34	6703		2210.09	4575.19	2763.79	4140.49	3566.25	2842.66	3106.35	2751.31	2368.57	4537.63	2989.2		36.8349	1.78572	2.22709	1.96626	2.04948	2.35148	2.21738	2.18708	1.95207	1.98305	2.24241		36.8349	2.0962	0.175011	0.0553435
2220.09	8302.64	6330.93	8288.09	7412.51	6834.07	7043.81	6125.24	4689.38	9060.04	6781		2220.09	4570.6	2695.2	4133.2	3609.93	2866.38	3126.08	2737.67	2370.45	4546.16	3026.79		37.0016	1.81653	2.34896	2.00525	2.05337	2.38421	2.25324	2.23739	1.97827	1.9929	2.24033		37.0016	2.13104	0.186479	0.0589697
2230.09	8234.78	6240.93	8363.32	7428.58	6787.6	6913.67	6121.43	4694.53	9155.87	6789.1		2230.09	4621.45	2716.21	4069.63	3633.46	2820.43	3080.4	2794.55	2361.89	4516.64	3031.18		37.1682	1.78186	2.29766	2.05506	2.04449	2.40658	2.24441	2.19049	1.98761	2.02714	2.23976		37.1682	2.12751	0.182063	0.0575734
2240.09	8234.71	6272.22	8414.5	7508.97	6906.78	6962.92	6179.88	4707.52	9136.22	6779.74		2240.09	4562.14	2665.68	4034.02	3556.24	2774.28	3011.25	2745.29	2342.95	4518.09	3043.31		37.3349	1.80501	2.35295	2.08589	2.11149	2.48958	2.3123	2.25108	2.00923	2.02214	2.22775		37.3349	2.16674	0.199188	0.0629886
2250.09	8371.52	6372	8607.97	7672.62	6990.64	7086.57	6224.02	4781.41	9278.72	6891.71		2250.09	4534.05	2673.98	4036.27	3570.46	2770.13	3091.53	2694.78	2338.36	4469.42	3045.2		37.5016	1.84637	2.38297	2.13266	2.14892	2.52358	2.29225	2.30966	2.04477	2.07604	2.26314		37.5016	2.20204	0.192736	0.0609484
2260.11	8345.62	6361.43	8643.87	7662.56	6952.3	7137.96	6346.86	4805.83	9372.1	6891.18		2260.11	4502.9	2631.61	3998.79	3464.52	2740.19	3030.06	2703.14	2309.96	4393.83	2997.38		37.6685	1.85339	2.41731	2.16162	2.21172	2.53716	2.35572	2.34796	2.08049	2.13301	2.29907		37.6685	2.23974	0.194816	0.0616062
2270.09	8456.43	6437.23	8596.75	7779.35	7109.8	7162.35	6395.44	4847.02	9384.48	6916.45		2270.09	4450.16	2531.07	3913.51	3474.83	2702.23	3012.97	2696.99	2294.6	4297.64	3009.02		37.8349	1.90025	2.54328	2.19668	2.23877	2.63109	2.37717	2.37133	2.11235	2.18363	2.29857		37.8349	2.28531	0.210993	0.0667219
2280.11	8413.58	6532.34	8734.87	7744.45	7144.66	7056.77	6368.87	4852.3	9388.81	7000.93		2280.11	4399.23	2570.47	3872.98	3462.99	2689.73	3002.85	2662.98	2264.78	4314.81	2912.16		38.0018	1.91251	2.5413	2.25534	2.23635	2.65628	2.35002	2.39164	2.1425	2.17595	2.40403		38.0018	2.30659	0.211564	0.0669023
2290.11	8575.88	6567.08	8766.46	7850.75	7155.42	7135.17	6400.34	4876.85	9493.34	6944.51		2290.11	4299.67	2492.93	3821.18	3368.69	2635.76	2978.91	2650.04	2229.67	4249.06	2966.1		38.1685	1.99454	2.63428	2.29418	2.33051	2.71475	2.39523	2.41518	2.18725	2.23422	2.34129		38.1685	2.35414	0.208112	0.0658108
2300.09	8535.1	6579.82	8858.53	7841.93	7192.21	7130.13	6446.9	4882.91	9495.14	6970.57		2300.09	4235.89	2508.05	3776.49	3299.78	2619.53	2975.06	2657.78	2204.92	4177.06	2923.13		38.3349	2.01495	2.62348	2.3457	2.3765	2.74561	2.39663	2.42567	2.21455	2.27316	2.38463		38.3349	2.38009	0.202369	0.0639948
2310.09	8597.94	6599.21	8875.86	7896.67	7194.38	7198.73	6417.01	4914.12	9515.38	6992.53		2310.09	4168.63	2422.05	3741.24	3258.96	2552.89	2899.55	2546.89	2154.89	4142.18	2826.29		38.5016	2.06254	2.72464	2.37243	2.42306	2.81814	2.4827	2.51954	2.28045	2.29719	2.4741		38.5016	2.44548	0.217614	0.0688156
2320.09	8678.97	6630.73	8913.72	8053.06	7261.19	7276.55	6545.46	4963.12	9581.28	6986.65		2320.09	4182.54	2439.06	3703.95	3276.01	2571.99	2868.57	2581.07	2148.07	4171.1	2826		38.6682	2.07505	2.71855	2.40655	2.45819	2.82318	2.53665	2.53595	2.3105	2.29706	2.47227		38.6682	2.46339	0.213535	0.0675255
2330.11	8726.22	6683.16	8995.3	8052.64	7187.92	7372.25	6530.24	4992.62	9577.06	7103.09		2330.11	4093.44	2389.36	3695.57	3239.07	2519.69	2840.42	2508.92	2109.7	4115.98	2796.74		38.8351	2.13176	2.79705	2.43408	2.4861	2.85271	2.59548	2.60281	2.36651	2.3268	2.53978		38.8351	2.51331	0.21605	0.0683209
2340.09	8909.88	6764.57	9162.07	8177.69	7309.77	7337.41	6674.27	5046.64	9715.4	7176.6		2340.09	4063.62	2350.76	3625.3	3214.51	2529.37	2855.71	2481.15	2094.09	4151.05	2764.16		39.0016	2.1926	2.87761	2.52726	2.54399	2.88995	2.56938	2.68999	2.40994	2.34047	2.5963		39.0016	2.56375	0.219832	0.0695168
2350.09	8868.76	6731.52	9084.04	8232.64	7361.42	7341.53	6692.8	5076.61	9783.68	7287.11		2350.09	4002	2366.56	3616.03	3095.15	2496.5	2831.91	2437.32	2081.37	4004.51	2763.59		39.1682	2.21608	2.84444	2.51216	2.65985	2.94869	2.59243	2.74596	2.43907	2.44316	2.63682		39.1682	2.60387	0.214239	0.0677485
2360.09	8939.47	6815.33	9134.27	8191.03	7416.33	7395.83	6749.04	5076.01	9748.17	7303.13		2360.09	3996.13	2362.13	3573.73	3156.34	2427.49	2750.89	2452.06	2050.39	3980.23	2730		39.3349	2.23703	2.88525	2.55594	2.59511	3.05514	2.68852	2.75239	2.47563	2.44915	2.67514		39.3349	2.63693	0.231786	0.0732971
2370.09	9027.8	6822.32	9392.85	8261.98	7457.63	7517.61	6802.81	5125.73	9865.66	7302.79		2370.09	3968.51	2278.25	3588.52	3079.57	2435.37	2754.62	2471.97	2032.69	3983.73	2707.74		39.5016	2.27486	2.99455	2.61747	2.68283	3.06222	2.72909	2.75198	2.52165	2.47649	2.69701		39.5016	2.68081	0.232726	0.0735945
2380.09	9070.09	6874.33	9405.7	8325.05	7536.35	7523.01	6799.38	5163.15	9889.23	7384.95		2380.09	3947.36	2261.29	3575.01	3125.78	2425.01	2686.59	2395.62	2023.6	4062.55	2677.64		39.6682	2.29776	3.04001	2.63096	2.66335	3.10776	2.80021	2.83826	2.55147	2.43424	2.75801		39.6682	2.7122	0.252433	0.0798262
2390.11	9148.03	6884.82	9370.38	8468.03	7574.82	7624.44	6884	5200.03	10069.1	7488.97		2390.11	3908.42	2239.55	3565.28	3125.48	2445.92	2707.03	2414.56	2018.84	4046.87	2678.11		39.8351	2.3406	3.07421	2.62823	2.70935	3.09692	2.81653	2.85104	2.57575	2.48813	2.79636		39.8351	2.73771	0.241239	0.0762866
2400.09	9193.71	6900.64	9381.21	8448.32	7506.24	7580.23	6965.79	5208.18	9970.93	7508.63		2400.09	3872.39	2196.48	3518.94	3020.41	2384.32	2655.53	2380.59	1986.49	3924.01	2652.43		40.0016	2.37417	3.14168	2.66592	2.79708	3.14817	2.85451	2.92608	2.6218	2.54101	2.83085		40.0016	2.79013	0.24832	0.0785258
2410.09	9191.3	6886.88	9436.32	8388.21	7504.16	7715.21	6949	5232.86	9998.62	7571.76		2410.09	3818.29	2207.78	3472.22	3022.5	2366.9	2622.3	2390.3	1968.34	3879.5	2605.7		40.1682	2.40718	3.11937	2.71766	2.77525	3.17046	2.94215	2.90717	2.65852	2.5773	2.90584		40.1682	2.81809	0.23809	0.0752905
2420.11	9239.4	6916.78	9489.3	8446.02	7563.68	7643.66	6953.54	5240.92	10074.3	7549.45		2420.11	3776.26	2234.66	3509.71	2952.43	2377.59	2620.25	2355.59	1957.54	3870.11	2591.87		40.3351	2.44671	3.09522	2.70373	2.8607	3.18123	2.91715	2.95193	2.67729	2.6031	2.91274		40.3351	2.83498	0.226415	0.0715986
2430.09	9304.26	6911.11	9492.23	8371.22	7502.6	7626.68	6960.27	5243.18	10016.8	7573.53		2430.09	3831.62	2161.58	3561.92	2952.27	2364.56	2591.61	2288.59	1945.82	3891.49	2542.61		40.5016	2.42828	3.19725	2.66492	2.83552	3.17294	2.94284	3.0413	2.69458	2.57402	2.97865		40.5016	2.85303	0.258019	0.0815929
2440.09	9305.69	6869.35	9683.54	8424.39	7515.65	7700.06	7055.87	5278.37	10010.6	7691.3		2440.09	3754.18	2185.28	3522.9	2916.39	2344.82	2603.39	2337.1	1929.91	3832.81	2536.4		40.6682	2.47875	3.14346	2.74874	2.88863	3.20522	2.9577	3.01907	2.73503	2.61181	3.03237		40.6682	2.88208	0.234515	0.0741602
2450.09	9365.25	6945.38	9639.96	8456.48	7543.06	7710.93	7044.41	5296.78	9995.31	7646.16		2450.09	3752.94	2190.34	3493.11	2903.98	2348.15	2569.02	2309.51	1929.82	3823.82	2529.85		40.8349	2.49544	3.17091	2.75971	2.91203	3.21235	3.00151	3.05018	2.74471	2.61396	3.02238		40.8349	2.89832	0.237625	0.0751437
2460.09	9455.14	7008.95	9693.17	8466.03	7585.81	7766.87	7072.83	5337.6	10168.2	7781.88		2460.09	3773.69	2179.44	3533.73	2994.76	2387.9	2554.55	2285.03	1942.84	3871.53	2585.74		41.0016	2.50554	3.21594	2.74305	2.82695	3.17677	3.04041	3.09529	2.74732	2.6264	3.00954		41.0016	2.89872	0.242668	0.0767384
2470.11	9510.77	7052.97	9858.77	8608.4	7638.8	7842.64	7171.95	5363.96	10128.2	7720.68		2470.11	3773	2188.7	3511.31	2938.57	2375.52	2613.92	2362.67	1930.82	3798.51	2556.61		41.1685	2.52074	3.22244	2.80772	2.92945	3.21563	3.00034	3.03553	2.77807	2.66636	3.01989		41.1685	2.91962	0.227359	0.0718974
2480.09	9533.79	7070.95	9894.59	8648.26	7704.37	7924.53	7123.44	5404.84	10272.4	7725.2		2480.09	3744.27	2200.01	3452.17	2944.58	2342.94	2585.61	2358.96	1932.18	3776.92	2585.36		41.3349	2.54624	3.21405	2.86619	2.93701	3.28834	3.06485	3.01973	2.79728	2.71977	2.98806		41.3349	2.94415	0.223582	0.0707029
2490.09	9544.68	7042.21	9857.04	8611.89	7701.47	7925.23	7063.14	5407.4	10293.4	7859.28		2490.09	3723.63	2170.67	3457.96	2918.67	2340.54	2611.85	2341.21	1921.49	3834.89	2558.48		41.5016	2.56327	3.24425	2.85053	2.95062	3.29046	3.03433	3.01688	2.81417	2.68414	3.07186		41.5016	2.95205	0.230332	0.0728374
2500.09	9496.44	6973.02	9859.89	8639.31	7728.14	7876.92	7174.31	5390.54	10250.3	7840.39		2500.09	3708.06	2166.84	3456.16	2894.22	2344.14	2597.87	2292.45	1911.58	3793.78	2523.1		41.6682	2.56103	3.21806	2.85285	2.98502	3.29679	3.03206	3.12953	2.81993	2.70186	3.10744		41.6682	2.97046	0.233843	0.0739476
2510.09	9558.72	7043.97	9821.2	8594.2	7675.45	7959.63	7221.8	5415.66	10126.6	7913.99		2510.09	3667.13	2128.84	3430.01	2878.8	2332.65	2551.91	2325.81	1895.4	3737.54	2570.91		41.8349	2.60659	3.30884	2.86331	2.98534	3.29044	3.11909	3.10507	2.85726	2.70943	3.07829		41.8349	2.99237	0.233089	0.0737091
2520.11	9589.24	7017.68	9878.08	8588	7710.6	7927.92	7236.55	5409.33	10175.6	7895.29		2520.11	3677.16	2094.15	3375.71	2868.3	2279.97	2505.95	2315.63	1882.36	3749.97	2490.15		42.0018	2.60778	3.35109	2.92622	2.99411	3.38189	3.16364	3.12509	2.87369	2.71352	3.1706		42.0018	3.03076	0.255714	0.080864
2530.11	9628.24	6975.01	9946.81	8597.49	7633.97	7962.92	7256.88	5411.96	10370.5	7821.97		2530.11	3698.03	2125.11	3445.28	2891	2354.57	2533.01	2314.47	1888.23	3728.25	2525.6		42.1685	2.60361	3.2822	2.88708	2.97388	3.24219	3.14366	3.13544	2.86615	2.78161	3.09708		42.1685	3.00129	0.216756	0.0685443
2540.11	9567.44	6992.09	9920.27	8544.67	7658.83	7819.27	7213.48	5410.45	10236.3	7901.02		2540.11	3640.32	2101.21	3469.13	2861.55	2293.07	2521.95	2277.67	1867.57	3726.47	2516.3		42.3351	2.62818	3.32765	2.85958	2.98603	3.33998	3.10049	3.16704	2.89705	2.74692	3.13993		42.3351	3.01929	0.237957	0.0752486
2550.11	9671.5	6967.67	9930.92	8639.36	7748.29	8071.06	7256.68	5449.62	10326.6	8024.63		2550.11	3637.11	2124.14	3468.49	2859.57	2317.2	2552.87	2307.89	1873.77	3735.77	2490.04		42.5018	2.65912	3.28023	2.86318	3.02121	3.34381	3.16157	3.14429	2.90837	2.76424	3.22269		42.5018	3.03687	0.2307	0.0729539
2560.09	9625.22	6976.65	9943.19	8628.59	7680.08	7968.76	7278.2	5419.81	10338.9	7928.36		2560.09	3671.82	2102.15	3402.73	2823.63	2291.15	2559.37	2309.81	1879.12	3743.06	2500.6		42.6682	2.62138	3.31881	2.92212	3.05585	3.35206	3.11356	3.151	2.88423	2.76216	3.17059		42.6682	3.03518	0.235826	0.0745747
2570.09	9572.05	6931.03	10046.6	8645.2	7686.75	8065.66	7288.71	5425.52	10386.2	8014.96		2570.09	3615.16	2051.38	3461.14	2818.42	2282.61	2480.07	2278.83	1852.02	3719.82	2513.09		42.8349	2.64775	3.37871	2.90269	3.06739	3.36752	3.25219	3.19844	2.92952	2.79212	3.18928		42.8349	3.07256	0.247413	0.0782388
2580.09	9583.09	6912.94	9982.67	8521.25	7714.28	8014.51	7290.23	5423.97	10237.6	7986.21		2580.09	3563.95	2049.87	3366.51	2767.41	2287.36	2490.16	2290.42	1840.13	3640.76	2447.36		43.0016	2.68889	3.37238	2.96529	3.07914	3.37257	3.21847	3.18292	2.9476	2.81195	3.26319		43.0016	3.09024	0.233062	0.0737005
2590.11	9555.01	6880.68	9951.41	8551.8	7690.18	7916.65	7286.87	5400.24	10202.5	7990.28		2590.11	3558.21	2056.06	3376.16	2801.46	2260.08	2441.94	2265.26	1835.64	3586.47	2483.39		43.1685	2.68534	3.34653	2.94755	3.05262	3.40261	3.24196	3.2168	2.94188	2.84472	3.21749		43.1685	3.08975	0.232498	0.0735222
2600.09	9532.36	6985.61	9906.96	8503.47	7653.91	7922.62	7351.3	5404.44	10267.1	8035.31		2600.09	3571.72	2024.55	3378.79	2762.73	2229.22	2412.07	2280.22	1829.44	3701.63	2472.24		43.3349	2.66885	3.45046	2.9321	3.07792	3.43345	3.28458	3.22395	2.95415	2.77366	3.25022		43.3349	3.10493	0.26835	0.0848598
2610.11	9593.13	6875.09	9981.39	8478.71	7696.45	8033.65	7391.31	5447.44	10345.8	8092.43		2610.11	3610.09	2026.09	3380.78	2792.5	2233.54	2483.14	2243.67	1833.41	3631.97	2460.9		43.5018	2.65731	3.39328	2.95239	3.03624	3.44586	3.23528	3.2943	2.97121	2.84855	3.28841		43.5018	3.11228	0.25762	0.0814667
2620.11	9662.16	6901.88	9962.81	8488.6	7667.71	7898.63	7365.95	5437.38	10217.3	8057.94		2620.11	3598.21	2041.01	3380.64	2759.12	2255.75	2395.52	2268.09	1834.69	3601.96	2539.72		43.6685	2.68527	3.38161	2.94701	3.07656	3.39919	3.29726	3.24764	2.96365	2.83661	3.17276		43.6685	3.10076	0.240077	0.0759191
2630.09	9607.41	6907.32	9851.79	8516.43	7703.79	7880.06	7342.28	5424.36	10145.8	8092.81		2630.09	3533.95	1978.96	3345.03	2755.55	2266.31	2444.76	2268.56	1819.04	3495.82	2458.5		43.8349	2.7186	3.49039	2.9452	3.09065	3.39926	3.22325	3.23653	2.98199	2.90226	3.29176		43.8349	3.12799	0.242044	0.076541
2640.09	9484.87	6854.16	9932.53	8425.12	7659.53	7905.21	7416.26	5385.74	10164.9	8095.56		2640.09	3482.7	1961.31	3306.34	2707.9	2217.69	2338.75	2233.18	1800.17	3490.17	2469.58		44.0016	2.72343	3.49469	3.00409	3.11131	3.45383	3.38011	3.32094	2.99179	2.91243	3.27811		44.0016	3.16707	0.256691	0.0811729
2650.09	9562.3	6779.16	9849.44	8473.33	7641.12	7830.53	7329.72	5384.42	10172	8047.24		2650.09	3507.4	1982.2	3348.75	2712.99	2285.81	2332.23	2235.01	1790.51	3583.78	2447.95		44.1682	2.72633	3.42002	2.94123	3.12325	3.34285	3.35752	3.2795	3.0072	2.83835	3.28734		44.1682	3.13236	0.241984	0.0765221
2660.09	9538.03	6849.45	9866.96	8479.99	7695.63	7994.08	7348.89	5394.64	10289.9	8132.28		2660.09	3502.05	1973.93	3296.56	2694.18	2251.24	2383.23	2208.83	1788.94	3511.1	2492.45		44.3349	2.72355	3.46996	2.9931	3.14752	3.41839	3.35431	3.32705	3.01555	2.93069	3.26277		44.3349	3.16429	0.242859	0.0767987
2670.09	9490.5	6828.03	9909.77	8554.34	7630.46	7885.51	7404.53	5393.16	10227.9	8093.37		2670.09	3530.66	2013.64	3372.75	2778.15	2255.54	2391.64	2276.5	1808.87	3560.04	2425.05		44.5016	2.68803	3.39089	2.93819	3.07915	3.38299	3.29711	3.25259	2.9815	2.87297	3.3374		44.5016	3.12208	0.245003	0.0774768
2680.09	9540.14	6828.44	9813.17	8464.53	7651.73	7856.38	7432.74	5391.52	10388.1	8145.41		2680.09	3525.11	2017.25	3267.05	2725.92	2236.94	2409.83	2305.23	1802.6	3523.96	2505.87		44.6682	2.70634	3.38502	3.00368	3.1052	3.42062	3.26014	3.22429	2.99096	2.94786	3.25054		44.6682	3.12946	0.220709	0.0697943
2690.09	9691.13	6914.38	9890.46	8636.31	7739.61	7993.1	7509.19	5461.01	10323	8181.84		2690.09	3564.61	2006.63	3323.63	2759.06	2242.86	2384.62	2315.5	1820.38	3507.01	2532.63		44.8349	2.71871	3.44577	2.9758	3.13017	3.45078	3.35194	3.24301	2.99994	2.94355	3.23057		44.8349	3.14902	0.239387	0.0757007
2700.09	9411.4	6727.3	9754.69	8360.36	7557.06	7860.66	7349	5311.91	9954.03	8021.21		2700.09	3424	1952.48	3249.6	2702.81	2195.62	2277.51	2214.86	1749.78	3450.65	2425.79		45.0016	2.74866	3.44551	3.00181	3.09321	3.44187	3.45143	3.31804	3.03576	2.88468	3.30663		45.0016	3.17276	0.254006	0.0803236
2710.09	9191.33	6622.03	9526.89	8228.7	7419.99	7654.3	7234.52	5217.43	9814.93	7811.6		2710.09	3270.12	1855.18	3085.8	2587.5	2119.79	2230.86	2093.3	1669.38	3330.63	2287.68		45.1682	2.8107	3.56948	3.08733	3.18017	3.50034	3.4311	3.45603	3.12537	2.94687	3.41463		45.1682	3.2522	0.257937	0.0815667
2720.09	9148.09	6641.82	9504.94	8288.13	7357.63	7707.46	7204.19	5201.68	9797.56	7803.72		2720.09	3436.78	1899.69	3233.92	2658.43	2165.55	2332.15	2277.58	1752.7	3402.74	2401.89		45.3349	2.66182	3.49627	2.93914	3.11767	3.39758	3.30487	3.16309	2.96781	2.87932	3.24899		45.3349	3.11766	0.257117	0.0813075
2730.09	9003.91	6485.37	9271.13	8131.93	7231.85	7495.12	7004.95	5096.91	9572.05	7606.16		2730.09	3518.62	1942.94	3203.52	2779.33	2242.81	2326.97	2227.44	1773.39	3398.76	2408.89		45.5016	2.55893	3.33792	2.89404	2.92586	3.22446	3.22097	3.14484	2.87411	2.81634	3.15754		45.5016	3.0155	0.239823	0.0758386
2740.09	9392.86	6711.79	9670.96	8395.77	7538.28	7739.48	7344.41	5296.59	9988.8	7916.52		2740.09	3492.92	1997.23	3273.21	2701.91	2226.58	2357.69	2288.84	1771.8	3375.67	2442.59		45.6682	2.68911	3.36055	2.95458	3.10734	3.38558	3.28266	3.2088	2.98938	2.95906	3.24103		45.6682	3.11781	0.219467	0.0694016
2750.09	9724.2	6980.1	10024.8	8724.38	7885.04	8039.44	7697.81	5498.8	10290.3	8237.43		2750.09	3560.16	2020.22	3357.7	2803.58	2254.87	2406.75	2295.45	1822.64	3454.39	2534.21		45.8349	2.73139	3.45511	2.98563	3.11187	3.49689	3.34037	3.3535	3.01694	2.97891	3.25049		45.8349	3.17211	0.246525	0.0779581
2760.09	9797.39	7036.34	10019.6	8792.45	7888.47	8112.18	7691.86	5528.99	10417.4	8256.53		2760.09	3537.08	2008.26	3418	2801.73	2303.2	2415.23	2319.44	1834.04	3584.53	2535.12		46.0016	2.76991	3.50369	2.93143	3.13823	3.42501	3.35877	3.31625	3.01465	2.90621	3.25686		46.0016	3.1621	0.247665	0.0783185
2770.09	9627.14	6951.9	9934.97	8705.09	7775.96	7993.98	7584.16	5456.92	10352.5	8171.08		2770.09	3618.82	2035.16	3394.95	2844.49	2241.89	2442.42	2299.96	1834.93	3620.85	2489.81		46.1682	2.6603	3.4159	2.92639	3.06033	3.46848	3.27298	3.29751	2.97391	2.85913	3.28181		46.1682	3.12167	0.264959	0.0837874
2780.09	9355.98	6746.54	9607.79	8498.86	7678.72	7919.52	7429.37	5319.18	10001.1	8027.39		2780.09	3826.62	2130.77	3584.29	2939.68	2378.78	2502.48	2428.37	1932.82	3763.88	2659.16		46.3349	2.44498	3.16625	2.68052	2.89108	3.22801	3.16467	3.0594	2.75202	2.65712	3.01877		46.3349	2.90628	0.263278	0.0832558
2790.08	9199.45	6612.18	9403.2	8316.31	7614.03	7793.3	7355.45	5211.63	9724.65	7986.13		2790.08	3994.65	2232.69	3752.71	3045.58	2504.79	2560.76	2537.72	2019.48	3894.57	2699.58		46.5013	2.30295	2.96153	2.50571	2.73062	3.03979	3.04335	2.89845	2.58068	2.49698	2.95829		46.5013	2.75183	0.265156	0.0838496
2800.09	8954.04	6487.25	9100.99	8048.49	7393.11	7695.52	7098.22	5086.74	9497.74	7828.54		2800.09	4078.63	2323.84	3820.6	3206.35	2610.22	2695.99	2620.18	2074.44	4014.18	2803.89		46.6682	2.19535	2.7916	2.38209	2.51017	2.83237	2.85444	2.70906	2.4521	2.36605	2.79202		46.6682	2.58853	0.235419	0.074446
2810.11	8629.25	6296.64	8790.55	7819.8	7307.86	7468.33	7022.07	4943.22	9169.65	7657.66		2810.11	4172.92	2328.55	3936.42	3187.12	2656.44	2734.22	2583.59	2095.59	4066.82	2809.59		46.8351	2.06792	2.7041	2.23313	2.45356	2.751	2.73143	2.71795	2.35887	2.25475	2.72555		46.8351	2.49983	0.257494	0.0814269
2820.09	8472.7	6231.33	8683.59	7692.62	7161.4	7361.54	6941.18	4867.69	9112.69	7607.93		2820.09	4252.36	2414.23	4002.02	3319.27	2698.26	2824.95	2735.44	2155.52	4119.17	2937.1		47.0016	1.99247	2.58108	2.1698	2.31757	2.65408	2.6059	2.5375	2.25825	2.21226	2.59029		47.0016	2.39192	0.229834	0.07268
2830.11	8375.83	6073.71	8550.87	7608.59	7073.66	7275.66	6788.5	4773.7	8799.82	7503.95		2830.11	4304.38	2447.16	4073.21	3331.92	2723.39	2834.11	2741.81	2195.23	4238.07	2998.06		47.1685	1.94589	2.48194	2.0993	2.28355	2.59737	2.56718	2.47592	2.17458	2.07637	2.50293		47.1685	2.3205	0.233936	0.0739771
2840.08	8209.31	5946.36	8439.94	7384.2	6951.41	7119.53	6661.12	4689.69	8771.05	7377.34		2840.08	4383.42	2434.49	4138.76	3401.13	2790.05	2852.11	2780.41	2226.05	4290.9	3009.28		47.3346	1.87281	2.44255	2.03924	2.1711	2.4915	2.49624	2.39574	2.10673	2.04411	2.45153		47.3346	2.25115	0.229421	0.0725492
2850.09	8152.58	5905.1	8204.49	7293.46	6867.96	7129.51	6515.63	4635.03	8631.63	7342.77		2850.09	4477.77	2552.15	4138.44	3482.25	2859.26	2955.91	2859.94	2276.99	4387.19	3102.61		47.5016	1.82068	2.31377	1.98251	2.09447	2.402	2.41195	2.27824	2.03559	1.96746	2.36664		47.5016	2.16733	0.212216	0.0671085
2860.11	8093.6	5856.95	8206.52	7253.24	6803.98	7107.92	6588.95	4622.7	8542	7240.84		2860.11	4503.76	2610.16	4222.21	3457.61	2865.46	2967.34	2881.64	2305.12	4403.51	3159		47.6685	1.79707	2.2439	1.94365	2.09776	2.37448	2.39539	2.28653	2.00541	1.93982	2.29213		47.6685	2.13761	0.208614	0.0659694
2870.11	8049.49	5809.19	8150.22	7242.48	6740.46	6936.55	6437.79	4557.19	8514.24	7188.4		2870.11	4523.31	2627.08	4231.92	3529.9	2933.07	3038.09	2926.86	2311.01	4388.23	3151.29		47.8351	1.77956	2.21127	1.92589	2.05175	2.29809	2.2832	2.19956	1.97195	1.94025	2.2811		47.8351	2.09426	0.18403	0.0581955
2880.11	7882.62	5716.76	8048	7062.49	6614.82	6894.58	6379.51	4490.13	8410.58	7073.53		2880.11	4565.53	2602.17	4247.13	3529.05	2885.11	3035.53	2880.05	2316.6	4449.4	3171.88		48.0018	1.72655	2.19692	1.89493	2.00124	2.29274	2.2713	2.21507	1.93824	1.89027	2.23007		48.0018	2.06573	0.19881	0.0628691
2890.09	7899.2	5665.45	7960.84	7041.61	6557.45	6892.06	6284.56	4459.68	8423.44	7007.16		2890.09	4549.81	2633.9	4261.66	3513.74	2902.23	3060.46	2921.87	2331.58	4467.98	3188.6		48.1682	1.73616	2.15097	1.86801	2.00402	2.25945	2.25197	2.15087	1.91273	1.88529	2.19757		48.1682	2.04171	0.184337	0.0582924
2900.09	7890.76	5593.81	7899.09	6958.48	6519.5	6828.69	6143.76	4448.72	8322.38	7137.83		2900.09	4619.89	2620.46	4262.65	3548.56	2949.95	3105.76	2851.94	2344.93	4529.27	3213.37		48.3349	1.708	2.13467	1.85309	1.96093	2.21003	2.19871	2.15424	1.89717	1.83747	2.22129		48.3349	2.01756	0.187611	0.0593277
2910.11	7761.91	5593.31	7884.81	6939.1	6471.47	6738.6	6088.72	4398.65	8348.4	6913.13		2910.11	4577.57	2646.28	4232.93	3498.56	2937.06	3043.05	2950.02	2343.89	4506.04	3170.4		48.5018	1.69564	2.11365	1.86273	1.98342	2.20338	2.21442	2.06396	1.87665	1.85271	2.18052		48.5018	2.00471	0.178069	0.0563104
2920.11	7665.39	5497.49	7766.54	6698.19	6295.93	6614.99	5974.51	4315.26	8160.08	6845.45		2920.11	4528.48	2584.98	4180.12	3467.67	2871.64	2971.97	2880.89	2316.77	4458.22	3153.76		48.6685	1.69271	2.1267	1.85797	1.93161	2.19245	2.22579	2.07384	1.86262	1.83035	2.17056		48.6685	1.99646	0.184218	0.0582549
2930.09	7703.39	5482.51	7761.79	6825.9	6461.16	6684.68	5985.44	4362.41	8284.14	6894.18		2930.09	4600.1	2663.36	4288.18	3541.68	2905.87	3052.74	2923.55	2351.48	4533.23	3185.95		48.8349	1.67461	2.0585	1.81004	1.92731	2.22349	2.18973	2.04732	1.85517	1.82743	2.16393		48.8349	1.97775	0.18605	0.0588342
2940.09	7806.44	5590.01	7894.59	6927.71	6449.27	6755.05	6063.67	4411.87	8409.33	6948.76		2940.09	4671.36	2701.71	4333.79	3569.25	2926.27	3142.82	2935.69	2398.45	4695.44	3265.26		49.0016	1.67113	2.06906	1.82164	1.94094	2.20392	2.14936	2.0655	1.83946	1.79096	2.12809		49.0016	1.96801	0.180139	0.0569649
2950.09	7780.45	5618.06	7913.07	6926.54	6463.27	6808.65	6136.04	4417.32	8571.76	6908.77		2950.09	4766.44	2732.21	4388.25	3725.26	2980.21	3178.76	3004.3	2429.8	4706.35	3296.46		49.1682	1.63234	2.05623	1.80324	1.85934	2.16873	2.14192	2.04242	1.81798	1.82132	2.09581		49.1682	1.94393	0.179521	0.0567697
2960.09	7780.04	5600.18	7818.13	6789.02	6429.68	6815.31	6002.63	4385.4	8370.53	6866.98		2960.09	4690.82	2731.52	4352.23	3668.95	2936.51	3128.19	2928.97	2402.3	4665.15	3300.62		49.3349	1.65857	2.0502	1.79635	1.8504	2.18957	2.17867	2.0494	1.8255	1.79427	2.08051		49.3349	1.94734	0.184023	0.0581933
2970.09	7680.31	5581.91	7778.63	6804.59	6357.42	6657.69	5996.13	4350.98	8338.28	6821.78		2970.09	4721.16	2798.5	4381.15	3635.08	3024.78	3185.73	2997.73	2430.6	4654.15	3263.25		49.5016	1.62679	1.9946	1.77548	1.87192	2.10178	2.08985	2.00022	1.79008	1.79158	2.09049		49.5016	1.91328	0.165008	0.0521802
2980.09	7787.69	5621.14	7826.7	6924.61	6461.67	6747.51	6048.73	4400.93	8274.13	6870.24		2980.09	4792.18	2793.93	4405.57	3714.14	2963.21	3202.6	2956.24	2447.07	4658.23	3294.51		49.6682	1.62508	2.01191	1.77655	1.86439	2.18063	2.10688	2.04609	1.79845	1.77624	2.08536		49.6682	1.92716	0.18261	0.0577465
2990.09	7594.2	5481.06	7718.25	6660.47	6283.59	6612.01	5857.09	4290.17	8171.18	6678.22		2990.09	4695.1	2752.74	4386.28	3557.17	2954.79	3189.58	2873.53	2388.82	4603.89	3256.27		49.8349	1.61747	1.99113	1.75964	1.87241	2.12658	2.073	2.03829	1.79594	1.77484	2.05088		49.8349	1.91002	0.169061	0.0534618
3000.11	7808.84	5638.89	7799.71	6760.78	6360.28	6708.36	5943.24	4354.06	8279.54	6706		3000.11	4692.48	2778.06	4322.98	3579.5	2927.9	3111.88	2898.51	2383.8	4631.45	3201.04		50.0018	1.66412	2.02979	1.80425	1.88875	2.1723	2.15572	2.05045	1.82652	1.78768	2.09495		50.0018	1.94745	0.175581	0.0555237
3010.09	7636.26	5605.69	7763.72	6730.35	6380.64	6673.57	5933.75	4338.49	8292.63	6736.99		3010.09	4752.07	2784.51	4398.17	3664.12	2960.46	3146.86	2930.84	2420.87	4640.61	3228.78		50.1682	1.60693	2.01317	1.76521	1.83682	2.15529	2.12071	2.02459	1.79212	1.78697	2.08654		50.1682	1.91884	0.184368	0.0583023
3020.09	7669.61	5639.11	7681.21	6806.98	6333.92	6639.47	5967.48	4331.02	8217.89	6766.11		3020.09	4732.22	2783.05	4422.81	3669.37	2997.36	3155.68	2928.02	2430.25	4648.01	3308		50.3349	1.62072	2.02623	1.73673	1.85508	2.11317	2.10397	2.03806	1.78213	1.76804	2.04538		50.3349	1.90895	0.176495	0.0558126
3030.11	7634.07	5601.1	7729.53	6786.93	6220.85	6620.72	5884.37	4314.22	8203.44	6731.06		3030.11	4728.23	2839.35	4351.11	3663.25	2983.26	3188.55	2913.85	2423.76	4604.93	3279.98		50.5018	1.61457	1.97267	1.77645	1.85271	2.08525	2.07641	2.01945	1.77997	1.78145	2.05216		50.5018	1.90111	0.161782	0.05116
3040.09	7700.6	5608.11	7820.97	6768.2	6303.08	6619.93	5924.08	4340.79	8347.42	6749.61		3040.09	4783.48	2799.08	4360.69	3681.14	2965.21	3106.26	2965.27	2427.31	4668.98	3241.84		50.6682	1.60983	2.00355	1.79352	1.83861	2.12567	2.13116	1.99782	1.78831	1.78785	2.08203		50.6682	1.91583	0.17627	0.0557413
3050.09	7681.82	5610.72	7803.1	6770.72	6264.3	6637.44	5863.07	4338.6	8374.03	6688.03		3050.09	4796.19	2828.49	4433.96	3685.76	3006.56	3187.2	2971.89	2450.16	4633.77	3298.22		50.8349	1.60165	1.98364	1.75985	1.83699	2.08355	2.08253	1.97284	1.77074	1.80717	2.02777		50.8349	1.89267	0.160916	0.050886
3060.09	7687.9	5649.02	7798.47	6743.03	6350.67	6671.4	5891.6	4332.98	8231.86	6662.2		3060.09	4766.62	2806.6	4333.68	3692.57	2983.74	3240.74	2974.59	2429.82	4671.84	3250.2		51.0016	1.61286	2.01276	1.7995	1.82611	2.12843	2.05861	1.98064	1.78325	1.76202	2.04978		51.0016	1.9014	0.166549	0.0526673
3070.09	7671.79	5637.52	7791.26	6744.68	6299.94	6622.35	5889.46	4324.25	8245.94	6664.4		3070.09	4801.66	2769.13	4389.62	3696.22	2999.98	3175.56	2934.43	2439.08	4658.57	3237.01		51.1682	1.59774	2.03584	1.77493	1.82475	2.09999	2.08541	2.00702	1.7729	1.77006	2.05881		51.1682	1.90275	0.174844	0.0552906
3080.09	7672.64	5564.6	7749.95	6780.37	6233.72	6555.65	5840.23	4304.31	8066.87	6633.55		3080.09	4794.39	2837.94	4416.73	3673.56	2972.85	3189.35	2903.93	2428.92	4634.02	3256.46		51.3349	1.60034	1.96079	1.75468	1.84572	2.09689	2.05548	2.01115	1.77211	1.74079	2.03704		51.3349	1.8875	0.167256	0.052891
3090.09	7602.05	5522.43	7569.63	6559.64	6216.08	6507.38	5703.35	4255.45	8021.72	6560.04		3090.09	4731.83	2827.73	4354.83	3683.71	2926.05	3144.41	2861.45	2406.13	4562.82	3169.78		51.5016	1.60658	1.95295	1.73821	1.78072	2.12439	2.06951	1.99317	1.76859	1.75806	2.06955		51.5016	1.88617	0.176799	0.0559088
3100.09	7575.47	5532.96	7577.88	6691.45	6165.72	6483.53	5748.72	4258.67	8098.68	6465.98		3100.09	4784.1	2786.48	4403.28	3623.83	2914.2	3212.11	2940.04	2418.35	4638.62	3170.37		51.6682	1.58347	1.98565	1.72096	1.84651	2.11575	2.01847	1.95532	1.76098	1.74593	2.0395		51.6682	1.87725	0.171088	0.0541027
3110.09	6511.55	4746.39	6528.17	5679.55	5354.5	5571.12	4957.88	3627.02	6882.27	5519.65		3110.09	3967.84	2287.4	3655.93	2973.04	2420.96	2586.47	2380.65	1962.4	3809.7	2599.4		51.8349	1.64108	2.07502	1.78564	1.91035	2.21173	2.15395	2.08257	1.84826	1.80651	2.12344		51.8349	1.96385	0.190443	0.0602234
3120.09	6659.06	4816.1	6705.69	5777.62	5437.13	5708.31	5042.67	3709.43	7091.39	5680.88		3120.09	4064	2387.45	3691.15	3039.93	2446.32	2659.92	2402.86	2000.69	3889.37	2630.93		52.0016	1.63855	2.01726	1.8167	1.90058	2.22258	2.14605	2.09861	1.85408	1.82327	2.15926		52.0016	1.96769	0.18929	0.0598587
3130.09	6667.28	4885.09	6724.49	5845.74	5436.58	5799.81	5107.52	3750.21	7173.69	5634.71		3130.09	4082.42	2412.33	3753.22	3107.33	2528.37	2718.62	2484.96	2044.84	3952.1	2735.9		52.1682	1.63317	2.02505	1.79166	1.88127	2.15023	2.13336	2.05537	1.83398	1.81516	2.05955		52.1682	1.93788	0.17088	0.0540372
3140.09	6737.04	4923.27	6781.6	5813.08	5506.16	5759.85	5135.62	3760.69	7056.22	5715.01		3140.09	4102.78	2484.35	3799.75	3139.66	2595.58	2761.98	2521.63	2054.3	3972.22	2739.82		52.3349	1.64207	1.98171	1.78475	1.8515	2.12136	2.08541	2.03663	1.83064	1.77639	2.08591		52.3349	1.91964	0.16387	0.0518203
3150.09	6832.51	5044.69	6800.49	5989.58	5546.95	5912.63	5232.99	3823.85	7286.02	5777.74		3150.09	4148.21	2428.83	3790.65	3207.43	2566.91	2778.03	2533.05	2080.57	3988.6	2780.18		52.5016	1.6471	2.077	1.79402	1.86741	2.16094	2.12835	2.06588	1.83788	1.82671	2.07819		52.5016	1.94835	0.174147	0.05507
3160.09	7013.12	5086.69	6949.58	6060.27	5644.65	5911.84	5283.17	3892.68	7350.28	5860.93		3160.09	4269.05	2518.75	3895.36	3240.71	2609.64	2831.82	2633.89	2130.45	4123.9	2797.24		52.6682	1.64278	2.01953	1.78407	1.87005	2.163	2.08765	2.00584	1.82716	1.78236	2.09525		52.6682	1.92777	0.169943	0.0537407
3170.09	7001.13	5125.28	7005.63	6023.09	5708.66	5912.59	5297.08	3897.01	7430.45	5923.74		3170.09	4321.55	2527.92	3958.48	3247.27	2603.04	2837.31	2661.27	2160.94	4144.51	2879.01		52.8349	1.62005	2.02747	1.76978	1.85482	2.19308	2.08387	1.99043	1.80339	1.79284	2.05756		52.8349	1.91933	0.177453	0.0561156
3180.09	7109.67	5258.73	7159.65	6103.73	5822.38	6145.9	5402.27	3984.8	7681.42	5983.68		3180.09	4416.22	2608.77	3949.56	3321.8	2659.05	2848.21	2704.43	2207.99	4196.97	2906.84		53.0016	1.6099	2.01579	1.81277	1.83748	2.18965	2.15781	1.99757	1.80472	1.83023	2.05848		53.0016	1.93144	0.182009	0.0575562
3190.09	7261.29	5256.26	7159.8	6331.48	5891.94	6252.03	5526.15	4062.25	7618.86	6078.3		3190.09	4514.55	2650.11	4075.1	3370.93	2708.42	2998.5	2781.06	2251.17	4327.4	2967.7		53.1682	1.60842	1.98342	1.75696	1.87826	2.17542	2.08505	1.98707	1.80451	1.76061	2.04816		53.1682	1.90879	0.176484	0.0558091
3200.09	7180.91	5235.38	7144.42	6217.14	5863.34	6132.4	5414.13	4010.87	7629.59	5983.9		3200.09	4428.65	2659.09	4039.98	3330.99	2710.47	2939.61	2740.95	2214.78	4201.08	2916.03		53.3349	1.62147	1.96886	1.76843	1.86645	2.16322	2.08612	1.97528	1.81096	1.8161	2.05207		53.3349	1.9129	0.16559	0.0523643
3210.11	7169.4	5295.24	7134.49	6217.29	5805.17	6183.4	5530.45	4028.56	7693.79	6057.88		3210.11	4466.01	2693.3	4075.77	3413.04	2716.34	3021.2	2747.93	2246.77	4182.8	2950.25		53.5018	1.60533	1.96607	1.75046	1.82163	2.13713	2.04667	2.01259	1.79305	1.83939	2.05334		53.5018	1.90257	0.166227	0.0525656
3220.09	7120.34	5216.24	7159.04	6206.21	5777.06	6151.83	5491.29	3994.51	7594.93	6038.84		3220.09	4426.85	2657.71	4008.55	3362.82	2718.24	2982.64	2781.08	2225.76	4194.17	2938		53.6682	1.60844	1.96268	1.78594	1.84554	2.12529	2.06254	1.97451	1.79467	1.81083	2.05543		53.6682	1.90259	0.16013	0.0506376
3230.09	7171.18	5290.65	7205.46	6233.22	5855.48	6123.3	5430.88	3994.38	7640.9	6029.75		3230.09	4463.2	2656.62	4125.2	3330.8	2721.77	3005.41	2740.2	2236.92	4287	2973.26		53.8349	1.60673	1.99149	1.74669	1.87139	2.15135	2.03742	1.98192	1.78566	1.78234	2.02799		53.8349	1.8983	0.166913	0.0527827
3240.11	7079.21	5231.74	7162.68	6195.82	5831.25	6087.62	5504	3984.26	7525.49	5969.06		3240.11	4419.08	2627.67	4041.86	3366.16	2692.52	2951.38	2748.9	2227.76	4223.62	2919.79		54.0018	1.60196	1.99102	1.77212	1.84062	2.16572	2.06264	2.00225	1.78846	1.78177	2.04435		54.0018	1.90509	0.173686	0.0549242
3250.09	7101.92	5258.21	7091.81	6034.74	5779.24	6108.36	5411.24	3951.67	7600.74	5978.55		3250.09	4422.65	2577.17	4023.99	3302.43	2730.29	2911.35	2713.71	2189.32	4186.55	2857.75		54.1682	1.60581	2.0403	1.76238	1.82736	2.11672	2.09812	1.99404	1.80497	1.81551	2.09205		54.1682	1.91573	0.175146	0.0553862
3260.09	7087.62	5196.95	7159.11	6130.92	5771.82	6065.24	5396.5	3948.95	7556.93	5802.27		3260.09	4426.3	2580.74	3987.55	3266	2631.45	2893.05	2686.28	2186.12	4182.23	2848.23		54.3349	1.60125	2.01374	1.79536	1.87719	2.1934	2.09648	2.00891	1.80637	1.80691	2.03715		54.3349	1.92368	0.176649	0.0558612
3270.09	7211.96	5320.87	7191.79	6226.24	5861.05	6115.45	5504.68	4007.44	7692.19	5994.81		3270.09	4373.21	2605.84	3940.89	3303.61	2664.02	2856.16	2696	2188.44	4167.84	2893.43		54.5016	1.64912	2.0419	1.82491	1.88468	2.20008	2.14115	2.0418	1.83119	1.84561	2.07187		54.5016	1.95323	0.171968	0.054381
3280.11	7270.96	5370.2	7333.98	6266.73	5927.54	6240.84	5597.91	4061.54	7772.4	6122.58		3280.11	4416.79	2545.96	4063.61	3303.62	2697.97	2931.56	2712.99	2207.11	4257.22	2914.69		54.6685	1.64621	2.10931	1.80479	1.89693	2.19703	2.12884	2.06338	1.8402	1.8257	2.10059		54.6685	1.9613	0.181457	0.0573817
3290.09	7353.32	5464.87	7462.22	6440.73	6016.89	6287.51	5668.14	4123.89	7842.13	6147.73		3290.09	4413.78	2592.44	4028.34	3352.42	2727.43	2904.36	2712.59	2214.12	4208.71	2875.09		54.8349	1.66599	2.108	1.85243	1.92122	2.20607	2.16486	2.08957	1.86254	1.86331	2.13828		54.8349	1.98722	0.17762	0.0561685
3300.09	7381.27	5455.8	7434.38	6425.13	5984.45	6232.04	5676.47	4120.97	7883.31	6086.5		3300.09	4392.57	2580.22	3998.63	3289.09	2654.63	2893	2683.87	2192.81	4262.4	2852.14		55.0016	1.6804	2.11447	1.85923	1.95347	2.25434	2.15418	2.11503	1.87931	1.8495	2.13401		55.0016	1.99939	0.180768	0.0571639
3310.09	7479.07	5593.62	7633.05	6563.6	6091.04	6362.38	5765.12	4194.17	8057.57	6285.19		3310.09	4359.51	2571.63	3982.32	3354.87	2661.31	2872.22	2735.81	2192.8	4185.03	2901.21		55.1682	1.71558	2.17513	1.91673	1.95644	2.28874	2.21515	2.10728	1.91271	1.92533	2.1664		55.1682	2.03795	0.178901	0.0565736
3320.09	7195.62	5428.22	7291.55	6341.46	5948.08	6238.21	5611.62	4066.54	7715.29	6040.32		3320.09	4196.16	2484.47	3835.86	3183.03	2567.29	2765.58	2636.6	2109.93	4071.97	2769.48		55.3349	1.71481	2.18486	1.90089	1.99228	2.31687	2.25566	2.12835	1.92734	1.89473	2.18103		55.3349	2.04968	0.192089	0.0607438
3330.11	7272.24	5483.46	7472.33	6366.3	5942.45	6194.89	5636	4086.34	7783.61	6099.14		3330.11	4182.98	2462.95	3831.04	3177.39	2542.7	2825.44	2630.6	2098.14	3984.79	2783.87		55.5018	1.73853	2.22638	1.95047	2.00363	2.33707	2.19254	2.14248	1.9476	1.95333	2.19089		55.5018	2.06829	0.17882	0.0565479
3340.09	7418.42	5593.42	7620.96	6504.53	6039.58	6256.54	5713.45	4147.98	7884.55	6145.65		3340.09	4265.61	2482.62	3840.17	3207.8	2604.35	2861.44	2564.24	2126.46	4011.95	2784.47		55.6682	1.73913	2.25303	1.98454	2.02772	2.31903	2.1865	2.22812	1.95065	1.96527	2.20712		55.6682	2.08611	0.180764	0.0571625
3350.09	7505.28	5711.05	7690.14	6612.73	6143.46	6276.03	5794.84	4213.42	7907.85	6263.59		3350.09	4220.46	2491.54	3883.11	3214.4	2576.67	2819.38	2646.19	2134.68	3975.13	2838.22		55.8349	1.77831	2.29217	1.98041	2.05722	2.38426	2.22603	2.18988	1.97379	1.98933	2.20687		55.8349	2.10783	0.182666	0.057764
3360.08	7612.99	5773.31	7731.15	6667.62	6122.38	6263.72	5795.81	4242.02	8042.66	6310.62		3360.08	4260.42	2480.08	3774.71	3217.87	2578.65	2842.37	2629.86	2130.3	4004.14	2852.58		56.0013	1.78691	2.32788	2.04815	2.07206	2.37426	2.2037	2.20384	1.99128	2.00859	2.21225		56.0013	2.12289	0.175662	0.0555493
3370.09	8622.1	6500.15	8915.07	7640.36	7098.06	7183.8	6575.21	4841.53	9134.91	7141.08		3370.09	4900.49	2852.17	4377.23	3685.88	2940.1	3227.78	3022.33	2477.82	4655.88	3227.03		56.1682	1.75944	2.27902	2.03669	2.07287	2.41422	2.22562	2.17554	1.95395	1.96201	2.2129		56.1682	2.10923	0.190106	0.0601168
3380.09	8450.12	6334.46	8798.92	7519.72	6910.56	7039.89	6464.32	4744.94	8943.88	6956.91		3380.09	4725.87	2754.89	4209.25	3624.01	2894.2	3184.88	2976.71	2403.86	4396.39	3131.04		56.3349	1.78806	2.29935	2.09038	2.07497	2.38773	2.21041	2.17163	1.97388	2.03437	2.22192		56.3349	2.12527	0.172102	0.0544235
3390.09	8344.17	6312.72	8649.9	7395.58	6793.02	6922.25	6456.46	4655.25	8868.54	6737.31		3390.09	4565.48	2619.05	4052.16	3469.59	2775.36	3041.08	2896.43	2311.55	4293.92	3079.2		56.5016	1.82767	2.41031	2.13464	2.13155	2.44762	2.27625	2.22911	2.01391	2.06537	2.18801		56.5016	2.17244	0.18412	0.0582239
3400.09	8363.71	6361.82	8752.22	7340.45	6795.26	6886.72	6348.3	4654.65	8900.13	6772.32		3400.09	4510.35	2581.52	4002.84	3418.91	2711.25	3073.53	2813.58	2275.29	4197.51	3014.07		56.6682	1.85434	2.46437	2.1865	2.14702	2.50632	2.24065	2.2563	2.04574	2.12034	2.2469		56.6682	2.20685	0.189412	0.0598973
3410.08	8269.81	6319.73	8687.07	7424.88	6837.14	6917.86	6307.43	4646.39	8881.7	6774.69		3410.08	4437.59	2515.12	3917.23	3373.13	2682.01	2948.11	2710.93	2226.99	4102.54	2947.83		56.8346	1.86358	2.5127	2.21765	2.20119	2.54926	2.34654	2.32667	2.0864	2.16492	2.2982		56.8346	2.25671	0.200661	0.0634547
3420.09	8365.8	6420.68	8703.28	7465.59	6945.4	6887.25	6372.82	4679.69	8853.38	6762.49		3420.09	4404.94	2481.67	3813.12	3348.51	2596.17	2955.14	2720.83	2209.76	4049.7	2916.35		57.0016	1.89919	2.58724	2.28246	2.22952	2.67525	2.3306	2.34223	2.11774	2.18618	2.31882		57.0016	2.29692	0.220705	0.0697931
3430.09	8402.85	6498.55	8841.8	7547.62	6935.66	6902.86	6448.39	4726.31	8949.81	6852.85		3430.09	4345.66	2419.03	3757.65	3322.1	2630.97	3013.41	2719.89	2201.47	4045.87	2958.9		57.1682	1.93362	2.68643	2.35301	2.27194	2.63616	2.29071	2.37083	2.14688	2.21208	2.31601		57.1682	2.32177	0.219079	0.0692788
3440.09	8381.75	6445.69	8787.71	7565.67	6866.75	6864.36	6396.13	4714.17	8855.54	6890.96		3440.09	4307.15	2394.44	3731.11	3247.93	2586.69	2850.59	2715.41	2160.52	3974.21	2900.27		57.3349	1.94601	2.69194	2.35525	2.32938	2.65465	2.40805	2.35549	2.18196	2.22825	2.37597		57.3349	2.35269	0.216143	0.0683504
3450.09	8481.9	6462.74	8811.57	7629.06	6944.37	6914.78	6440.84	4745.6	8868.16	6894.78		3450.09	4176.13	2363.55	3675.26	3224.11	2522.16	2876.9	2659.69	2128.44	3948.68	2863.13		57.5016	2.03104	2.73434	2.39754	2.36625	2.75334	2.40355	2.42165	2.22962	2.24586	2.40812		57.5016	2.39913	0.217878	0.068899
3460.09	8481.48	6507.18	8843.09	7779.06	6976.93	6905.48	6376.76	4754.56	8928.33	6962.33		3460.09	4083.37	2310.35	3596.16	3172.21	2496.57	2869.21	2585.87	2077.75	3810.95	2844.07		57.6682	2.07708	2.81653	2.45904	2.45225	2.79461	2.40675	2.46601	2.28832	2.34281	2.44801		57.6682	2.45514	0.219027	0.0692626
3470.09	8523.59	6586.5	8882.29	7773.19	7035.12	6982	6542.97	4796.36	8948.46	7006.37		3470.09	4074.83	2329.02	3568.98	3150.26	2451.53	2806.76	2492.87	2053.82	3894.45	2848.37		57.8349	2.09176	2.82801	2.48874	2.46747	2.86968	2.48756	2.62467	2.33534	2.29774	2.45978		57.8349	2.49508	0.23504	0.074326
3480.09	8646.37	6629.72	9060.67	7937.39	7048.54	6983.07	6528.02	4839.81	9062.44	7055.03		3480.09	4048.05	2289.57	3545.66	3115.99	2438.31	2839.45	2550.54	2055.89	3913.98	2799.82		58.0016	2.13594	2.89562	2.55542	2.54731	2.89075	2.4593	2.55947	2.35412	2.31541	2.51982		58.0016	2.52331	0.236305	0.0747261
3490.11	8773.79	6696.15	9050.44	8033.71	7182.33	7205.79	6640.46	4902.58	8973.33	7094.2		3490.11	4013.76	2290.58	3549.01	3147.3	2477.47	2823.68	2511.8	2033.17	3772.19	2765.94		58.1685	2.18593	2.92334	2.55013	2.55257	2.89905	2.55191	2.6437	2.4113	2.37881	2.56484		58.1685	2.56616	0.223287	0.0706095
3500.09	8841.37	6685.97	9176.21	8145.14	7255.21	7201.83	6657.37	4942.37	9001.4	7160.47		3500.09	3964.71	2248.51	3515.49	3040.33	2425.53	2764.55	2492.8	2016.27	3867.09	2767.52		58.3349	2.23002	2.9735	2.61022	2.67903	2.99118	2.60506	2.67064	2.45124	2.32769	2.58733		58.3349	2.61259	0.243957	0.0771461
3510.11	8901.32	6828.54	9253.3	8206.23	7302.9	7221.68	6769.23	4984	9160.92	7258.58		3510.11	3966.24	2267.41	3545.93	3122.25	2401.69	2703.99	2534.35	2003.23	3773.25	2709.8		58.5018	2.24427	3.0116	2.60956	2.62831	3.04074	2.67075	2.67099	2.48798	2.42786	2.67864		58.5018	2.64707	0.242064	0.0765472
3520.11	8908.57	6838.65	9207.2	8140.98	7217.05	7207.25	6833.29	4974.53	9119.13	7239.91		3520.11	3888.98	2253.64	3483.8	3111.68	2359.89	2685.26	2449.03	1970.48	3765.26	2714.01		58.6685	2.29072	3.03449	2.64286	2.61626	3.05822	2.684	2.7902	2.52453	2.42191	2.6676		58.6685	2.67308	0.242281	0.0766161
3530.09	8964.71	6747.18	9181.87	8247.68	7256.52	7294.3	6813.63	4995.98	9166.53	7247.74		3530.09	3835.87	2241.8	3507.26	2987.2	2361.76	2671.31	2424.87	1946.68	3712.55	2655.26		58.8349	2.33707	3.00971	2.61796	2.76101	3.0725	2.73061	2.80989	2.56641	2.46907	2.72957		58.8349	2.71038	0.226282	0.0715567
3540.11	8972.44	6755.93	9188.92	8204.53	7147.02	7153.59	6738.08	4982.24	9012.79	7272.74		3540.11	3803.4	2166.81	3464.45	3008.77	2315.32	2606.66	2423.98	1929.56	3712.42	2612.41		59.0018	2.35906	3.11792	2.65234	2.72687	3.08684	2.74435	2.77976	2.58207	2.42774	2.78392		59.0018	2.72609	0.24498	0.0774694
3550.09	9000.95	6771.66	9232.08	8260.24	7225.24	7334.56	6842.35	5032.23	9184.52	7368.7		3550.09	3766.8	2130.59	3446.55	3007.37	2333.61	2592.5	2347.77	1900.92	3690.46	2643.61		59.1682	2.38954	3.17831	2.67865	2.74667	3.09617	2.82914	2.9144	2.64726	2.48872	2.78737		59.1682	2.77562	0.246139	0.077836
3560.11	9003.82	6725.32	9271.11	8198.7	7219.71	7267.97	6831.56	5002.28	9111.51	7311.77		3560.11	3678.11	2108.42	3356.2	2869.36	2241.62	2563.99	2290.91	1857.07	3673.89	2531.77		59.3351	2.44795	3.18974	2.76239	2.85732	3.22075	2.83463	2.98203	2.69364	2.48007	2.88801		59.3351	2.83565	0.25833	0.081691
3570.09	8889.44	6723.9	9324.2	8120.64	7145.76	7221.71	6730.54	4951.91	9036.26	7186.64		3570.09	3571.1	2074.6	3325.7	2852.19	2245.25	2518.04	2288.14	1825.81	3576.95	2513.96		59.5016	2.48927	3.24105	2.80368	2.84717	3.18262	2.86799	2.94148	2.71218	2.52625	2.85869		59.5016	2.84704	0.242287	0.0766179
3580.09	8939.58	6696.73	9191.55	8186.82	7196.68	7205.69	6831.24	4975.57	9133.68	7283.84		3580.09	3592.06	2068.9	3320.59	2827.6	2215.96	2424.37	2274.93	1814.59	3539.54	2508.38		59.6682	2.4887	3.23685	2.76805	2.89532	3.24765	2.97219	3.00284	2.74197	2.58047	2.90381		59.6682	2.88379	0.249705	0.0789636
3590.09	8963.48	6708.35	9310.83	8144.22	7205.26	7308.29	6892.6	4991.32	9066.64	7423.74		3590.09	3564.04	2065.27	3342.9	2828.09	2246.06	2482.82	2307.34	1810.49	3568.98	2514.38		59.8349	2.51498	3.24818	2.78525	2.87976	3.20796	2.94354	2.98726	2.75689	2.5404	2.95251		59.8349	2.88167	0.244173	0.0772142
3600.09	8502.14	6335.16	8749.99	7714.26	6754.53	6845.27	6457.58	4712.67	8500.86	7003.84		3600.09	3272.51	1867.12	3083.77	2557.37	2020.17	2208.94	2074.15	1629.62	3246.76	2257.72		60.0016	2.59805	3.39302	2.83744	3.01648	3.34354	3.09889	3.11337	2.89188	2.61826	3.10218		60.0016	3.00131	0.268992	0.0850628
3610.09	8374.42	6221.39	8690.12	7692.1	6726.32	6816.93	6405.52	4661.73	8405.67	6892.12		3610.09	3241.6	1819.9	2981.7	2518.21	2019.3	2189.69	2028.11	1603.75	3209.38	2231.02		60.1682	2.58342	3.41853	2.91448	3.05459	3.33102	3.11319	3.15837	2.90676	2.61909	3.08923		60.1682	3.01887	0.271753	0.0859359
3620.09	7998.95	5959.49	8374.75	7388.85	6405.43	6519.96	6100.57	4459.34	8013.99	6669.71		3620.09	3042.06	1708.43	2853.85	2386.21	1867.57	2049.84	1915.97	1489.77	3000.36	2107		60.3349	2.62945	3.48828	2.93455	3.09649	3.42981	3.18072	3.18406	2.9933	2.67101	3.1655		60.3349	3.07732	0.28215	0.0892236
3630.09	7962.19	5854.64	8274.95	7328.39	6398.83	6446.95	6027.19	4414.43	7918.54	6565.71		3630.09	3022.25	1701.11	2787.98	2410.64	1857.78	2015.11	1841.57	1475.19	3073.03	2064.42		60.5016	2.63452	3.44166	2.96808	3.04001	3.44435	3.1993	3.27285	2.99244	2.57678	3.18041		60.5016	3.07504	0.297821	0.0941792
3640.11	7842.02	5752.02	8127.2	7142.77	6220.27	6285.62	5896.39	4341.98	7755.5	6446.23		3640.11	2936.07	1594.92	2729.39	2330.15	1780.03	1918.43	1810.44	1419.66	2882.92	1975.25		60.6685	2.67092	3.60646	2.97766	3.06537	3.49447	3.27643	3.25689	3.05846	2.69015	3.2635		60.6685	3.13603	0.307603	0.0972726
3650.09	7870.69	5827.58	8095.74	7151.06	6167.44	6343.11	5910.55	4363.67	7825.04	6520.03		3650.09	2907.02	1616.79	2744.71	2287.57	1781.07	1930.32	1768.65	1414.73	2906.01	2002.52		60.8349	2.70748	3.60442	2.94957	3.12605	3.46277	3.28605	3.34185	3.08445	2.69271	3.25592		60.8349	3.15113	0.301999	0.0955003
3660.09	7867.21	5753.78	8094.84	7061.23	6229.81	6360.65	5922.31	4343.93	7679.89	6535.85		3660.09	2857.33	1598.36	2711.08	2200.61	1741.68	1946.46	1744.89	1384.19	2801.6	1990.71		61.0016	2.75334	3.5998	2.98584	3.20875	3.5769	3.26781	3.39409	3.13825	2.74125	3.28318		61.0016	3.19492	0.300099	0.0948995
3670.11	7808.85	5697.7	8076.83	7141.95	6219.26	6253.86	5854.99	4335.65	7733.19	6404.72		3670.11	2888.24	1577.52	2683.71	2220.01	1754.48	1988.78	1747.5	1397.15	2869.91	1987.99		61.1685	2.70367	3.61181	3.00957	3.21708	3.54479	3.14458	3.35049	3.10321	2.69457	3.22171		61.1685	3.16015	0.306685	0.0969824
3680.09	7893.45	5776.16	8167.83	7137.65	6199.2	6319.03	5907.14	4353.14	7664.5	6434.74		3680.09	2869.73	1592.32	2708.22	2291.3	1717.36	1967.76	1760.14	1394.76	2834.73	1984.1		61.3349	2.75059	3.62751	3.01594	3.11511	3.60973	3.21129	3.35607	3.12106	2.70379	3.24316		61.3349	3.17542	0.310279	0.0981189
3690.11	7920.17	5754.32	8150.08	7198.36	6197.81	6350.47	5881.9	4372.04	7680.75	6522.46		3690.11	2826.19	1572.42	2678.08	2278.17	1724.14	1937.16	1735.23	1374.79	2822.64	1954.84		61.5018	2.80242	3.65953	3.04326	3.15971	3.59473	3.27824	3.38969	3.18016	2.72112	3.33657		61.5018	3.21654	0.30532	0.0965506
3700.11	7925.19	5788.04	8173.16	7233.94	6196.28	6429.12	5835.66	4374.79	7506.79	6507.54		3700.11	2835.6	1573.45	2676.42	2231.73	1758.31	1891.92	1694.18	1376.86	2776.9	1947.46		61.6685	2.79489	3.67857	3.05376	3.2414	3.52399	3.3982	3.44453	3.17737	2.7033	3.34155		61.6685	3.23576	0.311764	0.0985883
3710.09	7864.53	5717.21	8084.58	7196.77	6144.73	6373.39	5828.23	4345.22	7715.89	6500.01		3710.09	2829.26	1530.11	2632.19	2250.2	1687.61	1877.13	1734.82	1360.96	2756.54	1894.01		61.8349	2.77971	3.73648	3.07143	3.19828	3.64109	3.39528	3.35955	3.19277	2.79912	3.43189		61.8349	3.26056	0.319198	0.100939
3720.09	7862.84	5695.09	8092.31	7192.94	6224.42	6323.13	5882.93	4352.11	7573.9	6556.16		3720.09	2838.75	1530.28	2681.64	2229.68	1711.61	1883.47	1678.72	1354.84	2758.8	1905.25		62.0016	2.76982	3.7216	3.01767	3.226	3.63659	3.35716	3.50441	3.21227	2.74535	3.4411		62.0016	3.2632	0.337321	0.10667
3730.11	7912.39	5759.7	8207.46	7225.95	6323.47	6451.59	6015.95	4398.22	7622.64	6640		3730.11	2830.26	1543.62	2684.18	2228.18	1701.13	1875.61	1728.4	1362.3	2749.04	1939.54		62.1685	2.79564	3.7313	3.05771	3.24298	3.71722	3.43973	3.48064	3.22852	2.77284	3.4235		62.1685	3.28901	0.337578	0.106752
3740.09	8038.93	5795.82	8250.14	7228.76	6254.62	6438.71	5902.55	4407.99	7736.58	6611.77		3740.09	2839.09	1545.19	2661.54	2249.05	1731.33	1890.46	1720.99	1365.44	2708.17	1943.4		62.3349	2.83151	3.75088	3.09976	3.21415	3.61262	3.40589	3.42975	3.22825	2.85676	3.40217		62.3349	3.28317	0.299116	0.0945888
3750.09	7988.6	5749.97	8181.27	7208.36	6246.51	6502.25	5918.04	4406.91	7640.57	6539.84		3750.09	2875.12	1548.32	2650.75	2231.91	1705.35	1880.78	1731.49	1368.77	2741.06	1965.58		62.5016	2.77853	3.7137	3.0864	3.22968	3.6629	3.45721	3.41789	3.21961	2.78745	3.32717		62.5016	3.26805	0.320356	0.101306
3760.09	7953	5731.87	8226.85	7183.08	6225.6	6484.6	6000.74	4405.91	7623.26	6633.36		3760.09	2828.98	1562.45	2618.47	2205.93	1740.02	1827.99	1713.53	1356.45	2700.64	1888.3		62.6682	2.81126	3.66852	3.14185	3.25626	3.5779	3.5474	3.50197	3.24812	2.82276	3.51288		62.6682	3.30889	0.308367	0.0975141
3770.09	7980.28	5749.75	8189.86	7198.32	6243.05	6463.7	6026.22	4404.24	7575.6	6626.57		3770.09	2832.63	1521.38	2691.73	2194.73	1732.35	1808.78	1716.47	1345.47	2705.95	1903.23		62.8349	2.81727	3.7793	3.0426	3.27982	3.60381	3.57351	3.51083	3.27338	2.79961	3.48175		62.8349	3.31619	0.337059	0.106588
3780.09	8021.15	5810.9	8247.54	7244.67	6309.06	6526.56	5972.02	4426.09	7630.83	6613.25		3780.09	2831.79	1512.92	2655.94	2194.38	1703.17	1871.83	1743.08	1360.57	2721.78	1925.31		63.0016	2.83254	3.84086	3.10532	3.30147	3.7043	3.48673	3.42613	3.25313	2.80362	3.43491		63.0016	3.3189	0.337704	0.106791
3790.09	7996.62	5797.53	8247.66	7350.03	6224.54	6520.01	6061.18	4442.14	7520.86	6688.15		3790.09	2816.41	1556.63	2638.8	2237.32	1729.98	1879.7	1723.58	1355.13	2684.46	1943.78		63.1682	2.8393	3.72441	3.12554	3.2852	3.59804	3.46864	3.51662	3.27802	2.80163	3.4408		63.1682	3.30782	0.308273	0.0974845
3800.09	8087.36	5813.71	8311.12	7387.52	6295.54	6624.32	6102.99	4460.92	7641.32	6667.47		3800.09	2860.46	1546.92	2634.47	2211.95	1735.09	1878.31	1708.82	1374.12	2742.7	1921.81		63.3349	2.82729	3.75825	3.15476	3.33982	3.62836	3.52675	3.57146	3.24638	2.78606	3.46937		63.3349	3.33085	0.32918	0.104096
3810.09	8190.32	5797.7	8294.63	7379.24	6318.72	6573.79	6065.38	4488.04	7691.21	6653.52		3810.09	2880.8	1557.07	2658.16	2207.43	1718.81	1892.17	1749.08	1372.62	2708.71	1903.29		63.5016	2.84307	3.72346	3.12044	3.34291	3.67622	3.47422	3.46776	3.26968	2.83944	3.49579		63.5016	3.3253	0.31041	0.0981604
3820.09	7822.35	5550.79	8017.8	7158.13	6042.21	6339.17	5845.2	4313.18	7419.06	6440.09		3820.09	2681.69	1474.02	2493.43	2116.13	1642.14	1793.69	1629.52	1280.29	2611.9	1826.96		63.6682	2.91695	3.76574	3.21558	3.38265	3.67948	3.53415	3.58708	3.36892	2.84049	3.52503		63.6682	3.38161	0.308903	0.0976838
3830.09	7952.35	5673.77	8072.66	7236.7	6155.65	6487.6	5972.49	4379.09	7486.62	6543.21		3830.09	2751.42	1503.78	2611.54	2174.71	1600.1	1803.66	1670.54	1301.02	2596.03	1877.83		63.8349	2.89027	3.77301	3.09115	3.32767	3.84704	3.59691	3.57518	3.36589	2.88387	3.48446		63.8349	3.38355	0.340075	0.107541
3840.09	7922.64	5727.35	8124.99	7242.6	6155.55	6468.62	5942.48	4373.76	7440.96	6521.9		3840.09	2733.92	1461.32	2582.97	2128.69	1627.23	1800.36	1641.84	1301.77	2606.3	1817.75		64.0016	2.8979	3.91929	3.14559	3.40237	3.78285	3.59296	3.6194	3.35985	2.85499	3.58789		64.0016	3.41631	0.357418	0.113025
3850.09	8091.21	5792.23	8171.87	7380.21	6301.91	6547.01	6022.24	4430.81	7660.26	6571.59		3850.09	2786.31	1536.98	2587.65	2189.72	1688.41	1841.65	1719.24	1329.23	2653.99	1883.78		64.1682	2.90392	3.76857	3.15803	3.37039	3.73246	3.55497	3.50284	3.33336	2.88632	3.48851		64.1682	3.36994	0.307967	0.0973876
3860.08	8067.25	5810.81	8227.14	7422	6220.41	6558.71	6053.68	4440.47	7704.58	6716.72		3860.08	2809.39	1514.78	2613.02	2238.49	1683.16	1869.28	1707.74	1337.51	2650.35	1874.43		64.3346	2.87153	3.83608	3.14852	3.31563	3.69568	3.50868	3.54484	3.31994	2.90701	3.58335		64.3346	3.37313	0.322467	0.101973
3870.11	8031.14	5793.88	8301.8	7374.37	6238.23	6557.66	6057.05	4435.08	7712.9	6764.88		3870.11	2760.54	1486.4	2620.79	2210.73	1663.17	1813.76	1702.52	1326.19	2616.84	1885.21		64.5018	2.90927	3.89792	3.16767	3.33572	3.75081	3.6155	3.5577	3.34422	2.94741	3.58839		64.5018	3.41146	0.330547	0.104528
3880.09	8097.99	5794.87	8372.47	7445.09	6317.44	6536.44	6208	4458.89	7738.11	6708.68		3880.09	2820.69	1542.06	2622.06	2201.4	1705.74	1850.77	1701.76	1342.89	2662.1	1936.61		64.6682	2.87092	3.75786	3.19309	3.38198	3.70364	3.53174	3.64799	3.32038	2.90676	3.46414		64.6682	3.37785	0.311092	0.098376
3890.09	8140.48	5826.12	8319.76	7428.32	6275.24	6519.73	6097.1	4447.37	7684.03	6774.58		3890.09	2811.32	1509.02	2669.41	2206.76	1702.47	1873.98	1690.28	1338.31	2582.22	1860.4		64.8349	2.8956	3.86087	3.1167	3.36616	3.68596	3.47908	3.60715	3.32313	2.97574	3.64145		64.8349	3.39518	0.320265	0.101277
3900.08	8102.38	5808.77	8379.2	7441.23	6241.91	6656.85	6173.63	4462.26	7692.05	6747.09		3900.08	2816.9	1533.2	2669.59	2238.78	1724.55	1861.32	1717.11	1349.57	2589.41	1918.5		65.0013	2.87635	3.78865	3.13876	3.32378	3.61945	3.57641	3.59536	3.30642	2.97059	3.51686		65.0013	3.37126	0.300983	0.0951791
3910.09	8052	5738.05	8239.06	7341.38	6263.59	6573.62	6084.34	4399.36	7576.22	6687.72		3910.09	2790.05	1491.96	2611.29	2174.67	1679.94	1876.59	1671.3	1322.6	2545.07	1878.1		65.1682	2.88597	3.84598	3.15516	3.37586	3.72847	3.50296	3.64048	3.3263	2.97682	3.5609		65.1682	3.39989	0.318045	0.100575
3920.09	8096.83	5840.91	8231.54	7415.63	6246.9	6655.94	6059.81	4443.57	7701.38	6763.12		3920.09	2853.84	1534.34	2661.97	2232.7	1691.15	1874.23	1750.89	1344.36	2626.9	1899.22		65.3349	2.83717	3.8068	3.09227	3.32138	3.69388	3.55129	3.46099	3.30535	2.93174	3.56099		65.3349	3.35618	0.32164	0.101712
3930.09	8165.45	5830.98	8293.56	7378.59	6216.45	6683.55	6141.12	4445.61	7672.56	6708.3		3930.09	2828.58	1530.37	2690.25	2250.97	1703.31	1875.68	1733.61	1344.68	2574.23	1927.72		65.5016	2.88676	3.81016	3.08283	3.27795	3.64964	3.56327	3.54239	3.30608	2.98053	3.47991		65.5016	3.35795	0.303658	0.0960251
3940.09	8175.32	5882.43	8277.91	7444.56	6279.26	6686.12	6047.6	4443.62	7656.42	6730.07		3940.09	2859.05	1563.3	2679.07	2270.95	1702.29	1903.59	1734.7	1349.18	2601.44	1937.98		65.6682	2.85945	3.76283	3.08985	3.27816	3.68871	3.51237	3.48625	3.29357	2.94315	3.47272		65.6682	3.33871	0.302958	0.0958036
3950.08	8127.7	5812.05	8385.22	7347.38	6287.81	6640.3	6175.63	4427.1	7573.52	6735.99		3950.08	2822.61	1527.15	2704.93	2207.97	1682.17	1885.91	1763.33	1338.16	2550.87	1876.46		65.8346	2.8795	3.80582	3.09998	3.32767	3.73791	3.521	3.50226	3.30836	2.969	3.58973		65.8346	3.37412	0.315102	0.0996439
3960.09	8101.34	5753.13	8310.42	7371.84	6222.17	6652.12	6212.97	4428.09	7478.83	6680.87		3960.09	2867.6	1531.95	2659.8	2300.36	1711.48	1875.52	1770.04	1358.43	2568.98	1964.36		66.0016	2.82513	3.75542	3.12445	3.20464	3.63554	3.54681	3.51007	3.25971	2.91121	3.40104		66.0016	3.3174	0.307393	0.0972061
3970.09	8072.44	5790.33	8306.48	7441.98	6228.5	6619.64	6180.58	4424.09	7572.59	6779.04		3970.09	2846.19	1568.67	2693.84	2291.2	1721.62	1883.1	1770.03	1353.82	2529.43	1918.6		66.1682	2.83623	3.69124	3.08351	3.24807	3.61782	3.51529	3.49179	3.26786	2.9938	3.53332		66.1682	3.32789	0.287384	0.0908788
3980.09	8129.53	5792.8	8416.45	7462.07	6229.75	6599.13	6202.14	4446.51	7579.09	6756.73		3980.09	2822.18	1536.67	2702	2281.97	1726.56	1898.7	1805.06	1368.62	2530.12	1948.2		66.3349	2.88059	3.76972	3.1149	3.27002	3.6082	3.4756	3.43598	3.2489	2.99555	3.46819		66.3349	3.32676	0.277377	0.0877144
3990.09	8097.06	5795.6	8504.69	7468.6	6306	6693.75	6208.12	4448.81	7635.94	6773.04		3990.09	2869.4	1601.52	2746.88	2255.89	1754.9	1893.98	1757.06	1366.56	2562.42	1979.67		66.5016	2.82186	3.61881	3.09612	3.31071	3.59337	3.53423	3.53325	3.25548	2.97997	3.4213		66.5016	3.31651	0.275613	0.0871565
4000.09	8161.57	5852.93	8444.82	7438.21	6305.56	6716.53	6240.57	4449.77	7665.29	6809.55		4000.09	2825.98	1559.63	2769.44	2257.61	1729.83	1886.64	1806.76	1368.58	2568.98	1946.51		66.6682	2.88805	3.75277	3.04929	3.29472	3.6452	3.56005	3.45401	3.25137	2.98379	3.49833		66.6682	3.33776	0.293545	0.0928272
4010.09	8112.58	5793.8	8450.85	7509.44	6389.24	6747.38	6294.61	4458.59	7527.89	6790.97		4010.09	2873.25	1560.57	2670.43	2267.79	1723.06	1914.28	1808.19	1374.8	2541.97	1998.21		66.8349	2.82349	3.71262	3.16461	3.31134	3.70807	3.52476	3.48116	3.24308	2.96144	3.39853		66.8349	3.33291	0.294839	0.0932363
4020.11	8189.7	5828.66	8557.48	7495.96	6390.9	6686.19	6308.45	4472.02	7553.31	6803.06		4020.11	2879.34	1547.85	2740.12	2311.89	1765.79	1936.33	1823.17	1388.01	2555.98	1974.19		67.0018	2.8443	3.76566	3.12303	3.24236	3.6193	3.45302	3.46015	3.2219	2.95514	3.44599		67.0018	3.31309	0.289594	0.0915775
4030.11	8173.74	5841.78	8525.79	7615.64	6367.72	6781.41	6286.13	4493.99	7649.7	6862.03		4030.11	2920.74	1594.58	2778.05	2319.59	1770.81	1969.88	1794.04	1394.36	2644.27	1999.66		67.1685	2.79852	3.66351	3.06898	3.28318	3.59594	3.44254	3.5039	3.22298	2.89294	3.43161		67.1685	3.29041	0.293406	0.0927832
4040.09	8260.08	5914.13	8592.1	7502.72	6334.45	6832.32	6270.7	4501.12	7678.47	6892.25		4040.09	2908.72	1573.29	2805.77	2275.32	1737.2	1968.3	1792.11	1385.11	2609.26	2019.71		67.3349	2.83976	3.75909	3.0623	3.29744	3.64637	3.47118	3.49906	3.24964	2.94278	3.4125		67.3349	3.31801	0.299545	0.0947244
4050.09	8230.61	5898.65	8556.09	7582.66	6424.67	6823.95	6365.42	4506.7	7653.3	6910.42		4050.09	2921.88	1563.51	2740.89	2322.22	1743.75	1996.21	1823.39	1402.12	2607.33	2039.05		67.5016	2.81689	3.77268	3.12165	3.26526	3.68439	3.41845	3.49097	3.2142	2.9353	3.38904		67.5016	3.31088	0.304632	0.0963332
4060.09	8245.54	5860.91	8604.3	7552	6441.13	6881.86	6336.04	4529.79	7617.62	7010		4060.09	2929.27	1613.09	2823.2	2338.8	1779.11	2003.67	1848.52	1402.96	2512.81	1980.13		67.6682	2.81487	3.63334	3.04772	3.22901	3.62042	3.43463	3.42762	3.22873	3.03151	3.54017		67.6682	3.3008	0.276298	0.0873731
4070.11	8326.75	5902.83	8727.38	7597.39	6425.64	6849.16	6329.23	4549.49	7758.22	6974.34		4070.11	2933.19	1594.91	2819.97	2336.54	1800.76	1959.46	1843.75	1408.99	2648.28	2013.17		67.8351	2.8388	3.70105	3.09485	3.25156	3.5683	3.49543	3.43281	3.2289	2.92953	3.46436		67.8351	3.30056	0.281882	0.0891389
4080.09	8295.89	6005.74	8676.18	7713.9	6480.09	6969.73	6349.16	4563.76	7746.4	6963.26		4080.09	2977.83	1573.12	2906.88	2358.24	1801.39	1993.99	1848.18	1423.3	2682.78	2048.71		68.0016	2.78588	3.81773	2.9847	3.27105	3.59727	3.49536	3.43535	3.20646	2.88745	3.39885		68.0016	3.28801	0.327406	0.103535
4090.09	8268.19	5863.82	8615.19	7629.28	6455.51	6902.83	6402.2	4549.3	7694.79	6938.73		4090.09	2964.71	1610.11	2831.95	2391.78	1835.9	2011.84	1841.16	1423.72	2591.4	2015.38		68.1682	2.78887	3.64187	3.04214	3.18979	3.51627	3.4311	3.47727	3.19535	2.96935	3.44289		68.1682	3.26949	0.275588	0.0871487
4100.11	8241.95	5851.81	8790.49	7654.81	6432.38	6884.61	6324.08	4554.02	7612.44	6909.86		4100.11	2933.19	1591.59	2882.89	2393.79	1851.47	1996.08	1858.44	1425.26	2659.13	2047.91		68.3352	2.8099	3.67671	3.04919	3.19778	3.4742	3.44906	3.4029	3.19522	2.86276	3.3741		68.3352	3.24918	0.278975	0.0882196
4110.08	8320.59	5960.63	8703.51	7597.33	6491.19	6914.47	6426.4	4555.07	7636.75	6990.35		4110.08	2931	1600.38	2842.37	2381.94	1803.43	1992.03	1847.94	1410.44	2564.46	2047.29		68.5013	2.83882	3.72451	3.06206	3.18956	3.59935	3.47106	3.4776	3.22953	2.97791	3.41443		68.5013	3.29848	0.28556	0.090302
4120.09	8356.19	5940.41	8756.06	7691.71	6520.42	6973.31	6477.25	4573.94	7484.26	6976.37		4120.09	2963.61	1615.47	2844.98	2349.4	1835.58	1992.09	1848.72	1431.59	2627.05	2058.36		68.6682	2.8196	3.6772	3.07772	3.27391	3.55225	3.5005	3.50364	3.19501	2.84892	3.38929		68.6682	3.2838	0.295953	0.0935886
4130.09	8297.15	6001.52	8741.64	7608.69	6484.08	6953.52	6376.44	4555.28	7642.45	6951.91		4130.09	2950.54	1628.64	2843.04	2378.54	1815.94	2028.19	1830.91	1419.23	2605.22	2056.84		68.8349	2.81208	3.685	3.07475	3.1989	3.57064	3.42843	3.48267	3.20967	2.93352	3.3799		68.8349	3.27756	0.281695	0.0890799
4140.11	8195.93	5869.29	8767.1	7508.33	6417.98	6917.16	6295.39	4518.61	7609.64	6971.51		4140.11	2945.69	1598.47	2857.74	2332.47	1768.98	1959.38	1807.21	1398.45	2588.52	1985.86		69.0018	2.78235	3.67183	3.06784	3.21904	3.62808	3.53027	3.48348	3.23116	2.93977	3.51058		69.0018	3.30644	0.305402	0.0965765
4150.11	8216.19	5973.66	8717.25	7600.02	6432.38	6868.19	6206.58	4508.7	7667.93	6951.69		4150.11	2924.94	1604.82	2803.88	2352.71	1816.52	1943.69	1771.47	1395.64	2535.66	1989.88		69.1685	2.80901	3.72233	3.10899	3.23033	3.54105	3.53358	3.50364	3.23057	3.02404	3.49353		69.1685	3.31971	0.284692	0.0900275
4160.09	8232.8	5844.88	8623.33	7598.48	6482.8	6893.87	6243.39	4516.65	7581.63	6981.57		4160.09	2930.68	1617.97	2837.95	2374.59	1812.18	2000.94	1860.55	1417.41	2569.84	2026.09		69.3349	2.80918	3.61247	3.03857	3.19991	3.57735	3.44532	3.35567	3.18656	2.95024	3.44584		69.3349	3.26211	0.270834	0.0856452
4170.09	8212.37	5956.2	8728.21	7547.9	6472.88	6928.58	6299.04	4530.11	7593.02	6954		4170.09	2942.73	1635.71	2830.02	2347.7	1799.53	1990.94	1860.07	1420.68	2579.98	2035.07		69.5016	2.79074	3.64134	3.08415	3.21503	3.59698	3.48005	3.38645	3.1887	2.94305	3.41708		69.5016	3.27436	0.279821	0.0884873
4180.09	8256.67	5981.73	8796.12	7700.87	6529.38	7009.64	6216.9	4542.35	7510.29	6964.19		4180.09	2916.05	1618.76	2891.19	2340.31	1822.71	2024.49	1824.66	1413.02	2606.17	2044.62		69.6682	2.83146	3.69527	3.04239	3.29053	3.58224	3.46242	3.40715	3.21464	2.88173	3.40611		69.6682	3.28139	0.288632	0.0912735
4190.09	8228.58	5856.73	8827.68	7696.48	6568.72	6988.15	6241.29	4556.96	7475.7	6970.14		4190.09	2942.33	1624.4	2863.23	2351.68	1810.45	1999.54	1832.56	1418.66	2634.26	2056.92		69.8349	2.79662	3.60548	3.08312	3.27276	3.62822	3.49488	3.40578	3.21215	2.83788	3.38864		69.8349	3.27255	0.293066	0.0926755
4200.09	8361.93	5965.53	8809.83	7674.42	6463.49	7044.55	6271.93	4563.41	7609.71	6954.78		4200.09	2910.92	1567.51	2869.31	2350.45	1824.48	2055.61	1826.44	1411.49	2580.02	2026.89		70.0016	2.8726	3.80573	3.07036	3.26508	3.54265	3.42699	3.43397	3.23303	2.94948	3.43126		70.0016	3.30312	0.284765	0.0900507
4210.09	8189.32	5919.07	8740.19	7596.42	6561.73	7008.09	6273.85	4533.64	7577.54	7000.97		4210.09	2963.01	1606.24	2842.99	2408.57	1829.04	1971.59	1851.11	1414.38	2631.77	2041.71		70.1682	2.76385	3.68504	3.0743	3.15392	3.58753	3.55453	3.38924	3.2054	2.87925	3.42898		70.1682	3.2722	0.308815	0.0976559
4220.09	8334.35	5936.38	8811.04	7708.35	6571.27	6986.44	6335.67	4561.15	7537.39	6974.66		4220.09	2958.85	1654.32	2855.76	2400.43	1846.93	2022.38	1853.57	1426.47	2641.77	2090.64		70.3349	2.81675	3.58842	3.08536	3.21123	3.55794	3.45456	3.4181	3.19752	2.85316	3.33614		70.3349	3.25192	0.271497	0.085855
4230.09	8375.91	5999.93	8885.52	7768.5	6675.73	7036.95	6430.53	4610.84	7586.1	7140.31		4230.09	2973.06	1603.32	2958.4	2458.95	1863.8	2088.35	1866.94	1445.71	2636.03	2096.13		70.5016	2.81727	3.7422	3.00349	3.15928	3.58179	3.36963	3.44443	3.18933	2.87785	3.40642		70.5016	3.25917	0.303042	0.0958303
4240.11	8425.18	5964.05	8945.57	7801.54	6663.45	7124.32	6427.68	4618.3	7580.97	7237.46		4240.11	3003.75	1623.82	2924.6	2438.88	1859.7	2094.26	1891.11	1451.26	2631.06	2105.62		70.6685	2.80488	3.67286	3.05874	3.19883	3.58307	3.40183	3.39889	3.18227	2.88134	3.43722		70.6685	3.26199	0.287983	0.0910681
4250.09	8490.38	6027.08	9016.5	7852.99	6678.72	7148.67	6412.45	4636.27	7658.78	7182.88		4250.09	3006.37	1646.03	2977.32	2453.29	1878.83	2101.52	1894.18	1452.12	2635.25	2084.53		70.8349	2.82413	3.66158	3.02839	3.20101	3.55471	3.40167	3.38534	3.19276	2.90628	3.4458		70.8349	3.26017	0.277923	0.087887
4260.11	8431.42	5923.37	8889.27	7773.06	6586.02	7082.27	6386.04	4615.52	7648.71	7180.29		4260.11	3006.36	1631.54	2925.85	2413.5	1840.9	2076.53	1904.16	1443.6	2676.82	2077.56		71.0018	2.80453	3.63054	3.03818	3.22065	3.57762	3.41063	3.35374	3.19723	2.85738	3.45612		71.0018	3.25466	0.285204	0.0901895
4270.09	8345.36	5969.34	8909.68	7730.73	6620.75	7091.5	6380.51	4594.81	7441.37	7175.09		4270.09	2944.3	1589.95	2886.29	2423.36	1864.66	2078.72	1881.86	1436.02	2633.81	2129.49		71.1682	2.83441	3.75442	3.0869	3.19009	3.55065	3.41148	3.39053	3.19968	2.82532	3.36939		71.1682	3.26128	0.296165	0.0936557
4280.11	8320.42	5920.4	8872.37	7681.23	6622.57	7013.18	6349.68	4572.29	7487.9	7127.45		4280.11	2958.02	1601.13	2888.63	2337.39	1851.83	2018.01	1831.74	1412.93	2579.15	2071.48		71.3352	2.81283	3.69764	3.07148	3.28625	3.57623	3.47529	3.46647	3.23603	2.90325	3.44075		71.3352	3.29662	0.291319	0.0921232
4290.11	8281.33	5990.09	8823.58	7681.85	6632.18	6984.34	6359.54	4562.26	7505.92	7166.11		4290.11	2936.19	1624.93	2848.99	2371.19	1840.96	2043.62	1889.54	1419.8	2581.05	2118.57		71.5018	2.82043	3.68637	3.09709	3.23966	3.60257	3.41763	3.36566	3.21331	2.90808	3.38253		71.5018	3.27333	0.277808	0.0878506
4300.11	8296.02	5922.67	9046.9	7642.46	6535.35	7102.62	6354.04	4568.27	7435.96	7182.27		4300.11	2934.08	1584.4	2844.68	2371.29	1836.72	2064.08	1856.62	1414.66	2596.85	2085.44		71.6685	2.82746	3.73812	3.18029	3.22292	3.55817	3.44105	3.42237	3.22924	2.86345	3.44401		71.6685	3.29271	0.289219	0.091459
4310.09	8234.69	5902.36	8723.35	7624.85	6514.75	7000.44	6345.03	4533.99	7454.09	7115.28		4310.09	2913.73	1598.84	2839.34	2365.44	1830.85	2053.22	1842.68	1407.94	2610.81	2091.6		71.8349	2.82617	3.69165	3.07232	3.22344	3.55832	3.4095	3.44337	3.22031	2.85509	3.40183		71.8349	3.2702	0.286874	0.0907176
4320.09	8206.17	5878.93	8762.16	7579.81	6567.09	7028.72	6319.32	4547.96	7479.92	7040.89		4320.09	2941.63	1597.88	2868.56	2324.26	1826.22	2049.99	1786.62	1415.88	2541.91	2074.82		72.0016	2.78967	3.6792	3.05455	3.26118	3.596	3.42867	3.53703	3.21211	2.94263	3.3935		72.0016	3.28945	0.292386	0.0924606
4330.11	9235.66	6647.71	9929.88	8529.72	7323.12	7916.17	7103.11	5091.29	8392.67	8017.97		4330.11	3322.71	1844.3	3303.61	2682.2	2124.08	2343.13	2120.01	1646.27	2948.09	2410.41		72.1685	2.77955	3.60447	3.00577	3.18013	3.44767	3.37846	3.35052	3.09262	2.84682	3.32638		72.1685	3.20124	0.26803	0.0847585
4340.09	9167.69	6689.98	9893.18	8480.06	7343.28	7916.8	7095.84	5082.28	8417.49	7937.44		4340.09	3323.09	1893.11	3321.91	2709.65	2088.18	2361.06	2135.69	1649.16	2972.34	2384.04		72.3349	2.75878	3.53385	2.97816	3.12958	3.51659	3.35307	3.3225	3.08173	2.83195	3.32941		72.3349	3.18356	0.271307	0.0857947
4350.09	9188.79	6683.29	9835.36	8439.8	7281.12	7934.66	7003.91	5071.59	8171.18	7897.36		4350.09	3329.84	1896.71	3311.62	2720.01	2099.32	2383.76	2145.59	1651.63	2963.47	2377.98		72.5016	2.75953	3.52362	2.96995	3.10285	3.46832	3.32863	3.26433	3.07066	2.7573	3.32103		72.5016	3.15662	0.271279	0.0857861
4360.09	9055.23	6619.23	9702.07	8405.59	7211.63	7716.25	7018.46	5013.95	8267.93	7810.5		4360.09	3280.28	1818.39	3265.13	2610.62	2061.03	2358.44	2102.5	1622.46	2880.93	2341.84		72.6682	2.76051	3.64016	2.97141	3.21976	3.49905	3.27177	3.33815	3.09034	2.86988	3.33519		72.6682	3.19962	0.277385	0.0877167
4370.09	9065.36	6519.68	9684.71	8353.18	7255.62	7890.36	6921.65	5022.82	8230.41	7795.45		4370.09	3285.88	1824.29	3256.35	2606.42	2084.52	2320.18	2081.8	1622.44	2869.9	2364.75		72.8349	2.75888	3.57382	2.9741	3.20484	3.48072	3.40076	3.32484	3.09585	2.86784	3.29652		72.8349	3.19782	0.268851	0.0850182
4380.09	9093.65	6566.02	9659.9	8369.94	7263.65	7943.26	6966.16	5031.02	8119.4	7864.2		4380.09	3251.31	1830.72	3321.67	2640.21	2070.34	2289.59	2096.56	1616.96	2848.72	2357.91		73.0016	2.79692	3.58658	2.90815	3.17018	3.50844	3.46929	3.32266	3.11141	2.85019	3.33524		73.0016	3.20591	0.284575	0.0899905
4390.09	8959.47	6483.08	9576.55	8209.45	7171.27	7846.1	6878.6	4967.7	8024.17	7777.79		4390.09	3222.09	1792.08	3211.14	2593.04	2021.94	2311.94	2025.98	1594.09	2868.49	2330.02		73.1682	2.78064	3.61763	2.98229	3.16595	3.54672	3.39374	3.39519	3.11632	2.79735	3.33807		73.1682	3.21339	0.294596	0.0931595
4400.11	8944.29	6481.19	9688.85	8240.6	7005.14	7710.25	6718.69	4944.68	8039.46	7757.77		4400.11	3229.58	1776.22	3207.08	2574.21	2049.1	2353.26	2079.92	1597.91	2893.77	2349.45		73.3352	2.76949	3.64887	3.02109	3.20121	3.41865	3.27641	3.23026	3.09447	2.77819	3.30195		73.3352	3.17406	0.272055	0.0860312
4410.09	8995.69	6528.24	9686.68	8227.99	7048.95	7704.3	6830.31	4960.76	8072.37	7852.67		4410.09	3226.59	1833.69	3231.6	2601.31	2035.63	2379.83	2070.94	1601.46	2819.25	2357.14		73.5016	2.78799	3.56016	2.99749	3.16302	3.46279	3.23733	3.29817	3.09766	2.8633	3.33143		73.5016	3.17993	0.249226	0.0788122
4420.09	9088.33	6506.65	9868.03	8348.66	7267.83	7864.6	6807.85	5003.14	8143.44	7936.39		4420.09	3243.22	1844.86	3236.5	2575.43	2039.01	2326.51	2056.56	1611.38	2885.12	2386.97		73.6682	2.80225	3.52691	3.04898	3.24166	3.5644	3.38043	3.3103	3.10488	2.82257	3.32488		73.6682	3.21273	0.26512	0.0838383
4430.09	9059.06	6596.88	9740.45	8272.56	7140.45	7804.42	6865.69	5004.04	8117.58	7910.23		4430.09	3299.64	1875.52	3230.23	2670.03	2038.34	2320.36	2050.37	1616.65	2913.41	2387.62		73.8349	2.74547	3.51736	3.0154	3.09831	3.50307	3.36346	3.34851	3.09531	2.78628	3.31303		73.8349	3.17862	0.275415	0.0870938
4440.09	9169.69	6613.15	9846.31	8409.6	7235.71	7832.25	6961.02	5026.33	8052.7	7970.6		4440.09	3335.02	1829.88	3280.7	2654.88	2088.26	2371.97	2079.85	1635.21	2790.85	2371.3		74.0016	2.74952	3.61398	3.00129	3.16761	3.46495	3.302	3.34688	3.07382	2.88539	3.36128		74.0016	3.19667	0.270355	0.0854937
4450.09	9132.3	6581.09	9819.78	8400.8	7200.79	7973.48	6883.2	5033.21	8041.58	8019.7		4450.09	3298.94	1843.85	3311.47	2636.2	2074.17	2359.87	2096.07	1632.35	2874.58	2367.57		74.1682	2.76825	3.56922	2.96538	3.18671	3.47166	3.37879	3.28386	3.08342	2.79748	3.38732		74.1682	3.18921	0.278943	0.0882096
4460.11	9204.97	6654.71	9917.46	8488.19	7206.66	7950.02	6958.46	5051.42	8069.15	7920.34		4460.11	3333.11	1842.3	3293.8	2620.1	2073.65	2402.82	2107.91	1628.35	2835.74	2327.19		74.3352	2.76168	3.61217	3.01094	3.23964	3.47535	3.30861	3.30112	3.10217	2.84551	3.4034		74.3352	3.20606	0.273537	0.0865
4470.09	9155.3	6617	9748.14	8467.33	7176.34	7872.5	6924.92	5016.31	8078.22	7861.48		4470.09	3329.95	1864.65	3317.22	2681.64	2046.34	2397.2	2054.9	1631.75	2917.67	2354.93		74.5016	2.74938	3.54865	2.93865	3.15751	3.50692	3.28404	3.36995	3.07419	2.76872	3.33831		74.5016	3.17363	0.286528	0.090608
4480.11	9095.28	6547.14	9832.83	8438.61	7243.45	7887.47	6945.11	4997.16	8023.43	7888.19		4480.11	3277.93	1849.63	3252.28	2619.77	2057.21	2311.82	2056.52	1607.47	2867.81	2387.45		74.6685	2.7747	3.53971	3.02336	3.22113	3.521	3.4118	3.37711	3.10872	2.79775	3.30403		74.6685	3.20793	0.27639	0.0874022
4490.09	9045.44	6520.21	9694.77	8438.55	7118.17	7907.68	6937.47	4973.97	7959.85	7835.95		4490.09	3277.37	1822.22	3235.98	2660.5	2073.46	2341.51	2075.72	1606.09	2803.9	2402.26		74.8349	2.75997	3.57817	2.99593	3.17179	3.43299	3.37717	3.34221	3.09695	2.83885	3.2619		74.8349	3.18559	0.264108	0.0835184
4500.09	8992.03	6484.95	9595.19	8350.85	7069.06	7864.12	6880.2	4943.61	7902.71	7850.82		4500.09	3248.01	1807.95	3258.01	2625.94	2049.16	2345.41	2053.34	1597.77	2873.63	2359.03		75.0016	2.76847	3.58691	2.94511	3.18014	3.44974	3.35298	3.35074	3.09406	2.75008	3.32798		75.0016	3.18062	0.285978	0.0904341
4510.09	9110.61	6490.86	9725.35	8378.75	7145.55	7853.97	6927.18	4982.57	7884.13	7848.97		4510.09	3263.26	1836.73	3215.05	2633.82	2032.78	2272.92	2049.4	1595.14	2813.79	2321.3		75.1682	2.79187	3.53393	3.02495	3.18121	3.51516	3.45545	3.38011	3.12359	2.80196	3.38128		75.1682	3.21895	0.278815	0.088169
4520.09	9122.76	6565.39	9781.46	8339.04	7066.92	7830.48	6800.04	4980.11	7959.65	7922.44		4520.09	3300.84	1825.67	3275.25	2701.69	2075.21	2356.7	2090.13	1610.79	2805.46	2415.41		75.3349	2.76376	3.59615	2.98648	3.0866	3.4054	3.32265	3.25341	3.09172	2.83719	3.27996		75.3349	3.16233	0.258485	0.0817401
4530.09	9120.43	6617.52	9687.2	8391.46	7195.09	7857.31	6866.77	4986.16	7927.24	7864.22		4530.09	3269.4	1844.63	3258.54	2665.42	2068.92	2354.34	2055.38	1610.5	2825.17	2344.26		75.5016	2.78963	3.58745	2.97287	3.14827	3.47771	3.33737	3.34087	3.09604	2.80594	3.35467		75.5016	3.19108	0.274437	0.0867845
4540.11	9080.75	6503.21	9780.08	8266.4	7047.76	7746.04	6819.26	4952.82	7839.03	7828.26		4540.11	3251.66	1845.3	3266.18	2601.44	2034.18	2332.79	2098.36	1598.54	2789.01	2320.69		75.6685	2.79265	3.52419	2.99435	3.17762	3.46467	3.3205	3.2498	3.09834	2.81068	3.37325		75.6685	3.18061	0.255829	0.0809002
4550.09	9041.58	6527.26	9621.4	8188.58	7032.91	7776.54	6864.1	4931.28	7846.31	7870.09		4550.09	3269.24	1797.1	3248.04	2615.41	2006.19	2323.69	2060.81	1592.82	2879.61	2364.64		75.8349	2.76565	3.63212	2.96222	3.1309	3.50561	3.34663	3.33078	3.09595	2.72479	3.32824		75.8349	3.18229	0.3016	0.0953743
4560.09	8894.49	6390.8	9472.55	8160.74	6944.66	7714.51	6737.14	4882.95	7831.73	7692.14		4560.09	3173.12	1765.16	3182.19	2592.74	1937.66	2299.05	2035.89	1563.89	2731.16	2268.22		76.0016	2.80308	3.62052	2.97674	3.14754	3.58404	3.35551	3.30918	3.12232	2.86755	3.39127		76.0016	3.21777	0.282951	0.089477
4570.09	8770.82	6319.77	9416.96	8006.72	6823.98	7615.51	6580.17	4793.22	7762.66	7638.64		4570.09	3131.76	1778.41	3165.19	2525.42	1957.46	2233	2007.99	1533.75	2716.28	2282.02		76.1682	2.8006	3.55361	2.97517	3.17045	3.48615	3.41044	3.277	3.12517	2.85783	3.34732		76.1682	3.20037	0.260867	0.0824935
4580.09	8823.77	6336.95	9453.37	8170.41	6813.29	7703.05	6705.32	4831.89	7801.16	7811.13		4580.09	3199.92	1771.22	3130.88	2582.94	2017.56	2291.5	2009.59	1557.88	2753.29	2318.25		76.3349	2.7575	3.57774	3.01939	3.16322	3.37699	3.36158	3.33665	3.10159	2.83339	3.36941		76.3349	3.18975	0.262531	0.0830196
4590.09	8859.17	6369.82	9400.43	8104.92	6881.39	7612.87	6580.09	4819.66	7655.65	7645.91		4590.09	3168.71	1753.46	3167.4	2505.44	1961.04	2265.78	1959.65	1540.74	2759.27	2282.8		76.5016	2.79583	3.63271	2.96787	3.23493	3.50906	3.35993	3.35779	3.12814	2.77452	3.34935		76.5016	3.21101	0.290399	0.0918322
4600.09	8685	6229.9	9220.97	7945.74	6769.02	7707.06	6561.06	4754.13	7495.67	7572.47		4600.09	3137.59	1727.67	3081.73	2577.84	1902.93	2239.88	1938.46	1523.26	2654.72	2270.86		76.6682	2.76805	3.60596	2.99214	3.08232	3.55717	3.44084	3.38468	3.12103	2.82352	3.33463		76.6682	3.21103	0.296834	0.0938671
4610.09	8990.48	6493.51	9657.92	8302.15	7037.51	7872.5	6660.55	4947.42	7733.27	7823.5		4610.09	3282	1829.07	3223.49	2594.8	2044.99	2307.42	2024.92	1596.71	2798.99	2334.56		76.8349	2.73933	3.55016	2.99611	3.19953	3.44134	3.41182	3.2893	3.09852	2.76288	3.35116		76.8349	3.18401	0.280705	0.0887667
4620.09	9348.72	6773.17	9973.34	8606.6	7297.76	8233.82	6934.86	5135.75	8086.94	8201.72		4620.09	3526.37	1967.84	3434.45	2806.31	2163.79	2459.38	2152.6	1729.16	3013.5	2544.46		77.0016	2.65109	3.44193	2.90392	3.06687	3.37268	3.34793	3.22163	2.97008	2.68357	3.22337		77.0016	3.0883	0.281413	0.0889906
4630.09	8531	6228.47	9165.85	7860.11	6688.11	7551.96	6399.07	4708.78	7417.8	7504.38		4630.09	3061.8	1723.5	3104.23	2436	1867.22	2213.39	1915.9	1495.52	2639.39	2193.23		77.1682	2.78627	3.61385	2.95269	3.22665	3.58185	3.41194	3.33997	3.14859	2.81043	3.42161		77.1682	3.22938	0.299913	0.0948408
4640.09	8531.03	6222.57	9140.16	7725.64	6602.56	7351.07	6351.08	4668.13	7316.77	7454.18		4640.09	3048.88	1697.83	3027.82	2427.82	1901.57	2141.64	1905.63	1476.59	2586.46	2172.29		77.3349	2.79809	3.66502	3.01873	3.18212	3.47216	3.43246	3.33281	3.16142	2.82887	3.43149		77.3349	3.23232	0.286564	0.0906194
4650.09	8559.42	6201.72	9040.93	7666.72	6707.21	7336.42	6337.48	4671.53	7301.94	7441.29		4650.09	3046.46	1716.79	3060.74	2425.76	1918.45	2183.84	1912.87	1474.51	2667.63	2241.22		77.5016	2.80963	3.61238	2.95384	3.16054	3.49616	3.35942	3.31307	3.1682	2.73724	3.3202		77.5016	3.19307	0.286674	0.0906542
4660.09	9302.25	6753.41	9940.03	8391.64	7282.65	8067.55	6947.56	5110.14	7967.93	8190.66		4660.09	3377.25	1972.82	3435.49	2678.33	2118.67	2451.58	2124.05	1689.31	2882.98	2514.83		77.6682	2.75438	3.42323	2.89333	3.13316	3.43738	3.29076	3.2709	3.02498	2.76379	3.25695		77.6682	3.12489	0.254792	0.0805722
4670.09	9213.51	6719.97	9788.38	8485.67	7204.19	8047.6	6896.44	5078.15	7986.63	8149.5		4670.09	3373.48	1959.12	3398.16	2744.72	2140.91	2487.43	2127.64	1682.39	2904.86	2489.71		77.8349	2.73116	3.43009	2.88049	3.09164	3.36502	3.23531	3.24135	3.01842	2.74941	3.27327		77.8349	3.10161	0.249742	0.0789755
4680.09	8434.14	6057.45	9021.51	7665.64	6592.15	7258.64	6299.07	4630.51	7259.32	7408.92		4680.09	3082.69	1726.49	3096.85	2432.44	1879.2	2200.82	1877.31	1478.56	2584.47	2216.39		78.0016	2.73597	3.50854	2.91312	3.15142	3.50796	3.29815	3.35536	3.13177	2.80882	3.34279		78.0016	3.17539	0.278048	0.0879264
4690.09	9248.93	6706.64	9778.17	8303.52	7227.73	7996.66	6831.08	5061.47	7922.92	8097.92		4690.09	3363.11	1852.9	3339.69	2685.04	2094.13	2416.65	2081.22	1663.08	2854.21	2498.33		78.1682	2.75011	3.61954	2.92787	3.09251	3.45142	3.30898	3.28224	3.04344	2.77587	3.24133		78.1682	3.14933	0.284078	0.0898333
4700.11	9219.99	6653.55	9827.63	8294.62	7208.62	7950.42	6744.72	5043.31	7844.74	8075.38		4700.11	3371.98	1936.67	3322.58	2659.45	2132.39	2423.65	2088.49	1663.91	2854.22	2456.3		78.3352	2.7343	3.43556	2.95783	3.11892	3.38053	3.28035	3.22948	3.031	2.74847	3.28762		78.3352	3.12041	0.248163	0.0784762
4710.11	9064.97	6572.37	9705.75	8193.44	7148.62	7774.67	6746.82	5006.12	7811.66	8004.78		4710.11	3325.59	1890.19	3335.68	2681.9	2111.58	2396.43	2068.37	1638.96	2844.28	2432.23		78.5018	2.72582	3.4771	2.90968	3.05509	3.38544	3.24427	3.26191	3.05444	2.74644	3.29113		78.5018	3.11513	0.2604	0.0823456
4720.11	9246.37	6810.95	9906.73	8466.15	7295.35	8016.5	6780.95	5076.66	7955.14	8113.43		4720.11	3309.39	1896.9	3347.77	2698.03	2077.57	2394.33	2058.56	1647.57	2862.79	2459.33		78.6685	2.79398	3.59057	2.95921	3.1379	3.51147	3.34812	3.29403	3.0813	2.77881	3.29904		78.6685	3.17944	0.279704	0.0884501
4730.09	9239.84	6857.93	9980.4	8446.86	7329.2	8118.49	6853.54	5121.76	8100.53	8208.39		4730.09	3394.61	1894.54	3401.19	2703.63	2114.82	2375.07	2088.17	1667.13	2907.7	2483.95		78.8349	2.72191	3.61985	2.93438	3.12427	3.46564	3.41821	3.28208	3.07221	2.78589	3.30456		78.8349	3.1729	0.297667	0.0941305
4740.09	9480.48	6917.99	10089.3	8659.96	7384.89	8217.55	7015.17	5189.6	8162.23	8290.33		4740.09	3498.22	1967.02	3503.06	2743.15	2106.66	2484.98	2153.88	1716.39	2996.92	2556.78		79.0016	2.71009	3.51699	2.88015	3.15694	3.5055	3.30688	3.25699	3.02355	2.72354	3.24248		79.0016	3.13231	0.29189	0.0923037
4750.11	9373.63	6874.4	9944.49	8469.49	7313.87	8173.15	7012.35	5145.76	7988.9	8239.64		4750.11	3423.76	1946.31	3415.49	2704.24	2130.87	2450.19	2150.52	1691.6	2936.31	2539.42		79.1685	2.73782	3.53202	2.91158	3.13193	3.43234	3.33572	3.26076	3.04194	2.72073	3.24469		79.1685	3.13495	0.27931	0.0883257
4760.09	8213.36	6044.28	8758.21	7464.48	6392.62	7084.06	6091.8	4500.69	7010.76	7237.78		4760.09	2919.89	1673.08	2975.39	2360.13	1803.98	2051.69	1807.89	1420.33	2544.85	2182.08		79.3349	2.8129	3.61266	2.94355	3.16274	3.54363	3.45279	3.36956	3.16877	2.75489	3.31692		79.3349	3.21384	0.299793	0.094803
4770.11	9378.76	6873.36	9962.13	8462.54	7243.72	8057.79	6877.1	5140.12	7995.86	8212.63		4770.11	3384.76	1971.58	3396.93	2784.89	2127.38	2438.84	2111.2	1696.99	2901.13	2544.9		79.5018	2.77088	3.48622	2.93268	3.03873	3.405	3.30394	3.25743	3.02897	2.75612	3.22709		79.5018	3.12071	0.254688	0.0805395
4780.11	9415.64	6858.79	9943.84	8489.56	7349.38	8048.48	6962.28	5145.76	7937.19	8194.91		4780.11	3409.11	2000.97	3438.82	2724.99	2141.88	2430.19	2142.68	1703.04	2913.27	2503.62		79.6685	2.76191	3.42774	2.89165	3.11545	3.43127	3.31188	3.24933	3.02152	2.72449	3.27323		79.6685	3.12085	0.261433	0.0826725
4790.09	9142.71	6626.49	9672.9	8183.57	7120.86	7937.68	6781.82	4998.9	7722.14	7989.1		4790.09	3320.55	1892.32	3284.98	2660.46	2097.5	2373.32	2086.39	1638.37	2780.36	2437.72		79.8349	2.75337	3.50178	2.94458	3.076	3.39492	3.34454	3.2505	3.05114	2.77738	3.27728		79.8349	3.13715	0.258163	0.0816384
4800.09	9023.51	6701.47	9565.65	8187.38	7113.33	7906.37	6614.3	4965.88	7746.21	7929.38		4800.09	3315.28	1953.58	3311.26	2673.39	2104.18	2363.26	2107.24	1635.8	2791.35	2423.08		80.0016	2.72179	3.43035	2.88882	3.06255	3.38057	3.34554	3.13884	3.03576	2.77508	3.27244		80.0016	3.10517	0.253388	0.0801285
