# Supplementary material for: Semisynthetic biosensors for mapping cellular concentrations of nicotinamide adenine dinucleotides
Source: eLife. 2018 May 29;7:e32638. doi: 10.7554/eLife.32638 (PMC5990361; doi:10.7554/eLife.32638)
Supplement: Figure 4—source data 1. [file elife-32638-fig4-data1.xlsx]

## Sheet: Figure 4a
				NAD-Snifit Cytosol		values represent the emission ratio													Treated Data
Control 1	Control 2	Control 3	Rotenone	Rotenone 2	Rotenone 3	NMN 1	NMN 2	NMN 3	NR 1	NR 2	NR 3	FK866 1	FK866 2	FK866 3						Control			Rotenone			NMN			NR			FK-866
1.08081	1.20884	0.75439	0.504734	0.622205	0.542107	0.8956	0.96461	0.81362	0.87732	0.84779	0.60805	1.28358	1.25669	1.54387				min	0.505861	0.468843	0.538656	0.201593	0.214542	0.229027	0.392784	0.382038	0.380001	0.344971	0.38222	0.376113	0.899529	0.939276	0.937115
1.25205	1.12061	0.98227	0.496861	0.791283	0.768616	0.70962	0.84227	0.87521	0.70386	0.64036	0.88489	1.80597	1.65644	1.32864				25th	0.906755	0.8611	0.881132	0.5341	0.567907	0.575047	0.728587	0.720424	0.725503	0.683637	0.715602	0.712951	1.4011	1.43917	1.42945
1.20407	1.6996	1.03711	0.558729	0.58429	0.661205	0.83992	0.84642	0.8953	0.8118	0.81363	0.86259	2.37424	1.51186	1.16465				median	1.03459	0.979776	0.985572	0.64129	0.673422	0.693673	0.835578	0.825158	0.835014	0.783708	0.817519	0.812992	1.58803	1.62162	1.60988
1.24638	0.79753	1.12379	0.801314	0.493967	0.388324	1.0726	1.52282	0.62922	0.65692	2.31256	0.5255	1.63069	1.60073	1.72372				median	1.03458	0.979776	0.985648	0.641334	0.673837	0.693741	0.835497	0.825123	0.835044	0.783698	0.817509	0.813007	1.58805	1.62166	1.61007
1.46513	0.93438	0.74525	0.388464	0.652053	0.339695	1.66661	0.83267	0.62854	0.55398	0.66262	0.92227	1.3351	1.82224	1.90384				median	1.03457	0.979776	0.985497	0.641334	0.673008	0.693615	0.835658	0.825123	0.834968	0.783718	0.817529	0.812977	1.588	1.62151	1.61007
4.8682	0.96407	0.9056	1.00325	0.682298	0.500972	0.44877	0.84254	1.15991	0.87199	0.74445	0.74665	2.02395	1.47773	1.61651				75th	1.17402	1.1226	1.10945	0.75577	0.803484	0.805727	0.952456	0.946015	0.955838	0.909414	0.937857	0.937509	1.73549	1.77243	1.75767
0.66841	2.57897	0.53321	0.784829	0.574013	0.368848	0.98552	1.01218	0.6841	0.54617	0.74579	0.66667	1.4516	1.74074	1.19081				max	1.57491	1.51486	1.45193	1.08828	1.15685	1.15175	1.28826	1.2844	1.30134	1.24808	1.27124	1.27435	2.23707	2.27233	2.25001
1.37196	0.82144	0.75714	0.892432	0.692806	0.604164	1.08067	0.64305	1.0516	2.74326	0.98424	0.82943	1.50815	1.45612	1.38267
0.72713	1.50268	0.93995	0.629774	0.479725	0.815994	0.9362	0.73495	1.10436	0.57332	0.8237	0.72192	1.55345	1.43837	1.00299
2.80261	0.98222	0.83117	0.585054	0.821932	0.688086	0.65487	0.96995	1.72519	0.62312	0.83599	0.68045	2.00086	1.16963	1.43078
1.06986	1.14772	0.909	0.629237	0.685936	0.438049	0.87547	0.93076	0.79391	0.97318	0.70219	0.65459	1.28275	1.59226	1.73072
1.02493	0.89016	0.72067	0.896035	0.613575	0.874391	0.54827	0.71237	0.74043	0.56227	0.44669	0.75057	1.57329	1.25933	1.33058
1.21388	1.15155	0.80862	0.608463	0.842942	1.03277	0.82543	0.89723	0.65354	0.93679	0.70184	0.66383	1.55709	1.69278	1.2782
0.91684	2.54772	0.83034	1.12573	0.663805	0.46684	0.48789	0.61819	0.91071	0.66338	1.03902	0.72376	1.34966	1.70919	1.4704
2.02367	0.90115	0.95862	0.550568	0.566288	0.490266	0.80916	0.72847	0.90945	0.85528	0.75879	0.84449	1.74603	0.95436	1.8154
0.96031	2.25013	0.91409	0.614741	0.751992	0.689521	0.7749	0.63441	0.77015	0.73086	0.8359	1.12486	1.027	1.64431	1.30304
0.71399	1.06924	0.89846	0.546989	0.92251	0.49405	0.73951	0.90919	1.13827	0.70488	0.97265	1.03785	1.92307	1.81406	1.51585
1.23164	0.95935	0.86676	1.25189	0.661146	0.486803	0.86631	1.02781	0.50529	0.90802	2.21527	0.86138	1.63081	1.35118	1.61259
2.06022	0.97445	0.86373	0.573088	0.739859	0.660583	0.69343	0.52359	0.66349	0.62425	0.74394	1.08166	1.24973	1.52549	1.75388
1.08831	1.40088	0.91697	0.638546	0.325611	0.658718	0.69979	0.63057	2.08829	0.61936	0.76571	0.74185	1.91566	1.74208	1.5885
0.74787	0.90881	0.78804	0.499536	0.617178	0.705768	1.08019	0.7277	0.62206	0.60363	2.18174	0.96163	1.44076	1.39763	1.48426
1.09533	1.00736	0.94329	0.57974	1.41699	0.454047	0.5179	0.89095	0.69294	1.01543	0.80834	0.59432	1.22812	1.87374	1.32238
0.79634	1.08908	0.79331	0.681732	1.13752	0.860719	1.81427	0.77122	0.71273	0.74404	0.95533	0.91583	1.36296	1.18393	1.95427
1.26593	1.8541	1.44328	0.419034	0.780906	0.506295	1.00255	0.69006	0.59492	0.83787	1.10107	0.85382	1.77278	1.40898	1.75515
0.84464	1.1766	0.93773	0.570475	0.419003	0.643106	0.73925	0.79265	0.87134	0.775	1.17422	0.87811	1.73601	1.53119	1.8815
0.99103	2.23759	1.15259	0.855574	0.538851	0.87469	0.85908	0.75288	1.12868	0.59384	0.81405	0.89353	1.15539	2.65445	1.73987
1.03839	0.82133	0.69435	0.661856	1.0235	0.581079	1.50386	0.86403	0.8306	1.19952	0.98141	2.43867	1.56182	1.66458	1.90347
1.13286	1.06358	0.92908	0.960287	1.40988	0.840643	0.73912	1.5342	0.69642	1.48046	0.9438	1.90454	1.32219	1.86117	1.34096
1.0022	1.19722	0.88179	0.702748	0.754787	0.73636	0.74783	0.74338	0.80807	0.67465	0.83977	0.69702	1.83201	1.30549	1.81137
1.12418	0.92696	1.06157	0.512248	0.560993	0.613282	0.65116	1.33889	0.95738	0.68393	0.60139	0.90544	1.42857	1.76147	1.53207
1.09292	0.71786	0.74512	0.515148	1.18214	0.773327	0.99859	0.79163	0.63002	0.90199	0.74479	0.74641	0.30885	1.58303	1.68448
0.8301	0.83233	0.98019	0.741991	0.596311	0.711161	0.75586	0.7239	0.61752	0.9738	0.72257	0.71609	1.66839	2.03838	1.43512
3.15565	1.14903	0.98724	0.456284	0.346706	0.454082	0.60692	0.85874	0.70383	0.85449	0.67057	0.93922	1.65987	1.78919	1.68853
1.1811	1.13115	0.92379	0.610681	0.402632	0.590688	1.2819	1.17453	0.89843	0.62664	0.47233	0.67949	1.74261	1.13553	1.47629
0.94103	0.59851	1.13088	0.785673	0.622278	0.664656	0.81403	0.65137	0.94268	0.85846	0.79303	0.89006	1.64546	1.60617	1.82526
0.63898	1.04556	0.9012	0.388269	0.701712	0.599291	1.15839	0.84405	1.23199	0.77997	0.73021	0.93141	1.38258	2.01057	1.7017
2.66884	0.71965	0.97322	0.735754	0.455107	0.545201	0.37022	0.69625	1.33872	0.98123	0.63173	0.71541	1.76678	1.54433	1.58302
0.85075	0.77555	0.39337	0.748717	0.881018	0.45698	0.80519	0.7529	0.57447	1.1115	0.93244	0.60218	1.78074	1.7083	1.55948
1.4125	0.81182	0.92984	0.536721	0.594258	0.689807	0.89066	0.92065	0.68121	0.71576	0.56439	0.93307	1.22122	1.61278	1.5713
1.12115	0.59343	0.84829	0.490007	0.748636	0.684846	1.13826	0.62347	0.90438	0.68075	1.30776	0.69533	1.65999	1.35621	1.69617
0.82125	1.05946	1.09115	0.536682	0.661648	0.868883	0.61482	1.86895	1.10458	0.67737	0.69488	0.68315	1.71931	2.1703	1.60519
1.23224	0.94681	0.81888	0.817696	0.638696	0.683392	0.72772	0.67017	0.83525	0.57699	0.73082	2.06055	1.64583	1.45032	1.65039
1.20855	0.86731	1.25146	0.653012	0.498462	0.697345	0.9355	1.51983	0.55149	0.56916	0.73751	0.662	1.54518	1.8166	1.31174
1.05776	0.74301	0.97155	0.587031	0.63074	0.525189	0.89172	0.61258	0.77146	0.73897	0.84902	0.63342	1.51337	1.88153	1.65836
2.33783	1.03765	0.85714	0.723543	0.548441	0.475856	1.50497	0.89416	2.00678	0.73979	0.74137	0.73704	1.22529	1.01584	1.69152
1.01622	1.47486	1.1029	0.596672	0.416641	0.348848	0.8745	0.81909	0.76404	0.74229	0.92418	0.9457	0.83878	1.27167	1.79846
1.10722	1.26417	1.09487	0.687223	0.479951	0.348359	0.75256	0.84849	0.75223	0.66097	0.88831	0.81204	1.4199	0.91757	1.59888
0.94453	1.01155	0.65044	0.988397	0.692653	0.642435	0.9494	0.8506	0.71844	1.95074	0.88365	0.8893	1.70303	1.53137	1.68229
1.07576	0.98169	0.83581	0.801154	0.67161	0.765351	0.68847	1.05852	0.70751	0.83975	0.78804	1.90473	1.77844	1.77932	1.95204
0.92504	0.99506	0.82037	0.457326	0.383901	0.536736	1.65107	1.04504	0.77744	0.84878	0.73833	0.76424	1.75675	1.31657	1.75776
0.70209	0.93149	0.8812	1.17249	0.509999	0.800087	0.8007	0.64002	0.83773	1.22601	0.88276	0.76557	1.60047	1.53784	1.9247
0.70269	0.88704	1.01099	1.37686	0.636579	0.693884	1.01299	1.06908	0.75664	0.72489	0.70801	0.85186	1.71	1.487	1.80432
1.0056	0.70472	0.76276	0.751347	0.735194	0.867532	0.93029	1.14047	0.65826	0.68761	0.87986	0.87954	1.70569	3.02	1.33538
1.04801	0.92955	0.94628	0.646872	0.632592	0.713231	0.86835	0.54448	0.98346	0.99165	0.79175	0.67167	1.24872	1.65011	1.74984
1.21211	1.14273	0.99649	0.573178	0.675247	1.02765	0.75525	2.15199	0.79721	0.61443	0.71397	0.83448	1.74202	0.93364	1.49112
0.93756	0.93835	1.15256	1.1827	0.576521	0.67188	1.254	0.88999	0.79176	0.55171	0.56082	0.81791	1.68312	1.6146	1.53104
1.083	0.81056	2.30693	0.472294	0.660794	0.939772	0.68474	0.61471	0.66148	0.79275	1.48916	0.81426	1.65082	1.45159	1.77285
1.13411	0.99598	0.4836	0.302054	0.982772	0.858395	0.53179	0.66245	3.33881	0.79551	1.07551	0.97273	2.04591	1.27693	1.54939
1.14119	1.12752	0.99565	0.580296	0.812228	0.780275	1.07532	0.81904	0.78651	0.70988	0.64901	0.853	1.48812	1.60068	1.44091
0.84279	1.01698	0.86313	0.462646	0.573764	0.732111	0.79006	0.77492	0.80903	2.33697	0.71632	0.8772	1.4535	1.33967	1.18117
2.38878	1.12734	1.13377	1.55871	0.759974	0.867962	0.80166	0.82504	0.82752	0.52286	0.67433	0.58594	0.14027	1.67324	1.67472
0.56659	0.93252	0.87519	0.525701	0.77116	0.540785	0.70513	0.92623	0.78397	0.65356	0.65324	0.73958	1.50466	1.41565	1.70727
0.79096	1.03424	1.09779	0.88854	1.77738	0.472538	0.8835	1.02961	0.91023	1.16531	0.90458	0.84534	1.89242	1.50264	1.69803
0.92433	1.10722	1.14366	0.440154	0.498325	0.815726	0.90971	0.70705	0.582	1.05469	0.68407	0.93627	1.24081	1.69174	1.56146
1.04585	0.91984	1.09634	0.716185	0.583084	1.20675	0.79283	0.72777	1.05644	0.81221	0.78715	2.53889	2.41391	1.66825	1.57605
1.24788	0.87122	0.68697	0.654521	0.73082	0.605831	1.89132	1.70658	0.7801	0.84276	0.72602	0.76632	1.57146	1.47433	1.78662
0.96466	1.23235	0.99326	0.862762	0.715767	0.575457	0.97415	0.859	0.75337	2.37625	0.69244	2.78762	1.26461	1.43395	1.83489
1.00285	0.972	0.9404	0.777141	0.583045	0.852174	0.85493	0.66375	0.96466	0.69935	0.8299	0.88754	0.4804	1.04248	1.58027
1.15078	0.82616	1.01766	0.499695	3.79853	0.634468	0.57552	0.71555	0.75416	0.94197	0.63702	0.87634	1.39406	1.66118	0.94352
0.87629	1.03545	1.64376	0.814811	0.655169	0.788689	0.96041	0.48448	0.74125	0.71462	0.53004	0.86186	1.63503	1.75788	1.73836
1.08492	0.99475	0.80571	0.491043	1.0377	0.492251	0.61453	0.73168	0.59802	0.96612	0.86106	0.76627	1.19182	1.7445	1.35789
2.94137	1.79841	0.94705	0.843416	0.512758	0.646076	0.72628	0.76105	0.75569	2.4027	0.97098	0.70563	1.6061	1.38879	2.07298
2.35322	2.5549	0.53955	0.673968	0.682419	0.858234	0.68152	0.7737	0.8032	0.61917	0.76502	0.77636	1.42589	1.75206	1.44972
1.05145	0.76684	1.01686	0.821978	0.476743	0.806945	0.46879	0.68668	0.65864	1.61319	0.86083	0.86796	1.57847	1.67997	1.71783
0.91785	1.01804	1.43656	0.648243	0.735702	0.48112	0.87994	0.85916	0.86827	0.73072	2.61862	0.88361	1.66083	1.71764	1.48265
2.76203	1.03866	0.80573	0.61072	0.846336	0.665474	0.82167	0.64261	1.04632	1.8107	1.00796	0.96552	1.43594	1.70248	1.97159
1.18872	0.73431	1.07953	0.531523	0.697116	0.537206	0.66511	0.91898	0.8512	0.94684	0.94914	0.57544	1.73535	1.65623	1.55314
0.84113	0.95146	0.94725	0.733188	0.480533	0.608556	0.78969	0.84233	0.94034	0.87067	0.78895	0.65081	1.66697	1.37645	1.64208
1.27528	1.29576	0.82692	0.506977	0.543625	0.837154	0.84367	0.72549	0.93703	1.54875	0.55205	1.02055	1.41597	1.54548	1.44079
1.03156	1.09626	1.70292	0.965815	0.647585	0.609844	0.64104	0.83025	0.82545	0.60301	0.73071	0.57	1.34561	1.29271	1.48486
1.08602	1.20329	1.48656	0.602482	0.572909	0.615067	0.83966	2.04211	0.56013	0.76416	0.95561	2.06404	1.57168	1.6228	0.90431
0.86114	1.03759	1.03364	0.492381	0.571513	0.994888	0.66267	0.8038	0.62487	2.32722	0.91478	0.83874	1.87438	1.90491	1.80525
1.05752	1.833	0.81744	0.473174	0.6263	0.690135	0.75939	0.62304	0.93984	1.04858	0.82474	0.66318	1.56893	1.80601	1.44732
0.96679	0.82705	0.95862	0.827448	0.623375	0.879112	0.74065	0.83314	0.91188	0.78824	0.90018	0.40274	1.40973	1.88362	1.11849
0.96338	0.89814	1.02376	0.719504	0.77176	0.455113	0.84236	0.96057	0.85911	0.73165	0.76725	0.93906	1.5073	1.2392	1.82246
1.10088	0.52812	0.9859	0.618621	0.846953	0.648184	1.48198	0.90238	0.62528	1.0545	0.59629	0.77893	1.38038	1.8621	1.24704
1.69017	0.73683	0.80678	0.628548	0.606653	0.523554	1.59205	0.45414	0.93865	0.71432	0.83948	0.69803	1.79568	1.82872	1.86557
0.96905	2.89246	1.28043	0.551242	0.319478	0.440844	0.76749	0.83703	0.63359	0.5704	0.67994	0.95289	1.77086	1.64367	1.82598
2.12258	0.64106	0.93985	0.399957	0.759379	0.534856	0.62941	0.71187	0.68319	0.55872	0.49837	0.67694	1.56037	1.46561	1.17879
1.09384	1.10736	0.86837	0.856558	2.45032	0.650996	0.79912	0.84721	0.92231	0.69564	0.68839	0.78364	1.39336	1.68892	1.43001
1.29295	0.67516	0.8753	0.697345	0.657972	0.694306	0.82206	1.21115	0.91105	1.15688	0.96947	0.74909	0.79442	1.25847	1.17383
0.96986	0.87241	1.21356	0.461737	0.751424	0.546723	1.29086	0.7748	1.46068	0.76386	0.84537	0.61932	1.56456	1.88034	1.56199
1.64639	1.32047	0.78553	1.21815	0.408013	0.668894	0.75389	0.96224	0.70118	0.67645	0.81115	1.16749	1.35154	1.14821	1.9432
0.92642	1.00777	0.74555	0.729162	0.352552	0.899269	1.129	0.77937	0.94614	0.90766	0.79924	0.57176	2.07392	1.70992	1.80002
2.2178	1.13908	1.95764	0.645062	0.707935	0.70314	0.87981	0.7226	0.7889	0.67538	2.34338	0.66619	1.69889	1.4464	1.84359
1.6529	0.95427	1.0971	0.797613	0.757308	0.637586	0.90315	0.89417	2.00795	0.58158	1.38158	0.85889	1.15505	1.09299	1.56129
0.94285	0.71391	0.96354	0.724032	0.606787	0.525396	0.89646	0.68495	0.71772	0.89766	1.06436	0.82498	1.34177	1.38936	1.85798
0.9059	1.06665	1.75561	0.531418	0.650033	0.622218	0.58213	0.64728	0.67291	0.83794	0.81545	0.95554	1.07258	1.6166	1.2916
1.19727	0.82745	0.78032	0.531712	0.389488	0.869916	0.88604	0.7397	0.65964	0.87756	0.95006	0.69897	1.38381	1.91162	1.63685
0.98305	0.90251	1.20934	0.544322	0.564859	0.445431	0.62522	0.76447	2.55753	0.78994	1.09779	0.64285	2.62923	1.46175	1.6586
1.04171	1.59034	1.10256	0.261963	0.823485	0.737685	0.85775	0.80181	0.85714	0.59071	0.70311	1.15593	1.55441	1.66392	1.70838
0.89071	0.79675	0.78027	0.594133	0.909286	0.574213	1.0408	1.00328	0.77104	0.61772	0.5072	0.84703	1.75627	1.92003	1.71356
0.99199	0.92005	0.97823	0.947328	0.703475	0.505361	0.94242	0.87167	0.96539	0.63233	0.88266	0.89607	1.72691	1.26207	1.49957
0.94055	0.71772	1.18791	0.70926	0.930942	0.435412	0.5981	0.80864	1.03529	0.75179	0.73473	0.7023	1.56795	1.68211	1.86389
1.14255	0.7548	1.04631	0.572592	0.561156	0.736309	0.64857	0.96998	1.05932	0.61407	0.95263	0.86571	1.09609	1.90132	1.55437
0.92379	0.92702	0.91655	0.76577	0.626196	0.609851	0.63648	0.75713	1.07656	0.73524	0.72126	0.623	1.6468	1.89502	1.14383
0.78722	1.27196	0.80944	0.712658	0.662963	0.873017	0.59871	0.80905	0.84924	1.0165	0.88609	0.69203	1.5564	1.84257	1.8249
0.94417	0.79492	0.45035	0.761645	0.398031	1.00978	0.96062	0.72034	0.8243	0.62673	0.84032	1.07599	1.79979	1.8838	1.69875
1.0641	1.91259	1.03928	0.596768	0.636236	0.383729	1.20235	0.90458	0.65384	0.56998	0.23383	0.71076	2.13324	1.91656	1.7328
1.04782	1.10603	0.62823	0.676478	0.607047	0.784244	0.90323	0.51084	0.9079	0.85527	0.9619	0.58421	1.54957	1.44658	0.90082
1.06597	2.14019	1.13451	0.553081	0.787853	0.688348	2.67025	0.80616	0.70707	0.85551	2.84948	0.77766	1.15467	1.6853	1.42358
1.3395	0.81899	1.34771	0.654617	0.535595	0.503866	0.78898	0.717	0.82683	0.97574	0.81172	0.80001	1.08103	2.11592	1.89177
1.00498	0.7173	0.74237	0.384261	0.75096	0.69654	1.10564	0.57504	0.32334	0.8595	0.98305	0.79699	1.52209	1.86403	1.01447
0.82905	0.91299	1.18843	0.631069	0.651497	0.776647	0.81719	0.82381	0.97222	0.86334	0.82192	0.91268	1.53507	1.43561	1.00487
0.90205	1.03265	0.79504	0.697081	0.585631	0.809289	0.79159	0.55557	0.21457	1.42995	1.16321	0.88264	1.60054	1.72967	1.74439
1.34191	0.93484	0.96309	0.386852	0.809522	0.524012	0.70004	0.66389	0.70317	0.6961	0.70362	0.65945	1.78558	1.57589	1.48256
0.96797	1.437	0.47818	0.565243	0.648161	0.669444	0.87819	0.70509	0.85549	0.61848	1.01001	4.2059	1.75486	1.35758	1.46937
1.0509	1.04908	1.29331	0.677085	0.743899	0.581675	0.95306	1.01881	0.69273	0.63138	1.23495	0.87321	1.39534	2.03418	2.07747
1.11759	1.24325	1.03436	1.06003	0.683201	0.479394	1.29587	0.76427	0.82091	0.57721	1.47087	0.87454	1.29509	1.69493	1.71728
0.84776	0.86602	0.94501	0.646156	1.10618	0.587788	0.83935	0.53853	0.88815	0.79669	0.98879	0.9515	1.59829	1.7679	1.67033
1.10514	0.86961	0.97014	0.545271	4.30392	0.868808	2.04264	0.69022	1.14272	0.84492	0.81351	0.85855	1.13431	1.88973	1.5355
1.15177	1.08206	0.94902	0.61159	0.56778	0.433385	1.08307	1.03687	0.60229	0.90959	0.59519	1.88162	1.61041	1.52627	1.74272
0.93427	0.92371	0.94217	0.457334	0.815189	0.742209	0.63596	1.47819	0.95975	1.68438	0.8439	0.65178	1.67337	1.69744	1.77303
0.78825	1.02392	0.93289	0.603978	0.539445	0.358697	0.58283	0.75164	1.23197	0.88047	0.76728	0.8292	1.62637	1.82271	1.78962
1.19394	0.83999	0.91408	0.545414	0.691375	0.74813	0.89916	0.87011	0.56565	0.72302	0.70855	0.71771	1.78286	1.60634	1.71402
0.98143	1.07315	0.89006	0.844454	0.666074	0.743234	0.8961	0.81329	0.72207	0.71546	0.80263	0.85267	1.50728	1.96485	1.17852
2.56987	1.48753	1.04021	0.646916	0.731306	0.808172	0.84675	1.41771	0.97708	0.97201	0.84381	0.81611	1.57522	1.75083	1.55568
0.944	0.8926	1.02501	0.590722	0.728359	0.668462	1.02426	0.83794	0.94931	0.85988	0.89579	0.79555	1.80684	1.57459	1.64904
0.94435	1.08337	0.96841	0.463885	0.765741	0.548655	0.86591	0.95153	0.57645	0.58201	2.54067	2.3655	1.71506	1.68298	1.35412
0.97281	1.19978	1.34445	0.699207	0.764252	0.727054	0.79917	0.87251	1.65198	0.6609	0.68398	0.86009	1.52954	1.59785	2.01645
0.94325	1.3108	1.13107	0.529622	0.814867	0.569512	0.83653	0.82215	0.87219	2.00386	1.03847	0.72117	0.91012	3.54877	1.65972
1.09943	1.66638	1.01059	0.539045	0.528298	0.586143	1.05407	0.71527	0.58316	1.91037	0.673	0.78285	1.76672	1.71552	1.6212
0.7983	0.95933	0.49889	0.698475	0.539257	0.748561	1.09923	0.83437	0.52987	0.8024	0.85457	2.13077	1.2708	1.57568	1.46909
2.40945	0.89468	0.67802	0.453997	1.0745	0.544314	1.0634	0.90625	2.01265	0.63453	0.88358	0.91593	1.08392	1.51464	0.25684
1.181	0.38724	0.72527	0.604179	1.01372	1.01433	0.82627	0.86248	0.63113	0.98111	0.79042	0.58062	1.60945	1.42615	1.72572
1.08961	2.4397	0.99339	0.43154	0.766318	0.666034	1.29976	0.67439	1.46493	0.39041	0.88546	0.87279	1.78385	1.61693	1.62491
1.06243	0.6202	1.63201	0.404809	0.373236	0.550623	1.08932	0.58381	0.8782	0.57242	0.78792	0.87504	1.55169	1.09489	1.89052
0.91523	0.92701	1.00686	0.700049	0.573801	0.907197	0.72139	0.75629	0.72878	1.84158	1.21855	1.01256	1.47139	1.96579	1.6223
2.61506	0.91887	0.93057	0.358254	0.665337	0.570336	1.03865	2.15358	0.62073	0.84134	1.26746	0.96058	1.7436	1.76436	1.28669
1.89468	0.92409	1.1303	0.554399	0.564139	0.833907	1.32731	0.99782	0.55066	0.79757	0.62109	0.93372	1.595	1.21949	1.27803
0.70397	1.03386	0.87522	0.592253	0.622044	0.669403	0.8248	0.71343	0.77066	0.45624	0.79339	0.86032	1.79696	1.28802	1.45314
0.87232	1.10555	2.12441	0.797773	0.478699	0.502083	0.7542	0.86437	0.69453	0.62157	0.8528	2.23041	1.91603	1.67391	1.68476
1.06273	0.78758	1.02035	0.548495	0.58041	0.830986	0.85911	0.71459	0.76343	0.86637	0.65982	0.53726	1.24562	1.56354	1.64942
0.67464	1.23981	0.99169	0.570431	0.725068	0.357077	0.83231	0.85971	0.46408	0.60694	0.80843	0.79983	1.48878	1.33124	1.58323
2.30547	0.99572	1.32343	0.88679	0.870234	0.750007	0.76312	0.8032	0.84174	2.52558	0.87746	0.8002	1.63656	4.56277	1.76728
0.92299	0.70627	0.8373	0.361053	1.03752	0.580175	0.86471	0.86382	0.82895	0.85772	1.13643	0.66607	1.41668	2.37985	1.70559
0.77468	0.92548	1.0193	0.737137	0.565845	0.758384	0.77035	0.62266	1.0414	0.51728	0.79705	0.56464	1.87144	3.36649	1.41439
0.8562	0.85025	0.89265	1.48239	0.46898	0.555154	0.54814	1.47156	0.73751	0.71753	0.93214	0.58316	1.64602	1.32224	1.67991
0.89263	0.76957	0.96961	0.779477	0.514193	0.69964	0.77584	0.91844	1.0559	1.09723	0.81953	0.5915	0.95494	1.85989	1.65593
1.18071	1.01829	0.87362	0.460512	0.380647	0.762451	0.95638	0.76002	1.22843	0.91588	0.72413	1.6104	1.76834	1.59332	1.55916
1.11685	1.10005	1.02411	0.735898	0.84026	0.643454	0.61665	0.82245	0.91896	0.69699	0.47047	0.6208	1.52645	1.79115	1.29959
1.33072	1.00191	0.99558	0.409758	0.750111	0.979507	0.79619	0.56828	0.98622	0.62055	0.86958	0.89202	1.68847	1.43824	1.65551
2.14794	0.87038	1.09146	0.779872	0.86203	0.502959	0.74599	0.76278	0.6664	0.61123	0.8707	1.2876	1.74711	1.85508	1.45357
0.91436	1.13789	0.99637	0.71837	0.758407	0.481743	0.8244	0.88202	0.81012	1.02288	0.82736	0.72931	1.3012	1.43629	1.54444
0.75198	0.95006	1.42728	0.69086	0.580434	0.848086	0.74154	2.63465	0.71637	1.06751	0.56002	0.73099	1.39902	1.67269	1.70425
0.95756	1.06422	0.6987	0.380627	0.449345	0.618424	0.77669	0.68703	0.89057	0.68809	0.78685	0.80592	1.68348	1.75366	1.58036
0.97782	1.94556	0.92751	0.607429	0.438747	0.945008	0.80904	0.77995	0.95608	0.77925	0.67047	0.79535	0.93638	1.6372	1.63581
1.12188	0.79431	0.96581	1.59405	0.646893	0.727727	0.74355	0.78408	0.7746	0.69347	0.66396	0.73735	1.48906	1.60476	1.62628
1.19923	2.83715	0.72768	0.695093	1.97433	0.85454	0.88997	0.81606	0.9011	0.7284	3.7994	0.40784	1.87099	1.58172	1.8411
1.09225	1.18814	3.22923	0.445339	0.650125	0.546067	0.89952	0.85795	0.79194	0.91825	0.72255	1.03831	1.88869	1.54248	1.28715
2.09291	2.613	1.15112	0.728597	0.618197	0.693404	0.96989	0.62627	0.67017	1.75498	0.81284	0.65289	1.60613	1.77336	1.32806
1.18128	0.97868	0.89421	0.569061	0.8086	0.617186	0.49093	0.86763	0.88024	0.73579	2.4944	1.30497	1.59475	1.62633	0.81582
0.84242	0.96637	0.91697	0.742024	0.880209	0.647048	1.07192	0.7493	1.14679	0.40655	2.13026	0.81921	1.35055	1.67917	1.537
1.09082	1.04874	0.75787	1.74232	0.776909	0.935648	0.63852	0.77885	0.80268	0.87157	0.98609	0.84655	1.45328	1.66923	1.89417
0.94879	0.78661	0.88317	0.674664	0.580661	0.526562	0.71147	0.85378	1.18694	0.97645	1.13318	0.88152	4.08263	1.60419	1.4628
0.98261	0.92934	0.88841	0.548789	0.864365	0.796242	0.83194	0.66919	0.76394	0.74192	0.85162	0.65712	1.61088	1.52737	1.70972
0.98141	1.01128	0.60076	0.658762	0.681335	0.62073	0.77536	0.86522	0.71997	0.6926	0.85226	0.76577	1.29058	1.46931	1.18667
1.01362	0.97332	0.63199	0.83515	0.796006	0.661293	1.15178	0.80689	1.53291	1.50185	0.85027	1.03727	1.5797	0.90924	1.62676
0.93102	1.20948	1.12928	0.662103	0.578799	0.805537	0.97149	0.78551	0.79926	1.0501	0.9415	0.6179	1.35472	1.44876	1.05584
1.02382	0.68075	0.74909	0.514857	1.15318	0.396043	0.80326	0.98523	1.11984	0.6725	0.80491	1.89526	1.4557	1.32568	1.44328
1.16274	0.82502	1.06449	0.686381	0.405155	0.947751	0.92898	0.93973	0.97935	0.91251	1.22952	0.73417	1.21496	1.92477	2.00797
0.9378	1.43696	0.70681	1.8974	0.477366	0.723478	0.85894	0.97462	0.61018	1.05673	0.69492	0.78551	1.58939	1.57664	1.48137
0.75763	0.90756	1.61162	0.46881	0.803894	1.13071	1.1133	0.7006	0.99597	0.93231	0.52937	0.7654	1.8381	1.72555	1.54436
1.00171	0.90791	1.01153	0.559877	1.4606	0.74447	0.87055	0.89174	0.82348	0.86902	0.58616	0.90898	1.68606	2.13975	1.41136
1.68807	0.83144	1.08726	0.446418	0.59803	0.720828	0.90539	1.04142	0.63021	0.93655	2.5963	0.75324	1.71923	1.50461	1.47546
1.08199	0.97652	0.65253	0.752099	0.552362	0.677822	0.84161	0.89189	0.73219	1.04735	0.95743	1.13617	1.88437	1.32962	1.63134
0.89648	1.55516	0.94816	0.454653	0.810963	0.416723	0.68778	0.96835	1.02626	0.65016	0.96185	0.78546	1.68743	1.85706	1.64205
2.12486	0.45904	1.5057	0.622926	0.385529	0.53446	0.79186	0.77313	1.09864	0.63707	0.75203	0.96973	1.81468	1.58724	1.54219
1.03776	1.04829	1.05644	0.540756	0.628095	0.830965	0.83987	0.79082	0.65599	0.8555	0.7042	0.90594	1.58061	1.14115	1.34434
2.01291	1.11353	1.28984	0.532228	0.90393	0.689	0.68515	0.71529	0.62412	0.75939	0.87335	0.7858	1.6535	1.44844	1.92846
1.07328	1.17108	1.13824	0.490338	0.680644	0.679298	0.79755	0.95215	0.90475	0.84016	0.66819	0.6747	1.68306	1.96799	1.24238
1.03966	0.95396	1.06903	0.624761	0.933644	0.741839	0.84094	1.02331	1.17739	1.25684	0.85245	0.71968	1.40354	2.11538	1.81282
0.82898	1.02253	1.00526	0.591321	0.357825	0.506617	1.54294	0.63465	0.59537	0.92972	0.55013	0.37167	1.39047	1.78186	1.68505
1.05259	0.9203	0.96293	1.19331	0.860735	0.655257	0.82913	0.83299	0.70284	0.44769	2.24122	1.50257	1.37176	1.93568	1.53025
2.44573	0.85885	0.94602	0.613134	0.718055	0.643285	0.84538	5.67944	0.90484	0.83481	0.74997	0.96483	1.71873	1.39934	1.71369
1.01532	1.18023	0.92224	0.505903	0.866905	0.530685	0.89438	0.95324	0.87287	0.61842	0.76775	0.86987	1.51777	1.40024	1.64082
1.12009	0.93083	0.9447	0.615397	1.02585	0.532776	0.74846	0.70817	0.91104	0.75678	0.78534	0.44442	1.65195	1.60463	1.75946
0.72462	0.74892	1.05032	0.567056	0.781423	0.611559	0.63619	1.01328	0.84047	0.7744	0.72496	0.67036	0.88249	1.4919	1.3042
1.06582	0.92641	0.92965	0.737985	0.560349	1.02999	0.87261	0.82317	0.80098	0.89013	0.76333	0.68506	1.27014	1.54974	1.79271
1.12294	0.86113	0.86162	0.517032	0.73105	0.786787	0.88705	0.88434	1.18879	0.81169	0.71605	0.85314	1.67413	1.25076	1.38629
1.10638	1.04832	1.11645	0.560989	0.567409	0.827536	0.72153	0.91222	0.624	0.70967	0.85871	0.72759	1.68961	1.26199	1.97155
1.21407	1.00656	0.72963	0.84569	0.626631	0.739482	1.6528	0.53883	0.66407	0.65437	0.78234	0.70205	1.45085	1.77106	1.76089
0.86311	1.96827	1.05052	0.763419	0.65076	0.615343	0.72171	0.88947	0.80691	0.51299	0.63693	0.59772	1.00409	1.53747	1.679
1.06474	1.20522	0.95772	0.443565	0.566401	0.802449	0.49918	0.7375	0.74158	0.75514	0.61574	0.8418	1.68812	1.66249	1.67974
1.11276	1.62036	0.9145	0.762573	0.797857	0.496934	0.6965	0.7694	0.59694	0.7772	0.80211	0.64333	1.79559	1.63823	1.84026
1.07549	0.95	0.85596	0.910281	0.670599	0.810278	0.88858	0.74585	0.85641	0.78252	0.6119	0.6747	1.5022	1.19392	1.83369
1.00478	1.38036	0.90476	0.622013	0.538901	0.608538	0.81648	0.79325	0.80517	0.76277	0.73241	0.73452	1.62592	1.71224	1.7049
0.80945	0.9817	0.81084	1.36795	1.07485	0.443091	0.87904	0.63454	0.79009	0.83532	0.71473	0.4977	1.6927	1.72125	1.15285
1.16975	0.84855	0.84894	0.816094	0.826904	0.871111	0.91703	0.92221	0.79564	0.73289	0.87581	0.65801	1.67148	1.68505	1.93994
0.83342	0.795	0.62421	0.771831	0.594637	0.82251	0.87748	0.89584	0.92194	0.7094	0.63343	0.90416	1.93898	1.48036	1.16219
0.87883	0.84286	1.18079	0.689321	0.575725	0.505556	0.62189	0.93236	0.83531	0.6097	0.85986	0.78517	1.28019	1.66889	1.46454
0.95807	0.772	0.72578	0.898794	0.766345	0.356887	1.07643	1.49665	0.37419	1.07503	0.64089	0.80425	1.84131	1.58116	1.83262
0.86878	1.16924	0.90803	0.725133	0.376521	0.882177	0.76793	0.78763	1.49287	0.70319	0.8577	0.76217	0.63015	0.72533	1.51276
0.6806	0.90625	0.86594	0.409811	0.636777	0.780075	0.94698	1.49839	0.87723	0.65138	1.01371	0.8327	1.77603	1.12519	1.52778
0.90406	0.7537	1.07369	0.705815	0.673323	0.648069	0.97848	0.91218	0.92527	0.54792	0.90182	0.98344	1.45258	1.51505	1.61366
0.95119	0.79431	1.29918	0.402055	0.897718	0.782104	0.42877	0.83769	0.75597	0.76623	1.34811	0.77915	0.9977	1.67134	1.67978
0.93161	1.09193	1.75012	0.605867	0.506758	0.635345	0.78099	0.7929	0.76893	0.79566	0.65699	0.86706	1.10844	1.75018	1.82085
1.01344	2.04285	0.8995	0.676253	0.509623	0.551602	0.74668	0.65216	0.76013	0.65216	0.73562	0.88438	1.65081	1.50864	1.76936
0.69136	1.01036	1.04918	0.502356	0.690846	0.756531	0.94496	0.93396	0.86448	0.71539	0.87698	0.97085	1.73954	1.36978	1.66595
1.04241	1.82174	0.96097	0.383354	0.503785	0.882795	1.29077	1.26643	0.58095	0.86192	0.80364	0.67541	1.68154	1.94805	1.02594
0.75871	0.95442	0.53693	0.524185	0.831437	0.549193	3.4363	0.7923	0.83711	0.63646	0.65342	0.56423	1.26164	1.57712	1.6492
1.5139	0.89117	1.30798	0.722425	0.60609	0.46207	0.94544	0.86061	0.88602	0.62061	0.72665	0.6234	1.51504	1.62264	1.22982
1.49707	1.10016	0.79555	0.705703	0.725822	0.735429	0.59969	0.85023	0.98645	0.52025	1.08275	2.49029	1.60897	1.39575	1.5895
0.90299	0.78962	1.17372	0.430052	0.634044	0.588805	0.87411	0.91975	1.70178	0.92622	1.29821	0.73095	1.67248	1.96198	1.01263
1.13206	0.99904	1.0571	1.85506	0.692454	0.23907	0.78239	1.07374	0.95271	0.85005	0.93524	0.94658	2.2275	1.64762	1.95006
0.81177	1.04811	1.06823	0.657947	0.722998	0.772949	0.93625	0.82858	0.54378	0.71802	0.81628	0.7308	1.77875	1.81411	1.53507
0.99984	1.18742	1.05618	0.753099	0.665998	0.568136	0.93798	0.94007	0.50654	0.73377	0.81641	0.91384	1.84459	1.84138	1.85096
0.95715	0.87871	1.42284	0.345619	0.690347	0.822352	0.88883	0.84967	0.92465	0.78357	0.59061	0.45815	1.74452	1.76621	1.39022
1.14843	0.79151	0.97059	1.12912	0.686251	0.678733	0.7872	0.75897	0.95275	0.70817	0.90911	0.66924	1.4923	1.6961	1.81418
0.95365	2.38528	0.85084	0.369537	0.535253	0.394941	0.84793	1.00222	0.83321	0.98313	0.74925	0.50704	1.23681	1.78529	1.19129
1.01538	0.96267	1.07763	0.856239	0.538889	0.518887	0.7935	0.93349	0.84345	0.76692	0.56929	0.73148	2.34328	1.39919	1.07744
1.06862	0.57037	0.80165	0.455898	0.785691	1.49088	0.99509	0.79112	0.49585	0.81316	0.87232	1.15526	1.60946	2.08898	1.51431
1.14542	0.89935	0.83949	0.590775	0.286025	0.436363	1.1939	0.71454	0.83285	0.70251	0.95506	0.678	1.58871	0.2662	1.36491
0.99028	0.91222	1.78044	0.351811	0.415166	0.634976	0.82608	0.87946	0.61319	0.73753	1.0692	0.76424	1.43498	1.72179	1.7333
1.07658	1.00061	0.80733	0.523914	1.39375	0.674108	0.90248	0.73193	0.86729	0.70265	0.75807	0.76531	1.61541	1.89445	1.6038
0.99118	1.06803	4.62155	0.584488	0.611285	0.61662	0.68605	0.77937	0.79523	0.79686	0.85586	0.74664	1.21945	1.88186	1.29093
1.00858	0.95847	1.07195	0.629185	0.348879	0.646886	0.88825	0.9424	0.50724	0.52098	1.77991	0.38604	1.40164	1.61967	1.36516
1.14395	1.03576	0.87829	0.600964	0.539175	0.561119	0.84963	0.82495	1.28922	0.87651	0.87473	0.65688	1.41042	1.7743	1.62073
0.99857	1.00222	0.78386	0.699535	0.385529	0.481202	0.67664	0.67113	0.80232	0.708	0.36679	0.828	1.57898	1.31525	1.37715
0.8089	0.77987	1.1597	0.580123	0.418457	0.645326	0.71139	0.92241	0.84652	0.74525	0.76677	0.78726	1.40676	1.41644	1.60645
1.07911	0.68534	1.05012	0.581116	0.674351	0.70924	0.88278	0.74443	1.02141	0.62037	0.83886	0.75692	1.55593	1.471	1.70265
1.218	0.99738	1.04954	0.813857	0.670405	0.672364	0.83672	0.7457	1.19568	0.57283	0.77416	0.71508	1.44255	1.80948	1.42475
1.0131	1.74477	0.91056	0.986643	0.950721	0.670013	0.74285	0.64838	0.91281	1.99802	2.49529	0.7829	1.1603	1.17001	1.72141
0.97958	0.9593	1.07546	0.76134	0.764199	0.592495	0.94289	1.65541	0.78375	0.74715	0.57568	0.62051	1.57461	1.52748	1.87913
1.23643	1.07889	0.78579	0.651744	0.587752	0.927162	1.18451	0.78639	0.40809	1.19762	0.53142	0.92085	1.23142	1.58906	1.01708
1.09975	0.95307	0.97701	0.595749	0.688624	0.623822	0.99856	0.88753	0.78395	0.78772	1.25886	1.46373	1.64873	1.68657	1.10354
1.09499	1.09628	0.77552	0.650187	0.932418	0.602983	1.13517	0.87443	0.80236	1.83672	0.7031	0.47851	1.62902	1.46708	1.67178
0.71091	0.90377	0.73464	0.425323	1.08432	0.53682	0.94511	0.61844	0.4775	0.75802	0.86897	0.79933	1.29876	1.68604	1.54542
1.10671	1.1846	0.98561	0.589953	0.704906	0.768116	0.73695	0.91667	0.70557	0.89681	0.71331	0.67992	1.80499	1.32131	1.69017
1.16813	2.4579	0.83995	0.504622	0.874656	0.623823	0.88969	0.75982	0.53477	0.73717	0.81938	0.63505	1.55308	1.49329	0.97787
0.88475	1.00524	0.97375	1.01277	0.754691	0.608272	0.78436	0.91469	0.61497	2.27598	0.8779	1.04212	1.5654	1.31244	1.6924
0.9618	1.01596	1.04031	0.454734	0.484151	0.698882	0.84995	0.92779	0.47377	1.59499	0.88372	0.90874	1.89763	1.35756	1.46628
0.97796	1.0694	0.96528	0.625081	0.368848	0.611588	0.77247	0.79196	0.73195	1.04294	0.66171	0.53348	1.58796	1.31535	1.61939
0.73053	1.01429	0.66859	0.600366	0.693751	0.658126	0.80469	0.5919	0.67192	0.45587	1.42855	0.57802	1.74071	1.66061	1.78628
0.99175	0.63365	0.88703	0.330473	0.558493	0.724094	0.72894	0.71783	0.93344	0.74765	0.84994	0.94725	1.43096	1.78605	2.06804
1.08291	2.80917	0.7214	0.635352	1.84858	0.716622	0.88783	0.81039	0.81152	0.6681	0.85007	1.7197	1.52145	1.41579	1.85948
1.16072	1.23113	0.90043	0.773153	0.372868	0.813316	0.56525	0.68064	0.64659	1.8049	0.73811	0.71472	1.64241	2.5362	1.34078
0.6134	0.83983	1.02312	0.470202	0.982937	0.681859	0.78621	1.49888	0.82309	0.88388	0.93398	0.78091	1.75116	1.48321	1.4199
0.96562	0.88935	0.86569	0.690317	0.80936	0.937841	1.69845	0.94216	0.85601	0.82918	0.67211	0.76382	1.20543	1.5799	1.38967
1.11456	1.23625	1.1326	0.688892	0.827642	0.553108	1.96608	0.97832	0.93524	1.1051	0.96533	0.87668	1.83757	1.54785	1.29936
0.84829	0.6639	1.01641	0.718007	0.730278	0.527491	0.80447	0.92953	0.92919	0.79494	0.78179	0.76076	1.32545	1.57043	1.76226
1.10806	1.11118	0.96792	0.600495	0.842425	0.493595	1.20117	0.68717	1.0159	0.75711	0.76307	0.79379	1.29074	1.73555	1.13201
1.29032	1.05422	1.05883	0.693548	0.966848	0.604842	1.12217	0.66157	0.86606	0.51018	0.87098	0.79956	1.77094	1.57432	1.40623
0.85913	1.06796	0.76109	0.729551	0.544475	0.551358	0.77175	0.61705	1.55629	0.85546	0.86097	0.94977	1.91337	1.99324	1.38508
0.8825	1.11803	1.04044	0.402114	0.479299	0.558545	1.825	0.71354	0.73472	0.84488	0.89463	0.83329	1.3878	1.74519	1.35496
1.23705	1.044	1.22948	0.710933	0.538305	0.832273	0.88444	0.85142	0.94637	0.97636	0.82022	0.87863	1.48538	1.8842	1.94566
0.89	1.13137	1.40633	0.616375	0.597714	0.544162	0.82861	0.81616	0.81448	0.59528	0.70779	1.45406	1.27861	1.78451	1.4705
0.76581	1.65002	1.05988	0.360608	0.926297	0.606137	0.86607	0.38578	0.60944	1.732	0.84718	0.52424	1.81998	1.94057	1.58385
0.93091	1.29612	0.90638	0.719919	0.375007	0.686364	0.93491	1.59425	0.96108	0.95817	0.76135	0.86002	1.58515	1.99353	1.85284
0.98409	2.53132	0.89063	0.690926	0.578909	0.524554	0.95413	0.59324	0.79726	0.76469	0.75242	0.92644	1.54335	1.64575	1.34966
0.9205	1.31562	0.9541	0.767739	3.22513	1.20813	1.14178	2.72579	0.83416	1.02495	0.59269	1.04202	1.20663	1.48509	1.58196
1.10943	1.06439	1.01782	0.809457	0.719866	0.493486	0.82551	0.85007	0.62716	0.93578	1.88724	0.80666	1.64526	1.50205	2.0618
2.11813	0.87745	0.94767	0.205481	0.592402	0.567576	0.61025	0.74084	0.72341	0.94348	0.8646	2.01263	1.49746	1.92327	1.83359
1.21853	0.87483	0.69182	0.77482	0.766834	0.898105	0.62821	0.87535	0.66051	1.16723	4.20524	0.8273	1.25052	1.8564	1.74656
1.23399	0.80449	1.00416	0.755982	0.769804	0.764955	0.66932	1.0268	0.78498	1.03927	0.68862	0.74137	1.24811	1.74976	1.78506
1.07711	0.8065	0.94736	0.858897	0.584317	0.579132	0.68415	0.7728	1.05125	0.95093	0.57555	0.63037	1.67493	1.50077	1.89697
1.22356	0.80015	0.84	1.67243	0.575359	0.427404	0.51099	0.65532	0.85137	0.83442	0.53069	1.00055	1.26424	2.3533	1.4845
1.60972	0.75537	0.78986	0.664756	0.538524	0.579596	0.66459	0.64554	0.87395	0.71422	0.75688	0.69114	1.74082	1.51112	1.40837
2.30016	1.05193	0.96738	0.931822	0.63999	0.74691	0.82728	1.18877	0.9517	2.2444	0.81485	0.84314	1.43317	1.74276	1.78865
1.13516	1.11884	1.09392	0.699399	0.669281	1.24347	1.74045	0.95057	0.31348	1.70217	0.92248	0.71882	1.41332	1.23515	1.3128
2.05305	0.83206	1.2016	0.811829	0.739276	0.748265	0.84991	0.62365	0.78328	0.82395	0.9479	0.58516	1.86697	1.70995	1.59695
1.05243	1.32164	0.71167	0.566053	1.33584	0.420482	0.77377	0.81885	0.83233	0.65534	0.74369	0.81898	1.67651	1.81336	2.90415
0.82761	0.70976	0.79152	0.575652	0.557482	0.607542	0.73322	1.08378	0.86075	0.65332	0.56143	0.54866	1.05903	1.53045	2.1275
1.23725	0.9218	0.93002	0.6618	0.173976	0.785437	0.69899	0.70208	0.72577	2.21839	0.82598	0.84458	1.18609	1.60171	1.72603
0.91477	0.87008	0.67255	0.445239	0.302885	0.340361	0.70324	0.74169	0.99687	0.64054	1.06477	0.77149	1.76204	1.50158	1.98375
1.35235	1.02282	0.88381	0.459582	0.56594	0.599636	0.96627	0.36407	0.78329	0.85835	0.64164	0.59103	1.29808	2.06223	1.32584
1.09199	0.86436	0.73339	0.569976	0.797653	0.647719	0.73014	0.5783	0.68867	0.78104	0.63501	0.73816	1.3283	1.78572	1.71926
1.01706	0.85385	0.91359	0.652365	0.746594	0.386232	0.78809	0.70465	0.71512	0.60928	0.78546	0.74531	1.4364	1.25795	1.48906
1.15676	0.77942	1.21517	0.565916	0.56545	0.899931	1.02572	0.77438	0.83031	0.68663	0.51628	0.82748	1.41717	1.23652	0.9219
0.71095	1.05918	1.19354	0.569103	0.660954	0.318973	0.74089	0.70187	5.05447	0.90894	1.09807	0.87417	1.63814	4.2125	1.54976
2.11022	1.1415	0.87432	0.604697	0.647575	0.235249	0.9444	0.8386	0.84899	0.75275	0.86097	0.64815	1.59864	1.5496	1.50291
1.11076	0.8065	0.72811	0.522459	1.05923	0.782464	0.65319	0.71296	0.91909	0.61237	0.79441	0.89739	3.36629	1.63703	1.56707
2.09854	1.12161	1.64831	0.595421	0.839549	0.564241	0.86505	0.71877	0.6904	0.93472	0.76891	0.85548	1.50972	1.49344	1.59265
1.15077	1.11177	1.94181	0.697437	0.694425	0.665546	0.87722	0.97452	0.83555	0.74635	2.45139	0.71619	1.45042	1.40791	1.38781
1.19347	1.00592	0.95948	0.948216	0.564253	0.758555	0.89859	2.35525	1.06674	0.59807	0.81597	0.79311	1.21694	1.57687	1.44309
0.83059	0.74537	1.53215	0.582322	0.697058	0.766989	1.10508	0.88659	0.66404	0.92066	0.67456	0.80319	1.46089	1.63821	1.21279
0.84263	1.03058	1.55573	0.4121	0.732438	0.657678	0.94816	0.91536	1.21657	0.68505	0.6679	0.88678	1.50951	2.02521	1.23927
1.35231	1.0595	1.08939	0.642645	0.525713	0.665328	0.6151	0.77014	0.82509	0.82924	0.74496	0.6056	1.57692	1.57575	1.54759
1.15496	0.80096	0.88083	1.75191	0.686011	0.872085	0.87836	0.73032	0.75586	0.67702	0.8816	1.20336	1.41738	1.91323	1.81546
0.55865	0.57453	1.09105	0.717553	0.297514	0.723408	1.05908	1.99709	0.69355	0.87565	0.93916	0.99556	1.36888	1.59423	1.65896
0.96141	1.04468	0.9086	0.871605	0.925732	0.567759	0.756	0.65198	0.54905	0.74082	0.77908	0.7763	1.57665	1.32151	1.34223
0.91898	0.96742	1.04262	0.824035	0.633421	0.501797	0.85722	0.75012	0.75605	1.87304	0.6392	0.86234	1.43114	1.64751	1.64938
1.0509	0.88829	0.7158	0.545618	0.612876	0.74661	0.69201	0.97082	0.73398	0.88674	0.89601	0.99816	1.43117	1.63073	1.38314
1.00627	0.90119	0.92302	0.699762	0.84692	0.789843	0.46398	0.95269	1.08455	0.83807	0.76619	0.92088	1.49399	1.71821	1.90776
1.05336	0.88396	1.08262	0.559426	0.698779	0.79051	0.95115	0.75729	0.64597	0.80026	0.82819	0.5816	1.55822	1.57841	1.84136
1.46538	0.90052	1.04665	0.633602	0.672935	0.633765	0.69789	0.79649	0.91452	0.83381	0.9556	0.79282	1.13248	2.07147	1.91565
1.17168	0.89356	0.63802	0.713438	0.55271	0.418552	0.72063	0.98861	1.37078	0.71029	0.7356	0.97707	1.40862	1.62451	1.6005
0.96633	0.78138	1.2614	0.815383	0.625378	0.649668	1.09255	0.66437	0.77461	0.65552	0.65478	0.51341	1.63974	1.74224	1.71542
0.99937	1.09992	0.9807	0.500038	0.66664	0.647035	0.22159	0.94289	0.80307	0.5817	0.86861	0.75429	1.6491	1.75881	1.48599
0.98186	0.69405	1.1189	0.547151	0.393788	0.709808	0.78216	1.12793	0.71392	0.68731	0.90422	0.90183	1.68652	1.70953	1.77864
1.17499	1.08336	0.92636	0.669647	0.871598	0.817952	0.95979	0.8291	0.85866	1.25544	1.47078	0.83302	1.70672	1.03858	1.2579
0.72701	2.10891	0.96506	0.500922	0.835919	0.529357	0.6544	0.67726	0.69018	0.60046	0.83459	0.70119	1.10223	1.86012	1.39736
2.52423	1.21375	0.84675	0.610514	0.811114	0.671611	0.75138	0.97958	0.84835	0.65641	0.63605	1.12329	1.47986	1.64189	1.41327
0.94578	0.84759	1.07651	0.602503	0.630671	0.497125	0.8084	0.91735	0.71735	1.51648	0.7695	1.39668	1.65003	0.9526	1.31261
0.86412	0.94345	0.96036	0.82894	1.1996	0.312748	0.94233	0.64843	0.741	0.46146	0.67327	0.86339	1.45761	1.13142	1.62591
0.83277	0.89584	0.94944	0.371567	0.484417	0.623407	0.82053	0.72411	0.9555	0.89376	0.81989	0.79572	1.42404	1.29754	1.187
1.17834	2.60409	2.12031	0.661389	0.69588	0.455537	0.88857	0.87607	0.72893	0.98568	0.7284	0.86037	1.4636	1.47572	1.71432
1.29045	2.16363	1.11649	0.390423	0.665344	0.473267	0.82628	0.54173	0.77624	0.80235	0.83496	0.73953	1.22584	1.65167	1.56885
1.14385	0.8446	0.87397	0.433276	0.688254	0.471517	1.53639	0.8019	0.66519	1.62346	0.5008	0.88639	1.89227	1.55063	1.65137
0.94475	0.67168	1.27333	0.528362	1.13192	0.640465	1.02292	0.87644	1.24179	0.55814	0.69894	0.99796	1.66367	1.98564	3.64403
0.83848	1.67388	1.05727	0.72338	0.779628	0.700245	0.70852	0.91979	0.91114	0.72846	0.57046	1.02276	1.62609	1.54428	1.5216
1.08123	0.79158	0.99152	0.431503	0.606729	0.690813	0.86786	1.0925	0.86741	0.92814	0.82567	1.13643	1.67173	1.88561	1.95884
0.99227	1.04608	1.09104	0.760397	0.862123	0.546842	0.93152	0.89164	0.86532	0.74583	0.69679	0.73638	1.49825	1.50504	1.2479
0.92863	1.0026	1.08838	0.356094	0.501162	0.585826	0.58028	0.88673	0.79227	0.74828	0.6344	0.62028	2.08652	1.72519	0.90112
2.29607	1.10862	0.87883	0.778063	0.46385	0.908054	0.93993	0.64932	0.94688	0.71314	0.73739	0.66371	1.69407	1.69038	1.89627
1.17727	1.04884	0.7319	0.338126	0.742391	1.73156	0.72425	1.84793	0.65509	0.64736	0.84846	0.75105	1.56473	1.86282	1.688
1.34943	1.0221	0.87707	0.417154	0.667239	0.639197	0.86134	0.75013	1.15393	0.35413	0.73198	2.25066	1.01868	1.53398	1.43737
1.14296	0.70588	0.88795	0.145084	1.61831	0.470744	0.95626	0.70262	0.86119	1.00461	0.73816	1.10607	0.96425	1.65716	1.53257
1.04807	1.29223	0.75879	1.07596	0.730721	0.607062	0.91084	0.8685	0.93232	0.63248	0.81614	0.87245	1.49638	1.83575	1.50878
1.14436	0.67316	0.80677	0.795596	0.541836	0.872313	0.87685	0.72595	1.07499	2.85097	2.22723	1.49334	1.45666	1.82324	1.73359
1.45167	0.96407	0.72444	0.988279	0.970719	0.364967	1.12206	0.83533	0.75711	1.08154	0.69038	0.68913	1.56276	2.01532	1.74296
1.11407	0.84331	1.75408	0.569591	0.675502	0.864826	0.89655	0.98738	0.81626	0.84626	0.66194	0.88044	1.74402	1.38849	1.7002
1.07578	0.97705	1.1069	0.303912	0.70181	0.630076	0.63539	1.04358	0.53395	0.91095	0.67383	0.55203	1.65965	1.75242	1.74048
0.78431	0.83475	0.83225	0.558342	1.02945	0.656751	0.81537	0.72025	1.02523	0.87347	0.45815	0.74855	1.41786	1.77565	1.74601
1.08057	0.73751	0.96911	0.619267	0.437288	0.660695	0.8284	0.81255	0.63555	0.7089	0.99984	1.64212	1.0764	1.57536	0.9255
1.04473	0.77452	1.04085	0.335218	0.692082	0.810586	0.85088	0.82129	0.86053	0.79273	0.70447	0.60815	1.32396	1.18191	1.89081
0.92428	1.02357	1.06856	0.294872	0.50226	0.810672	1.43041	0.85783	0.67606	0.9103	0.76223	0.57725	1.74217	1.62962	1.82387
1.28617	1.15187	1.18301	0.562495	0.537049	0.487788	0.64221	1.63338	0.93478	0.72857	1.443	0.9072	1.70463	1.97567	1.29733
1.00903	2.02532	1.85159	0.720503	0.550575	0.56358	0.84327	0.84688	0.74755	0.95684	0.60718	2.23852	1.64442	1.38877	1.48701
0.86259	0.67439	1.12173	0.538402	1.11168	0.517219	0.77777	0.78924	0.70187	1.73294	0.61842	0.83642	1.57181	1.2492	1.71071
0.88812	0.85692	0.75841	1.51288	0.589662	0.58151	0.74152	0.8379	1.00013	0.71543	0.84574	0.7917	1.52476	1.84321	1.58792
0.81927	0.97804	1.18903	0.542565	0.553301	0.660345	0.77257	1.6996	0.5481	0.69613	0.81862	0.65243	1.5884	1.74319	1.74301
0.8716	0.7231	0.99082	0.666004	0.647294	0.678954	0.81996	1.25415	0.75213	0.59842	0.90362	0.7644	1.73227	1.6886	1.42271
0.84352	2.44204	1.07724	0.458725	0.723995	0.644458	0.662	0.74667	0.64659	1.07824	0.48254	1.00002	1.70268	1.10162	1.73338
1.24888	1.22708	0.88613	0.606203	0.744544	0.581079	0.94212	0.67072	1.33224	0.59366	0.71964	0.82675	1.70657	1.69668	1.61872
2.63087	1.01802	0.95181	1.48104	0.713035	0.771919	8.25098	0.64973	0.73588	0.65224	0.82005	0.65179	1.75514	1.59096	1.72225
1.38826	1.27086	0.92791	0.729496	0.947834	1.32483	0.62918	0.80501	0.47997	1.16126	1.06936	0.54142	1.9194	1.76632	1.34
0.89469	1.87666	0.93835	0.546383	0.552314	0.825176	0.91848	0.92172	0.77527	0.7953	0.91848	0.60112	1.65412	1.80755	1.87936
1.151	1.07864	0.82624	0.490752	0.442434	0.859334	1.61623	0.79434	0.56638	0.79408	1.61272	0.40569	1.86599	1.69452	1.31538
1.1092	0.72411	0.99748	1.52628	0.646501	0.684302	0.86762	0.96434	0.76477	0.76603	0.54424	1.84293	1.33373	1.20931	1.5413
5.23782	0.72822	0.71333	0.386781	1.65905	0.75728	0.82749	0.90539	0.97733	1.07755	0.90276	0.8906	1.60397	1.54799	1.53622
1.07175	1.37828	0.8929	1.05136	0.570109	0.777535	0.73858	0.84091	0.78652	0.846	0.64035	1.22356	1.47952	1.6882	1.49127
1.15622	0.76382	0.79231	0.312991	0.714996	0.497592	0.7623	2.41853	1.3762	1.07913	0.59518	0.61335	1.38954	1.50464	1.13463
0.94315	0.81884	1.52624	0.563271	0.569459	0.553571	0.81006	0.72894	0.64927	1.5307	0.81899	0.71569	0.27612	1.67699	1.45198
1.87099	1.10564	1.43404	0.529138	0.684495	0.731462	0.54695	0.77939	0.85343	0.82782	0.93267	0.97657	1.69604	1.66644	1.60936
1.09189	0.91047	0.76973	0.822162	0.377652	0.672101	0.67572	0.88885	1.12564	0.87137	0.59341	0.57469	1.45495	1.9094	1.62911
0.93755	1.02758	1.01974	0.744699	0.774813	0.515072	1.00914	0.81009	0.82498	0.83036	0.45153	0.76645	2.04696	1.53484	1.69267
1.14334	0.97601	0.74464	0.43312	1.86685	0.670986	1.07643	1.17293	0.79522	0.94334	1.35914	0.94062	1.61809	1.08615	1.29619
1.01593	1.08132	0.9612	1.07934	1.06782	0.728907	1.22006	0.74538	1.15242	0.87464	0.77574	1.18896	1.06466	1.56	1.6413
1.5819	1.43477	0.86635	0.811253	0.546107	1.1826	0.86636	0.41293	0.89856	0.69838	0.62075	0.86224	1.79416	2.04629	1.51187
0.95942	1.52284	0.95849	0.558759	0.635875	0.552818	0.89034	0.71815	0.71189	1.02689	0.83465	0.75061	1.47528	1.53199	1.60223
0.80651	1.23009	0.90736	0.583794	0.512478	1.0509	0.98972	0.67124	0.62882	0.79006	1.13784	1.26195	1.6967	1.31692	1.33978
1.21911	0.96622	0.92039	0.3784	0.890498	0.431528	1.51926	1.43774	0.72741	0.88627	0.99127	0.77386	1.61577	1.67048	1.59551
1.42928	0.82814	0.95281	0.559705	0.625991	0.540096	0.60918	0.7198	0.99768	0.59322	0.86874	0.76487	1.8414	1.63569	1.70045
1.0698	1.20465	1.07554	0.675203	0.557412	0.617851	0.67518	1.12784	3.89915	0.87793	0.75976	2.53385	1.74736	1.09801	1.22207
1.3015	1.01019	0.87373	1.11961	0.70789	0.625781	1.0203	0.71081	0.50535	0.99144	0.88558	0.83804	1.76409	0.93305	1.85281
1.07824	0.79803	0.80887	0.565483	0.44224	0.484081	1.55482	0.57986	0.68242	2.27152	0.88101	1.40471	1.57458	1.49362	1.85696
0.88596	1.10372	0.93085	0.44155	0.622449	0.779774	0.93767	0.60068	0.90401	0.89667	0.83648	0.66311	0.9885	1.37975	1.73293
0.91204	1.39154	1.39068	0.603383	0.855879	0.439053	0.87753	2.4242	0.82977	0.72275	1.21963	0.63807	1.80428	1.46111	2.2162
1.09073	0.89069	1.15312	0.656372	0.747886	0.673967	0.96583	1.38611	1.52119	0.74578	0.73307	0.91686	1.86523	1.45412	1.75543
0.98838	0.76902	0.93983	0.699393	0.52138	0.570484	0.86874	0.63962	0.91201	1.08959	2.37966	0.7637	1.50288	1.74538	1.42959
1.3019	0.97433	0.73194	0.569001	0.698187	0.543493	0.71079	0.75453	0.88153	0.77023	0.98265	1.09926	0.73628	1.85541	1.23606
0.95986	1.30623	0.61915	0.790708	0.658414	0.511741	0.77116	0.57477	0.90369	0.68763	0.73586	0.79735	1.46581	1.55045	1.59961
0.84267	0.93913	0.97157	0.90531	0.610683	0.705158	0.83947	0.72915	0.64591	0.9429	0.81108	0.93096	1.75574	1.92009	1.35841
1.05488	1.06274	0.90465	0.537439	0.622016	0.663387	0.95058	0.61009	0.8702	0.76429	0.93947	0.68857	1.86718	1.72664	1.89442
1.08349	0.83441	0.75286	0.314486	0.600756	0.5187	0.65619	0.77548	0.701	0.69269	0.87413	0.55555	1.47549	1.76541	1.21638
0.91027	0.91164	1.0615	0.62125	0.626051	0.572149	0.7579	0.72442	0.78502	0.89616	0.96328	0.7509	1.27254	1.91333	1.26695
1.03331	1.04299	0.84167	0.635873	0.62042	1.15814	0.47318	1.28351	0.71637	0.93809	0.88888	1.77548	1.08845	1.29657	1.81855
0.79218	1.03727	1.043	0.549214	0.492191	0.60727	0.70324	0.71829	0.74581	2.16029	0.8741	1.23677	1.64385	1.1914	1.60325
1.43176	1.00897	0.83666	0.639996	0.786556	0.71889	0.91576	0.79769	0.84487	0.61855	0.72439	0.92255	1.64549	1.82643	1.59695
1.25577	0.92492	0.75599	0.837924	0.600206	0.688162	0.8521	0.71994	0.78894	0.61223	0.78975	0.93563	1.11083	0.96215	1.29639
2.13322	1.0412	0.91487	1.24679	0.632129	0.61801	0.95449	0.48584	0.41284	0.93144	0.84642	0.95883	1.70029	1.60191	1.59304
1.55653	1.07132	1.55921	0.796651	0.588495	0.794834	1.85722	0.8241	0.73055	2.52347	0.48455	0.72414	1.62628	1.58312	1.79773
1.42701	0.71891	0.64811	0.497551	0.490574	0.512961	1.13482	0.81076	0.76762	0.7304	0.8781	2.03725	1.36805	1.56035	1.84601
2.35047	0.90735	0.8158	0.60993	0.5813	0.365132	1.00892	0.828	1.27686	1.01718	0.88411	0.90334	1.75188	1.62067	1.59258
1.12671	1.98307	1.24051	0.724179	0.506674	0.835543	0.63484	0.80761	0.84306	0.92646	0.63957	0.71264	1.74194	1.86696	1.89837
1.07407	0.72918	1.04425	0.564983	0.55139	0.635995	0.77549	0.92927	0.59153	1.07976	0.79527	0.68293	1.93892	1.56736	1.27259
0.7582	1.61121	1.07343	0.786641	0.783721	0.69847	0.41188	1.08424	0.79195	0.54186	0.72408	0.54478	1.66138	1.24882	1.54432
1.31169	1.85318	0.9443	0.718956	0.526554	0.816166	0.57372	0.88269	0.59836	0.85061	0.82196	0.81317	1.7182	1.64279	1.38979
0.7401	1.2533	1.20288	0.568157	0.613611	0.78337	0.9296	0.71596	0.59242	0.49688	0.74683	0.68322	1.79648	1.38104	1.32922
0.93283	1.0563	1.26204	0.835338	0.758364	0.692485	1.4485	0.68826	0.86542	0.95056	1.24175	0.65751	1.80933	0.62712	1.87366
0.86673	0.94955	1.2199	0.782679	1.19605	0.605857	0.79155	0.54146	0.75004	0.80807	0.70394	0.94495	1.53698	1.74205	1.75912
2.33317	1.0467	0.83333	0.649631	0.438469	0.417972	0.81657	0.84552	1.01817	0.76211	0.92925	1.20326	1.7011	1.23183	1.52182
0.77875	0.72481	0.70452	0.448312	1.22672	0.644796	0.82839	1.03318	0.70552	0.72023	0.81837	0.80739	1.67538	1.89206	1.52981
0.65314	0.84315	0.92326	0.763345	0.816573	0.7356	0.96175	0.63678	1.11445	0.592	0.98625	0.92787	1.59974	1.52228	1.69819
1.17967	0.94171	0.93364	0.675693	0.422903	0.644507	1.06587	0.77555	1.0237	0.65924	0.58499	1.26459	1.73185	1.04784	2.04839
0.9156	0.91437	0.86025	0.705421	0.659349	0.503241	0.98022	0.85835	1.22951	0.47363	0.8554	0.78917	1.85625	1.65882	1.06989
0.92463	0.6519	0.90419	0.541009	0.635644	0.730319	0.53935	0.866	0.97477	0.83645	0.71254	0.74557	1.27371	1.73314	1.16068
1.13489	1.20565	1.01518	0.579167	1.17137	0.89446	1.02635	0.88748	0.82687	0.73214	0.76871	0.88342	1.86796	1.20445	1.78322
1.1225	0.9477	1.02468	0.588107	1.31635	0.82227	0.8618	0.85464	0.84496	1.8248	0.83944	0.93743	1.1833	1.28207	1.77031
1.27527	1.58532	1.06653	0.470684	0.558543	0.880693	0.90005	0.74712	1.20065	2.01946	0.54234	0.71895	1.50963	1.4501	3.52
1.02659	1.35192	0.70831	0.201036	0.681093	0.776256	0.40004	1.0033	0.70825	0.34977	0.81405	0.91823	1.27459	1.83495	1.36241
1.13854	1.10456	0.82415	0.853528	0.754352	0.327801	0.58079	0.96873	0.94951	2.13194	0.56018	0.58713	1.61186	1.99005	1.10766
0.92427	1.1653	0.89516	0.694329	0.444952	0.734352	0.75162	0.79699	0.68144	0.67041	0.62753	1.15175	1.43837	1.45452	1.44899
0.93467	0.99765	0.86206	0.666269	0.618451	0.392367	0.51801	1.03074	0.88014	0.64773	1.7815	0.83791	1.81073	1.24976	1.7292
0.99771	0.92313	1.00399	0.623174	0.821017	0.705081	0.99552	0.80845	0.96624	1.08721	0.68021	0.75444	1.67033	1.83612	1.74013
0.85897	1.04446	0.66002	0.483829	0.600726	0.808639	0.75839	0.70852	0.65987	0.90643	0.70122	0.72209	1.72674	1.53026	1.62174
3.08253	1.38422	0.9276	0.555115	0.297254	0.789657	0.82616	0.81833	0.81551	1.38105	0.79666	1.76047	1.26387	1.83724	1.26129
1.3588	1.24359	0.93094	0.657703	0.522129	0.916263	0.72089	1.01022	0.63233	0.67567	0.96801	0.6806	1.75914	1.32152	1.50053
0.92197	0.99636	0.59242	0.467073	0.750539	0.861472	0.71973	0.72942	0.51287	0.80144	0.43102	2.16408	1.63555	1.74753	1.58948
1.3306	1.02861	0.57736	0.485839	0.497454	0.450836	0.85977	0.68287	1.23324	0.88419	2.23617	0.92347	1.40563	1.66672	1.70136
1.6697	0.74601	0.8006	0.798264	0.567928	0.53956	0.77626	1.01162	1.0184	1.91653	0.92025	0.78511	1.62809	1.57784	1.59452
1.17719	0.83818	0.80848	0.385566	0.709592	0.617106	0.66263	0.68951	0.75473	0.82497	0.71929	0.90406	1.91208	1.39664	1.65971
0.97832	1.1034	0.94616	0.509363	0.782172	0.768395	1.71859	0.49337	0.92949	0.60399	0.61522	0.83353	1.53664	1.81416	1.72772
0.76187	1.03191	1.01195	0.591186	0.636127	0.507599	0.74922	0.82592	1.0688	2.66266	0.99365	0.82259	1.31797	1.59881	1.42026
0.99523	0.9866	1.01769	1.2391	0.235598	0.689213	0.42317	0.63131	0.87162	0.42945	0.95168	0.80316	1.6233	1.54769	1.41639
1.00219	1.01737	0.81801	0.996808	0.482458	0.508318	0.49624	0.91888	0.71406	0.6972	0.67039	0.79755	1.89089	1.62097	1.59749
0.75931	0.84023	0.93273	0.38312	0.38029	1.4077	0.71425	0.89328	0.58085	0.81104	0.85666	0.68208	1.69839	1.7999	1.1565
1.22844	0.86552	0.99891	0.702267	0.656229	0.560286	0.94764	1.30036	0.80034	0.92013	0.97417	0.7461	1.25269	1.22535	1.52012
1.16078	1.27865	0.82621	0.497573	0.607582	0.605328	0.94329	0.65907	1.00619	0.7214	0.65024	0.75246	1.79705	1.52855	1.06091
0.98289	0.78899	1.44093	0.499634	0.664811	0.403526	0.83151	0.83242	0.71503	0.8049	0.74708	0.6898	1.62718	1.36528	2.05187
1.17662	0.85125	0.96244	0.489656	0.741109	0.674067	0.91139	0.69436	0.98276	0.6858	0.84056	0.95317	1.81542	1.43107	1.45947
0.80494	0.87314	0.71375	0.841683	0.723438	0.843637	0.7581	1.01206	0.57692	2.09425	0.84856	0.51705	1.79694	1.45113	1.39818
0.92489	0.72545	0.90042	0.683646	0.615807	0.435457	0.86436	1.03814	1.54535	1.39541	1.61427	0.92605	1.58262	1.42891	1.60335
0.73044	1.12211	0.40606	0.415584	0.584378	0.418571	0.92206	1.09013	0.67742	0.65049	0.75077	1.01471	1.77479	1.74967	0.98802
1.28749	1.10579	1.39667	0.90821	0.574033	0.576933	0.64195	0.74769	0.90458	0.72738	0.8467	0.72591	1.10399	1.82551	1.4535
1.19867	1.04529	1.45343	0.668067	0.628501	0.801541	0.79733	0.85718	0.26042	0.88454	0.44325	0.97312	1.82508	1.44123	1.5718
1.06813	1.12749	0.89579	0.726146	0.56685	0.671128	1.01754	0.98088	0.78508	0.87232	0.76763	0.92098	1.30047	1.51129	1.82522
0.93383	0.98311	1.09567	0.670498	0.720012	0.695751	2.29208	0.80364	0.94827	0.64821	0.79425	0.65209	1.90155	1.43287	1.09938
1.15294	0.63598	0.87151	0.758098	0.765909	0.738778	0.61924	1.06715	0.7534	0.70623	0.91633	0.83633	1.63584	1.71262	1.20524
0.75671	1.83164	0.76896	3.56592	0.884728	0.650787	0.64036	0.69688	0.7653	0.82416	1.89714	0.83566	1.63842	1.71547	1.6924
0.90237	1.05217	0.78352	0.695199	0.732023	0.791493	0.83725	0.78718	0.72614	0.82357	0.82844	1.32413	1.1489	1.78512	1.46971
1.80449	0.9691	0.91751	0.835038	1.36124	0.647003	1.00158	0.57852	0.81688	0.65895	0.97445	2.905	1.9224	1.57172	1.75104
1.05257	0.91498	0.80585	0.467001	0.572493	0.987586	0.89812	0.8257	0.74342	0.69464	0.86832	1.95373	1.38732	1.54695	1.25808
1.00692	0.98393	0.97153	0.451228	0.716613	0.533183	0.76768	0.83163	0.67361	0.58581	0.97208	0.83176	1.7482	2.45087	1.37755
0.93316	0.71158	1.05985	1.384	0.707061	0.598171	0.63545	0.92209	0.59092	0.62286	0.8743	0.83168	1.84965	1.76135	1.40119
0.4771	0.89539	0.9524	0.610208	0.450747	0.661692	0.80944	1.08914	0.98174	0.64878	0.86535	0.87698	1.25278	1.48348	1.75154
0.71971	0.94586	0.76281	0.41031	0.778919	0.605485	0.76938	0.77163	1.07885	0.58408	0.67978	1.50534	1.45166	0.31591	0.68602
2.4024	0.89637	1.07071	0.641859	0.567031	0.941599	0.90417	1.34564	0.27435	0.51341	0.84124	0.66383	1.85528	1.00147	1.90554
1.33987	1.18272	0.94883	0.604057	0.705348	0.569878	0.77659	0.68339	1.77751	0.9172	0.82975	0.68121	1.74409	1.49632	1.62612
1.11881	0.9278	0.84672	1.55851	1.39922	0.60282	1.76761	1.42066	0.87751	0.78581	0.67098	0.74892	1.44129	1.51421	1.65202
0.88142	0.90027	0.97008	0.349104	0.691458	0.986799	1.55661	0.46056	1.34862	0.59994	0.89599	0.96422	1.54101	0.98207	1.55991
0.84373	0.89018	1.5077	0.526808	0.413682	0.880384	0.52361	0.97464	0.72952	0.89017	1.52355	0.88298	1.34925	1.62372	1.66708
0.8372	0.54599	1.03058	0.724909	0.627194	0.54002	0.9546	0.73044	0.64175	0.8175	0.93605	0.75751	1.08003	1.128	1.77108
0.86422	0.91448	0.63786	0.495835	0.63988	0.544635	0.93334	1.64419	0.54932	0.49341	0.77583	0.71255	1.58065	1.49136	1.71405
0.74016	1.09555	0.86519	0.740763	0.572387	0.465278	0.61072	0.90171	0.81192	0.72008	0.74403	0.72658	2.07574	1.40835	2.25079
0.89509	0.6147	1.01429	0.400949	0.793461	0.766906	0.78075	0.68632	1.1076	0.66472	0.76521	0.76751	1.59011	1.61727	0.53601
1.08931	0.94138	1.19178	0.496829	0.799276	0.489504	0.60189	0.66439	1.19198	0.53749	1.02572	1.69477	1.89388	1.83581	1.4481
1.14653	1.03005	0.89276	0.854257	0.661755	0.398011	0.65825	4.05316	0.81199	0.6791	1.03306	0.85078	1.32328	1.80058	1.58566
1.09239	1.01983	0.8367	0.422487	0.655299	0.982778	0.7901	0.79997	0.58595	0.92389	0.82175	0.84426	1.53393	1.19623	1.601
1.14479	0.77618	0.93055	0.448891	0.484892	0.525521	0.94487	0.97678	0.67681	0.8122	0.73298	0.69848	1.37532	1.38688	1.57716
1.2915	0.73264	0.75935	0.432879	0.646217	0.758401	1.00843	1.03416	0.79471	0.74734	1.38194	0.84965	1.73162	1.56339	1.23934
1.07512	0.94181	0.84517	0.599873	0.631658	0.837308	0.92684	1.17778	0.86275	0.52015	1.05748	0.91106	1.72628	1.68973	1.88847
1.16019	0.97701	0.97059	0.877583	0.528156	0.525012	0.73495	0.725	0.51759	0.5851	0.65331	0.94753	1.08672	1.44449	1.83655
2.5281	0.92835	1.07324	0.54002	0.537501	0.353228	0.96788	0.83538	0.73566	0.79045	0.68606	0.76828	1.3181	1.52155	1.8022
1.24378	0.88708	0.71413	0.665868	0.62488	0.51652	0.99632	0.95837	0.88568	0.80762	0.63544	0.8118	2.02908	2.05826	1.80362
0.93766	0.89312	1.04864	0.633928	0.337064	0.639209	0.66429	0.93658	0.71321	0.76879	0.78302	0.81616	1.47333	1.50208	1.31301
0.90988	1.05275	0.95353	0.558764	0.691717	0.796899	0.80966	0.67445	1.01136	0.7236	0.61619	0.88258	0.63693	1.46459	1.52684
0.93221	0.48009	0.91065	0.688768	0.825764	0.766326	0.60499	1.02309	0.54213	0.58788	0.68962	0.74163	1.79278	1.48088	1.76088
1.28331	0.81986	0.81044	0.609414	0.646038	0.834287	0.65119	1.01834	0.57483	0.83414	0.78332	0.72515	1.63584	1.5879	1.22773
0.77423	0.93428	0.71303	0.623044	0.64846	1.03211	2.22725	1.06307	0.83748	0.52811	0.63269	1.04248	1.47287	1.69073	1.51695
0.9554	0.89862	0.64683	0.672761	0.529994	0.762826	0.8099	1.89442	0.69685	2.04151	0.75656	0.87067	1.88888	1.75071	1.36979
1.11558	1.12352	0.91536	0.936656	0.585546	0.729918	0.88732	1.74217	0.54542	0.74854	0.70472	0.95001	1.72322	1.80154	1.34971
1.05712	1.19425	0.95851	0.476097	0.765096	0.71894	0.5526	0.59756	0.7422	0.98824	0.83088	1.02961	1.83851	1.5683	1.39513
0.83065	2.43945	0.94895	0.527852	0.681651	0.794192	0.93837	0.79271	0.75319	0.75416	0.80566	2.30639	1.72404	1.37742	1.76082
0.9295	1.02227	0.90607	0.636718	0.665668	0.508864	0.63755	0.8723	0.74389	0.81899	1.02024	0.7385	1.59534	1.67642	1.8093
1.00249	0.7942	0.89934	0.347895	4.94279	0.543329	0.83796	0.63207	0.72885	0.69131	0.67811	0.65138	1.3816	1.31244	1.47553
1.38746	1.15336	1.05671	0.761198	0.572716	0.742595	0.68192	0.84435	0.91417	0.48896	0.844	1.38772	1.89842	1.21976	1.8251
0.79895	1.05873	3.76763	0.441185	0.539894	3.10188	0.6847	0.74737	0.85677	0.69851	0.99739	0.73259	1.63552	1.54334	1.36008
1.27484	2.25353	1.07328	1.26757	0.772175	0.652724	0.73221	0.9549	0.75426	1.06854	0.89089	0.87763	1.72947	1.46974	1.43742
1.18926	0.74807	1.82127	0.742863	0.344397	0.656264	0.80517	0.67641	0.64323	0.67424	0.73534	0.86374	1.39865	1.63864	1.1269
1.86793	0.79967	1.00063	0.462523	0.530467	0.978147	0.8361	0.6173	1.2315	0.88195	0.81765	0.87792	1.62975	1.18504	1.63945
0.92781	0.88944	0.98208	0.73267	0.885883	0.858281	0.94009	0.8075	1.4288	0.71111	0.56358	0.87164	1.4874	1.59898	1.34165
1.12625	0.82249	0.96908	0.513314	1.17384	1.17241	0.82204	0.87492	0.63287	0.87768	2.01817	0.84348	1.37661	1.4689	1.69722
1.06299	0.89807	1.33899	0.569828	1.04758	0.758205	0.6453	0.72367	0.82971	0.59143	0.55183	0.60625	0.97738	1.4303	2.08333
0.92792	1.52089	0.8131	0.573135	1.42421	0.520956	0.94019	0.83489	0.72083	1.02712	2.31483	0.64562	1.44712	1.24689	1.41074
1.05109	1.17613	1.27831	1.61902	0.413584	0.736081	0.79548	0.56253	0.71029	0.84592	1.7138	0.76131	1.75865	1.49909	1.11788
0.8445	1.14266	1.02683	0.720415	0.932267	0.780686	0.94043	0.73857	1.42154	0.75669	0.7628	0.72598	1.69352	1.50601	1.6543
1.71929	0.93442	1.09417	0.6252	0.847258	0.744174	0.63391	1.10337	0.87549	0.77779	0.96088	0.90058	1.63824	0.91653	1.6717
1.19953	1.01498	0.81508	0.650334	0.771311	0.956935	0.82262	0.82804	0.62496	0.93189	0.94558	0.82214	1.18276	1.42811	1.35608
1.06038	0.76399	0.84386	0.84577	0.46197	0.557338	1.06545	0.73309	0.48526	1.05713	0.65096	0.71219	1.67619	1.32552	2.15901
1.23604	0.94852	1.78945	0.575799	0.696173	0.744268	0.85784	0.50558	1.04882	1.96522	0.93157	0.76932	1.77466	1.42984	1.02829
1.44966	0.79168	0.94605	0.969583	0.656126	0.886335	0.97657	0.90646	0.80183	0.80733	0.761	1.75698	1.2485	1.43447	1.33489
0.89494	1.08686	0.61033	0.228234	0.838281	0.6322	0.76923	1.28299	0.82419	0.68638	0.87693	0.73168	1.53471	0.97241	1.14416
0.95924	0.70529	1.51355	0.566216	0.59694	0.840094	1.983	0.88684	0.5361	1.12337	1.86259	0.72266	1.13523	1.7366	1.79707
0.65992	0.7769	0.68729	0.719635	0.686479	0.564578	0.92137	1.0787	0.86229	2.2471	0.80471	0.56286	1.37765	1.14096	1.70535
1.19245	1.25009	0.99943	0.502524	0.506085	0.668543	1.62871	0.95616	0.87432	0.69879	2.09014	0.63235	1.90112	1.54982	1.73538
1.15457	0.94616	1.21378	0.587477	0.614728	0.881378	1.757	0.77487	1.15014	0.75524	0.73022	0.80705	1.25838	2.17026	1.7387
1.0469	1.09822	0.86881	0.673133	0.620204	0.682293	0.75304	0.75049	0.81738	0.6593	0.82701	0.82784	1.58348	1.83702	0.34004
1.59077	0.87565	0.82738	1.64731	0.349199	0.636326	0.66258	0.94357	1.14983	0.73392	0.64536	0.69922	1.64814	1.38335	1.46944
1.00931	0.65314	0.85991	0.334912	1.12341	0.778965	0.717	0.72896	1.58247	0.8724	0.66423	1.55971	1.65893	1.18728	1.10732
1.1076	1.83062	0.91953	0.498695	0.77754	0.534591	0.8194	0.98067	0.6118	0.90628	1.27397	0.8089	1.74226	1.28373	1.60433
1.17522	0.84726	1.14296	0.753522	0.587767	0.546963	0.86781	0.95413	0.84358	0.73985	0.83036	0.66858	1.14491	1.48127	1.60304
0.90558	2.37	1.65443	0.695615	0.642558	0.583387	0.64652	0.53599	0.99607	0.57888	1.46246	0.72035	1.44686	1.59861	1.93385
1.11276	1.17259	1.00096	1.04886	0.611636	0.633785	0.73217	0.74219	0.68119	0.91314	0.86714	0.66691	1.73768	1.90142	1.40737
2.04618	1.19273	0.96918	0.820062	1.09492	0.334553	0.93058	1.3762	1.67841	0.65631	0.71161	0.89879	2.19323	1.82295	1.47337
1.00093	0.6741	0.99885	0.693328	0.794833	0.723287	0.80243	0.85639	0.82627	0.87703	1.06703	2.4565	1.59426	1.72909	1.35505
0.75069	1.06645	1.26866	0.603212	0.439139	0.858806	0.93627	2.48109	0.65391	0.83582	0.9998	0.69289	1.34865	1.24639	1.60251
1.06335	1.2378	0.79718	0.648984	0.726089	0.576848	0.61144	0.70205	1.20281	0.68226	0.5159	0.75694	1.42017	2.06199	1.34646
1.81955	0.97419	0.87241	0.613759	0.299459	0.915712	0.8051	0.8812	0.63122	0.59293	0.62607	1.02243	1.77519	1.67532	1.73239
2.05909	1.11443	0.84046	1.20006	0.575487	0.746801	2.04921	0.7596	0.44223	1.00905	0.75465	0.56554	1.53083	1.1987	0.81437
0.77412	0.83321	0.94649	0.491377	0.969897	0.639963	1.31752	0.78318	0.82435	1.26817	1.06236	0.7194	1.63814	1.09885	1.13104
1.10269	0.89865	0.67649	0.512217	0.717851	0.705233	0.72487	0.7484	1.15716	0.80316	0.81503	0.86251	1.8142	1.72578	1.91257
1.12933	0.98532	1.62257	0.581818	0.767584	0.688586	0.78254	0.81134	0.99811	2.20033	0.77082	0.92746	1.46697	1.48507	1.2952
3.18635	0.86177	0.86924	0.57067	1.07755	0.538554	0.82591	0.97545	0.80002	0.50702	0.59273	1.40319	1.14686	1.55551	1.7517
1.28523	2.02437	1.01124	0.512178	0.561103	0.476971	0.83023	0.95358	1.31702	0.95345	0.7831	0.70716	1.61917	1.48422	1.77793
0.97379	0.97958	0.96132	0.642326	0.707047	0.5567	0.96679	0.94053	0.79347	0.73276	0.76763	0.82053	1.72873	1.52331	1.26869
1.24295	0.89027	0.87818	0.658163	0.632154	0.631557	0.82815	0.68724	1.24865	1.15412	0.7964	0.61281	1.38139	1.53254	1.56735
0.77187	1.22275	0.92549	0.562805	0.518101	0.838752	0.9528	0.64926	1.31628	1.55862	0.67352	0.91182	1.96963	1.9747	1.63188
0.97483	1.14703	0.92581	0.821045	0.445414	0.77244	0.83024	0.8325	0.91417	0.77286	0.80349	1.8033	1.74081	1.597	1.83246
0.9905	0.74484	1.06265	0.407298	0.83697	0.793297	0.91432	1.01649	0.72141	0.78383	0.8173	0.66982	1.25864	1.49907	1.91009
1.12952	1.14885	1.73362	0.706758	0.565048	0.952525	0.88754	0.8651	0.95743	1.07174	2.23454	0.70675	1.68979	1.26802	1.71701
0.82891	1.78085	1.49578	0.756485	0.683921	0.489046	0.93649	0.91899	0.79383	0.78197	0.84515	1.0552	1.77965	1.72798	1.88585
1.29649	0.86414	0.93542	0.958416	1.59534	0.83487	0.68136	0.97721	0.82234	0.69775	0.929	0.76087	1.53279	1.69895	1.71545
1.04084	0.70888	1.85263	0.721366	0.529511	0.879411	0.91582	1.06092	0.54107	0.72372	0.60179	1.03592	1.80592	2.06133	1.15093
2.31909	0.94533	0.98329	0.339666	1.01973	0.77102	1.1802	0.74291	1.03723	0.59953	0.91533	0.58521	1.71799	1.67204	1.38036
1.27345	1.02449	0.99084	0.696496	0.797404	0.666705	0.71441	0.70847	0.96314	0.72647	0.94016	1.86493	1.50896	1.70889	1.46748
0.97509	2.44224	0.92949	0.735732	0.563014	0.483853	0.67664	0.96468	1.08536	0.68927	0.65627	4.82354	1.20344	1.43106	1.9338
1.03536	1.19365	1.03527	0.630598	0.816959	0.449349	0.63762	0.84102	1.02372	1.48602	2.0046	0.84366	1.94706	1.71957	1.57988
2.85522	1.16388	0.99391	0.485749	0.764474	0.979042	0.68799	0.93598	0.7457	1.0812	0.67052	0.68004	1.66854	1.47027	2.10808
1.17211	0.88285	1.06555	0.460344	0.394132	0.55508	0.81401	1.04389	0.76125	1.38992	0.74959	0.86687	1.26369	1.77603	0.97303
0.92548	1.25542	0.90806	0.709716	0.56735	0.571819	0.71106	0.69326	0.6654	0.82386	0.7046	1.05076	1.55377	1.61122	1.6532
1.48427	1.19289	1.07023	0.460613	0.880736	0.753656	0.6174	1.01942	1.23752	0.88933	0.84379	0.69957	1.4416	1.67647	1.63146
1.22571	0.79691	0.91801	0.654889	1.37978	0.790768	1.02488	0.83574	0.76842	0.84841	0.80583	0.887	1.71183	1.62312	1.5731
1.06598	1.25397	0.98824	0.631016	0.751704	0.345733	0.74589	0.83913	1.03052	0.64812	0.982	0.54524	1.23188	1.86017	1.51694
1.01862	0.89648	1.04807	0.584414	0.681861	0.871113	0.90798	0.96871	0.52838	0.97669	0.76679	0.87691	1.43672	1.73177	1.67733
1.3859	1.23823	1.55855	0.407939	0.756763	0.621417	0.97726	0.79835	0.61197	0.92333	0.5837	1.64049	1.51775	1.62059	1.57831
0.8863	0.81887	1.04561	0.548322	0.644411	0.501258	0.64392	0.88118	1.34822	0.71069	0.49158	0.94146	1.6247	1.59203	1.52901
0.93578	0.86861	1.08026	0.860069	0.576078	0.779026	0.73231	0.68672	0.74522	0.78372	0.95167	1.92245	2.36884	1.5255	1.70118
0.73974	1.07841	0.83058	0.518375	3.38626	0.847982	0.78645	0.86577	0.96825	0.71878	0.90918	0.87779	1.55338	1.62933	1.35915
0.84485	1.15392	1.43509	0.419221	1.46032	0.556759	0.80013	0.85075	0.73293	0.96151	2.164	0.62576	1.63653	1.32739	1.71198
1.01362	1.02872	1.15918	0.801657	0.276287	3.4644	0.82738	0.70358	0.81137	0.85522	1.42015	0.89708	1.30196	1.61509	2.0287
1.08581	0.79197	1.15687	0.665903	0.520485	0.801536	0.82989	0.60925	0.69967	0.86393	0.83917	0.86126	1.33639	1.54036	1.81994
0.61661	1.16892	0.71122	0.637836	0.531921	0.142555	0.91696	2.48215	0.55288	0.55221	1.11321	0.71888	1.29317	1.53485	1.65557
0.8413	0.89024	1.06864	0.998199	0.575414	0.437228	0.7234	2.43821	0.99239	0.84688	0.64903	1.05198	1.51049	2.15514	1.91161
1.12352	0.83001	1.71935	2.42659	0.556816	0.611872	0.666	0.76723	1.10699	0.6832	0.72658	1.27651	1.50192	1.50145	1.33544
0.84744	0.82615	0.90952	0.586559	0.446812	0.652631	0.76705	1.21039	0.71694	0.54798	0.79114	2.7176	1.89324	1.49028	1.61833
0.9369	4.76614	0.88731	0.633338	0.781696	0.704644	0.59676	0.71747	1.73224	0.30366	0.66827	0.43526	1.71524	1.77961	1.33333
0.89846	0.95099	1.27827	0.553349	0.962414	0.804319	0.90092	0.80126	0.61309	0.41128	0.79373	0.53084	1.61432	1.24796	1.85305
1.08611	1.08905	0.95043	0.797643	0.59639	0.893206	0.69156	0.63761	0.77428	0.78378	0.96528	0.80953	1.51608	1.54402	1.56507
0.94204	0.89256	0.86789	0.691836	0.612751	0.47211	0.90591	0.78905	0.74189	0.78558	0.87954	0.76179	1.91544	1.88159	1.89977
0.89116	1.06168	1.03046	0.511928	0.716244	0.641859	0.99766	0.97035	0.7278	0.8179	0.6464	0.91071	1.51078	1.63623	1.45431
2.51494	0.55907	1.14825	0.371719	1.14212	1.05493	0.74343	0.70424	0.73905	0.47228	0.34982	0.65461	1.97478	1.93866	1.45305
1.048	1.21523	0.68717	0.810891	0.707437	0.464623	0.95779	0.79573	1.10877	2.28654	0.57491	1.02265	1.10546	1.42351	1.95094
1.01429	1.28789	1.02322	0.708659	0.774742	0.645233	0.85777	0.81052	0.99535	0.79736	0.64374	0.67428	1.82181	1.66015	1.55851
1.4166	1.03322	0.99419	1.21913	0.912953	0.817079	0.57554	0.82484	0.8732	0.62568	0.58175	0.68704	1.44891	1.36425	1.58829
1.09044	1.05599	0.98438	0.438369	0.969136	0.500066	0.76503	0.84197	0.79181	0.81363	0.92771	0.85074	1.32897	1.0569	1.43507
0.88594	0.86213	1.00039	1.69204	0.604614	0.796546	0.55485	0.9745	1.21104	0.71764	0.64889	0.81047	1.35796	2.05791	1.22239
0.80971	1.9193	0.8989	0.76546	0.42869	0.944765	0.52728	0.84821	0.81556	0.78875	0.86484	0.79689	2.04203	1.35409	1.31176
0.73003	2.03592	1.00738	0.501674	0.600156	0.815727	0.9179	0.85605	0.5786	0.97409	0.94861	0.76245	1.58788	1.49512	0.892
1.13849	1.73608	0.90085	0.612671	0.746135	0.709859	0.67472	0.99454	0.89293	0.87125	1.69793	0.82915	1.68242	1.72989	1.31919
1.12989	0.90185	1.63519	0.847153	0.594664	3.64537	1.85896	0.79011	0.97729	0.81536	0.74377	2.43018	1.9755	1.72605	1.4031
1.21738	1.29716	1.03206	0.658739	0.606108	0.263585	0.7538	0.59771	1.80276	0.94981	0.84361	0.79987	1.17873	1.50582	1.64004
1.80723	1.2023	1.10891	0.551671	0.648375	1.3282	0.92385	0.85013	0.7757	0.70133	0.87364	0.85678	1.44681	1.79602	1.85314
0.86211	1.0009	0.83041	0.620346	0.810526	0.630755	0.8482	1.03872	0.68277	0.54858	1.42933	0.92755	1.83479	1.66163	1.43536
1.05254	0.69089	0.91294	0.486502	0.660596	0.665505	0.73454	0.90313	1.20458	0.85529	1.3161	0.76976	1.70757	1.72682	1.81753
0.8412	0.90958	1.019	0.621532	0.792524	1.20098	0.71681	0.88501	1.00495	0.69455	0.79932	1.00898	1.47624	1.56679	1.19026
1.02167	1.03396	1.07384	0.516133	0.541058	1.41091	1.26257	0.84289	1.0388	0.71205	2.4887	0.66711	1.44534	1.69897	0.83925
0.9926	1.14497	0.68644	0.731568	0.631772	0.660128	0.78981	0.78109	0.9486	0.94942	0.7718	0.63694	1.76109	1.80613	1.28578
0.91907	0.86765	0.88093	0.487665	0.893918	0.69275	0.92449	0.7787	0.81872	0.84792	1.02483	1.90634	1.80334	1.42652	1.4306
2.30282	1.57954	1.3942	0.66105	0.668209	0.694488	1.13274	0.58325	0.87644	0.76311	0.69866	0.89114	1.73265	1.25974	1.56008
1.12473	1.1189	0.98626	0.961152	1.52873	0.656466	0.82265	0.75966	0.86699	0.72235	0.53303	0.82188	1.74182	1.55201	1.4264
1.11549	1.23117	0.90915	0.665745	0.379091	0.608021	0.8605	0.68007	0.73972	0.85578	1.06775	0.73481	1.79285	1.72215	1.66441
1.30409	0.76297	1.37051	0.605989	0.656069	0.73532	0.59913	2.06867	1.05531	0.97342	1.66069	0.78555	1.24749	1.58417	0.74739
1.03989	1.00755	0.938	0.798887	1.08462	0.21859	0.65735	0.92779	0.71417	0.79454	0.9545	0.70849	1.50499	1.30512	0.45146
0.97543	1.12853	0.66325	0.686398	0.826732	0.61305	1.03956	1.75759	0.91368	0.70931	0.77739	0.8198	1.35389	1.47343	1.67099
0.9127	1.05767	0.79524	0.916656	0.872574	0.463238	0.78285	0.58184	0.76726	0.70177	0.69279	2.67488	1.65122	0.89929	1.84527
1.12882	0.91567	0.75238	0.581484	0.716042	0.797179	0.89031	0.805	2.84675	1.05193	0.8898	0.75397	1.90863	1.50151	1.27418
1.16377	0.95946	0.65696	0.691761	0.63682	0.819676	0.84089	0.89273	1.91246	0.86268	1.03737	0.92386	1.37151	1.66659	1.85194
0.6917	2.13065	1.00611	0.410883	0.883831	0.889224	0.76561	0.7443	0.66592	0.80884	0.89312	2.55953	1.12955	1.27739	1.75273
0.74438	0.93299	0.74315	0.551438	1.19119	0.853772	0.97112	1.40469	0.89226	0.79915	1.11407	0.66421	1.50219	1.59875	1.83754
1.15442	1.05451	0.92365	0.643694	0.594455	0.510489	0.94884	0.67068	0.95611	0.85981	0.67	0.94841	1.36098	1.54144	1.48033
0.91309	2.68017	1.08465	0.757635	1.42239	0.79207	1.7319	0.77492	0.72419	0.62302	0.93009	1.5801	1.23265	2.59778	2.08274
1.29099	2.23784	0.74424	0.559807	0.703956	0.550485	0.83117	1.28923	0.88181	0.67749	0.62155	0.59246	1.66723	1.21711	1.49892
2.70322	1.07274	1.39907	0.652905	0.56019	0.74866	0.96811	0.94233	0.96134	0.74383	0.87898	1.02908	1.29357	1.48002	1.76208
1.13044	0.88015	0.86027	0.525475	0.77036	0.742558	0.42882	0.65138	0.63879	0.77877	0.88101	0.89621	1.67797	1.82542	1.30534
0.94824	0.88312	0.87071	0.55629	0.871965	0.958196	0.55321	0.84927	0.80893	0.81437	0.96908	1.48207	1.5346	2.35452	1.74009
1.33527	1.31033	0.67309	0.625425	0.826006	3.42009	0.85315	0.91539	0.75998	2.43371	0.81701	0.70905	1.45889	1.55749	1.83265
0.83598	1.10889	1.37882	0.587976	0.570558	0.871989	1.41557	0.71722	0.63868	0.78557	0.77646	2.3483	1.55612	1.69324	1.59239
0.74624	0.53647	1.14294	0.868512	0.573088	0.68013	1.09979	0.74983	0.95193	2.01648	0.89039	0.62719	1.66327	1.63747	1.27081
0.99206	0.97732	0.95336	0.63823	0.7457	0.76857	1.14145	0.77622	0.95526	0.56968	1.04703	0.66539	0.80968	1.20558	1.43952
1.04856	0.78113	0.88448	0.877129	0.67493	0.811002	0.99989	0.72509	0.72861	1.22741	1.00965	2.45369	1.16575	1.82114	1.49121
0.78562	0.75793	0.91623	0.516281	0.431255	0.605682	1.07792	0.7449	0.54067	1.13264	0.97917	0.80978	1.80802	1.52924	1.71349
0.89913	1.6207	0.92195	0.722122	0.425829	0.623907	1.07115	0.90159	0.89684	0.93854	0.70131	0.68504	1.53913	1.77008	1.43603
1.00058	1.05679	0.94161	0.584538	0.736359	0.904726	0.83585	0.75515	1.94337	0.61188	0.72727	2.03906	1.74003	1.33063	1.10326
1.33608	0.68762	1.11261	0.593722	0.601797	0.550583	0.83798	0.63067	0.6387	0.56802	0.73505	0.5753	1.55979	1.41208	1.44589
0.86186	1.09405	1.05705	0.715507	0.560991	0.517833	0.66235	1.14493	0.91349	0.76977	1.02972	0.81153	1.40448	1.67426	0.93742
0.79051	0.81974	1.08478	0.623245	0.524403	0.704296	1.14877	0.75681	0.68301	0.67199	0.62242	0.752	1.58163	1.66975	1.43972
1.06099	0.9662	1.93374	0.599268	1.57279	0.486905	0.57355	0.75038	0.44526	0.70465	0.84636	0.90134	1.54704	1.68486	1.64667
1.0074	0.83401	0.79457	0.616623	0.629093	0.848371	1.00102	1.00599	0.30995	2.23799	0.79839	0.82107	1.91309	1.31665	1.45542
2.08769	0.89563	1.20758	0.725173	0.381319	0.655726	0.99072	0.8468	1.09964	0.81737	0.95843	0.81024	1.65168	1.69638	1.50291
1.18893	0.91506	0.66351	0.922495	0.906647	0.649996	0.87056	1.36848	0.86842	2.14206	0.75609	0.8695	1.40458	1.85294	1.97449
1.11246	2.84529	0.81111	0.886325	0.506377	0.385478	0.49827	0.76502	0.55619	0.83035	0.81081	0.74539	1.24723	1.5563	1.43199
1.1818	2.26304	0.97862	0.711708	0.875891	1.62439	0.81844	0.67676	4.60357	2.63094	0.75002	1.1344	1.86744	0.96037	1.738
0.81841	1.5619	1.02322	0.652405	0.3869	0.88945	0.673	0.72375	0.46317	0.59198	2.69548	0.71704	1.61946	1.65435	1.60039
0.74871	2.55691	0.92433	0.515369	0.414554	0.77821	0.79852	0.74337	0.61506	2.43631	0.75016	0.91156	1.90234	1.64907	1.71764
0.94824	0.78326	0.73811	0.717523	0.482077	0.474841	0.7679	0.74772	0.85301	2.08402	0.7286	0.88977	1.81408	1.96967	1.63032
0.95183	0.8824	1.74521	0.392346	0.828348	0.403544	2.04125	0.67582	0.62913	0.69906	0.82413	0.76263	2.37608	1.62812	1.46169
0.67036	1.52576	0.9876	0.556638	0.630141	1.06125	1.01375	0.67755	0.85086	0.85515	1.00645	0.79973	1.81524	1.49264	1.46443
0.7904	1.09338	0.86014	0.592882	0.649049	0.762251	0.79424	0.60839	0.63671	1.36343	0.6441	0.96399	1.42965	1.78254	1.73651
0.65721	1.06518	1.13977	0.531763	0.795787	0.822486	2.05625	0.91749	1.05796	0.77833	0.71202	0.74846	1.36486	1.33413	1.54387
1.02301	1.24608	1.25929	0.734364	0.643169	0.58602	0.84712	0.75829	0.85266	0.6578	0.71933	0.72294	1.69407	0.22564	1.46698
1.09985	0.80953	1.16685	0.616169	0.621912	0.896439	1.58718	0.61656	0.96982	1.99056	1.04748	0.57608	1.17845	1.63838	1.73878
0.90899	2.3733	1.22009	0.584119	0.700633	0.743126	0.66326	0.785	2.22031	0.77887	0.87044	0.64802	1.32729	1.03215	1.17833
1.26573	0.98408	0.90344	0.623544	1.20417	0.933799	1.17949	0.98264	0.6326	2.3738	0.97265	1.26632	1.71788	1.72108	1.62245
1.10352	0.63154	0.80199	0.605185	0.723036	0.874935	0.85651	0.57616	0.939	0.88143	2.02161	0.80921	1.31011	1.66819	1.54074
0.99422	1.12979	0.82808	0.629579	0.840471	0.620331	0.675	0.71739	1.19906	2.20447	0.73115	0.7563	1.70384	2.00178	1.68671
0.97225	0.74775	0.98153	0.652543	0.521334	0.750319	1.03814	0.82282	0.93569	0.72262	0.76924	0.72326	1.71559	1.30957	1.55588
1.05569	0.77973	0.74527	0.220118	0.757228	0.857	0.68078	1.56757	0.76791	0.61854	0.59393	2.21228	1.63094	1.3517	1.71226
1.03452	1.20333	1.06404	0.743031	0.663665	0.309878	0.88123	1.51681	0.74582	0.70754	0.78256	0.67494	1.79202	1.56939	1.71572
1.39989	1.1159	0.84386	0.717113	0.489661	0.735614	0.58039	0.61761	0.80339	0.8542	1.46623	0.67505	1.38243	1.66544	1.73479
1.07215	0.92303	0.96213	0.664844	0.882996	0.929257	0.784	0.58927	0.63137	1.80237	0.76957	0.88379	1.65241	1.08235	1.47542
1.08133	1.01731	0.92949	0.457625	0.283183	0.773449	2.56767	0.99468	1.19041	1.02649	0.67513	0.89182	1.56862	1.13332	1.40454
0.92436	0.70202	0.85417	0.562696	0.712973	0.702037	1.01838	0.45694	1.15401	0.71214	0.53468	0.75572	1.75428	1.73643	1.66696
1.04047	1.19207	1.02438	0.737239	0.466019	1.08339	0.68464	1.62035	0.88617	1.12363	0.79619	0.83094	1.98077	1.21242	1.32524
2.64457	1.79242	0.70754	0.699533	0.60225	0.715138	0.71622	1.68252	1.15723	0.80479	0.98496	0.73988	1.94378	1.65027	1.62047
1.03458	0.9171	0.80346	1.34168	1.79278	0.912672	0.87757	0.72116	0.43251	0.8996	0.71448	0.74106	1.99002	1.47171	1.64535
1.06306	1.12169	1.98044	0.944632	0.807868	0.603699	0.76218	0.86288	0.96083	1.35086	0.79974	0.96257	1.7052	1.1963	1.9183
1.11974	0.89389	0.98307	0.734277	0.76667	0.532465	0.77663	0.66098	0.88539	0.8004	0.85394	2.16653	1.59589	1.60024	1.56829
0.91934	0.93247	1.3495	0.873037	0.651154	0.619366	0.99826	0.5038	0.56441	1.70482	0.76595	0.47742	1.30477	1.12121	1.63054
1.04314	0.78442	1.02721	0.723383	0.895308	0.699241	0.7331	0.77547	0.73046	0.78591	2.50704	1.16609	1.36997	1.58382	1.40729
0.68633	1.08212	0.6014	0.593302	0.964655	3.25926	0.86742	0.91054	0.89618	0.76011	2.35557	1.10957	1.64527	1.39342	1.73695
1.06867	0.93689	1.00621	0.647741	0.745325	0.730883	0.92813	0.89431	1.02583	0.80257	0.56604	0.71245	1.49185	1.14515	3.24877
1.30647	0.83521	0.87449	0.427316	0.496086	0.718086	1.3871	0.33464	1.28947	0.80256	0.67549	0.92919	1.64669	1.76308	1.84521
0.94721	0.87866	1.21522	0.663667	0.856158	0.556846	0.74022	0.80041	0.81178	0.90939	0.77361	1.18783	0.63888	1.74199	1.5004
0.93969	1.00382	0.81054	0.554289	0.676811	0.965896	1.64127	1.84205	0.77094	0.85459	0.78211	0.89357	1.78656	1.59908	1.46417
0.7986	1.03714	0.67856	0.76077	0.669032	1.12072	0.69393	0.97997	1.16119	1.67905	0.73439	0.65456	1.40398	1.19201	1.41689
1.00572	0.90613	0.7459	0.604639	0.645965	0.679507	5.92333	0.55719	0.84487	0.72902	0.61946	0.77834	1.38432	1.60731	1.76147
1.13399	1.21205	0.83712	0.660798	0.663854	0.668179	1.02558	0.6951	0.77737	0.75356	0.82611	0.75952	1.59336	1.4031	1.68073
1.02337	0.73063	1.05915	0.74062	0.511032	0.737978	0.6006	0.97435	0.81032	0.73917	1.12684	0.7721	1.55838	1.71102	1.39004
1.15875	0.76025	0.84931	0.644575	0.535124	0.731859	0.48371	0.89773	0.68852	0.8166	0.66146	1.35838	1.65449	3.47965	1.75248
0.96774	0.59399	1.15712	0.486358	0.572354	0.788388	0.50697	1.42012	0.93048	0.87653	0.86616	0.7983	1.64758	1.37729	1.88959
1.1047	0.99065	1.00397	0.83884	0.613542	0.778201	0.77849	0.80139	0.95768	0.77486	0.83659	0.85883	1.07306	1.80217	1.5017
0.95368	0.89119	0.78663	1.21783	0.602144	0.441497	0.36534	0.71886	1.19157	0.73761	0.52884	1.13408	1.79295	1.7152	1.58154
1.1978	0.86521	1.81823	0.531577	0.891734	0.701903	0.69275	0.95613	0.89505	0.77095	0.83746	0.79498	0.9449	1.67956	1.79561
0.97526	1.03212	1.10752	0.540629	0.503946	0.703356	1.20748	0.75827	0.82342	0.67335	0.74544	0.49427	1.47986	1.79168	1.57132
1.08205	1.03647	1.07268	0.470321	0.347634	0.561445	0.88618	1.1822	0.78118	2.322	0.72006	1.52161	0.99707	1.95199	1.71109
0.98424	2.09344	0.53388	0.604086	0.586874	0.523419	0.92189	0.72125	0.92262	1.34477	2.12982	0.72945	1.85968	1.20896	1.92574
1.16951	0.66912	1.00304	0.627157	0.80982	0.233088	1.56565	0.9624	0.85779	0.68962	0.88672	0.64575	1.53658	1.66635	1.96934
0.7264	1.4063	0.94849	0.78158	0.580171	1.35504	0.80987	0.67139	1.26926	0.64384	1.16048	0.81115	1.14501	1.1311	1.63773
1.11771	0.57539	0.82401	0.577695	0.859081	0.506769	0.93197	0.94029	1.33502	0.72027	0.84523	0.54211	1.53446	3.07939	1.53925
0.7228	1.25803	1.07816	0.513126	0.621924	0.769613	0.59524	0.76666	0.9264	0.69799	0.71495	1.50587	1.51829	1.59053	1.39429
1.06487	0.99649	1.69055	0.787142	0.732544	1.31613	1.08811	1.5697	0.9088	0.68342	0.69359	0.75928	1.62512	1.56274	0.68452
1.12119	2.46732	0.96966	0.776367	0.682528	0.755117	0.70092	0.85081	0.76811	1.70918	0.94543	0.48545	1.83408	1.91362	1.34168
1.33299	0.80528	0.91268	0.475519	0.543232	0.744843	1.12692	0.81742	0.88653	0.73603	1.00334	0.77561	1.74728	1.56789	1.89362
0.99867	1.3007	0.8782	0.388899	0.653906	1.23562	0.62903	0.71966	0.69238	0.86681	0.44553	0.78925	3.26311	1.90962	1.32102
0.77621	0.74325	0.81955	0.690317	0.266591	0.496786	0.82355	1.00401	0.78695	1.45192	0.78091	0.58595	1.14711	1.37443	2.07687
1.03403	0.79136	0.76749	0.849614	0.776095	0.620162	0.7545	0.67743	0.5626	0.87935	0.68225	0.70484	1.35303	1.76529	1.69743
1.24236	0.99409	1.0481	0.796475	0.678867	0.601676	0.84972	1.62409	0.79912	1.19031	0.79601	0.42283	1.07007	1.73618	1.76141
0.91692	1.04582	0.96392	1.14065	0.882702	1.06029	0.69624	0.71887	0.85659	0.85301	2.48985	0.72644	1.56879	1.52022	2.50402
1.1589	0.97456	0.88621	0.631206	0.409746	1.20821	0.83026	0.67073	0.69532	0.7449	1.58112	1.00085	1.9204	1.58141	1.38426
1.66455	2.21827	0.93543	0.542466	0.987437	0.619354	0.70813	0.70876	0.59791	0.72911	0.99986	0.82687	0.93774	1.78744	1.78297
1.34465	1.07414	0.8873	1.43188	0.878013	0.728138	0.85193	0.85538	0.64567	0.79043	0.58821	0.7521	1.23243	1.77321	1.54618
1.13486	1.15871	1.1901	0.460929	0.89133	0.602825	0.88055	0.76095	0.85264	0.59849	1.01127	0.72095	1.71108	1.49218	1.56868
1.09492	1.07697	0.86006	0.549928	0.45315	0.540801	0.68971	0.65904	1.02236	0.97987	0.83665	1.15976	1.4115	1.4541	1.45893
0.91576	0.93408	0.93099	0.767405	3.31235	0.643933	0.91759	0.8351	0.98403	2.16189	0.8234	0.53903	1.34822	1.36085	1.66674
1.08867	0.95458	0.81402	0.682987	0.598003	0.66353	0.52637	0.91242	0.76497	0.51578	0.97754	0.65268	1.60748	1.20428	1.14181
1.13922	1.143	1.06556	0.618293	0.559818	0.752659	0.65611	0.97471	0.5166	0.79323	0.94193	0.82222	1.49177	1.59274	1.59808
1.23655	0.88355	1.06767	0.47665	0.800611	0.709855	1.09762	0.51791	0.83015	0.84473	0.74252	0.93511	1.44251	1.45939	1.7735
0.94582	1.01583	1.02485	2.70364	0.628682	0.865944	0.98551	1.11285	0.69889	0.69484	1.03305	0.78136	1.43749	1.37212	1.45206
1.2323	1.07681	0.84711	0.765182	0.463255	0.513328	0.75453	0.90246	0.84812	1.4703	1.06146	0.92237	1.69205	1.76318	1.07193
1.25414	1.09984	0.94246	0.557579	0.796691	0.554122	0.74005	0.90177	0.61492	0.68795	0.71024	0.68861	1.87303	1.47166	1.73283
1.27458	1.77939	0.93271	0.716993	0.781509	0.829121	0.7158	0.66144	0.92615	0.85429	0.85125	0.79857	1.54998	1.07143	1.58684
1.05725	2.08997	0.69535	0.453795	0.692323	0.578383	0.67041	0.6746	0.80125	0.71384	0.73376	0.82766	1.93748	1.36249	1.51464
1.19934	0.94377	1.04126	0.351236	0.540303	0.500523	0.69868	0.60833	0.95034	0.80241	0.86285	0.67245	1.74624	1.56939	1.65213
1.06295	0.9113	1.13055	0.792003	0.664947	0.606864	0.90971	0.75612	0.71474	1.06059	0.73482	0.90792	1.24599	1.4224	1.52268
0.9542	0.94362	1.38737	0.727005	0.83257	0.503498	0.90605	2.23475	0.86523	0.76401	0.61002	0.69787	1.17362	2.06399	1.31671
1.05678	2.36739	1.40551	0.720264	0.557581	0.539189	0.57152	0.59377	0.72902	0.7608	0.66826	0.70184	1.27207	1.70577	1.56397
1.1056	0.85954	1.07263	0.467126	1.11371	0.782328	0.88048	1.15116	0.8147	0.81575	2.05377	1.77179	1.60351	1.59596	2.02979
1.04594	2.36986	1.07092	0.65622	0.648983	0.644328	1.32466	0.5997	0.65983	0.95059	0.91687	0.86944	1.35233	1.61127	1.86281
1.84081	1.21277	0.99083	0.711229	0.52688	0.570353	0.77313	1.50766	0.86599	0.76818	0.99815	0.94425	1.87987	1.7569	1.27808
1.03675	1.03015	1.06037	0.93438	0.923828	0.397993	0.96065	0.89922	0.79849	0.67861	0.88984	1.43431	1.74856	1.23646	1.83109
1.04069	1.25423	1.06199	0.50072	0.561063	0.693237	0.97058	0.98719	0.87072	0.53497	0.81574	0.87307	1.41954	1.89748	1.64062
0.95657	0.93249	0.82062	0.607802	0.758338	0.76416	0.67772	0.8138	0.78534	0.77482	0.81378	0.71639	1.64106	1.706	1.54319
0.80073	0.97083	0.35463	0.722594	0.648316	0.681686	0.76361	0.65645	0.72134	0.76312	0.83222	0.73952	1.74045	1.42415	1.60726
0.95617	1.13636	0.67932	0.680295	0.417525	0.834987	1.40125	1.03481	0.84131	2.48422	0.70541	0.70276	1.48775	1.33424	2.21811
1.28211	1.03099	0.9647	0.85797	1.27221	0.787853	0.5989	1.02046	1.09864	0.92369	0.80088	0.78165	1.59675	1.60795	1.57506
1.1628	1.13787	0.87189	0.536896	0.445726	0.727897	1.44705	1.00548	1.32006	1.21891	0.75724	0.86223	1.83519	1.4422	1.18224
2.41841	1.10703	0.88701	0.852297	0.876302	1.30886	0.85658	0.72808	0.88462	0.63306	1.09374	1.85153	1.04116	1.70242	2.06364
0.91007	2.59775	1.10418	0.582341	0.847654	0.591817	0.50174	0.84597	0.59804	0.67588	0.85481	0.82955	1.5023	2.13249	1.70397
0.81946	2.16027	0.86373	0.491509	0.79502	0.926094	0.43913	1.12862	0.66661	0.67435	0.81628	0.9406	1.8508	1.58754	1.94965
1.20538	1.27794	0.89397	0.464436	0.688489	0.791906	0.84361	0.87573	1.06481	0.85582	0.63061	0.67262	1.30116	1.52365	1.59711
1.18725	1.08445	1.30119	0.533117	0.512103	0.581167	0.77789	0.81414	0.82226	0.75756	0.83777	0.51538	1.73665	1.32197	1.29785
0.87319	0.82945	0.90561	0.537903	0.406348	0.717161	1.52813	0.59984	0.68539	0.70673	0.82687	0.79286	1.76853	1.68559	1.65533
1.21013	1.99136	0.78666	0.538079	0.585101	0.431849	0.77309	1.04104	1.07204	0.85454	0.78148	0.9356	1.75314	1.69583	1.38755
2.04543	0.846	1.20838	0.62039	0.675047	0.505625	0.69019	0.9916	0.95106	0.8481	0.55371	0.7151	1.47139	0.80427	1.58076
2.10586	1.14893	0.83617	0.487179	0.833446	0.749583	0.84951	0.64897	0.58358	0.73783	0.93943	0.7274	1.35292	1.52247	1.56891
0.70287	1.11903	0.68779	1.34847	1.45771	0.676968	0.87444	1.01171	0.88568	0.72929	0.93548	0.52346	1.4558	1.59751	1.60779
1.45447	1.08821	0.83158	0.563369	0.825224	0.472537	0.70221	1.07747	0.79956	0.88868	0.70383	0.8143	1.48447	1.5563	1.69191
1.12158	0.67998	0.94618	0.74748	0.858767	0.622698	0.60759	0.91177	0.94903	0.59861	0.81499	0.78464	1.74607	1.69831	1.1756
0.98987	0.84515	1.59879	0.351718	0.908011	0.826641	0.77775	1.77201	0.53899	1.56851	0.61106	1.03593	1.70458	1.61966	1.88346
1.44908	0.82108	1.16694	0.509916	0.871571	0.779185	0.67599	0.9529	0.87006	0.57452	0.60851	1.73989	1.81691	1.76777	1.98657
1.05468	1.25684	1.01457	0.768222	0.691239	0.748986	0.79022	0.9293	1.76731	0.76723	0.80186	0.77934	1.52108	1.35969	1.6224
0.74773	0.67329	0.69081	0.778646	0.783842	0.81775	0.75259	0.71029	0.78272	1.44233	0.95081	0.74966	1.74541	1.55281	1.6098
1.32736	0.87939	0.86358	0.719534	0.937582	0.449796	1.006	1.09955	1.7499	0.77253	0.50282	0.85408	1.75839	1.82501	3.506
0.98246	1.05546	0.90901	0.498276	0.728118	0.793423	0.75014	0.69621	0.81342	0.65518	0.92664	0.7989	1.21708	1.39508	1.69804
0.95997	1.07356	1.07726	0.578775	0.387455	0.850457	0.82387	0.99786	0.92528	1.13213	0.64016	0.71335	2.03251	1.40478	1.29873
1.19954	0.73955	0.8893	0.644016	3.94237	0.794142	0.55901	0.42982	0.64322	0.79078	0.75361	0.98982	1.7847	1.64822	1.70735
1.00844	1.67467	1.13681	0.525125	0.802012	1.0609	0.7558	0.73995	0.83335	0.7794	0.81486	0.7831	1.59422	1.34074	1.73453
1.08207	0.68397	0.91652	0.941041	0.728935	0.747902	1.05796	0.7729	0.67138	0.70835	0.84075	0.87868	1.79471	1.7106	1.73863
1.19302	0.71901	1.21888	0.344052	0.460214	0.744607	0.92262	1.01962	0.91919	0.55737	0.82751	1.07681	1.65333	1.75657	1.60023
1.25849	0.88988	0.97396	0.804154	0.723277	0.404781	0.5902	1.80557	0.97545	0.93703	0.52498	0.75393	0.94113	1.59341	2.14536
0.99002	0.92469	0.92885	0.460222	0.786781	0.815137	0.93641	0.76703	1.21955	0.67553	0.77998	0.89211	1.64338	3.09079	1.48656
2.02701	0.7956	0.81899	0.771151	0.756624	0.834424	0.7579	0.51931	0.84787	0.81766	0.48475	0.90317	1.79155	1.90035	1.61622
1.02616	1.13133	0.68047	0.902948	0.708614	0.789387	0.80207	0.77297	0.43724	0.83967	0.90147	0.69179	1.63007	1.51957	1.26528
0.99046	0.66873	1.02378	0.616621	0.673611	1.03105	0.79915	0.61445	0.91373	0.6117	1.67456	1.51989	1.42162	1.07303	1.75188
1.1093	0.89714	1.8658	0.872569	0.675868	0.848368	0.69497	0.64697	0.80768	0.73225	0.93402	0.70541	1.63877	1.91344	1.32758
1.08741	1.4327	0.9111	0.749979	0.538774	1.14315	0.82534	0.63569	0.77065	0.67053	2.00571	0.86312	1.73947	1.62556	1.39212
1.02561	0.88977	1.21448	0.427364	1.11586	0.84217	1.75167	0.79628	1.51249	0.63298	1.80266	0.76232	1.04673	1.6697	1.8673
0.91547	0.76245	1.34531	0.777704	1.5283	1.27096	0.90964	0.79267	0.8744	1.25663	0.66613	0.86019	1.70022	1.35375	1.30045
0.81338	1.05278	1.08037	1.13597	0.711146	0.663912	0.74957	1.49039	0.92017	0.7342	0.61821	0.71186	1.19329	1.29995	1.68709
2.46145	1.18205	0.62213	0.675511	0.74838	0.572199	0.5879	0.70171	0.43703	0.73162	0.79915	0.63227	1.14051	1.8308	1.08969
1.14524	1.15542	1.1039	0.824606	0.701283	0.727197	0.82606	0.50364	0.66267	1.42991	0.88943	0.59502	1.70354	1.57752	1.72232
1.0905	0.85522	0.90881	0.313921	0.948128	0.651716	0.85958	1.82179	0.69994	0.95752	0.71615	0.74727	1.33454	1.61251	1.82469
0.69949	0.55814	0.64511	0.610245	0.713747	0.434215	0.93949	0.77205	0.92367	0.69968	0.85239	0.8535	1.58977	1.51198	1.75396
0.98876	1.07034	1.32908	0.391645	0.47076	0.243669	0.88122	0.73272	1.0634	0.89026	0.86457	1.44373	1.36855	1.78889	1.65284
0.61444	3.92477	1.03	0.654661	0.704324	0.895495	0.73965	1.66563	0.63305	0.60447	1.09941	0.73262	1.62858	1.63952	1.38661
0.94155	0.57469	0.71442	0.582477	0.695792	0.431264	0.78873	1.72936	0.7024	0.82655	0.88932	0.69603	1.2197	0.88103	1.64973
1.14583	1.02801	1.6382	0.627414	0.798597	0.776414	0.83858	0.89742	0.97451	0.51288	0.84726	0.92306	1.76866	1.576	3.46684
0.8047	1.04184	0.99494	0.763941	0.56276	0.688861	1.34045	1.21778	0.88282	0.8722	0.66105	0.79803	1.5745	1.49538	1.91427
1.01917	1.03464	0.99689	0.602359	1.42845	1.09987	0.78933	0.79837	0.88672	0.85778	1.02138	0.66837	0.84561	1.13244	1.96386
1.07953	1.56102	0.83834	0.600819	0.520131	0.712584	0.67716	0.87472	1.48095	0.56711	0.70056	0.81013	1.58702	1.74715	1.01896
0.98527	1.0121	1.45696	0.650834	0.521777	0.923775	0.65993	0.65054	0.76983	0.8644	0.74126	0.44701	1.67227	1.48472	1.538
1.14168	0.81672	1.032	0.356308	0.465075	0.621782	0.70265	0.59561	0.43752	0.80106	1.03372	0.74845	1.59482	1.2841	1.20566
1.12595	1.93095	1.65262	0.497821	0.76625	0.757841	0.98444	0.8357	0.87877	0.80195	0.71926	0.81656	1.4597	1.59413	1.18427
2.20173	1.01361	0.92222	0.615219	0.438675	0.688099	1.09648	0.88271	0.88414	0.86299	1.00186	0.7562	1.70172	1.5932	1.5414
0.80134	1.35647	1.43997	0.715089	0.861671	1.05573	0.79794	0.73378	0.77882	0.80854	0.93437	1.01081	1.60743	1.57097	1.50719
1.01488	0.70509	0.87296	0.575262	4.02569	0.697397	0.87248	0.92489	0.79052	0.90712	0.83781	2.07639	1.45464	1.65764	1.29525
1.0681	0.84339	0.58515	0.493818	0.697222	0.889883	0.74211	0.96942	0.82051	0.75143	0.62944	0.85168	1.86284	1.15564	1.73805
0.8317	1.16745	1.19793	0.839691	0.612834	0.678581	0.90628	0.78364	0.8999	1.00723	0.83591	1.52653	1.16932	1.76018	1.70852
0.81014	0.89292	0.86606	0.548335	0.935739	0.673807	0.33792	0.85035	0.92069	0.50696	0.69012	0.59982	1.11356	1.43673	1.47995
3.31161	0.88793	0.95837	0.756576	0.114176	0.395685	0.80666	0.71785	0.7966	0.6773	0.8845	1.62056	1.56255	1.63412	1.08796
1.57815	1.2113	0.75183	0.513413	0.904755	0.758889	0.58228	0.94355	0.58834	2.0301	0.79618	0.77201	1.52413	0.98332	1.59618
1.25888	0.87379	0.89834	0.408237	0.911261	0.822041	0.86795	0.81514	1.16956	0.80589	0.68748	0.75144	1.30156	1.76644	1.635
0.97495	0.95494	0.94373	0.497031	1.29391	0.789781	0.92922	0.92008	0.7485	0.97584	0.77918	0.84197	1.76449	1.99344	1.50564
0.84312	0.57521	0.82001	0.457998	0.982387	0.834628	0.66959	0.71275	0.79636	0.81508	0.85011	0.75332	1.49906	1.78074	1.54246
0.83008	0.85896	1.66121	0.686962	0.421651	0.639313	0.90863	0.73493	0.93654	0.57654	0.84312	0.46015	1.6394	1.61186	1.28522
1.16573	0.73113	0.71696	0.73766	0.717981	0.470288	0.79545	0.82948	0.86816	0.83033	0.91402	0.75042	0.82315	1.53261	1.58132
1.21255	1.08939	1.00317	0.78084	0.397374	0.428514	0.67453	0.81259	1.92193	0.55557	0.79988	0.72163	1.46702	1.47871	1.46941
1.09934	0.94981	0.95697	0.81359	0.510079	0.611109	1.04938	0.90169	0.68681	0.75763	0.9859	0.82472	1.99534	1.31961	1.62969
0.85002	1.00646	0.90735	0.840224	0.910829	1.57848	0.83019	0.8632	0.64535	1.13258	1.84233	1.6917	1.40054	1.81088	1.8118
0.9246	1.23755	1.10107	0.696576	0.737302	0.811365	0.65833	0.67073	1.05146	0.84958	2.21866	0.76355	5.68966	1.81869	1.59678
0.87046	0.67103	1.03329	0.532252	0.60519	0.515293	0.5633	0.97203	0.82146	0.84843	0.51328	0.92713	1.38538	1.86911	1.60353
0.76307	0.5923	1.92634	0.853429	0.731303	0.628457	0.83237	0.76918	0.66917	0.66415	2.24497	0.78452	1.44343	1.60886	1.51762
2.01532	2.02975	0.83874	0.575618	0.398024	0.652949	0.66102	0.60206	0.76805	0.75755	0.84429	0.69397	1.84357	1.69951	2.00622
1.18608	1.00248	0.97019	0.522277	0.723653	0.432081	0.47493	0.9075	1.20662	1.12327	2.11004	0.85772	1.78283	1.46921	1.65866
0.94563	1.27748	0.99564	1.55051	0.797878	0.425706	0.69394	0.97881	0.80557	0.77857	0.83486	0.7985	1.47814	1.32869	1.68084
1.73704	0.74019	0.83899	0.489159	0.451278	0.704076	0.8355	1.68266	0.92082	1.12735	0.74565	0.80104	1.94268	1.74172	1.67418
0.87465	1.19858	0.85547	0.598995	1.2257	0.635375	0.95415	0.78694	0.77879	0.68962	1.94302	0.78558	1.61142	1.37511	1.95531
1.02074	0.91328	1.06848	0.517574	0.377721	0.497105	0.78547	0.70927	0.73649	0.79352	1.1309	0.56333	1.57703	1.91332	1.58686
1.18178	1.05569	0.6057	0.755146	0.640736	0.533707	0.77647	0.88419	0.82139	0.78636	1.94803	0.95155	1.27067	1.47955	1.53958
1.15278	0.94535	0.70731	0.689443	0.619218	0.412263	1.18746	0.94195	1.39891	0.8074	0.73326	0.59014	1.43571	1.7882	1.63668
1.02894	0.57766	0.783	0.554246	0.678623	1.07497	0.8483	0.83728	0.90618	0.86899	2.20119	2.02102	1.88035	1.47171	1.7329
1.06973	1.03681	0.97798	0.735597	0.678221	0.610734	0.75118	0.80431	0.84545	1.04174	0.57037	0.78325	0.88668	1.89647	1.67462
0.85728	1.18196	0.83119	0.969267	0.55478	0.752933	1.10078	0.91655	0.84257	0.71843	0.54251	0.80772	1.37792	1.54265	1.78611
0.95551	0.86714	1.02065	0.604152	0.999183	0.437421	1.09135	0.93894	0.95039	0.92962	0.79704	0.88398	1.57452	1.67884	1.98064
1.20122	0.96176	1.34786	0.586533	0.748325	0.750243	0.85863	0.64909	0.82404	0.66107	0.67306	1.03099	0.73592	1.67262	1.29743
2.40632	0.9657	0.9631	0.63851	0.514305	0.871958	1.42171	1.81426	0.71967	0.73934	0.89583	0.82274	1.29378	1.88085	1.43785
0.70561	0.93675	0.66799	0.787044	0.856092	0.688054	0.915	1.01119	0.78937	0.82661	0.85012	0.86712	1.44285	1.79292	1.41276
1.04249	0.92074	0.82079	0.784058	0.57532	0.709154	0.8282	1.41048	1.13656	0.85182	0.65568	0.93696	1.59751	1.72243	1.42968
0.89487	1.02001	0.47399	0.570955	0.584491	0.369873	0.89462	0.63606	0.89714	0.65113	0.73589	0.79979	1.18785	1.40312	1.859
1.21085	1.04562	1.37665	0.36078	0.774191	0.448705	0.89033	0.69544	1.32835	1.19776	0.83572	0.77322	2.36419	1.61057	1.87857
1.02807	0.96714	0.72314	0.752244	0.641233	0.754772	0.58482	0.76499	0.78687	0.85388	0.68174	2.36557	1.52933	3.52834	1.40011
0.91058	1.01022	0.93834	0.562453	0.68104	0.952651	0.56581	3.80722	0.68747	0.86189	0.8057	0.6089	0.98183	1.78493	1.45479
2.19538	2.04182	0.89492	0.476118	0.417948	0.371513	0.86891	0.74558	0.73682	0.68152	0.72674	0.77562	1.8303	1.34728	1.20661
1.9196	1.05794	1.05472	0.631897	0.694933	0.766201	0.95266	0.68141	0.78377	0.50886	0.82872	0.92435	1.0057	1.8774	1.14482
0.97793	1.29108	0.72366	0.811971	0.726623	0.607799	0.57019	0.80702	0.91913	0.7946	0.34936	0.62922	1.31853	1.63862	1.82885
0.95505	1.10765	1.15256	0.398373	0.546877	1.36921	0.86319	0.51983	0.75425	0.8031	0.80173	0.70267	1.7992	1.66543	1.75599
0.93014	2.23692	0.79759	0.743244	1.5006	0.695041	1.05124	1.04292	0.87665	0.72977	1.22446	0.48983	1.18517	1.78076	2.09055
1.15889	0.98637	0.81889	0.721043	1.02818	0.61521	1.80308	0.64419	1.0219	0.78318	1.27668	0.84849	0.87009	1.83939	1.85544
1.10215	0.94387	1.19407	0.666085	0.546693	0.909777	1.0306	0.69629	0.98707	0.98501	1.81233	0.93692	1.84876	1.35304	1.59034
0.74859	1.2521	0.42817	0.621719	0.619882	0.730996	0.57122	0.78533	0.67551	0.78302	0.83094	1.76485	1.53449	1.48195	1.55708
0.9865	0.8314	0.98966	0.66959	0.917998	0.55497	0.62967	1.05914	0.69501	1.32486	0.91964	0.8045	1.64238	2.00003	1.81995
1.03456	0.68372	0.95728	0.661253	0.271341	0.625422	0.89219	0.79077	1.28105	0.68922	0.78488	0.80232	0.9829	1.60973	1.42397
1.0439	0.92859	1.13694	0.660938	0.615958	0.797167	0.72482	0.87675	0.84991	0.9062	0.73626	0.53735	1.77329	1.50616	1.78139
1.10788	1.17878	0.82781	0.802752	0.580132	0.710416	0.92311	0.69974	1.05868	0.57445	2.45179	0.97176	1.94354	1.41028	1.59053
0.99604	1.5647	0.84895	0.493441	1.67307	0.694285	0.7602	1.61759	0.69541	0.90554	0.81376	1.21491	1.12182	1.35661	1.91482
1.80439	0.9965	1.07753	0.630443	0.52489	0.75071	0.91594	0.86668	0.62501	0.84005	2.30775	0.63921	1.07549	1.72105	1.82072
2.13276	1.4467	0.95073	0.824346	0.672606	0.770723	0.71369	0.8432	0.84136	0.60725	0.79005	1.89258	1.56453	1.13174	1.19506
0.97991	1.20194	0.94938	0.806562	0.714198	0.568055	0.6965	0.62786	1.01388	0.78103	0.78294	0.85512	1.1804	1.56299	1.88326
0.9249	1.15387	0.76858	0.598923	0.67594	0.770815	1.25366	1.85884	0.93113	0.56081	0.93438	0.67825	1.66186	1.58273	1.44337
1.13914	1.02481	0.88937	0.604099	0.621981	0.544354	0.88197	0.99578	0.93003	0.57692	0.80805	0.71014	1.92502	2.71031	1.7954
1.703	0.61118	0.86868	0.712064	1.4456	0.759906	0.83799	0.99863	1.4889	0.77961	0.66038	0.87356	1.41488	1.90761	1.44621
0.95807	1.96545	0.97346	0.342501	0.511348	0.491429	1.94031	0.70845	1.76419	0.97055	0.76582	0.6914	1.67357	1.86924	1.33061
0.68976	1.0353	1.08471	0.60689	0.982796	0.87062	0.53994	1.01383	0.80827	0.59329	0.89769	1.00007	1.69056	1.79641	1.44644
1.09444	1.16357	1.28801	0.932443	0.694651	0.700592	0.8079	0.72318	0.85952	1.18382	0.68153	0.86943	1.63372	1.29401	1.63291
0.85353	0.7939	1.78939	0.635366	1.71552	0.521887	7.42294	0.82561	0.99696	1.04604	0.6071	0.77341	1.62479	1.53323	2.03331
0.68336	1.21755	0.89642	0.556801	0.510501	0.565525	0.82758	0.85679	0.86249	0.77203	0.62989	0.68507	1.77154	1.56077	1.52617
1.26708	0.80162	0.9759	0.662023	0.697016	0.568437	0.67856	0.76254	0.78067	1.00434	1.0703	0.96398	1.70901	1.68701	1.63701
0.99564	1.00589	1.02981	0.549475	0.922386	0.637307	0.79473	0.69761	0.84399	0.60562	0.74457	0.83942	1.60115	1.55919	1.91223
1.00945	1.12702	0.96104	0.407945	0.666621	0.852539	1.15787	0.69063	0.92164	0.85381	0.88061	1.00398	0.93033	1.80047	1.37305
1.20963	1.73216	1.13688	0.782464	1.04383	0.659231	0.74143	0.90356	0.93922	0.9149	0.59907	0.97264	1.60195	1.39759	1.35581
0.98477	1.03128	1.12222	0.596064	0.673324	0.812596	1.3514	0.84227	0.88823	0.67382	0.76568	0.66614	1.77178	1.6501	1.32085
1.15234	1.1051	0.98539	0.889322	0.83713	0.866497	0.70288	0.81684	0.83789	2.1377	0.81258	0.91193	2.10505	1.97135	1.49181
0.97874	1.26694	1.75374	0.790973	0.475663	0.762779	0.50106	0.60324	0.85601	0.63782	0.7329	1.08527	1.43766	1.72469	1.07657
0.98611	0.94156	0.79309	0.757886	0.901405	0.498437	0.93689	0.86059	0.75651	0.939	0.71552	0.71877	1.10912	1.48694	1.08899
1.5859	0.76023	1.11747	0.873854	0.812388	0.477925	1.09475	0.96914	0.57089	0.81859	0.65685	0.58956	1.724	1.56829	1.64686
0.82619	1.12246	5.66067	0.617972	0.584797	0.776372	0.71053	0.80906	0.98315	0.68536	0.71695	0.94275	1.20669	1.46777	2.313
0.86748	1.00135	0.88358	0.625377	0.654349	0.58049	0.90623	0.69326	0.70643	2.50815	0.69857	0.56106	1.46778	1.53562	1.95137
1.02622	2.56575	0.90889	0.664486	1.13447	0.641088	0.42659	1.2893	0.96481	0.84211	0.89277	0.99802	1.27385	1.80481	1.96044
1.21478	0.88424	0.88138	0.727022	0.766823	0.368162	0.88262	0.93033	1.19929	0.89769	0.83301	1.91539	1.69895	1.35087	1.57824
0.86078	0.7897	0.93549	0.568577	0.362169	0.870044	1.37019	0.85135	1.12738	0.72727	0.72652	0.66157	1.5203	1.62078	1.23498
1.25773	1.04612	1.04742	0.67989	0.534929	0.403626	0.91016	0.84725	0.93135	0.71681	1.01485	0.77916	2.17964	1.52601	1.74635
1.22216	0.79767	0.89576	0.947177	1.50044	0.695134	0.98385	0.96848	0.83253	0.60053	0.68837	0.73674	1.4644	1.45813	1.71405
1.19695	1.37611	0.99855	0.770655	1.79129	1.02618	0.85315	0.84441	1.04019	2.36173	0.95058	0.83743	1.33074	1.08157	1.25858
1.00405	0.95556	1.03241	0.63406	1.79673	0.740919	0.99696	0.96448	0.69677	0.77776	0.81935	1.01002	1.40248	1.61287	1.50063
1.7041	0.74454	0.89679	0.660984	0.80999	0.615121	0.97556	0.97804	0.82281	0.7337	0.7892	0.90444	1.90739	2.93187	2.0678
1.05636	0.86343	0.88288	0.629488	1.16208	0.638905	0.77691	0.86356	0.7616	1.4984	1.88497	0.84737	1.57772	1.34725	0.86059
1.31543	1.00921	0.83679	0.759402	0.429049	0.949778	0.90907	0.96466	1.08326	0.64226	0.76627	0.86642	1.22051	1.62582	1.95299
1.0644	0.86124	0.7356	0.281386	0.514746	0.796307	0.86796	0.60489	0.88231	0.54867	0.67531	1.99345	1.61935	1.75012	1.38738
0.7605	0.89341	0.78454	0.536164	0.540256	0.408212	1.39454	0.89524	0.96207	0.85228	0.81949	0.59752	0.8745	1.59515	1.70623
0.95559	1.06021	0.72756	0.173917	0.535665	0.738956	1.33534	0.74297	0.8069	0.89456	0.63992	0.59795	1.6765	1.3838	1.01964
1.02574	0.85261	0.85773	0.398174	0.546986	0.560084	1.81758	0.93742	0.7098	2.52216	0.9359	0.81967	1.56324	1.52292	1.76155
0.97685	0.78733	1.13278	0.77847	0.621174	0.689604	0.86177	0.86245	0.74931	0.93593	1.14673	0.9468	2.03214	1.55921	1.60827
0.90522	0.84345	1.00229	0.65701	0.398152	0.767827	0.69889	0.90486	0.95503	2.03407	0.70484	0.82785	1.30643	1.17302	1.49852
1.21388	0.84515	0.95241	0.429787	0.252789	0.644615	0.66385	0.81261	0.62388	0.84605	0.77089	0.72097	1.66423	1.81871	0.98885
1.1845	1.14157	0.97847	0.676508	0.5489	0.856995	0.90401	0.93749	1.06767	0.58948	0.81727	0.85542	1.59039	1.56118	1.52699
1.14009	0.67563	0.74122	0.614574	1.49298	0.654511	0.57151	0.98455	0.83728	0.96849	0.93674	0.67755	1.63426	1.09944	1.28298
1.11225	1.03058	1.12559	0.678818	0.8001	0.928719	0.87096	0.92525	1.09942	0.73239	1.11383	0.70949	1.43318	1.10671	1.24625
1.05764	1.08325	0.83958	0.740952	0.708833	0.986014	0.86832	0.49589	0.81462	1.78801	1.33567	0.77009	1.76543	1.35689	1.54241
0.78112	0.96482	0.88095	0.432853	1.2609	0.748465	0.80903	0.73652	0.99902	0.73594	0.68977	0.83837	1.73098	1.58343	1.53892
1.59651	1.01606	0.82861	0.74121	0.739409	0.752628	0.75476	0.8879	0.79397	0.59981	0.61614	0.94353	1.73847	1.86066	1.62699
2.45919	0.74912	0.96832	1.23315		0.535846	0.65572	0.894	1.08374	0.77578	0.58304	0.92539	1.75072	1.66166	1.06723
3.96504	0.9389	1.22545	0.71978		0.689947	0.81026	0.82137	0.43405	0.77873	0.93509	1.57712	1.43835	1.43428	1.67941
2.32319	2.40208	1.02252	0.551117		0.822385	0.75395	1.0513	0.99261	0.71654	0.964	0.71839	1.65549	1.76722	1.09068
0.87894	1.12462	1.7155	0.65154		0.850593	0.78893	0.63811	0.86087	0.94663	0.68833	0.99086	1.71884	1.74709	1.6239
1.0701	0.87758	2.32419	0.799717		0.666269	0.7932	0.82371	1.36952	0.6539	0.74041	0.91471	1.4988	1.13546	1.81651
1.18667	1.03929	0.93525	0.654952		0.803022	0.96901	0.74706	0.86537	1.31454	0.85472	0.70089	1.85312	1.46335	1.58213
1.27161	0.85283	0.87897	0.354581		0.599364	0.80708	0.66721	1.0443	0.81325	0.62528	0.94526	1.92564	1.4719	1.46355
0.83169	2.02787	0.95893	0.408824		0.783435	0.76648	0.48626	0.65209	1.11853	0.42671	0.94077	1.51145	1.7233	1.56481
0.89747	0.71893	0.91692	0.643574		0.498551	0.93552	1.14912	0.71378	2.39874	0.61259	0.67795	1.73068	1.19086	1.52445
0.88677	1.5194	1.02296	0.817216		0.667401	0.61551	0.5174	1.27244	0.59233	0.95382	0.66721	0.88044	1.39497	1.50149
0.97727	1.18852	1.47424	0.996568		0.508348	0.60262	1.23216	0.6905	0.49839	0.84866	1.43605	1.07446	1.13326	1.71867
1.07907	1.32755	0.78564	0.812141		0.714133	0.78871	0.68343	0.86813	0.83113	1.2983	0.75917	1.69831	1.47179	1.65062
0.80989	1.20944	1.51056	0.617518		0.578798	0.86448	0.79493	0.71495	0.56559	0.70332	1.00764	1.46522	1.25856	1.64841
1.16667	1.20113	0.78283	0.800087		0.659739	1.05943	2.24091	0.26696	1.86842	0.79765	0.83002	1.48303	1.73333	1.97077
1.09725	0.7849	0.70698	0.770195		0.63766	0.71273	0.62608	0.90256	0.92316	0.86827	0.87518	1.50742	0.94477	1.54061
0.7592	1.1251	1.01084	0.356358		0.839949	0.73812	1.3315	1.24763	0.66566	0.9277	0.86397	1.42277	1.76513	1.45021
0.88053	0.89215	0.83327	0.659991		0.805092	0.70724	0.75943	0.73863	0.98842	0.55977	0.85038	1.55229	1.42093	1.76363
1.16231	0.94873	1.50773	0.841276		0.355918	0.56891	0.79377	0.87298	0.72644	0.91885	1.6992	1.15011	1.77082	1.5403
0.87251	0.9926	0.75238	0.50734		0.92282	1.07029	0.58619	0.85454	0.67995	0.72902	0.82024	1.70771	1.61833	1.54628
0.96091	1.12552	0.85956	0.789303		0.637802	0.66444	0.78746	0.89842	0.98312	0.79686	0.89514	1.50619	1.75768	1.74551
0.93182	0.69811	1.08606	0.423027		0.903536	0.91071	0.90581	0.83417	0.7606	0.73657	0.70165	2.44398	1.19924	0.94975
1.03292	0.95203	0.86697	0.498329		0.744483	1.42483	1.09048	0.81511	0.97702	2.65637	0.62646	1.63411	1.47499	0.94619
1.10223	1.02769	0.97332	0.530182		0.189503	0.97518	0.69552	0.59005	0.65496	1.18038	2.31988	1.37042	1.45552	1.46239
0.74776	0.63094	0.87564	0.496214		0.445746	0.90296	0.6926	0.68268	0.84837	0.8312	0.88051	1.58477	1.56055	1.30146
1.27161	1.64938	1.08302	0.705277		0.838894	0.90299	0.71117	0.64222	0.67267	0.88208	0.76253	1.62923	1.73855	1.66617
0.84164	0.7205	0.92202	0.637671		0.696404	0.92313	0.88101	0.92295	1.44966	0.79475	0.88327	1.73366	1.80924	1.54497
0.92342	2.63396	0.95563	0.587183		0.447527	0.7418	0.86126	0.56306	0.93364	0.74781	1.20734	1.14335	1.58574	1.08881
2.40715	1.04583	0.84926	0.596049		0.781463	0.70254	0.66246	1.12822	1.73139	1.06595	0.75653	1.48629	1.93238	1.31597
0.88358	1.08661	1.47008	0.835242		0.738844	0.86359	0.64996	1.37736	0.66067	1.03351	0.78559	1.51224	1.66803	1.68687
0.98554	0.82045	0.88185	0.672509		0.885238	0.71559	1.96609	1.20063	0.88435	1.06906	0.77296	1.36965	0.84963	1.65693
1.09664	0.79313	0.76094	0.561239		1.14297	0.9176	0.89384	0.92363	0.95479	0.83408	0.98409	1.74086	1.94513	1.84508
1.55693	1.02976	1.1654	0.532724		0.298338	0.47068	0.88933	0.46698	0.8021	0.86061	0.83011	1.85651	1.90149	1.34363
1.73448	0.9466	0.93557	0.445391		0.701618	0.7847	0.77129	0.83179	0.93964	0.51168	1.15569	1.70919	1.2852	1.78009
1.50621	0.95369	1.00282	0.643831		0.763768	1.18128	0.92942	0.89277	0.77481	1.65737	0.67138	1.43065	2.16355	1.70064
0.73557	1.46137	1.19267	0.406778		0.63625	0.71671	0.69271	0.68832	0.71847	0.82916	0.66138	1.7106	1.88747	1.7563
0.6677	0.93642	0.80233	0.588829		0.52756	0.89825	0.86574	0.87705	0.81333	0.78395	0.48454	1.36094	1.62077	1.28112
0.87537	0.76896	0.93535	0.603784		0.644754	0.98441	0.70499	0.82858	0.79991	0.75858	1.06034	1.22123	1.67751	1.72167
1.23985	1.0062	3.88533	0.876428		0.665822	0.45763	0.74469	0.81711	0.89494	0.87386	0.68785	1.5225	1.31885	1.50484
0.61992	1.16542	1.80578	0.662672		0.699833	0.82544	0.74643	0.59899	1.54475	0.84956	0.81653	1.44935	1.42131	1.62268
1.25125	0.85898	0.92	0.347533		0.69399	0.52527	0.92607	0.90041	1.87641	1.9682	0.88286	1.20371	1.91254	1.66138
1.63247	0.91298	1.02671	0.689693		0.999164	0.8363	1.5458	0.86589	0.51381	0.77045	0.76408	1.17411	1.50328	1.67525
0.70169	0.7467	1.03206	0.671932		1.16026	0.83926	0.83163	1.07472	1.11029	0.84873	0.93642	1.6044	1.67223	1.68705
1.57642	0.68252	0.93188	0.386997		0.849534	0.94825	0.48435	1.14499	2.0211	0.86733	1.98224	1.65941	1.27077	1.85522
0.69972	0.98417	0.89791	0.683405		0.574011	0.40463	0.57124	4.35894	0.86978	0.81364	0.66485	1.54351	2.349	1.5848
1.61015	1.13547	1.4124	0.724289		0.887981	0.79311	1.0423	1.86735	1.33612	2.11812	0.93821	1.73029	1.78669	1.71985
1.14565	0.91725	0.97442	0.683595		0.873513	0.76854	0.64715	1.01855	0.69585	0.78902	0.77176	1.7499	1.75879	1.89898
0.7992	0.91828	0.79349	0.249406		0.431176	0.90829	0.88274	0.58001	0.77007	0.53575	0.78066	1.58362	1.3679	1.45551
2.10443	0.76974	0.92006	0.776542		0.650595	0.58815	1.06847	0.69107	0.85722	1.16871	0.73493	1.20627	1.71678	0.27803
0.94106	0.89415	0.86061	0.629647		0.63127	1.0489	0.84648	0.62528	0.79581	0.60498	0.6996	1.53123	1.88233	1.65294
1.35886	2.00576	0.72363	1.10962		0.767096	0.64789	0.69493	0.68634	0.57244	0.8018	1.00262	1.65048	1.7885	1.4883
1.19881	0.9995	0.73614	0.456082		0.858747	0.85148	0.85467	1.03959	0.86614	1.37353	0.85191	1.42313	1.39407	1.59785
2.39547	0.85521	0.96517	0.528065		0.742981	0.58854	0.69925	0.89438	0.75715	0.94945	0.8055	1.79839	1.57899	1.56854
0.9514	1.21228	1.2359	0.653537		0.757994	0.44545	0.40526	0.91591	0.91697	0.48991	0.86507	1.67924	2.01486	1.19107
1.08248	0.88669	0.86693	0.588299		0.861977	0.91209	0.98687	1.15907	0.46132	1.89303	0.67234	1.87527	1.64376	1.39989
1.04402	1.22223	0.77996	0.789172		1.2234	0.77957	0.71646	0.25423	0.85186	0.78763	0.72801	1.80309	1.55628	1.53728
0.94287	1.003	0.76556	0.618056		0.582998	0.6118	1.52427	0.62163	0.73165	2.50174	0.64212	1.25889	1.7736	1.47268
1.08708	1.10728	0.77596	0.775596		0.912086	0.89935	1.34695	0.67168	0.73814	0.93196	0.89597	1.51431	1.56205	1.75343
1.15551	0.81072	0.83482	0.403946		0.663343	0.4689	1.41176	0.7054	0.93557	1.16212	1.93298	1.56242	1.27613	1.64336
1.2704	1.44431	0.86231	0.614234		0.790971	1.02757	0.72988	0.86899	0.86328	0.80506	1.60259	0.2519	1.81711	1.4625
1.88571	2.09787	1.08277	0.122504		0.532119	0.75993	0.81831	0.52879	0.59258	0.52841	1.70736	1.46336	1.28819	1.72574
1.07682	1.06909	1.08348	0.491872		0.632231	0.81545	0.79651	0.81511	0.5305	0.7364	0.78334	1.38549	1.9343	0.9218
1.0629	0.88641	0.8856	0.803196		0.573811	0.79965	0.89171	0.66007	0.78453	0.87061	0.94847	1.29479	1.29035	1.54678
1.04084	1.12638	0.76521	0.786649		0.929112	0.96538	0.88405	0.73619	1.87879	0.87143	0.60956	1.97168	1.51765	1.57929
0.81648	0.89999	1.05997	0.514854		0.843864	1.06062	1.14818	1.04294	0.68943	0.59804	0.90177	1.82112	2.29336	1.37947
1.01575	2.54545	1.62385	0.621642		0.637333	1.91008	0.75752	0.54662	0.66664	0.85151	0.84285	1.37121	1.68417	0.10022
0.7222	0.74027	0.68968	0.712595		0.646752	0.78415	0.75989	0.62967	0.7983	1.04224	0.56228	1.7191	1.13842	1.8347
0.88904	1.12278	1.18863	0.718658		0.489964	1.47692	1.57574	0.83527	0.83557	0.9063	1.28471	1.78479	1.53701	1.51478
1.25253	0.97588	0.97681	1.47077		0.93485	0.81239	0.73192	0.57623	0.64708	0.84228	1.51709	1.55674	1.38058	1.62098
0.70147	1.00149	1.14308	0.603216		0.569614	0.66941	0.71726	0.76496	0.97198	0.88235	0.78303	1.60944	1.2873	1.60234
0.99162	0.89571	1.04176	0.504161		0.902902	1.13509	0.54799	0.83273	0.76028	0.87889	1.35461	1.65559	1.70813	1.57397
0.73637	2.37359	1.79038	1.06893		0.761177	0.94272	0.78269	1.02316	0.51965	0.6304	0.86609	1.43543	1.98421	1.54784
0.90139	0.79678	0.92262	0.710385		0.470702	0.76609	1.05106	0.80262	1.02515	0.77352	2.53521	1.38524	1.63063	1.71881
1.42106	0.90879	0.92083	0.624526		0.665621	0.81819	0.86601	0.5211	0.66401	0.81299	0.64569	1.76186	1.63907	1.66959
1.31739	1.01533	0.74237	0.384495		0.803746	0.82224	0.93377	0.87259	0.75304	0.99731	0.71425	1.71387	1.78454	1.49229
1.1246	0.80098	1.83322	0.665422		0.720929	0.71181	1.26589	0.83447	3.10567	0.84211	0.87038	1.76259	1.79575	2.75577
0.79848	0.81717	0.94271	0.50251		0.601617	0.77138	0.7939	0.63293	0.72615	0.83539	0.93691	1.51367	1.65356	1.44056
0.65576	0.83379	0.88889	0.427782		0.351642	1.10133	0.72384	0.88637	0.75682	0.70248	0.64173	1.13035	1.73169	1.6929
1.44763	0.54218	1.12685	1.1358		0.776442	0.43378	0.77373	0.83992	0.9636	0.9955	0.83592	1.74897	1.50463	1.49667
0.62921	1.22163	0.96484	0.940644		0.45767	0.8132	0.78482	0.52601	0.70994	0.7918	0.82845	1.09338	1.04199	1.61332
1.27739	0.78075	0.69651	0.53983		0.526263	0.62921	0.7884	0.88601	0.72828	0.61581	0.74405	1.3912	1.10129	0.58884
0.76814	1.10871	0.81623	0.733399		0.765218	0.77305	0.69635	0.78711	0.75078	0.97358	0.78932	1.77522	1.42176	1.40776
0.98904	0.90845	0.83345	0.477262		0.776646	0.51993	0.89003	0.87807	0.84037	0.83975	0.57741	1.54007	1.52278	1.45953
0.94376	0.93188	1.60314	0.578715		0.815805	2.30518	0.9194	0.79828	1.00178	0.66138	0.73458	1.26349	1.34263	1.6553
1.04292	0.91749	1.63117	0.733437		0.596815	0.86367	0.89618	0.55176	0.81388	0.78264	0.66141	1.84087	2.45076	1.38271
1.91083	1.18407	0.99326	0.532781		0.61212	0.75533	0.90036	0.94335	0.79728	0.70441	0.57122	1.23029	1.48932	1.57639
0.86558	0.80285	0.95905	0.532203		0.838086	0.8776	0.64059	1.05277	0.7342	1.33083	0.78638	1.71628	1.26826	1.72216
1.06515	0.75498	0.97401	0.81006		0.922316	0.93892	0.82746	0.74564	0.7608	0.53997	0.91795	1.5278	1.48081	1.71859
1.09794	1.65911	0.93005	0.506475		0.495714	0.91995	0.67317	0.89056	2.34232	1.70708	0.66885	1.83681	1.46519	1.88393
0.61159	0.97545	0.85494	0.896694		0.64495	0.84242	0.94223	0.88548	1.94494	0.53896	1.80012	1.23388	1.49043	0.70289
1.18431	0.87935	1.85932	0.708611		0.696008	0.91124	0.83299	0.67771	0.76959	0.92996	0.37076	1.42688	1.44887	1.73249
0.80241	0.90731	0.85951	0.840497		0.513805	0.54859	0.72183	0.83788	0.73891	0.72698	1.24557	1.59494	1.55393	1.29114
0.95784	0.78955	0.62113	0.449088		0.449045	0.8594	0.75438	1.03306	2.25106	0.98739	0.74954	1.42934	2.08073	1.84335
1.06831	1.00519	0.81403	0.614328		0.677809	1.63602	0.74939	0.73325	0.81036	0.81575	0.6882	1.504	1.08905	1.6443
1.33645	0.86802	0.56847	0.634177		0.90906	0.93999	0.97469	0.84787	0.8346	0.74612	0.75812	1.65043	1.46318	1.42022
0.83824	0.78715	0.86231	0.512034		0.746958	2.69175	0.54189	0.77413	0.7763	0.72446	0.52648	1.76902	1.86881	0.80476
0.86529	2.7593	0.9715	0.800758		0.797986	0.86407	1.61337	1.08546	0.89491	0.72831	0.73861	2.06061	1.77672	1.73059
1.03041	0.96483	0.99069	0.773665		0.68724	0.71474	0.90019	1.01335	0.84938	0.56232	0.74309	1.26427	1.46688	1.74694
1.0179	0.95626	0.77575	0.701679		0.808673	0.91658	0.89207	0.82046	0.85897	0.8107	0.54372	1.06575	1.50291	1.87406
2.3243	1.28156	0.83029	1.0769		0.627713	1.59965	0.80884	0.85337	0.83241	0.7336	0.46054	1.6369	1.2904	1.55969
1.21342	0.79774	0.88258	0.492769		0.799951	0.74187	0.65558	0.71804	0.54329	0.52493	0.9047	1.00886	1.36045	1.78524
1.07108	1.09614	0.81382	0.720496		0.668175	1.29905	1.1824	0.82283	0.55346	0.85597	0.67849	1.53174	1.88005	1.64006
1.09415	0.71102	1.10619	0.652712		0.743287	0.65289	0.98994	1.2633	0.71698	0.93408	0.78156	1.7868	1.60275	1.75748
0.99354	1.62291	1.09809	0.516277		0.567701	0.93959	0.57027	0.84763	0.66827	0.54421	0.6173	1.35339	1.34886	1.09257
0.80611	0.91143	1.10304	0.94395		0.600186	0.99905	1.75886	0.79071	0.58737	1.11467	0.72516	1.64073	1.18932	1.48097
0.92124	0.77636	0.95473	0.716256		1.00964	0.51712	0.9863	0.66903	0.92874	0.91788	0.94687	1.54987	1.32483	1.47998
1.02358	0.97845	0.85309	0.737941		0.343164	1.74972	0.71721	1.37373	0.66428	0.86667	0.78117	1.51371	1.41553	1.59859
1.11334	1.08063	0.78962	0.562077		0.635268	0.76484	0.88449	1.32504	0.73971	0.78041	0.63594	1.87611	1.59553	1.73935
0.91099	1.05958	0.87057	0.5682		0.847313	0.72345	1.16959	0.84485	0.82089	0.66592	0.74539	0.94997	1.62839	1.92907
1.14454	1.04505	1.03813	0.570757		0.936629	0.80995	0.70627	0.96945	0.78121	0.6666	0.84713	1.64353	1.3694	1.9105
1.00463	0.88592	0.9514	0.27284		0.613844	1.12824	1.1916	0.92442	0.64673	0.80675	0.77178	1.44765	1.0773	1.60041
0.88314	0.82645	1.05221	0.583138		0.556567	1.02549	0.78305	0.80912	0.52333	0.65318	2.10239	1.49615	1.82536	1.66686
2.38849	0.99754	1.32498	0.594073		0.497505	0.97865	1.67884	0.80906	0.85662	0.89162	0.85908	1.38107	1.96354	1.67008
0.99555	1.99958	0.95031	0.510186		0.900459	0.76894	0.78328	1.14792	1.48114	0.5441	0.81615	1.63224	1.31417	0.97451
0.89422	1.4426	1.54669	0.430848		0.682586	0.81234	0.9014	0.70683	0.81243	2.57225	1.21361	1.51091	1.45691	1.77806
0.70489	1.07179	0.9555	0.612237		0.734933	0.8861	0.95748	0.79305	0.63322	1.06719	0.83045	1.65803	1.6193	1.8582
1.9209	1.08202	1.16291	0.606931		0.731145	0.59287	0.9044	0.84079	0.68467	1.03244	0.84688	1.97114	1.03195	1.62005
0.99935	0.72834	0.83625	1.25499		0.874263	0.89743	0.68486	0.90755	0.70149	0.94001	0.66966	1.58979	1.83887	1.04074
1.08574	0.8016	1.11786	0.374593		0.585282	1.00058	0.74823	0.83219	0.90376	0.74989	1.84188	1.6812	1.73837	1.55945
0.80019	1.03698	1.18882	0.807998		0.595337	0.84461	0.77557	1.11332	0.50237	0.74141	0.73143	1.47558	1.93808	1.48986
1.38521	0.73483	0.90599	0.551848		0.798132	1.45356	0.64251	1.126	0.83073	1.64895	1.89796	1.45547	1.52256	1.83117
0.75635	1.21082	1.78123	0.616799		0.782991	0.76588	0.85326	0.74054	0.70852	2.08298	0.4981	1.54342	1.48853	1.54816
1.03062	1.04589	1.00421	0.688329		0.865306	0.76096	0.75265	0.65022	0.71802	0.88998	0.73845	1.53435	1.51158	1.86058
4.01441	0.91208	0.90852	0.521394		0.554147	0.62447	0.92592	1.02754	0.82807	0.91155	0.79511	1.58819	1.30248	1.2251
0.92332	0.5376	1.74064	0.673586		0.631035	0.69141	1.21758	0.90773	0.86532	0.83023	0.62625	1.87842	1.60714	1.34078
1.01864	1.0159	0.75062	0.484905		0.684509	0.6234	1.1779	0.75812	0.73156	2.11338	0.90127	1.84914	1.26084	0.94933
0.89898	1.1104	1.0137	0.554357		0.516414	0.61754	0.79569	0.75336	0.68875	0.88635	0.71315	1.4123	1.22175	1.62863
1.06766	3.00811	1.26642	0.836251		0.457835	1.03381	0.69149	0.7539	0.79545	0.8426	0.76694	1.28067	1.76876	1.81347
1.33837	0.71531	0.81177	0.488328		0.682947	0.7731	0.96546	0.6531	0.52425	1.86304	1.32627	1.02014	1.91072	1.12361
1.25176	1.12536	0.95902	0.52691		0.74273	0.84783	1.32273	0.38951	0.71017	2.07918	0.80391	0.36344	1.80121	1.61406
1.09336	1.09309	0.92159	0.357351		0.746028	0.69642	0.89804	0.88815	0.8311	0.80287	1.93836	1.08542	1.78791	1.45774
1.08281	0.58737	0.95793	0.745073		0.737142	0.92412	0.72986	0.97611	0.66269	0.79375	0.63009	1.08099	1.29822	1.61865
0.65152	0.79865	0.99075	0.618781		0.853569	0.9548	1.00852	0.9558	0.62556	0.70436	0.72218	1.50668	1.67037	1.39231
0.96413	0.99228	0.6885	0.592875		0.710691	0.75804	0.96005	0.58749	0.79556	0.75501	1.0289	1.75572	1.57564	1.24645
0.95948	0.83635	0.99666	0.591102		0.675194	0.69528	0.7676	0.80666	0.83023	1.03426	0.58544	1.32709	1.62622	2.0812
1.30283	0.86798	1.06213	0.681183		2.19961	0.83869	0.64851	0.89551	0.79898	0.94438	0.83308	1.71772	1.57015	1.38023
1.09992	1.83502	1.13078	0.791895		0.584478	0.64311	1.37275	0.72611	0.72182	0.76168	0.91548	1.27227	1.83631	1.17095
1.36411	0.96136	0.83097	1.32874		0.837939	0.75123	0.83885	0.38553	1.4114	0.93445	0.85809	1.24244	1.39484	1.75995
1.19021	1.2573	0.74725	0.499522		0.520195	0.50147	0.61239	1.83243	0.54245	0.93183	0.92713	1.40514	1.71606	1.86808
0.94963	1.23495	0.98664	0.74332		0.670459	0.52302	0.74875	0.46214	0.6381	0.63477	0.35408	1.70025	1.68141	1.7405
1.27646	0.86197	0.88073	0.63807		0.61853	0.91702	0.7848	0.69693	1.262	1.00007	0.70914	0.34434	1.44378	0.96787
1.07168	0.83389	1.07343	1.14255		0.891817	0.8937	0.95355	0.82372	0.51352	0.68573	0.75619	1.1185	1.4792	1.70219
0.91256	1.06783	0.92782	0.643012		0.87534	0.71071	0.9396	0.76825	0.53839	0.75728	1.76734	1.11389	1.21667	1.76859
1.10401	0.98582	0.75674	0.579217		0.458178	0.67658	0.76303	0.60766	0.74028	0.76491	0.75587	1.62906	1.60679	1.63132
1.42708	0.74927	0.84988	0.751988		0.780485	0.79358	1.9454	0.7	0.98595	0.96543	0.88389	1.967	1.34986	1.40014
0.94606	2.17437	1.2967	0.587457		0.667575	0.95857	2.75691	0.73706	0.87814	0.69981	0.6315	1.76193	1.3407	1.53161
0.84105	0.95003	1.01337	0.665799		0.497718	0.96195	0.63378	0.69901	2.13898	0.66949	0.65065	1.46469	1.3783	1.55787
1.71924	1.04439	0.8943	0.688316		0.947664	0.71112	0.62463	0.65825	0.75535	0.56349	0.62842	1.51886	1.60669	1.49679
1.80496	1.50332	1.15686	0.619778		0.928576	0.97141	0.71417	0.74123	0.75011	0.7806	0.9026	1.81666	1.81488	1.42711
0.88002	1.01282	1.48247	0.286757		0.671337	0.7604	0.89318	0.81572	0.73237	0.82492	0.86064	1.74594	1.41161	1.07652
1.07306	0.91228	1.09195	0.760193		0.542261	0.6411	1.68218	0.97213	0.61326	0.91753	0.66661	1.27785	1.84784	1.35842
0.65984	1.06432	0.88638	0.320786		0.383471	1.12829	1.06084	0.83648	0.87135	0.62055	0.76965	1.59018	1.44299	1.20351
0.88041	1.00456	0.85643	0.715837		0.872244	0.88617	0.75872	0.91143	0.7345	0.75368	1.12192	1.671	1.9384	1.85515
1.11141	1.16427	0.69906	0.829925		0.289271	0.74918	1.16486	0.62299	0.81148	0.86519	0.82514	1.82421	1.46009	1.36546
1.16331	1.20613	1.05974	0.651001		0.572761	0.66953	1.51549	0.73588	0.8595	0.72111	0.43878	1.59283	1.76532	1.66247
0.97089	0.97962	1.40972	0.597912		0.58912	0.44924	0.77535	0.85752	0.77282	0.78847	0.37013	1.90606	1.14278	1.37955
0.77816	1.77766	1.12988	0.725474		0.388614	0.69793	0.80221	0.88089	0.87386	0.72236	0.76765	0.92122	0.9942	1.73455
1.26907	1.06779	0.91055	0.400063		0.732696	0.97397	0.67391	0.98561	1.93202	0.57482	0.9895	1.50144	1.82908	1.23256
0.90525	1.71188	0.99317	0.777692		0.524378	0.34739	0.80128	0.64451	0.54389	2.68382	0.72248	1.24626	1.64814	1.80341
0.7348	0.91854	1.03927	0.579713		0.766298	0.91598	1.39881	0.76588	0.91581	0.61714	0.67724	1.22502	1.8046	1.62527
1.0074	1.26025	1.03599	0.74722		1.75526	0.81362	0.68353	0.79088	0.78602	0.69022	0.66006	0.97777	1.72787	1.88377
0.88975	1.12932	1.00848	1.07487		1.0117	1.54965	0.87558	1.0537	0.78276	0.60148	0.78971	1.48519	1.84628	1.51438
2.04042	0.8888	0.82674	0.538616		0.788828	0.9116	0.38191	0.67118	0.64926	0.89232	0.83028	1.81666	1.18291	1.81056
1.23666	2.57552	0.99247	0.383313		0.411279	0.89023	1.35463	0.40897	0.65902	0.6184	0.95316	1.41462	1.48571	1.51849
0.69308	1.01457	0.75475	0.612607		1.14102	0.78384	0.80125	1.08099	0.47119	0.75423	0.80714	1.48769	1.53111	1.32575
0.88917	0.93281	0.81267	0.471046		0.678281	1.06346	0.94682	1.12301	2.30234	0.93587	0.89786	1.25178	1.54403	1.5598
1.23633	1.41531	1.27656	0.65594		0.603818	0.77456	0.72053	0.96811	1.91175	0.86471	0.73279	1.81983	1.72247	1.55603
1.11634	1.11782	0.87518	0.626917		0.821243	0.88141	3.19825	0.86709	0.75606	0.81568	0.93349	1.66863	1.8621	1.56829
1.20113	1.10819	1.07549	0.25233		0.53347	0.58236	0.84365	0.77357	0.60552	1.03239	0.7734	0.84708	1.33135	1.73381
0.99194	0.98975	0.94174	0.641226		0.561709	0.85765	0.99428	0.87299	1.048	0.53478	0.81562	1.61754	2.17839	1.83993
1.0979	0.83287	0.88538	1.69342		0.792191	0.68635	0.60181	0.79361	0.71917	1.09968	0.79272	1.32264	1.35471	1.34586
1.06082	1.16019	0.64937	0.763381		0.710003	1.11018	0.78519	0.80163	0.89946	0.57831	0.80542	1.74012	1.72469	1.30166
0.69078	1.04696	1.10154	0.489345		0.668528	0.44485	0.82749	0.86715	0.73314	0.62459	0.95845	1.27749	1.49888	1.34823
1.10835	1.05458	0.99491	0.650444		0.8387	0.78219	0.58422	1.10066	0.80243	1.07256	0.83837	1.19001	2.00531	1.42003
0.75802	0.88791	0.73414	1.17564		0.98588	0.79739	1.06103	0.76244	1.49898	0.98584	0.65061	1.15388	1.49586	1.69691
0.94324	0.81655	0.90051	0.616296		0.73382	0.92169	1.46303	0.77075	0.80699	1.2261	0.61908	1.76492	1.55429	1.65589
1.07137	2.06366	1.11315	0.629313		2.23434	0.71706	0.86578	1.02881	0.786	0.59615	1.14899	1.06296	1.40907	2.05577
1.00537	1.925	1.58232	0.698497		0.760266	0.71058	1.0565	0.78441	0.69348	2.48044	0.85212	1.07137	1.57659	1.82813
0.98827	1.07098	0.79492	0.630239		0.821065	0.63908	0.8484	0.87778	0.65104	0.68421	0.78393	1.71502	1.36645	1.91561
0.72068	1.00992	1.00869	0.716299		0.477706	1.15093	0.72761	1.33438	0.75544	0.59699	0.80646	1.54215	1.28135	1.68129
0.95321	1.08187	1.08081	0.754159		0.662138	0.78587	1.07517	0.69009	0.65613	0.62643	1.03635	1.51539	1.16395	1.60277
0.90446	0.94409	0.81677	0.949829		0.514697	0.74087	1.14699	0.83281	0.60309	0.89274	0.88858	1.25964	1.8636	1.45582
1.50086	1.01119	1.1307	1.53047		0.673379	0.919	0.90695	0.89648	0.58019	0.82092	0.52751	1.07454	1.79349	1.49988
1.66062	0.98724	0.90718	0.507378		0.79879	0.77275	0.71436	1.37152	0.78389	0.87433	0.75539	1.38808	1.59417	1.63552
1.03128	2.05822	0.81207	0.117669		0.624167	0.79968	0.73809	0.78654	0.80669	0.90456	0.88516	1.59665	1.46078	1.47344
0.85888	1.17294	1.53789	0.517332		0.909772	0.80613	0.9928	0.83298	0.91379	0.91329	0.98779	1.69113	1.69704	1.43669
0.90764	0.80949	1.02454	0.606473		0.723551	0.8615	0.78458	0.892	0.68532	0.44619	0.78625	0.95291	1.64591	1.58404
2.65847	0.63607	0.82551	0.820664		0.776642	0.63348	0.78939	0.59911	0.63579	0.70518	0.8542	0.98337	0.38591	1.20189
1.17874	0.53662	1.01505	0.591662		0.681945	0.53578	0.81655	1.16763	0.71183	0.6122	0.75166	1.46483	1.58142	1.66026
1.18931	1.00142	0.96805	0.663512		0.646558	0.75655	1.14727	0.54458	0.40442	1.67444	1.90779	1.60763	1.5394	1.73946
1.1146	1.06259	0.78118	0.528705		0.5763	0.79024	0.68672	0.27711	0.75179	0.86307	0.72573	1.52461	1.57171	1.70346
1.28959	0.99321	1.15095	0.681313		0.676712	0.77465	0.70766	0.5337	2.07264	0.80197	0.73931	1.83461	1.76614	1.44642
0.84252	0.99743	1.03346	0.758211		0.646071	0.68385	0.74899	0.74883	2.04184	0.80756	1.01049	1.7006	1.53788	1.71213
1.08727	1.43369	0.95348	0.738623		0.754975	0.55309	0.73025	0.84331	0.69879	0.6998	0.94313	1.71935	1.7774	0.84502
1.06603	1.15675	0.82431	0.835416		0.724427	0.77081	0.98939	0.55327	0.77905	1.07807	0.88856	1.55112	2.12915	0.85332
1.10718	1.11232	1.01844	0.385395		0.909319	0.94068	0.75949	0.76274	0.82242	0.96535	0.58448	1.72783	1.58218	1.78367
1.01911	0.84563	0.58831	0.518268		0.747349	0.67253	0.61529	1.12502	0.93512	1.17879	0.71303	1.7209	1.41201	1.69645
1.22937	0.88032	1.09791	1.04567		0.757498	1.54875	0.94195	1.16663	0.76588	2.34897	0.77068	1.43018	1.65694	1.01403
1.24341	0.92029	0.68701	0.391023		0.772347	0.62253	0.83808	0.81369	0.53774	0.79876	0.86394	1.6323	1.70049	1.68362
1.02449	0.95187	1.03872	0.698605		0.854629	0.86431	0.85515	0.58193	0.9076	0.63145	1.66259	1.52938	1.65337	1.76619
1.5272	1.06365	0.79096	0.437954		0.684024	0.7281	0.67059	1.03835	0.70076	0.97947	0.75335	1.33729	1.81515	1.86323
1.26	1.01987	0.95003	0.995419		0.863814	1.33724	0.70645	1.00123	0.69139	0.93477	2.247	1.56431	1.83361	1.54421
1.10776	0.89942	0.67662	0.584989		0.525137	0.94254	1.18187	0.86762	0.89299	1.04157	1.36582	1.38132	1.43059	1.55318
0.99235	0.54236	0.87578	1.38653		0.6601	0.64879	0.50989	0.88486	0.65973	0.73747	0.75357	1.46802	1.73151	1.57281
0.81865	1.04527	1.06531	0.377748		0.780691	1.74915	1.64262	0.99564	0.76216	0.91134	0.86465	1.54794	1.27796	1.46069
1.12875	1.02031	1.22019	0.545411		0.454778	0.44469	1.00836	0.84493	0.74781	0.82425	0.46304	1.48626	1.43818	1.42799
1.11434	1.25682	0.99311	0.564497		0.679285	0.74424	0.97685	0.83009	0.6288	0.88029	0.71262	0.85068	1.20112	1.65894
1.76182	1.04586	1.10492	1.20146		0.851958	1.06973	0.64907	0.97298	0.5786	0.78757	0.62656	1.35511	1.53006	1.38908
1.12212	0.99832	1.06363	0.885405		0.585681	0.8051	0.88339	0.7682	0.73857	0.85912	1.81775	1.72873	1.65995	1.4232
1.04132	1.12515	0.93492	0.555773		0.451591	0.84799	0.63812	0.87087	0.63374	0.90583	2.1717	1.502	1.71176	0.87072
0.98416	1.15974	0.95084	0.573758		0.768563	0.90308	0.55902	0.71548	1.16719	1.00784	0.5435	1.08177	1.45983	1.82175
1.05293	1.14018	1.27027	0.472667		0.593248	0.85762	1.32421	1.37831	0.74745	0.85215	0.82645	1.71606	1.74723	1.03375
1.09361	0.91059	0.8469	0.58443		0.615734	0.64042	0.56248	0.79284	0.80105	0.83236	0.92481	0.84542	1.9588	1.32665
0.93723	0.92591	0.94888	0.573863		0.648501	0.79771	0.79034	0.84746	0.98298	0.78698	0.78243	1.51712	1.86787	1.68688
1.0026	0.98963	0.92058	0.211266		0.548162	0.76343	1.0697	0.36386	0.89844	0.80409	0.89313	1.42559	1.74376	0.73652
0.94198	1.3309	0.89672	0.515985		0.382512	0.89697	0.74446	1.08901	0.7134	0.66018	0.79429	1.62054	1.26454	1.55478
2.46527	2.05886	0.81225	0.540622		1.05946	0.99693	0.73489	0.8458	0.56423	1.20115	1.52456	1.26243	1.28846	1.53982
1.55312	1.14721	1.04582	0.547057		0.886751	0.62008	0.60791	1.11023	0.51183	0.59239	0.48549	1.64163	1.53942	1.89718
1.43013	1.05768	0.95211	0.461472		0.75778	0.72936	0.76897	0.73379	0.68287	1.5315	0.5032	1.67918	1.32789	1.54332
0.93261	0.85258	0.92634	0.716981		0.52959	0.88572	2.23587	0.76985	0.76862	0.72695	0.65084	1.70622	1.62888	1.72452
1.20104	0.9603	1.02893	0.36813		0.701505	0.66877	1.40306	0.75502	1.07591	0.84689	0.67359	1.17578	1.41009	0.86379
0.91152	0.85193	0.83695	0.72662		0.722569	0.75534	0.42058	0.73747	0.82751	0.62905	0.84398	1.58835	1.19764	1.72849
1.43442	1.07716	1.44732	0.870579		0.77606	1.84392	1.37293	0.84421	0.80603	0.51395	0.91181	1.5451	1.83348	1.30177
1.06011	0.95071	1.16311	0.758979		0.485615	0.76471	1.17763	0.85941	0.64239	0.87777	0.68458	1.64253	1.58246	1.12184
1.11513	1.06918	1.0391	1.1325		0.795256	0.58444	1.00843	0.90101	0.86684	1.85208	1.07118	1.39571	1.72691	1.53794
1.10923	1.08317	1.05945	0.810487		0.665552	0.81715	1.80385	0.64833	0.83925	0.71963	0.89975	1.49701	1.81412	1.76502
1.7341	2.54646	0.85176	0.398584		0.854957	0.92668	1.05761	0.72208	0.72735	0.90382	0.74173	1.53732	1.73153	1.62048
0.81556	0.98822	1.21751	0.370376		0.389756	0.7429	0.69358	0.57439	0.80052	0.6417	0.47396	1.85632	1.75281	1.86266
0.80271	0.97402	0.77517	0.60942		0.688611	0.97005	0.89194	0.55383	0.75789	0.75436	0.76149	1.13157	1.34864	3.0407
1.33317	0.85643	1.84447	0.589938		0.820945	0.77388	0.76331	0.47527	0.79913	0.80212	0.6015	1.72419	1.54813	1.25597
0.83803	0.99319	0.97008	0.489927		0.357838	0.53385	1.67181	0.97956	0.68004	0.71109	0.80559	1.80305	1.72457	1.37789
0.78945	0.92834	1.25625	0.613617		0.657486	0.75043	0.70082	0.39869	0.7275	0.75528	0.79088	1.8701	1.60699	1.30725
1.07851	1.14845	0.83661	0.709445		0.432708	0.77761	0.90862	0.69961	1.0019	0.64454	0.79996	1.36612	1.70087	1.85228
1.0879	1.15116	0.9921	0.578744		0.844284	0.69232	0.66982	0.9775	0.91373	0.79884	0.61294	1.75248	1.66029	1.78867
1.04061	0.97591	0.91194	0.749231		0.674738	0.86026	1.01604	1.10531	0.99343	0.78486	0.81568	1.79352	1.75415	1.99491
1.74501	0.33904	1.08705	0.606664		0.628013	0.85545	0.72554	1.18092	0.57764	0.877	0.77785	1.57108	1.54762	1.41972
1.12264	1.07295	1.22136	0.560072		0.811493	0.76989	1.55108	0.58982	0.89105	0.85979	0.67644	1.26075	1.69263	1.38688
1.07147	2.14545	1.01061	0.517773		0.49887	0.71249	2.39964	0.72802	1.09482	0.80703	0.90232	1.58771	1.82343	1.79704
1.0825	0.92371	0.82332	0.278749		0.554843	0.90294	0.76432	0.63417	0.80697	0.81198	0.51744	1.45896	1.78498	1.74657
1.14596	1.07421	0.96181	0.349532		0.865642	0.75391	0.85405	0.78268	0.8622	0.77203	0.89332	1.3567	1.26154	1.65823
0.82238	3.65187	0.96267	0.664017		0.195978	1.31908	0.48978	0.85193	1.09581	0.82083	0.80936	1.97729	1.73943	1.65403
1.06701	1.06619	1.10383	0.60271		0.494708	0.7758	0.92502	0.80568	0.557	1.87954	0.93128	1.7313	1.6247	1.69827
1.24554	0.91857	0.78715	0.349337		0.84779	0.55287	0.63671	0.91696	0.6217	0.56108	0.85287	1.58951	1.71785	1.75804
1.11408	0.71516	1.00454	0.735758		0.548825	0.71607	0.67171	0.89557	0.60882	0.80955	0.74531	1.46417	1.44114	1.60612
0.76098	1.03115	0.96592	0.669314		0.899343	0.79214	0.80013	0.87469	0.88656	1.15281	0.58946	1.68287	1.45687	1.66554
1.08068	0.92909	0.7726	0.429183		0.64656	0.78714	0.75105	0.7295	0.83106	0.94588	0.74272	1.31364	1.60489	1.55752
1.0727	0.84249	0.9812	0.473114		0.521244	1.07169	0.60474	1.01636	0.7382	0.93521	0.96491	1.68398	1.53834	1.61441
1.4263	0.98965	1.06823	0.47261		0.670093	1.99882	0.80993	0.77582	0.8273	0.77093	0.56469	1.45762	1.62236	1.57331
0.88873	1.08146	0.984	0.589696		0.571179	0.9816	0.72827	0.92513	2.20675	0.8804	0.54211	1.64401	1.39536	1.70992
1.11155	0.77271	0.92171	0.439091		0.694307	0.97644	0.90278	3.04692	0.79985	0.70122	0.71412	1.75262	0.95315	1.61083
1.08179	0.98985	0.85625	0.747557		0.699336	0.94943	0.62054	1.03749	0.55247	1.47364	0.77308	1.93934	1.54585	1.45284
1.12	0.92584	0.88947	0.828891		0.685805	0.71805	0.49741	1.24335	1.31457	0.76348	0.71149	1.75064	1.7799	1.21524
0.91033	0.98806	1.04473	0.828045		0.861174	0.68257	1.24699	0.77421	0.72624	0.92325	0.85079	0.67585	1.74214	1.30564
1.23067	0.81687	0.93149	0.739542		0.854873	0.60885	0.75357	0.59054	0.85797	0.94887	0.86393	1.56976	1.44158	1.93964
1.00674	1.08416	1.5165	1.03135		0.874856	0.77869	0.78177	0.95878	1.12257	1.18868	0.93675	1.5582	1.74133	1.31119
1.04508	0.85668	2.7679	0.61131		0.738303	1.47163	0.96206	0.83778	0.53634	0.78137	0.77715	1.21075	1.73872	1.13216
0.92475	1.03095	1.85759	0.426337		1.06393	1.17308	0.8018	0.48521	0.49735	0.66825	0.90337	1.25245	1.46709	1.60298
0.98145	1.01584	0.88453	0.546743		0.627367	0.81053	0.60809	0.86311	0.54578	0.73526	0.85056	1.92915	1.51836	1.83717
0.99398	0.82957	1.11705	0.700402		0.724541	0.5964	0.75446	0.86074	0.8076	0.65359	1.25095	1.7937	1.63023	1.42711
1.31032	1.13492	0.95216	0.664425		0.685592	0.8687	0.88117	0.63841	1.83833	0.83015	1.15261	1.83275	0.96759	1.44254
1.16697	1.18111	0.92951	0.891774		0.235237	0.92647	0.81624	1.01373	0.68546	0.89451	0.81356	1.7925	1.43292	1.6164
1.12575	2.2132	1.17631	0.64685		0.763843	0.70071	0.83812	0.78955	1.60326	0.57402	0.75468	1.37308	1.39281	1.77669
0.99716	1.09693	0.91872	0.418178		0.604758	0.77668	0.86428	1.23222	1.36167	0.79555	0.96502	1.45354	0.85707	1.76489
0.85749	0.95335	1.26923	0.594422		0.469585	0.72714	0.86544	0.72553	0.56868	0.8125	1.03133	1.32662	1.79105	1.48392
1.6278	0.89686	3.91459	0.54859		0.714927	0.87993	0.79036	0.80687	0.49394	0.98672	1.70184	0.61363	1.80785	1.13235
1.3389	0.73921	0.89446	0.709614		0.635397	0.76318	1.60968	0.67988	0.74382	0.79027	0.80339	1.6992	1.70506	1.52987
1.91432	1.113	1.09115	0.680223		0.780848	0.63388	1.02587	0.80079	0.65722	0.70393	0.73561	1.25572	1.52607	1.61237
0.85003	1.00783	1.06924	0.640639		0.36347	0.82887	0.65066	0.74548	0.65607	0.67815	0.77473	0.41794	1.46341	1.39405
1.0327	0.45192	1.04562	0.774373		0.849326	0.59564	0.61507	0.84081	0.86488	0.90504	1.0233	1.54598	0.41583	0.75969
2.08669	1.02445	0.95364	0.589893		0.613934	0.86218	0.8935	0.73384	0.87282	1.80318	0.95321	1.55358	1.75878	1.77361
0.95102	1.35278	1.10596	0.601548		1.02225	0.89492	0.63863	1.10485	0.71109	0.85527	0.50295	1.41945	1.59041	1.69756
0.88284	0.89188	1.00305	0.528416		0.856625	0.74403	0.94111	0.74913	1.96416	0.82492	0.70115	1.27549	1.64098	1.61728
1.14935	1.27785	1.60749	0.56476		0.787815	1.27716	0.93984	0.9721	0.66641	1.13813	0.50762	1.42007	1.34942	1.04477
1.21006	0.96352	0.79804	0.594228		0.882438	0.64489	1.24562	0.73257	0.94882	1.11362	0.55505	1.74999	1.67708	1.89346
1.21102	1.05461	0.90618	0.718148		0.687503	0.66259	0.67448	0.91508	1.40932	0.80219	0.66994	1.36073	1.521	1.62601
1.11148	0.81846	1.06706	0.20867		0.536959	0.78679	0.74762	0.70171	1.12374	0.68869	0.86952	1.31473	1.57258	1.51018
0.89734	0.8231	1.0378	0.556425		0.698441	0.92055	0.69713	0.82372	0.70286	0.55774	0.71896	1.87367	1.6318	1.13436
1.14245	1.00876	1.04641	0.294411		0.519263	0.9908	0.70498	0.91877	0.80872	0.61771	0.86999	1.61111	1.6968	1.61321
1.08152	0.67372	0.78166	0.751835		0.610213	1.58146	0.85541	0.98374	0.61326	0.76603	0.76959	1.63996	1.35938	1.47944
1.22282	0.87672	0.82151	0.801989		0.690849	0.92143	0.62204	0.72028	0.68549	0.72811	0.6795	1.70338	1.51336	1.27245
0.91759	1.08571	0.72967	0.537788		0.830202	0.72609	0.81061	0.74641	2.03444	0.75641	0.91469	1.04796	1.96409	1.66416
0.92785	0.89101	1.01216	0.496019		0.65908	0.67598	1.02781	0.92782	0.70755	0.88408	0.80188	1.30056	1.59058	1.8215
1.09113	1.03219	0.95225	0.872594		0.714605	1.28944	0.69011	0.96443	0.60951	0.80242	1.05885	1.10629	1.76744	1.82323
1.12797	1.10011	1.04071	0.571205		0.436805	0.72719	0.97666	0.81198	0.66636	0.84639	1.14289	1.76412	1.9252	1.59948
1.12487	1.00855	1.05192	0.575862		0.400634	0.62779	0.81784	0.69932	0.97194	0.88337	0.64345	1.54436	1.34946	1.25882
1.05871	1.11072	1.07838	0.431914		0.515314	0.66663	0.78295	0.8639	0.74894	1.87761	0.90472	1.80266	1.98336	1.2434
1.20223	1.04486	1.05757	0.660062		0.42373	0.78829	0.71814	1.98514	0.96532	0.76253	0.76606	1.67023	1.71677	1.51485
1.24018	0.83102	0.98232	0.572643		0.384481	0.5484	0.48866	2.16822	0.75339	0.98478	0.8396	1.41261	0.33578	1.44714
0.85071	0.8135	0.93909	0.530755		0.75261	0.87129	1.27928	0.7578	0.77494	0.78302	1.10385	1.61237	1.7629	1.82092
1.01525	0.93005	0.87489	0.605046		0.674997	0.8682	0.61884	0.49561	0.71976	0.96676	0.74261	1.67259	1.67172	1.95111
2.23847	0.96779	1.0824	1.38424		0.536774	1.15664	0.94642	0.72685	0.7176	0.77595	0.97425	1.34444	2.06707	2.11825
1.13727	0.8154	1.04044	0.625703		1.06992	1.71054	0.73153	0.97981	1.0159	0.99438	0.92237	1.06815	1.67624	1.38362
0.84791	1.96423	1.47918	0.834968		0.708338	0.80263	1.51771	0.72976	0.70149	0.87077	0.48384	1.14144	1.81357	1.41999
1.00324	0.64433	0.94736	0.495654		0.463699	0.48367	0.84835	0.72305	0.61257	0.78166	0.6648	1.66179	1.30579	1.84452
1.10498	0.84876	0.91084	0.432824		1.03675	0.88758	1.12889	0.8382	0.82142	1.01029	0.52487	1.73393	1.49254	1.6199
1.1248	1.24248	1.47654	0.82194		0.709206	1.0412	0.7315	0.85044	1.39126	0.72372	2.24154	1.56507	1.8065	1.92755
2.3108	0.94944	1.20007	0.331558		0.532474	0.82289	0.81434	0.82897	1.33975	1.36969	0.75937	4.39862	1.88443	1.42337
1.11221	0.85595	1.09525	0.51098		0.538966	0.77688	0.60277	0.92027	1.6598	0.8165	0.87675	1.73512	1.73912	1.64326
2.15023	0.82521	1.17784	0.55062		0.661853	0.60297	0.89383	1.03008	0.86521	0.87382	0.75082	2.23406	1.6801	1.58017
1.02338	1.09441	0.39206	3.22503		0.837147	0.5522	0.97171	0.9777	0.79296	0.98539	0.78694	1.42511	1.55477	1.54592
1.11555	1.12918	0.89394	0.656254		0.50849	1.05259	1.54565	0.96318	0.57954	0.70096	0.74347	1.45654	1.62248	1.44712
1.18775	0.94639	0.90128	0.571328		0.576259	0.98269	0.96679	0.75122	0.73642	0.94606	0.83554	1.5111	2.04648	1.5546
1.17781	0.88371	1.17692	0.704555		0.641506	1.15294	0.80339	0.97765	2.51648	0.72409	0.82884	1.32928	1.75897	1.4131
1.22764	0.89209	0.77645	1.23696		0.958773	0.7402	0.83522	0.90133	0.68602	0.7919	0.67712	1.51154	1.25954	1.82334
0.81776	0.89473	0.99846	1.07819		0.57193	0.89991	0.88298	0.88086	0.74314	0.96634	0.96938	1.37636	1.48717	1.34575
0.9573	1.0655	0.80916	0.911958		0.437309	0.80219	0.86732	0.6639	0.67566	0.70619	0.66231	1.6539	1.46751	1.50672
2.62181	1.04675	1.40462	0.55272		0.778466	1.75987	0.69553	0.93764	1.82316	0.73697	0.41547	1.42266	1.72988	1.86533
0.92744	0.93636	1.21426	0.950488		0.774506	0.90578	0.96456	0.87639	0.77759	0.70757	1.66955	1.70646	1.60465	1.45965
1.07375	0.90235	1.01505	0.661846		0.908024	0.88238	0.86591	0.75697	0.751	0.81043	0.49933	1.58444	1.56805	1.58174
0.84269	0.99989	1.22396	0.600868		0.659814	0.85973	0.79781	0.45466	0.71129	0.87081	0.85476	1.30488	1.27476	1.3711
1.27013	0.64711	0.85767	0.618258		0.642669	0.65948	0.96846	0.89461	0.69297	0.76231	0.92919	1.30154	1.82326	1.70891
1.00012	1.25317	1.2176	0.775777		0.534379	0.8199	0.86421	1.51008	0.8032	0.63817	0.39559	1.68451	1.76627	1.61409
0.89757	1.38512	1.0634	0.497794		0.754259	1.01787	0.79204	0.84523	0.67707	0.79988	0.86834	1.45875	1.77835	1.75328
1.09365	0.67718	1.12283	0.709361		0.59525	1.18969	0.69962	0.83182	0.82831	0.77264	0.71578	1.61687	1.25782	1.61128
1.00664	1.17015	1.06673	0.704026		0.741036	1.08155	1.03186	0.89075	0.77813	0.80594	0.83805	1.89976	0.97713	1.62699
1.14741	0.74575	0.87749	0.690575		0.859818	0.78265	0.6172	0.91969	0.95638	3.00875	0.83153	1.72866	2.2312	1.41746
0.80755	0.86784	0.99956	0.484592		0.622367	0.74525	0.53062	0.801	0.73919	0.69803	0.89219	1.56816	1.5567	1.54121
1.18125	0.87217	1.01986	0.506514		0.772658	0.5356	0.65633	0.80523	0.5394	0.99091	0.70019	1.52504	1.68324	1.73728
1.32601	0.81272	1.20102	0.573828		0.474866	0.77959	0.89934	0.87527	0.89931	0.71249	0.78593	1.64074	1.55025	2.45101
0.97125	1.13098	1.67169	0.648711		0.998882	1.04325	0.95108	0.99461	0.58215	0.9504	0.86474	1.32345	1.70702	1.58149
1.49611	1.12282	0.45136	0.399435		0.835618	0.76508	1.05101	0.87515	1.94839	1.00982	0.87879	1.59866	1.7972	1.64462
0.87696	0.92409	0.90645	0.682916		0.861921	0.94345	0.6932	0.94111	0.77576	0.75466	1.07655	1.41866	1.31814	1.7607
1.18193	1.01642	0.96223	0.825114		0.477673	0.66189	0.81063	0.82175	0.74239	0.64836	1.0559	1.59157	1.80713	1.4681
1.23509	2.08123	0.88034	0.166586		0.539579	0.81046	1.01642	1.0422	0.86299	0.7288	1.03241	1.38871	1.38417	1.67515
0.88792	0.85107	1.05154	0.800956		0.572139	0.79341	0.91298	0.59957	0.86893	0.78902	0.62811	2.00687	1.65546	1.66475
1.10523	0.85095	0.81839	0.730455		0.367234	0.8907	0.96234	0.6976	0.85117	0.92465	0.73954	1.22525	0.76923	2.41646
1.01226	0.71431	1.55756	0.399868		0.397521	0.66956	0.87678	0.78547	1.01682	0.93191	1.37174	1.71632	1.64675	1.71987
1.00458	2.52998	0.98163	0.519683		0.632403	1.14328	0.73396	1.22671	0.69623	0.78936	0.83552	1.59379	1.43112	1.71075
0.83118	0.83145	1.17791	0.639321		1.05519	0.75504	0.99186	0.80133	0.68118	1.048	0.84101	1.30451	1.94572	1.66769
0.85693	0.9419	0.55563	0.559135		0.663148	0.99325	0.71887	0.86529	0.73389	0.64253	0.69813	1.28671	1.57219	1.91091
0.91358	2.52114	0.93429	0.648114		0.775784	0.6213	0.70955	0.6163	1.76576	0.95518	2.04673	1.44644	1.62685	1.71768
1.19568	0.74236	0.81341	0.915007		0.599948	0.8057	0.68055	0.8488	2.27417	0.74741	1.87034	1.69259	1.29589	1.46994
0.96539	0.91531	0.9147	0.750516		0.523482	0.8325	1.0107	0.92001	0.74949	0.792	0.8945	1.76008	1.77317	1.29657
1.19586	0.81249	0.64418	0.648163		0.795405	0.95261	0.75807	0.80888	0.77529	0.92575	0.70755	1.4949	1.58578	1.27655
0.75064	1.95783	0.95693	0.403354		0.802842	0.56825	0.90213	0.87871	2.31034	0.92455	0.65331	1.56674	1.99275	1.64032
1.04561	2.12552	0.88092	0.40611		0.691225	0.72407	1.05232	0.8424	0.55657	0.96752	0.85353	1.13001	1.43943	1.36211
1.05194	2.72466	0.92111	0.539196		0.609317	0.7742	0.8639	0.86695	1.8757	0.83836	0.85151	1.51003	1.82275	1.45641
0.93201	1.14278	4.92509	1.02747		0.596082	0.86504	1.1173	0.94172	0.58685	0.95218	0.87798	1.46661	1.37396	1.50704
0.69652	1.80635	1.0574	0.832121		0.921506	0.84488	0.55048	0.80882	0.71898	0.6983	0.83325	1.7961	1.46302	1.27578
0.62918	0.92368	1.07158	0.669349		0.914751	0.71578	2.2522	0.97103	0.86308	0.99922	0.58489	1.71212	1.27398	1.58769
1.09839	0.89764	0.86852	0.371339		1.16076	1.01868	0.70804	0.88229	0.91763	0.84723	0.67234	1.67956	1.25678	1.4099
1.063	0.98293	1.83135	0.685546		0.848362	1.04361	0.70629	0.65265	0.64629	0.85768	0.71885	2.3678	0.68151	1.60396
2.30882	1.27587	0.95113	0.466386		0.554368	0.73581	0.64751	0.52899	0.78085	0.70315	0.77569	1.83973	1.7477	1.54726
1.18966	1.12847	0.93835	0.664831		0.893218	0.89871	0.71214	0.796	0.63936	0.84984	0.77504	1.64441	2.05584	1.7299
2.73401	0.92489	0.9043	0.863885		0.533387	0.79345	0.96846	0.77236	0.95504	0.61105	0.68757	1.65852	1.69189	1.31967
0.76048	1.23206	1.25825	0.668319		1.04748	1.55904	0.64087	0.57324	0.90267	0.69416	0.58289	1.56842	1.77122	1.53303
0.83925	0.88562	1.0289	0.767883		0.506677	0.83373	0.88765	1.22517	0.87975	0.92949	0.90267	0.95959	1.32244	1.58009
2.31698	0.8259	1.04693	0.286177		0.751433	0.92073	0.69807	0.81234	0.75672	0.73542	0.36953	1.27187	1.72804	1.4661
0.85447	0.77957	1.0884	0.750936		0.840713	0.95293	0.83957	0.60102	0.84616	0.66078	0.75411	1.79939	1.7958	1.44814
2.88647	0.80595	1.22241	0.499546		1.09125	0.90639	0.79555	1.09842	0.7255	0.87671	0.56141	1.99068	1.70518	1.65033
1.06011	1.01556	0.86642	0.336866		0.663655	0.92346	0.85585	0.75042	0.72562	1.5224	0.92374	1.25916	1.53354	1.73134
1.0148	0.96954	0.9201	0.409818		1.46643	1.16952	0.63389	0.94603	2.21433	1.08328	1.46039	1.51331	1.73417	1.02377
0.83083	1.00161	1.80145	0.691585		0.712488	0.8889	1.77579	0.73757	0.70871	0.72796	0.95836	1.0657	1.38201	1.45805
1.16958	0.80082	0.8813	0.762463		0.365142	0.90736	0.52969	0.63343	0.858	0.68201	1.00159	1.65631	1.69576	1.53612
1.54094	1.01915	0.77473	0.429212		0.908006	0.80889	1.39927	0.86357	0.90065	0.81282	0.66719	1.49932	3.03414	1.17637
0.55747	0.6583	0.99453	0.339172		0.472685	1.69084	2.66405	0.73755	0.67187	0.51919	1.94168	1.7154	1.62919	1.88212
1.01553	0.78064	0.90368	0.360425		0.699713	0.79183	0.82075	0.77698	0.72947	2.39059	1.10846	1.50481	1.1228	1.29444
0.5773	0.98368	0.85236	0.57534		0.646026	0.85497	1.13895	0.77499	0.87548	0.90712	0.50749	1.5952	1.75749	1.64872
1.11186	0.97763	1.01247	0.474448		0.910069	0.75864	0.92445	0.80298	0.58013	0.76592	1.08041	1.44607	1.69597	0.43901
2.7179	0.9528	1.17969	0.606846		0.672873	0.80709	0.91328	0.95503	1.63893	0.77511	0.82933	1.36652	1.25438	1.61808
1.92035	0.91046	0.88141	0.449952		1.08988	0.7383	0.81547	0.61248	0.95333	0.71846	1.1287	1.69684	1.74599	1.36669
1.90804	0.79239	0.87328	0.858245		0.733397	0.8569	2.43656	0.91808	0.37541	2.23636	0.83435	1.74324	1.48511	1.75702
0.97152	1.73292	1.24034	0.680403		0.334875	0.96877	1.34708	0.80944	1.23861	0.59824	0.86658	1.8416	1.63762	1.53478
1.29283	0.74976	1.03934	0.611394		0.493146	6.95371	0.89832	0.70363	0.81817	0.77195	1.10386	1.48575	1.71953	1.10628
1.04894	0.57348	0.9207	0.877543		0.837651	0.94477	0.65398	0.5273	0.8272	0.70599	0.81847	1.9853	1.96913	1.24706
1.00246	1.74657	0.85511	0.530251		0.644093	0.7565	0.98779	0.89332	1.65713	0.80388	0.79895	1.04859	1.18796	1.75314
1.52585	0.81879	0.66626	0.597405		0.616806	0.8473	1.40708	0.72665	0.52104	0.77007	0.852	1.42662	1.74457	1.82046
1.19756	0.9236	0.98434	0.53878		0.898913	0.93665	0.92278	0.50849	0.77828	1.04457	0.77385	1.59533	1.55339	1.58244
1.34276	0.85962	1.03408	2.6729		0.449845	0.75766	0.70839	0.7531	1.06704	2.77558	0.69974	1.68535	1.81873	0.9107
0.90877	1.03283	1.81256	0.271633		0.770419	0.88832	0.63299	0.74719	0.74503	0.6184	0.79896	1.64332	2.04133	0.75655
0.89129	1.54049	0.56313	0.634076		0.562739	0.99035	0.73337	0.6691	0.88061	0.7641	0.98444	1.48029	1.50998	1.78601
0.7796	1.74396	1.03974	0.471041		0.806606	1.0288	0.8624	1.01989	0.80475	0.87842	1.02306	1.55483	1.24068	1.8912
1.08049	0.89712	0.92908	0.514452		0.480093	0.80033	0.63578	0.84284	0.79719	0.64241	0.68248	1.71077	1.51441	1.72444
0.85399	1.37232	1.09543	0.914516		0.560347	1.02957	0.85792	0.75616	0.80524	0.72768	0.97849	1.64144	2.48676	0.72566
0.73907	0.75887	1.0522	0.445927		0.619767	1.77204	1.02382	0.62264	1.11226	0.70306	0.9906	1.68722	1.30451	1.50839
1.01818	1.08637	0.97468	0.370214		0.563055	0.73604	0.98478	0.66177	0.61451	0.69393	0.65389	1.48611	1.51718	1.59985
0.90155	1.06936	1.80334	0.704623		0.72783	0.75351	0.74261	0.73165	0.7233	2.58151	0.69614	1.35573	1.65528	1.90441
1.13579	0.7415	0.88442	0.680564		0.606224	1.01692	0.71057	2.06593	2.93964	0.81714	0.91064	1.427	1.25974	1.83121
0.93056	1.20466	1.10797	1.94503		0.693796	0.76592	0.81455	0.77697	0.81453	0.96595	0.69833	1.39683	1.67908	1.20585
1.00504	1.75784	0.85734	0.579997		1.03806	0.76595	0.88447	0.78117	0.93803	0.94513	0.80956	1.22338	1.38264	1.76385
1.09874	0.87297	0.93383	0.614325		0.489019	1.29173	0.49506	0.30776	0.77734	0.77246	0.85022	2.3807	1.58685	1.66933
0.96484	1.00559	0.88953	0.574109		0.698727	0.81483	0.64278	0.78126	0.8308	0.59149	0.8812	1.37229	1.36806	1.18024
1.09223	0.87455	0.85085	0.818158		1.06247	0.9049	0.84385	1.01776	0.90366	0.7322	0.81391	1.15968	1.42764	1.41044
0.95099	0.8745	0.88949	0.538639		0.615892	1.062	0.91859	0.6608	0.76023	0.84496	0.77108	1.52982	1.53001	1.801
0.72506	0.89928	1.7151	0.755811		0.778277	0.68943	0.92066	0.83736	0.81201	0.91945	0.89529	1.39169	1.60439	1.49895
1.13285	0.82196	0.83344	0.971698		0.869141	1.06481	0.46946	0.79285	0.65964	1.06092	0.84063	1.42699	1.71764	1.55316
1.05376	0.89606	1.06689	0.72609		0.875031	0.57078	0.78172	1.06827	0.78497	0.74393	2.22628	1.6998	1.16308	1.79423
0.64982	0.73998	1.17411	0.714637		0.596168	1.52307	0.69818	0.7018	0.59156	0.88147	0.83113	1.13159	1.44316	1.45823
0.87211	0.91608	0.84923	0.789909		0.904814	0.99107	0.93447	1.60973	2.53498	0.82091	0.82248	4.44516	1.81131	1.6121
0.94812	0.87024	0.72318	0.817722		0.733816	0.50592	0.46772	1.00018	0.87836	1.5933	1.05625	1.58067	1.41325	1.65883
0.76526	2.04719	0.97121	0.575624		0.692386	0.99542	0.97486	0.92306	0.80701	0.91782	0.90195	1.79443	1.79312	1.50581
1.06362	0.99216	1.29992	0.42965		0.42771	0.71863	0.85685	1.10545	0.86784	0.92049	0.77584	1.90042	1.23606	1.60667
0.88427	0.90884	0.85734	0.890586		0.686443	1.24401	0.83484	0.59284	0.70142	1.7146	0.75308	1.39803	1.62538	0.95647
0.87033	0.65997	0.88003	0.171182		0.417832	0.67621	0.55251	0.88127	0.76592	1.9251	1.79829	1.70888	1.69587	1.48106
0.93764	0.7063	0.91449	0.644226		0.641909	0.82266	0.85991	0.77142	2.07347	0.73903	0.78025	1.76484	1.29801	1.61945
0.65125	0.91953	0.99569	0.504775		0.728254	1.08947	1.52979	0.92032	0.95943	0.7645	0.67788	2.21802	1.6174	1.65705
1.90627	0.95558	0.85865	0.983507		0.629313	0.95465	0.884	0.55413	0.74172	0.8799	0.65437	1.6752	1.70299	1.80701
0.96356	1.02665	0.93095	0.703884		1.08065	0.92505	0.7245	0.76985	0.8308	0.71955	1.81382	1.6721	1.74019	1.87731
0.94725	0.5625	0.80168	0.453741		0.665958	0.62294	0.95981	1.12708	0.76908	1.81936	0.79574	1.59221	1.67941	1.81955
1.03676	0.77814	0.96358	0.998251		0.812677	0.90913	2.01505	0.99836	0.56553	1.0218	1.29479	2.08436	1.77687	1.55457
1.10075	0.90209	1.08163	1.709		0.7989	1.01237	0.77463	0.98389	0.76957	1.42078	0.67339	1.41292	1.71285	1.76229
0.99925	1.0146	1.09664	0.506617		1.21914	0.87535	0.77741	0.71208	0.8451	0.87406	0.78855	1.76504	1.68953	1.76273
0.94276	0.90139	1.2158	1.07923		0.711445	1.96735	1.36382	0.62265	1.73006	0.68176	0.84291	1.27662	1.93269	1.47448
1.15939	0.98842	0.88654	0.790924		0.591074	0.67354	0.42183	0.80736	1.35058	2.16453	0.87704	1.81134	1.60655	1.61801
0.90199	0.52033	1.03813	0.250531		0.7846	0.77483	0.87786	0.6754	0.95745	1.0411	0.65699	1.67563	2.06757	1.65477
2.05366	0.74172	0.8223	0.826033		0.768469	0.87928	0.67796	0.81646	0.85409	0.79223	0.91722	1.84981	1.3823	1.37507
1.09617	0.97162	1.18608	0.469091		0.617951	1.07401	0.8188	1.00608	0.8028	2.50814	0.90567	1.41793	1.25202	1.72355
1.0634	0.70021	0.87751	0.703101		1.01804	0.67502	0.681	1.22249	0.79029	0.89337	0.78142	2.04776	1.49056	1.83656
1.20033	1.37488	0.98246	0.776456		0.623416	0.83505	1.04216	1.87869	1.12592	0.67454	2.31819	1.29048	1.21021	1.27754
0.9658	0.85343	0.96601	0.62884		0.819607	0.95517	0.72719	0.83869	2.07264	2.05444	1.02545	1.66344	1.44539	1.0457
1.31848	0.87925	0.86706	0.836704		0.83761	0.95712	0.66903	0.86094	0.94037	0.77728	1.37438	1.72367	1.64942	1.77546
1.02078	1.64681	0.98832	0.811209		0.452789	0.76847	0.66969	1.74813	0.69446	0.89689	0.86587	1.87975	1.43009	1.60414
1.02968	0.91729	1.30544	0.586654		0.36875	0.63453	0.75038	0.70034	0.81678	0.95121	0.69735	1.97332	2.54274	1.36805
1.10181	0.72682	0.85319	0.519785		0.663776	0.81465	0.80423	1.32081	0.62751	1.70015	0.86972	1.89108	1.70158	1.94118
0.97845	0.98722	1.46082	0.715023		0.822482	0.87098	0.77415	0.78421	0.65923	0.85062	0.75309	1.42467	1.32485	1.70729
0.77607	2.22507	1.06014	0.77995		0.454547	0.98976	0.92052	1.20886	0.86414	0.90116	0.9107	3.24871	1.16654	1.61287
0.68763	0.85991	0.94176	0.705325		0.501747	0.50768	0.84246	0.62936	0.91396	0.55391	0.76295	1.52111	1.24556	1.75518
1.24003	0.96832	1.09321	0.631427		0.660072	0.66643	0.7626	1.28057	0.67004	0.66801	0.92258	0.98233	1.71692	1.32169
2.6059	0.8863	0.71881	0.627495		0.454031	0.96055	0.69373	0.8116	0.92051	0.81141	0.87644	1.76316	1.80086	1.65239
0.98027	2.61694	0.98945	0.687535		0.476241	0.75781	0.97219	0.89091	0.62381	0.65917	0.82618	1.67805	1.74304	1.54117
0.87059	1.12104	1.11425	0.518122		0.705867	0.81814	1.03817	0.81862	1.66801	0.61116	0.65056	1.27735	1.49915	1.55109
1.43798	1.12158	1.1772	0.539896		0.624396	0.80716	0.72814	0.5073	0.69125	1.20909	0.88238	1.64554	1.52394	1.25807
1.25232	1.28548	0.90643	0.482656		0.677188	0.57085	0.71848	1.46001	0.74001	0.77385	0.63299	1.63635	1.82882	1.78068
1.1869	0.93659	0.95371	0.874554		0.72871	0.85746	0.57015	0.70139	0.63993	0.56825	0.82015	1.82742	1.51302	1.77587
1.21208	0.74479	1.12208	0.55545		0.508489	0.97276	0.57022	1.12042	0.9185	0.72601	1.49592	1.56281	1.28608	1.2631
1.25022	1.2759	0.94395	1.23186		0.661095	0.98656	0.70936	0.94706	0.90333	0.80498	0.94812	1.50915	1.69281	1.51842
0.9408	0.88356	0.58514	0.668324		0.828249	1.62978	1.61736	0.90724	0.74958	0.77772	0.88526	1.78972	1.96484	1.63754
0.86562	0.99669	1.30733	0.69649		0.787032	1.62456	0.62869	0.86882	0.76189	0.68044	1.02684	1.61138	1.58092	1.46304
0.91663	0.98958	0.96449	0.393967		0.919064	0.88598	0.74952	0.83952	0.66814	0.94279	0.76613	1.07943	1.72663	1.68424
0.94779	1.20457	0.9416	0.452661		0.976929	0.79816	0.5924	0.61656	0.66172	0.60164	0.69292	1.61069	1.08686	1.37137
1.32758	1.09137	0.94861	0.641989		0.683945	1.66571	0.63844	0.80222	0.71205	0.74468	0.4658	1.53675	1.35215	2.24902
1.10316	0.65589	0.92819	0.4342		0.754377	0.53449	1.01081	1.05655	1.00529	0.8943	0.6788	1.87553	0.81376	1.31725
0.77212	1.1298	1.03368	0.729884		1.03666	0.79481	1.27982	0.65012	0.7849	0.6478	0.89016	1.79244	1.81874	1.69823
1.11411	1.09492	1.21188	0.785471		0.678282	1.05712	0.74143	0.7928	0.78581	0.79845	0.76328	1.7914	1.77581	1.36244
1.6302	1.06234	1.2025	0.660709		0.687576	1.00732	0.67347	0.87254	0.69887	2.61517	0.99788	1.66114	1.56409	1.65529
2.69728	0.95558	0.92943	0.630233		0.726826	0.85353	0.66489	0.96561	0.77563	0.6956	0.58867	1.60732	1.19145	1.43042
0.80613	0.67154	1.02901	0.670195		0.839355	0.75632	0.62458	1.02561	0.99489	0.72938	0.91123	1.82929	1.95564	1.57636
0.96897	0.90362	1.52625	0.795579		0.877774	0.94478	0.75411	0.64711	0.54926	0.8542	0.75484	1.42082	1.80413	1.89232
1.0897	1.77978	0.95588	0.454728		0.674821	0.70292	0.63151	0.86813	1.0621	0.75662	0.92456	1.92598	1.50226	1.67863
0.76172	1.0565	0.75564	0.695756		0.424236	0.85643	0.93058	0.96437	0.47714	0.83192	1.13078	1.72759	1.69828	1.13063
1.08005	0.98709	1.12096	0.795357		0.817915	0.86824	0.69483	0.84951	1.50742	0.79624	1.87003	1.02385	1.28215	1.80111
0.88608	1.81967	0.92961	0.686508		0.648077	0.85593	0.59544	0.92557	1.54482	0.4565	0.61508	1.57916	1.91231	1.42943
1.06592	0.97351	1.09712	0.412875		0.700101	0.76508	0.79251	0.73624	0.43811	0.78538	0.80886	1.70744	1.7543	1.41504
0.83188	2.35762	0.84942	0.370993		0.685226	1.02184	0.82628	0.84933	0.68764	0.79249	0.58547	1.666	1.61563	1.42999
0.72139	0.9794	1.73861	0.693982		0.828594	1.10641	0.62571	0.83032	0.47982	0.91021	0.62593	1.65964	1.64209	1.70013
1.02721	0.5466	0.8609	0.650059		0.642752	0.67401	0.74276	0.64416	1.07326	0.65985	0.94717	1.49258	0.95203	1.81566
0.72996	0.75221	0.91519	0.693656		0.417794	1.64056	0.94444	6.44357	0.64627	0.7869	0.85427	1.37373	0.82505	1.25878
0.95995	0.8551	0.9359	0.937017		0.707489	1.10458	0.75681	0.91112	0.79305	1.93173	1.34269	1.78322	1.6041	1.57545
0.93191	0.64281	1.08668	0.464844		0.805231	0.72863	0.60727	0.58708	1.77401	0.98324	1.8614	1.68558	1.5853	1.56684
0.94566	1.05446	0.4955	0.810047		0.827116	3.2411	0.53817	1.01235	2.05821	1.00515	0.816	1.35077	1.90084	1.60144
1.03558	1.02356	0.76295	0.611023		0.680323	0.93914	0.9015	0.88588	2.46697	0.60464	0.8339	1.39659	1.87538	1.78382
0.92893	0.89942	1.0497	1.16284		0.438827	0.727	0.70499	1.00807	0.76042	2.37672	1.87888	1.73632	1.622	1.85324
1.55615	1.82435	0.78949	0.67817		0.720055	0.60288	0.86534	0.52745	1.01741	0.77342	0.82442	1.70636	1.74609	1.58709
0.87566	0.73809	1.13536	0.73489		0.869666	0.70512	0.85776	0.78963	1.00114	0.69049	0.95147	1.48842	1.58946	1.21316
1.04695	0.99633	0.80591	0.772162		0.463468	0.9503	0.96695	0.84245	0.46226	0.69892	0.84487	1.45567	1.16925	1.57746
1.10739	0.98945	1.65055	1.10718		0.55832	0.68989	0.89295	0.7317	0.94195	0.78427	0.55316	1.22289	1.65266	1.51963
0.78408	1.21848	0.4435	0.737129		0.848828	0.90678	1.14714	0.82036	0.6301	0.90897	1.29591	1.74013	1.75376	1.85476
0.98449	1.0353	0.99937	0.520015		0.754875	0.99998	0.72166	0.83653	0.60599	0.78096	0.62896	1.67626	1.72292	1.51025
0.81221	1.159	1.3758	0.544853		0.61818	1.17765	0.66539	1.82582	0.88649	0.61909	0.79914	0.93852	1.61476	1.2394
2.27552	0.89881	0.61839	0.845838		0.532091	0.71838	0.80743	1.35258	0.78067	0.65344	0.65581	1.63142	1.68927	1.57668
1.22763	1.13264	0.85418	0.698864		0.680108	1.02153	0.81257	0.92618	0.6253	0.5	0.81214	1.1304	1.72209	1.8602
1.02691	1.97053	1.28135	0.653471		0.655347	1.04283	0.72036	0.70732	0.89128	0.74812	0.61717	1.98416	1.3266	1.21182
1.15951	1.19018	1.14673	0.327698		0.693214	1.2348	0.70427	0.71288	0.68155	0.8724	0.84396	1.57968	1.84564	1.67925
0.5528	0.94914	0.91762	0.614282		0.54007	0.44125	0.85182	0.48375	0.74858	0.77888	0.88027	1.32527	1.97244	1.85605
0.97975	0.87587	0.81774	0.750977		0.41081	0.72423	0.66671	1.9319	0.5598	0.69928	0.54223	1.46395	1.38063	1.15678
1.05315	1.02694	0.87865	0.478486		0.947831	0.83166	0.65044	1.26973	0.57721	1.00883	0.82169	2.37284	1.73843	1.69875
2.07931	1.07035	2.29811	0.588691		0.575317	1.04909	0.87263	0.74503	0.76345	0.8636	0.96173	1.56068	1.79753	1.64744
1.15806	1.01689	1.08944	0.576325		0.682578	0.70171	0.35644	1.0739	1.07557	0.75439	0.97223	1.72972	1.63978	1.59539
1.16456	0.80446	0.75947	0.418262		0.870677	0.8291	0.77163	0.86592	0.51132	1.0183	1.4446	1.87935	1.78982	1.87734
0.77934	0.95664	0.65362	0.531492		0.796099	0.45904	0.76178	0.9717	0.7986	0.55358	0.85453	1.2661	1.72579	1.47841
1.13807	0.82998	0.92201	0.782734		0.704497	1.20943	0.84531	1.16064	1.11718	0.94823	0.67152	1.52932	1.74105	4.59372
1.1823	1.93361	0.99618	0.849839		0.998816	1.65823	0.88668	1.11832	0.74336	2.27658	0.73212	1.79674	2.096	1.49155
1.19805	0.90105	1.01022	0.649728		0.451574	1.4727	0.7145	0.81512	0.71511	0.71649	0.84133	1.29013	1.5298	1.58321
1.02199	0.93934	0.85878	0.530332		0.772591	1.04638	0.97445	0.68034	0.77602	1.20097	0.6085	0.8859	1.64448	1.67831
1.43246	2.089	0.93171	0.88018		0.632262	1.28471	0.57745	1.03442	0.76695	0.87597	0.86154	1.75101	1.3279	2.30596
0.58455	2.35561	1.07621	0.747474		0.170538	0.85766	0.56458	0.50859	0.82932	1.27389	0.74504	1.70702	1.58167	1.06501
3.49459	1.09427	0.90068	0.554769		0.763941	0.79898	0.7627	0.96239	0.70103	0.87053	0.76956	1.58391	1.73516	1.19915
1.79286	1.13779	1.71524	0.469407		0.725966	0.82255	1.0584	0.79818	0.39891	0.90457	0.6421	1.81361	1.90698	1.70878
2.21863	2.4967	0.99017	0.637939		0.675784	1.52086	0.55969	0.9119	0.8221	0.7188	1.49252	4.3337	1.64532	1.19869
1.54178	0.81643	0.87768	0.704322		0.709981	0.82935	0.77878	0.78639	0.97157	0.76722	0.86755	1.57523	1.89312	1.87793
1.07376	1.29964	1.6669	0.717135		0.766202	0.73699	0.82901	0.79508	0.93518	1.53508	0.65193	1.45925	1.17645	1.73204
0.82654	0.95775	0.91602	3.61503		0.499476	0.93649	0.7409	0.903	0.96019	0.60416	0.69866	1.45257	1.42727	1.66779
1.00532	0.97816	1.70165	0.720216		0.380272	0.63084	0.59693	2.07554	1.75377	0.7075	1.02392	1.67879	1.61714	1.84657
0.90415	0.99734	0.66893	0.34331		0.734925	1.52177	0.70911	0.83374	1.02226	0.95037	0.9963	1.57696	1.77451	2.14008
0.98261	0.70039	0.98376	0.580806		0.67958	0.78905	0.79554	0.94375	1.00669	0.8797	0.42007	1.41331	1.48075	1.54028
1.06675	1.22491	1.04385	0.59477		0.759921	0.99093	1.02448	0.77552	0.71412	0.58417	0.64233	1.64977	1.62292	0.16485
1.15454	1.06971	0.90437	0.768023		0.698448	0.88131	0.91895	0.7633	0.80204	1.28247	0.76919	1.37881	1.73385	1.55814
1.70519	1.04797	1.34041	1.64358		0.647551	1.01945	0.6718	0.39738	1.05968	0.75407	0.76879	1.77449	1.77566	1.78494
1.00644	0.706	1.11944	0.618596		0.764689	0.83661	1.02769	0.84556	1.96709	1.01745	0.76966	1.57671	1.11195	1.58119
0.99855	1.32142	0.89707	0.574868		0.55437	0.96781	0.77361	0.87184	0.77484	0.8255	0.80407	1.91572	1.66437	1.73777
1.45243	0.78279	0.8233	0.45575		0.395301	0.8235	0.84227	0.55655	0.63402	0.87557	0.87543	0.90777	1.52644	1.85835
1.07619	0.81787	1.72806	0.570383		0.584512	0.63775	0.84983	0.78174	0.82258	0.57385	0.82847	1.61813	1.55831	1.4625
1.20119	0.82224	0.87618	0.771703		0.505929	0.43897	0.56239	0.83559	0.81515	0.60632	1.00545	1.76903	1.63063	1.69441
2.25196	0.91201	0.89568	0.684503		0.800312	0.83216	0.70604	1.76699	0.81463	0.77149	4.67642	1.84155	4.23532	1.4494
1.02776	0.89666	1.08069	0.303925		0.888237	0.73915	0.88957	0.82304	0.61157	0.62415	2.50636	1.53662	1.83516	1.75186
0.79612	2.84958	0.85429	0.257827		0.574177	0.91592	0.46186	0.91136	2.89919	0.75482	0.83146	1.92041	1.20738	1.67391
1.02018	0.74293	0.98337	1.05277		0.783469	0.78585	0.74057	1.07713	1.00424	0.67351	0.82488	1.78233	1.17509	1.47351
1.35096	1.02592	2.40003	0.493298		0.789365	0.73399	0.81552	0.81083	0.78598	0.62646	0.95143	1.1786	1.68772	1.57766
1.06796	0.79706	0.86768	0.41256		0.782918	0.67871	0.68743	0.83834	0.82842	0.73479	0.65991	1.7614	1.43296	1.00279
0.83657	1.15257	1.31109	0.471658		0.646097	1.03106	2.84139	0.79402	1.34384	2.52174	0.78845	1.81808	1.83465	1.64352
0.9545	0.71338	1.13957	0.63121		0.886892	1.03754	0.93371	0.82639	0.57139	0.93882	0.9524	1.42917	0.8682	1.59411
0.85484	0.72813	1.03256	0.62692		0.537775	0.78662	0.3891	0.57569	0.46869	0.8663	0.85987	1.34924	1.95585	1.44172
1.09417	1.26707	1.67839	0.761674		0.902492	1.95112	0.73258	0.74834	0.97349	0.66671	0.88489	1.90539	1.07401	0.8428
1.03842	1.04015	1.93752	0.765767		1.30728	0.63147	1.07766	0.82521	0.70951	0.75025	0.8661	1.45406	1.58402	0.63827
0.95027	0.73204	0.90407	0.374216		0.864221	0.54765	1.08846	1.06146	0.93517	0.84083	0.81823	1.32501	1.14738	1.71338
0.77659	0.78134	1.02138	0.689531		0.920548	0.97723	0.92522	0.61646	0.77746	0.74893	0.89425	1.51722	1.5474	1.28111
0.76607	0.67316	0.94156	0.614807		0.710751	0.58696	2.92785	0.84433	2.54103	0.79232	0.96491	1.1681	1.58219	1.98871
1.11991	1.09376	1.09903	0.735741		0.627352	1.44951	1.27985	0.95058	0.64142	0.68782	0.73613	1.52063	1.11796	1.85764
1.06626	0.89662	0.99401	0.871245		0.660265	0.84521	1.54941	0.44252	0.76659	0.5899	0.59186	1.35159	1.81004	1.57546
1.6445	1.1663	0.97245	0.6718		0.833754	0.78928	1.8461	0.80101	1.28782	0.78766	3.28475	1.73107	1.46698	2.43787
0.79341	0.85167	0.93408	0.600378		0.565998	0.34812	0.66248	1.13189	0.74643	1.50488	0.90073	1.86255	1.43473	1.6166
0.84754	1.06682	0.9499	0.513108		0.657472	0.88161	0.80928	0.90965	0.72605	0.87675	0.85335	1.25017	1.57159	2.13842
0.92284	1.27938	1.07438	0.666142		0.897146	0.77037	0.56502	0.94826	0.65798	0.8118	0.81909	1.69786	1.80469	1.05821
1.16562	0.94023	0.77592	0.522403		0.273998	0.84603	0.39252	0.67226	0.76588	0.76519	0.91246	1.77617	1.6796	1.56898
0.83455	0.94063	0.78641	0.626653		0.403922	0.71967	0.94166	0.81096	0.67495	0.90132	0.8604	0.97136	1.64674	1.319
1.13093	1.62854	0.96652	0.523523		0.30559	0.63768	1.03376	1.01577	1.29004	0.76488	0.75786	1.6854	0.34064	1.8711
1.43526	1.7812	1.22273	0.483887		0.635855	0.57173	0.85964	0.96056	0.91419	0.64761	0.71753	1.40351	1.7149	1.72577
1.10015	1.17393	1.06538	0.45677		0.594474	0.85515	0.86821	0.96039	0.88086	0.65801	0.70102	1.68646	1.36606	1.47711
2.25074	0.92591	1.09532	0.726841		0.499037	1.00405	0.60585	1.07288	0.76762	0.69912	0.73763	1.31091	1.75303	1.53337
1.10676	0.56044	1.08708	0.519302		0.386571	0.95275	0.93182	0.79246	0.75506	0.54169	0.66848	1.67074	1.65972	1.59435
0.82308	1.09517	0.96257	0.335716		0.809734	0.88314	0.77617	1.0763	2.29188	1.75502	0.8788	1.53257	1.65459	1.66953
0.86146	0.88153	0.99509	0.636837		0.729583	0.81621	0.71528	0.72462	0.87282	1.7787	0.85833	1.92239	1.93239	1.693
1.13235	1.16644	0.73971	0.692303		0.818275	0.92637	0.95801	0.97181	1.73215	0.82976	1.27506	1.26342	1.96961	1.29564
0.92491	0.99651	0.97638	0.507692		0.63997	0.78558	0.94996	0.84381	0.71394	0.74554	0.6162	1.73343	1.62662	1.39289
1.16893	2.51751	1.58289	1.04522		0.531842	0.73509	0.93627	0.74561	1.77107	0.65915	0.77513	1.12894	1.75707	1.46853
1.12469	0.73177	0.63045	0.808769		0.69945	0.86147	0.92664	0.96115	0.75984	0.79847	0.81557	0.6083	1.72606	1.58972
0.98515	0.93757	0.85023	0.656936		0.305168	1.00816	1.17877	0.83639	0.69627	0.82243	0.93791	1.17093	1.70744	1.8884
1.3102	0.94913	0.77628	0.531118		0.704951	0.87169	1.74222	0.86715	0.73448	0.75345	0.6748	1.87055	1.83402	1.04146
1.06584	1.08801	1.06593	0.526926		0.56976	0.51211	1.01886	0.89735	0.8276	1.84426	0.68355	1.53567	1.57394	1.29332
1.29945	1.05933	0.90784	0.631049		0.569792	0.99198	0.64674	0.81613	0.87973	0.88871	0.9066	1.93033	1.58547	1.28979
1.28653	0.92644	0.94915	0.642859		0.77023	0.74039	0.60425	0.99475	0.62135	0.8447	0.82041	1.75	1.76446	1.71925
0.61356	0.9367	1.47626	0.552472		0.639258	0.80544	0.54033	0.86017	0.73828	0.9911	0.92534	1.54489	0.8266	1.17503
0.92893	1.29125	0.73294	0.851732		0.761397	0.62409	0.96834	1.16948	0.80459	0.94654	0.95928	1.6612	1.58265	1.28369
0.95542	1.1346	0.98564	0.56498		0.305565	1.56059	0.85746	0.61092	0.81028	0.86753	0.63894	1.60823	1.49934	1.54807
0.96294	0.77936	1.04878	0.811903		0.862199	0.9812	0.8211	0.83168	1.27018	0.7099	0.82747	1.5188	1.71452	1.38479
1.19942	0.57867	0.96583	0.85429		0.464148	0.83958	1.17154	1.40256	0.86354	0.87863	0.50498	2.01087	1.65712	1.74478
1.09302	0.86812	0.8584	0.684103		1.19462	0.71155	0.74777	0.70381	1.29105	1.71066	1.2597	1.29545	2.02098	1.78355
0.94102	0.7733	0.83549	0.700834		0.8173	0.71569	0.66057	1.03011	0.49987	0.64111	0.74295	1.47128	1.7948	1.80221
1.26127	1.4812	1.1771	0.514502		0.834111	0.88391	0.78525	0.86598	0.87723	0.71083	0.65399	1.78882	1.58955	1.75318
1.25977	0.98358	0.69067	0.564899		0.764426	0.60753	0.9136	0.95799	0.67395	0.882	0.86232	1.34472	0.93719	1.86835
0.85823	0.79467	0.8753	0.363712		0.685481	0.65328	1.74766	1.47325	2.03176	1.76623	0.74755	1.69896	1.23092	1.43926
0.99104	1.10213	1.88557	0.357134		0.541409	0.86485	0.79181	1.0972	0.74736	0.91384	0.7917	1.33946	1.39929	1.69009
0.97093	1.1178	0.86714	0.805149		0.718859	0.70043	1.39801	0.99414	0.93785	0.72482	0.8416	1.46346	1.98157	1.31273
2.6912	0.75911	0.84419	0.757212		1.12279	0.57863	0.78909	0.95188	1.51026	2.04307	0.59383	1.69023	1.53967	1.73079
0.99664	0.83232	0.83465	0.950094		0.576126	0.79966	0.55874	0.88746	2.40377	0.90222	0.9102	1.56264	1.97351	1.38377
0.89411	1.5923	0.86019	0.608753		0.530391	1.52882	0.6979	0.78883	0.76686	0.5845	0.49518	1.80946	1.78441	1.75782
0.46449	0.77253	1.15654	0.696082		0.993831	1.22757	0.85649	0.94318	0.78625	0.68541	0.71296	1.49166	1.16717	1.51998
0.92033	0.64951	0.78611	0.552245		0.740792	0.74549	2.21856	0.71288	1.19219	0.81168	2.2613	1.66956	1.38297	1.68105
1.00487	0.96512	0.84141	0.505357		0.732362	0.75024	0.74042	0.8818	0.80689	0.71141	2.09226	1.74843	1.65321	1.60589
0.77738	2.28594	0.91279	0.807254		0.748932	0.69939	0.66177	0.87445	0.82682	0.52058	1.20772	1.82238	1.84979	1.31381
1.09194	1.06975	0.98656	0.748779		0.488516	0.8808	1.10047	0.93552	0.72467	0.63135	0.71769	1.70024	1.57869	1.45138
1.11244	0.92525	0.81345	0.927354		0.739371	1.07827	0.73582	0.95281	1.6077	0.65928	0.8068	0.97271	1.84884	1.48644
1.77104	0.80232	1.04802	0.534405		0.215138	0.79312	0.86908	1.77431	0.51342	0.80494	0.93307	1.59174	1.79046	1.32196
0.79873	0.68355	0.99192	0.929638		0.677243	0.73313	0.66774	0.79585	0.77977	0.84358	0.78149	1.80877	1.01605	1.30488
1.07985	1.05767	0.90397	0.823818		0.634752	0.61119	0.72512	0.83327	0.80637	0.81395	0.74623	1.76768	1.60767	1.40555
1.26386	0.71208	1.12312	0.435165		0.771857	0.77958	0.7245	0.68265	0.84149	0.85493	0.64484	1.59192	1.8944	1.62397
1.03201	1.19171	1.03506	0.565515		0.462815	0.81463	0.68695	0.71586	0.84665	0.87963	0.7732	1.80952	1.7859	1.52044
0.99108	0.99813	0.8726	0.64636		0.656169	1.08003	0.72245	0.80565	0.56189	0.58786	2.5341	1.77672	1.63334	1.56355
3.2859	0.71601	0.98105	0.765302		0.555052	0.99294	1.15931	0.80613	0.81523	2.23123	0.69328	1.77647	1.66824	1.58867
1.16998	0.45708	1.34145	0.811377		0.631877	0.90136	0.82854	0.97944	0.63798	0.71684	0.80148	1.56617	1.95497	2.06787
0.80099	0.59623	1.05958	0.859854		0.629653	0.59628	0.57242	0.74195	0.698	0.74509	0.52391	1.36863	1.72219	1.59621
1.06683	0.63581	1.11459	0.717778		0.807368	0.53398	0.80407	0.68427	0.5926	0.62888	0.80682	1.61159	0.78134	1.74597
1.15905	0.94672	0.98443	0.469124		0.82911	1.44431	1.02057	0.81344	0.91677	1.56677	1.05855	1.24237	0.77727	1.09924
0.87272	0.86453	1.40408	0.568986		0.789418	0.84928	2.36966	1.47749	0.63586	0.77048	0.97138	1.45743	1.59167	1.62929
1.12567	1.11424	1.21496	0.630124		0.664289	0.96804	1.05235	1.60213	0.71258	0.84858	0.6723	1.82125	1.51559	1.64479
1.01395	0.88088	1.09497	0.940049		0.515589	0.69594	0.6803	0.6342	0.84061	0.88524	0.89619	1.24172	1.4809	1.26314
2.19748	1.95252	0.88629	0.278097		0.909325	0.74664	0.78148	0.64397	3.30123	0.89348	0.82662	1.36599	1.6178	1.23556
1.15776	2.45251	1.18209	0.730806		0.595762	0.86208	0.64424	1.04522	0.67408	1.20613	1.10601	1.10351	1.89259	1.66884
0.86206	2.06806	1.71333	0.595668		0.62005	0.53591	0.85173	1.65522	0.89409	0.84979	0.98087	1.75839	1.37676	1.39491
1.00431	1.07043	1.22854	0.587376		0.538873	1.10081	0.90693	0.90479	0.82852	0.92707	0.71771	1.31645	1.58747	1.02877
1.0438	1.04983	0.84861	0.962647		0.73184	1.99871	0.93913	0.69536	0.83348	0.94532	0.73118	1.39552	1.26159	0.84559
0.82605	0.65851	1.01311	0.750626		0.787291	0.77911	0.67358	0.84112	0.90488	0.91223	0.69474	1.26448	1.70678	1.21507
0.9856	0.78299	1.15773	0.641446		0.862528	0.78916	0.61392	0.63777	0.59338	1.62444	0.53107	1.10516	1.71963	3.16784
0.65948	1.36987	1.87126	0.420797		0.520238	0.89188	0.88335	0.74381	0.51739	0.77611	2.4618	1.34477	1.59575	1.54785
1.02598	1.09936	1.15372	0.739538		0.468375	0.69822	0.66932	0.80918	1.01952	0.87491	0.83668	1.49787	1.08864	1.63211
0.99646	0.83781	1.0472	0.431802		0.667227	0.91792	0.5721	0.65224	1.24768	0.65582	0.78247	1.58705	1.39893	1.43338
1.13204	0.92696	1.30999	0.556492		0.834599	1.1127	0.63973	0.78916	0.72961	0.83319	2.64874	1.61492	1.83833	0.90496
0.94974	1.1179	1.05845	0.699303		0.748406	1.02121	0.80503	0.70781	0.65126	0.8322	0.88764	1.83237	1.81259	2.1298
1.072	1.45218	1.03647	0.850613		0.83748	0.69746	0.92571	1.8347	0.9072	0.46662	1.72724	1.51232	1.64469	1.40345
1.10113	0.95677	1.1028	0.476421		0.698267	0.95526	0.6762	1.08804	0.70883	0.75393	0.98994	1.38949	1.49528	1.75958
0.91272	0.78649	1.26933	0.301304		1.01277	0.96522	0.74658	1.00073	0.7986	0.9275	0.69139	1.52564	1.09879	2.18527
1.09652	1.20426	1.08976	0.69448		0.525776	1.16029	0.78323	0.88105	0.83908	0.73714	0.83393	1.10502	1.47211	1.5898
0.97398	1.2951	0.7975	0.815607		0.694888	0.67563	0.93975	1.82294	0.6238	0.9357	0.73237	1.50663	1.59179	1.43222
1.01213	0.78056	1.04951	0.635427		0.616011	1.35094	0.67835	0.70701	0.63631	0.72777	0.76262	1.90488	1.83958	1.66923
1.18362	0.67847	1.16585	0.481412		0.736269	0.82525	0.75583	0.80575	0.78904	2.24348	0.37633	1.63958	5.71887	1.58219
1.36845	0.91029	1.09491	0.763477		0.79593	0.92251	1.38414	0.85773	0.71339	0.7855	0.76119	1.47623	1.72369	1.73865
0.91684	0.9858	0.95103	0.716149		0.787003	0.56388	0.67493	0.79214	0.79104	0.87224	0.72546	1.20573	1.08217	1.85019
1.06922	1.01792	1.03078	0.678353		0.729556	0.62567	0.74349	0.94504	0.67465	0.91697	0.77169	1.58406	1.40895	1.50102
0.71619	1.00587	1.01168	0.598232		0.474013	2.23591	0.8633	0.79987	0.72889	0.85223	0.75963	1.60859	2.23544	1.30931
1.18514	0.95656	1.07829	0.720122		0.619861	0.8594	0.70077	0.86675	0.84054	0.75263	0.80602	1.65344	1.69767	1.62864
1.35906	0.69783	1.13401	0.632971		0.758599	0.73143	0.55534	0.84206	0.79915	1.82219	0.76811	1.67965	1.73512	1.99561
1.24503	0.94269	0.92302	0.838871		0.779016	0.56739	0.80738	0.95115	2.31335	0.34475	0.88444	1.79646	1.69742	2.38418
1.1645	1.15745	0.68479	0.712044		0.883887	1.19746	0.73675	0.79245	0.6853	0.67694	0.60512	1.59371	1.81666	1.43358
0.89183	2.13171	0.63845	0.69484		0.600023	0.47182	0.73909	0.65841	0.78932	1.96951	0.79743	1.90163	1.61553	1.3357
1.02157	0.58635	1.00286	0.541268		0.86749	0.78783	1.08924	0.96535	0.54481	0.79254	0.7835	0.85118	0.9982	1.71278
2.08949	0.93597	1.0619	1.40019		0.918818	0.7979	0.79994	0.8744	0.83691	0.74303	0.72283	0.43077	1.20568	1.29762
1.01004	0.61214	0.95483	0.834613		0.656085	0.93057	1.14319	0.91201	0.6734	0.84186	1.64969	1.37019	1.94887	1.45696
1.11747	0.9607	0.86447	0.658682		0.413242	0.81428	0.82843	1.63885	1.02814	0.81708	0.72066	1.29045	1.58709	1.62144
0.92658	0.54393	0.70736	0.641182		0.848505	0.92891	0.61913	0.8986	0.95921	0.84187	0.75753	1.00811	1.8062	1.5995
0.5131	0.99067	0.93899	0.607601		0.887028	0.60973	0.83752	0.97619	0.63818	1.06628	1.2916	1.90208	1.55017	1.02357
0.87812	0.67642	0.88217	0.635282		0.781491	0.79619	0.59441	0.88347	0.79462	0.7352	1.55786	1.7269	1.80043	1.87793
1.78942	0.83034	1.00222	0.371075		0.352268	0.66448	0.9511	0.86532	0.94545	0.86053	0.7605	1.87454	0.9789	1.51259
0.87962	0.92542	0.77561	0.51254		0.803879	0.66126	0.8974	0.6902	0.84391	0.92003	0.82851	1.57894	1.6921	1.65401
1.05315	0.96122	1.14255	0.863525		0.686488	0.87437	0.68972	0.89616	0.70423	0.95304	0.72303	1.25707	1.84843	1.59153
0.93806	0.97183	1.04476	0.621715		0.610132	1.68022	1.13641	0.79148	1.02028	0.58715	0.8184	1.31936	1.66535	1.89165
0.75998	0.92316	1.33888	0.759614		0.799992	0.92439	0.73336	1.47838	0.81252	0.61053	2.20959	1.25635	1.7252	1.73553
2.12579	0.94337	0.81101	0.886943		1.21457	0.78348	0.82906	0.86288	2.45373	0.77928	0.77027	1.71906	1.42897	0.77714
0.41038	1.17558	0.88728	0.606369		0.847606	0.62126	0.7581	0.95179	0.60367	0.93794	0.78736	1.12028	1.79323	1.66797
0.71868	0.99703	0.87957	1.18358		0.262362	0.92108	0.60579	1.10488	0.76379	0.73731	1.06682	1.43755	1.30081	1.74461
0.84809	0.84485	0.99366	0.434281		0.466653	0.84686	0.66535	0.53783	0.72274	0.72155	0.65417	1.32863	3.02311	1.98541
1.40319	0.95294	1.17224	0.652782		0.510186	0.89034	0.84941	0.72673	2.51482	0.7005	0.68114	1.34875	0.12479	1.73069
0.87738	0.88872	0.81427	0.671367		0.934734	1.05735	2.30559	0.75814	1.8385	0.99027	0.89761	1.53559	1.76363	1.3643
1.08859	0.93991	0.93006	0.735007		0.612056	0.78343	0.83532	0.8723	0.76771	0.5083	1.07372	1.77108	1.68415	1.04421
0.99395	0.93449	1.09237	0.879506		0.796887	2.32353	0.78115	0.85669	0.6057	0.85302	0.56036	1.57062	1.8281	1.6944
0.97357	1.06514	1.3614	0.332585		0.6718	0.77559	0.77562	0.56048	0.74081	0.86759	0.73515	1.5717	1.14712	1.57453
0.98254	0.89446	1.08637	0.55652		0.86807	0.7086	0.78071	1.0488	0.79837	0.77592	0.83522	1.73381	1.60282	1.6326
1.20181	1.06472	1.19551	0.610293		0.907228	0.65286	0.65325	0.8494	0.47485	0.65244	0.83684	1.66737	1.7633	1.38523
2.70571	0.82607	0.87014	0.532685		0.822898	0.80976	0.54435	0.87327	0.74779	1.01416	0.62335	1.50246	1.52394	1.81176
1.3863	0.73743	0.96125	0.528148		0.480966	0.8811	3.3552	0.75095	0.40929	1.13762	1.71629	1.78822	1.50603	1.7432
0.93828	1.02662	0.72507	0.325868		0.90607	0.48969	1.26954	0.98928	0.53753	0.94708	0.73721	1.70114	1.73772	1.73169
2.34522	1.03849	0.83317	0.705121		0.765342	1.35376	1.03918	1.45541	0.6646	0.80064	0.91662	0.95458	1.65605	1.09211
1.71311	0.61807	1.20847	0.568854		0.977907	0.80676	0.88531	0.96903	0.94701	1.02347	1.07376	1.76339	1.37022	1.65251
0.87742	1.04315	0.84596	0.598471		0.315801	0.80952	0.66394	0.67547	1.0232	0.54206	0.83716	1.28258	1.74078	1.22327
0.74484	1.01089	0.89806	0.64161		0.853989	0.90676	1.48377	0.71983	0.48302	1.44398	1.38561	1.86607	1.75172	1.83065
5.60882	1.12914	0.82234	0.709055		0.680656	1.47433	0.64836	0.70968	2.39879	0.88463	0.65646	1.06261	1.41889	3.14906
1.09489	1.0084	1.07166	0.93238		0.414347	0.70359	1.01681	0.71904	0.76764	0.72272	1.4969	1.71499	1.44647	1.62833
1.22415	1.0613	1.96709	0.664834		0.881234	0.7796	0.78815	0.80898	0.85648	0.80154	0.7656	1.45021	1.81212	1.57432
1.08823	0.85659	1.02398	0.898268		0.538157	0.80351	0.93196	0.84006	0.73512	0.83193	0.67408	1.2917	1.76838	1.25359
1.20152	1.11404	0.81979	0.553818		0.914368	1.68874	0.71666	0.50399	0.65433	2.30778	1.09828	1.6757	1.64272	1.53629
1.73589	0.68594	1.29929	0.639564		0.551703	0.83598	1.06601	1.05813	0.63458	3.54317	0.78606	1.34399	1.56763	1.66311
0.76775	0.96298	2.46538	0.709348		0.753665	1.75096	0.70925	0.78073	0.89393	0.68931	1.01881	1.38722	1.53741	1.12423
1.11867	0.73233	1.0341	0.576182		0.73129	0.89752	0.64079	1.19778	0.86903	0.60686	0.73914	1.63211	1.61924	1.98314
0.4712	1.1295	2.04577	0.555249		0.688284	0.52936	0.5982	0.86809	0.98268	0.84984	0.75908	1.81027	1.72291	2.07744
1.13141	0.98429	1.02777	0.688762		0.451656	0.85728	0.57175	0.85688	0.64553	0.75136	0.55403	1.35326	1.41402	1.30301
0.77694	1.04599	1.15984	0.655274		0.887633	1.94745	0.52732	0.87583	0.60773	0.75936	0.85544	1.10156	1.72514	1.54436
0.96847	3.64125	0.72276	0.588757		0.620589	1.19262	0.75028	0.68625	1.1006	0.89287	0.48478	1.49176	1.48328	1.8023
0.91923	1.43669	0.94378	0.561281		0.774894	0.75442	0.77723	0.60104	0.69828	0.7094	0.73665	1.57994	0.86411	1.76445
1.07359	1.01354	1.18965	0.943812		0.739713	0.7339	0.74649	0.68742	0.88947	0.75078	0.93153	1.5097	2.05917	1.23856
1.36198	2.14687	0.99893	0.500012		0.689526	0.88504	0.6049	1.0996	0.64672	1.03218	0.61677	1.77302	1.69054	1.71219
1.30632	0.7645	0.85993	0.8158		0.84799	0.77607	1.20799	1.3728	0.85087	0.88851	0.70722	0.78291	1.91248	1.74229
1.15075	0.75829	0.95044	0.588504		1.04683	0.79367	0.62861	1.01091	0.85998	0.87508	0.77419	1.64366	1.75342	1.51143
1.02715	1.71836	1.22104	0.852029		0.3313	0.72135	0.69446	0.91082	0.79492	0.557	0.54089	1.60037	1.8288	1.42666
0.80406	0.99647	0.94452	0.682099		0.958336	1.77029	1.03084	0.70279	0.77566	1.26755	0.63855	1.68287	1.84401	0.7218
1.49099	1.02987	0.98035	0.608259		0.568318	0.59021	1.5199	0.86976	0.87087	0.76763	1.05306	1.68977	1.63494	1.97341
0.77556	0.90343	1.17429	0.892515		0.584704	0.8612	0.83969	0.57394	0.8795	1.43676	0.92264	1.71107	5.38834	1.84709
1.00284	0.93411	1.06087	0.626402		0.715784	1.05513	1.91793	2.09608	0.71414	0.60501	1.00322	1.16267	1.77199	0.75417
0.85419	1.35272	1.09461	0.395808		0.553994	0.63388	0.65392	0.95126	0.84498	0.87042	0.76033	1.2194	1.80482	0.95186
1.10959	0.87973	0.78657	0.707856		0.678186	0.8394	0.50146	0.77789	0.63992	0.94385	1.58262	1.70583	1.75483	1.40608
0.83399	1.00758	0.89106	0.709998		0.691312	0.7686	0.8167	1.26077	2.55806	0.70413	0.62302	1.88945	1.5003	1.4829
0.94913	0.91223	0.85208	0.692432		0.776553	1.87457	1.0502	0.99521	0.63898	0.97435	0.70076	1.93066	2.07478	1.73238
2.08823	0.92859	0.80583	0.451567		0.69378	0.94776	0.82914	0.84678	0.68277	1.52566	1.68688	1.72673	1.60982	1.45514
0.70098	0.86897	1.20142	0.31217		0.370769	0.93293	0.77045	0.84659	0.54604	0.78469	0.83227	1.5918	1.48645	1.83794
0.59074	0.97299	1.02674	0.49593		0.685437	0.77309	0.75179	0.90036	0.61621	0.76166	0.81123	1.75406	1.24104	0.7693
0.73567	0.91452	1.01043	0.524312		0.761714	0.73255	0.85757	0.84289	0.68941	0.8454	0.77584	1.71651	1.34698	1.82189
0.93235	0.82748	0.98831	0.717727		0.504441	0.99714	0.68947	0.60018	0.91244	2.53344	1.15984	1.92547	1.66298	1.41157
0.82152	2.29202	1.04899	0.565967		0.639333	1.88268	1.02619	1.06972	0.59089	0.7897	0.71939	1.64273	1.7063	1.69446
1.03565	2.18349	1.08495	1.02078		0.520048	1.13213	0.48661	0.84701	0.80382	0.79266	0.45454	1.47519	1.42764	1.46702
0.77936	1.0609	0.86205	0.390678		0.712459	0.89547	1.44207	0.78193	0.78139	2.50148	0.69636	2.26251	1.51556	1.5713
1.08328	0.73087	1.26922	0.516122		1.02133	1.87356	0.85457	0.72033	0.85314	0.98038	0.82069	1.35907	1.32538	1.60675
1.13737	1.05381	0.94848	0.623502		0.731579	1.03379	0.75248	0.67887	0.59608	0.73723	1.02452	1.56831	1.41338	1.78016
2.41133	0.95011	0.77677	0.617005		0.636734	0.88697	0.76718	0.74271	2.35674	0.7206	0.96155	0.78979	1.55314	1.4411
0.51322	1.02745	1.07702	0.721147		0.563492	0.96041	0.26696	0.44208	0.6028	0.86531	0.93332	1.24763	1.9408	1.15859
0.88916	0.80792	0.9204	0.577631		0.789553	0.72867	0.59129	0.85472	0.6888	0.64546	0.81642	1.82983	1.67481	2.19455
0.98549	0.97532	1.24193	0.768101		0.735601	0.93202	0.85104	0.73751	1.69194	0.7593	1.94946	1.3533	1.76532	1.24959
0.92489	0.98336	1.01806	0.473353		0.7712	0.74587	0.88035	0.98294	0.9436	0.85194	0.8163	1.66203	1.45133	1.43418
1.04235	0.54462	0.87488	0.651821		0.39289	0.70942	0.67873	0.71259	0.81265	0.78063	0.49501	0.81581	1.39131	1.8215
1.16021	0.60407	1.05136	0.652171		0.775513	0.72327	0.64125	0.86528	0.95818	2.31402	0.7783	1.1607	1.84174	1.54879
1.75823	0.58149	0.85134	0.74148		0.373881	0.58629	0.84836	0.83265	0.76893	0.73013	0.76996	1.87046	1.39104	1.41512
1.09401	0.96581	0.98713	0.537087		0.743079	0.89613	0.87139	0.84621	1.8546	0.42753	0.60631	1.51489	1.75036	1.65721
0.85071	0.92712	1.13565	0.555036		0.791322	0.71017	0.95157	0.77976	0.66092	0.76636	0.74279	1.49672	1.63085	1.92707
1.2496	0.97478	0.76459	0.794659		0.895372	0.66589	1.37732	0.61719	0.95035	1.0144	0.87928	1.52587	1.61849	1.0771
1.47716	0.85142	1.26216	0.873384		0.878991	0.78155	0.78253	0.54418	0.80266	0.72509	0.51033	1.34346	1.35337	1.71839
1.90415	1.10033	1.09599	0.907318		0.813035	0.76877	0.9006	0.72384	0.87346	0.57573	0.963	1.55087	1.56543	1.73925
4.53111	1.28798	1.36286	0.736457		0.621943	0.41297	1.0885	0.88165	0.85688	0.71574	0.91984	1.47255	1.45008	6.45705
1.08714	0.68721	1.04617	0.458389		0.769025	0.63373	1.0844	0.81125	0.88085	0.72519	1.96982	1.80228	1.73135	1.8244
1.08094	0.90064	0.62117	0.376433		0.627908	0.6763	0.60294	0.60776	0.88419	1.17626	0.98586	1.10478	1.97437	1.79995
2.42141	1.11555	0.89916	0.694311		0.784748	0.77218	0.77194	0.79514	0.71433	0.70227	0.55967	1.63513	1.572	1.53348
0.92762	0.7885	0.98456	1.53125		0.523814	1.00841	0.78302	1.18966	1.24302	0.7112	0.54822	1.28015	1.23256	1.66313
1.15929	1.90813	1.18491	0.585953		0.794842	0.95431	0.7951	0.74008	0.64605	0.74951	0.82353	1.63237	1.56678	1.63669
2.56441	1.88981	1.31777	0.954788		0.691477	0.9851	1.27031	0.80534	0.91274	0.59735	0.69546	0.96051	1.57119	1.61204
1.01804	0.89913	0.92686	0.580312		0.685518	0.7896	1.00334	0.70037	0.64364	0.88797	0.73703	1.41089	1.5505	1.86082
1.07375	1.31741	0.50514	0.595374		0.929496	1.81322	0.58124	1.13824	0.65296	0.79741	0.72258	1.88421	1.84452	1.51768
1.14399	0.39151	1.16147	0.502669		0.66686	0.99698	0.71686	0.93126	0.88103	0.51248	1.63936	1.55103	1.74477	1.26636
0.97897	0.91296	1.05784	0.488378		0.745562	0.71325	0.8678	1.07767	0.7813	0.74981	0.51998	1.64589	1.32656	1.72082
0.92614	0.76434	0.90535	0.599975		0.564616	0.91457	0.61929	0.88717	0.37189	0.73797	0.71766	1.49022	1.54415	1.57865
1.33507	0.98264	1.20649	0.406599		0.59132	0.5758	0.86053	0.65076	2.16313	0.88287	0.74162	1.56188	1.56129	1.61008
0.94419	1.00673	0.79254	0.806486		0.899764	0.8153	0.98779	1.34967	0.46661	0.66823	0.72203	1.93132	1.7068	1.6284
0.85052	0.94583	1.17215	0.636804		0.676044	1.02137	0.88126	0.72518	0.9027	0.82796	0.77341	1.38565	1.63941	1.55629
1.23305	0.90902	0.86423	0.571345		0.582371	0.82229	0.77362	0.78418	1.26019	0.85544	0.80883	1.88095	1.57804	1.70864
0.92818	0.91294	1.58183	0.554922		0.453255	1.9231	1.55371	0.71994	0.69822	0.64283	1.06726	1.89146	1.35517	1.33487
0.79349	0.9638	1.19797	0.619865		0.514155	0.74966	0.63091	0.75268	0.65821	0.87056	0.68869	1.42842	1.23872	1.5548
0.88039	1.83813	0.69089	0.526209		0.719273	0.8469	0.61635	0.67258	0.33159	0.78819	0.5136	1.71927	1.7061	1.76906
1.17045	0.63023	0.83769	0.647519		0.429887	0.83317	1.24679	0.99274	0.67908	0.7323	0.6315	1.27042	1.59649	1.73512
0.78034	1.08895	0.65249	0.799903		0.570335	0.99585	0.7908	0.90443	0.72891	0.79088	0.94543	1.71567	1.4912	1.14806
1.20398	1.14311	0.97886	0.666187		0.699737	1.10552	0.89586	0.8779	1.97395	1.50568	0.92531	2.00428	0.68668	1.60024
1.40475	0.85487	1.29686	0.786923		0.865268	0.8432	0.81571	0.87223	0.82073	0.93502	0.91339	1.89673	1.80947	1.55459
0.91503	0.84633	0.87591	1.70677		0.69387	0.93957	0.8825	0.7588	0.64326	0.97514	0.50553	1.84287	2.04338	1.78933
1.04397	1.00212	1.01679	1.08906		0.788215	0.69972	0.52832	0.83959	0.75187	1.00798	0.99313	1.44523	2.00669	1.38733
1.23464	0.67472	1.18316	0.546673		0.796508	0.74271	0.85669	0.81029	0.78481	0.5863	0.85902	1.26304	0.95834	1.48761
0.67854	0.8683	0.98829	0.922243		0.360715	0.7242	0.99386	0.82912	0.55036	0.73364	1.68041	1.47154	1.38218	1.27886
1.09598	2.15532	0.98297	0.487792		0.675254	0.84476	1.15572	0.9628	0.66886	0.68525	2.63757	1.7693	1.81738	1.1564
1.06546	0.7622	1.31561	0.716013		0.752155	1.09962	0.75772	0.93605	0.6794	1.14988	0.48968	1.79268	1.28614	1.92958
1.02595	1.13271	1.04202	0.521847		0.724837	1.40421	0.87142	0.79076	0.70685	0.85373	2.73657	1.66894	1.87058	1.71814
1.20546	4.75377	0.70365	1.54472		0.551003	0.71886	0.7156	0.91178	0.68037	0.56076	0.58925	1.48544	1.42618	1.97278
1.04307	0.98618	0.97266	0.529895		1.42248	0.9978	0.78167	0.99921	1.15541	1.04948	0.8561	1.97889	1.69411	1.51824
1.24205	1.03186	1.00335	0.556569		0.659766	0.84162	0.70481	0.95048	1.36141	0.79794	0.7468	1.35184	1.99725	1.14866
1.08753	0.90032	0.99464	0.714437		0.413479	0.63405	0.99115	0.95472	0.5422	0.57004	0.68875	1.3621	1.432	1.60502
1.05069	0.82346	1.4851	0.528292		0.588886	0.75173	0.72448	1.1635	0.75396	0.67723	0.82088	1.72543	1.35979	1.18367
1.01521	0.93517	1.11494	0.502124		0.901005	0.77142	0.70512	0.9303	0.93501	0.64781	0.81744	1.4706	1.66391	1.66947
1.14961	0.78383	0.96056	0.675091		0.227197	0.69662	0.81743	0.85791	0.82076	0.76633	0.84127	1.67501	1.7693	2.32227
1.17114	1.01539	0.86234	0.83507		1.02661	0.89927	0.97408	0.94535	0.68212	0.65999	0.55001	1.21226	1.88067	1.80965
1.17845	0.90222	0.89913	0.653208		0.427109	0.63455	0.91195	0.18832	0.75026	0.79033	0.69715	1.50246	1.53782	0.86901
2.22607	0.99061	1.06678	0.543591		0.59783	0.74381	0.6942	1.04036	0.92606	0.78464	0.60659	1.1838	1.90245	1.76225
0.96332	0.99445	0.79726	0.392558		0.848653	1.38948	0.53399	0.85643	0.80306	0.96017	0.8315	1.42282	1.7983	1.45979
0.88772	1.57539	0.89079	1.08525		0.557717	0.98737	0.90432	0.83	0.66369	0.59255	0.83292	1.71915	1.44003	4.71388
0.94921	1.77936	0.93869	0.83347		0.582659	0.70782	0.89145	0.7247	0.68494	0.87728	0.78683	1.2241	1.64795	1.57583
1.01262	1.00771	1.00163	0.679021		0.720513	0.55279	0.93834	0.64134	0.84158	0.92881	0.76122	1.66498	0.91114	1.50968
0.99013	0.99028	0.83326	0.726782		0.611383	0.76668	0.73799	0.84994	0.76506	0.71938	0.61314	1.46209	1.68511	1.84887
0.80963	1.02898	0.87125	0.720023		0.804167	0.91257	0.75615	0.68483	0.7408	0.52585	0.66173	1.65395	1.91917	1.21736
1.30464	1.09086	0.80762	0.666261		0.879289	0.90293	0.6891	0.71591	1.0112	0.77443	2.33741	1.71844	1.3532	1.52588
0.63654	0.57461	2.10218	0.314844		0.714217	0.71841	0.82983	0.80421	0.76716	0.74791	0.6643	1.7378	1.30571	1.7848
1.2077	1.12772	1.18338	0.956994		0.701322	0.79505	0.76199	0.87732	0.5692	0.41604	0.66768	1.71572	1.78224	1.40184
1.02586	1.04146	0.98629	0.618047		0.671217	0.51154	0.50943	0.80256	1.19265	1.15592	0.89021	1.61659	1.90287	1.15619
0.99419	0.97386	1.04776	0.371109		0.767555	0.85662	1.60984	0.72352	0.94905	2.45997	0.81182	1.51821	1.76768	1.50399
0.85096	0.54753	1.30401	0.686836		0.763877	0.67734	0.84693	0.8317	0.94607	2.29471	0.74849	1.29367	1.12115	1.08394
0.83518	1.20856	0.9423	0.85012		0.720389	0.56201	0.8555	0.81852	0.82799	1.21733	0.95587	1.34771	1.66905	2.73001
1.0818	1.2139	1.08099	3.30698		0.816981	0.87419	0.9326	0.94051	0.65917	0.90221	0.87636	1.06268	1.48483	1.23279
1.29791	1.16103	1.05833	0.443616		0.657696	0.88727	0.736	0.73161	0.83781	0.64948	0.98857	1.64395	1.4784	1.83484
0.94911	1.00294	0.98877	0.937589		0.708784	0.98126	0.92265	0.63041	0.95886	2.19803	0.94212	1.44158	0.5557	1.63253
1.18831	1.09564	0.88948	0.724583		0.735097	0.7166	0.86018	0.76797	0.86852	0.64206	0.96787	1.65893	1.61094	1.86135
0.77546	2.02478	0.99151	0.52048		0.652586	1.00819	0.91424	0.37989	2.89694	1.03281	0.68115	1.42237	1.68549	1.67329
0.5971	1.36784	1.16027	0.561717		0.587323	2.33597	0.69111	1.35241	1.45854	0.58279	0.83487	1.75783	1.63774	1.33073
1.30253	0.6676	0.94761	0.696011		0.763306	1.23204	0.63055	0.86201	0.65706	2.17947	0.95289	1.58741	1.67291	1.40304
1.19149	0.70715	0.91883	0.736094		0.747058	0.78564	1.09352	1.24942	0.91489	0.64935	0.89844	1.90332	1.65094	1.04688
1.20791	0.89813	0.9782	0.553154		0.706642	0.97539	0.89534	1.49238	0.82332	0.77405	0.71729	1.77414	1.64831	1.81587
1.1044	1.14768	0.88742	0.519699		0.672972	0.83182	0.84481	0.77873	0.69795	0.89722	0.95076	1.57711	1.60744	1.86902
1.33	0.89568	0.87185	1.10321		0.427235	0.83329	0.74557	0.80453	1.18574	0.82991	0.96681	0.88649	1.53863	1.55469
1.02349	1.01489	1.06523	0.58445		0.528035	0.72734	0.84644	1.16365	0.86496	0.86136	2.33517	1.95453	1.4927	1.59112
0.79838	0.84859	1.1275	0.157794		0.631288	0.89008	0.74439	1.11301	0.95118	1.10734	1.03521	1.58717	2.3286	1.51726
1.14365	0.93585	1.01084	0.530053		0.178993	0.75821	0.7898	0.90562	0.73758	0.66147	0.72607	2.02707	1.16205	1.71902
0.78033	0.75226	1.02859	0.694394		0.608463	0.56116	0.87172	0.87706	0.73147	0.76121	0.8387	1.5892	1.36193	1.55738
1.00181	2.53899	1.83791	0.456481		0.472297	0.70675	0.69637	0.98999	2.05766	0.68536	1.01274	1.51458	1.65891	1.64288
1.26146	0.8241	1.06589	0.600249		0.473912	0.85476	0.99685	0.50934	5.446	0.77487	0.88746	1.62812	1.66432	1.70586
1.7457	0.71779	0.63501	0.551106		0.566903	1.04229	0.86342	0.78309	0.75609	1.00478	0.64555	1.77965	1.93497	1.7379
1.11123	1.4697	0.85006	0.660657		0.681031	0.80711	0.84686	1.28828	0.98522	1.35461	0.86478	1.63699	1.13279	2.26273
1.0307	0.90988	1.54071	0.492102		1.11793	0.83486	0.48032	0.8279	0.91422	0.58934	1.27845	1.68046	0.96038	1.40243
1.18441	1.14221	0.99732	0.769593		0.830603	0.81557	0.75841	0.5975	0.45975	1.44592	1.00839	1.50608	1.43492	1.5253
1.03212	0.91648	1.30704	0.602207		0.843874	0.89483	1.88151	0.87967	0.671	0.85554	0.64967	1.47867	1.53732	1.28738
0.94012	0.84774	0.37457	0.595828		0.680901	0.66616	1.30003	0.81474	1.96145	0.8556	0.85437	1.62696	1.63364	1.5053
1.02242	1.0571	0.9628	1.27072		0.658495	0.85138	1.04799	1.98242	0.54136	0.84325	0.7766	1.65455	1.64439	1.31433
1.09532	0.83429	1.01238	1.58296		0.509953	0.85576	1.91294	0.73522	2.21292	0.92054	0.92007	1.74899	1.61251	1.72466
1.05476	1.0211	1.09931	0.807687		0.790137	0.61944	1.09879	0.71329	0.57095	0.86864	0.38378	1.57704	1.48204	1.51068
0.91188	1.08813	1.1038	0.479652		0.62169	0.82609	1.17934	0.78917	0.59451	0.93064	0.71212	1.37369	1.9372	1.22339
1.89966	0.68852	1.30602	0.912507		0.55683	0.81411	0.81463	1.20602	3.25987	0.64289	0.63246	1.40751	1.74304	1.29237
0.49475	1.15893	1.04926	0.704574		0.707378	1.43813	0.76124	0.96138	0.79011	1.31004	0.64584	0.66556	1.19488	1.57628
0.71143	2.07132	1.24855	0.400479		0.737913	0.62597	0.58249	0.67425	0.80599	0.90144	2.04902	1.62399	1.63462	1.27917
1.98928	0.89784	0.82573	0.701139		0.935041	1.34931	0.78246	1.01687	0.76866	0.65326	1.94211	1.54966	1.40048	1.43095
1.41398	1.70308	0.92339	0.84502		0.594136	0.85049	0.98531	0.90169	0.47113	0.8987	0.80229	0.99171	1.71849	1.7018
1.76183	0.70671	0.95611	0.52785		0.67578	0.90792	0.93924	0.61774	0.70248	0.88351	0.91075	1.45102	1.18252	1.31779
0.9119	1.11898	0.95564	0.502474		0.629625	1.10655	0.7299	1.10627	0.79362	0.99885	2.13283	1.23086	1.07354	1.74707
1.07515	1.03402	1.65765	0.482959		0.834055	1.5049	1.79021	0.75023	0.88139	0.91703	0.88497	1.71661	1.21331	3.57761
1.00559	1.02953	0.90981	0.788424		0.820888	0.89901	0.66691	0.71916	1.01102	0.77576	0.69785	1.64569	1.84533	1.64755
1.04254	0.93437	2.86713	1.04588		0.672063	0.93434	0.795	0.53414	0.80168	0.83926	0.5299	1.38226	1.65709	1.72201
1.05288	0.89621	0.97916	0.670584		0.789149	0.85144	0.50668	0.92578	0.66727	1.17873	0.8281	1.3554	1.60715	1.60059
1.06924	1.99156	1.00384	0.610773		0.586992	1.20283	0.85252	0.75594	0.64244	0.88635	0.84222	1.79224	1.18678	1.7879
1.10049	1.19813	0.80878	0.624168		0.245728	0.82119	0.82453	0.76264	0.77233	0.90648	0.73592	1.58699	1.12882	1.57289
0.67608	2.32347	0.80945	0.674601		0.549428	0.54432	0.75957	0.82761	0.95199	0.81492	0.73511	1.79256	1.52896	1.5611
0.95525	0.83596	1.07245	0.727639		1.0402	0.71726	0.56152	0.88324	0.72391	1.11726	1.27833	1.42174	1.32979	1.55017
1.06671	0.90455	0.96601	0.33199		0.71266	0.2887	0.64692	0.95215	0.80369	0.59821	0.85473	1.40213	1.53916	1.70261
1.7514	1.18103	0.86168	0.398786		0.654361	0.7671	0.53212	0.70728	1.28646	0.80098	0.62928	1.45871	1.50163	1.67747
1.08703	1.04919	0.99226	0.650946		0.746867	0.92202	0.88276	0.83893	0.78039	0.62135	1.12308	1.39627	1.7037	1.84267
0.92895	0.82358	1.29739	0.740062		0.522731	0.96633	0.63465	0.58292	0.82311	0.89276	0.79988	1.47259	1.133	0.66881
1.13251	1.01846	2.00463	0.66022		0.523291	1.17534	0.88929	0.76959	0.65869	0.71941	0.48097	1.24283	1.80768	1.82207
1.17928	0.67902	0.91843	0.413868		0.798916	1.0261	0.81153	0.70272	0.99103	0.83943	0.92527	1.51305	1.91176	1.22119
1.11613	0.96909	0.97801	0.988091		0.725085	0.53102	0.99308	0.74039	0.72838	0.64333	0.87216	1.61246	0.86008	1.15683
0.93183	0.7124	0.9831	1.01386		0.674888	0.82451	1.08017	0.81937	0.67762	0.85355	0.79524	1.09936	1.10703	1.92914
1.20369	0.92058	0.91962	0.428902		0.682	0.69762	0.703	0.66506	0.69112	2.08175	0.90658	1.33035	2.7742	1.52162
1.18021	1.06313	0.90218	0.71429		0.824726	0.86609	0.45535	1.16476	0.50394	0.93311	0.83379	1.67619	1.73683	1.05475
1.19043	1.54805	0.96699	0.783322		0.385278	0.95077	0.62453	0.5491	1.34898	0.71172	0.87597	1.69207	1.79295	1.5384
0.87273	1.05528	0.98439	0.640018		0.656768	0.9034	0.81313	0.96347	0.65436	1.0398	0.62614	1.64684	1.8614	1.63862
1.04485	1.07303	1.67706	0.839547		0.920368	0.66646	0.68069	0.71764	0.75173	0.60158	0.63875	1.67221	1.67416	1.80285
1.12955	1.35916	1.6691	0.4455		0.65136	0.96636	0.93135	0.82596	0.83695	0.78101	0.68489	1.49651	1.16526	1.74823
1.44732	0.77259	1.1297	0.549548		0.721834	0.803	1.03376	0.8748	1.4005	0.49475	0.73554	1.53999	1.50447	1.46111
1.11023	0.97917	1.78734	1.30039		0.388941	0.82637	1.12391	0.92487	1.80311	0.57894	0.6788	1.94932	1.3502	1.54579
1.22309	0.87228	1.17093	0.779504		0.567713	0.85392	0.89812	0.64642	0.61636	0.56005	0.71156	1.6207	1.59251	1.18424
1.11507	1.03922	0.65386	0.40103		0.785482	1.05914	0.72664	0.97734	0.84872	0.905	0.92212	1.7375	1.72574	1.68718
1.2811	1.08051	0.59129	0.438624		0.736218	0.65902	1.10286	0.84342	0.85207	0.73092	0.54609	0.7553	1.09207	2.0737
1.08172	0.62201	0.9524	0.860379		0.92876	0.81617	0.75987	0.86254	0.83825	0.86479	0.92657	1.67077	1.36474	1.73749
0.76756	0.69655	0.55296	0.743786		0.822267	0.75288	0.543	0.69301	0.82152	0.69881	0.42679	1.48203	1.4747	1.67601
1.19279	1.41035	0.77391	0.554542		0.729272	0.87025	1.39996	0.75157	0.71393	0.80876	0.93518	1.7634	1.74192	1.59271
0.94116	1.6743	0.98168	0.55453		0.467989	0.78254	2.25438	0.81867	0.81418	0.9738	1.28951	2.32189	1.31495	1.68877
1.29073	0.95838	0.71493	0.776407		0.397388	0.7118	0.70703	0.86122	0.74972	0.78116	0.68407	1.6353	1.25828	1.43268
2.66775	0.99958	1.26095	0.8395		0.515005	0.86923	0.88717	1.03497	0.67385	0.86486	0.67806	1.25019	1.90689	1.8047
0.9898	1.69757	1.07865	0.438807		0.820996	0.90234	1.22752	0.89731	0.72593	0.77921	2.05446	1.43928	1.56087	1.93448
1.89209	0.8224	1.06282	0.3852		0.422979	0.91085	0.57733	1.00186	0.74191	0.82748	0.78292	1.72995	1.68288	1.70188
0.75663	0.9106	1.02337	0.388964		0.731525	1.20408	0.62647	0.83493	0.90968	0.80961	0.81293	1.4278	1.4644	1.69405
1.08655	1.19215	0.66149	0.542684		0.718493	0.78645	1.36479	0.90706	0.68543	0.91203	0.84395	1.42868	1.79235	1.53566
1.15662	1.05535	1.01601	1.21709		0.68534	0.87879	0.66543	0.71743	0.71163	2.28261	0.98315	1.50224	1.473	1.74509
1.17064	1.20067	0.85172	0.503891		0.601013	0.91786	0.84134	0.74026	0.47537	0.70014	0.75418	1.6102	1.88678	2.14556
1.14935	0.87624	0.88667	0.785953		0.904584	0.74352	0.91668	0.64442	0.63369	1.09883	0.55326	1.63193	1.16102	1.67917
0.86617	1.35872	1.37622	0.687707		0.621809	0.78486	0.78363	0.79372	1.20475	1.28016	0.83462	1.64359	1.50186	1.53713
1.21018	1.18434	1.56772	0.614903		0.449705	1.48427	0.8015	0.90965	0.82413	0.82882	1.86847	1.65966	2.15798	1.48733
1.14743	1.06813	1.08898	0.610175		0.61756	0.4952	1.23679	0.7774	0.55274	1.92982	0.71588	1.19085	1.54612	1.8141
0.92186	1.60652	0.96546	0.83154		0.885205	0.777	0.85772	0.85896	0.74721	0.67394	0.81426	0.69598	1.86017	1.92026
0.98461	1.10641	1.25928	0.80193		0.796248	0.99402	0.85834	1.32709	0.78931	0.92621	0.63643	1.81409	1.39877	1.60565
1.20502	0.96841	1.03243	1.08568		1.02896	0.59946	0.65227	0.87917	0.87367	0.85209	0.71974	1.64814	1.37479	1.80621
0.97505	0.94672	1.03985	0.802883		0.502074	1.02176	0.69019	0.80814	0.88622	1.37783	1.32055	1.11223	1.76516	1.65225
0.97433	0.85298	0.82765	0.704823		0.611414	0.86218	0.93025	0.81159	0.52141	0.75349	0.88969	1.901	1.67091	1.68731
1.29127	1.01879	0.95104	0.403161		0.530153	0.77544	0.7277	0.5591	1.81439	0.73076	0.63953	1.32172	1.98014	1.10633
0.77223	1.09364	0.76231	0.447106		0.757216	0.8054	0.92933	1.0328	1.01068	0.94236	0.77115	1.46014	1.04256	0.97936
1.40971	1.28207	1.1302	0.462736		0.580682	0.70537	0.63182	0.66567	0.70661	0.7842	0.70841	0.32913	1.6349	1.62207
0.89927	1.07978	0.82055	0.714744		0.879485	0.92096	0.93712	0.77336	0.76095	0.61918	0.7426	1.92836	1.25804	1.72563
0.93678	1.16256	0.94727	0.517007		0.910954	0.64954	0.81456	0.87821	0.45447	0.78281	0.80619	1.64858	1.72056	1.53977
1.29964	0.93087	0.96843	0.883069		0.86691	1.28819	0.61626	0.8814	0.77094	0.69915	0.96541	1.61757	1.64202	1.79184
0.94249	1.11639	0.7769	0.60184		1.21645	0.83467	0.74827	0.63095	0.68834	0.6106	0.80606	1.5117	1.86269	1.74485
1.19548	0.94948	1.68653	0.647475		0.4831	0.52866	0.82427	1.10813	0.71488	0.88816	0.85242	1.64099	1.70552	1.48232
0.61554	2.76508	0.79822	0.329843		0.914843	0.73915	0.86646	0.92642	0.61723	0.84574	0.83807	1.70564	1.40774	1.7866
2.64055	0.91889	1.18532	0.45843		0.542009	0.93348	0.88055	0.95781	0.39436	0.87556	1.18437	1.61006	1.91129	1.92408
1.01418	1.03104	1.00918	1.63751		0.623397	0.85688	1.08497	1.15712	0.75776	0.91256	0.76007	0.30895	1.43209	1.68011
1.00808	0.81639	1.10159	0.549829		0.759832	0.74486	1.23275	1.15055	0.91712	0.72134	0.79054	2.02855	1.35338	2.24368
1.13147	0.9097	0.88161	0.695861		0.738658	0.46009	0.95204	1.02585	1.29626	0.79454	0.67164	1.67163	1.38009	1.50919
0.72726	2.78975	0.95198	0.907497		0.625889	0.77207	0.63098	0.64625	0.73249	0.4795	0.89674	1.28709	1.75146	1.75194
1.07089	1.15795	0.90611	0.546418		0.331792	0.72858	0.70005	1.25667	1.9284	0.76194	2.14908	2.14962	1.59106	1.39101
0.81053	0.85587	0.97905	0.274311		1.03015	1.55543	0.5902	0.72381	0.53578	0.7913	0.70471	1.87396	1.74529	1.22145
1.00844	0.92957	1.17616	0.420719		0.645817	0.71043	1.85719	1.01375	0.83164	0.6381	0.92402	1.78201	1.62204	1.52983
1.00722	2.69763	0.91719	0.61813		0.7855	0.76636	0.87423	0.81362	0.99094	0.99224	0.88387	1.20965	1.67746	1.65062
0.87241	0.69005	1.0251	0.770413		0.501605	0.67751	1.26163	0.57807	0.79114	0.93364	0.88739	2.01108	1.34932	1.44914
0.9414	0.86478	0.74211	0.806174		0.937012	0.9485	0.71315	0.77963	0.73689	0.81548	0.80343	1.74066	1.77936	1.77849
1.08176	0.64976	0.75203	0.580167		0.587761	0.92209	0.93268	0.90761	0.89112	0.6827	2.14869	1.27459	1.80241	1.87197
2.55806	0.82136	0.96988	0.440809		0.604059	0.88345	0.74429	0.94656	0.79098	0.74273	0.78728	1.33254	1.54332	1.51107
1.02328	1.12043	1.07658	0.591982		0.557528	0.91203	0.89198	0.6368	0.94234	1.01345	1.51801	1.34724	1.7363	1.75688
1.15551	2.03456	0.93452	0.717659		0.77831	1.78522	1.0468	0.91108	0.819	0.99428	0.58163	1.42448	1.75611	1.95768
0.84901	1.07128	0.88275	0.382098		0.10806	1.10514	0.79205	1.00093	0.8975	1.91568	0.75955	1.71075	1.73089	2.0914
0.88606	1.16093	0.89575	0.614982		0.554729	0.611	0.75024	0.87366	1.03602	0.5617	1.87405	2.60362	1.44394	1.97574
0.84131	0.66646	0.81938	0.587678		0.763447	0.90495	0.841	1.17215	0.71289	1.08961	0.78726	1.11036	1.5727	1.8048
1.04827	1.2721	1.06936	0.468097		0.771627	0.59764	1.00924	0.80251	0.49828	0.55029	2.01374	1.54548	1.34152	1.41482
0.87844	0.90313	1.64156	0.700142		0.549661	0.64995	1.04517	1.05749	0.46835	0.96101	0.75328	2.24314	1.5817	1.29147
1.20011	0.9435	1.21261	0.413642		0.704599	0.63861	0.71113	0.5661	1.5788	2.48271	0.8919	1.52241	1.64386	1.73108
0.90803	0.84277	0.98524	0.685904		0.63116	0.84981	1.41785	0.76421	0.58009	0.75327	0.93011	1.44826	1.85049	1.5355
2.60668	0.95281	0.80961	0.666772		0.813306	0.79493	0.85013	1.42029	0.62814	0.75404	0.92911	1.33547	1.45314	1.25244
0.99596	1.23777	0.77319	0.693628		0.662127	0.91591	0.91456	0.65848	0.72416	1.01024	0.71732	1.36679	1.29045	1.77493
1.05167	1.59913	1.11711	0.690757		0.387178	0.60226	0.75003	0.64307	0.82642	1.27804	0.86499	1.47531	1.55229	1.62718
1.75881	1.0132	0.87546	0.942578		0.853498	0.49886	0.66209	0.61228	0.68554	0.59909	0.56622	1.39088	1.74784	1.28009
0.94027	2.45952	1.03923	0.653762		0.664346	0.69114	0.8054	0.6659	1.05716	0.90823	1.58096	1.6991	1.77	1.74192
0.95505	1.59269	0.98685	0.651201		0.449002	0.87268	0.91372	0.79673	0.95881	0.75991	0.91825	1.03308	1.7744	1.64995
1.07026	0.85301	0.92646	0.631129		0.475603	0.67291	0.95411	0.96283	0.68048	0.69151	0.90093	1.27626	1.60129	1.38959
1.76816	1.01439	0.88545	0.427051		0.776552	2.35814	0.59508	0.87008	0.79982	0.91742	2.12903	1.86283	1.18696	1.90977
0.92778	1.04015	0.7412	1.3372		0.271081	2.02669	0.75612	0.92601	0.60423	0.79536	0.85145	1.66594	1.43021	1.80788
1.0364	1.67924	0.88494	0.640881		0.637936	0.75779	0.76336	0.67698	0.85194	0.84296	0.79639	1.93921	1.41805	1.5787
1.03136	0.7471	1.13521	0.908707		0.525605	1.06406	1.5119	0.67736	0.53876	0.59489	0.61506	1.65329	1.41716	1.18781
0.98725	1.20639	1.162	0.623242		0.923184	0.59953	0.6201	0.92234	0.84645	0.95237	1.04532	1.66212	1.64132	1.29918
1.08948	2.47309	0.34918	0.222664		0.606415	0.74613	0.91042	0.74394	0.70185	0.76065	0.90434	1.79102	2.12509	1.44249
0.99769	1.47126	1.01034	0.797409		0.602219	0.75816	0.65581	0.98761	0.81177	0.85742	0.5064	1.96594	1.76211	1.57356
1.56019	0.93059	1.71927	0.738486		0.882247	0.7747	0.38956	0.75834	1.42165	0.88695	0.85636	1.72438	1.68494	1.78078
0.62125	1.03438	1.04647	0.492316		0.546217	0.83821	0.66346	1.14199	0.75732	0.67347	0.84998	1.51082	1.60116	1.67455
1.08409	0.74017	0.96802	0.473822		0.702485	0.87624	0.75878	0.9639	0.96353	0.64547	0.95937	1.25644	1.31267	1.91439
0.55535	0.7235	1.04035	0.551549		0.62747	0.71907	0.68409	0.85584	0.87923	1.15743	0.63518	1.46146	1.11289	1.71585
1.13298	0.8737	0.78685	0.679618		0.575172	1.0827	0.82265	0.82061	1.57723	1.45624	0.61514	1.41843	1.34732	2.24526
0.99141	1.00379	1.04118	0.655285		0.640205	0.81432	0.90565	0.73156	0.86036	1.19041	0.7473	1.08202	1.74943	1.80712
1.19908	1.14599	0.82866	0.739216		0.695368	1.12867	0.68532	1.09605	0.67417	0.95059	0.69361	1.49878	1.64821	1.46006
0.65668	0.87708	1.16592	0.735984		0.716998	0.77269	0.76755	0.82677	0.67873	0.71654	0.6648	1.69374	1.66368	1.76159
0.76115	1.00674	1.27788	0.705129		1.52592	0.73437	0.66663	0.5611	0.73098	1.01716	0.73804	1.87915	1.93717	1.50501
1.12218	0.99712	1.01231	0.581482		0.884505	0.81261	0.79747	0.79619	0.44853	0.8435	0.6762	1.5914	1.68889	1.74866
0.97044	0.94231	0.92018	0.309604		0.767455	0.87257	0.74095	1.24748	0.86535	0.38918	0.74605	1.08623	1.15923	1.72692
0.86921	1.03048	1.4534	0.734842		0.821186	0.80158	0.6927	1.04281	0.75661	0.98606	0.71336	1.61685	1.60858	1.77123
1.00216	0.79135	0.94918	0.614033		0.714798	0.81085	1.38336	0.74164	0.83422	0.8914	0.94945	1.57739	1.63217	1.65361
1.12668	0.97655	0.75458	0.64435		0.578108	1.40498	0.83583	0.73891	0.81059	1.03246	0.58078	1.27809	1.14376	1.81635
1.08055	0.74235	0.96877	0.402728		1.76086	0.6011	0.75905	1.05976	0.80805	2.10707	0.77336	1.8789	1.69758	1.72579
1.17657	1.59628	0.90702	0.327513		0.806965	0.53115	0.92005	1.00869	0.77698	0.89871	0.70499	1.67626	1.34824	1.13579
1.18123	0.96391	0.80037	0.395826		0.575764	0.85733	0.74483	0.84824	0.77565	0.88409	1.07912	1.72105	1.14452	1.93936
0.80857	0.8912	1.02804	0.705675		0.772696	0.88856	0.83582	0.67522	2.21564	0.92914	0.74257	1.43222	1.40434	1.49318
1.30732	1.10357	1.74614	0.583701		0.691411	0.86707	1.96901	0.77518	0.77807	0.54399	0.56947	1.41871	1.31944	1.68271
1.07009	0.82423	0.91366	0.333031		0.550319	0.7094	0.80832	1.05223	0.63919	0.81171	1.81008	1.63908	1.83539	1.75534
1.07993	0.81634	1.04473	0.540645		0.531699	0.85981	0.49796	0.59467	0.8913	0.93358	1.83044	1.88786	1.8229	1.44043
0.86968	1.10554	1.53274	0.398464		0.663923	0.94106	1.55367	0.72107	0.65936	0.5187	0.71891	1.75443	1.48275	1.73464
0.97336	1.21812	1.14886	0.889296		1.01017	0.82141	1.08753	1.0965	0.72708	0.773	0.80778	2.13638	1.58247	1.33999
1.00246	1.0362	1.11378	0.623883		0.375102	0.98529	0.54095	0.76131	0.94498	0.67065	0.8374	1.5452	1.19537	0.8369
1.19997	0.96964	1.0855	1.11874		1.02881	1.06227	2.07266	0.77194	0.77494	0.8785	1.83189	1.78747	1.21624	1.34918
0.89838	0.9367	0.88574	0.956258		0.842682	0.7371	0.4845	0.82321	0.78955	0.69538	0.67285	1.51806	1.58778	1.42838
1.50416	2.23195	1.0955	0.613439		0.694302	0.81786	0.78935	0.68738	2.25334	0.79849	0.55	1.6832	1.15371	1.29996
1.22485	1.2365	0.8254	0.677045		0.578492	0.70344	0.69059	0.71028	0.61483	1.4322	0.71323	0.67723	1.66541	1.68558
1.03956	1.06713	0.92602	0.73478		0.671127	0.89163	0.78429	1.26712	0.59629	0.6494	0.54798	1.37016	1.6685	1.68129
1.40632	1.09889	1.12751	0.576261		0.675766	0.71121	0.97898	0.76707	0.71419	0.85896	0.62018	1.52976	1.57942	1.30362
0.89439	1.08155	1.5015	0.811259		0.721317	0.6929	0.55463	0.94171	1.86517	0.76789	0.72477	1.94389	1.88558	1.38447
1.03876	0.81937	1.23214	0.817796		0.736721	0.87938	0.87339	0.39337	0.8337	0.74776	1.24605	2.99441	1.3483	1.77052
1.0134	0.71144	0.93647	0.566039		0.416418	0.64685	1.0193	0.93216	0.75421	0.82218	0.81337	1.95925	1.59171	1.07089
1.00313	2.90448	0.63972	0.341773		0.753202	1.13281	0.70583	0.90684	1.84579	0.79801	0.73108	1.65785	1.62649	1.6895
0.93272	0.88442	0.98945	0.548486		0.538515	0.67839	0.82293	0.64817	2.29089	0.72695	2.53428	1.533	1.89444	1.663
1.06022	1.09662	1.19943	0.458961		0.889618	0.78973	1.50644	0.77953	0.91879	0.90625	1.35999	1.42275	1.53821	1.91452
0.75521	1.09985	1.73853	0.805916		0.757347	0.88969	0.72278	2.39681	0.61774	1.14736	0.76685	1.91993	1.42054	2.02135
0.57811	0.72801	1.10571	0.39447		0.564696	0.71648	0.98283	0.81332	0.76577	0.49517	1.03231	1.68662	1.05527	1.51818
1.69827	1.94378	0.77558	0.820646		0.828804	0.90682	0.81647	0.82518	0.82538	0.94113	0.85801	1.32678	1.35637	1.71024
0.70507	0.87532	0.86635	0.633703		0.592034	0.68226	0.67626	0.65488	0.9225	1.14541	0.46459	1.3598	1.52699	1.44294
0.96705	1.6872	2.06036	0.734086		0.883721	0.72801	1.35283	1.02435	1.29537	0.46369	0.91357	2.06856	0.91122	1.40682
1.40876	1.02115	0.96235	0.719979		0.600303	0.74729	0.7679	1.39464	0.70044	0.8314	2.07977	2.22675	1.7042	2.71433
1.10889	1.0556	1.85173	0.294083		0.949314	0.65883	0.71673	1.7114	0.7326	0.89305	0.79431	1.14492	1.77407	1.60421
0.76999	1.1279	0.87624	0.465937		0.841327	0.78506	0.81024	0.86628	0.62943	0.8682	0.93729	1.34097	2.07529	1.69928
1.038	0.86395	0.84822	0.554785		0.720394	0.94231	1.61691	0.66305	0.73851	0.62263	0.87499	1.48613	1.92011	1.2873
1.07821	0.90195	1.02732	0.927067		0.797628	0.75388	0.65167	0.86496	2.07681	1.30045	0.89494	2.17507	1.13824	1.57569
1.24523	0.82623	0.93377	0.607788		0.674511	0.90851	0.76905	0.87978	0.72468	0.63524	1.04956	1.16983	1.6911	1.51841
0.93869	1.03558	1.66697	0.933391		0.737161	2.18509	0.79796	0.67795	0.77693	0.81349	0.85644	1.59342	1.56309	1.78413
1.25125	0.45911	0.89588	0.431278		0.913585	0.39923	0.99633	1.00764	0.88717	0.7011	1.01081	1.43267	1.46947	1.39358
0.93127	0.96873	0.82962	0.676731		0.545422	0.87195	1.30781	0.78	0.68649	1.74467	0.82343	1.64409	1.3391	1.40645
1.02978	1.02582	0.65897	0.711015		0.490603	0.7249	0.94455	0.88673	0.89716	0.76652	0.92603	1.29631	1.39688	1.71574
0.67214	1.02151	1.21254	0.840713		0.838325	1.00467	0.85046	0.83845	0.93233	0.81552	1.03864	1.4658	1.49125	1.42934
1.40924	0.99147	1.01398	0.638008		0.617121	0.61758	0.81512	0.93176	0.88189	0.70913	2.17659	1.04182	1.65876	1.55862
0.77793	1.1077	1.05313	0.651386		0.764961	0.79668	0.63589	0.84387	0.77232	1.17421	1.84384	1.39336	1.22918	1.6539
1.17496	0.98563	0.67575	0.729213		0.787567	0.88606	1.07862	0.93018	0.64803	0.69089	1.09212	1.64115	1.81216	1.43469
1.85776	0.70061	1.16131	0.623039		0.767908	0.77913	0.87545	0.93769	0.69892	0.80735	1.00834	1.81788	1.58102	1.72203
1.13517	1.10211	2.54888	0.715227		0.973292	3.18439	1.3631	0.99729	0.71603	0.66178	0.8427	1.72972	1.67211	1.6037
1.42734	0.8723	0.96922	0.794581		0.749297	0.53743	0.89211	1.26892	0.69032	1.30334	0.63781	1.62594	1.45876	1.86089
1.44441	0.94371	0.97451	0.722862		0.42806	0.7056	0.71992	0.75248	0.89397	0.61252	0.87106	1.72191	1.15355	3.98948
1.15223	1.00741	1.01875	0.725552		0.793655	0.84572	0.65888	1.39255	0.73805	0.55367	0.98995	1.01249	1.47031	1.89996
0.70561	0.99564	1.48741	0.554788		0.828582	0.79383	1.15865	0.94078	1.43045	0.94003	2.26731	2.14711	1.28565	1.78272
0.85608	2.27368	0.81312	0.532137		0.796128	0.92872	0.71799	0.79148	2.11601	0.71717	0.79567	1.6982	1.85189	1.43403
0.67879	0.82814	1.13972	0.596188		0.724212	0.94831	0.58843	0.98328	0.38702	2.26717	0.722	1.54733	1.65092	1.77838
1.17159	0.95523	1.06335	0.836404		0.808026	0.70816	0.74652	0.75584	0.79192	0.41325	0.84096	1.17742	1.46535	1.87863
1.00493	1.99767	0.83807	0.809888		0.899523	1.00092	0.90938	1.60367	0.73621	0.92624	0.77232	1.4569	1.63075	1.64816
0.95687	0.95171	0.92043	1.5325		0.50943	0.72414	0.84653	0.9364	1.04432	1.67178	0.8281	1.88885	1.60969	1.66727
1.16408	0.89134	0.71759	0.499787		0.905565	0.8437	0.95256	0.7496	0.95662	0.74677	1.17731	1.74389	1.46992	0.92401
1.11211	0.8306	1.12024	0.781723		0.695048	0.64517	0.85959	0.79031	0.71393	1.14322	0.8542	1.71053	1.59543	1.00211
1.04633	1.21354	0.943	0.652839		0.798145	1.5329	0.70504	0.96574	0.6683	0.75762	0.82959	1.72322	1.84271	2.37754
1.67548	0.81926	1.18988	0.466926		0.838147	0.80487	0.91795	0.58651	0.63869	0.64206	1.0691	1.58543	1.82987	1.71689
0.96951	1.13056	1.104	0.753945		0.823697	0.92157	0.76964	0.84945	0.65257	0.53035	0.77255	1.68513	1.75032	1.4131
1.10351	1.10276	0.89572	0.486229		0.444656	0.76579	0.72751	1.02247	0.73825	0.5949	0.77756	1.76631	2.89831	1.38082
1.1196	0.86904	0.9902	0.572013		0.61335	0.87364	1.30279	0.96983	0.6993	0.54771	2.43914	1.64513	1.95835	1.5591
0.94325	0.69493	0.91328	0.790329		0.583446	0.92023	0.75374	0.91542	0.70494	0.89708	0.9873	1.70638	1.3894	1.73988
1.60163	1.28976	0.86089	0.552122		0.910532	0.38223	0.65091	1.60087	0.93273	0.66736	0.71344	1.57177	1.5865	1.82325
0.96746	0.68779	0.97424	0.703633		0.585163	0.84231	0.86213	0.66338	0.51706	0.87124	0.69694	1.82504	1.55992	1.70858
0.92419	0.89073	0.98465	0.685416		0.647982	1.17086	0.69497	0.75835	0.73732	0.75758	0.85095	1.59017	1.6941	1.72973
1.25439	1.03802	1.05514	0.557461		0.722556	0.71884	0.97881	1.54515	0.73594	0.94235	0.72887	1.44455	1.75237	1.38077
2.15175	1.19893	1.7309	0.556453		0.857453	0.84851	0.71056	0.86054	0.59422	0.88124	0.79273	1.10946	1.93596	1.90155
1.20966	2.23674	0.55021	0.654927		0.473488	0.75037	0.9204	0.58192	0.69117	0.85075	0.8993	1.47102	1.84989	1.57275
0.67262	0.90497	0.915	0.742478		0.696702	0.8025	0.63872	0.74357	0.90486	0.40615	1.01592	1.46133	1.27649	1.11333
1.17057	0.58997	1.00894	0.565463		0.455459	0.95714	0.58196	0.98359	0.92723	0.75206	0.94968	1.49224	1.35536	2.02131
1.01991	0.84932	1.03012	0.779811		0.816816	0.77191	0.96694	0.80969	0.74732	0.66573	0.77459	1.78687	1.48406	1.79031
1.17484	1.08709	0.56056	0.629627		0.847983	0.8739	0.57887	1.71891	2.28495	0.85117	0.82105	1.55862	0.86094	1.6564
1.1577	0.99582	2.25899	0.881792		0.743572	0.63252	0.91788	0.80451	0.89119	0.95868	0.90069	1.66409	1.41094	1.69629
1.15936	2.69314	0.93766	0.657598		0.793402	0.80572	0.89327	0.83611	0.95508	0.95991	1.05995	1.74036	1.35307	1.13711
1.04508	1.0297	0.93119	0.891029		0.686766	1.34171	0.96542	0.70669	0.9392	0.62427	0.62702	1.73966	0.56864	0.98263
1.04931	0.95112	0.77133	0.921155		0.717014	0.84094	0.93087	0.82877	0.83245	0.4797	1.32404	0.96231	1.45208	1.74866
1.11733	0.94128	0.94705	0.401149		1.15332	0.75323	0.76699	0.88247	0.65079	0.65916	1.1111	4.58983	1.88801	1.38927
1.03366	0.85587	0.86043	0.900199		0.775882	0.88882	0.81649	0.78793	0.65973	0.67466	0.74865	1.34581	1.87386	1.58366
1.05765	1.06161	0.9656	0.688559		0.471287	0.58491	0.84208	0.924	0.88838	0.74879	1.03059	1.73411	1.58329	1.11474
1.06178	0.85687	1.04917	0.992385		0.863443	0.88804	0.83057	0.79749	0.70671	0.86968	0.68814	1.63331	1.47953	1.61409
0.5531	2.65607	0.93364	0.781757		0.299478	0.76531	0.69122	0.84271	0.82649	5.2788	1.57481	1.51271	1.37541	1.83292
0.69302	0.78134	1.0905	0.560828		0.792191	0.8048	0.60982	0.99871	1.21583	0.89616	0.857	1.60392	1.64316	1.87905
1.01134	1.19146	0.92342	0.30537		0.778609	0.89162	2.55281	0.85224	0.96461	0.83653	1.03495	1.77675	1.7545	1.64702
1.09544	0.88657	1.14764	0.735955		0.811874	0.77089	0.97614	0.62523	0.82056	0.68177	0.50786	1.6418	1.93286	3.63881
1.18284	0.984	1.89547	0.806631		0.994359	0.67674	0.64435	0.8834	0.83412	1.00176	0.70134	0.95706	1.44489	1.47348
0.91307	1.12164	5.34333	0.696916		0.598813	0.8418	0.98629	0.86865	0.76477	1.08038	1.96004	1.66961	3.11893	1.65233
1.88271	0.97354	0.83394	0.735901		0.536156	0.68848	0.52436	1.02901	0.72975	0.71974	0.82521	1.04897	1.66948	1.89664
1.11563	0.67274	0.82065	1.32145		0.520772	0.7502	0.7536	0.64981	1.17821	0.82817	0.66526	1.75119	1.79371	1.75803
0.89547	2.3029	0.95753	0.55888		0.843766	0.89585	0.71	0.85263	0.65325	0.7786	0.72	1.75604	1.72826	1.06144
1.03637	0.93244	1.16135	0.668694		0.83874	0.80947	0.82515	1.60194	0.7786	0.95892	1.12374	1.89788	1.65997	1.52695
1.07491	0.93898	0.89476	0.655667		0.771449	0.856	0.78089	0.97699	0.65876	1.74534	0.80862	1.63308	1.79058	2.54703
1.18712	2.37282	0.93144	0.910511		0.774124	0.87535	0.49395	0.85263	0.4938	0.64407	0.95379	1.45125	1.81591	1.26812
0.97279	0.79995	1.07904	0.743738		0.93061	0.68327	0.94215	0.92793	0.6048	0.53145	2.49337	1.78936	1.88872	1.2131
0.95195	0.61994	1.0265	0.544625		0.785969	1.09798	0.68836	1.12406	1.51838	1.00009	1.13304	1.61748	1.65141	1.84505
0.92638	1.00027	0.65998	0.52736		0.78311	0.6984	0.57727	1.85227	0.74619	0.72739	0.8547	2.03772	1.79994	1.27543
0.71629	4.43241	0.83931	0.821429		0.306381	0.99768	0.84355	0.85304	0.67917	1.01778	0.55546	1.49704	1.29161	1.59761
1.38174	0.60861	0.87484	0.556402		0.658166	0.84418	0.88187	0.93279	0.73516	0.6708	2.07725	1.33435	1.63676	1.42318
0.92235	2.67275	1.07185	0.930263		1.12137	0.93555	0.79314	0.85272	0.70884	2.07407	0.85294	1.81255	1.6627	1.39919
0.91277	0.9427	0.40063	0.649192		0.517898	0.8709	0.79106	0.89867	1.50337	0.88254	0.77119	1.78392	1.95804	1.3499
1.14739	0.94625	0.96342	0.461251		0.730119	0.861	2.04415	0.79412	0.6699	0.52453	0.77487	1.32141	2.03174	1.55659
1.29637	1.10072	1.04079	2.25402		3.82697	0.77172	0.96117	0.7562	0.85544	0.73285	0.70688	1.40349	1.96972	1.68924
0.98413	0.95628	0.95073	0.720958		0.508659	0.60791	0.62407	0.79469	1.05934	0.81272	0.4866	1.42335	1.51428	1.71173
1.13259	1.03443	0.79328	1.41431		0.770529	1.12764	0.80317	0.82926	0.86429	1.0619	0.79215	1.61243	1.62849	1.47871
0.92481	0.71789	0.84675	0.496129		0.704633	0.76057	0.87803	0.69123	0.8356	1.06457	0.66603	1.69594	1.68092	1.34423
1.20627	0.90471	1.62867	0.71574		0.775512	1.49355	0.62789	0.92847	1.04479	0.51602	0.64155	1.2784	1.45287	1.67707
1.06011	1.03527	0.98357	0.741323		0.402571	1.02017	0.94968	0.91489	0.51094	0.70115	0.85669	1.7473	1.48747	1.63418
0.96488	0.63019	1.09418	0.673301		0.664457	0.83484	1.72776	0.75058	0.82376	0.88119	2.60869	1.7907	1.52912	1.54377
0.85651	0.97418	1.05606	0.796422		1.0024	0.97298	0.64671	0.84997	0.86935	0.93725	0.6484	1.70462	1.37132	2.83514
1.20277	0.89133	0.91087	0.461967		0.727222	0.83283	0.65839	0.73805	0.83625	0.68186	0.68956	1.78499	1.96475	1.26467
1.01919	0.73923	0.99589	0.427478		0.521043	0.85872	0.72885	0.3566	0.71254	0.56322	0.98082	1.87522	2.02212	1.63186
0.61301	1.63249	0.80099	0.522697		0.994443	1.59837	0.48297	0.67765	0.52101	0.71806	0.89641	1.50599	1.55821	1.6635
1.59089	0.89716	1.10031	0.584109		0.766447	0.87712	0.60982	0.73667	0.802	2.21449	0.70362	1.68429	1.87646	1.14241
1.64262	0.69311	1.05675	0.446268		0.428329	0.83571	0.53168	1.03811	0.83286	0.9862	0.85042	1.43831	1.33499	1.95255
0.91578	1.08035	1.21294	0.64084		0.689266	0.8256	0.79927	0.95751	0.81361	0.66529	0.87948	1.70135	1.54825	1.90964
1.05398	2.10975	0.91909	0.467681		0.707919	0.72432	0.85286	0.9244	0.78175	0.77385	0.91576	1.23866	1.62339	0.89557
2.69484	1.01379	1.05414	0.701645		0.983903	0.95704	0.83395	0.93879	2.26934	0.86598	0.39501	1.63655	1.39501	1.64622
0.91415	0.89687	1.07361	0.681711		0.784561	0.78801	0.73817	0.27851	0.87985	0.9549	1.03632	0.23051	1.62524	1.90879
0.92971	0.65045	1.02086	0.769003		0.591033	0.80096	0.99539	0.6013	0.66047	0.82182	0.72815	1.18336	1.42071	1.37975
1.25453	1.17535	0.90082	0.648993		0.724739	0.72089	0.9343	0.51167	0.73256	0.69689	0.74265	1.69519	1.80074	0.88988
2.33522	0.95649	0.89095	0.628153		0.606042	0.85056	0.99388	0.67695	0.84386	0.64259	0.80059	1.49434	1.71425	1.58156
2.0535	1.01628	1.05532	0.588073		0.783087	0.84088	1.05564	0.95416	0.88958	0.78483	0.92103	1.54303	1.48997	1.78294
2.29756	0.99109	0.96824	0.834022		1.00959	0.80625	0.87937	0.84771	0.83955	0.73624	0.99318	1.71902	1.75073	1.6064
1.14866	1.01307	1.02545	0.535666		0.797671	0.62169	0.58385	0.84495	0.63555	0.96673	2.47668	1.28787	1.36121	1.51987
1.39152	1.08554	0.96782	0.736996		0.756659	0.48412	0.81515	0.65923	0.63733	0.96419	0.71203	1.74036	1.75536	1.47653
0.77172	0.71482	0.89152	0.524722		0.964937	0.93588	0.68196	0.83898	0.74108	0.57628	0.75547	1.70953	1.72341	1.70948
0.99598	0.80333	0.86877	0.538265		0.386433	0.79871	0.87284	0.8041	0.51835	0.94656	0.64724	1.26514	1.30613	1.76939
0.99773	1.06553	1.06036	0.608593		1.1399	0.70357	0.45507	0.8328	0.65693	0.73846	0.74919	1.11213	1.68825	1.38239
0.97417	1.00247	0.8262	0.658662		1.08387	0.97686	0.89263	0.69544	0.85796	1.00263	0.9854	1.35756	1.45552	1.59918
0.87879	1.00043	1.32827	0.124414		0.731975	0.66617	0.66654	0.85235	0.83035	0.75072	0.76065	1.46583	1.5622	1.61314
1.03589	1.05601	0.83986	0.283162		0.72983	0.92068	0.48088	0.96392	0.73002	0.82168	1.00558	1.64638	1.29912	1.78062
0.87042	1.10478	1.21609	0.702735		0.733683	0.89092	0.79286	0.67996	0.69444	1.24614	0.90573	1.4277	1.5658	1.84767
1.08684	1.0283	1.06106	0.431377		0.524315	0.81624	0.91544	1.05704	0.69047	0.93601	0.75887	1.42342	1.67728	1.29327
1.16701	1.50208	1.05293	1.16879		0.872724	2.12618	1.3597	1.01471	0.6382	0.96525	0.99472	1.58029	1.61381	1.15304
1.24979	1.01253	1.01633	0.698582		0.625107	0.58369	0.80113	0.82765	0.71935	0.74176	1.09113	1.78652	1.45416	1.29148
1.24505	0.52068	1.01996	0.406688		0.846695	0.92876	1.01668	0.91108	0.85615	0.8977	0.74419	1.9608	1.66427	1.94765
1.10746	0.66099	1.48866	0.464673		0.434052	0.49457	0.83944	0.90458	0.9375	0.85328	1.12221	1.23658	1.60519	1.39554
1.36124	1.01211	0.83703	0.449972		0.606556	1.70537	0.61228	1.83603	0.66651	0.78995	0.74821	1.7111	1.88587	1.44793
1.66292	1.48113	1.19153	0.749289		0.703606	1.48005	0.88042	0.93244	0.55421	2.07293	0.8562	1.91378	1.56321	1.75773
1.58003	0.7676	1.03883	1.38602		0.921214	1.17055	0.73598	0.90793	0.87054	0.6402	1.66475	1.10141	1.64997	1.41752
1.30704	1.0473	1.34662	0.776197		0.687309	0.72687	0.76228	0.91031	0.88889	0.72688	0.89555	1.71209	1.47553	1.32652
1.21656	0.78728	0.72927	0.700655		0.495626	0.84955	0.82629	0.80179	0.55441	0.87155	1.66225	1.66351	1.53517	1.36324
0.99772	2.07034	1.01715	0.795011		0.722694	0.80847	0.81001	0.75665	0.83822	0.47752	0.69751	1.47009	1.65266	1.59212
1.18054	1.35957	0.92987	0.533558		0.83436	0.77806	0.94932	0.94423	0.69181	0.77149	0.79082	1.31228	1.81805	1.46906
0.91567	1.14813	0.95347	0.649651		0.568892	0.57786	0.85543	0.87104	0.77703	0.7175	0.83726	1.244	1.68825	1.3916
0.90058	0.60667	0.94707	0.862422		0.552156	0.5297	0.92321	1.00356	0.47231	1.77279	0.62721	1.78428	1.57263	1.69212
1.16389	1.76129	1.45806	0.704993		0.487981	0.63467	0.67754	0.86832	0.72635	0.92843	0.72553	1.70809	1.71039	0.96176
0.684	0.98376	1.09264	0.67212		0.714665	0.9112	0.4282	0.89429	0.88007	0.96329	0.6695	1.51565	1.78585	1.80665
0.93159	1.10247	1.12159	0.741919		0.768859	1.28801	0.86768	0.77229	0.84811	1.34066	0.58146	1.66893	1.49999	1.54094
1.06282	0.9449	0.91953	0.729254		0.583485	0.58304	0.69422	0.92567	0.61414	0.71288	0.82741	1.44214	1.77263	1.67143
1.06302	0.83393	1.26921	0.466287		0.383883	0.66071	0.75837	0.7193	0.91856	0.84804	0.59827	2.47251	1.63534	1.7185
1.1043	0.83436	0.87425	0.741507		0.856129	2.90883	0.90135	0.86273	0.83034	0.78377	0.77746	1.6904	1.76178	1.44074
2.14739	1.02089	0.93866			0.836058	0.97309	0.66901	0.78874	0.7896	0.56975	0.78097	1.64944	1.47341	1.25926
0.84474	1.05126	0.61036			0.751502	0.89989	0.90451	0.51535	0.72628	0.95885	0.69895	0.88855	1.70114	1.65086
1.15163	1.14706	1.43367			0.59901	0.7352	0.83374	0.97814	1.03761	0.67874	0.68241	1.86965	1.49021	1.74958
0.96138	0.99963	1.16729			1.26985	0.48965	0.83921	0.83704	0.83195	0.96249	2.3791	1.59852	1.64518	1.77958
0.98869	1.04857	1.0207			0.531029	1.34531	0.69932	0.93007	0.73102	2.05761	0.70254	1.36827	1.61014	1.89226
0.90622	0.99265	1.07097			0.622026	0.58547	0.88852	0.87311	0.78492	0.67541	0.99535	1.62763	1.53175	1.79145
1.00706	0.95994	1.17276			0.876296	0.94203	1.26347	1.24868	1.07602	0.62449	0.92474	1.52113	1.37587	1.64763
0.95256	0.71761	1.08128			0.837931	0.88578	0.85491	0.7798	0.74334	0.88961	0.79569	1.67306	2.16522	1.57349
1.20155	0.94268	1.07035			0.917759	0.76205	0.7694	0.94285	0.73307	0.70075	0.83985	1.40693	1.82614	1.66045
1.2029	0.92458	1.00729			0.818425	0.74679	1.32705	1.81792	0.59793	0.82454	0.77287	1.60958	1.18012	1.7993
1.12406	0.92107	0.77322			0.612164	1.066	0.77743	0.66277	0.95067	0.85912	0.60134	1.35223	1.80149	1.66706
0.82736	0.84217	0.80698			0.678128	0.89722	0.51982	0.67647	0.69913	0.57004	0.92769	1.6418	1.80673	0.97964
1.13498	1.03244	1.0829			0.52181	0.82237	1.12198	0.60124	0.75182	0.80339	0.89968	1.73905	1.92712	1.10588
2.01333	0.94492	0.68678			0.553797	1.09518	0.54537	0.78291	0.87315	0.72015	0.90149	1.80892	1.86633	1.52643
0.98617	1.1517	0.99074			0.644904	0.54532	0.96654	0.85497	0.83111	1.55344	0.92439	1.53134	1.77431	1.55752
3.25529	0.93111	0.9365			0.681954	0.7521	0.6453	0.83984	0.74435	0.72436	0.81666	1.43262	1.53003	1.37899
1.08211	0.90246	1.81287			0.704159	1.48902	2.16915	0.89986	0.77515	0.83068	0.84334	1.15918	1.50984	1.75281
1.62976	2.33955	0.89742			0.749616	0.70849	0.37553	1.05678	1.24026	2.12754	0.89925	1.39839	1.46687	1.52109
0.83196	0.97076	1.46713			0.579505	0.69493	0.7948	0.62805	0.89021	0.70456	1.18888	1.58118	1.47642	1.7294
0.99635	0.74903	1.39617			0.695887	0.85388	0.97899	1.17742	0.71048	1.54664	0.87634	1.7511	1.50119	1.33883
1.23381	0.95657	0.8938			0.894793	0.771	0.74099	1.36978	2.0334	0.89311	1.88597	1.57653	1.87552	1.75284
1.12052	1.09561	1.2302			0.603383	0.92581	0.79039	0.79808	0.79248	0.70855	0.98944	1.45698	0.56242	1.73929
0.8036	0.68742	1.16096			0.713203	0.76325	0.50372	0.60876	0.66887	0.67916	2.41493	1.57446	1.91253	1.36232
1.00971	0.75446	0.75099			0.406634	0.9636	0.6347	0.93385	0.60054	0.63442	0.82834	1.05257	1.59298	1.12686
1.00011	0.97769	0.9477			0.485131	0.73521	0.85642	0.86641	1.08078	0.72993	0.77032	1.47882	1.57629	1.34564
2.52169	1.14248	1.53521			0.85835	0.69891	0.81118	1.02161	0.70606	0.83728	0.55122	1.33111	1.70609	2.23379
0.61619	0.62021	0.91289			0.40139	0.97802	0.7269	0.77874	0.50106	0.82721	0.92963	1.15769	1.78501	1.26558
1.04106	0.7803	0.82001			0.528232	0.72356	1.18083	1.01066	0.68519	0.73106	0.78766	1.79758	1.25072	1.5081
1.09052	1.00202	0.80159			0.762004	0.57957	0.75908	0.59491	2.05184	0.92034	0.7132	1.33137	1.4491	1.77505
2.43253	1.94761	0.8139			3.15813	1.08771	0.87864	0.81	0.83886	0.69626	0.85313	0.92576	1.66381	1.17583
0.77781	1.09414	0.94928			0.89541	0.71208	0.90131	0.76888	0.86963	0.5988	1.05335	4.62834	1.65261	1.55599
1.03476	0.95948	1.15253			0.454271	0.72396	0.92336	0.6487	2.0605	0.62027	0.51362	1.75326	1.41536	1.24424
1.01683	0.87988	1.25165			0.689626	0.93637	0.75913	0.93154	0.87005	0.91938	0.74203	1.14002	1.71461	1.63263
0.98775	0.95176	0.84599			0.698156	0.7386	0.71239	0.71858	0.74771	1.41035	0.75643	1.5611	1.68996	1.24172
0.90027	1.13829	0.97924			0.794887	0.85368	0.95507	0.81062	0.78984	0.81742	0.73907	1.48985	1.8337	1.58949
0.98191	1.33994	1.00322			0.672804	1.45739	2.19238	0.94152	0.70796	0.6776	0.82295	1.46906	1.49938	1.60242
1.00868	0.83912	0.78441			0.698415	0.6982	0.78382	0.7014	0.46438	0.88218	0.95941	1.45841	1.87468	1.23748
0.81596	0.64079	0.87907			0.644441	0.97824	1.03594	0.88254	0.73805	0.73925	1.04302	1.51798	1.84977	1.57783
0.9266	2.22018	0.92592			0.706233	0.65696	0.66025	0.60238	0.77523	0.44267	0.69874	1.79464	1.88705	1.66499
1.0086	0.98908	1.24663			0.456602	0.76916	0.51854	0.58801	1.08151	0.77132	0.91165	1.68111	1.63327	1.7828
0.59103	0.70755	0.7587			0.912919	0.86801	0.89866	0.86266	0.96178	0.82277	0.57548	1.17593	1.4515	2.02286
0.72983	0.78831	1.07727			0.582682	1.04055	1.18664	0.76357	0.86183	0.66684	0.69457	0.53247	2.08804	1.78563
0.98581	0.75397	0.90332			0.730993	1.56067	0.94534	0.92413	0.61273	0.80698	0.57559	1.51236	1.68166	1.63373
1.02266	0.79741	0.84857			0.877828	0.84882	0.93477	0.82438	0.59855	0.81543	0.85937	1.82421	1.75102	1.09372
0.9796	0.97528	0.93505			0.524387	0.83939	0.69065	0.95868	0.68606	0.93396	1.4197	1.85338	1.71542	1.53658
1.09928	0.93329	1.87465			0.767795	0.87697	0.90797	0.79688	0.92895	2.66644	0.78875	1.35939	2.106	1.35234
1.21706	1.59301	1.01029			0.588311	1.01206	1.59077	0.43123	0.62318	0.801	0.66622	1.70805	1.75618	1.39618
0.92225	0.86528	0.79942			0.764264	0.66422	0.7503	1.05005	0.76999	1.09751	0.74132	2.01519	0.59016	1.68909
1.04713	2.76347	4.39429			0.771627	0.6976	0.65559	0.97771	0.74749	0.72885	0.58556	1.73918	1.62548	0.83602
2.44722	0.84644	0.71252			1.01344	0.793	1.00822	1.08837	0.48371	0.94075	0.84234	1.59645	1.75565	1.62222
0.91281	0.63442	0.82049			0.559431	0.72102	0.77258	0.87969	1.14289	0.66761	0.65143	1.86168	1.79746	1.89263
1.05085	0.99713	0.98302			0.998998	0.71786	0.83751	0.52987	0.62793	0.84744	1.17736	1.51867	1.80998	1.59334
0.91843	1.24798	1.77701			0.764638	0.90665	0.87453	0.83595	1.06074	0.83348	1.14444	1.48402	1.5772	1.66616
0.87303	1.06102	0.91601			0.653894	1.12339	0.63845	0.66411	0.80338	1.01106	0.87341	2.00977	2.04441	1.58761
0.8	0.77787	1.0219			0.290617	0.83223	0.85431	0.68709	0.71937	0.85461	0.86769	1.50759	1.30286	1.58397
1.00653	0.94406	0.98764			0.53898	0.6439	0.84995	1.42844	0.6481	0.79283	0.63445	1.63722	1.66428	1.77211
0.98472	1.11104	0.98067			0.883343	0.76397	0.95879	0.76661	0.84501	0.7876	0.67612	1.61516	1.64238	1.89504
0.8937	0.96741	1.13714			0.58461	0.57624	0.80592	0.89999	0.77229	0.67135	0.73989	1.52095	1.66606	2.55797
0.8746	0.91524	0.87897			0.795417	0.79895	1.05339	0.87685	0.73149	0.72092	0.61758	1.49343	1.46259	1.61364
1.07647	1.12523	0.92121			0.764088	0.51343	0.72769	0.95321	2.26607	0.79683	0.88814	1.33697	1.42625	1.68797
1.23562	1.23396	0.96521			0.649804	0.68775	0.68328	0.76507	0.88719	0.80712	0.83527	1.77776	1.46032	1.61034
0.67927	0.7599	1.27982			1.23788	0.80915	0.80715	0.87258	0.63549	0.89627	1.0296	1.70649	1.87417	1.30221
0.91191	0.99599	1.65172			1.01159	0.88686	0.80526	0.70118	0.9418	0.85851	0.67137	1.74853	1.52919	1.38121
0.68623	0.89616	0.88067			0.225939	0.84275	0.74896	0.72157	0.86838	0.69701	0.63488	1.65391	1.15281	1.5477
0.90844	0.99876	0.87054			0.618641	1.33863	0.89437	0.85019	0.56273	0.75948	0.93992	1.3857	1.90892	1.73214
0.83771	1.13926	1.05416			0.547091	0.66739	0.42142	0.94299	0.66249	0.7855	1.06271	1.78335	1.50435	1.224
1.27009	0.82283	0.94983			0.595161	0.74009	0.98091	0.27219	0.78026	2.57569	0.85985	1.6741	1.73418	2.18036
1.05392	0.82625	2.31282			1.00988	0.93521	0.85662	1.31211	0.86982	0.46226	0.72916	1.40922	1.29809	1.4663
0.74622	1.12756	0.7926			0.804253	0.80619	0.84897	0.64427	0.64532	0.92488	0.89425	1.58971	1.64169	1.63632
0.94906	1.19951	1.05552			0.676281	0.89291	0.87646	0.58087	0.81468	0.40373	0.9256	1.90863	1.62604	1.11314
0.94444	1.01308	1.41011			0.389109	0.58996	0.94789	0.91969	0.8978	0.95455	0.68647	1.7864	1.54462	1.58215
1.00311	0.8006	1.12803			0.897305	0.98155	0.6957	0.66905	0.99755	0.95872	0.73865	1.0254	1.64298	1.52743
1.13349	2.01246	1.13681			0.996478	0.533	0.73285	0.61236	0.60095	0.96893	0.77736	1.6883	1.72749	1.45803
0.91338	0.97214	0.8801			0.386303	0.65588	0.88454	0.88853	0.76032	0.67203	0.55513	2.07066	1.9219	1.378
0.90616	1.02882	1.20678			0.778088	0.57765	0.63536	0.7186	0.79813	0.75027	0.77971	1.52061	1.70372	1.79492
1.35808	0.80925	0.89975			3.21532	0.73782	1.50051	0.87934	0.80168	0.73311	0.8522	1.0814	1.79944	2.93094
1.96133	0.72953	0.77157			0.828638	0.86879	0.94118	0.78602	0.86492	0.78711	0.71482	1.56952	4.8388	1.47568
0.9707	1.15158	1.02497			0.826092	0.85318	0.72782	0.83053	1.05054	1.08182	1.51687	1.7277	1.32773	2.11594
1.09417	0.98179	0.67042			0.893907	0.63489	1.01454	0.81933	0.65621	0.67234	2.38615	1.54687	1.62182	1.72806
1.07587	0.70245	1.12448			1.79768	0.49571	0.8416	0.86867	0.65583	0.69059	0.87226	1.71064	1.22362	0.44903
0.73977	1.07808	1.11759			0.576749	0.68082	1.51982	0.7061	2.60423	0.68243	1.14665	1.16994	1.79413	1.22204
0.98573	0.96693	0.88517			0.886094	0.78304	1.87361	0.96704	0.79266	0.82289	2.32404	1.47868	1.30873	1.47018
1.48727	0.75349	0.92839			0.472656	0.94407	0.86219	0.81976	1.26693	0.7226	0.84773	1.52042	1.61601	1.72985
1.84289	1.3419	0.80015			0.794102	0.81536	1.01781	0.92456	0.82575	0.9001	0.77912	1.61344	1.55557	1.82652
1.8918	0.97466	0.95649			0.659126	1.55775	0.50981	0.71364	1.67965	0.92402	1.01693	1.68208	2.20242	2.18709
1.18099	1.10848	1.18229			1.08099	0.55657	0.62807	1.23036	1.02316	0.74887	1.97995	1.17481	1.6338	1.59927
0.78984	0.95767	0.98778			0.44088	0.74047	1.11265	0.84024	0.8144	0.71058	0.82525	1.55781	1.58812	1.64345
1.15664	1.17271	1.02032			0.633773	0.91804	0.68402	0.85683	0.81924	0.9964	0.9421	1.23895	1.60692	1.51783
0.82336	2.42532	1.16722			0.709769	0.95455	0.85254	0.84805	1.10951	0.90211	0.75267	1.94035	2.374	1.78055
1.23387	0.94732	0.98481			0.85838	2.12368	0.81555	0.77265	0.70913	0.53393	0.94903	1.77547	1.4679	1.46669
0.77586	1.15307	0.85482			0.348064	0.82628	0.73205	0.82336	0.86707	2.32037	1.06966	1.78412	1.33351	1.71197
0.8756	0.79653	1.13243			0.779508	0.81807	1.49114	1.20007	0.70656	0.84199	0.84154	1.56632	1.04399	1.6589
0.6705	0.8542	0.94255			0.70007	0.83327	0.85886	1.03397	2.5176	0.86229	0.76693	1.50747	1.57002	1.4303
1.09389	0.78535	1.83809			0.799485	0.75751	0.67748	0.67833	0.76338	0.80277	0.67265	1.82413	1.59281	1.56766
0.44693	1.04868	1.21049			0.654758	0.67942	0.54515	0.59256	0.83322	0.91309	0.79042	1.62676	1.51302	1.23694
0.93641	0.76511	0.96338			0.614805	0.67462	0.90319	0.67645	0.66303	0.81404	1.41206	1.64298	1.41698	1.42293
1.07312	0.9183	1.20921			0.633645	0.58809	1.73709	0.8221	0.72852	0.79534	0.52707	1.15168	1.67814	1.36745
2.20184	1.08004	1.06144			0.929891	0.67851	0.85486	0.75656	0.77553	0.61875	0.46696	1.50085	1.63364	1.80726
0.96552	1.6724	1.14237			1.153	1.79487	0.8115	0.54196	0.88221	0.65171	0.76028	1.79709	1.47811	1.62242
1.49238	1.51294	0.78826			0.75519	0.84314	1.3455	1.35906	0.60871	0.64067	0.79396	1.69844	1.5035	1.41434
1.15171	0.79005	1.04615			0.593455	0.92035	1.08073	0.57499	0.45486	1.61777	0.84506	1.61333	1.49706	1.81506
0.87804	0.98758	0.97495			0.394944	0.68199	0.76093	0.94257	0.73175	0.71546	0.6532	1.47949	1.62363	1.41903
1.4233	0.93213	1.40698			1.05347	0.57006	0.8818	1.17734	0.78245	0.77293	0.71891	1.55897	1.92181	1.11319
1.00916	0.73825	0.82462			0.977375	1.40184	0.6884	1.53013	0.78417	1.07117	0.81139	1.86419	1.00517	1.77494
1.72381	1.08225	0.81248			0.70773	0.78933	0.65514	0.57777	1.07084	0.90903	0.78235	1.63821	1.88932	1.30257
1.15672	0.87065	1.07591			0.917579	0.98858	0.77856	1.13228	0.57432	0.68969	0.74104	1.21747	1.87678	1.94276
0.90488	2.23393	0.86707			0.659709	0.96868	0.81536	0.80128	0.9295	0.8571	1.09946	1.50089	1.41191	1.68026
1.39667	1.04783	0.88567			0.606771	0.71855	0.83568	0.83683	0.66457	0.95155	2.03309	1.74442	1.37121	1.86143
0.89714	0.96451	1.0483			1.02709	0.69256	0.80763	0.83156	0.77244	0.86019	0.79352	1.56367	1.81064	1.67883
0.74452	1.06481	0.98827			0.825833	0.60652	0.99879	0.92699	0.63169	1.31395	0.81987	1.78524	1.69581	1.60981
1.07235	0.95682	0.76969			1.499	0.92494	0.72175	0.78471	1.52859	0.9173	0.8814	1.0839	1.68639	1.53847
1.00675	0.7702	0.77179			0.605965	0.87973	0.86559	0.76991	0.6425	0.78228	0.81271	1.86003	1.5521	1.84757
1.07442	0.72832	0.89219			0.735028	0.85864	0.89695	1.23235	1.28337	1.68211	0.86998	1.77461	2.1369	1.71474
1.15317	1.10481	0.76184			3.28902	0.54426	0.99743	0.7398	0.67628	0.48356	0.36457	1.48568	1.72767	1.80862
0.86198	0.90163	1.33167			0.873033	0.95273	0.96836	0.81012	0.94568	0.78825	0.65682	1.74209	1.81203	1.88355
1.31034	1.10212	1.48446			0.777785	0.83665	0.90352	0.76153	0.9865	0.62923	0.86188	1.27344	1.61093	1.3861
1.00648	0.91326	1.26477			0.810273	0.56011	0.38303	1.01008	0.90705	0.74862	0.67052	1.4749	1.43496	1.39169
2.09057	1.01138	0.85526			0.706463	0.75486	0.87788	0.48991	0.70027	0.58506	1.51451	1.72191	1.68479	1.90243
1.04995	1.2701	0.9775			0.856174	1.06938	0.63732	0.78891	0.90422	0.79434	0.53494	1.62979	1.52259	1.48594
1.29183	1.67641	0.85921			0.543586	0.58747	0.66207	0.85802	1.04201	2.02747	0.71116	1.71684	1.94281	1.73146
0.83023	1.06607	0.90509			0.605923	0.88911	0.93191	0.89423	0.81916	0.62646	0.73661	1.04044	1.58491	1.68122
0.85555	0.72822	0.92622			0.616978	0.85259	0.72904	0.74475	0.45443	1.10081	1.67719	1.7423	2.03875	1.43815
0.72532	0.77063	0.81077			0.801535	1.1181	0.74013	1.09922	1.05892	0.95506	1.00005	1.8459	1.81594	1.78216
0.7552	0.92544	1.08116			0.542184	0.77322	0.69031	0.73953	1.66691	0.73792	0.76374	2.04035	1.21447	1.44608
0.88767	0.90241	0.81085			0.848851	0.8252	1.50551	0.64438	2.61665	0.5476	0.92576	1.86055	1.42064	1.18609
1.24459	0.74655	0.80199			0.633706	0.73289	0.90077	0.85541	1.08477	0.63201	0.82049	1.87304	1.78777	1.84417
1.17344	1.00037	1.13932			0.638987	0.89008	0.89742	0.82141	0.5157	0.7651	2.25265	2.05418	1.34874	1.92709
0.92824	0.76123	0.93965			0.662035	0.81342	0.54762	0.84739	0.82458	1.37795	0.91336	1.10894	1.44882	1.71959
0.74339	0.83238	1.01265			0.319851	0.70965	1.7947	0.78178	0.9112	0.70777	0.95241	1.52889	1.6512	1.61064
0.77079	1.12664	1.03353			0.570714	2.13121	0.90891	0.48925	0.77121	0.74184	1.56546	1.76567	1.13374	1.53692
0.98665	2.3939	1.03427			1.20839	0.77566	0.67574	0.70143	1.91084	0.72222	0.74596	1.75706	1.4482	1.2639
1.23472	0.86867	0.4253			0.616014	0.85335	0.78394	0.83459	0.73064	0.8679	0.89073	1.24135	1.44696	1.68458
0.80474	1.67476	1.4356			1.00289	0.8893	0.85109	0.74392	0.72008	0.79874	0.71456	1.5485	1.17167	1.70293
1.00124	0.70719	0.55699			0.58486	1.35158	0.88079	0.88908	0.71943	0.85085	1.91418	1.57154	1.38794	1.66663
1.17994	1.10314	0.93831			0.580582	0.83425	1.95334	0.88588	0.93663	0.85404	0.89338	1.96221	1.59907	1.12689
0.92462	1.08679	0.91885			0.445294	0.84127	0.80941	0.92344	0.60696	0.82154	0.79096	2.93946	1.49068	1.1932
0.67203	0.79088	0.98596			0.769721	0.95768	0.67643	0.94134	0.93289	0.84759	0.86353	1.66453	1.54136	1.58534
1.01176	0.91445	0.75001			0.721639	0.83377	0.71584	0.69715	1.04333	0.9381	0.68307	1.42262	0.58356	0.88725
0.64352	0.92827	0.9628			0.694065	0.87378	0.82349	0.90976	0.85619	1.49691	0.7052	1.13285	1.44439	1.58007
1.69917	1.51305	1.0863			0.702521	0.70768	0.46818	0.82786	0.54854	0.89349	0.89339	1.62217	1.82664	1.48817
0.94264	2.50682	1.16618			0.664497	1.10379	0.92972	0.75424	0.37535	0.72446	0.77879	1.76929	1.76258	1.32072
0.84866	1.04729	0.88834			0.880052	0.88402	1.68257	0.8855	0.90793	0.65978	0.76143	1.73871	1.1999	1.64855
0.71316	1.08023	0.61962			0.741899	0.91451	1.01068	0.76083	1.78823	0.69457	1.0024	1.52085	1.2987	1.89123
1.96525	1.07013	1.42786			0.439224	0.66512	0.85521	0.49429	0.67486	0.8117	0.90809	1.6391	1.62521	1.76825
1.13051	0.60005	0.92172			0.927042	1.81586	0.74784	0.85428	4.82206	0.83142	0.70539	1.01335	1.58982	1.36937
1.16295	0.90033	0.97131			0.910243	0.62442	0.69294	0.67721	0.74736	2.24159	0.76519	1.5877	1.06645	1.23806
1.05408	0.9683	1.19876			0.446198	0.87807	0.44526	0.7165	0.60514	2.59078	0.7768	1.26829	1.58765	1.94731
1.15269	0.90078	1.19571			0.633063	0.68052	0.91532	0.62976	0.76595	0.7731	0.7526	1.67092	1.27965	1.24261
0.96031	0.96256	1.69993			0.621735	0.77811	0.83197	0.96176	0.69774	0.74482	0.90002	1.63639	1.17097	1.6386
0.86645	1.10702	1.0885			0.80822	0.76766	0.69858	0.82997	0.50514	0.77279	2.21357	1.48469	1.924	1.79873
1.22923	1.0284	0.78991			0.809948	0.87716	0.73708	0.51861	0.87613	1.41218	0.68074	1.55073	1.63789	1.56503
0.94825	0.88668	0.87164			0.856701	0.9201	0.84436	0.68445	2.19408	0.69574	0.82738	1.41116	1.69373	1.36019
1.05925	1.2227	0.9493			0.718969	1.4273	0.84763	1.19638	0.73012	0.83837	0.77923	0.80845	1.69453	1.65658
1.19148	0.9885	1.83306			0.56289	0.9958	0.8437	0.72178	0.9498	0.76449	0.80179	1.55022	1.97395	1.91668
0.94634	1.05731	0.97174			0.53148	0.7823	0.5163	0.84017	0.72377	0.7949	0.80804	1.51577	1.64192	1.14783
1.53617	1.27616	1.1302			0.422301	0.79419	0.81471	0.76828	1.04548	0.75879	0.83303	1.69555	4.12666	1.86618
0.85268	0.80374	1.05951			0.745184	0.78403	0.78391	0.74169	1.88491	0.81209	0.90738	1.82233	1.39656	1.74519
1.59118	1.08571	1.13478			0.754819	0.58031	1.48498	1.05066	0.33626	0.4773	0.67866	1.58318	1.80872	1.35503
0.92703	0.95439	1.29126			0.708124	0.82453	0.84266	0.79216	0.60131	0.83973	0.82464	1.13051	1.59179	1.48785
0.93407	1.17563	0.81008			0.633441	0.79749	0.80789	1.41123	0.78965	0.98488	0.82114	1.5363	1.89015	1.65873
0.62704	1.28865	0.80991			0.726426	0.97201	0.78901	0.8515	2.62697	1.04379	0.55651	1.48174	1.69521	1.46746
2.01971	2.79315	1.49915			0.768945	0.64326	0.77123	0.93385	0.83723	1.49951	0.676	1.75557	1.55322	1.395
0.9176	0.98118	0.98312			0.526651	0.76911	0.73099	1.09077	0.63427	0.67324	2.34214	1.52863	1.11017	1.69171
1.3495	0.89721	1.50198			0.61391	0.64045	0.59106	0.66689	0.71581	1.54875	0.60275	1.54134	1.44062	2.03354
2.17472	2.2761	1.11453			0.779853	0.60572	0.61777	0.65468	0.57617	0.70384	0.61512	1.67695	1.33833	1.50143
1.1664	2.36005	0.89824			0.673689	0.60692	0.77962	0.89519	0.82127	1.0233	1.07831	1.59876	1.17231	0.6509
1.04969	0.69156	0.84173			0.497435	1.65442	0.83295	0.75101	0.79474	0.69773	1.02581	1.18489	1.60172	1.54971
0.78242	0.85901	1.73679			0.809065	1.13222	0.87741	0.78499	0.80435	0.73304	0.95831	1.69735	1.47758	1.40922
0.91637	1.31811	1.14417			0.578438	0.76041	0.89573	0.51722	0.47072	0.92173	1.54681	1.56066	1.75958	1.82553
1.15759	0.74754	0.7396			0.290643	0.73019	0.96237	0.74845	1.112	0.69669	0.60487	1.30339	1.75872	1.46983
0.87263	0.87038	0.89162			0.833535	0.85124	1.04815	0.81261	0.92399	0.79851	0.6761	0.27396	1.78335	1.46091
[truncated: 5,314 more rows]

## Sheet: Figure 4b
				NAD-Snifit Cytosol		values represent the emission ratio													Treated Data
																				Control			NMN			NR			Rotenone			6-AN
Control 1	Control 2	Control 3	NMN 1	NMN 2	NMN 3	NR 1	NR 2	NR 3	Rotenone 1	Rotenone 2	Rotenone 3	6-AN 1	6-AN 2	6-AN 3				min	0.597994	0.593187	0.602786	0.55164	0.546936	0.603529	0.537485	0.534367	0.530725	0.250197	0.259182	0.246691	0.48169	0.452805	0.43485
0.82787	1.04201	1.09408	1.08125	1.15754	0.97032	1.06464	0.86789	1.04605	0.244783	0.932825	0.28027	0.90371	0.92427	0.93482				25th	0.892845	0.88853	0.892103	0.84186	0.843603	0.876405	0.83735	0.844305	0.84355	0.613914	0.611017	0.628482	0.73129	0.71106	0.68961
1.00549	0.95426	1.13439	0.85544	1.09563	1.03248	0.97683	0.73748	1.11047	0.795843	0.862628	0.9576	1.3262	0.75076	0.79503				median	1.00151	0.99698	1.00126	0.949675	0.95009	0.97591	0.94718	0.961135	0.95937	0.739741	0.730671	0.758913	0.82184	0.807525	0.78812
1.1573	1.03894	1.17097	0.96728	0.97556	0.93845	0.89944	1.02298	0.8953	0.494733	0.901009	0.405494	0.88538	0.78398	0.9023				median	1.00151	0.99698	1.00126	0.949675	0.95009	0.97591	0.94718	0.961135	0.95937	0.739741	0.730671	0.758913	0.82184	0.807525	0.78812
1.04838	0.96147	0.94356	0.95608	0.91694	1.34588	0.54337	0.89193	0.84347	0.825847	0.683169	0.665152	0.97794	0.63119	0.75945				median	1.00151	0.99698	1.00126	0.949675	0.95009	0.97591	0.94718	0.961135	0.95937	0.739741	0.730671	0.758913	0.82184	0.807525	0.78812
1.03113	1.21323	0.78647	1.33422	0.9471	1.03379	0.744	0.91458	1.0009	1.00717	0.705496	0.3692	0.85671	0.91779	0.58116				75th	1.08941	1.08543	1.08498	1.03534	1.04138	1.05832	1.03726	1.05093	1.0521	0.856392	0.845574	0.883009	0.89769	0.88323	0.85945
0.70768	1.08684	0.89094	0.79488	0.93058	0.8428	0.9082	0.57884	0.56029	0.853534	1.11941	0.938636	0.76772	0.58825	0.74345				max	1.38426	1.38077	1.3743	1.32556	1.33805	1.3312	1.33712	1.36087	1.36492	1.22011	1.19741	1.2648	1.14729	1.14149	1.11421
1.115	0.94241	0.98311	1.11554	0.99681	1.25795	1.06917	0.95337	1.09762	0.737565	0.818966	0.912887	1.11575	0.9022	0.78257
1.32541	1.13899	0.98212	1.17617	0.49691	1.05456	1.01444	0.88386	0.95693	0.993177	0.80951	0.80133	0.95818	0.76022	0.58077
1.22702	0.93066	0.86456	1.02472	0.96803	0.98149	0.89983	0.90379	0.95286	0.770604	0.247195	0.603009	0.66604	0.6426	0.82161
1.10085	0.90779	0.94414	0.7877	0.56528	0.7908	1.11156	0.92158	1.08275	1.29281	0.74553	1.35095	0.9726	0.48868	0.77105
0.73506	0.97243	0.9177	1.15256	1.02005	0.89307	1.04878	0.99567	0.98627	0.72452	0.639337	0.885773	1.05006	0.86512	0.60128
0.78018	1.09456	1.04592	1.03252	1.0196	0.98735	0.97622	0.72985	1.14612	0.89231	0.761465	0.59142	0.89614	0.43851	0.70107
1.20313	1.31924	1.03533	0.78688	1.13585	0.97591	0.90299	0.79505	0.74161	0.907282	0.841289	0.941132	0.95449	0.9615	0.90025
1.05655	0.90395	1.23983	0.82885	0.71576	1.28879	0.74547	1.09838	0.8123	0.488953	0.61725	0.803384	0.82456	0.86699	1.1254
0.89169	1.24715	1.22841	1.00433	0.8775	1.06388	1.10779	0.68633	0.58315	0.67135	0.513926	0.560209	0.96749	0.91511	0.87883
0.6674	1.19715	0.62403	0.91716	0.89515	0.9685	1.09813	1.12173	0.8665	1.02038	0.564579	0.708583	0.84686	0.76114	1.22464
0.97288	0.79843	0.84151	1.07495	0.49823	0.7398	0.89746	1.01836	0.87677	1.08438	1.27306	0.741742	0.92806	0.95173	0.62559
0.84641	1.12764	0.91006	0.53134	1.06868	0.99936	0.92834	1.35802	1.03388	0.697313	0.822161	0.782211	0.83151	0.89579	0.87319
1.08279	0.87356	1.11366	1.06799	0.92877	0.89925	0.89132	1.12022	0.88867	0.731311	0.61228	0.76476	0.77685	0.82093	0.7328
0.86944	1.09572	0.94684	0.98321	1.03238	1.05803	0.89959	0.99029	0.93058	0.334812	0.864898	0.843436	0.62155	0.88793	0.48402
0.97656	1.10058	0.64465	1.03119	1.01051	0.95035	0.5922	0.76364	0.95028	0.794125	0.925431	0.329275	0.89325	1.00445	1.00707
1.17626	1.16949	1.01352	0.93172	0.93216	0.39897	1.3626	0.85588	0.81085	1.47134	0.773479	0.895307	0.9435	0.8279	1.04459
0.98814	1.0719	1.06189	0.98869	0.89975	1.12601	0.91112	0.97929	1.00118	0.81648	0.85574	0.83899	0.57529	1.00256	0.99074
0.77725	0.98962	1.03465	1.10825	0.95209	0.72716	1.04276	0.99062	1.09949	0.580362	0.791967	0.599518	0.78065	0.82497	1.04958
1.13757	0.99885	1.02982	0.89858	1.04647	0.99839	1.16059	0.79187	1.09165	0.806639	0.929355	0.861604	0.78488	0.80823	0.94606
0.81974	1.02573	0.88935	1.23735	0.98481	0.65856	1.04803	0.82395	0.89186	0.578227	0.713008	0.774128	0.58543	0.90556	1.02513
0.76793	1.0326	1.01817	1.11588	0.73679	0.61834	0.99221	0.84976	0.82595	0.825852	0.467625	0.564621	0.74926	0.65683	0.99197
0.47089	0.98208	1.01098	0.94114	0.91668	1.1132	1.0741	0.94164	0.83338	0.818937	0.975918	0.442683	0.83996	0.89864	0.80724
1.12095	1.0055	1.12913	0.93255	0.80533	0.95959	0.91325	1.06281	0.81079	0.580683	0.756017	1.01206	0.82704	0.70941	0.5112
0.97708	1.18777	1.07794	0.9279	0.99301	1.33975	0.99086	1.03508	1.12195	0.973084	0.697249	0.367693	0.77382	0.90686	0.56143
1.01432	0.99451	1.04797	1.60305	0.96005	0.99966	0.84071	0.93613	0.88866	0.832165	1.00002	0.582126	0.72499	0.61404	0.79262
1.13039	0.94931	0.91899	0.90463	0.82981	0.87626	0.8284	1.11749	0.99894	0.382788	0.635879	0.931398	0.94923	0.60495	0.87788
1.16011	0.99569	1.13818	0.63673	0.82195	1.05175	0.95897	0.82143	0.83339	0.566989	0.751342	0.541783	0.82146	0.85083	0.5259
1.03402	0.99996	0.988	0.95356	0.94565	1.03666	1.27252	0.89178	0.86015	0.555819	0.624682	1.46298	0.75668	0.9396	0.80886
0.97959	1.04316	1.03456	0.71933	1.1639	0.96259	0.8154	0.91527	1.06834	0.571725	0.54915	0.883009	1.04267	1.16442	0.90446
1.41057	0.90797	0.87901	1.06623	1.05558	0.94851	1.10013	1.08479	0.92728	0.870339	0.845546	0.86513	0.87557	0.88037	0.98555
1.00248	1.10862	0.72237	1.10778	1.07852	1.19263	1.05463	0.75756	0.94201	0.724616	0.758556	0.889828	0.47286	0.85205	0.89127
1.00629	1.10601	1.1075	0.94175	0.91084	0.78767	0.77642	1.00379	0.99253	0.458947	0.790253	0.568069	0.85346	1.11926	0.85123
0.87756	0.98885	0.8239	0.8734	1.06673	1.06953	0.90468	0.97328	0.78402	0.838859	1.15616	0.828389	0.98793	0.59975	0.90179
1.01981	0.73139	1.06039	1.0358	0.83437	1.00189	1.09042	0.98507	0.85631	0.55393	0.782503	1.10431	0.74563	0.78276	0.72253
0.47448	1.03711	1.1201	0.54115	1.12587	0.95743	0.81559	0.99512	1.15117	0.658025	0.619908	0.606198	0.73206	0.77311	0.74221
0.96017	0.92656	1.0747	0.84741	0.91777	1.04626	1.06493	0.76929	1.29962	0.874351	0.407506	0.741909	0.75517	0.82488	0.66803
1.09926	0.96324	0.36864	0.98485	1.02001	0.78912	1.05058	1.05927	1.02834	0.511205	0.968477	1.00872	0.85052	0.8389	0.82642
1.02631	1.0335	1.06184	0.89551	0.9485	1.11681	0.96298	0.88093	1.0524	0.847508	0.455572	0.58991	0.81365	0.87776	0.97129
0.82212	1.32832	0.84818	1.05014	1.14286	0.84956	0.81631	1.29523	1.09048	0.707949	0.657594	0.37836	0.82082	0.8706	0.88795
0.98349	0.6782	1.0123	1.00167	0.78635	1.18756	1.12687	0.9946	0.60711	0.717952	0.808752	0.581541	0.86679	1.0772	0.86537
1.13552	0.99246	0.85935	1.07119	1.09531	0.93588	0.98436	0.90172	0.71298	0.885335	0.575571	0.55329	0.85819	0.82408	0.93802
0.99749	0.97497	1.09553	0.77309	0.87102	1.02346	0.96158	0.8981	0.87481	1.45777	0.822048	0.445896	0.71549	0.82672	1.22099
0.66554	0.78221	0.95874	0.87949	1.0507	0.6404	0.88982	1.18596	0.85122	0.950509	1.18261	0.737677	0.69583	0.89353	0.97839
1.06531	0.83854	0.82071	0.88256	0.4648	1.19255	0.92616	1.54867	0.59096	0.567722	1.01374	0.917288	0.74064	1.13112	0.78146
1.03128	1.01109	0.68183	1.03861	1.07773	1.16962	1.0115	0.76857	0.98215	1.04364	1.56697	0.628732	0.84898	0.93017	0.65759
0.88168	0.84728	0.98652	0.90913	0.9755	0.95187	0.93857	0.77909	0.98649	0.702918	0.827229	0.753253	1.11783	0.91216	0.53598
0.91383	1.11912	0.88187	1.17343	0.77961	0.96936	1.04559	0.9945	1.07979	0.471689	0.474506	0.59063	0.88673	0.68649	0.70973
1.04838	0.99072	1.21625	0.80989	1.12578	2.16831	0.94959	0.848	0.78927	0.767735	0.791757	0.103332	0.86729	0.43725	0.41672
0.94682	1.14203	1.09641	1.15897	1.20173	1.18256	1.11832	0.72462	1.12043	0.52567	0.636791	0.831645	0.6608	0.64309	0.82612
0.67796	0.36352	0.90471	1.02681	0.74185	0.84683	0.92675	0.76483	0.94841	0.730239	0.744291	0.772932	0.96315	0.95201	0.52459
0.96914	0.93055	0.9012	0.83997	0.82868	1.00475	1.03421	0.91152	0.75942	0.663383	0.582686	0.877692	0.97287	0.90663	0.75363
1.37032	1.07941	1.12306	1.02705	0.8597	1.03592	0.98548	1.06577	0.8529	0.224651	0.695026	0.695209	0.94593	1.12855	1.08341
0.78857	0.84528	1.074	1.03364	1.00169	0.96322	0.89047	1.16071	0.79285	0.814574	0.978328	0.277226	0.93576	0.92518	0.66628
1.11655	1.00511	1.01515	1.16222	0.99779	0.93118	0.96012	0.76516	1.06347	0.826647	0.793892	0.984409	0.96203	0.8268	0.86037
0.90315	1.053	1.27262	0.75809	1.01371	0.9635	1.00396	1.10709	0.83439	0.757845	0.731711	0.640426	0.77585	0.81093	0.677
0.8693	1.03731	0.90011	1.09576	0.84596	0.92921	0.69891	0.96709	0.93379	0.591997	0.47387	1.33769	0.67528	0.75711	0.71242
1.07009	1.03553	1.1121	0.91364	0.99287	0.81972	0.97394	1.16283	0.88678	0.662108	0.850797	0.709272	0.78432	0.6125	0.81076
0.92917	1.11967	0.92549	1.02098	0.62601	0.85758	1.02015	0.90638	0.91582	0.604967	0.663345	0.571486	0.60257	0.67566	0.86357
1.16809	0.95359	1.18231	1.06504	0.91786	0.76206	0.74823	0.58803	1.08727	0.980635	0.924565	0.725559	0.53288	0.84548	0.68251
1.13812	0.98159	0.899	0.73702	1.06291	1.01174	0.83438	1.0881	1.1892	0.74685	0.805082	0.923979	0.88657	0.6618	0.83828
1.28277	0.89445	1.29667	0.979	0.82553	0.98784	1.02268	0.98378	1.09684	0.664318	0.955639	0.950486	0.89933	0.75584	0.91023
0.9929	0.98047	0.9437	1.4077	0.97493	0.97935	1.02166	0.6741	0.51455	0.658557	1.29427	0.83273	0.90733	0.78619	0.77916
0.67637	1.18701	1.12065	0.91079	0.97548	1.06987	0.8401	1.03936	0.86818	0.896037	1.00096	3.02425	0.57394	0.93726	0.76651
1.09962	1.1214	1.12917	1.19435	0.82001	0.97289	0.99937	1.05694	0.96134	0.876707	0.528662	1.10496	0.61373	0.82506	0.84611
0.84484	0.95394	1.25687	1.04334	1.07686	1.0454	0.92588	0.56327	0.89945	1.15256	0.588782	1.16713	1.04854	1.12637	0.8891
1.02986	1.10773	1.08355	1.24966	0.78872	0.91301	0.84174	0.75489	0.76555	0.838111	0.745248	0.890151	0.97497	0.77618	0.93437
1.17295	0.92661	0.90519	0.8709	1.08669	0.78992	1.00944	0.78751	1.06453	0.748651	0.798897	0.644318	0.69826	0.8572	0.73535
1.14565	0.93567	0.95002	1.06714	0.82393	0.75946	0.96886	0.96111	0.66417	0.771118	0.684818	0.776727	0.92919	0.89764	0.90183
1.03555	0.92519	1.0203	0.97381	0.99354	1.00351	0.6775	1.17412	0.98753	0.425289	0.643608	0.8988	0.82916	0.81926	0.80691
0.9651	1.05842	0.87613	1.08164	1.06675	0.40081	1.03861	1.08527	0.99586	0.93196	0.55141	0.858286	0.81177	0.91452	0.76381
0.92994	1.17803	0.84971	0.9207	0.95164	0.9901	0.97993	0.67651	0.81037	0.72291	0.90586	0.890735	0.53922	0.92843	0.90122
0.88161	2.21487	0.86458	0.67778	0.81038	1.22895	0.97544	1.05823	1.07114	0.582575	0.758685	0.419646	1.18288	0.82594	0.86529
1.19761	0.99048	0.99149	0.89767	0.97798	0.84861	0.79178	0.99202	0.90428	1.09857	0.890238	0.737341	0.80217	0.91963	0.8077
0.89268	1.14943	0.55716	0.91167	1.05901	1.13629	0.77045	0.84288	0.40737	0.595627	0.599162	0.421453	0.95547	0.80114	0.88059
1.07891	1.2558	1.02604	1.09447	0.88934	0.71343	1.0499	1.08744	0.75139	0.54252	1.0891	0.799808	0.90341	0.79606	0.49135
0.75241	1.25347	0.98356	0.90694	1.11284	0.75304	0.8919	0.84993	0.99046	0.671314	0.680463	0.683349	1.00842	1.00391	0.55715
1.02042	1.00583	2.07304	1.11335	1.09968	0.96692	1.02487	0.72355	0.81217	0.91819	0.687764	0.988742	0.53184	0.88327	0.83765
0.88086	0.69022	1.03798	0.97129	0.87343	0.75351	0.97776	1.11484	0.82285	0.720422	0.705683	0.670952	0.81582	0.97599	0.77974
1.05296	0.88542	0.7768	1.28593	0.82906	0.72781	1.0688	1.10306	0.85246	0.544995	0.645458	1.14281	0.69026	0.89594	0.50708
0.69572	1.13358	0.85754	1.15693	1.10287	0.96583	0.94059	1.01268	0.8388	0.90888	0.827321	0.512043	0.84431	0.85748	0.82714
1.0905	1.05873	0.54238	0.93086	1.00696	0.9578	0.8951	0.63399	1.12319	0.768788	0.88218	1.07757	0.49148	0.80712	0.89512
1.07017	1.35802	0.98529	0.7214	1.03848	1.32104	0.99293	1.14235	0.87388	0.944728	0.987944	1.4882	1.05309	0.87475	0.80049
0.98307	0.8399	1.03266	0.9921	0.78578	1.16833	0.75877	1.00791	1.20588	0.598022	0.747611	0.570166	1.06379	0.87449	1.01229
0.90037	0.75259	1.08497	0.75711	1.52317	1.0892	0.65846	1.00098	0.92455	0.898398	1.39625	0.683212	0.67337	0.51812	0.9023
0.94262	1.00172	1.09435	0.6592	0.52233	1.04124	1.02702	0.84357	1.01295	1.71476	0.9269	0.92895	0.74117	0.4094	0.92872
1.0009	0.79511	0.63449	0.75028	1.00121	0.91176	1.12396	0.91131	0.63357	1.38058	0.735578	0.880397	0.89457	0.76097	0.79358
1.29526	1.12262	0.94764	0.853	1.25488	0.99466	1.11397	1.24877	0.93795	0.580488	0.591311	0.607107	0.8025	0.47306	0.87948
1.03551	0.95547	1.11428	1.02356	1.00044	0.9113	0.93354	0.82708	0.84937	0.73418	0.863079	0.876271	0.98987	0.79473	0.68692
0.8377	1.06273	1.07193	1.028	0.58147	1.01392	0.7951	1.05143	0.99742	0.356389	0.819781	0.596599	0.95557	0.88307	0.70378
0.90038	0.92577	1.07097	1.01275	1.03896	1.3321	0.779	0.73302	0.98248	0.647516	0.85607	1.3339	0.54261	1.03202	0.82914
1.18778	0.90792	1.0989	0.93516	0.93062	0.63589	0.96855	0.98772	1.0031	0.744621	0.796651	0.465012	0.91498	0.53895	1.0069
1.06934	0.69289	1.06503	0.97557	0.98714	0.96741	1.03374	0.9066	1.01268	0.721211	0.711313	0.442282	0.94543	0.9179	0.89245
0.95993	1.08273	0.93069	1.26352	0.60668	0.62603	0.95324	0.92593	1.00243	0.701803	0.607212	0.684009	0.91799	0.87941	0.99213
1.00758	1.03114	1.01846	1.22264	0.92362	1.06853	0.93294	0.86069	1.09465	0.559627	0.243174	0.701451	0.89007	0.76354	1.09788
0.88898	0.93442	0.90332	1.01541	0.7996	0.9541	0.9568	0.8988	0.88184	0.743803	0.814395	0.785513	0.76423	0.57015	1.10676
1.07365	0.65002	0.93036	0.95755	0.84693	0.41804	0.61403	0.71707	0.85187	0.903873	0.816502	0.476579	0.84635	0.32549	0.82531
0.72641	1.09843	1.07686	1.09053	0.79992	1.02211	1.18943	0.73523	1.11432	0.728828	0.81935	0.624764	0.84581	0.88108	0.90403
1.05355	0.88572	0.8885	1.06783	0.9473	1.03125	0.91649	1.10813	0.8045	0.665699	0.73977	0.998266	0.62675	0.84153	0.87274
0.99292	1.28021	0.80646	0.96062	0.68814	1.04944	1.07088	0.94527	0.93888	0.920967	0.806118	0.833178	1.2369	0.77135	0.82677
0.87296	1.14234	1.22041	0.60837	0.92296	1.11193	0.69143	0.93806	0.92795	0.501237	0.739389	0.620459	0.79482	0.75597	0.77295
0.84599	1.08407	1.22603	1.06278	0.99927	0.95312	0.68177	0.70248	0.93287	0.772783	0.80839	0.831011	0.98715	0.88431	0.88616
0.87045	0.93842	0.66496	0.8164	0.66213	0.97678	0.91604	1.1252	0.64174	0.919428	0.609376	0.718004	0.81881	0.9204	0.3418
0.94577	1.03685	1.00979	0.98547	0.9186	1.0455	0.91573	1.07842	0.84189	0.934206	0.6572	0.788831	0.99358	0.82514	0.48408
0.83529	0.98269	1.08727	1.10362	0.94081	1.15069	0.93632	0.74362	0.58378	1.20999	0.561879	0.613222	0.71116	0.82312	0.97929
0.98981	0.91293	1.06699	1.1368	1.03964	0.91611	0.91359	0.53381	0.84959	0.847977	0.823247	0.605567	0.73201	0.74913	0.98554
0.996	0.87671	1.12115	1.03052	1.05677	0.91338	0.9092	1.01384	0.86841	0.678703	0.687037	0.608963	0.42529	0.88684	0.79813
1.1071	0.8079	1.10829	0.99672	0.95006	1.05815	1.02475	0.94641	1.07085	0.79978	0.939627	0.818871	0.68685	0.95134	0.68504
0.9311	1.10819	1.02027	0.8294	0.97819	0.90424	1.10262	0.78944	1.01238	0.821343	1.04897	0.822755	0.81823	1.08302	0.68063
1.02003	1.17364	1.10701	1.09639	1.09769	0.93685	1.03118	1.18859	0.89684	0.330617	1.36175	0.984175	0.77485	1.00543	0.85306
1.08378	0.85601	0.803	1.04077	0.65132	1.18637	0.90256	1.01633	1.21037	0.767169	0.618164	0.544434	0.5742	0.81364	0.88955
0.45668	0.71455	1.01509	0.89469	0.94715	1.22807	1.03489	1.13201	0.97768	0.709242	0.245393	0.667089	0.49877	0.63495	0.95033
1.03168	0.94638	1.03267	0.82054	1.02958	1.09849	1.04793	0.93256	1.06559	1.13744	0.875615	0.860351	0.7616	0.88898	0.90169
1.06892	1.14881	1.07398	0.89807	1.0344	1.18384	1.03639	1.09058	1.07495	0.758937	0.430685	0.387446	0.78995	0.66571	0.76176
0.95202	1.01029	0.98745	1.13236	0.99737	1.08072	1.03288	0.78175	0.7645	0.201854	0.864419	0.607119	0.6652	0.73529	0.80021
1.11002	1.04266	1.38543	1.2373	1.05808	0.98899	0.85737	1.10978	0.77309	0.821263	0.775884	0.360698	0.77302	0.94991	0.58304
0.99611	0.94156	1.03514	0.90999	0.8637	1.05038	1.10036	0.75524	1.02586	0.910591	0.767884	0.682339	0.84424	0.83311	0.57406
0.85237	0.6615	0.96144	0.93581	0.89541	0.98082	1.00725	0.98494	1.1188	0.80288	0.684558	0.376197	0.68772	0.60119	0.97876
0.62081	1.06614	1.06746	1.11452	0.97407	1.12914	1.06671	0.99106	1.06452	0.740938	0.59178	0.585564	0.97115	0.84358	0.75165
1.1473	1.14713	0.78842	1.01145	1.03718	1.00381	0.9664	0.9285	0.6714	0.81115	0.905572	1.46476	0.88517	0.69167	0.90781
0.7921	0.80194	1.07114	1.16949	0.59124	0.99386	0.90968	0.96507	0.89667	0.52309	0.751304	0.887118	0.659	0.9644	0.85666
1.06826	0.9845	1.06684	0.98551	0.94375	1.11715	0.80572	1.00766	0.45731	0.848667	0.741031	0.218531	0.47698	0.83655	0.72182
1.12286	0.97279	1.12592	1.05383	0.99098	0.69325	0.71292	0.98869	1.18531	0.74783	0.51475	1.16758	1.18296	0.67999	1.03759
0.88016	0.80848	0.91203	0.69687	1.0235	0.87653	1.09379	0.92606	0.9587	0.843984	0.725689	0.745027	0.7749	0.88242	0.8125
1.02057	0.75954	1.1356	1.03244	0.81804	1.11323	1.13551	0.59926	0.78155	0.672119	0.986517	0.950619	0.88009	0.82683	0.65564
0.90703	1.15227	1.01096	0.60928	0.9629	0.63926	0.77586	0.99044	0.939	1.20315	0.626122	0.860535	0.99379	0.70257	0.88259
1.04898	1.07368	0.99317	1.09509	0.82144	0.97262	0.91191	1.06909	0.84694	0.955302	1.01889	0.917972	0.74551	0.80633	0.74879
1.008	1.14857	1.08944	0.8438	0.94752	1.04309	0.65252	0.91082	0.97402	0.855245	1.02619	0.885929	0.80877	0.75985	0.72109
0.91477	0.88084	1.03175	1.12923	0.67326	0.76904	1.00294	1.06943	0.97579	0.718219	0.848235	0.681633	0.63485	0.95164	0.95149
0.93052	1.1707	0.93711	1.22274	0.9188	0.86658	0.93535	0.92371	1.15106	1.06465	0.611972	0.789137	0.69004	1.01297	0.82203
0.92325	0.70442	0.95508	1.11968	1.05723	0.74094	0.9297	0.96413	1.11222	0.487008	0.619766	0.799816	0.57355	0.71062	0.66213
0.93259	0.68176	1.15579	0.91401	0.84033	0.98777	0.89169	0.90493	0.29941	0.731484	0.843478	0.490199	0.85877	0.77886	0.97798
1.15168	1.01065	1.08195	0.72738	0.70929	1.09038	0.73673	1.02949	0.99835	0.888995	0.546633	0.696111	0.62209	0.69284	0.88125
0.96785	1.01174	1.03488	0.7103	1.32894	1.23596	0.87132	0.94087	0.82255	0.63025	0.873565	0.698318	0.76415	0.66125	0.74934
0.50205	0.90003	1.04587	0.94236	1.04384	1.11814	0.99064	0.80233	1.15552	0.72026	0.821147	0.584698	0.92832	0.9274	0.38304
0.96771	1.02552	1.02013	1.00809	0.69515	1.23071	0.94363	1.15989	1.15034	0.989151	0.566083	0.888915	0.80054	0.99822	0.74306
1.07568	1.0434	0.8505	0.93969	1.04022	0.88582	0.87639	1.01133	1.18713	0.813355	0.660825	0.82617	0.97074	0.83683	0.85868
1.52331	1.21314	0.94097	0.86929	1.01006	0.67424	0.77763	1.13161	0.75575	0.549012	0.89553	0.670341	0.81203	0.93394	0.86392
1.14781	1.09171	0.92644	0.77024	0.66772	1.08326	0.86361	3.38724	0.92343	1.13111	0.716867	0.595999	0.98931	0.80969	0.33216
1.07683	0.72895	0.92487	0.91734	0.88894	0.99811	0.88567	0.59712	0.86775	0.980029	0.873284	1.20709	0.91421	0.61109	0.85349
0.88661	0.82759	1.09054	0.85395	0.91303	1.40425	1.04086	0.96999	1.08215	0.816631	0.492565	0.699017	0.82229	0.72325	0.78483
0.99266	0.78098	0.93403	0.79904	1.1231	0.98019	0.77822	0.91443	1.13302	0.720801	0.794705	0.643037	0.8449	0.76399	0.89297
0.83553	1.05334	0.87662	1.04218	1.06014	0.84654	0.83459	1.18388	1.02168	0.808844	0.436468	0.689405	0.92468	1.12187	0.59022
1.09945	0.90914	0.94676	0.27822	0.84335	1.04896	0.70718	0.64827	0.53037	0.697943	0.542398	0.775831	1.03107	0.9328	0.78316
0.98302	1.01377	0.98853	0.67147	0.83564	1.03748	0.95975	0.63171	0.91342	0.828018	0.781715	0.85117	0.77706	0.92649	0.43468
0.74493	1.09618	1.14485	0.84745	0.94313	0.87566	0.98324	0.89428	0.49434	1.06535	0.702502	0.796874	1.10004	0.80838	0.97541
1.97016	0.74371	0.86939	0.98661	1.02218	0.93771	0.95264	1.03012	1.0835	0.876385	1.00702	0.764483	0.78708	1.00572	0.68489
1.03755	1.35836	1.04672	0.8945	1.02164	0.80293	0.78588	0.95502	1.06589	0.825995	0.870093	1.03681	0.87131	0.70366	0.86995
1.02257	1.0318	0.71028	0.86643	1.01664	0.78374	1.02991	1.12089	1.11375	1.22683	0.756553	0.934093	0.76997	0.51552	0.50791
1.06295	1.05804	0.95146	0.99977	1.00334	0.86012	0.76673	0.95897	0.94021	0.660407	1.06005	0.803968	0.82117	0.55093	0.82626
1.12882	0.63362	1.02127	0.97329	0.81104	0.9554	1.124	0.84963	0.87981	1.00483	0.837782	0.943921	0.73635	0.91952	0.74892
1.09208	1.14395	1.06381	1.11566	0.97385	1.13284	0.71397	1.29312	0.99656	0.276617	0.907079	0.706228	0.79206	0.99593	0.79304
0.96172	0.83327	1.11563	0.87925	0.76208	1.00202	0.90126	1.17971	0.71251	0.973284	0.504297	0.887385	0.87728	0.77672	0.88102
1.23951	0.54024	0.91566	1.026	0.71383	1.22471	0.95784	0.98748	0.86743	0.856345	0.872127	0.89453	0.94476	0.93815	0.96306
0.68582	1.12758	1.03201	0.78473	1.07347	1.12557	1.13857	1.00888	1.06341	0.778229	0.798404	0.802927	0.96727	0.90165	0.95275
1.1177	0.96862	1.11872	0.97748	0.90585	1.50928	0.91225	0.70631	1.06614	0.558386	0.507357	0.66195	0.76959	0.84524	0.92447
0.89643	1.01287	1.07374	1.2935	0.83205	0.89292	0.79383	1.01056	0.88717	0.945899	0.790606	0.816095	0.93904	0.83836	0.73015
0.95604	0.95044	1.00477	1.19252	0.91019	1.02952	0.80443	1.1502	0.8272	1.00447	0.52137	0.540761	1.06766	0.77997	0.59308
1.28485	1.06638	1.10674	0.82372	0.82807	0.64416	0.88621	1.00074	0.95892	0.817246	0.778947	0.678831	0.93582	0.9418	0.89379
1.09472	1.10681	0.98309	0.92459	0.95073	1.06524	0.86687	1.20516	0.90988	0.527786	0.700516	0.733597	1.01217	1.045	0.52379
1.0241	0.98381	0.96895	0.87687	1.02024	1.03517	1.09172	0.65548	1.0641	0.727389	0.705431	0.809714	0.90542	1.06045	0.79608
0.72327	0.85201	0.94903	1.09623	1.29862	0.59147	0.90155	1.0303	0.68146	1.02612	0.642999	0.702495	0.91563	0.76594	0.785
0.86856	1.07539	0.37577	0.88862	1.11017	0.97059	0.96622	0.89373	0.99766	0.716408	0.624521	0.358788	0.91178	0.77141	0.79768
0.90836	0.95509	1.21812	0.64549	0.95248	0.91683	0.9263	0.76209	0.96498	0.592102	0.923708	1.00053	1.00043	0.8708	0.78541
0.78703	0.87516	0.94563	0.95809	1.06487	0.97585	0.93176	1.04616	1.01408	2.2611	0.561884	1.01029	0.98545	0.84696	0.69118
0.991	0.98265	0.8852	3.30194	0.89719	1.04168	1.01485	1.08449	0.99517	0.908022	0.708184	0.797956	0.95225	0.96507	0.90987
1.02653	0.77634	0.68434	0.9931	1.19267	1.21896	0.88773	1.05338	0.92404	0.85809	0.806381	0.736434	0.80511	0.8426	0.84185
1.03377	0.88363	1.01992	1.10654	0.97455	0.98544	0.97765	1.11115	0.91836	0.698669	0.284682	0.746286	0.89582	0.82621	0.71629
1.04628	0.77374	1.13272	0.68228	0.91766	1.03294	1.04272	1.01827	1.05766	0.897932	1.08515	0.933132	0.7903	0.75676	0.94014
1.10695	0.9678	1.27601	0.78347	0.93238	1.05717	1.01761	1.04003	1.04947	0.749709	0.80751	0.974715	0.61857	0.42343	0.91623
1.25224	1.02462	0.94936	1.01353	0.09461	0.75533	0.83115	0.63723	1.0733	0.621329	0.931631	0.976611	0.56045	0.79472	0.90791
0.66956	1.01694	1.10691	0.93307	1.0204	0.85381	0.78806	0.98635	0.96709	0.682092	0.933117	0.52301	0.89401	0.98453	0.90809
0.95267	1.14343	0.97762	0.90112	1.03035	1.12609	1.0808	0.825	1.03867	0.649002	0.722546	0.653269	0.78004	0.8922	0.67129
0.65145	0.52242	0.93542	1.22078	0.81966	0.87501	0.97867	1.05143	0.92502	0.643427	0.941881	1.00837	0.97543	1.00833	0.58196
1.04622	0.72068	1.12229	0.79615	0.85311	0.66516	0.94171	1.0168	0.99967	0.761494	0.738178	0.758903	0.90884	0.87739	0.97581
0.93968	1.05643	0.63641	0.83483	0.8574	1.17708	0.9	0.80561	0.94111	0.833214	0.490853	0.803567	0.77273	0.64518	0.87157
1.14839	1.08349	0.91457	1.20882	0.55153	0.93304	0.96613	1.03431	0.8477	0.640428	0.443168	1.00682	0.90628	0.30943	0.56431
1.19126	0.83652	0.82228	0.82061	0.88651	0.90717	0.56768	0.94584	1.14319	1.07925	0.734125	0.798746	0.8741	0.7944	0.79163
1.01714	1.18585	0.6862	1.00472	0.92558	1.29838	0.90134	1.21161	1.09443	0.783211	0.982827	0.640473	0.6541	0.87712	0.78559
0.78918	0.90165	1.1716	0.9305	0.83943	1.01735	0.58668	1.039	0.79087	0.608126	0.405906	0.729066	0.93966	0.94067	0.91935
1.06706	1.15302	0.97775	0.73063	1.26068	0.86581	0.86478	0.96762	1.02218	0.587792	0.631157	0.80663	0.82707	0.89337	0.74724
0.9627	0.95259	0.69067	0.88337	1.08194	0.80191	1.0122	1.08752	1.07993	0.817604	0.89277	0.899108	0.90044	0.8848	4.17316
1.13545	1.12552	1.28762	0.93516	0.99568	1.09665	0.96902	0.99643	0.76558	0.434236	1.14609	0.609638	0.66825	0.94715	0.80544
0.99361	0.89835	1.0032	1.03846	0.89114	0.92878	0.86987	0.89858	1.0112	0.537107	0.774302	0.831608	0.81498	0.92107	0.94911
0.86602	0.68568	1.35804	0.93861	0.67784	0.8907	0.89218	0.70114	1.13137	0.916053	0.455539	0.933851	1.00791	0.94796	0.85589
0.54956	1.20588	0.80276	1.18517	1.0253	0.97913	1.05429	0.92733	1.07656	0.851255	0.671473	0.753758	0.73011	0.82862	0.97661
1.04077	1.13648	1.15478	0.95352	1.02589	0.86195	0.87616	0.87409	0.96895	0.567783	1.07659	0.543146	0.89453	0.95861	0.59037
0.86641	0.93105	0.995	1.00123	1.10555	0.85461	1.09367	0.90889	0.77619	0.463448	0.43772	0.911386	0.94916	0.94508	0.95145
1.07077	0.91975	1.0659	1.13492	0.90489	1.19433	0.6701	1.07959	0.58727	0.646327	0.922257	0.562288	0.75426	1.04276	0.91159
1.13902	1.0492	1.15205	0.72085	0.98843	1.234	0.57917	0.7759	0.99234	0.888355	0.893609	0.689411	0.87481	1.10095	0.89194
0.91698	0.46051	0.84016	0.92583	0.88732	1.30059	0.99496	0.8221	0.80697	2.14866	0.299716	0.390973	0.62306	0.76877	0.80498
1.01015	1.15333	1.12004	0.72067	0.96142	1.10188	1.13312	0.96519	1.05567	0.705988	0.73485	0.770979	1.00797	0.98564	0.51322
0.81715	0.91018	0.88975	1.03561	1.00905	0.75115	0.72226	1.0783	0.95681	0.709248	0.633603	0.546337	0.81787	1.06698	0.79213
0.96712	1.01908	1.03105	1.24065	0.59463	0.91161	1.01783	0.97375	0.69005	0.900316	0.637355	1.02503	0.6362	0.79218	0.90744
0.87564	1.11247	0.84664	0.43624	0.96586	0.90502	0.8692	0.94281	0.92502	0.748107	0.634255	0.705471	0.86112	0.72149	0.66154
1.08935	0.74368	1.00248	1.01518	0.87789	1.05077	0.65591	0.87755	1.22739	0.708129	0.87399	0.633766	0.80001	0.82232	0.90437
1.264	1.09065	0.79102	0.93669	0.80103	0.89266	0.81778	0.80721	1	0.611595	0.856224	0.670202	0.86437	0.68889	0.72865
1.08182	0.93545	1.01348	0.81588	1.11609	0.903	0.87213	0.91082	0.54292	0.713214	0.763614	0.857733	0.80544	0.65882	0.4342
0.96145	1.0204	0.78256	0.92603	0.75052	0.91809	0.87957	1.17041	0.96624	0.734806	0.664723	1.11848	0.5742	0.73113	0.83777
0.65048	1.13096	0.98039	0.75678	1.03203	0.93303	0.91442	0.99699	1.03502	0.58891	0.933338	0.633541	0.99544	1.07937	0.87109
0.9982	1.06385	0.86644	1.12358	0.73804	0.96027	0.84921	1.09869	1.58168	0.919795	0.836223	1.10404	1.11562	0.66153	0.98214
0.78477	0.96142	0.97782	1.03277	0.91356	1.08557	0.84611	1.06708	0.81607	0.625596	0.608355	1.46565	0.86925	0.49052	0.94797
0.66644	0.91736	0.4828	0.94756	1.13706	0.89722	1.78352	1.08313	0.72291	0.337465	0.714171	0.659712	0.69585	0.89025	0.53487
1.12033	1.02865	4.06725	1.00849	0.68709	0.98936	0.95759	1.06383	1.14732	0.610671	0.747412	0.779646	0.81864	0.73906	0.70844
1.0881	0.87853	1.38115	1.02386	1.02806	0.93683	0.77378	0.80731	0.88316	0.744899	1.10887	0.679776	0.95681	0.81068	0.42389
1.14602	0.80464	1.06798	0.87176	1.11128	0.91545	0.79312	1.0746	1.0024	0.505484	0.8015	0.814698	0.81303	0.82331	0.92637
1.00596	0.94412	0.90686	1.34656	1.0317	1.07351	0.92661	1.0278	1.01887	0.856632	0.711548	0.823456	0.94256	0.77456	0.90243
0.93473	0.72306	1.0398	1.21424	1.22413	0.52833	0.72271	1.03791	1.01501	1.0026	0.464977	0.708314	0.76418	0.57522	1.13419
1.09688	1.10389	0.73382	1.00094	1.04748	0.89548	0.83452	1.00469	1.3554	0.841446	0.653984	0.750563	0.81241	0.9484	0.78757
1.06015	0.94661	1.13147	1.11284	0.91895	0.82667	1.05527	0.85746	1.09892	0.545964	0.737367	0.650635	0.77749	0.45287	0.76104
1.01359	0.80696	1.14123	0.88184	0.63821	0.73229	0.62724	1.0183	1.16539	0.742228	0.67382	0.918741	0.9675	0.9214	0.80233
1.07203	0.88873	1.14489	0.84952	1.23405	0.93756	0.89468	0.7954	1.08593	1.17795	0.800877	0.620343	1.0167	0.84695	0.79155
0.662	1.06521	0.99223	0.85841	0.77196	0.98212	1.0928	0.68024	0.89423	0.881194	3.68783	0.532616	0.86205	0.97986	0.54883
0.99313	1.0694	1.04634	0.64393	0.80729	1.0576	1.10092	1.11358	0.85257	0.802706	0.840595	1.90078	0.94856	0.94806	0.90436
1.10572	1.04621	0.85762	0.55999	0.90124	0.94602	0.88534	0.61063	1.12151	0.694589	0.94459	0.64201	0.80143	0.94123	0.80114
1.01643	1.04053	1.07559	0.98532	0.86726	1.06253	0.99118	1.01764	0.79193	1.26913	0.900446	0.0914679	0.84301	0.87173	1.05338
0.64124	1.01215	1.05678	0.72279	0.97135	0.56261	1.31911	0.83882	0.631	0.580082	0.656304	1.26391	0.64636	1.02516	0.89886
0.96904	1.04414	1.12931	0.97811	0.63397	0.88874	0.83944	0.75753	0.66509	0.776645	0.546799	0.657506	0.8548	0.38665	0.4585
0.98354	1.21057	0.92491	0.93799	0.78965	1.04459	0.91613	0.7346	1.07164	0.740247	0.652282	0.919011	1.26823	0.74431	0.7948
1.12471	0.84153	0.98382	0.86028	0.87184	0.90955	0.62694	0.80297	0.78909	0.890071	0.438501	0.42076	0.69071	0.70303	1.0624
1.05447	0.90249	1.26305	1.0387	1.01266	0.95864	1.17222	1.03497	1.04152	0.784411	0.616049	0.838507	0.80195	0.73466	0.56456
1.24668	0.7077	0.87049	0.90964	0.81114	1.03014	0.55011	0.99619	0.62361	0.186755	0.656536	0.575777	0.55553	0.93081	0.71049
1.09103	1.08335	1.07656	0.63846	1.20011	1.0854	1.11767	0.80787	0.74422	0.881051	0.576605	0.8856	0.73638	0.99473	0.66923
1.19287	0.94813	1.00467	1.00598	0.65136	1.17422	0.99936	0.7223	0.92253	0.904588	0.551987	0.387975	0.77619	0.82867	0.82992
1.07705	0.99657	0.88422	0.80461	0.58202	0.87589	0.97689	0.96486	1.03393	0.910309	0.888482	1.02356	0.84913	0.89306	0.52038
0.92426	0.99091	0.9958	0.98656	1.11516	1.13504	0.67375	1.04327	0.8532	0.969405	0.825357	0.710632	0.55167	0.88656	0.81112
1.07577	0.91555	1.29071	0.85924	0.91756	0.96263	0.69678	1.14186	0.72532	0.644834	0.68043	0.46163	0.99631	1.10384	0.85432
1.35874	1.00164	0.99851	0.89258	0.9429	1.00502	1.01197	1.01605	0.48731	0.72786	0.565763	1.24029	0.74574	0.92624	0.93286
0.83208	1.05643	0.87868	0.98921	1.12887	0.9123	1.15003	0.74027	0.96384	0.604721	0.739209	0.964566	0.98328	0.92224	0.89705
1.0553	1.05523	1.19062	1.16781	0.94604	0.41396	1.10675	1.03519	1.13062	0.782572	0.724944	1.14774	0.76545	0.82122	0.88832
0.82261	1.03123	0.88192	0.90404	1.02198	1.05349	0.8571	0.74667	0.94918	0.665759	0.766605	0.969018	0.78542	0.79177	1.00331
0.89347	0.97866	1.3786	0.93262	1.14721	1.11689	1.07343	0.69805	0.9823	0.579587	0.90303	0.697112	0.91665	0.94467	0.83248
1.195	1.11134	0.87608	1.00958	0.96927	1.15389	1.03311	0.85717	1.03987	1.04563	0.70456	0.849137	0.68335	0.96358	0.8443
0.90629	0.89785	1.22977	0.89184	0.7744	1.04742	0.9556	1.08989	0.8821	0.977417	0.696471	0.691291	0.32769	0.95548	0.92441
1.05802	1.24153	0.92816	0.7425	0.93024	0.66611	0.67859	0.79438	0.95913	1.10235	0.965373	0.669452	0.93236	0.35698	0.58306
1.09235	0.9769	0.93069	0.48042	1.04812	0.97347	0.70992	0.46224	0.82433	0.843097	0.533944	0.713824	0.78502	0.87273	0.77231
0.81368	0.80202	1.05926	1.09341	1.02759	0.92438	0.92507	0.89863	1.14538	0.648476	0.407847	0.333892	1.03927	0.78421	0.95328
1.04405	1.01684	0.99142	0.92731	0.98993	0.70606	0.98963	0.7247	1.04083	0.917544	1.02025	0.823615	0.83012	0.8865	0.66
1.14867	0.95484	0.99739	0.91463	0.82768	1.01033	0.81489	0.86943	0.86566	0.525933	0.832444	0.740631	0.80354	0.89713	0.48366
0.95249	0.98435	1.11872	1.10037	0.33482	0.93923	0.9618	0.88571	0.94346	0.393294	0.657328	0.645776	1.60765	0.89687	0.81377
0.88333	0.97931	0.947	0.86292	0.88624	1.07368	1.05552	1.03926	0.93664	0.760774	0.562897	0.490144	0.85362	0.85241	0.79508
0.88326	1.04687	0.97678	0.69949	0.93711	1.0977	1.01218	1.11846	1.07123	1.08308	0.419253	0.464326	0.88595	0.88247	0.7418
0.79736	0.99417	0.84434	0.92127	0.92541	0.82647	1.02347	0.40272	1.05485	0.844866	0.333898	0.688675	0.7011	0.69417	0.74538
1.21574	0.9513	0.8936	1.23294	0.69592	0.92315	0.52734	0.84419	1.27048	0.696474	0.655427	0.941838	0.88859	0.79912	0.63619
1.09833	0.94929	0.89807	1.05597	0.82813	1.15073	0.99643	1.11276	0.99602	0.754242	0.4311	0.588089	0.89944	0.91635	0.72113
1.00302	1.06941	1.1025	0.85756	1.06739	0.96825	1.035	1.14387	0.7717	0.660061	0.856737	0.779106	0.56846	0.81302	0.79787
1.05697	1.03075	0.86985	0.89735	0.90783	0.95448	1.11094	1.03265	1.01297	0.471184	0.750632	0.805452	0.95246	0.75277	1.10019
1.1625	0.94249	1.01795	0.94707	1.00502	0.9517	0.93084	1.17234	0.76097	0.658962	0.7692	0.961407	0.76033	0.94305	0.95538
0.71892	0.88882	0.88584	0.96847	0.99214	1.10808	1.18728	0.94581	0.92744	0.700761	0.730629	0.628235	0.84641	0.35826	0.95714
1.1347	1.05087	1.07997	1.13382	1.02406	0.77265	0.74255	1.17033	0.82217	0.836111	0.585499	1.00946	0.78628	0.7342	0.88098
1.02997	0.97197	1.08086	1.19124	0.94371	1.06842	1.14311	0.74869	0.87674	0.88414	1.43713	0.772194	0.34502	0.76197	0.77692
0.30962	0.89181	0.84105	0.80652	0.82474	0.82627	0.9688	1.09774	0.82328	0.613372	0.530748	0.673616	0.76368	0.59344	0.856
0.97229	0.9481	0.80219	1.35014	0.74273	0.89124	1.09536	0.78628	1.04665	0.988281	1.07502	1.16442	0.72962	0.95932	0.95042
1.09754	0.99363	1.19941	0.46541	0.98636	0.82259	0.80202	1.25509	1.00387	0.541072	0.731248	0.633974	0.91762	1.04303	0.78979
0.85065	0.9835	0.67792	0.93926	0.91459	0.95534	1.13407	0.99358	0.83419	0.651364	0.598916	1.71724	0.88446	0.84323	0.8311
1.14216	0.78089	1.04529	0.8698	0.9749	0.65248	0.64042	1.17725	1.15288	0.759485	0.867604	0.835634	0.7185	0.82217	0.76959
1.18256	1.05137	0.90303	0.99518	0.9495	1.1573	0.92846	0.99651	1.12103	0.653285	0.641381	0.640901	0.68282	0.68998	0.80774
0.74452	0.79469	1.22199	1.0441	0.95655	1.14854	0.80048	0.972	0.95789	1.0266	0.686257	0.958206	0.91479	0.60625	0.74282
1.24107	0.83594	0.97163	0.92158	0.86569	1.03807	0.72511	0.96117	0.7719	0.800225	0.40284	1.71837	0.47626	0.82131	0.89946
0.98236	1.07419	0.76873	1.04497	1.05213	1.1385	1.08975	1.08566	1.05655	0.738869	0.721264	0.994121	0.7019	0.84144	0.74794
0.86053	1.03948	1.04361	0.5128	1.1071	0.97798	1.29615	1.05213	1.02383	0.67806	0.806708	1.11944	0.87507	1.01738	0.87724
0.9176	0.58192	1.16924	0.79581	0.86166	0.8957	0.68278	0.67924	1.05713	0.54657	0.751404	0.741399	0.99957	0.91424	0.95172
1.00185	0.81835	0.87637	1.04228	1.07716	0.97496	0.68994	1.10584	0.92973	0.344244	0.604978	0.97174	0.97087	0.56833	0.84884
0.91898	0.80994	1.0153	0.92955	1.06536	0.4995	1.00372	0.97176	1.1501	0.838226	0.781009	0.819446	0.91813	0.91448	0.50643
0.88926	0.84105	0.83252	0.69235	0.81516	1.01638	1.00421	0.69337	1.04514	0.754449	0.5323	0.707221	1.00588	0.92234	0.55804
1.04872	1.0561	0.94653	0.88394	0.9969	1.1007	0.97127	1.0856	1.08936	0.772301	0.451506	0.451665	0.87745	1.05291	0.4879
0.99768	1.46059	1.04746	1.16757	0.79879	0.88798	0.51777	1.01999	0.42764	0.329806	0.355754	1.47372	0.846	0.86709	0.79094
1.16491	0.89692	1.01637	0.79333	1.10282	1.12527	1.20888	1.02926	0.41517	0.844993	0.879623	0.940399	0.90314	0.79035	0.73509
0.89236	1.01877	1.28464	1.04285	0.99904	0.74192	0.51732	1.11575	1.02221	0.64798	0.949748	0.682963	0.79186	0.54736	0.77919
0.90737	0.79463	0.95521	0.9527	0.96065	1.15931	0.94167	0.97046	0.80302	0.648911	1.15148	0.641002	0.89131	0.77664	0.92752
0.72469	1.1213	1.02936	0.99157	0.76567	1.07115	0.7968	0.82667	0.86414	0.813027	0.652681	0.817651	0.72448	0.64413	0.84454
1.27089	0.74064	1.22387	0.89352	1.04132	1.02951	0.98234	0.80053	0.87653	1.21853	0.685017	0.714125	0.44467	0.75363	0.83848
0.64388	0.79804	0.68368	0.89506	0.69902	0.80942	1.01744	0.76763	0.9391	0.602978	0.393133	0.393426	0.79026	0.9848	0.79601
1.02444	0.91327	0.98354	0.94427	0.7524	0.97959	1.10674	0.83226	0.79842	1.00007	0.797046	0.752582	0.49757	0.61917	0.8982
0.7805	1.0523	1.10773	1.1174	0.82742	1.01171	0.81219	0.99638	0.80802	0.980207	0.842697	0.726594	0.87584	0.94853	1.04306
0.98384	0.86652	0.9632	0.98514	1.01428	0.81012	1.04819	1.05073	0.7118	1.15592	0.405132	0.867326	0.98014	0.73878	0.72566
0.71789	1.05318	0.7957	0.91296	1.04961	1.03816	0.88955	1.07711	0.98795	0.793893	0.75836	0.764249	0.46703	0.74557	2.25453
1.10469	0.95813	1.06415	0.95291	0.97304	1.11841	0.74304	0.6411	0.73982	0.745707	0.882537	0.308346	0.86892	0.64845	0.75221
0.66666	0.96098	1.08377	0.99586	0.87935	0.86529	0.97987	0.67861	0.73072	0.821107	0.932812	0.492002	0.91481	1.03625	0.71464
0.7188	0.82402	0.9641	1.03235	1.10776	0.81671	0.86239	1.04112	0.63537	0.80992	1.03707	0.734241	0.91277	0.6233	0.87947
0.22996	1.12542	0.8615	0.99611	0.85495	0.90746	0.60167	1.08484	0.84119	0.403747	0.76365	0.88872	0.29161	0.64726	0.90879
1.0173	0.6393	1.00626	0.42866	0.92664	1.01587	1.0051	0.99984	1.04937	0.780246	0.508539	1.01823	0.85232	0.84366	0.76421
1.03691	0.99188	0.93401	0.73513	0.93799	0.74656	1.11861	1.06326	1.00737	0.79692	1.15577	0.540774	0.81448	0.5852	0.5412
1.02375	1.19442	0.80362	0.60836	0.71328	1.25928	0.85154	1.02	0.72418	0.751259	0.464691	0.832209	0.84478	0.508	0.72966
1.1046	0.7723	1.04689	1.243	0.90197	0.8959	1.15847	0.85144	0.96608	0.844702	0.825401	0.804258	0.93076	0.79334	0.84826
1.06768	1.03612	1.02096	0.8891	0.99634	1.00119	1.0843	0.66133	1.36049	1.18411	0.728258	0.800063	0.84107	1.04122	0.59721
1.03679	0.82652	1.30163	0.95782	1.02426	0.96216	1.05867	1.20882	0.89951	0.846334	0.763981	0.918904	0.97398	0.53906	0.76653
0.69878	0.52696	1.14059	0.85137	0.98648	0.94429	1.13357	0.96917	1.02819	0.831691	0.569161	0.291033	0.86503	0.87173	0.77684
1.02936	0.99458	1.03713	1.05429	1.06795	0.906	0.71492	0.89076	1.07688	0.729991	0.847912	0.761556	0.73636	0.92015	0.7419
1.19237	0.88622	0.98128	0.96036	1.0931	1.07942	1.17041	1.17142	0.95891	0.963379	1.25593	0.779761	0.38715	0.95399	0.73154
1.11584	1.03979	1.05754	0.96237	0.69237	1.25511	0.9992	1.07723	0.91576	0.668895	0.699695	0.721108	0.99822	0.83066	0.53965
0.70271	1.08079	1.15258	0.61144	0.9622	0.98071	1.00006	0.75038	1.03668	0.805204	0.855072	0.685154	0.63898	0.69012	0.87251
0.92833	1.09358	1.09874	0.8633	0.7741	1.21533	0.94775	0.64189	1.05727	0.761687	0.491482	0.939281	1.17407	0.6477	0.79216
1.20936	1.24255	1.20776	1.07495	1.01653	0.76349	0.96246	1.06323	1.05309	1.34293	0.825868	0.725717	1.41969	0.88895	0.91653
1.09412	0.97277	0.98877	1.0442	0.58575	1.02263	1.22646	0.98733	0.5956	0.302935	0.599059	0.519798	0.79962	1.03971	0.66802
0.78223	1.03953	1.22415	1.02947	0.78604	0.63957	1.02568	0.85637	0.94041	0.967158	0.730828	0.798577	1.01941	0.89371	0.7811
0.99231	1.06376	1.09528	1.69584	0.90637	0.89128	1.07693	0.93594	1.12944	0.545119	0.780687	0.784859	0.49939	0.84488	2.52963
1.06827	0.77663	0.98427	0.39671	0.92562	0.62985	0.89601	1.03736	0.94266	0.910549	0.666934	0.764069	0.93664	0.91019	0.90579
0.79404	0.90823	0.21916	1.02518	1.04615	0.88887	0.98832	0.6443	0.93037	0.864494	0.733782	0.884606	0.80257	0.96778	0.65857
1.02637	1.03269	0.87513	0.70574	0.87843	1.02719	0.9528	1.10319	0.96876	0.791667	0.780785	1.33397	0.95111	0.63117	0.83744
0.81641	1.15505	1.074	0.65308	1.0738	1.09959	1.05448	1.03397	0.85656	0.8381	1.08848	0.866295	0.75117	0.40258	0.8962
0.92635	0.67345	0.96626	0.88455	0.93446	0.83386	0.92699	0.84293	1.23173	0.610638	0.617206	0.97005	0.80284	0.94389	0.82623
1.07673	1.03935	1.28033	0.84904	0.92679	0.88001	0.82799	1.06386	0.70974	0.514777	0.878409	0.811372	0.68692	0.87678	0.85989
1.19542	1.01189	1.1387	0.80636	1.05648	0.82432	0.89691	0.81445	1.03599	0.592119	1.03901	0.620758	0.89297	0.43921	0.81185
0.67948	1.12486	0.94892	1.0303	1.19518	1.15472	0.82138	0.94341	0.90214	0.858037	0.846086	0.468977	0.8864	0.8721	0.91428
1.11114	1.11083	0.92746	1.05478	0.98399	1.0764	0.81421	1.05972	1.02215	0.89662	0.695707	0.555826	0.57084	0.66108	0.57283
0.85688	0.95797	0.79947	0.94696	0.74371	1.04553	0.70295	1.73165	1.00339	0.753426	0.820337	0.666565	0.86082	0.76844	0.84424
1.1105	0.95706	0.93314	0.93434	1.08688	1.07353	1.12318	0.9333	1.00729	0.631668	0.474189	0.847598	0.81442	0.91601	0.83819
1.00417	1.039	1.04725	0.62553	0.92529	0.98179	1.13567	1.10037	1.0618	0.534106	0.831511	1.07023	0.67952	0.64695	0.68738
1.10149	1.03074	0.52938	0.64066	0.78691	1.05945	0.81544	0.93945	0.90403	0.699378	0.379677	0.480151	0.60374	0.78687	0.86147
0.96171	0.8841	0.84983	0.94076	0.84244	1.00661	1.03081	0.69533	0.74355	0.642052	0.358763	0.901395	0.73915	0.70287	0.93286
1.21215	4.13052	1.0759	1.04237	0.89889	1.00468	0.7341	0.73001	0.89398	0.863051	0.866001	0.89788	0.77828	0.54709	0.73949
0.65512	0.8284	0.89325	0.72714	1.06963	0.90303	1.04602	0.90883	0.85432	0.661391	0.573797	0.567823	0.76871	0.97387	0.69303
0.90968	0.81461	0.94216	0.82144	0.97885	1.03548	1.0836	0.95981	0.83362	0.805307	0.64587	0.786687	0.63986	0.75619	0.88046
1.03213	0.75583	0.90858	1.09226	0.96708	1.05401	0.825	0.86413	3.52554	0.705954	1.00251	0.695412	0.74644	1.12755	0.71475
0.9763	0.30164	1.0272	1.05094	1.1833	1.45517	0.94208	4.00228	0.97788	0.645132	0.657807	0.291891	0.71828	0.84831	0.68126
0.97577	1.1841	1.14669	1.24629	1.08195	0.88401	0.80206	0.85092	0.96625	1.13991	0.57808	0.753574	0.64022	0.85806	0.82508
1.14579	0.86764	0.7764	0.99026	1.12537	0.9941	0.9727	1.08824	1.02869	0.673509	0.839975	1.26962	0.92543	0.61588	0.78124
1.07291	1.12388	0.96004	1.15421	0.76152	0.92875	1.14457	0.99863	1.0415	0.668466	0.66862	0.644422	0.82427	0.78833	0.83905
0.63942	0.873	1.10296	1.29128	0.79987	1.13661	1.07667	0.91302	0.80847	0.608506	0.705768	0.58418	0.88018	0.94035	0.8237
0.71072	0.90088	1.03406	0.97667	1.0118	1.00036	1.21954	0.97274	0.89818	0.813131	0.878089	0.816358	0.8704	0.87944	0.61877
1.13971	1.09376	1.11819	1.31492	2.4929	0.90453	1.02988	0.92393	1.12178	0.774816	0.863152	0.877495	0.68479	0.85188	0.98977
1.10711	1.09044	0.79962	0.91781	0.83715	1.02945	1.09865	1.06848	1.07012	0.923846	0.849692	0.611792	0.84031	0.888	1.04736
0.99767	0.73732	0.94565	0.87082	0.90968	1.01321	0.61833	1.07797	1.07019	0.421163	0.37892	0.609284	0.38933	0.67534	0.55981
1.09978	0.97584	1.24655	0.98603	0.92459	0.86113	0.87207	1.0488	1.11064	0.95584	0.762932	0.587826	0.91159	0.81968	0.57959
1.17621	0.9389	0.42739	0.99421	0.66785	0.49318	0.6689	0.98247	0.867	0.544091	0.937122	0.54486	0.72206	0.66862	0.93312
1.11206	0.93893	0.79916	0.64976	0.8522	0.98119	0.57841	0.89805	1.03715	0.531493	1.0124	0.700062	0.96541	0.86395	0.81787
0.75985	0.80408	1.05086	0.95954	0.94295	1.0209	0.9348	0.94867	0.99441	0.691318	0.497467	0.748358	0.53225	0.82496	0.40339
0.66042	0.90391	1.08337	0.89091	0.88539	0.88462	0.94365	0.83496	0.72529	0.89119	0.802218	0.556712	0.90845	0.87858	0.68736
1.13109	1.00492	0.85746	0.9753	1.76378	0.27709	0.52378	0.82792	1.27546	0.769486	0.907728	0.987658	0.98037	0.98609	0.85441
0.70212	0.929	0.99648	0.90799	0.89925	0.77598	0.74417	0.64957	0.93072	0.642628	0.681404	0.842342	0.77175	0.9846	1.09641
0.99974	0.84957	1.24081	0.91726	0.99658	0.91952	1.03298	1.14131	0.95717	0.825249	1.27974	0.75954	0.6427	0.6336	0.71877
0.94286	1.21418	1.22921	0.99913	1.0588	0.85087	0.97764	0.8313	1.07305	0.925568	0.65161	0.647274	1.02918	0.90597	1.2846
0.96709	0.87373	0.76425	0.98097	0.79564	0.90111	0.86761	1.09764	0.90658	0.442894	0.736086	0.618855	0.72153	0.65543	0.74726
0.95194	0.92233	0.79982	0.93617	0.81654	1.03485	0.97998	1.09493	1.05417	0.802182	0.538435	0.868653	1.11348	0.57721	0.65674
1.16257	0.72277	1.09786	0.66263	1.0241	1.02234	1.28864	1.19658	0.91251	0.486841	0.638778	0.736379	0.98622	0.8295	0.66166
1.06036	0.99082	1.07687	0.81879	1.05494	0.89084	0.90231	0.88437	0.94758	0.872789	0.754305	0.644283	0.76973	0.88521	1.00685
1.05493	0.99022	1.23782	0.7052	1.06388	0.96329	1.04271	0.78364	0.9616	0.560019	0.862519	0.882674	0.90908	0.89764	0.62035
1.12815	1.16498	0.9088	1.08602	0.98901	0.85886	1.09948	0.89662	1.04076	0.784716	0.966216	0.60671	1.01504	0.64028	0.72918
0.98013	0.74213	1.11231	0.86266	0.77896	0.96579	1.05857	0.59189	1.0619	0.804313	0.511037	0.605547	0.89556	0.88508	0.90875
1.03156	1.03979	0.64508	0.68661	0.87129	0.99573	0.88613	0.82832	1.10282	0.797053	0.417689	1.20351	0.98341	0.59896	0.81775
1.03783	1.08229	1.07737	0.97234	0.47631	0.95003	0.81838	1.0385	1.06181	0.805949	0.757052	0.684614	0.89098	0.64596	0.85047
1.10836	1.0404	1.01625	1.02238	1.1137	0.95033	1.14125	0.52794	0.86386	1.5038	0.703984	0.813551	0.73328	0.83298	0.89498
1.04593	1.02223	0.66168	0.95094	0.84519	0.98194	0.89946	1.27326	0.96872	1.32524	0.484763	0.552435	0.90222	0.94072	0.97078
0.98402	1.10897	0.7603	0.80492	1.22953	0.95626	0.94709	1.64028	1.01201	0.582087	0.965846	0.564197	0.86182	1.00287	0.74132
0.9083	1.08367	1.00624	1.04031	0.85037	0.85868	0.9063	0.72578	1.04864	0.792972	0.617385	0.813365	0.93525	0.96544	0.87794
2.40436	1.01641	0.92995	0.56169	0.67548	1.1286	0.95478	1.03981	1.04511	0.867268	0.530428	0.604346	0.93132	0.92395	0.81235
1.03888	0.83502	1.02581	1.01318	0.85518	1.05838	1.02087	0.76539	1.19528	0.324946	0.660243	0.910102	0.94005	0.92389	0.3354
0.97742	0.92273	0.97135	1.02443	0.87832	0.93915	0.98622	0.99173	1.0718	0.94058	0.524886	0.595525	0.76451	1.04898	0.50734
1.12256	0.99296	0.73205	1.14518	0.90545	0.87388	0.64102	1.12057	0.98399	0.57159	0.97237	0.447491	0.78351	0.77128	0.81727
1.00317	1.26326	1.0116	1.08254	0.98302	0.90453	0.80849	0.90035	1.11311	0.544013	0.704513	0.462822	0.61008	0.89376	0.95462
0.91314	1.18994	1.02852	0.71467	0.99717	1.11021	1.07862	0.60893	1.18369	0.873997	0.96705	0.617964	0.93017	0.72281	0.99592
0.69576	0.84102	1.04733	1.0458	0.98953	0.93685	0.75244	0.90758	0.8118	0.931968	0.808178	0.740395	1.03232	0.95836	0.99671
0.7394	1.00779	1.10635	0.84548	0.99899	0.85809	1.11518	0.9136	0.96597	0.678719	0.613358	0.617388	0.81198	0.93019	0.8794
1.04126	1.03946	1.15482	0.74944	0.81231	0.73297	1.04766	0.97144	0.99433	0.486223	1.00514	0.803398	0.51586	0.93291	0.70973
0.87379	0.74706	1.31918	1.09569	1.00676	0.6636	0.95582	0.45967	1.07826	0.376581	0.544342	0.873095	1.05112	0.37614	0.86243
0.99465	0.95998	0.95273	0.86661	1.13762	0.6963	0.55407	1.01983	0.93878	0.828887	0.648087	0.914087	0.69844	0.52991	0.66279
1.02899	0.93982	0.96648	1.06112	0.90115	0.95805	0.74303	1.38329	1.28974	0.987116	1.04319	0.707587	0.86665	0.90004	0.88413
0.73432	1.00302	0.62344	0.91042	0.61862	0.84065	1.06139	0.94915	0.73026	1.32884	0.884227	0.70344	1.04859	0.91657	0.92045
0.72916	1.01097	0.82506	0.96857	0.96327	0.93642	0.90568	0.72662	0.67822	0.660405	0.870702	0.802532	0.89443	0.85577	0.86582
0.9628	1.29787	0.81652	0.72568	0.71164	1.03463	0.93821	0.94533	0.94832	0.762191	0.861956	0.50571	0.88558	0.81924	0.68818
1.1224	1.01884	0.9197	0.983	0.90926	0.99909	1.10985	0.80154	1.06344	0.640305	0.782164	0.639159	0.70929	0.73095	0.57785
1.00313	1.0004	1.57849	1.06504	0.87835	0.72946	1.05261	0.29247	0.91611	0.878007	0.618083	0.954274	0.8907	0.34167	0.68739
0.95484	1.15226	1.14487	0.86525	0.79303	1.56299	0.84862	0.93954	0.77929	0.765438	1.41461	4.89735	0.58997	1.04083	0.93499
0.91915	0.73754	1.02111	0.98513	0.54434	1.01394	0.91537	1.08799	0.98245	0.777243	0.865285	0.605184	0.78039	0.83958	0.84921
0.99498	1.03573	0.97275	0.80083	1.03464	1.10829	0.90343	0.87041	1.03202	1.03209	0.793466	0.553783	0.68324	0.70361	0.82174
1.03798	0.9032	0.99352	1.04531	0.91491	1.02601	0.81682	0.90467	1.05054	0.871683	0.741529	0.983893	0.81488	0.94787	0.9916
1.21577	1.10709	0.7564	0.97506	0.83319	1.21236	0.91153	1.13203	1.02319	0.902671	0.725406	0.765806	0.83379	0.87768	0.8998
0.79061	1.13125	1.16779	0.97856	0.71444	1.0035	0.81301	0.94585	0.88767	0.709007	0.629307	0.734671	0.66315	0.84736	0.89069
1.00569	1.08823	1.09643	1.01618	1.07275	0.97164	0.76143	0.9661	1.02409	0.694709	0.747435	0.502297	0.72799	1.01494	0.47474
0.92519	0.92768	0.8159	0.93377	0.96137	0.94199	1.10582	1.12458	0.76722	0.745903	0.786991	0.899366	1.04549	0.92137	0.95695
1.05415	0.90487	1.169	0.77584	0.86197	0.92085	0.99072	1.1376	0.84657	0.770636	0.76839	1.07816	0.91352	0.47558	0.52907
1.313	0.94642	0.98462	0.8959	0.62084	0.766	1.05863	0.80221	1.01044	0.855319	0.490984	0.721494	0.8344	0.91081	0.90491
1.32098	0.98473	1.2068	1.02674	0.97372	0.78672	1.00521	0.95639	0.97084	0.416003	0.428321	0.987141	0.77028	0.8839	0.90393
1.14775	0.7906	0.9887	1.05719	0.93748	0.83358	1.09731	1.10782	0.79681	0.693184	0.697663	0.628155	0.87053	0.88373	0.85817
0.92739	1.03411	0.99421	0.96123	1.13708	1.14067	0.9389	1.0499	1.07711	0.780615	0.503592	0.929618	0.71078	0.46972	0.69794
0.94547	0.98866	1.00018	0.79568	1.08713	0.96522	0.79886	1.08812	0.95955	0.770677	0.742227	0.644781	0.75148	0.7395	0.94968
1.06365	0.75382	0.98168	1.00203	0.9439	0.69761	0.85363	1.02413	1.02414	0.47046	0.648436	0.761611	0.8493	0.77389	0.86953
1.20791	0.94548	1.07492	0.79731	1.06594	1.03206	1.03324	0.89402	0.91094	1.07339	0.751539	0.847785	0.90991	0.69654	0.8694
1.09595	1.26755	0.88658	0.98237	0.84667	0.92881	0.90584	0.99761	0.38403	1.07548	0.88153	0.861424	0.76964	0.78991	0.61092
0.85449	0.66853	0.77732	0.79964	0.65421	0.67536	0.83274	0.9458	1.1464	0.507143	0.749156	0.636831	0.92665	0.77336	0.71069
1.04562	1.18823	0.84649	1.02605	0.88459	1.09863	1.03362	1.0247	0.79715	0.587862	0.702983	0.904119	0.90068	0.61299	0.73384
1.13179	0.71936	1.04161	1.174	0.89182	0.95514	1.3014	0.86399	1.11646	0.660953	0.786004	0.877688	0.93751	0.74758	0.70264
1.08085	1.1397	1.10223	1.07357	0.81177	0.68876	1.0626	0.67913	0.97541	1.0061	0.548985	0.635788	0.55777	0.84338	0.80748
0.99061	1.14131	1.0009	0.81961	1.05362	1.15432	1.06722	0.99932	0.96151	1.12786	0.469643	1.07912	0.76537	0.80283	1.01298
1.08083	0.818	0.80589	1.13035	0.87049	0.96043	1.03187	0.80143	0.63027	0.395916	0.459983	0.886776	0.79592	0.8517	0.88276
0.83593	0.98641	0.92655	0.76269	0.86221	0.8994	1.14488	1.06015	1.07225	0.692334	0.801214	0.722393	0.88763	0.61901	0.72363
0.89136	0.89471	1.10909	0.88058	1.0501	1.11223	0.94112	0.79861	0.97666	0.374716	0.86524	1.64948	0.76511	0.71433	0.66831
0.9383	0.99594	1.12362	1.05099	1.05909	1.09007	1.03404	0.85834	0.75515	1.04649	0.749386	0.743229	0.87701	0.78952	0.82335
0.91508	1.0619	1.00519	1.27092	0.85271	0.75644	0.73242	1.05166	0.65298	0.850449	0.692974	0.421357	0.87193	0.53165	0.73005
1.06872	1.00287	0.96601	0.54472	1.07153	0.58003	0.75532	0.92615	1.03582	0.812803	0.636707	0.843518	0.86878	0.75444	0.99563
0.76011	0.87742	1.05866	1.05968	0.75108	0.88655	1.11021	1.0854	1.04233	0.669213	0.871693	1.1257	0.97397	0.71228	0.93669
1.13603	1.0001	0.64147	0.99855	1.18066	0.96531	0.96893	0.90835	1.11812	0.719333	0.75924	0.30726	0.79435	0.92651	0.88747
1.02019	0.73427	1.01292	0.77503	0.90473	0.98333	1.00365	0.98361	1.08365	0.735517	0.668855	0.818533	1.50639	0.8838	0.9165
1.09512	0.8464	1.1234	0.55499	1.01422	0.94373	0.8806	0.81854	1.00626	0.675391	3.40476	0.814003	0.77416	1.0195	0.53052
0.92894	1.01358	0.98943	1.29317	1.01395	0.83882	0.82649	1.10855	1.2213	1.09589	0.354727	0.672404	0.92256	0.87928	0.71698
0.95441	1.19023	0.74834	0.79176	0.9862	1.04708	1.19742	0.99101	1.01043	0.793147	0.887083	1.32	0.99778	0.90142	0.65917
1.06947	1.0447	1.02737	0.63385	1.13764	1.0651	0.99191	0.89046	1.09533	0.905889	1.06363	0.679544	0.43904	0.82797	0.86262
0.96557	0.831	1.08249	0.74237	0.99975	1.04793	0.75265	0.86296	0.68622	0.302309	0.71686	1.05944	0.84566	0.93631	0.94771
1.09972	1.0783	1.06784	1.00281	0.93198	1.02673	0.98103	0.85349	0.80232	0.51392	0.924422	0.780451	0.98873	0.99131	0.92502
0.70228	1.00819	1.12175	0.93764	0.60982	0.64537	0.97656	1.06685	1.00806	0.505334	0.761626	0.806566	0.62768	0.77509	0.97483
1.02735	0.9315	0.98052	1.04561	0.97711	2.4946	0.94789	0.65132	1.03496	0.983354	0.626879	0.226173	0.92658	0.96548	0.73623
0.91922	1.00809	0.98677	1.06886	1.19737	0.96006	1.04825	0.81936	1.04614	0.827441	0.765414	1.00879	0.94911	0.8773	0.6452
0.69858	1.24792	0.98802	0.97482	1.01749	1.05971	1.03705	1.04738	0.6699	0.691574	0.897766	0.667659	0.99251	0.93553	0.9429
0.64734	1.16384	1.19345	0.92737	1.13471	1.03668	0.96627	1.02752	0.77507	0.695431	0.882941	0.549644	0.93186	0.75858	0.92516
0.89883	0.98036	0.96032	1.04773	0.85664	0.67369	1.03689	0.47319	0.85855	0.257308	0.655726	0.759184	0.81596	0.80502	0.61909
1.08697	1.08639	1.09741	0.94921	0.34048	1.17705	0.81814	1.02494	1.0365	0.803177	0.746532	0.745303	0.7986	0.93993	0.95133
1.07624	1.13348	0.62223	0.59848	0.51835	1.44481	1.02062	0.95634	0.78888	0.388531	0.482518	0.27537	0.9883	0.97571	0.87138
0.98023	0.90223	1.19616	1.00859	1.00989	1.15804	1.12721	1.13701	1.01443	0.549543	0.228592	0.736723	0.91536	1.06381	0.57222
1.14695	1.19703	1.20269	1.00728	0.82424	1.16357	0.96736	0.9019	1.07362	0.556848	0.752498	0.448556	0.68481	1.13744	0.60235
1.16786	1.2236	1.04699	1.09139	1.00516	0.80347	0.94328	0.89625	0.48297	0.607479	0.762178	0.714485	0.67387	0.837	0.79248
0.9202	1.09181	1.26118	0.85181	0.73186	0.94872	1.10144	1.05581	0.91321	0.782756	0.776873	0.253979	0.88243	0.83759	0.77868
1.19658	1.25147	1.05411	0.89084	0.98444	1.02542	1.07286	1.0105	1.07501	0.883718	0.40908	0.539578	0.5433	0.80386	0.90641
1.04884	1.12545	1.15706	0.99102	1.06279	0.67569	0.92521	1.13122	0.85798	0.881517	0.577579	0.770044	1.04449	0.81823	0.66653
0.95028	0.88942	0.97022	0.65822	1.06405	0.82053	0.73404	1.05801	0.88781	0.249336	0.460609	0.450942	0.94477	0.92753	0.92909
0.99398	0.99872	1.06904	1.02285	0.91161	1.03267	0.85157	1.0516	0.96572	0.518958	0.812561	0.941874	0.86527	0.92827	0.66108
1.45308	1.13467	0.95906	0.65299	1.0211	1.04627	0.56395	0.99681	1.07712	0.612827	0.838623	0.399316	0.8596	0.75174	0.90136
1.15075	1.01019	1.10907	1.02516	1.15989	1.08032	0.7976	1.02381	1.1955	0.684264	0.637435	1.65477	0.94064	0.60203	0.88807
0.97696	1.12949	0.83401	0.6085	0.87657	1.11076	0.73989	1.11225	0.92067	0.654686	0.689568	0.575351	0.85446	0.92616	0.43423
0.77235	1.11069	1.228	0.97832	1.38824	1.0284	0.71459	0.95146	0.91294	0.489644	0.920371	0.668642	0.767	0.88798	0.93426
0.95082	1.05895	1.0409	0.99726	0.96489	1.0641	1.02684	0.82269	1.06011	0.848278	0.570148	1.09353	0.79399	0.7855	0.94264
0.59029	1.0654	0.74298	0.98619	1.12145	0.79768	1.07303	0.87306	1.04566	0.910826	0.885003	0.988449	0.7295	0.90916	0.95262
0.71438	0.93583	0.98913	0.76435	1.02956	0.76221	0.55743	0.88195	0.99783	1.0125	0.576117	0.882023	0.8434	0.96528	0.81519
1.00735	0.79265	0.76563	0.71206	0.97714	1.02851	0.4899	1.00489	0.91007	0.73621	0.889638	0.791676	0.75797	0.7746	0.89856
1.06173	1.47404	0.88166	0.863	1.07384	0.77338	1.06142	0.92087	0.93793	0.778768	1.22747	0.652946	0.70855	0.75724	0.7899
0.89528	1.03613	0.89355	0.69843	1.00363	1.10268	1.14179	0.77463	1.07433	0.695714	0.850164	0.571511	0.70358	0.80861	0.85722
1.13651	1.08019	1.08022	0.67932	1.21451	0.96957	0.84231	0.69674	0.90193	0.665275	0.566194	0.87124	0.65609	0.77863	0.75168
1.19374	1.00609	0.91086	1.16971	0.87443	0.93455	1.0032	1.16545	0.907	1.28124	0.750819	0.769523	0.74776	0.87469	1.00961
1.13311	0.77611	0.5828	0.91498	1.07248	0.89046	0.91784	0.86647	0.95102	0.996132	0.851455	0.780326	0.91882	0.82646	0.66428
1.15363	1.05865	1.06338	0.8366	0.96084	1.06453	0.89346	1.1888	1.1155	0.66906	0.981562	0.809951	0.82254	0.9661	0.77889
1.14975	0.87035	0.96435	1.00484	0.98507	1.1081	0.54477	1.05093	0.88427	0.445879	0.854399	0.815262	0.90168	1.03791	0.62055
0.8835	1.04047	0.49179	1.04896	0.87166	1.08604	1.01426	0.70003	1.09562	0.57296	0.673315	0.990896	0.69444	0.93146	0.83693
1.08559	0.93169	0.81996	0.87354	1.01593	0.87999	0.73193	1.04343	1.41418	0.838087	0.843053	1.36858	0.75021	0.8766	0.89653
1.12118	1.06853	1.077	1.01387	0.74203	0.90929	0.50116	0.82325	0.57123	0.629333	0.77222	0.709068	0.47504	0.92036	0.77315
1.11188	1.09713	0.88045	1.28091	0.88676	1.13928	0.88484	0.92543	0.77252	0.541267	0.808256	0.657413	0.88444	0.85213	0.71694
0.84283	0.88135	0.76926	0.97706	1.08205	1.01357	1.02347	1.03771	1.37214	0.794144	1.09776	0.239554	0.93406	0.97943	0.70826
1.09619	0.85637	1.10234	0.80756	0.89492	0.73505	0.99604	1.06139	0.97904	0.879752	0.599875	0.619527	0.95275	0.7645	0.87743
0.9375	0.94372	1.14804	0.96415	0.76644	0.84088	1.02326	0.9798	0.48384	0.734737	0.868497	0.625333	0.71112	0.84157	0.68332
0.9657	0.66091	0.95152	0.90584	0.92554	0.94181	0.90468	0.51649	1.033	0.869667	0.797629	0.731699	0.39186	1.06751	0.65774
0.83071	1.16511	0.92898	1.19872	0.45776	0.87774	0.87234	1.06387	1.2359	0.830461	0.59267	0.732652	0.99665	0.83847	0.69122
0.79978	0.8452	1.02698	0.88471	1.05448	1.03929	0.9	0.78518	1.032	0.78972	0.720534	0.457035	0.94942	0.54065	0.52419
1.15526	0.9058	0.93468	1.00801	1.16557	1.05941	0.99619	0.72391	1.04508	0.653186	0.781471	0.784644	0.7849	0.52554	0.95222
0.8915	1.06171	0.40477	1.02045	0.66391	1.26634	1.0602	0.82601	0.8996	0.584913	0.502453	0.684354	0.8221	0.92936	0.76245
0.63477	0.98169	0.8791	0.94304	1.04407	0.73001	0.87944	0.92595	0.76909	1.26569	0.668326	0.544641	0.7657	0.55643	0.92718
1.05929	0.58471	0.72177	0.8934	0.99748	0.97712	0.71751	1.01167	0.83453	0.860248	0.74185	0.992659	0.83496	0.95492	0.9995
1.11889	0.94502	1.31421	0.75634	1.13418	1.37448	0.81201	1.05042	0.96262	0.698411	0.728592	0.963739	0.92905	0.91883	0.87751
1.03998	0.7612	1.01894	0.99157	0.72512	0.63134	0.76792	1.088	0.83064	0.275152	0.769205	0.777489	1.05105	0.76825	0.88778
0.76455	1.03443	0.82149	0.99952	0.83816	0.95315	1.12014	1.17825	0.98502	0.49872	0.688779	0.79751	0.6935	0.68483	0.81426
1.00035	1.00017	1.07441	1.08659	1.0498	0.94349	0.86641	1.03249	0.95385	0.830348	0.733722	0.697284	0.86756	0.792	0.71966
0.91106	0.9825	0.94055	0.92664	0.81223	1.03131	0.99016	1.01938	1.06541	0.9035	0.502238	1.13795	0.99905	0.90717	0.53107
0.80684	0.6102	1.16501	0.99646	0.85814	1.21895	0.9964	0.98503	1.06935	0.735202	0.787449	0.861574	0.81508	0.9521	0.63662
1.13092	0.98775	0.93626	1.1909	1.10499	1.02595	0.88478	1.01317	0.79059	0.657486	0.506907	0.99584	0.47843	0.63051	0.85562
1.28621	1.23906	0.58982	0.95458	0.96378	0.8303	0.7844	0.58412	1.05027	0.456325	0.712417	0.821971	0.8724	0.60777	0.75673
1.10393	1.03472	1.01318	0.91883	1.13894	0.88087	1.01053	1.09806	1.2039	0.765981	1.02664	0.616306	0.65413	0.68454	0.97576
1.07358	0.91829	1.1178	0.98665	0.86515	0.89152	0.94156	0.74725	0.96789	1.05117	1.10716	0.594667	0.75052	1.00556	0.72112
0.53383	0.71773	1.19872	0.97102	0.74289	0.7518	0.911	0.86257	1.13541	0.612111	0.684562	0.594867	0.71545	0.96475	0.87067
1.12121	0.99728	0.65272	0.99854	0.90324	0.83382	1.18794	1.12652	1.34727	0.797419	0.68549	0.862694	0.52552	0.80632	0.8186
1.07875	0.85873	1.0446	0.74701	0.59504	0.93356	1.05588	1.35855	0.9359	0.654756	0.819607	0.739474	0.79484	0.68449	0.80223
0.94774	1.17404	0.96154	0.90078	0.86143	0.62155	0.32133	1.09623	1.02863	0.822785	0.755293	0.750144	0.68454	0.65856	0.82763
1.1313	1.10376	1.01909	0.82894	1.06562	1.10377	1.07098	0.53735	0.9502	0.644563	0.837154	0.92517	0.90401	0.91703	1.00368
0.93547	1.3943	1.13676	0.90821	0.72027	0.79566	0.99713	1.24262	1.07076	0.741574	0.838924	0.802492	0.88707	0.44699	0.66801
0.71608	1.00256	1.1227	0.84632	0.81503	1.07634	0.89233	0.36142	1.11563	0.688521	0.614354	0.555632	0.68405	0.98918	0.86544
0.49479	0.93903	0.72911	0.63302	1.055	1.07946	0.84463	1.02236	0.97751	0.71674	0.61896	0.677832	0.64347	0.72597	0.90202
1.1084	1.04418	0.82188	1.06514	0.90309	0.9404	1.04217	1.07649	1.17703	0.964199	0.456065	0.94066	0.69361	0.88626	0.8965
1.05082	0.9408	0.71516	0.9155	1.04973	0.99044	0.99534	1.04813	1.11031	0.63132	0.741047	0.164102	0.74054	0.52384	0.82255
0.86583	1.02528	1.09239	0.86627	0.89352	0.96142	1.05957	1.06532	0.94334	0.236555	0.736129	0.852593	0.42184	0.53822	0.53559
1.03513	0.73545	0.96312	0.89778	0.90431	0.97609	0.90221	0.59263	0.91686	0.857375	0.835548	0.758098	0.98008	0.71241	0.92061
0.93487	1.05335	0.98788	1.04193	0.98104	0.68077	0.91403	0.92533	1.11196	0.996823	0.642041	0.484255	0.80026	0.84161	0.85597
0.80371	0.72609	0.98851	0.74811	0.69758	1.0695	0.72732	1.07652	0.76539	0.807903	0.913267	0.527718	1.02466	0.50046	0.82959
1.05982	0.92628	1.21891	0.68572	0.90524	0.89659	0.63748	1.0379	0.79975	0.971116	1.04895	0.60521	0.80202	0.75491	0.9804
1.14573	0.67971	0.98505	0.98428	0.87998	0.94462	0.97847	0.97667	0.78167	1.22226	0.754969	1.22438	0.9467	0.55158	0.84306
1.02394	0.93685	0.87944	0.8793	0.97701	0.79347	0.57459	0.90885	0.92839	0.772324	0.664385	0.650794	0.67984	0.91489	0.76071
1.01244	1.01104	1.1989	0.87394	0.75336	0.70647	0.713	0.78087	0.67528	0.66214	0.643617	0.957662	0.76848	0.62862	0.48078
0.60867	1.02693	1.21312	0.84796	0.97419	1.22763	0.97904	0.86205	0.97828	0.614279	0.925756	0.703943	0.81946	0.65382	0.60479
1.33318	0.66686	1.03598	0.92661	0.90013	1.30195	0.97474	0.76774	0.95985	0.484618	0.685999	0.725423	1.04003	0.85566	0.5932
1.1244	0.65011	0.95555	0.8334	1.14071	2.95675	0.75273	1.07889	0.94949	0.73707	0.585398	0.651934	0.9762	0.88508	0.80914
0.58777	0.69731	1.03978	0.7588	1.13885	0.93772	1.29184	1.02809	0.67599	0.862757	0.96858	0.648766	0.81093	0.8406	0.89492
1.08631	0.70329	1.17397	0.83968	0.986	1.06528	0.93672	0.94647	0.98878	0.47048	0.850185	0.857852	0.71393	0.84695	0.73019
0.99749	1.01356	0.51484	1.0584	1.05574	0.957	0.95089	0.40429	1.2526	0.789719	0.8262	0.65019	0.89142	0.94081	0.82711
0.97398	0.84511	0.89088	1.04554	0.64899	1.00607	0.77899	0.94472	0.87348	0.663098	0.929292	0.809161	0.62605	0.96157	0.93193
0.81342	1.08742	1.01168	1.00356	0.6032	1.01703	0.82859	0.91833	0.35296	0.795299	1.36936	0.349302	0.73317	0.91021	0.73627
0.94469	1.05739	0.97733	0.87082	1.0777	1.09732	0.90309	0.94279	1.14345	0.514175	0.959712	0.641417	0.78074	0.71315	1.08925
1.23666	1.07881	1.07852	0.88865	0.98953	0.91684	0.99915	0.80771	0.77335	0.849413	0.818991	0.857433	0.59617	0.93735	0.9948
0.95085	1.07049	1.03495	1.05831	0.63637	1.12555	1.1745	0.88857	0.8254	0.691053	0.648185	0.568722	0.64368	0.65188	0.83863
0.81649	1.05163	0.99327	0.75395	1.05082	1.0256	1.03108	0.36573	0.89776	0.911784	0.697849	0.735173	0.98569	0.87502	0.8509
1.00814	0.96884	0.68038	0.89341	0.92124	0.84207	0.93411	0.80407	1.08857	0.941997	0.761679	0.785861	0.51903	0.84042	0.67823
1.06131	1.00897	1.06607	0.48908	1.09651	0.80225	1.3095	1.06788	0.87515	0.931954	0.901733	0.941856	0.61152	0.74521	0.73174
0.92085	1.29409	1.12978	1.09147	0.52348	0.86486	1.08734	1.01558	0.78265	0.530928	0.913964	0.420288	0.90235	0.9287	0.86506
0.84607	0.87598	1.11837	1.14973	0.7445	1.01838	0.82455	0.86521	1.14945	0.728199	0.401112	0.774741	0.7789	0.75466	0.90036
0.76847	0.98357	0.97762	0.854	0.86134	1.03361	0.78196	0.9976	0.91116	0.519272	0.714305	0.70811	0.68179	0.76985	0.82758
1.02891	0.87079	0.99662	0.94777	0.85892	0.78475	1.13882	0.85146	0.89655	0.513702	0.953436	0.985606	0.94286	0.90413	0.80086
0.87433	1.06717	0.96411	0.81027	1.19562	0.62393	0.93761	0.84404	0.80658	0.835353	0.688531	0.819595	0.80803	0.96051	0.79908
0.89537	0.74464	0.91193	1.03299	1.113	1.09777	1.03912	1.02673	0.94912	0.870091	0.54243	0.55188	0.57442	0.82282	0.85442
0.83965	0.85556	1.14648	0.82597	0.83365	0.96429	1.14637	0.72122	0.56524	0.922217	0.630703	0.63483	0.69349	0.88443	0.54682
1.07381	1.00292	0.93461	1.04621	1.12872	0.96992	0.94931	0.6522	1.21308	0.716562	0.708537	0.301679	0.79062	0.72715	0.81581
1.11301	0.53429	0.83938	0.90308	0.90245	1.20424	0.87891	0.81901	1.08914	0.654163	0.672654	0.762788	0.68498	0.85682	0.68513
1.26626	0.99749	1.1587	0.87543	0.35349	1.07936	0.98226	0.72014	0.86658	0.834582	0.907223	0.740307	0.84929	0.95514	0.79474
1.1063	0.9824	1.05912	0.97547	0.81599	0.98396	1.05269	0.98638	0.84191	1.15016	0.701394	0.631287	0.89509	0.74127	0.59036
1.10211	0.87815	1.03583	0.96466	0.99115	1.01014	1.00249	0.57865	1.10687	1.07618	0.677256	0.422492	0.79709	0.59359	0.74569
1.05903	1.26735	0.85219	0.74258	1.25503	0.81642	1.01166	1.05549	0.78103	0.737813	0.698049	1.04961	0.80228	0.9121	0.964
0.674	0.88159	0.87562	1.08402	0.65983	1.18887	0.92246	1.10592	0.9889	0.60829	0.526887	0.646267	1.02862	0.97381	0.72098
1.33916	0.9636	1.08065	1.09838	0.95531	1.07162	1.06318	1.10761	0.67539	0.506357	0.23609	0.953412	0.73674	0.93491	0.89702
1.09523	0.9726	0.81612	0.98175	0.91948	0.81587	1.0297	0.73489	0.97076	0.452836	0.378075	0.636744	0.82792	0.9371	0.83355
1.13588	1.00923	1.02281	0.88302	0.7055	1.06815	0.97325	0.36804	0.88406	0.640938	0.914538	0.742409	1.22787	1.0895	0.90416
1.08016	1.10799	0.93596	0.91034	1.10276	0.91598	0.66943	0.70427	1.09588	0.750648	0.639203	0.608038	0.70818	1.46174	0.49258
0.93785	0.84605	1.02881	0.85779	0.97007	1.06378	0.77362	0.88539	0.98256	0.84935	1.10525	0.885774	1.00737	0.84098	0.51842
0.60421	0.63662	1.12507	0.96121	0.78043	0.50856	1.0237	0.56478	1.0147	0.79819	0.705518	0.779215	0.97983	0.93339	0.84829
0.81554	1.08085	1.07805	1.20129	0.88335	1.07261	0.90575	0.91016	1.06668	0.845216	0.770211	0.729222	0.56863	0.90346	0.82744
1.14626	0.89501	1.04318	0.8379	0.83507	0.7978	0.96737	0.80601	0.75429	0.651312	0.822116	0.66397	0.96652	0.7585	0.99748
0.86964	1.18695	0.7083	0.79057	1.05368	0.9132	1.01321	1.0736	0.98225	0.82147	0.73014	0.625099	0.84768	0.86418	0.92319
0.98854	1.1682	1.091	0.51844	0.99318	1.02276	0.96073	0.80161	0.80674	0.300211	0.807013	0.659724	0.59775	0.65897	0.85041
1.02859	0.89689	1.10849	0.99932	0.86212	0.86114	0.85448	1.0192	0.94129	0.360255	0.969201	0.941546	0.82419	0.83879	0.55507
1.01721	1.17698	1.10176	0.76553	1.03405	0.98871	1.0164	0.99697	1.22205	1.00563	0.822723	0.670533	0.85659	0.90329	0.46956
1.10744	1.04327	1.03918	1.10998	1.15256	1.0628	1.18987	1.04906	0.99125	1.32889	0.709628	1.03825	0.92074	1.01013	0.94098
0.68778	0.71993	1.12482	0.81582	0.71078	1.14688	0.80281	0.77296	0.85286	0.735776	0.602622	0.60017	0.74353	1.01564	0.8008
0.79128	0.74641	0.91468	1.06841	0.71154	0.81881	0.67096	0.94525	1.03231	0.847289	0.495885	0.812683	0.51483	1.00827	0.72343
1.08091	1.00817	1.07288	0.98251	1.12521	1.02306	0.87192	0.80479	0.97714	1.01897	0.630533	0.326008	0.82342	0.87329	0.93721
1.14094	1.04348	1.15969	1.09422	1.22557	0.79423	0.76776	1.21993	0.97092	0.425231	0.727404	0.749653	0.82853	0.7807	0.83543
0.60527	0.86297	1.00836	1.07103	0.96134	0.82436	1.00276	1.05824	1.00107	0.724709	0.40379	0.682696	0.85217	0.87524	0.76907
0.30421	1.14579	0.93572	1.13928	0.96357	1.12406	0.72895	0.72598	0.92616	0.419303	1.19636	0.637374	0.78763	0.74825	0.8671
1.22404	1.04266	1.01744	0.90958	1.19207	0.73521	0.95527	0.80896	1.1861	0.793787	0.551247	0.977573	0.60891	0.73522	0.66989
1.28861	0.36558	1.02943	1.11836	1.00193	1.06574	0.50553	0.71795	0.82776	0.917991	0.315269	0.734968	0.64643	0.77074	0.6299
1.18932	1.14604	1.04543	1.10847	1.00829	0.98416	0.83882	1.0382	0.92826	0.652075	0.867198	0.873102	0.75873	0.71145	0.8875
1.0114	0.92752	0.99299	0.85919	1.04369	0.9197	0.9013	1.67435	0.81313	0.793394	0.578225	0.679346	1.02364	0.82082	0.78905
0.81422	1.00888	0.90984	0.96441	0.86432	0.70951	0.90472	0.83585	0.93215	0.634205	0.425287	0.935906	0.65635	0.61243	0.9445
1.01958	0.84893	0.93176	0.86825	1.08915	0.83568	0.93437	0.86735	0.78849	0.45041	0.944922	1.49427	0.92603	0.65271	0.84313
1.30442	1.16812	1.08459	0.82782	0.85372	0.95061	0.93174	0.78987	1.20384	0.753988	0.859932	0.768182	0.64919	0.71872	0.73952
0.93943	0.81605	1.25393	0.95512	0.96849	1.05141	1.11255	0.99644	0.98249	0.344044	0.805778	0.761072	0.78943	3.33566	0.67678
1.05751	1.17189	1.0651	0.83022	0.94063	0.97391	0.99701	0.85514	1.10468	0.700721	0.725129	0.730108	0.44117	0.87337	0.78063
1.10454	0.85267	1.19245	1.04196	0.76955	0.91704	0.98683	1.15857	0.66801	0.85519	0.668431	0.866143	0.99582	0.75871	0.67986
0.84676	1.08876	0.80716	1.02145	0.95151	0.89756	0.55888	0.47176	0.82484	0.770384	0.38624	0.843185	1.26553	0.75528	0.902
1.20767	1.12477	1.06736	0.83765	1.03695	0.93035	1.08724	0.75371	1.12913	0.564118	0.836424	0.727842	0.71089	0.85968	0.73207
0.98141	0.8676	1.04922	0.84391	1.00881	1.95244	1.14489	0.32581	1.02818	0.598229	1.04711	0.555569	0.80433	0.86461	0.92373
1.07971	1.05818	0.84237	0.87971	0.90436	1.03634	1.0054	1.09876	1.08834	1.09688	0.7522	0.647835	0.44701	0.83683	0.82989
1.05835	1.15945	1.01264	1.49514	1.07222	1.16685	0.77121	0.84516	0.96669	0.620505	0.838503	0.517815	0.93079	0.94058	0.80851
1.11386	0.55112	0.99226	1.03854	0.93745	1.03399	0.96203	0.9134	0.9517	0.855858	0.74654	0.601682	0.98646	0.75825	0.85978
0.80856	0.95298	0.85259	0.77108	0.89089	0.77199	1.10528	1.17127	0.95525	0.608769	0.776964	0.526644	0.86347	0.93119	0.804
1.22717	1.25902	0.97278	0.95824	0.92013	1.19139	1.13079	0.98085	0.57176	0.75222	0.90645	0.539445	0.77599	0.65569	0.82514
0.82436	0.97821	1.00982	0.98336	0.96076	1.00206	1.12249	0.8784	0.86911	0.851541	0.859792	0.658954	0.83507	0.85219	0.79987
1.03847	1.0098	1.06524	1.02859	0.42601	0.59674	0.87436	1.05216	1.12891	0.330209	0.93136	0.730133	0.8788	0.94616	0.87583
1.13259	0.72818	0.8302	1.08983	0.9983	1.11119	0.9997	1.12707	0.76107	0.624092	0.720343	0.942519	0.91722	0.71578	0.65826
0.73902	1.06235	1.01773	0.98775	0.84505	1.0192	0.72996	0.98067	1.05754	0.761076	0.615826	0.282454	0.99527	0.81196	0.81859
0.69825	0.85768	1.00785	0.72301	0.97043	0.70872	0.87568	0.95926	1.16144	0.781914	0.779998	1.22631	0.84521	0.73688	0.78667
0.85903	1.00242	1.12244	0.94942	0.79557	0.95097	1.07099	0.76976	1.14683	1.00513	0.97721	0.349376	0.78762	0.52477	0.50479
1.14039	0.91023	0.98965	0.90373	1.11434	0.84365	1.15979	2.66136	0.96888	0.718518	0.714338	1.04295	0.70766	0.92886	1.03311
1.03583	1.1824	1.19334	0.99823	0.82074	1.12376	0.87486	1.11604	0.99261	0.733741	0.749306	0.82686	0.87733	0.93779	0.88246
1.09961	1.11944	1.02823	1.04562	1.06497	1.3577	0.98228	1.10716	0.7289	0.885033	0.648531	0.829711	0.87763	0.92638	0.70434
1.29533	0.97335	1.16101	0.96133	0.96269	0.66955	0.99184	1.1614	0.90956	0.777704	0.851806	0.794	0.64294	0.71655	0.7167
1.10092	1.26774	0.97523	0.90729	1.09116	0.82389	1.0961	0.98881	1.0096	0.643741	0.852886	0.671442	0.97151	0.80784	0.84405
1.44004	1.05916	1.05433	1.0245	1.00622	0.60054	1.10459	0.99385	1.13043	0.784112	0.793379	0.707665	1.01267	0.93093	0.90693
1.16445	1.08251	0.93168	0.85377	0.95461	0.86444	1.13093	1.12855	0.96447	0.482198	0.876006	0.70734	0.74042	0.61618	0.8739
0.9908	1.07632	0.64582	0.92713	1.10741	0.85026	0.86542	0.76553	1.16515	0.844389	0.809644	0.787927	0.88098	0.75726	0.84935
0.92648	0.93175	0.84125	0.95737	0.88827	1.00742	0.76403	0.97264	0.9335	0.623742	0.690387	1.10523	0.54521	0.81869	0.78464
1.42656	0.57736	0.85123	1.02324	0.71028	0.81179	0.91451	0.96286	1.07409	0.73085	0.505171	0.685355	0.87817	0.90614	0.93118
1.066	0.92603	1.22187	1.07877	0.93445	0.90349	0.97672	0.87912	1.11638	0.741226	0.846993	0.648712	0.90575	0.83137	0.72198
1.24942	1.20269	0.66094	0.95039	0.72741	0.6975	0.89045	0.95369	0.86559	0.567405	0.318248	0.970011	0.81773	1.03707	0.85103
0.89981	1.0443	0.57146	0.83739	1.17643	0.95366	1.02738	1.22673	1.11745	0.812917	0.69065	0.719054	0.6662	1.03151	0.80505
0.70437	1.16033	1.08672	1.07785	0.65634	1.03086	0.96703	1.08945	0.14879	0.91383	0.557416	0.693292	0.66808	0.66978	0.90382
0.74041	0.9396	1.15673	0.89985	0.97647	1.03973	1.08862	1.00728	1.03112	0.469266	0.912539	0.547924	0.86578	0.90455	0.84035
0.94223	0.80765	0.86023	0.51929	0.74103	1.22694	0.9495	0.90472	1.24226	0.8138	0.838353	0.841077	0.6267	0.79537	0.94084
0.34755	1.06787	1.04971	0.97549	1.17831	0.6461	0.87099	0.79808	0.69131	0.790392	0.763914	0.491065	0.61444	0.83122	0.71581
0.54097	1.17001	0.9001	0.81451	0.91119	1.01274	1.12553	1.06709	1.00365	1.00208	0.698514	0.97969	0.88837	0.88747	0.8861
0.99504	1.11229	1.00993	1.03058	0.95241	0.92824	0.96134	0.92901	0.84018	0.977104	0.764756	3.53805	0.87043	0.98934	0.87805
1.06232	0.91591	1.06352	0.77531	0.84331	1.02268	1.02741	0.99514	1.03052	0.659286	0.778465	0.712597	0.86199	0.92039	0.61586
1.0105	1.12965	1.20017	0.94704	0.86429	1.10091	0.91514	1.08852	1.15664	0.82864	0.83764	0.880661	0.75317	0.90489	0.81587
1.03585	0.72769	1.18821	0.57754	0.99844	0.97881	1.12563	1.05329	0.97136	0.666159	0.869413	0.44696	0.74675	0.62637	0.78027
1.1115	0.89657	0.99308	1.03343	0.90574	0.45819	0.55044	1.12307	0.70028	0.61297	0.681114	1.09662	0.85732	0.80368	0.5941
1.02137	1.04533	1.10053	1.23185	0.79689	1.132	0.64683	0.62634	0.68526	0.701534	0.827654	0.987585	0.98678	0.91242	0.6106
0.95124	0.96365	1.13715	1.1513	0.99898	1.13622	1.09939	0.76372	1.21067	0.641706	0.570696	0.543612	0.92479	0.61114	0.75421
1.04289	1.14299	1.07405	1.07106	1.19274	0.81691	0.85259	0.81878	1.02045	0.692503	0.736408	0.672908	0.89311	0.81974	0.81813
1.04398	0.85673	0.95958	1.31746	1.19635	0.75103	0.92852	1.21101	0.85117	0.479135	0.891623	0.869982	0.86186	0.84509	0.6673
1.01979	0.90129	0.98775	1.05437	0.83889	2.21162	0.85539	0.98559	0.91399	0.957265	0.444872	1.15707	1.10378	0.78267	0.66788
1.07221	1.11176	1.06568	0.9194	0.82887	0.97378	0.84688	1.01052	0.77853	0.633214	0.892384	0.766786	0.74237	0.81666	0.6743
1.16428	1.00891	1.00807	1.05664	0.80016	0.94899	0.72452	0.91059	0.76821	0.984083	0.684127	0.580057	0.86656	0.93738	0.6756
1.00171	0.95522	1.06879	1.0792	0.78223	1.00316	0.72069	0.75391	1.24222	0.83191	1.49873	0.771283	0.88295	0.40544	0.60161
0.99684	1.15696	1.01255	0.98869	0.97234	0.83834	0.39186	1.16994	0.47474	0.859437	0.926494	0.705788	0.91654	0.79012	0.77844
0.86894	0.69521	0.98873	1.01513	1.04719	1.03803	1.08558	0.79369	1.24027	0.888324	0.780388	0.6982	0.75861	0.84197	0.82262
1.12429	1.00969	1.10134	1.01903	0.90479	0.79302	0.89257	0.7107	0.84866	0.458731	0.837133	0.777811	0.70552	2.90014	0.73
0.87082	1.02104	1.03743	0.95751	1.16076	0.9043	0.85734	0.97869	1.21445	0.564466	1.42075	0.645315	0.73548	0.8561	0.94398
1.10619	0.97082	1.054	1.08853	0.95161	0.78763	1.24163	0.841	1.10127	0.480212	0.561139	1.5497	0.83988	0.79107	0.85687
0.94283	0.92819	1.01968	1.07973	0.56404	0.86487	1.11164	1.00445	1.0302	0.755112	0.707579	0.73397	0.90389	1.04697	0.77967
0.6718	0.96424	1.24707	0.94972	0.81236	1.09116	0.94531	0.99892	0.85765	0.578341	0.845796	0.754107	0.77684	0.59075	0.89587
1.08364	0.8481	1.10363	1.00597	0.93163	1.04076	1.01093	0.89047	0.97569	0.77076	0.807634	0.582872	0.76634	0.78257	0.6569
0.71771	1.0353	1.08032	0.98601	1.06287	0.72882	0.7549	0.88074	1.09111	0.827324	0.4599	0.939242	0.65998	0.48552	0.69018
1.06579	0.70212	1.08546	0.97986	1.02107	1.01391	0.81781	0.77447	0.84069	0.628969	0.656431	0.593279	0.75367	0.9414	0.69291
1.06411	0.90887	1.12279	0.99309	0.99418	0.64848	1.24434	0.70236	0.75146	0.586015	0.930079	0.83875	0.84814	0.84679	0.75676
1.13776	0.94534	1.02203	1.01261	1.03801	0.88123	1.00899	0.76698	0.90348	0.548318	0.738551	0.880028	0.98156	0.86544	0.92144
0.92385	0.98363	0.9036	0.69355	0.85387	1.08573	0.69903	0.97999	1.01507	1.27141	0.804234	0.708621	0.75269	0.79117	0.61306
1.09088	0.97191	1.05499	0.55336	0.66766	1.01782	0.929	1.01827	0.65141	0.48484	0.730671	0.711243	0.87377	0.88431	0.78847
1.11095	0.86627	1.03618	0.97669	0.73132	0.81858	1.049	0.85122	0.53348	0.853016	0.58468	0.907401	0.69032	0.72816	0.71365
0.83474	1.00046	0.81672	1.0203	1.1144	0.8986	0.86687	0.93197	1.03294	0.743886	0.669867	0.823673	0.79431	0.66515	0.87339
0.94628	1.09134	0.8089	1.13277	0.87438	0.64794	0.8411	1.00038	0.83419	0.719373	0.812613	0.778871	0.89896	0.88311	0.76869
0.79733	1.11588	1.29751	0.77737	0.88263	0.83704	1.00861	0.75632	1.17605	0.705766	0.646978	0.413746	0.76014	0.98288	0.87433
0.9789	0.58865	1.27729	1.09751	0.76478	1.02455	1.03974	0.66342	1.0267	0.823991	1.01498	0.768247	0.84738	0.85229	0.78287
0.58737	0.9189	1.08312	0.94989	0.84655	0.84958	0.86418	0.59476	1.13487	0.921195	0.743748	0.625759	0.67821	0.75792	0.80334
0.92914	1.01336	0.89202	1.00371	0.51547	0.80099	1.06998	1.25763	0.73536	0.449862	0.487371	0.706038	0.8043	0.81819	0.78068
1.04209	1.2137	0.91054	0.88558	1.01225	0.99148	0.83636	1.01794	0.74606	0.439887	0.902451	0.710453	0.91549	1.03789	0.65591
1.13382	0.99493	1.05442	0.61378	0.99296	1.15913	0.67157	0.98462	1.03985	0.292049	0.747853	0.804532	0.61954	0.79217	0.72049
0.86735	1.16651	1.14232	0.69025	0.88978	1.12662	1.02202	1.24562	1.14796	0.79311	0.538917	0.973073	1.37768	0.83803	0.70134
1.1567	1.06038	0.99116	0.96234	0.8235	1.15726	0.9811	0.97647	0.95518	0.850166	0.71977	0.940336	0.99275	0.68458	0.79306
1.20288	0.8322	0.82909	0.83748	0.97103	1.07998	1.05487	1.069	0.32549	0.808996	0.68196	0.602667	1.00026	0.8764	0.90287
0.78766	0.81408	1.06247	1.10307	1.00552	1.01018	1.05993	1.06744	0.74646	0.689107	0.778689	0.775545	1.01881	0.87115	0.58953
1.261	3.60865	0.99505	0.98669	1.01785	0.96256	0.69716	1.29608	0.83724	0.443288	0.506693	0.79305	0.83214	0.8537	1.01196
1.098	1.03305	1.07974	0.98155	1.08544	0.73004	0.84846	1.09972	0.74332	0.842877	0.475805	0.858661	0.99838	0.77953	0.93785
0.80965	1.13022	0.981	0.63111	1.16254	1.01098	3.30944	1.04393	1.10987	0.904615	0.923721	0.8549	0.96214	0.70136	0.81067
0.78235	0.40018	1.00991	1.08813	1.00057	1.00822	0.72885	0.6944	0.99536	0.462043	0.813469	0.739098	0.9191	0.57573	0.76114
0.8929	0.90408	1.13727	1.07156	0.60547	1.13183	0.64993	1.15948	1.04934	0.894361	0.432708	0.799371	0.95014	0.88606	0.58284
1.13638	0.92357	0.94082	0.96329	0.87029	0.66082	1.09788	0.98802	1.09555	0.756715	0.910907	0.966171	0.88367	0.89322	0.9298
1.08769	0.87045	0.83597	0.77495	1.00082	1.01165	1.11022	0.92874	0.91468	0.719684	0.561032	0.789798	0.86695	0.59975	0.63546
0.74947	0.90525	1.13288	0.98282	0.9996	0.93052	0.89075	1.06215	1.12196	0.597523	0.761433	0.77536	1.07798	0.73302	0.90014
2.64071	0.93193	1.08614	1.01979	0.96587	1.06541	0.62364	0.8138	0.90129	0.846764	0.948087	0.756679	0.93679	0.7021	0.62172
1.09228	1.26707	0.68607	1.14819	1.00331	0.86809	0.97228	1.05887	0.97634	0.76329	0.935898	0.731636	0.8955	0.82885	0.9808
1.05562	0.95046	0.99925	0.84193	1.14161	1.03588	1.00509	0.92876	0.63376	0.909704	0.0999459	0.656363	0.67391	0.7077	0.50543
1.07183	1.07491	1.33465	1.08077	0.85495	0.90779	0.94999	0.94305	0.98812	0.637001	0.683726	0.694801	0.62282	0.90775	0.77048
1.00151	1.00556	0.9171	0.76196	1.24859	0.63373	0.85394	1.14428	1.07835	0.896999	0.743855	0.743934	0.84342	0.79636	0.84321
1.04994	0.79773	0.79195	1.05427	0.85616	1.09177	1.00343	0.67254	1.12894	1.04285	0.755509	0.816173	0.87819	0.92177	0.73721
1.05343	1.02534	0.71053	0.8593	0.98904	1.1247	1.11227	0.4998	0.78548	0.767124	0.52572	0.995785	0.88316	0.90921	0.93968
1.03366	0.92165	1.08828	1.00057	1.24142	0.83858	0.76601	0.9428	0.98593	0.55238	0.611159	0.769814	0.64776	0.50836	0.80185
1.077	0.98282	1.17474	0.9731	0.99962	1.04538	1.15927	0.88318	0.85358	0.632948	0.800548	0.883703	0.81216	0.8352	0.89004
0.91457	1.20465	1.06271	0.99839	1.31616	1.19113	0.99098	0.94154	0.71623	1.41644	0.676159	0.514481	0.73207	0.7721	0.76887
0.67164	0.97024	0.87667	1.0789	1.09378	1.01946	0.83945	0.9792	0.81238	0.692013	0.791419	0.770714	0.91201	0.96247	0.82578
0.99493	0.94068	1.19406	1.17621	1.17597	0.93344	0.97707	0.89688	1.02906	0.755721	0.672996	0.884364	0.73501	1.0565	1.62734
0.96047	1.11886	1.06782	1.10336	1.01997	1.11558	0.90028	1.09298	0.66021	0.848094	0.834525	0.732397	0.7204	0.85095	0.92779
1.17485	1.03903	0.88087	0.85549	0.8429	0.6774	0.96902	1.06167	1.09952	0.80257	0.391138	0.386709	0.74047	0.77043	0.81529
1.30993	0.79477	1.12545	0.64521	1.12604	1.03639	0.88424	0.87782	1.15051	0.315311	0.739035	0.376433	0.88187	0.79569	0.66165
1.16769	0.51576	1.07346	0.85637	1.01918	1.01098	0.8246	0.82461	0.64274	0.758414	1.09193	1.0197	0.75422	0.71228	0.76085
1.0311	0.96179	0.53531	0.73235	1.05175	0.89695	0.90521	0.87775	0.84531	0.866794	0.905846	1.15251	0.80972	0.55546	0.41789
0.95398	0.98412	0.47237	1.0217	1.1529	1.02696	0.90555	0.83422	0.86358	0.814972	0.674796	0.909048	0.79559	0.84154	0.744
1.05707	0.96199	0.89278	1.15619	0.97591	0.80664	1.05962	0.90404	0.91892	0.779925	0.85653	0.566654	0.85065	0.86436	0.89805
0.84842	0.5736	1.02705	0.85286	1.04793	1.01248	0.83402	1.17339	1.00201	0.547744	0.475437	0.4347	0.94732	0.75131	0.63154
0.42333	1.05761	1.15358	1.03431	0.89973	1.06715	0.73861	0.63556	0.8054	0.774722	0.440503	0.588301	1.07767	0.85988	0.54282
1.08955	0.93731	0.74732	0.9886	1.13999	1.23979	0.73261	1.02962	1.00082	0.61325	0.573943	0.716555	0.90144	1.07886	0.92401
0.76013	0.5982	1.12264	0.88357	0.76387	1.07364	0.905	1.02875	0.91465	0.842906	0.887381	0.75439	0.9793	0.86024	0.91865
1.06865	1.02685	0.97533	0.55598	0.7589	0.87404	0.87766	1.06291	1.01583	0.81577	0.812868	1.312	0.94145	0.90996	0.91193
0.69751	0.98779	0.88651	1.07429	0.85477	0.99053	1.05933	1.06611	0.90274	0.891064	0.827837	1.04568	0.86523	0.8589	0.66807
1.20443	1.14201	0.87894	0.57848	0.9137	0.71125	1.00678	0.94315	0.98737	0.45862	0.419444	0.808335	1.14732	0.93646	0.81656
0.93727	1.03	1.20903	0.76918	0.78923	1.02081	0.89467	1.06791	0.96115	0.849726	0.821119	0.913882	0.9324	0.80293	0.47193
1.2388	0.51663	1.02721	1.01277	1.22449	1.0032	1.07162	1.15274	1.0591	0.860369	0.964943	1.26407	0.99565	0.79975	0.88649
0.88379	0.76478	1.00928	0.82899	0.78625	0.85643	1.01562	0.7571	1.14611	0.607244	0.675839	0.830259	0.54586	0.69388	1.11666
0.97244	0.83569	0.90012	0.96267	0.66624	1.14038	0.93885	0.36765	0.81189	0.814239	0.973825	1.03768	0.84919	0.70503	1.50697
1.01851	1.00494	1.0284	1.0144	0.96885	0.8764	0.90076	0.97248	0.57822	0.645209	0.664685	0.80797	0.87974	0.80261	0.93853
1.01611	1.08971	0.77274	1.20145	0.77823	1.22419	0.93673	0.75228	1.06006	0.757675	0.824222	0.9017	0.74703	0.52639	0.72483
0.8811	1.08587	0.81203	0.95238	0.99671	0.95592	0.72644	0.88953	1.17216	0.760269	0.49566	0.472972	0.72373	0.38836	0.71491
1.04717	0.99649	0.99772	0.92905	0.91632	0.81711	0.91628	0.98281	1.15299	0.518227	0.627689	0.988012	0.76247	0.98846	0.8287
0.8165	0.93343	1.10673	0.91586	1.05265	0.9075	1.08844	1.07728	0.66547	0.83079	1.1091	0.949896	1.00006	0.90484	0.32074
0.82063	0.95877	0.96779	0.88277	1.14548	0.95611	1.13916	0.8878	0.68313	0.476049	0.363387	0.517933	0.94081	0.93293	0.79651
1.13402	1.08203	0.92167	1.05039	1.05633	0.98895	1.2212	0.99963	1.21703	0.654777	0.674681	0.797609	0.83298	0.81018	0.81298
0.65299	0.88321	1.18237	1.04237	0.97567	0.88605	0.85848	1.05645	0.89403	0.793864	0.917597	0.752377	0.843	0.95737	0.78101
1.14305	0.79753	1.09209	1.11696	0.95248	1.1375	1.08221	1.11027	1.00427	0.673332	1.24013	0.623982	0.83352	0.67461	0.58088
0.45986	1.18644	0.95237	0.91739	0.95364	0.99102	0.95028	0.44029	1.00635	0.802758	0.904049	0.917072	0.84813	0.98063	0.86429
0.99817	0.75036	1.00051	0.76537	1.12001	1.15616	0.85216	0.95898	0.98697	0.816712	0.195316	0.575535	0.75879	0.79153	0.88634
1.1063	1.06099	1.09306	0.97305	0.6432	0.8782	0.75416	0.66509	1.12787	0.739287	0.763944	0.737169	1.30837	0.91033	0.83858
1.11193	0.91298	0.98309	0.83112	0.92674	0.99176	1.0318	1.061	0.6056	0.713043	1.00822	0.645695	0.72701	0.80372	0.94847
1.0057	1.30614	1.1066	0.99283	1.02589	1.09768	0.87984	0.91535	0.8781	0.407342	0.773749	0.714807	0.88465	0.69852	0.68053
0.67587	1.10782	1.11046	0.62408	0.81492	0.99408	1.02738	1.09649	1.18019	0.596921	0.82801	0.628482	1.07083	0.7403	0.83949
0.98795	0.78258	0.98881	0.96299	1.15528	0.41974	0.65903	0.85578	0.7105	0.436195	0.701621	0.747677	0.9288	0.94891	0.80361
1.14325	1.07912	0.99327	1.00847	1.09959	0.9426	1.21243	0.97806	1.13968	0.776164	0.674566	0.83886	0.95055	1.25939	0.76857
0.89538	1.03943	1.10798	1.05948	0.89102	1.04401	0.84202	0.67947	0.98832	0.623191	0.871503	0.727353	0.91937	0.66668	0.80717
0.94445	0.95089	1.16697	0.75702	1.02383	1.07394	0.88107	1.22747	1.05984	0.350942	0.728535	0.787397	0.97014	0.73236	0.96577
0.92421	0.67754	1.02335	1.0061	1.09753	0.94675	0.95435	0.98413	0.60507	0.923688	0.465024	0.798186	0.75275	0.77434	0.77542
0.67536	0.96835	1.0652	0.99135	0.63768	1.02457	1.07645	0.87831	1.10315	0.638387	0.431386	0.662068	0.90358	0.6707	0.81722
0.95669	0.49358	0.61723	0.77476	0.9391	0.78568	0.80683	0.68099	0.65617	0.253662	1.00262	0.919276	0.81919	0.83259	0.75889
0.8941	0.8804	0.86669	1.01054	0.99746	0.9221	0.93056	1.05299	1.03993	0.820554	0.67099	0.650134	0.96933	0.83415	0.78323
1.09391	0.84751	1.12391	1.00961	0.74776	1.02906	1.01898	0.88135	0.99592	0.626622	0.884471	0.820984	0.63971	0.77249	0.52486
1.04792	0.9649	1.27682	0.80194	0.9153	1.01128	0.75855	1.02633	0.82655	0.646183	1.47652	0.844621	1.0164	0.95187	0.70922
0.96936	1.07345	0.82878	0.90022	1.02577	1.03771	1.08236	0.86502	1.04232	0.652024	0.374186	0.55304	0.42201	0.60176	1.08904
0.75977	1.1154	1.06089	0.97354	0.9116	1.09634	0.91873	1.17087	0.6272	0.829724	1.12856	0.804397	0.37184	0.77415	0.7764
0.93159	1.05715	0.98247	1.05837	0.89142	0.99711	1.10357	0.40803	1.07264	0.856408	0.633954	0.839263	1.01864	0.89379	1.00861
0.66072	1.09159	0.97207	1.09049	0.75633	1.11732	0.68016	0.71128	0.86742	0.462226	0.629336	0.784962	0.80152	0.76346	0.79342
1.16583	0.84507	0.74344	1.33823	0.61922	0.86538	1.11224	1.28751	0.86037	0.491016	0.650014	0.618167	0.56324	0.88577	0.77432
0.83774	1.0534	1.15175	0.69441	1.01934	0.86873	1.06095	0.90019	1.16993	0.395282	0.939813	1.01566	1.02219	0.75715	0.96283
1.16234	0.70231	0.73674	0.85525	0.59166	1.0516	0.55842	1.04837	0.96327	0.647188	0.810723	0.676362	0.96647	0.81522	1.0094
0.95837	1.2566	0.70834	1.02316	1.02428	1.01258	0.92393	0.91417	1.51161	0.422396	0.749705	0.92555	0.82952	0.87546	0.58333
0.91922	1.12758	0.39775	0.99343	0.85708	0.93696	0.91062	0.77	0.94063	0.943641	0.64951	0.958583	0.89309	0.73904	0.88187
1.19257	0.99945	1.11772	1.12298	1.14189	0.53375	1.03607	0.53237	1.2744	0.546399	0.715316	0.249212	0.87343	0.818	0.77975
1.11075	1.14884	1.04994	1.00268	0.59586	0.943	0.99265	1.04193	0.94993	0.594464	0.618235	0.927679	1.00256	0.90129	0.70794
1.02247	0.97268	1.11814	0.78013	0.88936	1.21852	0.88275	0.96419	0.92305	0.585175	0.584781	0.714123	0.82888	0.78938	1.00564
0.78935	1.04098	0.94234	0.69078	0.78169	0.91107	0.90815	0.83563	1.13425	0.633737	0.737044	0.718033	0.85501	1.037	0.96065
1.12369	1.25783	0.54596	0.86218	1.04234	0.9916	1.11864	1.05539	0.85654	0.614881	0.653003	0.835302	0.72253	0.8508	0.62995
0.93908	1.14073	0.71585	1.20005	1.04161	0.97162	1.04813	1.12186	1.06671	0.397224	0.35163	0.627755	0.86123	0.68178	0.30217
1.16414	0.98204	0.87068	1.02204	0.86184	1.04076	1.10098	0.95211	0.71083	0.930988	0.699181	1.06492	0.88316	0.81883	0.62826
1.16266	0.85064	0.99689	0.90524	1.0414	0.92627	1.16729	0.91876	0.95089	0.507478	0.832846	0.825909	0.5569	1.02593	0.96192
1.00271	1.06137	1.04595	1.01098	1.13681	0.73645	1.14402	1.01704	0.97133	0.884733	0.635403	0.419478	0.69419	0.94359	0.74179
0.9839	0.77181	0.903	0.918	0.70722	1.03314	0.84979	0.93681	1.05529	0.685452	1.20585	0.706587	2.48812	0.89323	0.94223
0.98684	1.16622	1.06228	1.0261	0.83883	1.05351	0.75823	0.94863	0.79028	0.978209	0.436264	0.988386	0.79583	0.86446	0.85364
1.12117	1.08788	2.27795	0.75393	0.96405	0.95733	0.87186	1.00685	0.99719	0.733154	0.884349	0.625634	0.75198	0.87847	0.86696
0.85202	4.44042	0.99575	0.72101	0.85032	0.99637	1.13919	1.14662	1.00801	0.844071	0.563801	0.83029	0.64032	0.88413	0.53399
1.06056	1.03037	1.0734	0.83443	0.7407	0.90523	0.64579	1.12881	0.99176	0.446042	0.577765	0.776436	0.98714	0.87438	0.68766
0.74885	0.99672	0.95935	0.7578	0.7692	1.06241	0.98598	0.99328	1.15875	0.590837	0.683347	0.732467	0.91373	0.87725	1.02449
0.91032	0.8025	1.00878	0.99663	0.97682	1.06915	0.81022	1.11579	0.88039	0.574614	0.543816	0.641143	0.91305	0.92312	0.85616
0.90672	0.92874	0.98669	0.82719	0.93387	0.88738	0.88829	0.68386	0.83229	0.700023	0.82504	0.900559	0.81445	0.58821	0.92467
0.95674	0.99775	0.99572	0.92091	1.00256	0.80463	1.08181	0.9703	0.83187	0.676687	0.831615	0.582537	0.89395	0.65875	0.61963
0.9412	1.09417	1.12399	1.0731	0.96666	1.05243	0.87793	0.68114	0.78813	0.697628	0.836298	0.956498	0.61004	0.615	0.91506
0.95418	0.6758	1.13173	0.85722	0.46733	1.11181	1.02272	0.85122	1.17608	0.786002	0.658569	1.04268	0.92401	0.88215	0.75616
0.93849	1.08781	0.93727	1.10474	1.11477	0.83668	1.10346	0.9543	1.19635	0.53745	0.615258	0.956922	1.17071	0.81403	0.91551
1.02575	1.08143	1.2803	0.83832	0.75348	0.89907	0.99062	0.9009	0.96994	0.727617	0.867803	0.847711	0.99999	0.80917	0.88204
0.76077	0.88721	0.97665	0.8626	0.74057	0.91559	0.58267	1.12213	1.04699	0.911601	0.878251	0.674705	0.84817	1.14918	0.57463
1.21396	1.01212	0.241	1.1349	1.11757	1.00883	0.8638	1.17775	0.79566	0.799329	0.636679	0.832426	0.21438	0.64162	0.5893
0.77855	0.72642	1.1852	0.92519	0.71522	0.93793	1.01903	0.97877	0.95869	0.576287	0.295387	0.975778	1.02265	0.59153	0.90604
0.90062	0.52449	0.7681	0.86719	1.09176	0.91025	1.12423	0.92776	0.97278	1.06857	0.403198	0.482307	0.86861	0.72125	0.59362
1.11102	0.76404	0.78892	0.87532	0.73685	0.89764	0.80706	0.88309	0.92569	0.785086	0.487936	0.80007	0.69395	0.72258	0.56309
1.00931	1.02383	1.11263	0.8386	0.98052	1.04302	1.09512	0.77866	0.6251	0.607892	0.570035	0.569621	0.8671	0.85147	0.85736
1.24205	1.40155	0.98864	1.03084	0.91352	1.18568	0.73762	0.73677	0.85615	0.745291	0.9305	0.904791	0.87545	0.81723	0.69381
0.9227	0.89055	0.87986	0.58871	1.02534	1.10151	0.85076	0.64048	0.9983	0.382095	0.558879	0.814456	0.80816	1.10379	0.70281
0.8106	1.15509	0.60086	1.10819	0.77605	1.61891	0.96509	1.02787	1.21611	0.983349	1.17461	0.830812	0.88378	0.82876	0.82275
1.01236	1.03307	0.79232	0.98313	0.93639	0.95628	1.05439	0.90578	0.8158	0.896341	0.722547	0.74313	0.80348	0.8115	0.32369
1.07577	0.92044	1.09964	0.84996	0.9328	0.83806	0.61964	0.77792	0.80315	0.58747	0.913293	0.887226	0.81889	0.59052	0.97663
1.04036	1.18285	0.99641	1.02207	1.07982	0.98564	1.0242	0.84836	0.88353	0.876496	0.967273	0.518791	0.65827	0.77162	0.83625
0.85626	0.92122	1.03225	0.84186	0.96955	1.08456	0.96557	0.91694	0.89436	0.552425	1.27954	0.706299	0.81242	0.57376	0.88009
1.0732	0.90077	1.08101	1.10023	0.79711	1.01279	0.6753	1.03454	0.93196	0.412281	0.705771	0.824479	0.9753	0.40237	0.6834
1.06985	1.02096	1.37017	0.78938	1.1581	0.9888	0.85743	0.75658	0.87012	1.29899	0.511543	0.719725	0.96332	1.97811	0.74738
1.02064	0.98208	1.02381	0.70928	0.81482	1.03671	0.99647	0.8809	0.8837	0.578579	0.666831	0.500132	0.91049	1.05198	0.80632
1.19366	1.23359	1.02766	0.99721	1.00186	0.97402	1.10698	1.08649	0.87444	0.651803	0.612964	0.470683	0.99658	0.57067	0.82348
0.93078	0.59706	0.9164	0.95501	0.88628	0.76363	0.61765	1.03451	1.14608	0.47822	0.356991	0.711898	0.8565	0.70577	0.63375
0.85839	0.81114	0.89594	1.06217	0.84863	0.91517	1.11249	0.94499	1.00041	0.370535	0.77916	0.948591	0.87565	0.79481	0.68111
1.00121	0.85274	1.03416	0.98716	1.0023	0.95973	1.87874	0.99939	1.34151	0.718065	0.759349	0.613152	0.80768	0.91471	1.10619
0.8628	1.23461	0.66677	1.0296	0.97857	1.11283	0.92978	0.89284	0.96326	0.700867	0.714795	0.505842	1.06602	0.74999	0.71355
0.96241	0.94972	0.45154	0.90866	0.90191	0.99946	1.17293	0.9778	0.93613	0.767166	0.86951	0.886462	0.88185	0.88092	0.59051
1.03934	1.14301	0.94924	0.85789	0.48597	0.97304	0.85096	0.92923	0.99973	0.960687	0.757352	0.71144	0.73318	0.9143	0.88371
0.66378	1.21558	0.88098	1.00182	1.02979	1.18424	1.01385	0.65314	0.66479	0.830909	0.623163	0.917076	0.7147	0.9084	0.66348
0.92546	1.01279	1.01193	1.02746	0.97647	0.98346	0.90447	1.10118	0.51119	0.844898	0.692497	0.854747	0.77365	0.63165	0.67141
0.84362	1.03101	0.59631	1.12357	0.91833	1.39209	0.8286	1.03473	0.76622	0.90508	0.839452	0.663819	0.83769	0.77847	0.92069
0.28311	1.0504	0.99964	0.42447	0.74408	1.08753	1.05637	1.03558	0.91522	1.13211	0.83671	0.466281	0.8003	0.80038	0.86562
0.93469	0.96163	0.82884	0.91243	0.91685	0.87019	0.89386	0.9998	1.14503	0.68892	0.939364	0.670331	0.85143	0.83599	0.86437
1.00415	3.35689	1.09646	0.80726	1.09181	1.09161	0.93066	0.53217	1.10679	0.677291	0.819856	0.645689	0.86676	0.66162	0.76857
1.0367	0.73515	1.10384	0.80072	0.98333	0.90359	1.29433	0.83429	0.31709	0.690294	0.89646	0.526417	0.9155	1.02437	0.86511
0.99723	1.12117	0.84472	1.01747	0.88423	0.87642	1.00183	1.28664	1.10269	0.777761	0.891148	0.669132	0.94034	0.7528	0.83609
1.13052	0.98909	0.95799	1.04832	1.01366	0.87706	0.86101	1.06254	1.05009	0.711466	0.631228	0.663325	0.65212	0.78244	0.84062
1.02915	1.10347	0.98068	1.29416	0.90232	1.07646	0.79812	1.09842	1.00055	0.889925	1.01513	0.725725	0.8494	0.90477	0.43781
0.91438	1.03239	0.96544	1.03252	1.12272	1.0518	0.93633	0.93373	0.80724	0.596524	0.845884	0.784344	0.64188	0.91679	0.67946
0.99023	1.23802	0.75244	1.03149	0.94896	0.79629	0.68504	1.41134	1.07352	0.825732	0.491248	0.600175	0.82714	0.72975	0.62946
0.92148	0.99497	1.07127	0.90958	1.41895	0.84811	0.66067	0.92323	1.05281	0.830566	0.739577	0.903956	0.83446	0.77627	0.81227
1.10528	0.91189	1.00164	1.01987	0.93022	0.77481	1.05943	1.05471	1.0622	0.550822	0.598295	0.972766	0.95306	0.76158	0.61876
1.01433	0.99843	1.01628	0.90662	1.07617	1.65315	0.7986	0.80557	0.91858	0.901813	0.692243	0.836549	0.77181	0.95995	0.86048
1.03957	0.93692	0.94557	0.94554	0.82053	1.00027	0.82999	0.86147	1.03999	0.601516	0.963252	1.01968	1.04967	0.80982	0.82681
1.17007	0.57837	0.97304	0.88032	1.0066	1.13987	1.08871	1.11621	1.09932	1.05099	0.833667	0.792748	0.94301	0.76123	1.01351
1.05153	1.02824	1.04494	1.03113	0.96426	0.82071	0.61352	0.93002	0.84333	0.843348	0.481537	0.658232	0.95553	0.77253	0.83858
1.17698	0.8421	0.97592	0.68884	1.02178	1.0236	0.96843	0.97216	0.97676	0.806686	0.839503	0.72255	0.77729	0.86213	0.78881
0.84652	0.92599	1.0408	0.9929	0.99305	0.98086	0.94383	1.01132	0.70987	1.22386	0.733021	0.722572	0.9336	0.8975	0.52796
0.97447	1.01678	1.13886	0.71953	1.04695	0.7695	1.02463	0.95745	0.86331	0.763551	0.978866	0.914484	0.57514	0.68019	0.88689
1.10064	0.78816	1.03274	1.14871	1.07766	0.78175	1.16566	0.52744	0.93434	0.836286	0.791032	0.8364	0.9022	0.79831	0.67157
0.92225	1.02023	0.84571	0.85809	0.96349	0.98377	0.67706	0.97991	1.04195	1.06644	0.703181	0.629486	0.93123	0.53203	0.90761
1.04873	1.24341	1.05853	0.56817	0.86034	0.9079	1.00569	1.03366	0.89899	0.774556	0.6672	0.853872	0.74281	0.88483	0.46359
1.01647	1.25752	0.90835	0.86367	0.9547	1.04166	1.07754	1.03024	0.81823	0.694641	0.692644	0.718383	0.94647	0.72753	0.84675
0.75461	0.9491	1.28779	0.86906	1.02478	0.98204	0.83629	0.9638	0.7579	0.673322	0.721015	0.51623	0.83624	0.74121	0.60121
1.08659	0.91565	1.0061	1.02057	0.5299	1.11403	0.85052	0.9279	1.04179	0.387704	0.77861	0.710548	0.91867	0.67091	0.88044
0.83655	0.98015	1.11431	0.87899	1.15158	1.0817	1.03232	0.87555	0.99766	0.566229	0.936694	1.21303	0.90886	0.87837	0.87045
1.13062	0.98576	1.03642	1.03534	0.85251	1.1257	0.96755	0.99778	3.27436	0.422	0.528182	0.892894	0.91934	0.8563	0.6404
0.95005	1.14123	0.81393	0.92699	0.80852	0.94092	1.02572	0.8082	1.05333	0.600096	0.462547	0.749549	0.66085	0.79128	0.88109
1.2169	1.08555	1.04262	0.84911	1.24513	2.81702	0.68092	1.01585	0.85829	0.943628	0.756505	0.350362	0.96024	0.93504	0.75717
0.80305	1.10047	0.97287	1.01606	1.06681	0.98912	1.1063	0.91035	1.12545	0.890418	0.927623	0.73277	0.63502	0.92953	0.81423
1.12662	1.05937	1.05648	1.19204	0.88423	0.99229	1.17035	1.02566	0.93562	0.860304	0.553434	0.627999	0.53703	0.35056	0.53832
0.91087	0.72935	1.00115	0.87713	0.80272	1.11125	1.0649	0.94531	0.91582	0.554909	0.592336	0.908697	0.40897	0.9501	0.99484
1.10708	1.1539	0.92646	1.1851	1.00018	1.02363	1.12911	1.04748	0.95741	0.462448	0.876628	0.487059	0.83569	0.58421	0.76625
0.98303	0.86429	0.9129	1.42186	0.95279	0.96891	1.05273	0.81767	1.04542	0.703005	0.571391	0.57916	0.56616	0.40628	0.66734
1.12732	1.04797	0.65258	0.80489	0.93066	0.92983	0.95349	1.17316	0.85142	0.794436	0.722515	0.816146	1.12754	0.91394	0.44531
1.1272	0.29949	1.04156	1.12623	1.05433	1.13669	0.67843	1.04074	0.87425	0.566428	0.426836	0.609396	0.73636	0.90692	0.89135
1.08965	0.71095	0.65086	1.0847	0.63667	1.11278	1.03487	1.15498	0.96689	0.76363	0.746655	1.09562	0.77344	0.4129	0.79218
0.94489	1.28821	0.8814	0.93849	0.83516	1.06325	1.07595	0.61066	0.99027	0.934102	0.572214	1.03541	0.85891	0.92371	0.83287
1.0592	0.93104	1.05872	0.6511	0.98636	0.81785	0.81083	0.99419	0.986	0.713993	1.05456	0.977586	0.90106	0.80696	0.53919
1.20922	1.03699	1.00682	0.85565	0.87448	0.99784	1.01337	0.87917	0.9984	0.750454	0.779171	0.873809	1.06392	0.86652	0.83958
1.12561	1.09669	0.59062	0.82872	0.976	1.20552	0.69608	1.0396	0.83252	0.552706	0.731604	0.695726	0.58255	0.85466	0.73041
0.93768	1.02643	1.01145	1.12753	1.1144	0.79315	0.87472	0.81124	1.12281	0.711543	0.755397	0.955395	0.91807	0.6819	0.76425
1.04082	1.26137	1.0993	0.83017	1.02674	0.9749	0.86601	1.133	0.92132	0.737519	0.460683	0.703328	0.89292	0.82333	0.71615
0.86847	0.94744	0.98341	0.99348	0.92238	1.11831	1.05733	0.91298	1.33745	0.630786	0.956223	0.561767	0.84836	0.90011	0.56711
1.26028	0.98066	0.6626	0.87229	0.80413	0.72069	0.97155	1.09131	0.7378	0.8473	0.954844	0.982454	0.81813	0.66259	0.80396
0.90684	1.03881	1.0073	0.91338	0.51377	0.74491	1.01559	0.97528	0.80589	0.52235	0.650276	0.636411	0.79714	0.79719	0.69861
0.84079	0.97353	0.76893	1.08167	0.86029	0.36663	0.79507	1.01561	0.88768	0.770337	0.832902	0.90317	0.99242	0.9406	1.06602
0.8142	0.67957	0.83572	0.88064	0.83818		1.08851	0.83688	0.79104	0.55128	1.0136	0.658688	0.91481	0.619	0.88327
1.10962	0.75562	0.59968	1.20815	0.75072		1.11199	0.97355	1.15962	0.514579	3.4214	0.398795	0.84137	0.79574	0.79301
0.77212	1.19188	0.75964	0.96065	0.48349		1.01176	0.68463	1.03808	0.686704	0.901324	1.66087	0.90561	0.89394	0.84195
0.82108	1.16525	1.10948	0.83273	0.58696		0.8366	1.10521	0.94939	0.781933	0.82513	0.912746	0.66568	0.99692	0.47636
0.96806	0.78948	1.16507	1.84357	0.91864		1.02427	1.08031	1.03861	0.521965	0.624287	0.661005	1.06953	0.8756	0.89372
1.01673	1.26226	1.02264	0.94676	1.0963		0.89186	0.90329	1.16452	0.501506	0.830755	0.998641	0.8924	1.01121	0.93012
1.18558	0.96752	0.51981	0.99243	0.50293		0.9778	0.82137	0.80742	0.828711	0.737388	0.800876	0.67893	0.80151	0.73675
1.03801	0.83589	1.14547	1.03223	0.48708		0.87491	0.77675	0.76201	0.629032	0.658632	0.273608	0.79103	0.83024	0.50246
1.15337	1.00043	0.96808	0.72829	1.1773		0.91801	1.05516	0.71573	0.906416	0.886071	0.690646	0.82994	0.43242	0.86053
1.05569	1.01405	1.10106	0.70387	1.1063		0.87375	0.8495	0.88322	1.05649	0.710733	0.851888	0.9256	0.77607	0.54273
0.7581	1.07163	0.94634	0.99094	1.05525		0.98167	0.73471	1.17562	0.860924	0.831886	1.00391	0.80955	0.97375	0.86282
0.88014	0.86782	0.38845	0.91578	0.94226		0.4748	0.91811	0.94153	0.812878	0.773282	0.828935	0.88744	0.8688	0.76338
0.99365	1.00904	1.11742	1.01858	1.00332		0.79987	0.95532	0.51809	0.948623	0.672879	0.410337	0.68402	0.93436	0.82235
1.20205	0.83862	1.08619	0.87305	1.05037		1.07989	1.08878	0.8037	1.1939	0.898162	0.782832	0.84669	0.88357	0.86354
1.18291	1.01928	0.9643	1.06219	0.76091		0.97666	0.92384	0.79276	0.504638	0.769224	0.588705	0.89998	0.63943	0.82237
0.53248	1.00838	1.07295	1.05607	1.10695		1.15268	0.81746	1.01685	0.603163	0.731598	0.433965	0.30637	0.79132	0.83113
0.76704	0.96478	1.17571	1.03653	1.06653		0.62166	1.01672	1.1655	0.744229	0.560726	1.06229	0.82383	0.62889	0.96038
1.88204	1.00445	1.03904	1.05895	1.07026		0.48512	1.20217	0.68592	0.283612	0.907449	1.06176	0.67196	0.89919	0.62535
0.98815	0.90748	0.9399	0.84183	0.83799		0.76231	0.88531	0.61697	0.51697	0.864101	0.482974	0.69377	0.67671	0.71986
0.88819	0.93671	0.8894	1.08119	1.12347		0.94823	0.97199	0.83354	1.08116	0.626022	0.960899	0.9114	0.9968	0.79729
1.10402	0.7761	1.25992	0.86848	0.61146		0.89687	0.64832	0.99728	0.721798	0.661675	0.809473	0.80969	0.88629	1.1487
0.98356	1.01118	1.00281	1.24939	0.43262		0.92087	1.03598	0.82995	0.692167	0.634757	1.07689	1.11818	0.53199	0.56347
1.27225	0.65847	0.57266	0.86662	1.01814		0.90893	1.03935	1.04671	0.577341	0.808879	0.805911	0.28409	0.96194	0.84735
1.27227	1.12204	1.00572	0.63444	0.95361		0.96314	0.86585	1.04453	0.718775	0.799317	0.853342	0.82394	0.91845	0.62193
1.03604	1.04072	0.97238	0.9301	1.06687		0.82955	0.87036	0.96036	0.489895	1.01428	0.474459	0.84538	0.73279	0.76726
0.51752	0.79241	1.04174	1.22115	1.00866		0.89387	0.89701	0.95545	0.532556	0.707163	0.595975	0.72326	0.74361	0.89471
1.03625	0.91957	0.82726	1.01156	0.65945		0.92566	0.95471	0.79422	0.609848	0.637722	0.367224	0.68308	0.88852	0.88646
0.93174	0.95122	0.93107	1.22741	1.07597		1.16037	1.07371	0.8799	1.0164	1.28974	0.890706	0.96908	0.50771	0.93505
0.97008	1.18128	1.1532	0.74975	1.19912		0.7395	0.9263	0.95027	0.531344	0.531424	0.741605	0.89439	0.99854	0.48741
1.0878	1.15707	1.18803	0.90426	0.97869		1.13166	0.99764	0.83158	0.673216	0.704561	0.845953	0.86131	0.98914	0.6494
1.01172	1.16055	1.05399	1.19834	1.01286		1.06125	1.10647	0.69837	0.610699	0.811363	0.952857	0.58235	0.90065	0.84014
0.72215	1.15555	0.8294	0.90608	1.07638		1.0307	1.00809	0.98311	0.838413	0.823436	1.12142	0.60914	0.82369	0.81203
1.0028	1.04849	1.09055	1.12861	1.10854		0.9269	1.12515	1.23209	1.17818	0.771072	0.730189	0.8325	0.89042	0.87369
0.92858	0.74467	1.18367	1.09879	1.04559		1.01111	0.93993	0.81549	0.903538	0.391963	1.16338	0.47119	0.62666	0.80026
0.8281	1.08795	1.1025	0.85288	0.94306		1.06532	1.232	1.09197	0.932005	0.464924	0.196739	0.63895	0.85005	0.52871
1.01112	1.18446	0.91337	0.71082	0.82164		0.76326	0.89774	1.0075	1.20685	0.70219	0.757134	0.99148	0.75751	0.84929
1.0702	0.79084	1.07183	1.00783	0.76703		0.9587	0.74958	0.85071	0.807172	0.678007	0.844898	0.90772	0.90094	0.8875
1.01695	1.08114	1.01727	0.93107	1.02238		1.2139	1.01318	0.76195	0.887451	0.783118	0.684317	0.68983	0.77946	0.9691
0.89057	1.0953	1.22479	0.34541	0.74936		0.87193	0.91502	0.94881	0.917425	0.801488	0.819377	0.95274	0.92922	0.7471
0.97717	0.83836	1.00516	0.96372	0.88147		0.87353	0.82831	1.00149	1.06161	0.658233	0.579023	0.73151	0.92156	0.62878
0.86587	0.9255	0.98094	0.98329	0.62866		0.72629	1.17561	1.18477	0.703265	0.874361	1.31886	0.85141	0.70859	0.86176
0.92403	0.65653	0.5073	0.93092	1.14404		0.95984	1.11133	1.01486	0.649751	0.81585	0.830756	0.85107	0.93505	0.69612
0.96738	1.06297	1.06972	1.10574	1.01037		1.12361	0.88877	1.00974	0.321496	0.7384	0.721743	0.5006	0.987	0.71217
1.01768	1.17781	1.10674	1.0355	0.94894		1.02718	1.04229	1.01345	0.750336	0.711744	0.428618	1.04666	0.85946	0.70592
0.95495	1.01023	1.08503	0.80409	0.95569		0.94473	1.2253	1.07265	0.847036	0.860225	0.804648	0.72047	0.75492	0.88751
1.0635	1.19018	1.13169	1.17342	1.00212		0.91248	1.06433	1.29823	0.69454	0.462739	0.577531	0.75009	0.64251	0.50133
0.93019	0.77257	1.04254	1.13824	0.88369		1.06235	1.06529	1.27	0.781194	0.703463	0.676671	0.74045	0.92294	0.87145
1.09819	1.08292	0.79022	0.80879	1.08471		1.23529	1.01831	0.75848	0.925501	0.538886	0.608474	0.76418	0.78513	0.8874
1.26443	0.98122	1.13871	1.15705	0.75907		0.95046	0.40113	0.86258	0.517002	0.475813	0.692237	1.05033	0.79802	0.80802
0.83774	1.0728	0.88424	0.79108	1.07895		3.9039	0.97207	1.01884	0.986422	0.746323	0.980519	0.58002	0.55047	0.76541
1.13162	1.01889	0.9946	1.03594	0.57098		1.15595	1.15128	0.9307	0.722125	0.906674	0.814679	0.78639	0.54616	0.80564
0.74784	0.59891	0.94054	0.86682	0.99116		0.38934	1.12639	1.01484	0.732715	0.82739	0.62195	1.02477	1.01025	0.69456
1.04719	1.01706	1.04226	0.96774	1.16678		0.89518	0.9009	0.83711	0.808429	0.933073	0.86486	0.75944	0.78051	0.83183
0.73306	1.03763	0.94403	1.10052	0.7897		1.13061	0.90837	1.04334	1.05114	1.08751	0.749647	0.83692	0.50977	0.84694
1.22832	1.06242	1.12287	0.83716	1.04191		0.96351	0.86166	0.93623	0.793907	0.694463	0.711922	0.8702	0.73052	0.8874
1.07436	0.53902	1.02458	1.21163	0.83324		0.8746	0.81132	1.31564	1.0229	0.759214	0.588041	0.93447	0.62	0.73236
0.74886	1.00414	1.03836	1.08135	0.88036		0.73759	1.0231	1.11708	0.653979	0.823559	0.5002	0.6273	0.84076	0.79821
1.05087	1.28902	0.68258	1.1652	0.46647		0.92357	0.88133	0.59527	0.924482	0.64544	0.627112	1.0774	0.65362	0.87841
0.97022	0.95093	0.98497	0.91658	1.20234		1.04039	0.77716	0.99505	0.72578	0.523941	0.969589	0.87389	0.72536	0.84372
1.03525	1.26002	1.0108	0.75117	0.71955		0.69628	0.96725	0.82085	0.225601	0.487922	0.571188	0.77114	0.82134	0.91261
1.00775	1.08572	1.06511	0.96165	0.92158		0.89385	1.13642	1.06902	0.796657	1.13753	0.322001	0.92631	0.83532	0.69902
0.96775	1.08284	0.74511	0.87089	0.7563		1.10334	1.20537	1.11651	0.710642	0.565469	0.441769	0.66866	0.84032	0.93348
1.14075	0.79633	0.89892	0.95583	1.04947		0.87722	1.05706	0.77833	0.965613	0.759327	0.502536	0.95676	0.65676	0.62568
1.09511	1.03767	0.89683	1.07514	0.96726		0.77645	1.06563	0.89053	0.732613	0.491647	0.708858	1.12322	0.56932	0.691
1.348	1.14718	1.03923	0.93166	0.88456		1.06309	0.83985	1.12339	0.732424	0.601634	0.700376	0.93135	0.90492	0.91371
1.23123	0.97758	0.86786	0.88925	1.15469		1.00705	1.05842	1.39367	0.503438	0.775269	0.669631	0.97607	0.45406	0.56544
0.9581	0.92067	1.24662	0.37898	0.62581		0.5522	0.45296	0.89285	0.725854	0.646444	0.798825	0.92568	0.85401	0.88731
0.62493	0.98081	0.44218	1.03534	0.88497		0.91809	0.97356	1.08161	0.707923	0.494772	0.748267	0.66452	0.7581	0.57222
0.91461	0.87919	1.10702	0.93976	1.00288		0.78186	1.00674	0.71558	0.731935	0.974303	0.550001	0.90391	0.93883	0.73703
1.13691	0.94585	0.95343	1.11561	0.80293		0.56494	0.90971	1.08362	0.93797	0.942865	0.761902	1.12787	0.72979	0.84601
1.3033	1.06099	0.79174	1.00094	1.10201		0.99313	0.98269	0.62297	0.680149	0.797931	0.617723	0.61703	0.93903	0.63092
0.99653	1.17692	0.93705	0.94345	0.95886		1.16801	0.88211	1.00752	0.843005	1.28134	0.876561	0.95584	0.68477	0.86422
1.15255	1.05068	0.78122	1.18589	0.94626		0.55403	0.91403	0.95309	0.844217	0.858918	0.838926	0.87223	1.04123	0.79433
0.94257	1.05265	1.04411	0.99615	0.97871		1.08755	0.92066	1.12213	0.636815	0.599453	0.94947	0.82462	0.88862	0.91122
0.66087	0.96446	1.08966	1.14604	1.06247		1.31089	1.02887	1.31539	1.08084	1.22963	0.66355	0.74964	0.67355	0.88703
0.95263	0.97379	1.11913	0.8967	1.08011		1.20863	0.95522	0.63653	0.797397	0.571772	0.81938	0.76884	0.80398	0.58624
1.05912	1.05196	1.00642	0.94478	1.14566		0.82438	1.06898	0.79451	0.68643	0.964862	0.554801	0.83616	0.71299	0.70486
1.00123	0.88713	1.20318	0.8063	0.7677		0.71182	0.91928	1.13642	0.903592	0.731251	0.639089	0.8639	0.9036	0.9366
0.97997	0.89078	1.07908	0.77731	1.0513		1.09211	0.97459	1.17111	0.714467	0.77955	0.790171	0.88097	0.86997	0.44433
0.92542	0.86184	1.12638	0.98108	0.84691		1.00946	0.84975	0.99762	0.762824	0.901306	0.539724	0.87592	0.55402	0.87202
1.07642	0.90904	1.03768	0.95865	0.96832		1.04473	1.14849	0.88727	0.652745	0.73802	0.778119	0.94588	0.61656	0.59977
0.76061	1.05464	1.02066	1.13965	0.74523		0.85467	1.03786	1.01438	0.599991	0.711709	0.851813	0.68741	0.76434	0.31963
1.12292	0.73312	1.08442	1.02343	0.86802		1.01544	0.94523	1.096	0.833262	0.515888	0.757196	0.93729	0.83003	0.92172
0.63631	0.9816	0.80249	1.03341	0.6997		1.09573	0.98111	1.98283	0.899105	0.913803	0.783013	0.94164	0.67265	0.84406
0.73016	0.86987	0.94273	1.04175	0.7927		0.80867	0.78311	0.88918	1.10454	0.702666	0.549428	0.65583	0.8248	0.74522
1.07353	0.98008	0.82919	1.1048	1.1452		0.99494	1.02294	1.04866	0.927376	0.927695	0.591835	0.94541	0.68697	0.67036
0.61824	0.99798	1.15482	0.82514	1.08603		1.1082	1.03418	0.95814	0.438371	0.420447	0.685415	0.84424	1.09073	0.60639
1.01926	1.11804	1.07591	0.87046	0.79664		1.02101	1.03029	1.03987	0.728553	0.563839	1.45352	0.84739	0.26608	0.73715
0.90638	1.07107	1.11879	1.15565	0.93774		1.15634	1.0978	0.91884	0.486202	0.721221	0.898116	0.8025	0.81063	0.72802
0.74802	0.91903	0.90741	0.91312	0.87915		1.01064	0.99619	0.81871	1.10153	0.838186	0.742591	0.99107	0.64346	0.86444
0.92336	1.12402	1.00183	0.91389	0.94315		0.95585	0.99719	0.99147	0.824172	0.785133	1.12689	0.73347	0.95709	0.75118
1.0139	1.07015	0.90924	0.87757	1.03554		0.74638	0.77445	1.20997	0.598744	1.0826	0.661801	1.06139	0.87276	0.91927
0.873	0.94339	0.94478	0.79656	0.9157		0.90187	0.94408	0.93054	0.854633	0.817435	0.237186	0.90798	0.83241	0.67911
1.14132	1.08276	1.15413	0.79844	0.84243		0.53425	1.03852	0.94001	0.81702	0.698359	0.948595	0.73933	0.73461	0.78047
1.15204	0.89086	1.01114	0.69121	0.82601		0.91077	0.96046	1.05429	0.722328	0.666773	0.500426	0.90109	0.82379	0.70082
0.99582	0.71574	1.16827	0.94896	0.68547		0.7799	0.97852	0.8738	1.01903	0.583071	0.558403	0.41433	0.44702	0.78551
1.02987	0.63455	0.96088	1.03687	0.84639		1.11092	0.98828	1.23183	0.54255	0.526765	0.487157	0.92714	0.80174	1.02741
0.91923	1.0299	1.26282	0.83068	0.93139		0.91287	0.90201	0.99101	1.12805	0.825439	0.843376	1.14331	0.97292	0.81912
1.00144	1.04145	1.0159	0.90957	0.95685		0.93752	0.96161	0.59017	0.578336	0.809245	0.505894	0.97197	0.90156	0.78819
0.7999	0.77475	0.87718	0.45191	0.9269		1.03293	0.59543	0.99618	0.644444	0.655951	0.520904	0.94915	0.48049	0.85767
0.86414	1.09209	0.98048	1.71292	1.00883		1.02964	0.76337	0.92585	0.632781	0.471496	0.804322	0.88754	0.79406	0.85969
0.8821	0.97972	1.10956	0.84338	1.00336		1.05015	0.92826	0.93988	0.870457	0.586713	1.11219	0.86171	0.82211	0.79559
1.23099	0.95407	1.05646	1.08353	1.01435		0.84943	1.07666	0.97563	0.584563	0.974976	1.87304	2.32267	0.77513	0.41771
0.84227	0.9619	1.03762	1.10809	1.0294		1.07134	1.01495	1.05835	0.47363	0.722618	0.633028	0.6594	0.75889	0.81796
0.85387	1.04703	0.8157	0.91969	0.98632		0.55517	0.84609	0.9133	1.07129	0.66299	0.792563	0.93086	0.83458	0.578
0.92229	1.13664	0.9615	0.77507	0.72378		1.0674	1.05179	0.92225	0.684781	0.340438	0.763457	1.04641	0.6551	0.85914
1.02778	0.99184	1.05477	1.06575	0.93181		0.73498	1.11915	1.08799	0.922609	0.753179	1.00165	0.95491	1.02696	0.40929
0.9088	0.81045	0.91041	0.96989	1.00213		0.82631	0.98743	0.952	0.825374	0.558942	0.525153	0.84502	0.89414	0.97016
0.99678	1.04365	0.87157	0.815	0.97993		0.96524	1.02064	1.11222	0.51967	0.667782	0.665147	1.03371	0.96174	0.79114
1.0104	0.86488	0.96261	1.03562	0.94059		0.98368	3.11164	0.57466	0.983124	0.80168	0.913315	0.68542	0.83337	0.83325
1.04682	1.04288	2.99539	2.56136	0.94867		1.00203	0.98961	1.16665	0.2285	0.597877	0.609548	0.71539	1.00713	0.71548
0.86903	1.04406	1.06428	0.82772	1.17811		1.29616	0.83867	0.90911	0.840559	0.856318	0.698989	0.9447	0.82788	0.89124
1.12778	0.79724	1.00718	1.01448	0.98384		0.75836	1.0406	1.1958	0.459918	0.388817	0.90173	0.85753	0.76152	0.82414
1.05418	0.97394	1.0022	0.93676	1.02041		0.93841	1.07065	1.00857	0.443979	0.87141	0.958886	0.60001	0.53158	0.98067
0.88432	1.02967	0.97085	1.85255	0.94487		0.99687	0.74516	0.84358	0.752379	0.733853	3.0442	0.60671	0.83828	0.40555
0.94357	0.98507	0.84865	0.64873	0.5904		0.80989	0.89918	0.99885	0.900898	0.949348	0.782017	0.88153	0.73091	0.92473
1.1822	1.08097	1.13877	0.97768	0.96402		0.88007	0.59014	0.55387	1.04154	0.774959	0.498673	0.68862	0.85188	0.80109
0.81485	0.94573	1.1211	1.02842	0.91743		0.88432	0.83767	0.97494	0.814697	0.560296	0.56376	0.9598	0.83467	0.90007
0.85922	0.55314	1.22145	0.8456	1.13999		0.97154	1.103	0.67299	0.878957	0.776269	0.760012	0.97488	0.90303	0.62594
1.03981	0.94713	1.32598	1.00667	1.07275		0.63422	0.92076	0.85473	1.17713	0.724855	0.908054	0.83923	0.85532	0.87162
0.66726	1.15606	1.05937	0.70528	1.27423		1.02925	1.02722	0.87945	0.833154	0.290022	0.59706	1.01823	0.29776	0.91278
1.10792	0.95894	0.80583	1.09916	0.93183		0.72823	0.85734	0.96684	0.76516	0.588259	0.416345	0.80131	0.71333	0.88989
0.72022	0.97413	1.13075	1.02998	0.84893		0.77568	1.09521	1.10019	0.838935	0.512396	0.899694	0.67153	0.83496	0.81978
0.5627	1.29193	0.89604	0.91066	0.89457		0.83735	1.09013	1.05911	0.820006	0.62293	0.889855	0.74695	1.06758	0.85431
0.7319	1.10778	1.21551	1.07931	0.69842		1.1126	0.91051	0.83554	0.761637	1.03006	0.714263	0.67402	0.86582	0.85394
1.08081	0.87491	1.19038	1.00315	1.03582		0.72579	1.00913	0.94967	0.636481	0.522835	0.7025	0.88222	0.83728	0.66106
0.91838	1.12984	1.08946	0.96795	0.97457		1.11361	1.17655	1.04641	0.589212	0.688081	1.14577	0.58059	0.62489	0.87351
1.18387	0.99742	0.96697	1.09944	1.08311		0.85747	0.95304	1.09358	1.14988	1.15743	0.872953	0.86326	0.84468	1.07067
1.02616	0.627	0.78701	0.94478	1.16212		0.88441	0.78023	0.84689	0.834047	0.888845	0.794028	0.83127	0.5972	0.4415
1.06504	1.02763	0.92474	0.87725	1.03487		1.04355	0.50997	0.89023	0.796326	0.702075	0.829883	0.90591	0.85594	0.79229
0.80062	0.9731	0.93558	0.88123	1.16487		0.73849	1.04217	1.00758	0.746515	0.701357	0.795969	0.92245	0.88583	0.80045
1.15811	1.15795	0.85167	0.82715	1.0038		1.0976	1.08785	0.99837	0.624494	1.09178	1.38865	1.06266	0.7417	0.95252
1.45503	0.97877	1.05451	1.00138	1.09436		1.33727	1.07532	1.17886	0.825812	0.784795	2.83879	0.72814	0.74542	0.80526
1.21363	1.01587	0.99873	0.96739	1.04266		0.68763	0.70674	0.67415	0.888781	0.368684	0.711107	0.73215	0.79314	0.95831
1.1142	0.5555	1.03902	1.04096	1.19463		0.74918	0.93433	1.35842	0.589962	0.560352	0.607897	0.76992	0.75459	0.71877
0.85044	1.11422	0.97489	0.95801	0.86193		0.97676	1.12793	1.11557	0.693918	0.882064	0.903366	0.73899	0.90012	0.60605
1.12184	1.10316	0.86024	1.29402	0.81727		0.95753	0.89264	0.81447	0.607681	0.786993	0.731253	0.85469	0.80482	0.83678
0.9051	0.99267	1.15306	0.61124	1.17479		0.7304	0.97776	0.80399	0.757284	0.610929	0.922843	0.86357	0.83246	0.74489
0.79781	1.05828	1.08571	1.1112	0.96489		1.27152	0.84948	0.95737	0.444302	0.717783	0.267119	0.99841	0.77534	0.91757
1.07355	0.93731	0.96942	0.84594	0.85842		1.14336	1.06215	0.61547	0.767821	0.64226	0.617177	0.48727	0.85	0.95507
1.13134	1.03029	0.88896	0.92041	1.02655		1.14702	0.9213	0.7981	1.11383	0.880567	0.957323	0.98782	0.69505	0.89651
0.97144	0.83889	1.10335	0.65135	1.07921		0.79635	0.84505	1.07041	0.426576	0.779776	0.605854	0.89056	0.98484	0.94135
0.825	0.99387	1.06562	1.10104	0.93666		1.12641	1.09684	0.94845	0.560876	0.833457	0.631031	0.62191	0.40329	0.84482
0.7864	1.13484	1.16885	0.96736	0.53173		0.94084	0.63721	0.68074	0.627024	0.840137	1.25671	0.72183	0.89952	0.59436
1.07018	0.81344	0.54934	0.86771	0.71576		0.51888	0.85422	0.81334	0.799062	0.790451	0.812956	0.95867	0.74813	0.90776
1.29525	0.7187	1.14051	1.06293	0.87297		0.84083	0.90052	0.47445	0.687271	0.662704	0.649781	0.78658	0.93382	0.74627
1.03151	1.12531	1.07253	0.69731	1.01031		1.00685	1.10806	0.96478	0.905966	1.05497	0.957985	0.69029	0.84037	0.79188
1.0975	0.84183	1.10523	0.92686	0.76497		1.01938	0.83936	1.07198	0.672392	0.607038	0.48433	0.96707	0.65747	0.84158
1.04765	0.77571	1.19594	0.63478	0.88093		1.07145	0.99159	0.94313	1.03682	0.489001	0.706577	0.70725	0.59833	0.76471
0.882	0.86105	0.95579	1.04589	0.77421		1.06724	0.9851	0.97921	0.707609	0.767125	0.978166	0.74834	0.28303	0.65579
0.95153	1.18502	0.83782	0.98265	1.04972		0.88728	0.51418	0.64354	0.683186	0.795683	0.627695	0.95706	0.66892	0.82545
0.94817	1.01921	1.04911	1.17757	1.03573		1.05175	0.99742	0.96919	0.571375	0.807515	0.824996	0.91267	0.97855	0.87336
1.02748	0.7769	0.71109	0.75159	0.86257		1.02892	1.04228	1.06785	0.64565	0.881452	0.923175	0.9281	0.53808	0.88341
1.11703	0.79996	0.87874	1.08733	1.00066		0.88404	1.02249	1.04036	0.672689	0.867856	0.664917	0.94578	0.88605	0.89008
0.83803	0.72451	0.70558	0.91591	0.99227		0.98043	1.26659	0.84647	0.991651	0.855669	0.564602	0.6316	0.94743	0.62094
1.08435	0.96597	0.98517	1.33505	0.44625		0.92306	0.82955	0.85519	0.719211	0.662829	0.855731	0.80028	0.94433	0.92242
0.9775	0.90103	1.13856	0.99632	1.04405		1.03873	1.16431	1.01689	0.773539	1.34919	0.45447	0.92649	0.75867	0.86025
0.99893	0.98578	0.73105	0.92267	1.06825		1.11681	1.04278	0.92036	0.823318	0.64437	0.793356	0.82197	0.80799	0.51396
1.06173	1.17789	0.98582	1.11746	1.09874		1.11051	0.99301	1.05125	0.972536	0.694917	0.801153	0.87083	0.84828	0.96441
1.09949	1.01254	1.03051	0.89684	0.92309		1.11621	0.93533	0.70431	1.02755	0.853152	0.680335	1.06867	0.97321	0.59368
1.03312	1.07108	0.83509	1.10416	0.82272		0.96603	1.102	0.83249	0.816386	0.670902	0.823735	0.6821	1.07702	0.56833
0.88065	0.90744	1.14171	0.87437	0.79688		0.8124	0.90341	0.93445	1.0981	0.572001	1.59214	0.81225	0.63549	0.91507
1.06354	0.94217	1.18811	1.00324	1.06082		0.99066	1.0038	0.86555	0.706365	0.609502	0.829628	0.8427	0.79753	0.86566
1.08834	0.90172	1.34345	0.90068	0.86329		0.85761	1.01281	0.93129	0.477999	0.751582	0.758841	0.84177	0.72901	0.78445
1.10764	0.67712	0.81087	0.68085	0.94512		1.09387	0.79013	0.99833	0.553016	0.688092	0.841688	0.96477	0.93575	0.74809
1.13087	1.07931	1.13521	0.99325	0.69591		0.99833	0.97315	0.98655	0.982302	0.743909	0.921404	0.84741	0.9293	0.96294
1.17085	1.02308	1.02879	0.86562	0.9168		0.92507	1.01059	1.15592	0.558339	0.482164	0.79636	0.78104	0.764	0.6047
0.95164	1.107	1.0659	1.08943	0.84304		1.16809	0.84398	0.91971	0.985346	0.769043	0.6538	0.76682	0.38349	0.77478
0.6641	0.9178	0.73224	0.9053	0.75892		0.97466	0.89747	0.83757	2.62801	0.784745	0.611795	0.81473	0.59491	0.77661
1.10166	2.10228	1.10518	1.01334	0.96273		0.84151	1.14845	0.90099	0.486069	0.852846	0.719823	0.8464	0.66192	0.82357
1.04908	0.94632	0.98629	0.77428	1.04008		1.01689	0.62216	1.00361	0.851378	0.480334	0.59346	0.99793	0.87946	0.84612
0.99886	1.11955	0.87989	0.7435	0.8972		0.97022	0.89586	0.97486	0.516251	0.693582	0.791161	0.71717	0.77912	0.81132
0.95917	1.09924	0.82799	0.95816	1.08398		0.87161	1.01714	0.92203	0.859496	0.563969	0.951399	0.85283	0.81142	0.82957
0.75085	0.28134	1.0071	0.98039	1.0277		0.6284	0.9329	1.00425	0.583692	0.633475	0.90931	0.94563	0.96907	0.80567
0.88623	1.16644	1.09768	0.95515	1.09628		1.02007	1.22676	1.11935	1.26698	0.992681	0.771802	0.70625	0.77752	0.85037
1.14583	0.96601	1.06802	1.01244	1.08297		0.91053	0.90064	0.87844	0.649315	0.342431	0.54397	0.53285	0.86066	0.89378
0.91531	0.85785	1.18617	0.98363	0.93246		0.98498	1.04087	0.96899	0.476574	0.510223	0.789511	0.80529	0.7887	1.04037
0.65881	0.95964	0.37789	0.66526	0.92728		0.98879	0.86728	0.9449	0.784022	0.808286	0.941262	0.4958	0.80296	0.8727
0.88014	0.75656	1.19493	0.99324	0.91925		1.07347	1.05531	0.94073	0.578542	0.749534	0.702673	0.81261	0.99093	0.70965
0.94227	0.90228	1.04846	0.74996	0.92364		0.65293	0.78054	0.84308	0.783016	0.721241	0.871617	0.88311	1.04401	0.79316
1.23399	0.91323	1.1262	1.07976	1.23504		0.91193	0.97713	0.8045	0.841145	0.685225	0.775248	0.74321	0.70509	0.91834
1.2935	0.85482	1.0923	1.12918	1.07989		0.91479	1.07458	1.04323	0.761522	0.570291	0.487012	0.63357	0.92604	0.92682
0.93476	0.88823	0.98291	1.10663	1.11987		0.98693	1.05602	0.7063	1.1438	0.66964	0.901137	0.81007	0.88792	0.84904
0.89573	1.1658	0.76703	1.03205	0.61857		1.13159	0.95093	1.01108	1.06498	0.773909	1.12273	0.56082	0.85693	0.70583
1.00057	1.11819	1.09254	0.99158	0.50604		0.94091	1.07736	0.4574	0.438608	0.732634	0.789681	0.77636	0.82461	0.7727
0.90577	0.61602	0.99097	1.00361	1.2336		1.2553	0.70307	0.42242	0.469968	0.582553	0.713277	0.84018	0.80712	0.71229
0.95878	1.05875	1.08024	0.63306	1.00431		0.98578	0.95822	0.99903	0.466186	0.520424	0.801026	0.76576	0.84803	0.79702
1.28587	0.74185	0.92141	1.08936	0.96662		0.99136	0.71543	1.0737	0.669055	0.655256	0.931013	0.94227	0.58368	0.89459
0.77714	0.98479	0.87412	0.8636	0.97933		0.96624	1.03443	0.72744	0.558411	0.469694	0.681221	0.7491	0.858	0.69779
1.06541	0.85107	1.00512	1.16675	1.01334		1.05344	0.842	0.9642	0.703401	0.818566	0.826704	0.73129	0.98512	0.78394
1.01904	0.77887	0.9417	1.03854	0.92107		0.98741	0.86685	1.00125	0.515481	0.556178	0.988025	0.71607	0.86853	0.8406
1.06658	0.92297	0.76557	1.0365	0.89021		0.79336	0.96488	1.00243	0.77755	0.450669	0.656154	0.82351	0.67291	0.86719
0.63555	1.16476	0.98114	0.99668	0.88021		1.05531	1.07377	1.00378	0.714032	0.837402	0.342821	0.78963	0.65269	0.54504
1.05136	0.81683	1.04191	0.46264	0.62629		1.03282	1.17619	0.89764	0.800343	1.48404	1.06161	0.88672	1.05374	0.72623
0.95007	0.94949	0.84242	0.96241	0.91848		0.91993	1.22734	0.74092	0.6983	0.682487	0.6354	0.93903	0.75473	0.97971
1.34783	1.02878	0.73409	1.0064	0.93687		0.96485	0.92477	0.96673	0.839948	0.880658	0.327168	0.7852	0.7421	0.81602
0.90733	1.0255	1.00193	1.03148	0.83399		0.77019	0.92674	0.85573	0.748319	0.734317	0.770387	0.91375	0.83502	0.80366
0.94505	0.93712	0.79375	0.95981	0.82687		0.94508	1.24303	1.08133	0.849731	0.574487	0.514921	0.33606	0.86745	0.8909
1.30997	0.7305	1.14804	0.62612	1.02926		1.03956	0.90833	0.88075	0.534833	0.5279	0.814573	0.78301	0.71974	1.14087
0.94647	1.09302	0.99097	0.85491	0.86254		1.16865	0.94373	0.49678	0.805644	0.761793	0.981719	0.84112	0.79943	1.10691
1.06331	0.9165	0.59159	1.04255	0.98383		0.92878	2.42106	0.85902	0.87248	0.946769	0.318988	0.5522	0.78623	0.68089
1.12579	1.14283	1.10152	0.70719	0.87306		0.78483	1.20111	0.64445	0.693113	0.311288	0.886781	0.88999	0.29421	0.74747
1.05672	1.12252	1.01911	0.77487	0.98739		0.75743	0.95588	0.82796	1.12012	0.651001	1.05351	0.81766	0.8073	0.7904
1.03987	1.0999	0.89105	1.38956	1.09082		0.8806	1.34885	1.08364	0.698067	1.58651	0.753215	0.94477	0.73858	0.82904
1.36659	0.89838	0.9921	1.02822	1.15508		0.80076	1.09189	0.70353	0.280948	0.650209	0.318327	0.85701	0.91297	0.82769
1.06227	1.07632	0.73747	0.95962	1.03863		0.85731	0.84889	1.03779	0.427363	0.958152	0.636203	0.89065	0.88928	0.7799
0.85295	0.6629	1.1232	0.55706	0.78727		0.84631	0.68248	0.80133	0.683922	0.849555	0.705865	0.88145	0.73415	0.76973
1.02151	1.07939	0.44789	0.74382	1.00769		1.89258	1.03111	1.1054	0.836581	0.749661	1.00427	0.78046	0.816	0.90367
0.9633	1.11754	0.96399	0.83463	1.43225		1.11227	0.72351	1.02206	0.855936	0.773146	4.59843	0.74583	0.84785	0.54564
0.98586	1.01533	1.20219	0.89348	0.91778		0.83185	0.99351	0.96909	0.689705	0.74315	0.865584	0.96854	0.81368	0.92132
1.011	0.78366	0.57126	0.74338	0.7875		1.08904	1.06554	1.09319	0.907486	0.565528	0.8709	0.32201	0.8092	0.59251
1.05066	0.92067	0.80775	0.9809	1.1209		0.93073	1.03359	1.05815	0.642738	0.987729	0.779214	0.76219	0.72609	0.93331
0.90678	0.90399	1.15269	0.9764	0.93792		0.87943	1.08024	0.96815	0.714334	0.456957	0.704623	1.00512	0.68016	0.84498
1.08677	0.98202	1.13736	0.84158	1.09974		0.95682	0.54491	1.11569	0.842835	0.814462	0.965438	0.73297	0.88806	0.77658
0.96602	0.98343	1.02064	1.07557	0.87549		0.90332	1.13731	0.97474	0.871948	0.823924	0.515578	0.81874	0.58623	0.68717
0.65207	0.9146	0.86021	0.75593	1.04806		0.91035	0.99008	1.2098	0.58317	0.727576	1.39602	0.84276	0.47825	0.75067
1.01797	0.83128	0.89189	0.37194	0.67292		1.11003	0.99466	0.59475	1.68039	0.657994	0.756679	0.79842	0.78986	0.67978
0.84829	1.0434	1.18297	0.79391	0.9392		0.96568	0.46223	0.96493	1.21397	1.07623	0.865736	0.80111	0.65123	0.64392
1.07563	0.99977	0.99883	0.85699	1.02143		1.42123	0.76283	0.72083	1.15239	0.836269	0.827332	0.79686	1.00944	0.36987
0.83253	1.10838	1.09799	0.66679	1.60306		0.93329	0.78763	0.6617	0.386918	0.782267	0.730213	0.66947	0.93822	0.90215
0.91947	0.62328	1.08671	0.95946	0.9012		0.81463	1.07404	0.93561	0.887504	0.652666	0.835225	0.88561	0.6528	0.66425
1.07341	0.95069	0.92599	2.03473	0.88158		1.06257	0.73707	1.0385	0.98543	0.340432	0.898572	0.77415	0.79947	0.80467
0.81273	0.81809	0.95914	0.88184	0.94916		0.98291	0.89855	0.73946	0.713998	0.884731	0.304899	0.68022	1.03696	0.79083
0.44795	1.06573	0.95364	0.80074	0.94283		0.43305	1.27377	1.06859	0.748458	0.722174	0.822854	0.95101	0.92659	0.68751
1.04698	0.90072	1.50024	0.99544	1.1453		0.7916	0.93934	0.99794	0.308303	0.894546	0.790652	0.83053	0.63628	0.8727
0.7835	1.04846	0.88008	0.83467	1.30187		1.07094	0.98241	0.79622	0.780216	0.763245	1.16903	0.84046	0.96144	0.82658
0.97928	1.10341	0.89676	0.94178	0.86316		1.09389	0.97664	1.06803	0.682245	0.849772	0.758736	0.9468	0.71316	0.8689
1.26427	1.0729	0.99029	1.01084	0.75323		0.78445	1.06923	1.50647	0.46568	0.803259	0.849434	0.64625	0.92149	0.47111
1.09565	1.1183	1.13293	1.01401	1.00264		0.92276	0.81149	1.04725	0.854452	0.83111	0.903272	0.88899	0.97324	0.85707
1.03234	1.06159	1.00346	1.02217	1.11749		4.42365	0.86234	1.07364	0.636266	0.9537	0.906664	0.99653	0.84318	1.03111
1.00199	1.06661	1.12158	0.81521	1.04555		0.71697	0.79766	0.96911	0.432329	0.283833	0.451463	0.70519	0.78183	0.633
0.93042	0.66059	0.68836	0.60229	0.97011		0.90916	0.52178	1.17197	0.563258	0.523215	0.795095	0.66591	0.36682	0.77557
0.95475	1.10087	1.04394	0.85814	1.08566		0.87233	1.11804	0.88849	0.637492	0.819739	0.762869	0.51191	0.88982	0.87347
0.97454	1.07852	0.89364	0.86144	0.68917		0.99248	0.90047	1.03804	0.979081	0.771158	0.827171	0.67325	0.84572	0.75562
0.80536	1.02063	1.11146	1.10991	1.01373		1.24586	0.99173	0.96783	0.519471	0.761518	0.844277	0.86449	0.67259	0.88821
1.18514	0.98152	0.63538	0.91006	0.93563		1.11814	1.29644	0.65174	1.31245	0.504742	0.8286	1.07233	0.91271	0.45354
0.99833	1.11687	1.06263	0.82996	0.90516		0.6601	0.91612	1.13327	0.780754	0.89064	0.513192	1.02071	0.88637	1.11076
0.90792	1.23866	0.87552	1.0355	0.86163		0.82923	1.10943	0.90743	0.707428	0.856905	0.600391	0.6675	0.8734	0.59552
1.10184	1.12276	0.83949	0.88918	1.03959		0.91896	0.9749	0.88323	0.562502	0.722869	0.677673	0.75676	0.82849	0.75501
1.20107	1.06923	1.08102	1.08942	0.72842		0.64706	1.09305	0.93546	0.94212	0.586526	0.940577	0.77561	0.76449	0.58943
0.98319	0.88325	0.97336	1.00376	1.08834		0.94385	0.75037	1.02923	0.623499	0.682422	0.702776	0.89194	0.94856	0.82716
0.93418	1.0812	1.01845	1.2067	0.73208		0.81998	1.16227	2.01744	0.621285	0.727658	0.718918	1.1674	0.89876	0.74017
1.08287	1.16749	1.21518	1.08757	1.03817		0.93535	1.08667	1.02815	1.01016	0.535249	0.954901	0.89206	0.73864	1.05761
1.00949	0.99001	0.8327	0.94152	1.02057		0.88146	1.01391	0.77048	0.985312	0.981111	0.656353	1.22285	0.81001	0.84009
0.88421	0.92307	1.05654	0.9689	0.8546		0.99504	0.7865	1.23371	0.960916	0.496457	1.28008	0.89798	0.82482	0.6086
1.08782	1.04961	0.87829	0.935	0.97257		0.92229	0.90792	0.84501	0.841917	0.883589	0.978354	0.75008	0.69088	0.87406
1.25142	0.95048	0.59104	0.72767	0.98894		0.89104	0.92337	0.92988	0.70776	1.57948	0.778913	0.84676	0.58655	0.69388
1.12124	0.72817	0.89747	0.98628	0.9735		0.91629	1.08347	0.60476	0.479423	0.736357	0.808884	0.75158	0.91936	0.82112
0.99487	0.91886	1.61284	0.99172	1.03835		1.05763	1.0834	0.81396	0.984346	0.99359	0.851164	0.81691	0.56479	0.68712
0.86486	1.0292	0.97089	0.94078	0.88332		0.68091	1.00324	1.00053	0.476285	0.856582	0.640255	1.00324	0.891	0.86528
0.94725	0.97469	1.01446	1.00636	0.50042		0.80313	0.89525	0.94352	1.06091	0.562004	1.09725	0.89568	0.8334	0.95224
1.03202	0.87586	1.1339	0.83745	0.8875		0.94991	0.98077	0.96634	0.59113	0.890956	0.971477	0.87348	0.79714	0.63153
0.5373	0.98453	0.93179	0.78941	0.93318		1.18397	1.20131	1.03607	0.92787	1.0112	0.730565	1.04614	0.65495	0.61564
0.85577	1.12287	0.88937	1.40307	0.80869		0.92572	0.99849	1.04513	0.570048	0.797484	0.894816	0.653	0.58435	0.59577
0.97285	1.05603	0.98387	1.0978	1.04594		0.90094	1.08073	0.96209	0.661448	0.81563	0.840365	0.8627	0.94543	1.2332
1.07029	1.08072	0.6905	0.91909	0.81886		0.92372	0.88973	0.8769	0.829509	0.823651	0.598568	0.71751	0.79332	0.98393
0.9888	0.92941	1.01586	1.00414	1.24562		0.8539	1.11763	0.73881	0.757646	0.378075	0.225545	0.79703	0.82519	0.7391
1.02033	0.98815	0.98729	1.21536	0.96262		0.76232	0.40342	0.62823	1.41816	0.634872	1.00124	0.93304	0.84857	0.75998
0.95412	1.05457	1.18078	0.94759	0.91508		0.95401	1.29004	1.02851	0.808558	0.640618	0.846211	0.84119	0.61054	0.86105
1.01729	1.99906	1.06229	1.07256	0.8055		1.09889	0.81614	0.9899	0.893257	0.887731	0.526379	0.90969	0.67177	0.86353
1.08097	0.86528	1.08971	0.88676	0.96021		0.72386	1.02837	0.9555	1.07559	0.967877	0.508379	0.70576	0.94171	0.68247
1.13861	1.14726	1.13441	0.93651	1.0831		0.62752	1.017	0.77419	0.667457	0.799103	1.83894	0.96049	0.96388	0.60515
0.78252	0.98382	0.96375	1.10099	0.96812		1.04204	1.09991	0.8883	0.715235	0.615734	0.497812	0.75018	0.95298	0.84202
0.85082	0.98262	0.99676	1.08963	0.90703		0.92566	1.13916	0.9758	1.04636	0.902185	1.55735	0.69384	0.66392	0.77268
0.99187	1.01958	1.09211	0.85809	0.62456		0.81884	0.77454	1.08416	0.647282	0.472358	0.55548	0.87427	0.80883	0.56453
1.01553	0.93898	1.08058	0.91185	0.85769		1.12143	0.97694	1.04006	0.532622	0.704953	0.901931	0.57517	0.77253	0.56629
1.04033	0.98446	1.13479	0.66863	0.48988		0.9886	0.96979	0.9926	1.2484	0.551735	0.693629	0.80826	0.81977	0.73199
1.0414	0.69717	1.0796	0.92488	0.73115		0.95716	0.85219	1.0717	0.823475	0.62714	0.771233	0.79924	0.92086	0.83776
0.9408	0.92958	1.08039	0.87652	0.93824		1.09282	0.98283	1.09312	0.869532	0.343355	0.796715	0.94689	0.84389	0.75495
0.88273	0.75932	1.05466	0.78011	0.96935		0.74513	0.86741	1.07437	0.85379	0.959237	0.529474	0.86896	0.83432	0.91957
0.92213	0.96298	1.28012	0.89203	1.10459		0.82079	0.99294	0.91862	0.785713	0.823227	0.878297	0.68599	0.83314	0.88946
1.01405	0.80051	1.03675	0.76784	1.02102		1.09159	1.18565	0.74371	0.591913	0.652091	0.867446	0.91688	0.79454	0.93535
0.78723	0.9899	0.89101	0.90569	0.941		1.06586	0.96379	0.96245	0.647381	0.877838	0.78399	0.94715	0.82081	0.80796
0.57249	0.79483	0.95824	0.9228	0.92336		1.00842	0.87695	0.85956	0.181636	0.479615	0.890495	0.98676	0.86698	0.783
0.91925	0.83568	0.96323	0.59165	1.2499		0.64923	0.92161	0.97965	0.492625	0.605388	0.605324	0.91375	0.46595	0.78749
0.80328	1.13442	1.11188	0.96911	0.90147		0.6588	3.23378	1.09821	0.446915	0.787074	0.51793	0.81402	0.90802	0.67593
0.85713	1.06394	0.95423	1.21412	1.0243		0.97906	0.96489	1.11917	0.515851	0.674827	0.765818	0.892	0.77084	0.60701
0.95268	0.93204	1.03458	0.86333	0.88577		0.9518	1.16539	0.94841	0.839529	0.779277	1.40518	0.96816	0.82032	0.68816
1.0138	1.10694	0.74748	1.05866	1.04242		0.82447	0.82535	0.93652	0.5838	0.962297	0.617727	0.9137	0.77764	0.79146
1.14853	1.11158	1.10162	0.64961	1.39093		0.98972	1.0594	1.19408	0.756118	0.678507	0.818058	1.02456	0.89455	0.93921
1.13707	0.9869	1.04491	0.93017	0.89593		1.03064	1.00991	1.12447	0.778367	0.581922	0.949056	1.05082	0.72413	0.83848
1.10061	0.99233	0.81418	0.90997	0.9051		0.89689	0.98716	0.97116	0.675015	0.948668	0.851327	0.86176	0.88369	0.76915
1.01027	0.86039	0.95505	1.05808	1.09106		1.05215	1.2602	1.02884	0.754204	0.362068	0.681875	0.68951	0.69316	0.81116
1.18217	1.09766	0.77991	0.66195	0.6876		0.92529	0.96286	0.52208	0.869797	0.742041	0.973543	0.70172	0.89411	0.7735
0.68632	1.11777	1.24863	0.80125	0.89706		0.99856	1.42942	0.76048	0.856834	0.624196	0.953777	0.77	0.85286	0.85174
1.10768	1.12475	0.90875	1.3368	1.06818		1.09509	0.56748	0.98938	0.601018	0.754517	0.522885	0.86006	0.67625	0.80914
1.03703	0.79558	0.89481	0.99335	0.5743		1.11226	1.01906	1.01608	0.898506	0.743084	0.75958	0.96725	0.66005	0.77047
0.9827	1.11563	0.78845	0.90688	1.08648		0.89178	0.89624	0.98053	0.590475	0.579385	0.944524	0.89967	0.93697	0.7432
1.02207	1.13226	1.18324	0.94189	0.94041		0.85936	0.9781	0.5214	0.761755	0.507761	0.416938	0.76684	0.84701	0.88628
1.07715	1.15573	0.91373	1.06496	1.13675		0.74623	0.72944	0.8209	0.861831	0.667103	1.00389	0.48759	0.89393	0.89284
1.07345	0.92311	0.82271	0.89717	1.04851		0.68768	0.81308	1.11756	0.617533	0.599526	0.794133	0.7266	0.66703	0.82208
0.85075	1.20872	0.67515	0.98845	0.75473		0.8374	1.11478	0.95073	0.756865	0.731641	0.623378	0.86891	0.66074	0.92636
1.07849	1.07962	1.00684	0.88848	1.04823		0.94281	0.8783	1.01478	0.612426	0.670067	0.813687	0.61504	0.81714	0.76167
1.113	0.65449	1.16638	1.04455	1.08317		0.79063	1.10637	0.97469	0.666206	0.518514	1.00521	1.00758	0.44318	0.71537
1.03425	0.71554	0.66722	0.9757	1.16867		1.07354	1.03862	0.96159	0.625853	0.722146	0.691068	0.93139	0.59253	0.86771
0.9733	1.06901	0.68559	0.96942	0.87644		0.94387	0.92778	0.95125	0.862615	0.406363	0.687939	1.0532	0.81887	0.87499
0.87229	1.00601	1.00737	0.99006	1.00836		0.90199	1.31809	0.94408	0.57368	0.714037	1.24513	0.75881	0.66385	0.79765
1.01076	0.74445	1.09801	0.90717	1.01963		0.93987	1.01499	0.90405	0.720966	0.70681	0.750306	0.80017	0.8314	0.49551
0.65161	1	1.11002	2.39911	0.85909		0.9033	0.60743	0.9474	0.375569	0.67555	0.813221	0.65375	0.94323	0.73408
1.0426	0.87368	0.85396	0.7301	0.78788		0.6401	0.85142	0.89252	0.845379	0.783824	0.581945	0.79508	0.82868	0.69467
0.88888	0.97907	0.97538	0.87447	1.01886		0.99921	0.61326	0.66637	0.563185	0.520205	1.20768	0.58561	0.80921	0.45413
0.96382	0.89317	0.94431	0.90616	0.93589		0.97917	0.9005	1.12153	0.983914	0.756801	1.07649	0.61635	0.57007	0.83117
0.73358	0.82916	1.08894	0.653	0.83883		0.86675	1.12785	1.00853	0.865668	0.629978	1.00873	0.9643	0.87096	0.61593
0.87088	1.07003	0.95038	0.92123	0.70156		1.12008	0.38847	0.93585	0.826504	0.946548	0.858043	0.82049	0.84414	0.67468
1.21828	1.17019	0.95433	0.79988	0.65644		0.95009	1.01975	0.83555	0.858844	0.859568	0.83961	0.48553	0.76588	1.04065
1.00682	1.10788	1.18665	0.81058	0.94949		1.03399	1.07345	1.08752	0.727337	0.676505	0.583503	0.75221	0.79501	0.71848
1.05735	0.9689	0.71175	0.77073	1.19919		1.10192	1.0793	0.86723	0.843599	0.708238	0.372526	0.8827	0.87035	0.61285
0.93495	1.13074	0.90715	1.00244	0.92058		1.07159	0.92911	0.81209	0.873856	0.749746	1.23132	0.72512	1.12523	0.71823
1.0531	0.81273	1.0036	1.11311	0.6245		0.97965	0.71019	1.03611	0.716729	0.74104	0.604827	0.8762	0.86444	0.76267
0.6942	0.8132	0.22395	1.01816	0.73352		1.10686	1.43052	0.96039	0.465577	0.434786	1.38603	0.95796	0.83043	0.82496
0.98535	1.00108	1.22379	1.12272	0.92818		0.71908	0.7875	1.0673	0.913325	0.561054	0.757068	0.93514	0.75067	0.80321
1.01093	1.02709	1.03931	0.86815	0.93719		1.18316	1.04086	0.77182	0.588325	0.725849	0.751796	0.89007	1.01486	0.89267
0.92051	0.92845	0.9744	0.95717	0.90022		0.97425	0.724	1.15635	0.905247	0.846261	0.384448	0.9551	0.92429	0.94951
0.99588	0.99371	1.12022	0.97038	1.01849		0.6301	1.08058	0.94668	0.837438	0.741772	0.88186	0.84424	0.87997	0.67147
0.96709	0.94752	1.05094	0.89932	0.76757		1.11264	0.94774	0.90769	0.64135	0.546764	0.846655	0.39156	0.9231	0.47442
1.00901	0.93952	0.87758	0.94103	0.91436		0.75486	0.80617	0.43905	0.668369	0.839985	0.858369	0.9511	0.94551	0.87733
1.00028	1.03338	1.12896	0.69074	0.61044		0.99062	0.94221	0.95346	0.267091	0.853035	0.667021	0.91942	0.54774	0.69785
0.92851	1.0311	0.6307	0.91954	0.89478		0.74268	0.90262	0.84625	0.236079	0.679942	0.597367	0.93966	0.3749	0.69891
0.65368	0.95183	0.91229	0.89292	0.97168		1.09315	0.95114	1.2044	0.69116	1.06157	0.909079	0.66214	0.90332	0.97539
1.09535	0.79501	1.03108	1.0301	1.2204		0.94202	0.99186	0.99747	0.597155	0.846628	0.644573	0.85461	0.8649	0.75143
1.28544	1.28518	0.81124	1.06267	0.81674		1.13218	1.11016	0.82087	0.779722	0.793736	0.87486	0.88414	0.56519	0.69278
0.83305	1.0826	0.96139	1.16816	0.92544		0.80721	1.00414	0.90555	0.761204	1.06186	0.748103	0.86986	0.6337	0.87111
1.10069	0.98213	1.21261	0.85867	0.98931		0.94559	0.89157	0.65876	0.822255	0.610701	0.81838	0.84977	0.89874	0.86662
0.9124	0.97524	1.0095	1.04261	0.85598		0.69356	0.75555	0.84381	0.54853	0.958877	0.620051	1.02683	1.05519	0.96851
0.91226	0.90441	0.8667	0.91048	1.15497		0.92767	0.94045	0.92609	0.702353	0.645617	0.657529	0.89647	0.97176	0.57462
1.0607	0.56039	0.69364	0.9956	1.07748		1.04973	0.95179	0.90963	0.793787	0.727884	0.932821	1.01947	0.7701	0.65777
0.8497	1.03904	1.07294	0.56336	0.83448		0.85797	0.71892	1.10933	0.705776	0.810052	0.934125	0.82951	0.64886	0.61748
1.07278	1.01095	1.20044	1.08496	0.95787		1.0871	0.88383	1.07152	0.853516	0.849258	0.68435	0.79739	0.80351	0.78277
0.87039	0.89866	0.74515	0.9551	0.94267		0.97278	0.70003	0.84215	0.650991	0.767234	0.88227	0.99789	0.89848	0.83267
1.22287	0.90463	0.78727	0.90223	0.42198		0.8311	0.13925	1.04509	0.725581	0.728991	0.769586	0.93176	0.90456	0.9971
0.87731	0.99347	0.86993	0.90841	0.94979		0.54353	0.68898	0.97134	0.533019	0.147696	0.752301	0.87573	0.80936	0.72816
1.10291	1.09727	0.77791	0.8364	1.24317		0.84488	1.01963	0.85785	0.561376	0.296197	0.904368	0.68772	0.76832	0.57575
1.04945	1.11723	1.07047	0.44346	1.06489		0.71303	0.8984	1.15741	0.731923	0.48489	0.778569	0.73001	0.98324	0.54676
1.04111	1.17146	0.97178	0.99248	0.93836		0.91672	1.15332	0.86423	0.500807	0.725007	0.816305	0.81486	0.95425	0.64483
0.57138	0.78076	1.03504	0.84858	0.71089		0.98362	1.07434	1.0366	0.579751	0.717243	0.433294	0.59101	0.81712	0.88509
1.24068	0.96501	1.16896	0.99838	0.98088		0.80854	0.95974	0.83089	1.00657	0.629791	0.83557	0.7736	0.65732	0.86404
0.98517	1.02627	1.15058	0.96637	1.02812		1.06889	1.07002	0.82591	1.02719	0.525532	0.551868	0.66406	0.74074	0.57819
1.03051	1.10858	0.91065	0.92595	0.94324		1.11997	0.84042	1.01136	0.790743	0.721069	0.827051	0.74602	1.03594	0.82338
0.86031	0.87079	1.04389	1.02468	0.88352		1.1128	0.93828	1.00346	1.33853	0.591948	0.781941	0.83837	0.88475	0.58914
1.05983	0.74689	1.07049	0.90533	0.93685		1.08004	0.99179	1.01423	0.778042	1.78832	0.704973	0.85633	0.79007	0.82401
1.08136	0.9438	1.01899	0.9761	0.47076		0.87549	0.9851	0.96024	0.264314	0.619042	0.906515	0.8537	0.83116	0.74298
3.4674	1.253	0.8173	1.13811	1.08517		0.8101	0.73873	0.71132	0.863146	0.601859	0.627611	1.01509	0.76757	0.76483
0.97098	1.13534	0.95665	0.7969	0.99032		0.93437	1.06957	1.10275	0.713448	0.663277	0.505962	0.92589	0.39093	0.84284
0.96274	1.00845	0.89589	1.11409	1.01688		0.68087	1.06416	0.75559	0.687216	0.843029	0.721672	0.6329	1.03975	0.73491
1.28876	1.05786	1.03811	0.78122	0.86903		1.03559	0.91	0.75458	0.857292	0.907666	0.753291	0.80613	0.82094	0.69847
0.93215	1.02157	0.91797	0.93053	1.07375		0.55526	0.9425	0.81577	0.729258	0.628593	0.458636	0.82943	0.82368	0.94522
1.13178	0.95548	1.0871	4.25832	0.71353		0.74659	0.70025	0.79554	0.617219	0.642128	0.757944	0.7423	0.59039	0.82558
1.19766	1.03179	1.00576	0.88517	1.05309		0.86985	0.82276	0.58638	0.622496	0.685886	0.553033	0.74055	0.44777	0.57536
1.10272	0.95792	0.81245	1.04999	1.00441		1.21876	0.81646	1.18054	0.838449	0.716569	0.892916	0.79305	0.74391	0.64364
1.10237	1.03518	1.2974	1.54579	1.20345		0.73054	0.96441	0.78701	0.59213	0.3554	0.43136	1.03223	0.7454	0.91516
0.85066	1.14444	0.92115	0.98745	0.83599		1.18144	0.9342	0.99652	0.475986	0.845156	0.766682	0.86181	0.88697	0.8383
1.16121	0.84403	0.8972	0.89058	0.83314		0.96006	0.87547	1.04649	0.823027	0.754129	0.753493	0.82035	0.6307	0.87406
1.13663	0.6998	1.05921	1.02956	0.63383		1.01622	0.60682	1.02137	0.73575	0.650116	1.26855	1.01567	0.79331	0.85446
1.0724	0.98134	0.29674	0.82591	0.36836		1.0991	0.62504	1.15165	1.13771	0.599705	0.763507	0.94184	0.48658	0.67063
1.09958	1.14991	0.75496	1.06305	0.86592		1.05155	0.90552	0.78897	0.604749	0.442873	0.778985	0.86773	0.57913	0.86867
0.99736	1.16327	1.01856	0.87313	0.9008		0.9426	1.03585	0.7516	1.41268	0.605834	0.74554	0.78833	0.73579	0.64436
0.94268	1.06825	0.95898	1.05803	0.91644		0.83689	1.11648	0.66465	1.10724	0.575963	0.456794	0.87678	0.61641	0.71844
1.03501	1.01627	0.39657	0.98943	0.90029		0.80212	0.6243	0.8183	0.94954	0.717372	0.670149	0.73506	0.73063	0.857
1.27902	0.53394	1.29148	1.05898	0.64068		1.09904	0.88954	0.78795	0.693871	0.523667	0.626705	0.77774	0.83167	0.64785
0.9772	0.82307	1.02097	1.31625	0.87923		0.69427	1.48346	0.98718	0.895384	1.00586	1.07322	0.93287	0.77115	0.65748
0.9837	1.00737	0.69929	0.98275	0.70598		0.88391	0.8529	0.86314	0.672511	0.497699	0.498199	0.84004	0.70361	0.81065
0.80814	0.86081	0.46359	1.1258	0.90669		1.07481	1.05126	0.803	0.954802	0.660019	0.727996	0.78604	0.71207	0.59233
0.9282	0.80814	0.83897	1.05171	1.03085		0.64277	1.0266	1.08499	0.622865	1.01958	0.564987	0.80292	0.79542	0.8003
1.07578	1.08119	0.8104	0.86892	0.92911		1.18005	0.84703	0.92383	0.941026	0.671136	0.735543	0.46575	0.76051	0.93151
1.0824	1.02506	0.83881	1.0179	1.00526		0.61572	0.83924	0.75321	0.446662	0.828915	0.621465	1.09983	0.91438	0.85703
1.01799	0.65139	1.03168	1.08956	0.75366		0.66285	0.8087	0.92021	0.831822	0.780979	1.19253	0.68029	0.883	0.84867
1.23795	1.12822	0.97554	1.01245	0.83745		0.94681	0.96713	1.11853	0.87953	0.877782	0.497431	0.85435	0.8028	0.77625
0.69341	1.06343	0.81132	0.94359	0.98407		0.88234	0.72737	0.90378	0.536957	0.558904	0.484767	0.78746	0.67916	0.47284
0.14013	0.72183	1.08817	1.048	1.05806		1.03993	1.02229	0.63716	0.751385	0.466566	0.605629	0.63531	0.78378	0.88793
0.69106	1.05448	1.07876	1.04591	0.84229		0.79822	1.08145	0.93741	0.706487	0.365118	0.504055	0.5491	0.771	0.94139
0.86993	1.2142	0.94639	0.62693	0.98372		0.85684	1.04689	1.15902	0.614474	0.777322	0.734833	0.81287	0.85143	0.88221
1.15802	0.95896	1.02299	0.81848	0.99338		1.09041	0.88965	1.14827	0.909321	0.546822	0.970123	0.59837	0.68712	0.91377
0.98502	1.0647	0.84363	0.73584	0.7775		0.98091	0.80673	1.0598	0.728898	0.831552	0.639979	0.48728	0.96965	0.82848
0.93994	1.22413	1.05673	0.78836	1.05616		1.42992	1.02481	0.91426	0.79139	0.815851	0.712823	0.82318	0.82937	0.75639
0.71023	0.93908	0.8376	0.96673	0.92786		0.89751	1.10764	0.89648	1.0678	0.908593	0.785715	0.62877	0.89034	0.76441
1.21868	0.5367	1.20699	0.96391	0.94747		0.90618	1.02551	0.88939	0.764027	0.765187	0.84274	0.87924	1.34292	0.83174
0.83045	0.58805	1.00429	3.55521	1.36479		0.89892	0.75975	1.04734	0.323279	1.21365	0.851208	0.78028	0.81534	0.76954
0.61405	0.85714	0.7941	0.98259	0.86961		0.97913	0.91904	0.96959	0.678007	0.400343	0.963322	1.04218	0.69837	0.80576
0.90675	1.07786	1.05045	0.71157	1.06164		0.87839	1.02338	0.94379	0.613611	0.527381	0.901705	0.92918	0.75248	0.50812
0.52491	1.0514	0.93463	0.96157	0.94816		0.91653	0.95096	0.94513	0.720377	0.820151	0.839577	0.70947	0.76608	0.77482
0.77079	1.23603	0.73746	0.99157	0.69964		0.9856	0.90854	0.86499	0.365773	0.74098	0.422664	0.78108	0.71606	0.72466
1.08096	1.15099	0.7119	0.86707	0.8397		0.77632	0.93168	1.03797	0.708227	0.635124	0.395507	0.91336	0.84606	0.9248
1.11601	0.77506	1.19756	0.92827	0.96064		0.97916	1.07603	1.09023	0.443605	0.951237	0.756337	0.74171	0.93783	0.76467
1.04724	0.83746	1.1591	0.68957	0.66359		0.71211	1.09451	1.0813	0.933023	0.83362	0.402428	0.88906	0.91215	0.67943
1.02434	1.21988	1.08883	1.07471	1.05781		0.83396	0.75855	1.01752	0.751567	0.771869	0.54056	0.97725	0.85603	0.71478
0.82212	1.19988	1.23968	0.84199	0.46071		0.97106	0.73882	0.92957	1.04616	0.280902	0.580991	0.58236	0.87318	0.87046
0.97826	0.94336	1.06832	0.99241	0.48375		1.0811	0.65122	1.02981	0.77664	0.897827	0.663841	0.7833	0.87485	0.86099
1.03969	1.06219	1.05431	0.86537	0.78655		1.00189	0.91785	1.05114	1.11462	0.747746	0.742853	0.80844	0.71762	0.9166
0.93271	1.2859	0.94331	0.99149	1.08897		0.99709	1.10522	0.8368	0.734253	0.657242	0.66285	0.55151	0.8104	0.7751
1.03123	1.2329	1.12176	1.11886	0.96415		1.10848	0.92966	0.91405	1.11925	0.593116	0.538605	0.85575	0.60327	0.77956
1.07121	1.15269	0.82061	0.85891	0.90779		1.05963	0.81762	1.08397	0.619626	0.361744	0.486476	0.65955	0.85576	0.99916
1.01884	1.07192	1.0317	0.9417	1.01935		0.87716	1.05749	0.94343	0.368602	0.593726	0.752902	0.71126	0.60284	0.80835
0.92151	0.94729	1.22034	1.036	0.71344		0.67732	0.92337	0.57911	0.53504	0.889144	0.914117	0.42369	0.77034	0.77609
0.89032	0.8304	1.1599	0.80813	0.97681		0.89189	0.49856	1.13472	0.638476	0.636342	0.608424	0.86329	1.14235	0.9006
0.78021	1.11085	1.21702	1.0333	0.87277		1.18404	0.90875	1.06688	0.779998	0.762941	0.57593	0.90013	0.60544	0.8084
0.70956	1.01867	3.61139	1.05495	0.9997		0.85202	1.32841	0.99195	0.841942	0.684359	0.620452	0.64415	0.73444	0.73428
1.09642	0.9614	1.04906	0.97698	0.72891		0.97749	1.01347	1.14415	1.22189	0.725905	0.894076	0.64972	0.96671	0.89243
0.97635	1.15202	1.00712	1.04235	0.56401		0.38346	1.07218	0.98088	1.16716	0.428895	0.715302	0.92309	0.74534	0.79045
1.68383	1.07739	0.81445	1.06799	1.15703		1.48748	0.72317	1.22218	0.529908	0.866251	0.510442	0.91908	0.98385	0.97314
1.10875	1.01039	0.94752	0.75794	0.87897		0.72639	1.08445	1.0707	0.634261	0.71949	0.746502	0.8419	0.56693	1.01097
0.90261	0.79538	0.87122	0.83362	0.71404		1.10592	0.71192	0.90313	0.690747	0.64716	0.699893	0.77463	0.63201	0.84681
0.97688	1.03534	0.86993	0.87746	1.15941		0.80589	1.29599	0.48575	0.525584	0.88904	0.837754	0.69928	0.90739	0.73115
0.83483	0.96203	0.95021	0.95941	0.98763		0.99919	0.91936	0.77261	0.760172	0.833507	0.837868	0.92297	0.43992	0.66504
0.93038	1.13059	0.87558	1.00786	1.12134		0.98353	0.8168	0.91928	0.556053	1.41861	0.686891	0.79704	0.78762	0.84816
0.91815	0.96459	1.04786	0.98892	0.91482		0.90606	1.0243	1.04523	0.444051	0.625898	0.814501	0.88197	0.9933	0.75979
1.03115	0.76865	0.98986	0.94833	0.79697		0.83772	1.06491	0.98821	0.541991	0.571174	0.315014	0.55615	0.73718	0.58632
1.1294	0.85272	0.89881	0.64786	1.06425		0.93264	1.11452	0.993	0.674604	0.953664	0.726756	0.85914	0.42623	0.89043
0.76323	0.97275	0.74619	1.05206	1.0356		0.76514	1.06954	0.8762	0.47136	0.565807	0.726473	0.70841	0.5267	0.84916
1.06162	0.90717	1.06649	0.99075	1.05141		0.92702	0.63936	1.02564	0.76248	0.65625	0.677413	0.92558	0.90844	0.74455
1.12101	1.41905	0.96038	1.16694	1.12797		0.96931	0.80752	1.09445	0.838798	0.66723	0.692654	0.85533	0.54325	0.84353
1.21097	0.87508	0.60073	1.55271	1.05474		0.75768	0.89395	0.90807	0.473111	0.681231	0.716002	0.67611	0.64285	0.72022
0.92785	1.05687	0.8521	0.93263	0.97649		0.88743	0.98928	0.94893	1.23816	0.714802	0.674587	0.54815	0.61999	0.88457
1.06788	1.03107	0.44396	0.96226	0.94868		0.83895	0.76054	0.81792	0.595078	1.31008	0.683886	0.69239	0.62475	0.77418
0.96484	0.62059	1.00226	0.78214	0.98514		1.04737	1.02148	1.06433	0.416295	0.443364	0.614417	0.54945	0.92386	0.80834
1.19388	1.11175	1.0995	0.92378	0.76293		0.75061	0.95218	1.03114	1.23759	0.824057	0.973377	0.66953	0.79683	0.90146
0.94615	0.61144	1.19109	1.26475	0.91452		0.80718	0.98779	1.06925	0.63269	0.378125	0.424736	0.71708	0.91118	0.39738
0.86083	1.12756	0.9394	1.10816	0.8833		0.62106	0.79621	0.95448	0.450934	0.82943	0.455909	0.80256	0.98959	0.68617
1.06624	0.61684	0.83681	0.87556	0.93926		1.18111	1.08399	0.75125	0.740112	0.754044	0.533706	0.87529	0.79895	0.94822
0.84663	0.99064	0.66429	0.85916	0.99809		0.73583	1.15883	0.93647	0.729344	0.867823	1.05687	0.86469	0.84039	0.81073
0.74992	0.95652	0.91748	1.15154	1.10512		1.01725	0.72099	1.21575	0.820104	0.682746	0.46722	0.82391	0.61068	0.81352
0.86128	0.96304	1.36547	0.91658	1.02481		0.92813	0.94634	0.99248	0.602915	0.830808	1.24792	0.98968	0.78194	0.65267
1.13045	0.80016	0.95298	1.11431	0.90394		1.02146	1.04224	1.05956	0.734917	0.823023	0.923518	0.65296	0.79835	0.70499
1.24802	0.97148	1.20067	0.9044	0.79754		1.01567	0.99308	0.54631	0.617969	0.650278	0.953303	0.89087	0.6447	0.71229
0.54615	1.08672	0.95092	0.97695	1.17987		0.85187	0.9542	0.95935	0.569496	0.515971	0.839864	0.95196	0.60148	0.78397
1.04857	1.10021	0.92609	0.86388	0.938		1.16278	0.86959	0.89052	0.71416	0.648369	0.779822	0.71481	0.84663	1.07075
1.08471	1.00726	1.23825	0.9066	0.66221		1.0989	1.02593	1.18897	0.777614	0.719453	0.884906	0.77431	0.86725	0.90514
0.98837	0.61708	1.00219	0.50737	0.6187		1.19002	0.86622	1.0025	0.825156	0.780168	0.918704	0.95871	0.6864	0.81567
1.21304	0.99322	1.10744	0.74679	0.90917		0.22446	0.923	0.86287	0.804767	0.684192	0.84589	0.73153	0.71425	0.81759
1.11715	1.03544	0.93796	1.01081	0.70585		0.84453	1.03194	1.00842	0.800162	0.564613	0.556528	0.99086	0.79576	0.84959
0.6573	1.37239	0.39999	0.95906	0.93025		0.63551	0.71234	0.9258	0.990266	0.800653	0.845652	0.87589	0.70896	0.68033
1.12185	0.89593	1.04106	1.11429	1.05275		0.99258	1.05461	0.92791	0.538116	0.902396	0.894089	0.78631	0.95758	0.78063
0.63614	1.02562	0.94989	0.87987	1.02532		0.6203	1.00049	0.77498	0.86298	0.594586	0.751589	0.94043	0.72397	0.86354
0.39451	0.98218	1.04342	0.82222	1.06942		0.94213	0.81996	0.91902	0.545782	0.619711	0.255706	0.93097	0.82131	0.54275
1.13681	1.00113	1.04995	0.78267	0.81216		1.02864	0.74562	0.59636	1.14232	0.47909	1.15393	0.87723	0.68715	0.51955
1.27071	0.98577	0.99828	0.60238	1.10963		1.00705	0.25198	0.87388	1.01245	0.731255	0.378224	0.65251	0.59395	1.00012
0.98358	0.77709	0.83666	1.06161	1.03433		0.96058	0.7772	0.85464	0.707584	0.850272	0.879726	0.72445	0.69265	0.78346
1.01734	1.11702	1.00478	1.04531	1.07505		1.01552	0.84109	0.78038	0.954546	0.624562	0.738856	0.58394	0.94672	0.90309
1.18998	1.14143	0.81679	1.05911	1.14269		0.72662	0.76272	0.79485	0.441724	1.00893	0.436387	0.87785	0.98972	0.46049
0.5025	1.2041	0.72511	1.02333	0.89423		1.22211	1.06577	0.91082	0.33543	0.693162	1.08414	0.74054	0.72443	0.82958
1.12452	0.94801	1.06536	1.17262	0.69444		0.60873	0.91749	0.89637	0.949352	0.659146	0.427314	0.85898	0.86524	0.94938
0.98876	0.78615	0.924	0.98233	0.82263		0.82491	0.8334	0.92755	0.613058	0.773032	1.09342	0.84584	0.84538	0.83396
1.04157	0.99116	0.96126	0.83249	0.77779		0.82693	1.02228	0.90894	0.815914	0.753913	0.958535	0.90506	0.63792	0.74017
1.0888	1.17678	1.04984	1.22345	1.08622		0.9575	1.01476	0.8598	0.907521	0.966624	0.706065	0.60568	0.68308	0.68182
0.32912	1.12455	0.90315	1.00932	1.05183		0.8594	0.92855	1.20463	0.799986	0.710505	0.930633	0.96002	0.85334	0.94892
0.90255	0.78129	0.91007	0.89665	0.78775		0.92015	0.89171	0.96917	0.743377	0.468205	0.782177	0.72537	0.7922	0.39588
0.604	1.25369	0.92347	1.19409	0.93829		0.90576	0.81024	1.03822	0.387795	0.901343	0.880221	0.87257	0.75571	0.88884
1.27883	0.92848	1.18815	0.6973	1.00184		1.16784	0.93686	0.96072	0.736002	0.733047	0.588182	0.74075	0.53785	0.54641
0.96232	0.89646	1.07784	0.74524	1.0338		0.99497	1.02392	0.96802	0.808934	0.729435	0.544972	0.58305	0.82512	0.8042
1.10785	0.97288	0.94979	0.90932	1.05576		0.98152	0.92308	0.92232	1.05976	0.653651	0.582656	0.83185	0.79616	0.83573
1.12629	0.98333	0.87566	0.91584	1.04182		0.25672	0.72377	1.06228	0.477815	0.580061	0.456007	0.80874	0.75879	0.64297
1.07455	1.15704	1.04804	1.14648	0.52698		0.64154	0.92266	0.48438	0.374483	0.416058	0.552259	0.85745	0.81478	0.75856
0.96003	0.8591	1.03994	0.9051	0.90402		1.08479	0.71289	1.00842	0.748344	0.559071	0.877679	0.80931	0.76966	0.53691
0.97247	0.98614	0.9888	0.7884	0.93928		0.97654	0.95026	1.26413	0.892531	0.683765	0.790156	0.62421	0.47566	0.34864
0.99089	0.89017	1.11133	0.84156	0.83308		0.88893	0.90718	0.51864	0.399201	0.916199	0.900139	0.65428	0.93828	0.73057
0.95685	0.99931	0.81741	1.04944	0.93524		0.54142	0.99632	1.01455	0.631439	0.579108	0.886746	0.98091	0.90131	0.62736
1.05039	0.64383	1.15938	0.73486	0.75209		1.12584	1.16752	0.78492	1.13729	0.587838	0.81953	0.9457	0.64342	0.73114
0.88773	0.95832	1.0491	0.75822	0.96575		0.9626	1.01871	0.84676	1.07373	2.99391	0.80262	0.86856	0.73645	0.73192
0.92328	1.00932	0.31829	1.01391	0.93186		1.0312	1.00723	0.88244	0.601415	0.870926	1.0364	0.77909	1.04808	0.79751
1.03886	1.30117	0.99986	0.92547	1.03146		1.02775	0.83394	1.10712	0.811491	0.460427	0.871158	0.84394	0.83511	0.68961
1.04336	0.83402	0.8628	1.04096	0.84648		0.99075	0.95838	0.80942	0.847584	0.873256	0.981567	0.76497	0.87379	0.9418
1.04671	1.0104	1.09891	0.81421	1.04693		1.10019	0.9007	0.83915	0.90838	0.838177	0.918034	0.71531	0.92676	0.6625
0.96831	1.01776	1.07191	0.93501	0.74465		0.96203	0.90608	0.88895	0.661596	0.695622	0.472423	0.60514	0.91659	0.94657
1.08351	1.20247	1.13905	0.92982	0.88672		1.10991	0.98498	0.97196	0.88058	0.870202	0.883014	0.56438	0.56697	0.75772
1.02753	1.13284	0.81854	1.15279	1.13399		0.97699	1.09405	0.99467	0.863384	0.561236	0.695639	0.67198	0.84092	0.60818
1.05289	1.09219	1.22406	0.76691	0.99928		0.81251	0.92435	0.82718	0.833416	0.56824	0.947891	0.74215	0.83072	0.7345
1.03472	1.08231	1.12039	0.94747	0.68695		0.99542	0.64629	0.87545	0.475494	0.670702	0.698578	0.7635	0.98645	0.73466
0.7834	1.03449	1.07751	0.73402	0.91881		0.91144	0.81701	0.81088	0.488192	0.31048	0.404742	0.92711	0.68815	0.89572
0.96548	0.87777	0.97529	1.04879	0.5159		0.87079	0.86717	1.01356	0.898888	0.864402	0.568461	0.71141	0.87143	0.65138
1.01418	0.90649	0.95685	1.14306	0.91017		0.76284	1.16807	1.49182	0.794383	0.457756	0.815179	0.72685	0.62761	0.8711
1.12317	0.64996	0.91649	1.09423	0.95435		0.88097	1.07616	0.72143	0.729634	0.704737	0.585571	0.80442	0.85988	0.74754
0.67517	1.02341	0.875	0.79482	1.26036		0.98914	0.7959	2.10461	0.744959	0.555329	0.577706	1.0405	0.53402	0.88164
0.95231	0.87376	1.0452	0.8624	1.10833		1.01097	0.83869	0.8753	0.680039	0.957413	0.925681	0.8895	0.67796	0.69697
0.96197	1.04346	0.95269	0.77411	1.09474		0.444	0.98218	1.02619	0.674596	0.578948	0.952365	0.80753	0.76702	0.57124
1.12911	1.02583	1.17668	1.0145	0.88658		1.06681	1.03351	0.88329	1.00671	0.249066	0.446109	0.88589	0.31748	0.61603
1.16824	1.14613	0.83986	0.90879	1.09445		0.96885	0.97686	0.88762	0.734735	0.954332	0.76265	0.89472	0.84757	0.88987
0.97265	1.22511	0.79769	1.46596	0.9781		0.84882	1.06011	0.97869	0.678391	1.15591	0.760295	0.83705	0.84736	0.71944
1.10925	0.13726	0.77413	1.06391	1.00441		0.66636	1.13822	0.84083	0.795649	0.433179	0.714209	0.61884	0.85236	0.51338
0.72155	0.837	1.08459	0.97166	0.7428		0.99276	1.04599	0.64619	0.712273	0.381088	0.685691	0.84139	0.59075	1.02712
0.88756	1.06532	0.83335	0.45932	0.98802		0.85453	0.7916	0.9549	0.860189	0.780151	1.24879	0.89773	0.87416	0.53233
0.98292	1.06755	0.89598	0.97888	0.6365		0.89378	1.00601	1.20026	0.841121	0.799469	0.861274	0.88969	0.87866	0.92561
0.75003	0.95434	1.11437	0.92558	0.76881		0.95435	1.04774	0.9347	0.624305	0.282399	0.662017	0.94758	0.82741	0.72827
1.09712	1.09141	0.86822	0.97896	0.72058		1.05889	1.04665	0.95822	0.875779	0.753153	0.998927	0.85812	0.85745	0.80018
1.16812	1.08314	0.80681	0.71399	0.95074		1.0354	1.0683	0.93277	0.59031	0.662091	0.891777	0.80501	0.80729	0.64118
0.86271	1.04712	1.34786	1.09868	0.79651		0.76875	1.04974	0.92076	0.437668	1.39835	0.777721	0.75375	0.48152	0.84827
0.74218	1.07857	1.07043	1.06825	0.79205		0.87967	1.08655	1.11302	0.5134	0.6521	0.90305	0.94188	0.69113	0.81676
1.17801	0.45152	1.19243	1.05974	0.8312		0.64385	0.94122	1.14685	1.50872	0.934379	0.533419	0.85402	0.65264	0.9093
0.90285	0.88419	1.09453	1.12501	1.01666		1.01665	0.95145	0.95579	0.688685	1.04391	0.447913	0.89312	0.86727	0.76886
1.05473	0.88575	0.84364	0.92734	0.9994		0.81816	1.06194	1.01431	0.793101	0.530652	0.85022	0.73952	0.87756	0.64424
0.99007	0.69841	1.12611	1.05956	0.74735		1.02699	0.76951	0.67884	0.895788	0.476359	1.0214	0.67697	0.8389	0.90057
0.98236	0.69087	0.85338	0.91184	0.99735		0.79708	1.12159	1.09721	0.711736	0.979047	0.606206	0.71735	0.84262	0.82643
1.25724	0.90318	1.10418	0.98123	0.75664		0.95938	0.92708	0.91034	0.760484	1.13633	0.660889	0.96674	0.54279	0.96318
1.12498	0.7995	0.99237	0.86072	1.0688		1.07188	0.81881	0.50507	1.07726	0.483043	0.63405	0.7632	0.83023	0.69353
0.95969	1.04779	1.14529	1.65911	0.98866		0.88599	1.08312	0.66043	0.754592	0.759644	0.659704	0.82075	0.8804	0.86165
1.16008	1.01589	1.05988	0.7924	0.72944		0.86677	1.12776	1.082	0.732143	0.556207	0.755745	0.89726	0.73887	0.82317
1.25013	1.14362	1.05361	0.925	0.94953		1.05253	0.99547	1.06607	1.63575	0.811955	1.11997	0.61172	0.88037	0.63222
1.14734	1.00952	1.02016	1.00401	0.97655		1.0228	1.05106	1.1418	0.688736	0.913508	0.867401	0.77815	0.75639	0.88373
0.69631	0.84635	1.14808	0.83131	0.93116		0.93748	0.93865	0.9098	0.634727	0.704753	0.622842	0.82027	0.58357	0.71442
1.03033	0.9846	0.59059	0.98384	0.87446		0.89919	1.08047	0.70363	0.421341	0.632775	0.813776	0.72924	1.01518	0.48179
1.19708	1.36835	0.87356	0.54343	0.96035		0.96427	1.09829	1.02928	0.557172	0.679005	0.628294	0.77189	0.67941	0.72411
0.76763	1.18684	1.03483	0.63422	0.80455		0.88121	1.13768	1.08473	0.706604	0.963559	0.990889	0.92674	0.61007	0.85617
1.07358	1.19411	0.93805	0.85562	1.0255		0.88282	1.14432	1.03099	0.686856	0.892446	1.41409	0.68553	0.97368	0.80488
0.6002	1.13319	0.83786	0.59513	0.92681		0.92429	1.00705	0.78027	0.700945	0.808997	0.743578	1.47006	0.84522	0.95829
1.00407	0.98691	1.18349	0.87437	0.9667		0.69838	0.80837	0.89007	0.994122	0.714917	0.753639	0.80204	0.75602	0.80375
1.01604	1.0376	1.0022	1.08805	1.05443		0.91252	1.0193	0.84122	0.268984	0.385763	0.859764	0.91677	0.77869	0.78085
1.10774	1.18082	0.96109	0.99464	1.18945		1.16412	1.06883	1.11867	0.614147	0.727959	0.534464	0.77191	0.86307	0.73111
0.99465	1.27678	0.71968	1.10233	0.89502		1.27703	0.90401	1.02589	0.365418	0.886095	0.917203	0.96332	0.694	0.93413
0.89025	0.7484	0.98979	0.65916	0.83468		0.95849	0.97571	1.09101	0.596895	0.525783	1.13007	0.94186	0.74365	0.36717
0.91889	0.89632	1.42104	0.92538	0.92188		1.04525	1.08216	0.90924	1.05264	0.614545	0.720849	0.73511	0.85428	0.7193
1.17948	1.0452	1.03358	1.30408	1.18454		1.1038	0.99345	0.85579	0.857341	1.00983	0.849963	0.96745	0.87952	0.86366
1.05483	0.95589	1.02924	0.85792	0.96793		1.03627	0.92479	0.72407	1.82709	0.667884	0.780159	0.5711	0.84839	0.81579
1.10662	0.94911	1.09306	0.84117	1.09911		0.94583	1.10974	0.95967	0.690318	0.935617	0.493157	0.50252	0.46215	0.61094
0.87734	0.94344	0.89603	1.06317	1.11411		0.85096	0.99273	0.81402	0.944234	0.795584	0.852674	0.8656	0.88506	1.08325
1.02592	1.12995	1.13119	1.03647	1.04707		0.89161	0.93272	1.15178	0.765937	0.468809	0.929577	0.67271	0.60642	0.80346
0.63423	0.96432	0.77906	1.02414	0.67841		0.89191	0.844	0.71453	0.69772	0.893532	0.782164	0.74184	0.87869	0.74606
0.86	0.99452	0.89497	0.85021	0.91172		1.0555	0.68642	1.15129	0.669401	0.821736	0.592072	0.70465	0.51487	0.44353
0.68073	0.98611	0.97462	0.95962	1.09569		1.04715	1.09099	0.64953	0.442332	0.760449	0.668854	0.9736	0.7566	0.67616
0.98265	0.9201	1.18842	1.09318	0.70381		0.93851	0.777	1.01876	0.366939	1.0734	1.46999	0.75609	0.84002	0.87505
1.02395	1.04739	0.9189	0.85624	1.03259		0.98297	0.92171	0.65417	0.915742	0.496093	0.76198	0.88078	0.75533	1.02825
0.95266	1.2136	1.01423	1.05155	0.81361		0.42114	1.02377	1.0096	0.947571	0.803875	0.760234	0.71857	0.66897	0.83326
1.08814	1.16368	0.88747	0.76166	1.16913		0.69057	0.72931	0.92609	0.825006	0.859518	0.737994	0.85785	0.62177	0.71874
0.99988	0.65941	1.03255	0.95187	1.01662		0.7029	1.09006	0.97889	0.566135	0.945169	0.542285	0.73108	0.84042	0.86055
1.0809	0.71396	1.136	0.86358	0.90625		1.21228	0.91229	1.79534	0.89969	0.434076	0.740513	0.86893	0.83284	0.67975
0.61475	1.12	0.90677	0.84585	1.07713		0.92219	1.00303	0.76995	0.432944	0.645966	0.77882	1.0307	0.89669	0.78283
1.11672	0.81503	1.17406	1.03661	1.01168		0.70996	1.07103	0.87454	0.629109	0.785481	0.772246	0.81021	0.95138	0.82596
0.81031	0.79218	0.88108	0.76559	0.77976		1.07287	0.71288	1.08083	0.649474	0.884618	0.717825	0.88821	0.98204	0.54039
1.0604	1.0519	0.93719	1.03078	0.77477		1.0475	1.00833	1.0676	0.782223	1.16925	0.722608	0.96322	0.76714	0.81752
0.80624	0.86176	0.77498	0.72132	0.87615		0.91877	1.02508	0.72132	0.677238	0.723806	0.678906	0.77234	0.72036	0.91321
0.80331	1.06581	1.00591	1.12046	0.77996		0.62068	1.01064	0.95462	1.04253	0.843194	0.788719	0.69495	0.65077	0.66999
0.98653	0.96227	0.85243	0.85159	0.88818		0.94496	1.04601	0.99902	0.409453	0.397565	0.710457	0.84653	0.96226	0.87286
1.08738	0.91735	0.79703	0.92279	0.41176		1.09656	1.06415	0.93964	0.620449	0.549041	0.817989	0.86858	0.75056	0.55923
0.98788	1.10295	1.13488	0.99052	0.96613		1.0694	1.05819	0.86498	0.620282	0.588718	0.823205	0.90099	0.85379	0.82299
0.1592	1.05583	1.07627	1.15166	1.04078		1.15946	1.06777	0.81907	0.848705	0.71272	0.825407	0.41099	0.78158	0.59414
1.14906	0.59012	1.16166	1.01944	0.87946		0.99673	0.92964	0.99034	0.696884	0.584565	0.466316	0.66752	0.95527	0.88905
1.00114	0.9834	0.53399	0.82731	1.08465		1.0285	0.63457	0.82061	0.777388	0.549173	1.17444	1.01095	0.89069	0.38751
1.02192	0.74621	0.5217	1.45235	0.9292		0.94894	0.65516	0.97866	0.821992	0.982236	0.699288	0.84347	0.87667	0.6685
0.64828	0.80198	1.0467	1.18218	1.1817		0.95625	0.83269	1.03411	0.577906	0.240566	0.826099	0.80636	0.88763	0.80761
1.02652	0.75427	0.89707	0.95901	0.81314		1.04355	0.57576	1.07431	0.826883	0.669017	1.07211	0.82828	0.64869	0.83861
0.85423	1.01719	1.05475	1.14063	1.03028		0.89861	0.95961	1.16135	0.914167	0.34911	0.600248	0.86708	1.02089	0.69241
0.9537	1.04279	0.97617	0.93128	0.92945		0.9021	1.0536	0.89754	0.693683	0.707056	0.861245	0.95665	0.78271	0.89332
1.06036	0.66364	0.88694	0.81694	1.02123		1.00296	0.48276	0.88793	0.803607	0.490902	0.908439	0.95093	0.7415	0.92142
1.0166	1.11494	1.22456	0.83038	0.79775		1.1038	0.94259	1.0961	0.796647	0.80575	0.842621	0.68446	0.89401	0.73342
1.03258	0.90901	0.92655	0.91861	1.02864		1.0775	1.0349	0.75479	0.564346	0.347906	0.925422	0.89529	1.00264	0.95109
1.05779	0.84689	1.16051	0.84212	0.79112		1.01254	1.05281	0.78342	0.618756	0.493369	1.16987	0.93222	0.76669	0.80124
0.94969	0.93618	0.70001	0.25328	0.96275		1.09423	1.01219	0.97988	0.621551	0.530254	0.601717	0.86756	0.91201	0.78497
0.9956	0.70484	0.92059	0.75171	0.96435		0.44157	1.0704	0.74926	0.525537	0.880525	0.340925	0.23996	1.00611	0.76699
0.92647	1.0195	0.99583	0.96812	1.07891		0.87557	1.01197	0.95047	0.823397	0.776841	0.757052	0.55498	0.50687	0.51529
1.16322	0.97836	0.99701	1.19672	1.04566		1.41507	0.97395	0.88558	0.820706	0.370693	0.686799	0.60219	0.73961	0.66145
1.09178	1.14525	1.10626	0.75571	0.95515		0.9756	0.47394	1.96331	0.688293	0.664555	0.60892	0.7635	0.80269	0.8178
0.75844	0.86183	1.20303	0.84304	1.03022		1.03047	0.93393	0.95553	0.529736	0.625445	0.801136	1.1395	0.53041	0.87568
1.08664	0.99973	0.80173	0.89333	1.11752		1.66234	0.90561	1.56967	0.614789	0.682091	0.477425	0.86474	1.08252	0.891
1.01322	0.96209	1.2587	0.88856	0.96661		0.9072	1.12075	1.0914	0.758383	0.764	0.710726	0.85967	0.75406	0.77789
0.97429	0.96063	1.04963	0.92229	0.77293		1.06147	0.3833	2.85322	0.870596	0.684784	0.527592	0.4835	0.90321	0.83479
1.05763	0.97485	1.10599	0.75091	0.51553		1.02872	1.12167	0.81547	0.854804	0.628618	0.769379	0.97446	0.86309	0.68485
1.02417	0.77386	1.10923	0.77758	0.67324		1.01002	1.08805	0.93468	0.802778	0.674293	0.758783	0.8808	0.86892	0.72587
0.99617	0.76714	0.83737	1.00207	0.79958		0.86258	0.82747	0.67515	0.882529	0.793344	0.895685	0.92216	0.96809	0.93858
1.07188	0.75273	0.92161	1.10618	1.07172		1.09853	0.86959	1.03606	0.918303	0.522836	0.703623	1.08561	0.4756	0.91058
1.03137	1.01328	0.91872	0.67381	0.83466		0.72134	0.9994	1.01917	0.961627	0.726296	0.680382	0.82859	0.85031	0.50737
0.89064	0.77814	1.00482	0.75942	0.9642		0.93027	0.95	1.04237	0.598014	0.652064	0.0940167	0.57301	0.83636	0.62081
1.05298	1.06892	1.08558	0.84325	0.79799		1.00087	0.96737	0.9144	0.694093	0.468585	0.327734	0.75122	0.7136	0.54003
0.86123	1.51674	1.12855	1.00782	0.7854		0.92677	1.08027	0.97479	0.813673	0.912517	0.676171	0.72817	0.96333	0.47902
1.04268	1.10153	0.78771	0.85841	0.96375		0.84903	0.97381	1.05581	0.475752	0.462247	0.719441	0.95891	0.96733	0.58473
1.19149	0.88477	1.03313	0.81762	0.86824		0.94595	0.95313	0.88257	0.864305	0.681873	0.503541	0.54374	0.94768	0.78401
0.81514	0.68444	1.10778	1.06044	0.85908		0.86912	1.11724	1.08383	0.547254	0.785221	0.839139	0.74684	0.51288	0.73302
0.93476	1.03667	0.79536	0.92708	0.93151		1.14137	0.90491	0.97423	0.604109	1.22591	0.652524	0.92399	0.86235	0.81521
0.89651	1.12736	0.90848	1.11535	1.04733		0.88463	0.79549	0.77705	0.952366	0.339955	0.682444	0.86306	0.48865	1.1674
1.15163	0.8554	1.03548	0.86939	0.45226		0.76932	0.79333	0.89205	0.72683	0.803966	0.838355	1.05448	0.72397	0.72813
0.98975	0.64853	0.49243	0.73615	0.89486		1.08254	0.89519	0.50495	1.05689	0.61323	0.785258	0.74818	0.82406	0.83603
0.88099	0.80157	0.99029	1.23714	0.80031		1.00818	0.87128	0.99619	0.653712	0.716043	0.666148	0.9292	0.52674	0.77835
1.01337	0.85613	0.54164	0.67579	1.06494		1.01528	0.89189	0.8191	1.04959	0.911419	0.695378	1.01687	0.60953	0.92224
1.07481	1.34295	0.5381	1.0509	1.02334		0.96716	0.64279	0.97959	0.699489	0.722397	0.308577	0.97957	0.83229	0.80607
0.99233	0.71563	1.03212	0.91454	0.51628		0.73622	0.95134	1.18091	0.916423	0.866042	0.629126	0.90415	0.8512	0.88206
1.04093	1.08648	1.14383	1.1423	1.12268		1.10633	0.99811	0.93864	0.887855	0.322007	0.588102	0.74398	0.85668	0.86675
0.67733	1.00777	1.04331	0.98606	0.75249		0.94108	1.01755	0.66018	0.787793	0.84202	0.643029	0.68625	0.90243	0.67037
0.83002	1.25758	1.03131	1.16787	1.01292		0.93839	1.03049	1.07588	0.545231	0.628658	1.13118	0.62039	0.64584	0.67756
0.73311	0.98152	0.84162	1.0798	0.8722		0.65451	0.83979	0.79277	0.868422	0.688968	0.969241	0.92717	0.75534	0.79237
0.88839	1.05057	0.72978	0.99667	1.09669		1.07215	0.83938	0.99186	0.393544	0.516253	0.880017	0.8701	0.83941	0.85627
0.75636	0.76397	0.75608	1.02073	0.71598		0.725	0.81585	0.92038	0.320938	0.773678	0.818846	0.74164	0.89279	0.87656
0.63411	0.4363	1.17346	1.0664	0.93863		0.30859	0.64881	0.96094	0.639425	0.529647	0.586511	0.64008	0.73174	0.83519
1.10497	0.98029	0.99025	1.00421	0.91995		0.94971	0.89229	0.99972	0.751067	0.747231	0.783074	0.60609	0.90867	0.5862
0.95096	1.22191	0.80842	0.93668	0.91823		1.1994	0.66538	0.68936	0.704787	0.385799	1.1248	0.97668	0.79178	0.79302
1.0043	0.54518	0.98459	0.8298	1.01283		1.00491	0.96734	1.26381	0.667702	0.827958	0.984301	0.83598	0.77051	0.81704
1.08367	0.55491	1.08829	0.70723	1.18203		1.00251	1.13216	1.19967	0.862966	0.652859	0.758923	0.97886	0.80606	0.52662
1.13436	1.07061	1.29668	1.08808	0.9667		0.88544	0.93365	1.09796	0.67772	0.371439	0.615806	0.67155	0.89008	0.87669
1.32612	1.01512	1.07009	1.06076	1.03488		0.83483	1.06618	1.00663	0.804314	1.21418	0.61262	0.89355	0.87864	0.60176
1.00452	0.66563	0.91974	0.99011	0.81338		1.10306	0.78026	0.78949	0.78389	0.658292	0.970293	0.86862	0.89645	0.73438
0.8088	0.80803	1.04513	1.03107	1.18873		0.96643	1.1337	1.09148	0.840133	0.933506	0.390727	0.5356	0.81714	0.57327
1.18436	0.99508	1.23064	0.93266	1.15726		0.92438	0.87073	1.17856	0.837111	0.736559	0.90258	0.69917	0.62249	0.76569
1.21878	1.0346	0.93928	0.86699	0.95679		0.98242	0.93819	0.70425	0.710117	0.856717	1.00013	0.80017	0.56376	0.62473
0.98423	0.87085	0.5451	0.85429	0.86959		1.08286	1.05323	0.45685	0.72374	1.29215	1.0484	0.882	0.7045	0.71054
1.05157	0.5969	1.05956	1.11177	0.68067		0.82555	0.88144	1.01337	0.684229	0.491491	0.917091	0.85528	0.68608	0.77329
1.02815	1.04384	0.9489	0.5115	1.10362		0.65222	0.88018	0.98429	0.689028	0.847915	0.8299	0.70206	0.58344	0.87859
0.83375	0.87658	0.88392	0.77407	1.11785		1.16948	0.84757	0.98435	0.345581	0.668335	0.331112	0.89262	0.93253	0.87917
1.28489	1.19318	1.0085	0.8896	1.05435		0.81752	1.2191	1.144	0.677659	0.840668	0.837573	0.58011	0.85909	0.69445
0.46198	1.05934	1.06125	1.15007	0.95004		0.93027	0.95217	0.93612	0.670454	0.517641	0.871809	0.68527	0.84096	0.52482
1.01954	0.99266	0.95672	0.75822	1.02244		0.9709	1.11558	1.13322	0.556229	0.658772	0.611806	0.67365	0.73558	0.77526
0.95369	1.08823	0.97288	0.98166	0.80693		1.10896	0.93989	0.95671	0.719051	0.658823	0.848949	0.89463	0.76588	0.48089
1.06286	0.80976	0.96477	1.02899	0.9759		1.09339	0.98009	1.0287	0.667328	0.517646	0.851367	0.78482	0.82375	0.7197
1.20637	1.01297	0.8574	1.07072	1.07593		1.12303	0.79512	0.91743	0.870245	0.704221	0.725982	0.92153	0.65258	0.31443
1.0741	0.873	1.08575	0.86098	0.9622		0.83379	0.90881	0.83328	0.649223	0.670505	0.72809	1.0437	0.86138	0.87229
[truncated: 2,826 more rows]
